# Supplementary material for: Retinal pigment epithelium degeneration caused by aggregation of PRPF31 and the role of HSP70 family of proteins
Source: PubMed Central journal article supplement (PMC6938640; doi:10.1186/s10020-019-0124-z), 2019-12-31
Supplement: 10020_2019_124_MOESM1_ESM.pdf [file 10020_2019_124_MOESM1_ESM.pdf]

Supplementary Figure 1

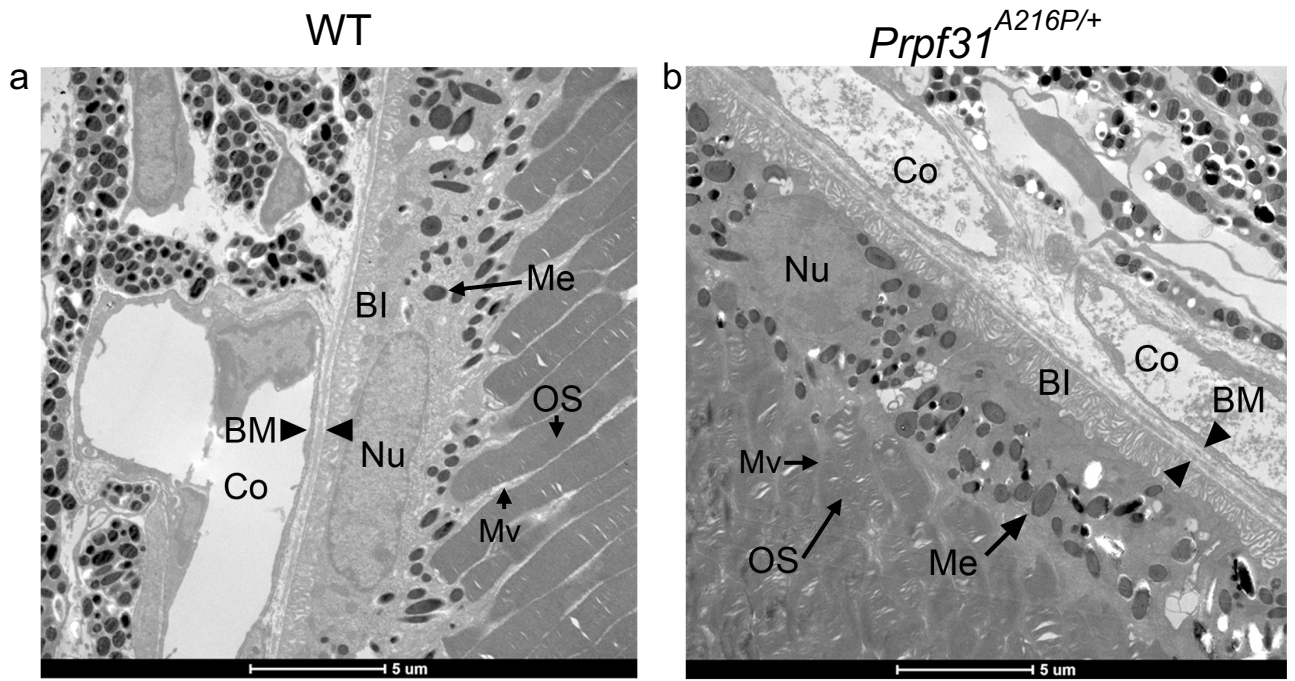

Supplementary Figure 2

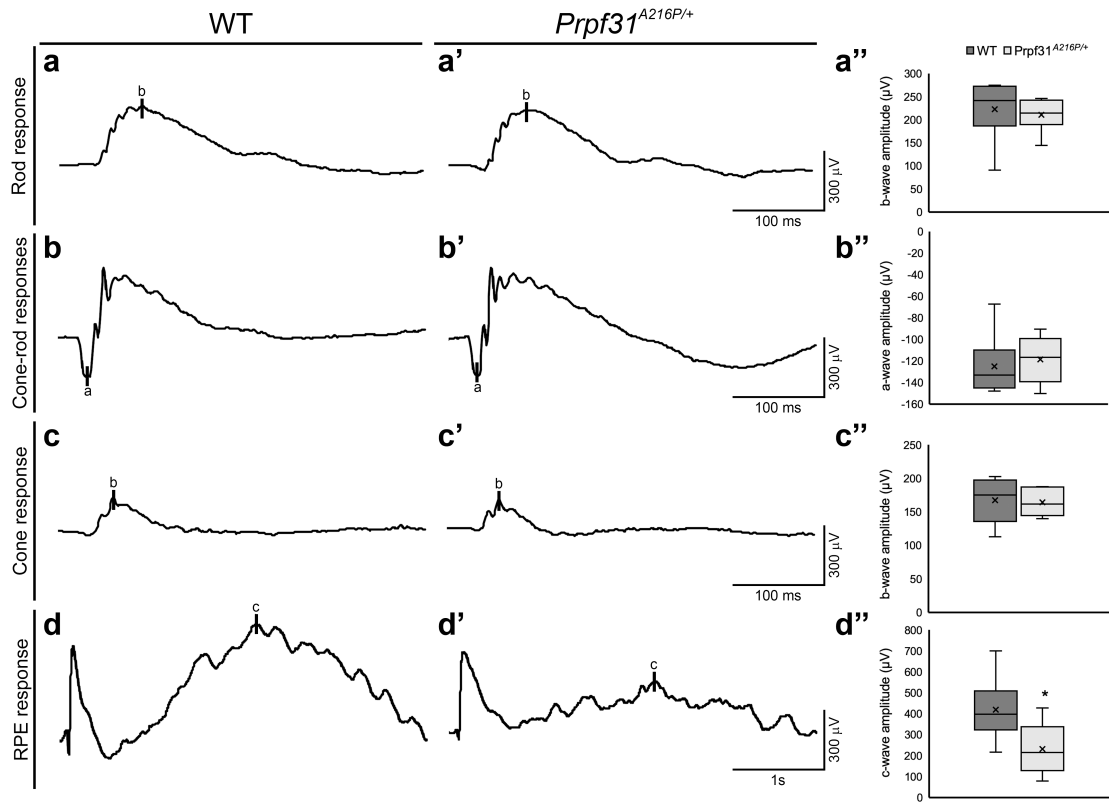

Supplementary Figure 3

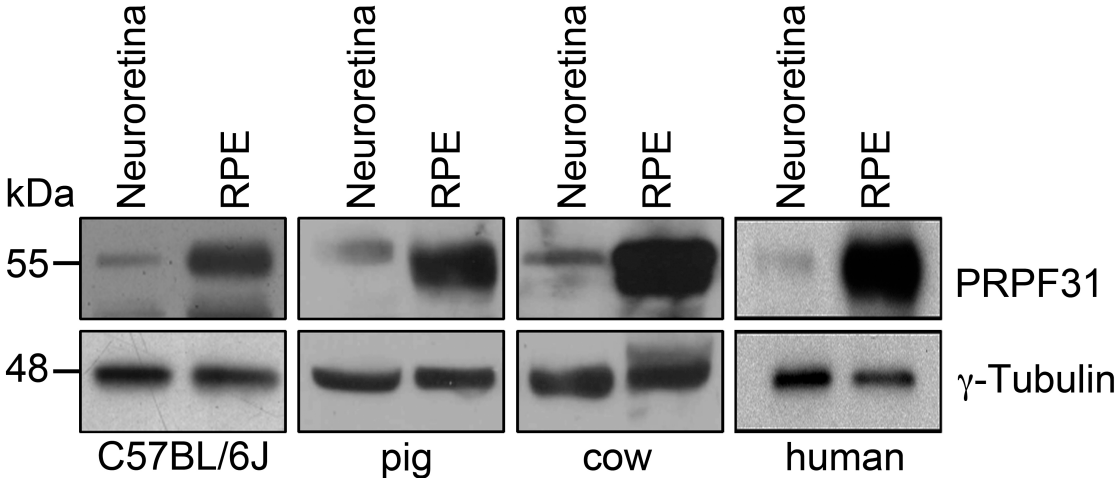

Supplementary Figure 4

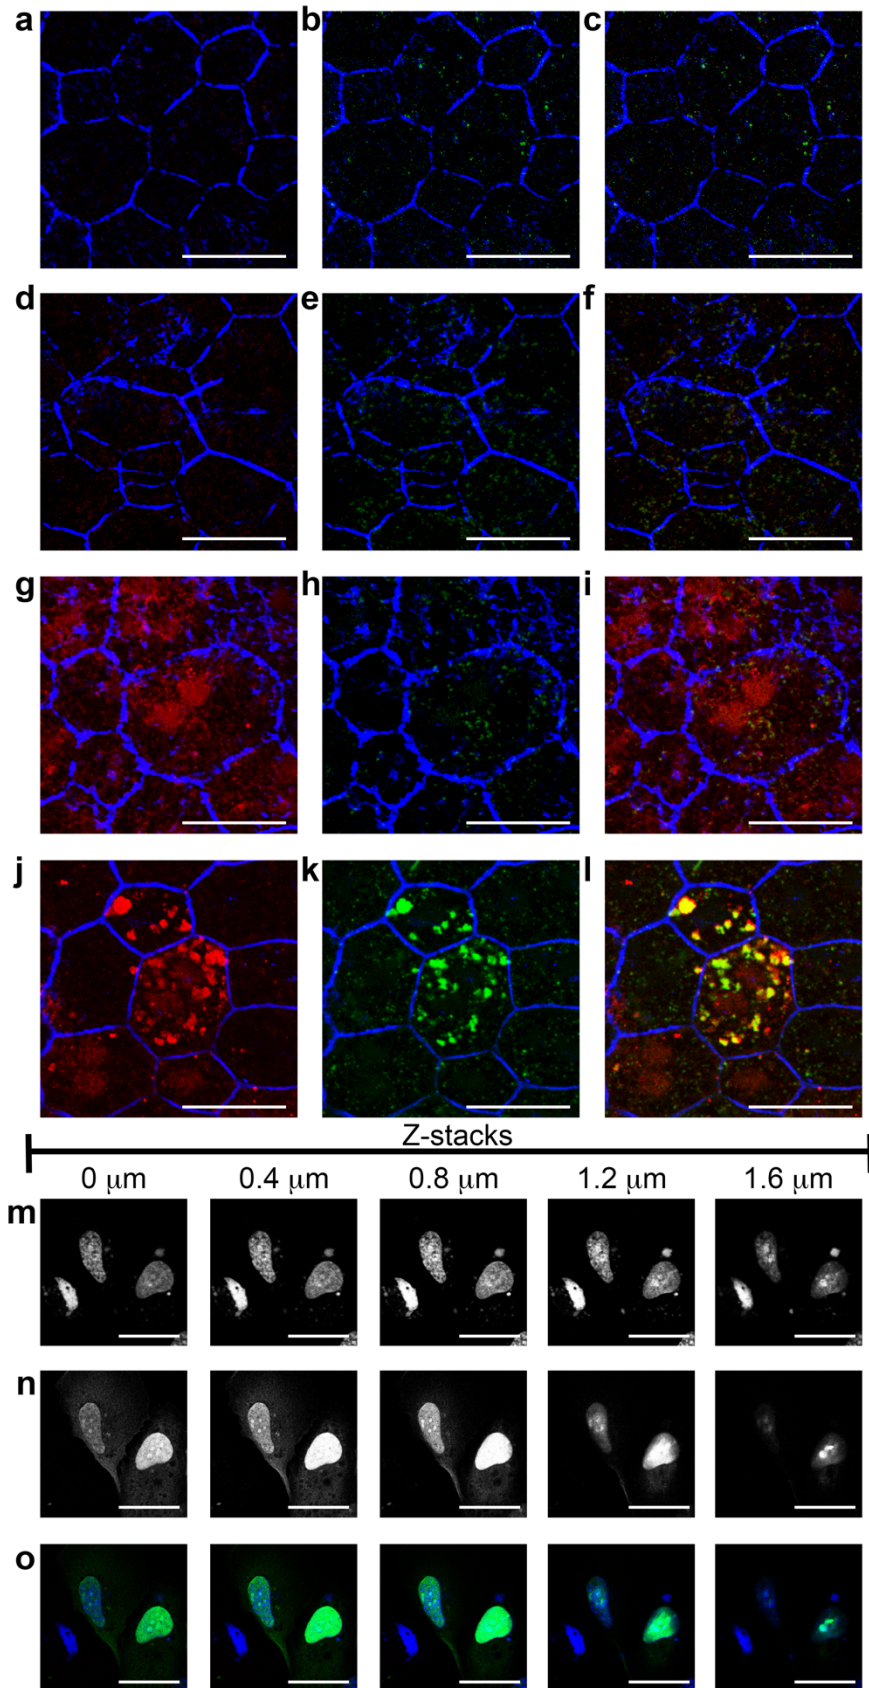

**Supplementary Table 1:** Gene ontology of differentially expressed genes in *Prpf31*<sup>A216P/+</sup> mice. The top 20 terms of 84 are listed.

| <b>Term</b>                                     | <b>Count (number of genes)</b> | <b>p-Value</b> |
|-------------------------------------------------|--------------------------------|----------------|
| Protein binding                                 | 123                            | <0.001         |
| Nucleotide binding                              | 51                             | 0.089          |
| Calcium ion binding                             | 31                             | <0.001         |
| Signal transducer activity                      | 27                             | 0.002          |
| Protein domain specific binding                 | 23                             | <0.001         |
| Protein heterodimerization activity             | 22                             | 0.004          |
| Protein complex binding                         | 20                             | <0.001         |
| Ion channel activity                            | 17                             | <0.001         |
| Histone binding                                 | 14                             | <0.001         |
| Voltage-gated ion channel activity              | 13                             | <0.001         |
| Syntaxin binding                                | 12                             | <0.001         |
| Microtubule binding                             | 12                             | 0.004          |
| Gtpase activity                                 | 12                             | 0.005          |
| Chloride channel activity                       | 11                             | <0.001         |
| Symporter activity                              | 11                             | <0.001         |
| Lyase activity                                  | 11                             | <0.001         |
| Protein C-terminus binding                      | 11                             | 0.014          |
| Extracellular ligand-gated ion channel activity | 10                             | <0.001         |
| Voltage-gated potassium channel activity        | 10                             | <0.001         |
| Ion channelbinding                              | 10                             | 0.001          |

DAVID v6.8, GOTERM\_MF\_DIRECT category.

**Supplementary Table 2:** Candidate genes differentially expressed in the RPE of *Prpf31*<sup>A216P/+</sup> vs WT mice. Default filter criteria, fold change < -2 or > 2 and *p*-value < 0.05.

| Functional Categories                             | Signaling Pathways and Diseases                    | Up-regulated                                                | Down-regulated                     |
|---------------------------------------------------|----------------------------------------------------|-------------------------------------------------------------|------------------------------------|
| Cell adhesion and migration                       | PI3K-Akt-mTOR-signaling pathway                    | <i>Akt3, Vtn, Fgf11, Gnb1, Gngt1, Gng3, Ppp2r2b</i>         |                                    |
|                                                   | Focal adhesion                                     | <i>Vtn, Shc3, Akt3</i>                                      |                                    |
|                                                   | Integrin-mediated cell adhesion                    | <i>Mapk10, Akt3, Shc3</i>                                   |                                    |
|                                                   | $\alpha$ 6- $\beta$ 4 Integrin signaling pathway   | <i>Prkca</i>                                                |                                    |
| Cell proliferation, differentiation and migration | MAPK signaling pathway                             | <i>Rasgrf2, Ppp3cc, Mapk10, Akt3</i>                        | <i>Il1a</i>                        |
|                                                   | Wnt signaling pathway                              | <i>Mapk10, Prkd1, Prkca, Akt3</i>                           |                                    |
| Cellular apoptosis                                | Apoptosis modulation by HSP70                      | <i>Mapk10</i>                                               |                                    |
|                                                   | FAS pathway and stress induction of HSP regulation |                                                             | <i>Il1a</i>                        |
| Cilium                                            | Ciliogenesis                                       | <i>Ahi1, Bbs4, Bbs7, Bbs9, Fam161a, Rp1, Rp111, Rpgrip1</i> |                                    |
| Inflammation                                      | Chemokine signaling pathway                        | <i>Shc3, Gnb1, Gnb3, Gnb5, Gngt, Grk1, Adcy1, Akt3</i>      |                                    |
|                                                   | Toll-like receptor signaling                       | <i>Mapk10, Akt3</i>                                         |                                    |
|                                                   | TNF- $\alpha$ NF- $\kappa$ B signaling pathway     | <i>Tnfaip3</i>                                              |                                    |
|                                                   | B cell receptor signaling pathway                  | <i>Prkd1</i>                                                |                                    |
|                                                   | T cell receptor signaling pathway                  | <i>Unc119</i>                                               |                                    |
|                                                   | IL-1 signaling pathway                             |                                                             | <i>Il1a, Il1f8, Il1f9</i>          |
|                                                   | IL-3 signaling pathway                             | <i>Dnm1, Prkca, Kcnip3</i>                                  |                                    |
|                                                   | IL-5 signaling pathway                             | <i>Unc119</i>                                               |                                    |
|                                                   | IL-6 signaling pathway                             | <i>Ppp2r2b</i>                                              |                                    |
|                                                   | Inflammatory response pathway                      | <i>Vnt</i>                                                  |                                    |
|                                                   | mRNA Processing                                    | mRNA processing                                             | <i>Snrpn, Elavl3, Pcbp3, Pcbp4</i> |
| Oxidative stress                                  | Oxidative stress                                   | <i>Mapk10</i>                                               |                                    |
|                                                   | Keap1-Nrf2 pathway                                 | <i>Prkca</i>                                                |                                    |
| Pluripotency                                      | Wnt signaling pathway                              | <i>Prkca, Prkd1, Mapk10, Ppp2r2b</i>                        |                                    |
| Protein metabolism                                | Proteasome degradation                             | <i>Uchl1</i>                                                |                                    |
|                                                   | Protein processing                                 | <i>Hspa4l</i>                                               |                                    |
| Retinol metabolism                                | Retinol metabolism                                 | <i>Rdh8, Rdh12</i>                                          |                                    |
| Voltage-gated channels                            | K <sup>+</sup> channel                             | <i>Kcnip3, Kcnma1, Kcnb1, Kcnab2</i>                        | <i>Kcnj13</i>                      |
|                                                   | Ca <sup>2+</sup> channel                           | <i>Cacna1f</i>                                              |                                    |

Transcriptome Analysis Console Software and DAVID v6.8.

**Supplementary Table 3:** Functional categories of genes having alternative splicing in *Prpf31*<sup>A216P/+</sup> mice. The top 40 terms of 174 are listed.

| <b>Term</b>              | <b>Count (number of genes)</b> | <b>p-Value</b> |
|--------------------------|--------------------------------|----------------|
| Phosphoprotein           | 2676                           | <0.001         |
| Membrane                 | 2195                           | 0.066          |
| Alternative splicing     | 1929                           | <0.001         |
| Cytoplasm                | 1499                           | <0.001         |
| Nucleus                  | 1394                           | <0.001         |
| Glycoprotein             | 1117                           | <0.001         |
| Coiledcoil               | 1113                           | <0.001         |
| Metal-binding            | 1107                           | <0.001         |
| Acetylation              | 908                            | <0.001         |
| Disulfide bond           | 831                            | 0.005          |
| Transport                | 668                            | <0.001         |
| Zinc                     | 652                            | <0.001         |
| Nucleotide-binding       | 647                            | <0.001         |
| Transferase              | 558                            | <0.001         |
| Transcription            | 553                            | <0.001         |
| Transcription regulation | 539                            | <0.001         |
| Ubl conjugation          | 536                            | <0.001         |
| ATP-binding              | 530                            | <0.001         |
| Hydrolase                | 517                            | <0.001         |
| Zinc-finger              | 482                            | <0.001         |
| DNA-binding              | 451                            | <0.001         |
| Cytoskeleton             | 406                            | <0.001         |
| Calcium                  | 375                            | <0.001         |
| Methylation              | 371                            | <0.001         |
| Isopeptide bond          | 346                            | <0.001         |
| Cell projection          | 309                            | <0.001         |
| Cell junction            | 308                            | <0.001         |
| Developmental protein    | 303                            | <0.001         |
| Ion transport            | 275                            | <0.001         |
| Endoplasmic reticulum    | 268                            | 0.068          |
| Golgi apparatus          | 265                            | <0.001         |
| Kinase                   | 263                            | <0.001         |
| Lipoprotein              | 253                            | <0.001         |
| Differentiation          | 240                            | <0.001         |
| Synapse                  | 214                            | <0.001         |
| Cell adhesion            | 211                            | <0.001         |
| RNA-binding              | 205                            | <0.001         |
| Cell cycle               | 198                            | <0.001         |
| Activator                | 194                            | <0.001         |
| Magnesium                | 191                            | <0.001         |

DAVID v6.8, UP\_KEYWORDS category.

**Supplementary Table 4:** Number of candidate genes showing alternative splicing in the RPE of *Prpf31*<sup>A216P/+</sup> vs WT mice. Default filter criteria, splicing index < -2 or > 2 and ANOVA *p* value < 0.05.

| Functional Categories                             | Signaling Pathways and Diseases                    | High splicing index | Low splicing index | Total number of genes showing alternative splining |
|---------------------------------------------------|----------------------------------------------------|---------------------|--------------------|----------------------------------------------------|
| Angiogenesis                                      | VEGF signaling pathway                             | 1                   | 0                  | 1                                                  |
| Cell adhesion and migration                       | PI3K-Akt-mTOR-signaling pathway                    | 47                  | 69                 | 116                                                |
|                                                   | Focal adhesion                                     | 29                  | 51                 | 80                                                 |
|                                                   | Integrin-mediated cell adhesion                    | 20                  | 22                 | 42                                                 |
|                                                   | $\alpha$ 6- $\beta$ 4 Integrin signaling pathway   | 10                  | 17                 | 27                                                 |
| Cell proliferation, differentiation and migration | MAPK signaling pathway                             | 29                  | 21                 | 50                                                 |
|                                                   | Wnt signaling pathway                              | 18                  | 13                 | 31                                                 |
| Cellular apoptosis                                | Apoptosis modulation by HSP70                      | 7                   | 13                 | 20                                                 |
|                                                   | FAS pathway and stress induction of HSP regulation | 3                   | 4                  | 7                                                  |
| Cilium                                            | Ciliogenesis                                       | 2                   | 5                  | 7                                                  |
| Inflammation                                      | Chemokine signaling pathway                        | 37                  | 26                 | 63                                                 |
|                                                   | Toll-like receptor signaling                       | 10                  | 17                 | 27                                                 |
|                                                   | TNF- $\alpha$ NF- $\kappa$ B signaling pathway     | 34                  | 27                 | 61                                                 |
|                                                   | B cell receptor signaling pathway                  | 25                  | 20                 | 45                                                 |
|                                                   | T cell receptor signaling pathway                  | 21                  | 21                 | 42                                                 |
|                                                   | IL-1 signaling pathway                             | 2                   | 7                  | 9                                                  |
|                                                   | IL-3 signaling pathway                             | 15                  | 15                 | 30                                                 |
|                                                   | IL-5 signaling pathway                             | 9                   | 13                 | 22                                                 |
|                                                   | IL-6 signaling pathway                             | 16                  | 13                 | 29                                                 |
|                                                   | Inflammatory response pathway                      | 3                   | 9                  | 12                                                 |
| mRNA Processing                                   | mRNA processing                                    | 72                  | 30                 | 102                                                |
| Oxidative stress                                  | Oxidative Stress                                   | 2                   | 0                  | 2                                                  |
|                                                   | Keap1-Nrf2 Pathway                                 | 2                   | 0                  | 2                                                  |
| Protein metabolism                                | Proteasome degradation                             | 3                   | 4                  | 7                                                  |
| Pluripotency                                      | Wnt signaling pathway                              | 16                  | 13                 | 29                                                 |
| Retinol metabolism                                | Retinol metabolism                                 | 5                   | 5                  | 10                                                 |

Transcriptome Analysis Console Software and DAVID v6.8
