# Supplementary material for: Retinal pigment epithelium degeneration caused by aggregation of PRPF31 and the role of HSP70 family of proteins
Source: PubMed Central journal article supplement (PMC6938640; doi:10.1186/s10020-019-0124-z), 2019-12-31
Supplement: 10020_2019_124_MOESM3_ESM.pdf [file 10020_2019_124_MOESM3_ESM.pdf]

| Transcript Cluster ID | Gene Fold Change ( Gene Symbol | PSR/Junction ID     | Splicing Index (linea ANOVA p-value (Prj | FDR p-value (Prpf31 Splicing Event | Estin Splicing Event | Score               | Comment |
|-----------------------|--------------------------------|---------------------|------------------------------------------|------------------------------------|----------------------|---------------------|---------|
| TC0300001915.mm.1     | -1,49 C430002E04Rik            | JUC0300007708.mm.1  | 50,3                                     | 0,001061                           | 0,316361             |                     |         |
| TC1400000505.mm.1     | -1,08                          | JUC1400002405.mm.1  | 37,46                                    | 0,020545                           | 0,478319             |                     |         |
| TC1200000089.mm.1     | 1,07 Smc6                      | JUC1200000514.mm.1  | 33,28                                    | 0,039894                           | 0,54093              |                     |         |
| TC0300001064.mm.1     | 1,27 Ptpn22                    | JUC0300004475.mm.1  | 26,4                                     | 0,008608                           | 0,40841              |                     |         |
| TC0300001064.mm.1     | 1,27 Ptpn22                    | JUC0300004470.mm.1  | -2,06                                    | 0,008958                           | 0,411476             |                     |         |
| TC0300001064.mm.1     | 1,27 Ptpn22                    | JUC0300004471.mm.1  | -2,12                                    | 0,035785                           | 0,529153             |                     |         |
| TC0900002601.mm.1     | -1,06 Lipc                     | JUC09000012161.mm.1 | 24,11                                    | 0,00121                            | 0,322251             |                     |         |
| TC1000001090.mm.1     | 1,55 Anks1b                    | JUC1000004455.mm.1  | 23,37                                    | 0,001083                           | 0,317191             |                     |         |
| TC1000001090.mm.1     | 1,55 Anks1b                    | PSR1000008316.mm.1  | 11,4                                     | 0,000278                           | 0,28803              | Cassette Exon       | 0,38    |
| TC1000001090.mm.1     | 1,55 Anks1b                    | JUC1000004460.mm.1  | 9,7                                      | 0,001667                           | 0,335182             |                     |         |
| TC1000001090.mm.1     | 1,55 Anks1b                    | PSR1000008314.mm.1  | 6,28                                     | 0,001612                           | 0,332831             | Cassette Exon       | 0,28    |
| TC1000001090.mm.1     | 1,55 Anks1b                    | JUC1000004454.mm.1  | 5,72                                     | 0,025794                           | 0,498519             |                     |         |
| TC1000001090.mm.1     | 1,55 Anks1b                    | PSR1000008315.mm.1  | 5,08                                     | 0,004055                           | 0,361816             | Cassette Exon       | 0,3     |
| TC1000001090.mm.1     | 1,55 Anks1b                    | PSR1000008308.mm.1  | 4,79                                     | 0,001115                           | 0,317328             | Cassette Exon       | 0,4     |
| TC1000001090.mm.1     | 1,55 Anks1b                    | JUC1000004453.mm.1  | 4,7                                      | 0,001544                           | 0,330631             |                     |         |
| TC1000001090.mm.1     | 1,55 Anks1b                    | PSR1000008318.mm.1  | 4,69                                     | 0,002634                           | 0,349612             | Cassette Exon       | 0,36    |
| TC1000001090.mm.1     | 1,55 Anks1b                    | JUC1000004463.mm.1  | 4,63                                     | 0,000853                           | 0,311909             |                     |         |
| TC1000001090.mm.1     | 1,55 Anks1b                    | JUC1000004471.mm.1  | 4                                        | 0,043295                           | 0,549297             |                     |         |
| TC1000001090.mm.1     | 1,55 Anks1b                    | JUC1000004451.mm.1  | 3,88                                     | 0,001372                           | 0,32572              |                     |         |
| TC1000001090.mm.1     | 1,55 Anks1b                    | PSR1000008306.mm.1  | 3,67                                     | 0,013945                           | 0,446234             | Cassette Exon       | 0,38    |
| TC1000001090.mm.1     | 1,55 Anks1b                    | PSR1000008311.mm.1  | 3,23                                     | 0,013996                           | 0,446353             | Cassette Exon       | 0,48    |
| TC1000001090.mm.1     | 1,55 Anks1b                    | PSR1000008319.mm.1  | 3,22                                     | 0,009654                           | 0,417445             | Cassette Exon       | 0,34    |
| TC1000001090.mm.1     | 1,55 Anks1b                    | PSR1000008395.mm.1  | 2,9                                      | 0,035621                           | 0,528956             |                     |         |
| TC1000001090.mm.1     | 1,55 Anks1b                    | JUC1000004458.mm.1  | 2,9                                      | 0,002757                           | 0,350151             |                     |         |
| TC1000001090.mm.1     | 1,55 Anks1b                    | PSR1000008367.mm.1  | 2,68                                     | 0,01642                            | 0,458966             | Alternative 5' Donc | 0,23    |
| TC1000001090.mm.1     | 1,55 Anks1b                    | PSR1000008320.mm.1  | 2,66                                     | 0,018788                           | 0,470789             | Cassette Exon       | 0,3     |
| TC1000001090.mm.1     | 1,55 Anks1b                    | PSR1000008321.mm.1  | 2,63                                     | 0,04609                            | 0,555702             | Cassette Exon       | 0,22    |
| TC1000001090.mm.1     | 1,55 Anks1b                    | PSR1000008322.mm.1  | 2,35                                     | 0,034725                           | 0,526521             | Cassette Exon       | 0,27    |
| TC1000001090.mm.1     | 1,55 Anks1b                    | JUC1000004462.mm.1  | 2,34                                     | 0,039116                           | 0,538475             |                     |         |
| TC1000001090.mm.1     | 1,55 Anks1b                    | JUC1000004491.mm.1  | -2,31                                    | 0,033144                           | 0,521912             |                     |         |
| TC1000001090.mm.1     | 1,55 Anks1b                    | JUC1000004496.mm.1  | -3,55                                    | 0,015131                           | 0,452674             |                     |         |
| TC0400000432.mm.1     | 1,76 Unc13b                    | JUC0400001371.mm.1  | 22,06                                    | 0,00841                            | 0,406611             |                     |         |
| TC0400000432.mm.1     | 1,76 Unc13b                    | PSR0400002837.mm.1  | 8,69                                     | 0,001521                           | 0,330287             | Cassette Exon       | 0,51    |
| TC0400000432.mm.1     | 1,76 Unc13b                    | JUC0400001376.mm.1  | 5,28                                     | 0,002068                           | 0,342                |                     |         |
| TC0400000432.mm.1     | 1,76 Unc13b                    | JUC0400001356.mm.1  | 2,8                                      | 0,046584                           | 0,556769             |                     |         |
| TC0400000432.mm.1     | 1,76 Unc13b                    | JUC0400001366.mm.1  | 2,54                                     | 0,002505                           | 0,349237             |                     |         |
| TC0400000432.mm.1     | 1,76 Unc13b                    | JUC0400001328.mm.1  | 2,43                                     | 0,007259                           | 0,39826              |                     |         |
| TC0400000432.mm.1     | 1,76 Unc13b                    | PSR0400002773.mm.1  | 2,38                                     | 0,006576                           | 0,39213              | Cassette Exon       | 0,33    |
| TC0400000432.mm.1     | 1,76 Unc13b                    | PSR0400002772.mm.1  | 2,18                                     | 0,008702                           | 0,40901              | Cassette Exon       | 0,25    |
| TC0400000432.mm.1     | 1,76 Unc13b                    | JUC0400001375.mm.1  | 2,09                                     | 0,012529                           | 0,43545              |                     |         |
| TC0400000432.mm.1     | 1,76 Unc13b                    | PSR0400002796.mm.1  | -2,07                                    | 0,038022                           | 0,535471             | Alternative 3' Acce | 0,17    |
| TC0400000432.mm.1     | 1,76 Unc13b                    | JUC0400001361.mm.1  | -2,07                                    | 0,008768                           | 0,409781             |                     |         |
| TC0400000432.mm.1     | 1,76 Unc13b                    | PSR0400002770.mm.1  | -2,24                                    | 0,015339                           | 0,453763             | Cassette Exon       | 0,12    |
| TC0400000432.mm.1     | 1,76 Unc13b                    | JUC0400001348.mm.1  | -2,26                                    | 0,007265                           | 0,39826              |                     |         |
| TC0400000432.mm.1     | 1,76 Unc13b                    | JUC0400001364.mm.1  | -3,05                                    | 0,048134                           | 0,559938             |                     |         |
| TC0400000432.mm.1     | 1,76 Unc13b                    | PSR0400002816.mm.1  | -3,77                                    | 0,000456                           | 0,298954             | Alternative 3' Acce | 0,24    |
| TC0400000432.mm.1     | 1,76 Unc13b                    | JUC0400001377.mm.1  | -3,89                                    | 0,036527                           | 0,531352             |                     |         |

|                   |                      |                    |       |          |          |                     |      |
|-------------------|----------------------|--------------------|-------|----------|----------|---------------------|------|
| TC1600000301.mm.1 | 1,32 Vps8            | JUC1600001621.mm.1 | 20,46 | 0,001059 | 0,316361 |                     |      |
| TC1600000301.mm.1 | 1,32 Vps8            | JUC1600001573.mm.1 | 3,36  | 0,010032 | 0,41878  |                     |      |
| TC1600000301.mm.1 | 1,32 Vps8            | JUC1600001608.mm.1 | 2,55  | 0,002274 | 0,345991 |                     |      |
| TC1600000301.mm.1 | 1,32 Vps8            | JUC1600001592.mm.1 | 2,29  | 0,030508 | 0,51337  |                     |      |
| TC1600000301.mm.1 | 1,32 Vps8            | PSR1600003022.mm.1 | 2,2   | 0,020194 | 0,477145 | Cassette Exon       | 0,28 |
| TC1700000602.mm.1 | -2,48 Rgl2           | JUC1700003070.mm.1 | 19,87 | 0,008864 | 0,410539 |                     |      |
| TC1700000602.mm.1 | -2,48 Rgl2           | JUC1700003073.mm.1 | 4,15  | 0,004219 | 0,363236 |                     |      |
| TC1700000602.mm.1 | -2,48 Rgl2           | PSR1700005580.mm.1 | 2,02  | 0,027632 | 0,50464  | Cassette Exon       | 0,19 |
| TC0100003183.mm.1 | 2,06 Crb1            | JUC0100014675.mm.1 | 19,29 | 0,00023  | 0,28803  |                     |      |
| TC0100003183.mm.1 | 2,06 Crb1            | PSR0100025790.mm.1 | 6,46  | 0,001645 | 0,33384  | Cassette Exon       | 0,27 |
| TC0100003183.mm.1 | 2,06 Crb1            | PSR0100025800.mm.1 | 3,19  | 0,002177 | 0,344453 | Cassette Exon       | 0,34 |
| TC0100003183.mm.1 | 2,06 Crb1            | PSR0100025791.mm.1 | 2,74  | 0,009491 | 0,416578 | Cassette Exon       | 0,27 |
| TC0100003183.mm.1 | 2,06 Crb1            | PSR0100025799.mm.1 | 2,73  | 0,027945 | 0,505612 | Cassette Exon       | 0,34 |
| TC0100003183.mm.1 | 2,06 Crb1            | PSR0100025789.mm.1 | 2,66  | 0,030101 | 0,511957 | Cassette Exon       | 0,27 |
| TC0100003183.mm.1 | 2,06 Crb1            | JUC0100014663.mm.1 | 2,59  | 0,021033 | 0,480239 |                     |      |
| TC0100003183.mm.1 | 2,06 Crb1            | PSR0100025798.mm.1 | 2,56  | 0,025204 | 0,49668  | Cassette Exon       | 0,34 |
| TC0100003183.mm.1 | 2,06 Crb1            | PSR0100025794.mm.1 | 2,4   | 0,007043 | 0,396259 | Cassette Exon       | 0,18 |
| TC0100003183.mm.1 | 2,06 Crb1            | PSR0100025797.mm.1 | 2,3   | 0,000861 | 0,311909 | Cassette Exon       | 0,12 |
| TC0100003183.mm.1 | 2,06 Crb1            | JUC0100014664.mm.1 | 2,26  | 0,016642 | 0,459985 |                     |      |
| TC0100003183.mm.1 | 2,06 Crb1            | JUC0100014667.mm.1 | 2,22  | 0,002202 | 0,345178 |                     |      |
| TC0100003183.mm.1 | 2,06 Crb1            | PSR0100025796.mm.1 | 2,19  | 0,012828 | 0,437596 | Cassette Exon       | 0,12 |
| TC0100003183.mm.1 | 2,06 Crb1            | PSR0100025802.mm.1 | 2,12  | 0,015966 | 0,456885 | Cassette Exon       | 0,34 |
| TC0100003183.mm.1 | 2,06 Crb1            | PSR0100025793.mm.1 | 2,11  | 0,009432 | 0,416082 | Cassette Exon       | 0,18 |
| TC0100003183.mm.1 | 2,06 Crb1            | PSR0100025811.mm.1 | -2,1  | 0,022728 | 0,48778  | Cassette Exon       | 0,21 |
| TC0100003183.mm.1 | 2,06 Crb1            | JUC0100014672.mm.1 | -3,46 | 0,023353 | 0,490143 |                     |      |
| TC0100003183.mm.1 | 2,06 Crb1            | PSR0100025788.mm.1 | -3,77 | 0,007173 | 0,397855 | Alternative 5' Donc | 0,44 |
| TC0500003055.mm.1 | 1,99 Svop            | JUC0500014857.mm.1 | 19,28 | 0,001892 | 0,338712 |                     |      |
| TC0500003055.mm.1 | 1,99 Svop            | PSR0500027189.mm.1 | 2,49  | 0,003597 | 0,356223 | Cassette Exon       | 0,17 |
| TC0500003055.mm.1 | 1,99 Svop            | PSR0500027191.mm.1 | 2,25  | 0,020715 | 0,479166 | Cassette Exon       | 0,11 |
| TC0500003055.mm.1 | 1,99 Svop            | JUC0500014866.mm.1 | -2,13 | 0,046417 | 0,556519 |                     |      |
| TC0500003055.mm.1 | 1,99 Svop            | PSR0500027171.mm.1 | -2,21 | 0,022049 | 0,485327 | Cassette Exon       | 0,07 |
| TC0500003055.mm.1 | 1,99 Svop            | PSR0500027194.mm.1 | -2,31 | 0,038249 | 0,535883 | Cassette Exon       | 0,07 |
| TC0500003055.mm.1 | 1,99 Svop            | PSR0500027196.mm.1 | -2,48 | 0,035063 | 0,527574 | Alternative 5' Donc | 0,2  |
| TC0500003055.mm.1 | 1,99 Svop            | JUC0500014856.mm.1 | -2,54 | 0,007815 | 0,403089 |                     |      |
| TC1600000866.mm.1 | 1,03 2810055G20Rik   | PSR1600007110.mm.1 | 19,22 | 0,029078 | 0,509063 | Alternative 5' Donc | 0,48 |
| TC1600000866.mm.1 | 1,03 2810055G20Rik   | PSR1600007118.mm.1 | -2,03 | 0,005406 | 0,379052 | Cassette Exon       | 0,1  |
| TC1600000866.mm.1 | 1,03 2810055G20Rik   | PSR1600007130.mm.1 | -2,39 | 0,043933 | 0,550715 | Cassette Exon       | 0,08 |
| TC1600000866.mm.1 | 1,03 2810055G20Rik   | PSR1600007111.mm.1 | -2,66 | 0,026084 | 0,499688 | Alternative 3' Acce | 0,24 |
| TC1600000866.mm.1 | 1,03 2810055G20Rik   | PSR1600007134.mm.1 | -3,65 | 0,026167 | 0,50003  | Alternative 5' Donc | 0,42 |
| TC1600000866.mm.1 | 1,03 2810055G20Rik   | PSR1600007107.mm.1 | -3,72 | 0,028427 | 0,507218 | Cassette Exon       | 0,25 |
| TC0300000238.mm.1 | 1,26 Sox2ot; Mir1897 | JUC0300000774.mm.1 | 19,14 | 0,031763 | 0,517489 |                     |      |
| TC0300000238.mm.1 | 1,26 Sox2ot; Mir1897 | PSR0300001526.mm.1 | -2,13 | 0,047095 | 0,557857 | Cassette Exon       | 0,11 |
| TC0400003814.mm.1 | 1,26 Alpl            | JUC0400016346.mm.1 | 19,08 | 0,002326 | 0,346856 |                     |      |
| TC0400003814.mm.1 | 1,26 Alpl            | PSR0400031453.mm.1 | 6,58  | 0,014552 | 0,44963  | Cassette Exon       | 0,42 |
| TC0400003814.mm.1 | 1,26 Alpl            | JUC0400016347.mm.1 | 2,39  | 0,00518  | 0,376851 |                     |      |
| TC0700003152.mm.1 | -2,06                | PSR0700028330.mm.1 | 19,06 | 0,000443 | 0,297771 | Cassette Exon       | 0,29 |
| TC0700003152.mm.1 | -2,06                | PSR0700028329.mm.1 | 7,7   | 0,0006   | 0,304044 | Cassette Exon       | 0,29 |
| TC0900001445.mm.1 | 1,2 Map4; Mtap4      | JUC0900006720.mm.1 | 18,59 | 0,001513 | 0,330268 |                     |      |

|                   |                    |                    |       |          |                              |      |
|-------------------|--------------------|--------------------|-------|----------|------------------------------|------|
| TC0900001445.mm.1 | 1,2 Map4; Mtap4    | PSR0900012034.mm.1 | 7,75  | 0,002643 | 0,349612 Alternative 3' Acce | 0,34 |
| TC0900001445.mm.1 | 1,2 Map4; Mtap4    | JUC0900006717.mm.1 | 6,92  | 0,003037 | 0,353792                     |      |
| TC0900001445.mm.1 | 1,2 Map4; Mtap4    | JUC0900006711.mm.1 | 4,86  | 0,006882 | 0,394341                     |      |
| TC0900001445.mm.1 | 1,2 Map4; Mtap4    | PSR0900012021.mm.1 | 3,59  | 0,003054 | 0,353892 Alternative 3' Acce | 0,49 |
| TC0900001445.mm.1 | 1,2 Map4; Mtap4    | PSR0900012033.mm.1 | 2,83  | 0,003682 | 0,357266 Cassette Exon       | 0,51 |
| TC0900001445.mm.1 | 1,2 Map4; Mtap4    | JUC0900006714.mm.1 | -2,55 | 0,044517 | 0,551825                     |      |
| TC0900001445.mm.1 | 1,2 Map4; Mtap4    | JUC0900006715.mm.1 | -4,26 | 0,024828 | 0,495379                     |      |
| TC0500003212.mm.1 | 1,4 Atp2a2         | JUC0500015649.mm.1 | 18,38 | 0,004411 | 0,366761                     |      |
| TC1000001266.mm.1 | -1,11 Ppp1r12a     | JUC1000005141.mm.1 | 17,86 | 0,000047 | 0,24627                      |      |
| TC1000001266.mm.1 | -1,11 Ppp1r12a     | JUC1000005147.mm.1 | 2,74  | 0,021906 | 0,484824                     |      |
| TC0200001472.mm.1 | 1,39 Lrrc4c; Palld | JUC0200005652.mm.1 | 17,78 | 0,016313 | 0,45857                      |      |
| TC0200001472.mm.1 | 1,39 Lrrc4c; Palld | PSR0200011257.mm.1 | 4,58  | 0,004135 | 0,3623 Cassette Exon         | 0,5  |
| TC0200001472.mm.1 | 1,39 Lrrc4c; Palld | PSR0200011259.mm.1 | 2,12  | 0,03622  | 0,530202 Cassette Exon       | 0,27 |
| TC0900000959.mm.1 | -1,26 Zfp280d      | PSR0900007346.mm.1 | 17,04 | 0,029516 | 0,510172 Alternative 3' Acce | 0,62 |
| TC0900000959.mm.1 | -1,26 Zfp280d      | JUC0900004012.mm.1 | 6,55  | 0,023686 | 0,491379                     |      |
| TC0900000959.mm.1 | -1,26 Zfp280d      | JUC0900004023.mm.1 | -2,46 | 0,039839 | 0,540922                     |      |
| TC0900000888.mm.1 | 1,07 Vps13c        | JUC0900003709.mm.1 | 17,01 | 0,004012 | 0,361242                     |      |
| TC0900000888.mm.1 | 1,07 Vps13c        | JUC0900003704.mm.1 | 7,51  | 0,005228 | 0,377399                     |      |
| TC0900000888.mm.1 | 1,07 Vps13c        | PSR0900006845.mm.1 | 7,39  | 0,027944 | 0,505612 Cassette Exon       | 0,6  |
| TC0900000888.mm.1 | 1,07 Vps13c        | PSR0900006846.mm.1 | 4,7   | 0,041648 | 0,545276 Cassette Exon       | 0,6  |
| TC0800002553.mm.1 | -1,23 Tecr         | JUC0800010565.mm.1 | 16,85 | 0,002548 | 0,349501                     |      |
| TC1300000972.mm.1 | 1,42 Mef2c         | JUC1300003317.mm.1 | 16,79 | 0,000247 | 0,28803                      |      |
| TC1300000972.mm.1 | 1,42 Mef2c         | JUC1300003318.mm.1 | 14,62 | 0,004973 | 0,373851                     |      |
| TC1300000972.mm.1 | 1,42 Mef2c         | JUC1300003319.mm.1 | 10,97 | 0,021084 | 0,480371                     |      |
| TC1300000972.mm.1 | 1,42 Mef2c         | PSR1300006261.mm.1 | 7,87  | 0,000963 | 0,313363 Cassette Exon       | 0,48 |
| TC1300000972.mm.1 | 1,42 Mef2c         | PSR1300006266.mm.1 | 3,72  | 0,00239  | 0,348564 Mutually Exclusive  | 0,44 |
| TC1300000972.mm.1 | 1,42 Mef2c         | PSR1300006267.mm.1 | -2,33 | 0,004387 | 0,366156 Mutually Exclusive  | 0,44 |
| TC1300000972.mm.1 | 1,42 Mef2c         | PSR1300006253.mm.1 | -2,55 | 0,030972 | 0,514659 Alternative 3' Acce | 0,11 |
| TC1300000972.mm.1 | 1,42 Mef2c         | JUC1300003305.mm.1 | -2,85 | 0,011115 | 0,426                        |      |
| TC1300000972.mm.1 | 1,42 Mef2c         | JUC1300003306.mm.1 | -3,01 | 0,022938 | 0,488667                     |      |
| TC1300000972.mm.1 | 1,42 Mef2c         | JUC1300003309.mm.1 | -3,82 | 0,003951 | 0,359922                     |      |
| TC0200001023.mm.1 | 3,39 Gad1          | JUC0200004207.mm.1 | 16,55 | 0,001181 | 0,319954                     |      |
| TC0200001023.mm.1 | 3,39 Gad1          | JUC0200004212.mm.1 | 7,43  | 0,000742 | 0,307808                     |      |
| TC0200001023.mm.1 | 3,39 Gad1          | JUC0200004199.mm.1 | 6,84  | 0,000301 | 0,288663                     |      |
| TC0200001023.mm.1 | 3,39 Gad1          | JUC0200004211.mm.1 | 6,29  | 0,003018 | 0,353447                     |      |
| TC0200001023.mm.1 | 3,39 Gad1          | JUC0200004208.mm.1 | 5,73  | 0,004031 | 0,361636                     |      |
| TC0200001023.mm.1 | 3,39 Gad1          | PSR0200008200.mm.1 | 5,04  | 0,000433 | 0,297771 Cassette Exon       | 0,47 |
| TC0200001023.mm.1 | 3,39 Gad1          | JUC0200004201.mm.1 | 4,57  | 0,000082 | 0,252815                     |      |
| TC0200001023.mm.1 | 3,39 Gad1          | PSR0200008201.mm.1 | 3,9   | 0,002109 | 0,342919 Cassette Exon       | 0,24 |
| TC0200001023.mm.1 | 3,39 Gad1          | PSR0200008205.mm.1 | 3,82  | 0,000331 | 0,28927 Cassette Exon        | 0,4  |
| TC0200001023.mm.1 | 3,39 Gad1          | JUC0200004213.mm.1 | 3,56  | 0,022178 | 0,485756                     |      |
| TC0200001023.mm.1 | 3,39 Gad1          | PSR0200008198.mm.1 | 3,55  | 0,000385 | 0,294337 Cassette Exon       | 0,35 |
| TC0200001023.mm.1 | 3,39 Gad1          | PSR0200008204.mm.1 | 3,42  | 0,000005 | 0,179072 Cassette Exon       | 0,47 |
| TC0200001023.mm.1 | 3,39 Gad1          | PSR0200008207.mm.1 | 3,21  | 0,000327 | 0,28927 Cassette Exon        | 0,19 |
| TC0200001023.mm.1 | 3,39 Gad1          | PSR0200008199.mm.1 | 3,09  | 0,00131  | 0,323877 Cassette Exon       | 0,46 |
| TC0200001023.mm.1 | 3,39 Gad1          | PSR0200008196.mm.1 | 2,98  | 0,010742 | 0,423772 Cassette Exon       | 0,11 |
| TC0200001023.mm.1 | 3,39 Gad1          | PSR0200008190.mm.1 | 2,84  | 0,004752 | 0,371039 Cassette Exon       | 0,34 |
| TC0200001023.mm.1 | 3,39 Gad1          | PSR0200008206.mm.1 | 2,5   | 0,000132 | 0,270905 Cassette Exon       | 0,15 |

|                   |      |      |                    |       |          |          |                     |      |
|-------------------|------|------|--------------------|-------|----------|----------|---------------------|------|
| TC0200001023.mm.1 | 3,39 | Gad1 | PSR0200008192.mm.1 | 2,1   | 0,006111 | 0,387239 | Mutually Exclusive  | 0,22 |
| TC0200001023.mm.1 | 3,39 | Gad1 | PSR0200008187.mm.1 | -2,42 | 0,007717 | 0,402552 | Cassette Exon       | 0,2  |
| TC0200001023.mm.1 | 3,39 | Gad1 | JUC0200004210.mm.1 | -2,79 | 0,006852 | 0,393893 |                     |      |
| TC0200001023.mm.1 | 3,39 | Gad1 | PSR0200008180.mm.1 | -2,96 | 0,014161 | 0,447466 | Cassette Exon       | 0,2  |
| TC0200001023.mm.1 | 3,39 | Gad1 | PSR0200008186.mm.1 | -2,97 | 0,038607 | 0,536883 | Cassette Exon       | 0,38 |
| TC0200001023.mm.1 | 3,39 | Gad1 | PSR0200008182.mm.1 | -3,38 | 0,019123 | 0,472425 | Cassette Exon       | 0,15 |
| TC0200001023.mm.1 | 3,39 | Gad1 | PSR0200008184.mm.1 | -3,65 | 0,04467  | 0,55216  | Cassette Exon       | 0,31 |
| TC0200001023.mm.1 | 3,39 | Gad1 | PSR0200008195.mm.1 | -3,75 | 0,007679 | 0,402502 | Alternative 5' Donc | 0,3  |
| TC0200001023.mm.1 | 3,39 | Gad1 | PSR0200008193.mm.1 | -4,29 | 0,032123 | 0,518586 | Mutually Exclusive  | 0,22 |
| TC0200001023.mm.1 | 3,39 | Gad1 | PSR0200008191.mm.1 | -4,6  | 0,002286 | 0,34605  | Alternative 5' Donc | 0,52 |
| TC0200001023.mm.1 | 3,39 | Gad1 | JUC0200004216.mm.1 | -5,31 | 0,037478 | 0,533968 |                     |      |
| TC0200001023.mm.1 | 3,39 | Gad1 | PSR0200008183.mm.1 | -6,48 | 0,008079 | 0,404784 | Cassette Exon       | 0,31 |
| TC0200001023.mm.1 | 3,39 | Gad1 | JUC0200004217.mm.1 | -7,2  | 0,006684 | 0,393187 |                     |      |
| TC0200001023.mm.1 | 3,39 | Gad1 | PSR0200008174.mm.1 | -8,49 | 0,006767 | 0,393343 | Cassette Exon       | 0,28 |
| TC1300001438.mm.1 | 1,59 | Ryr2 | JUC1300004723.mm.1 | 16,52 | 0,047861 | 0,559385 |                     |      |
| TC1300001438.mm.1 | 1,59 | Ryr2 | JUC1300004752.mm.1 | 7,73  | 0,04629  | 0,556186 |                     |      |
| TC1300001438.mm.1 | 1,59 | Ryr2 | JUC1300004696.mm.1 | 5,69  | 0,001001 | 0,316361 |                     |      |
| TC1300001438.mm.1 | 1,59 | Ryr2 | PSR1300009057.mm.1 | 4,39  | 0,000466 | 0,298999 | Cassette Exon       | 0,24 |
| TC1300001438.mm.1 | 1,59 | Ryr2 | JUC1300004710.mm.1 | 3,32  | 0,003379 | 0,354303 |                     |      |
| TC1300001438.mm.1 | 1,59 | Ryr2 | JUC1300004716.mm.1 | 3,19  | 0,01612  | 0,457756 |                     |      |
| TC1300001438.mm.1 | 1,59 | Ryr2 | JUC1300004726.mm.1 | 3,14  | 0,006717 | 0,393343 |                     |      |
| TC1300001438.mm.1 | 1,59 | Ryr2 | JUC1300004763.mm.1 | 2,97  | 0,000142 | 0,272178 |                     |      |
| TC1300001438.mm.1 | 1,59 | Ryr2 | JUC1300004750.mm.1 | 2,69  | 0,005315 | 0,378059 |                     |      |
| TC1300001438.mm.1 | 1,59 | Ryr2 | PSR1300009056.mm.1 | 2,67  | 0,006369 | 0,389488 | Cassette Exon       | 0,2  |
| TC1300001438.mm.1 | 1,59 | Ryr2 | PSR1300009073.mm.1 | 2,61  | 0,009231 | 0,414336 | Cassette Exon       | 0,15 |
| TC1300001438.mm.1 | 1,59 | Ryr2 | JUC1300004751.mm.1 | 2,54  | 0,028253 | 0,506565 |                     |      |
| TC1300001438.mm.1 | 1,59 | Ryr2 | JUC1300004742.mm.1 | 2,54  | 0,004655 | 0,370181 |                     |      |
| TC1300001438.mm.1 | 1,59 | Ryr2 | JUC1300004674.mm.1 | 2,45  | 0,025061 | 0,496166 |                     |      |
| TC1300001438.mm.1 | 1,59 | Ryr2 | JUC1300004686.mm.1 | 2,26  | 0,001459 | 0,328511 |                     |      |
| TC1300001438.mm.1 | 1,59 | Ryr2 | PSR1300009065.mm.1 | 2,23  | 0,044369 | 0,551441 | Cassette Exon       | 0,16 |
| TC1300001438.mm.1 | 1,59 | Ryr2 | PSR1300009092.mm.1 | 2,22  | 0,024556 | 0,494116 | Cassette Exon       | 0,16 |
| TC1300001438.mm.1 | 1,59 | Ryr2 | JUC1300004762.mm.1 | 2,07  | 0,002529 | 0,349501 |                     |      |
| TC1300001438.mm.1 | 1,59 | Ryr2 | PSR1300009027.mm.1 | 2,03  | 0,001886 | 0,338712 | Cassette Exon       | 0,15 |
| TC1300001438.mm.1 | 1,59 | Ryr2 | JUC1300004711.mm.1 | 2,03  | 0,003117 | 0,353892 |                     |      |
| TC1300001438.mm.1 | 1,59 | Ryr2 | JUC1300004777.mm.1 | -2,19 | 0,02706  | 0,502979 |                     |      |
| TC1300001438.mm.1 | 1,59 | Ryr2 | PSR1300009079.mm.1 | -2,44 | 0,001929 | 0,340171 | Cassette Exon       | 0,17 |
| TC1300001438.mm.1 | 1,59 | Ryr2 | JUC1300004673.mm.1 | -2,44 | 0,047272 | 0,558224 |                     |      |
| TC1300001438.mm.1 | 1,59 | Ryr2 | PSR1300009114.mm.1 | -2,81 | 0,013483 | 0,443132 | Cassette Exon       | 0,15 |
| TC1300001438.mm.1 | 1,59 | Ryr2 | PSR1300009080.mm.1 | -2,88 | 0,002253 | 0,34578  | Cassette Exon       | 0,17 |
| TC1300001438.mm.1 | 1,59 | Ryr2 | JUC1300004735.mm.1 | -3,02 | 0,006989 | 0,395722 |                     |      |
| TC1300001438.mm.1 | 1,59 | Ryr2 | JUC1300004684.mm.1 | -3,14 | 0,013768 | 0,444954 |                     |      |
| TC1300001438.mm.1 | 1,59 | Ryr2 | PSR1300009045.mm.1 | -3,27 | 0,018363 | 0,468484 | Cassette Exon       | 0,26 |
| TC1300001438.mm.1 | 1,59 | Ryr2 | JUC1300004715.mm.1 | -3,28 | 0,011942 | 0,431753 |                     |      |
| TC1300001438.mm.1 | 1,59 | Ryr2 | JUC1300004773.mm.1 | -4,26 | 0,003618 | 0,356223 |                     |      |
| TC1300001438.mm.1 | 1,59 | Ryr2 | JUC1300004772.mm.1 | -5,59 | 0,035739 | 0,529051 |                     |      |
| TC1400000281.mm.1 | 2,63 | Erc2 | JUC1400001370.mm.1 | 16,51 | 0,002482 | 0,349135 |                     |      |
| TC1400000281.mm.1 | 2,63 | Erc2 | JUC1400001371.mm.1 | 3,35  | 0,007258 | 0,39826  |                     |      |
| TC1400000281.mm.1 | 2,63 | Erc2 | JUC1400001364.mm.1 | 2,01  | 0,020755 | 0,479262 |                     |      |

|                   |       |          |                    |       |          |          |                     |      |
|-------------------|-------|----------|--------------------|-------|----------|----------|---------------------|------|
| TC1400000281.mm.1 | 2,63  | Erc2     | PSR1400002308.mm.1 | -2,18 | 0,031472 | 0,516922 | Cassette Exon       | 0,15 |
| TC1400000281.mm.1 | 2,63  | Erc2     | JUC1400001375.mm.1 | -2,36 | 0,043762 | 0,55037  |                     |      |
| TC1400000281.mm.1 | 2,63  | Erc2     | JUC1400001382.mm.1 | -2,69 | 0,003541 | 0,3562   |                     |      |
| TC1400000281.mm.1 | 2,63  | Erc2     | PSR1400002311.mm.1 | -2,7  | 0,036179 | 0,529944 | Alternative 5' Donc | 0,31 |
| TC1400000281.mm.1 | 2,63  | Erc2     | JUC1400001386.mm.1 | -2,92 | 0,000805 | 0,311765 |                     |      |
| TC1400000281.mm.1 | 2,63  | Erc2     | PSR1400002306.mm.1 | -4,07 | 0,0377   | 0,534513 | Cassette Exon       | 0,34 |
| TC0600001271.mm.1 | -1,22 | Atg7     | PSR0600010028.mm.1 | 16,15 | 0,00291  | 0,352289 | Alternative 5' Donc | 0,48 |
| TC1100001634.mm.1 | 1,37  | Atp6v0a1 | JUC1100007879.mm.1 | 16,03 | 0,002528 | 0,349501 |                     |      |
| TC1100001634.mm.1 | 1,37  | Atp6v0a1 | JUC1100007880.mm.1 | 5,65  | 0,011529 | 0,428455 |                     |      |
| TC1100001634.mm.1 | 1,37  | Atp6v0a1 | JUC1100007882.mm.1 | -2,04 | 0,01901  | 0,471738 |                     |      |
| TC1100001634.mm.1 | 1,37  | Atp6v0a1 | PSR1100015173.mm.1 | -2,38 | 0,028077 | 0,506011 | Alternative 3' Acce | 0,23 |
| TC0X00003429.mm.1 | -1,79 | L1cam    | JUC0X00007735.mm.1 | 15,84 | 0,002127 | 0,342919 |                     |      |
| TC0X00003429.mm.1 | -1,79 | L1cam    | JUC0X00007734.mm.1 | 9,59  | 0,002214 | 0,34564  |                     |      |
| TC0X00003429.mm.1 | -1,79 | L1cam    | JUC0X00007733.mm.1 | 3,52  | 0,009283 | 0,414799 |                     |      |
| TC1400001643.mm.1 | 1,86  | Cacna2d3 | PSR1400012365.mm.1 | 15,83 | 0,000902 | 0,313363 | Cassette Exon       | 0,29 |
| TC1400001643.mm.1 | 1,86  | Cacna2d3 | PSR1400012359.mm.1 | 5,78  | 0,004883 | 0,372195 | Cassette Exon       | 0,44 |
| TC1400001643.mm.1 | 1,86  | Cacna2d3 | PSR1400012367.mm.1 | 5,68  | 0,009543 | 0,416659 | Cassette Exon       | 0,3  |
| TC1400001643.mm.1 | 1,86  | Cacna2d3 | PSR1400012366.mm.1 | 5,13  | 0,001384 | 0,3259   | Cassette Exon       | 0,3  |
| TC1400001643.mm.1 | 1,86  | Cacna2d3 | PSR1400012364.mm.1 | 4,46  | 0,009748 | 0,417839 | Cassette Exon       | 0,41 |
| TC1400001643.mm.1 | 1,86  | Cacna2d3 | JUC1400006675.mm.1 | 4,18  | 0,001513 | 0,330268 |                     |      |
| TC1400001643.mm.1 | 1,86  | Cacna2d3 | PSR1400012363.mm.1 | 3,67  | 0,004966 | 0,373851 | Cassette Exon       | 0,39 |
| TC1400001643.mm.1 | 1,86  | Cacna2d3 | PSR1400012362.mm.1 | 3,61  | 0,003158 | 0,353892 | Cassette Exon       | 0,31 |
| TC1400001643.mm.1 | 1,86  | Cacna2d3 | JUC1400006673.mm.1 | 2,85  | 0,029623 | 0,510558 |                     |      |
| TC1400001643.mm.1 | 1,86  | Cacna2d3 | PSR1400012357.mm.1 | 2,71  | 0,007135 | 0,397369 | Alternative 3' Acce | 0,19 |
| TC1400001643.mm.1 | 1,86  | Cacna2d3 | JUC1400006672.mm.1 | 2,69  | 0,013221 | 0,44107  |                     |      |
| TC1400001643.mm.1 | 1,86  | Cacna2d3 | JUC1400006709.mm.1 | 2,05  | 0,021414 | 0,482126 |                     |      |
| TC1400001643.mm.1 | 1,86  | Cacna2d3 | PSR1400012387.mm.1 | -2,02 | 0,01159  | 0,429241 | Cassette Exon       | 0,1  |
| TC1400001643.mm.1 | 1,86  | Cacna2d3 | PSR1400012400.mm.1 | -2,24 | 0,016931 | 0,4609   | Cassette Exon       | 0,12 |
| TC1400001643.mm.1 | 1,86  | Cacna2d3 | PSR1400012374.mm.1 | -2,3  | 0,0002   | 0,28803  | Cassette Exon       | 0,11 |
| TC1400001643.mm.1 | 1,86  | Cacna2d3 | JUC1400006706.mm.1 | -2,35 | 0,020423 | 0,477971 |                     |      |
| TC1400001643.mm.1 | 1,86  | Cacna2d3 | PSR1400012373.mm.1 | -2,4  | 0,035985 | 0,529491 | Cassette Exon       | 0,13 |
| TC1400001643.mm.1 | 1,86  | Cacna2d3 | PSR1400012398.mm.1 | -2,56 | 0,022901 | 0,488524 | Alternative 3' Acce | 0,11 |
| TC1400001643.mm.1 | 1,86  | Cacna2d3 | PSR1400012372.mm.1 | -2,58 | 0,001235 | 0,322251 | Cassette Exon       | 0,16 |
| TC1400001643.mm.1 | 1,86  | Cacna2d3 | PSR1400012371.mm.1 | -2,94 | 0,006582 | 0,39213  | Cassette Exon       | 0,21 |
| TC1400001643.mm.1 | 1,86  | Cacna2d3 | PSR1400012375.mm.1 | -3,03 | 0,007182 | 0,397855 | Cassette Exon       | 0,18 |
| TC0500003182.mm.1 | 2,33  | Rph3a    | JUC0500015416.mm.1 | 15,69 | 0,009248 | 0,414515 |                     |      |
| TC0500003182.mm.1 | 2,33  | Rph3a    | JUC0500015411.mm.1 | 8,1   | 0,041405 | 0,544627 |                     |      |
| TC0500003182.mm.1 | 2,33  | Rph3a    | PSR0500028284.mm.1 | 6,9   | 0,028458 | 0,507299 | Cassette Exon       | 0,28 |
| TC0500003182.mm.1 | 2,33  | Rph3a    | JUC0500015410.mm.1 | 5,19  | 0,006225 | 0,387962 |                     |      |
| TC0500003182.mm.1 | 2,33  | Rph3a    | PSR0500028286.mm.1 | 3,56  | 0,004302 | 0,364072 | Cassette Exon       | 0,24 |
| TC0500003182.mm.1 | 2,33  | Rph3a    | JUC0500015414.mm.1 | 3,03  | 0,00855  | 0,408183 |                     |      |
| TC0500003182.mm.1 | 2,33  | Rph3a    | PSR0500028304.mm.1 | 2,62  | 0,00314  | 0,353892 | Cassette Exon       | 0,23 |
| TC0500003182.mm.1 | 2,33  | Rph3a    | PSR0500028307.mm.1 | -2,24 | 0,035793 | 0,529153 | Cassette Exon       | 0,1  |
| TC0500003182.mm.1 | 2,33  | Rph3a    | JUC0500015407.mm.1 | -2,47 | 0,016093 | 0,45756  |                     |      |
| TC0500003182.mm.1 | 2,33  | Rph3a    | JUC0500015399.mm.1 | -2,64 | 0,010425 | 0,421539 |                     |      |
| TC0500003182.mm.1 | 2,33  | Rph3a    | JUC0500015413.mm.1 | -3,83 | 0,049797 | 0,563698 |                     |      |
| TC0500003182.mm.1 | 2,33  | Rph3a    | PSR0500028298.mm.1 | -4,27 | 0,023257 | 0,490032 | Cassette Exon       | 0,28 |
| TC0500003182.mm.1 | 2,33  | Rph3a    | PSR0500028296.mm.1 | -4,96 | 0,017061 | 0,461973 | Cassette Exon       | 0,34 |

|                   |                     |                    |       |          |          |                          |
|-------------------|---------------------|--------------------|-------|----------|----------|--------------------------|
| TC0200002130.mm.1 | 1,9 Pcsk2           | JUC0200008473.mm.1 | 15,36 | 0,002563 | 0,349501 |                          |
| TC0200002130.mm.1 | 1,9 Pcsk2           | JUC0200008478.mm.1 | 6,04  | 0,006337 | 0,389463 |                          |
| TC0200002130.mm.1 | 1,9 Pcsk2           | PSR0200016814.mm.1 | 2,82  | 0,001127 | 0,317328 | Cassette Exon 0,21       |
| TC0200002130.mm.1 | 1,9 Pcsk2           | PSR0200016815.mm.1 | 2,69  | 0,006019 | 0,386586 | Cassette Exon 0,23       |
| TC0200002130.mm.1 | 1,9 Pcsk2           | PSR0200016823.mm.1 | -2,04 | 0,002316 | 0,346468 | Cassette Exon 0,1        |
| TC0200002130.mm.1 | 1,9 Pcsk2           | PSR0200016806.mm.1 | -2,57 | 0,012724 | 0,436578 | Alternative 3' Acce 0,29 |
| TC0200002130.mm.1 | 1,9 Pcsk2           | PSR0200016805.mm.1 | -3,05 | 0,002279 | 0,345991 | Alternative 3' Acce 0,29 |
| TC0200002130.mm.1 | 1,9 Pcsk2           | PSR0200016810.mm.1 | -3,28 | 0,007466 | 0,400381 |                          |
| TC0400004035.mm.1 | 1,93 Kif1b          | JUC0400017464.mm.1 | 15,33 | 0,000877 | 0,311909 |                          |
| TC0400004035.mm.1 | 1,93 Kif1b          | JUC0400017463.mm.1 | 13    | 0,002019 | 0,34123  |                          |
| TC0400004035.mm.1 | 1,93 Kif1b          | JUC0400017473.mm.1 | 5,4   | 0,007219 | 0,39826  |                          |
| TC0400004035.mm.1 | 1,93 Kif1b          | JUC0400017474.mm.1 | 4,45  | 0,047738 | 0,559019 |                          |
| TC0400004035.mm.1 | 1,93 Kif1b          | JUC0400017472.mm.1 | 3,01  | 0,040352 | 0,541949 |                          |
| TC0400004035.mm.1 | 1,93 Kif1b          | PSR0400033487.mm.1 | 2,53  | 0,002017 | 0,34123  | Alternative 5' Donc 0,17 |
| TC0400004035.mm.1 | 1,93 Kif1b          | PSR0400033488.mm.1 | -2,27 | 0,023598 | 0,490995 | Cassette Exon 0,24       |
| TC0400004035.mm.1 | 1,93 Kif1b          | PSR0400033492.mm.1 | -2,27 | 0,032284 | 0,519116 | Alternative 3' Acce 0,18 |
| TC0400004035.mm.1 | 1,93 Kif1b          | PSR0400033483.mm.1 | -2,29 | 0,026471 | 0,501252 | Alternative 5' Donc 0,18 |
| TC0400004035.mm.1 | 1,93 Kif1b          | PSR0400033505.mm.1 | -2,36 | 0,017265 | 0,462888 | Alternative 5' Donc 0,21 |
| TC0400004035.mm.1 | 1,93 Kif1b          | PSR0400033476.mm.1 | -2,65 | 0,001921 | 0,34017  | Cassette Exon 0,31       |
| TC0400004035.mm.1 | 1,93 Kif1b          | PSR0400033474.mm.1 | -2,7  | 0,00723  | 0,39826  | Cassette Exon 0,31       |
| TC0400004035.mm.1 | 1,93 Kif1b          | JUC0400017476.mm.1 | -3,04 | 0,029836 | 0,511132 |                          |
| TC0400004035.mm.1 | 1,93 Kif1b          | PSR0400033475.mm.1 | -3,36 | 0,005307 | 0,378059 | Cassette Exon 0,31       |
| TC0400004035.mm.1 | 1,93 Kif1b          | PSR0400033463.mm.1 | -3,83 | 0,005566 | 0,380931 | Alternative 5' Donc 0,42 |
| TC0400004035.mm.1 | 1,93 Kif1b          | JUC0400017477.mm.1 | -3,92 | 0,002723 | 0,349612 |                          |
| TC0400004035.mm.1 | 1,93 Kif1b          | JUC0400017460.mm.1 | -5,84 | 0,018289 | 0,468049 |                          |
| TC0900000948.mm.1 | -1,62               | JUC0900003964.mm.1 | 14,76 | 0,021631 | 0,483559 |                          |
| TC0X00001873.mm.1 | 1,04 Cask           | JUC0X00006080.mm.1 | 14,6  | 0,001903 | 0,338712 |                          |
| TC0X00001873.mm.1 | 1,04 Cask           | JUC0X00006078.mm.1 | 5,11  | 0,010184 | 0,419711 |                          |
| TC0X00001873.mm.1 | 1,04 Cask           | JUC0X00006075.mm.1 | 2,71  | 0,028593 | 0,507685 |                          |
| TC0700003359.mm.1 | -1,2                | JUC0700015203.mm.1 | 14,26 | 0,012261 | 0,433888 |                          |
| TC1800000179.mm.1 | -1,14 Dtna; Gm19389 | JUC1800000746.mm.1 | 14,23 | 0,001427 | 0,327447 |                          |
| TC1800000179.mm.1 | -1,14 Dtna; Gm19389 | JUC1800000747.mm.1 | 6,69  | 0,004779 | 0,371044 |                          |
| TC1800000179.mm.1 | -1,14 Dtna; Gm19389 | JUC1800000741.mm.1 | 2,61  | 0,037812 | 0,534771 |                          |
| TC1800000179.mm.1 | -1,14 Dtna; Gm19389 | JUC1800000737.mm.1 | 2,24  | 0,02684  | 0,502454 |                          |
| TC1800000179.mm.1 | -1,14 Dtna; Gm19389 | PSR1800001261.mm.1 | 2,07  | 0,003136 | 0,353892 | Cassette Exon 0,02       |
| TC1900000777.mm.1 | 1,21 Vti1a          | JUC1900003734.mm.1 | 14,04 | 0,010552 | 0,422341 |                          |
| TC1900000777.mm.1 | 1,21 Vti1a          | PSR1900006860.mm.1 | -2,48 | 0,000548 | 0,304044 | Cassette Exon 0,14       |
| TC1100001135.mm.1 | 2,75 Sez6           | PSR1100010404.mm.1 | 13,93 | 0,000685 | 0,304511 | Cassette Exon 0,4        |
| TC1100001135.mm.1 | 2,75 Sez6           | JUC1100005470.mm.1 | 4,15  | 0,000287 | 0,28803  |                          |
| TC1100001135.mm.1 | 2,75 Sez6           | JUC1100005456.mm.1 | 3,31  | 0,022348 | 0,486348 |                          |
| TC1100001135.mm.1 | 2,75 Sez6           | PSR1100010406.mm.1 | 2,76  | 0,000231 | 0,28803  | Cassette Exon 0,29       |
| TC1100001135.mm.1 | 2,75 Sez6           | PSR1100010399.mm.1 | 2,58  | 0,008053 | 0,404416 | Cassette Exon 0,17       |
| TC1100001135.mm.1 | 2,75 Sez6           | JUC1100005469.mm.1 | 2,47  | 0,038179 | 0,535805 |                          |
| TC1100001135.mm.1 | 2,75 Sez6           | JUC1100005468.mm.1 | 2,19  | 0,017089 | 0,462202 |                          |
| TC1100001135.mm.1 | 2,75 Sez6           | PSR1100010394.mm.1 | -2,02 | 0,010819 | 0,424068 | Cassette Exon 0,13       |
| TC1100001135.mm.1 | 2,75 Sez6           | PSR1100010396.mm.1 | -2,07 | 0,017247 | 0,462729 | Cassette Exon 0,11       |
| TC1100001135.mm.1 | 2,75 Sez6           | PSR1100010386.mm.1 | -2,25 | 0,040081 | 0,541392 | Alternative 5' Donc 0,21 |
| TC1100001135.mm.1 | 2,75 Sez6           | PSR1100010411.mm.1 | -2,31 | 0,007258 | 0,39826  | Alternative 5' Donc 0,23 |

|                   |            |                    |       |          |                              |      |
|-------------------|------------|--------------------|-------|----------|------------------------------|------|
| TC1100001135.mm.1 | 2,75 Sez6  | PSR1100010390.mm.1 | -2,74 | 0,000543 | 0,304044 Alternative 3' Acce | 0,21 |
| TC1100001135.mm.1 | 2,75 Sez6  | PSR1100010378.mm.1 | -3,01 | 0,001473 | 0,329052 Cassette Exon       | 0,19 |
| TC1100001135.mm.1 | 2,75 Sez6  | PSR1100010395.mm.1 | -3,83 | 0,000554 | 0,304044 Intron Retention    | 0,45 |
| TC1100001135.mm.1 | 2,75 Sez6  | PSR1100010392.mm.1 | -3,84 | 0,002576 | 0,349501 Alternative 3' Acce | 0,54 |
| TC1100001135.mm.1 | 2,75 Sez6  | JUC1100005460.mm.1 | -3,97 | 0,000419 | 0,297771                     |      |
| TC1100001135.mm.1 | 2,75 Sez6  | PSR1100010373.mm.1 | -4,65 | 0,021046 | 0,480262 Alternative 3' Acce | 0,27 |
| TC1100001135.mm.1 | 2,75 Sez6  | JUC1100005465.mm.1 | -4,71 | 0,000216 | 0,28803                      |      |
| TC0600000998.mm.1 | 1,45 Aak1  | JUC0600003976.mm.1 | 13,84 | 0,001471 | 0,329052                     |      |
| TC0600000998.mm.1 | 1,45 Aak1  | JUC0600003977.mm.1 | 7,46  | 0,009627 | 0,417315                     |      |
| TC0600000998.mm.1 | 1,45 Aak1  | JUC0600003974.mm.1 | 6,04  | 0,003344 | 0,354243                     |      |
| TC0600000998.mm.1 | 1,45 Aak1  | JUC0600003975.mm.1 | 4,54  | 0,004857 | 0,37168                      |      |
| TC0600000998.mm.1 | 1,45 Aak1  | PSR0600007804.mm.1 | 4,5   | 0,014766 | 0,450801 Alternative 3' Acce | 0,2  |
| TC0600000998.mm.1 | 1,45 Aak1  | PSR0600007802.mm.1 | 3,72  | 0,000306 | 0,288663 Cassette Exon       | 0,49 |
| TC0600000998.mm.1 | 1,45 Aak1  | JUC0600003978.mm.1 | 3,37  | 0,017209 | 0,462496                     |      |
| TC0600000998.mm.1 | 1,45 Aak1  | PSR0600007798.mm.1 | 2,55  | 0,018031 | 0,467048 Cassette Exon       | 0,41 |
| TC0600000998.mm.1 | 1,45 Aak1  | PSR0600007799.mm.1 | 2,54  | 0,048527 | 0,560991 Cassette Exon       | 0,41 |
| TC0600000998.mm.1 | 1,45 Aak1  | PSR0600007800.mm.1 | 2,42  | 0,015269 | 0,452983 Cassette Exon       | 0,4  |
| TC0600000998.mm.1 | 1,45 Aak1  | JUC0600003973.mm.1 | 2,34  | 0,041805 | 0,545586                     |      |
| TC0600000998.mm.1 | 1,45 Aak1  | PSR0600007793.mm.1 | -2,66 | 0,010239 | 0,420146 Cassette Exon       | 0,18 |
| TC0600000998.mm.1 | 1,45 Aak1  | JUC0600003969.mm.1 | -2,72 | 0,035471 | 0,528724                     |      |
| TC0300001080.mm.1 | 1,07 Ppm1j | JUC0300004526.mm.1 | 13,61 | 0,036348 | 0,530573                     |      |
| TC1100000549.mm.1 | 3,34 Grm6  | JUC1100002234.mm.1 | 13,54 | 0,000181 | 0,283791                     |      |
| TC1100000549.mm.1 | 3,34 Grm6  | PSR1100004286.mm.1 | 6,48  | 0,017729 | 0,465216 Cassette Exon       | 0,4  |
| TC1100000549.mm.1 | 3,34 Grm6  | JUC1100002237.mm.1 | 4,22  | 0,001583 | 0,331726                     |      |
| TC1100000549.mm.1 | 3,34 Grm6  | PSR1100004282.mm.1 | 3,16  | 0,020012 | 0,47638 Cassette Exon        | 0,23 |
| TC1100000549.mm.1 | 3,34 Grm6  | PSR1100004279.mm.1 | 3,15  | 0,001375 | 0,32572 Cassette Exon        | 0,2  |
| TC1100000549.mm.1 | 3,34 Grm6  | PSR1100004273.mm.1 | -2,84 | 0,004454 | 0,367239 Cassette Exon       | 0,3  |
| TC1100000549.mm.1 | 3,34 Grm6  | PSR1100004275.mm.1 | -2,88 | 0,004777 | 0,371044 Cassette Exon       | 0,3  |
| TC1100000549.mm.1 | 3,34 Grm6  | JUC1100002240.mm.1 | -3,37 | 0,024289 | 0,49362                      |      |
| TC1100000549.mm.1 | 3,34 Grm6  | PSR1100004281.mm.1 | -3,61 | 0,000078 | 0,25272 Alternative 3' Acce  | 0,55 |
| TC1100000549.mm.1 | 3,34 Grm6  | PSR1100004283.mm.1 | -3,63 | 0,007007 | 0,395737 Alternative 3' Acce | 0,56 |
| TC1100000549.mm.1 | 3,34 Grm6  | JUC1100002230.mm.1 | -5,5  | 0,002789 | 0,351436                     |      |
| TC0200003674.mm.1 | 2,28 Scn1a | JUC0200015929.mm.1 | 13,4  | 0,000154 | 0,272178                     |      |
| TC0200003674.mm.1 | 2,28 Scn1a | JUC0200015954.mm.1 | 5     | 0,01419  | 0,447608                     |      |
| TC0200003674.mm.1 | 2,28 Scn1a | PSR0200031329.mm.1 | 4,48  | 0,000489 | 0,298999 Cassette Exon       | 0,38 |
| TC0200003674.mm.1 | 2,28 Scn1a | JUC0200015926.mm.1 | 3,25  | 0,024988 | 0,496025                     |      |
| TC0200003674.mm.1 | 2,28 Scn1a | JUC0200015946.mm.1 | 3,23  | 0,01595  | 0,456846                     |      |
| TC0200003674.mm.1 | 2,28 Scn1a | JUC0200015925.mm.1 | 2,74  | 0,010531 | 0,42227                      |      |
| TC0200003674.mm.1 | 2,28 Scn1a | PSR0200031324.mm.1 | 2,68  | 0,00226  | 0,34578 Alternative 3' Acce  | 0,27 |
| TC0200003674.mm.1 | 2,28 Scn1a | JUC0200015928.mm.1 | 2,64  | 0,018744 | 0,470733                     |      |
| TC0200003674.mm.1 | 2,28 Scn1a | JUC0200015948.mm.1 | 2,55  | 0,021719 | 0,484104                     |      |
| TC0200003674.mm.1 | 2,28 Scn1a | PSR0200031332.mm.1 | 2,31  | 0,034904 | 0,52699 Cassette Exon        | 0,06 |
| TC0200003674.mm.1 | 2,28 Scn1a | PSR0200031337.mm.1 | 2,16  | 0,044064 | 0,55088 Alternative 5' Donc  | 0,05 |
| TC0200003674.mm.1 | 2,28 Scn1a | PSR0200031328.mm.1 | 2,08  | 0,006345 | 0,389463 Cassette Exon       | 0,23 |
| TC0200003674.mm.1 | 2,28 Scn1a | PSR0200031356.mm.1 | -2,08 | 0,009845 | 0,417839 Cassette Exon       | 0,03 |
| TC0200003674.mm.1 | 2,28 Scn1a | PSR0200031340.mm.1 | -2,18 | 0,01619  | 0,45809 Cassette Exon        | 0,17 |
| TC0200003674.mm.1 | 2,28 Scn1a | PSR0200031335.mm.1 | -2,18 | 0,009511 | 0,416602 Cassette Exon       | 0,13 |
| TC0200003674.mm.1 | 2,28 Scn1a | PSR0200031342.mm.1 | -2,35 | 0,008144 | 0,405416 Alternative 3' Acce | 0,23 |

|                   |                                 |                    |       |          |                              |      |
|-------------------|---------------------------------|--------------------|-------|----------|------------------------------|------|
| TC0200003674.mm.1 | 2,28 Scn1a                      | PSR0200031344.mm.1 | -2,4  | 0,007118 | 0,397044 Cassette Exon       | 0,15 |
| TC0200003674.mm.1 | 2,28 Scn1a                      | JUC0200015947.mm.1 | -2,45 | 0,038514 | 0,536557                     |      |
| TC0200003674.mm.1 | 2,28 Scn1a                      | PSR0200031345.mm.1 | -2,51 | 0,044296 | 0,551351 Cassette Exon       | 0,25 |
| TC0200003674.mm.1 | 2,28 Scn1a                      | PSR0200031353.mm.1 | -2,75 | 0,000134 | 0,270905 Cassette Exon       | 0,13 |
| TC0200003674.mm.1 | 2,28 Scn1a                      | JUC0200015930.mm.1 | -2,93 | 0,00237  | 0,34829                      |      |
| TC0200003674.mm.1 | 2,28 Scn1a                      | PSR0200031360.mm.1 | -3,03 | 0,010031 | 0,41878 Alternative 5' Donc  | 0,3  |
| TC0200003674.mm.1 | 2,28 Scn1a                      | JUC0200015941.mm.1 | -3,03 | 0,011384 | 0,427549                     |      |
| TC0700003387.mm.1 | 1,58 A330076H08Rik; Mir344g     | PSR0700028940.mm.1 | 12,77 | 0,042819 | 0,548097                     |      |
| TC0700003387.mm.1 | 1,58 A330076H08Rik; Mir344g     | PSR0700028941.mm.1 | 6,76  | 0,008126 | 0,405267 Alternative 3' Acce | 0,37 |
| TC0700003387.mm.1 | 1,58 A330076H08Rik; Mir344g     | PSR0700028939.mm.1 | 4,62  | 0,001822 | 0,336896                     |      |
| TC0700003387.mm.1 | 1,58 A330076H08Rik; Mir344g     | PSR0700028946.mm.1 | 4,53  | 0,004387 | 0,366156 Alternative 3' Acce | 0,25 |
| TC0700003387.mm.1 | 1,58 A330076H08Rik; Mir344g     | PSR0700028944.mm.1 | 4,13  | 0,004235 | 0,363295 Alternative 5' Donc | 0,33 |
| TC0700003387.mm.1 | 1,58 A330076H08Rik; Mir344g     | PSR0700028938.mm.1 | 3,68  | 0,004717 | 0,370888                     |      |
| TC0700003387.mm.1 | 1,58 A330076H08Rik; Mir344g     | PSR0700028945.mm.1 | 3,6   | 0,005745 | 0,382993 Alternative 5' Donc | 0,33 |
| TC0700003387.mm.1 | 1,58 A330076H08Rik; Mir344g     | PSR0700028947.mm.1 | 2,45  | 0,018899 | 0,47127 Alternative 3' Acce  | 0,09 |
| TC0100000706.mm.1 | -1,18 Col4a3                    | JUC0100003469.mm.1 | 12,73 | 0,008089 | 0,405012                     |      |
| TC0100000706.mm.1 | -1,18 Col4a3                    | PSR0100006007.mm.1 | 2,1   | 0,023758 | 0,491689 Cassette Exon       | 0,09 |
| TC1900000119.mm.1 | 2,02 Nrnx2                      | JUC1900000847.mm.1 | 12,71 | 0,000151 | 0,272178                     |      |
| TC1900000119.mm.1 | 2,02 Nrnx2                      | JUC1900000853.mm.1 | 6,31  | 0,009411 | 0,415853                     |      |
| TC1900000119.mm.1 | 2,02 Nrnx2                      | PSR1900001657.mm.1 | 4,6   | 0,013027 | 0,439354 Alternative 5' Donc | 0,45 |
| TC1900000119.mm.1 | 2,02 Nrnx2                      | JUC1900000851.mm.1 | 4,37  | 0,004892 | 0,372195                     |      |
| TC1900000119.mm.1 | 2,02 Nrnx2                      | PSR1900001634.mm.1 | 3,8   | 0,000268 | 0,28803 Alternative 5' Donc  | 0,45 |
| TC1900000119.mm.1 | 2,02 Nrnx2                      | JUC1900000848.mm.1 | 2,73  | 0,000105 | 0,264747                     |      |
| TC1900000119.mm.1 | 2,02 Nrnx2                      | JUC1900000850.mm.1 | 2,17  | 0,016082 | 0,457504                     |      |
| TC1900000119.mm.1 | 2,02 Nrnx2                      | PSR1900001638.mm.1 | -2,02 | 0,016402 | 0,458894 Cassette Exon       | 0,16 |
| TC1900000119.mm.1 | 2,02 Nrnx2                      | PSR1900001640.mm.1 | -2,04 | 0,012085 | 0,43255 Cassette Exon        | 0,09 |
| TC1900000119.mm.1 | 2,02 Nrnx2                      | PSR1900001652.mm.1 | -2,04 | 0,047855 | 0,559373 Alternative 3' Acce | 0,09 |
| TC1900000119.mm.1 | 2,02 Nrnx2                      | JUC1900000856.mm.1 | -2,06 | 0,022184 | 0,485756                     |      |
| TC1900000119.mm.1 | 2,02 Nrnx2                      | PSR1900001627.mm.1 | -2,08 | 0,049853 | 0,563773                     |      |
| TC1900000119.mm.1 | 2,02 Nrnx2                      | JUC1900000838.mm.1 | -2,12 | 0,000694 | 0,305213                     |      |
| TC1900000119.mm.1 | 2,02 Nrnx2                      | JUC1900000835.mm.1 | -2,56 | 0,043904 | 0,550652                     |      |
| TC1900000119.mm.1 | 2,02 Nrnx2                      | PSR1900001660.mm.1 | -2,67 | 0,005049 | 0,374728 Cassette Exon       | 0,14 |
| TC1900000119.mm.1 | 2,02 Nrnx2                      | PSR1900001662.mm.1 | -2,97 | 0,014074 | 0,446841 Alternative 3' Acce | 0,28 |
| TC1900000119.mm.1 | 2,02 Nrnx2                      | JUC1900000846.mm.1 | -2,99 | 0,000629 | 0,304044                     |      |
| TC1900000119.mm.1 | 2,02 Nrnx2                      | PSR1900001650.mm.1 | -3,02 | 0,028829 | 0,508414 Alternative 3' Acce | 0,16 |
| TC1900000119.mm.1 | 2,02 Nrnx2                      | PSR1900001617.mm.1 | -3,04 | 0,021226 | 0,481319 Alternative 3' Acce | 0,28 |
| TC1900000119.mm.1 | 2,02 Nrnx2                      | PSR1900001615.mm.1 | -3,37 | 0,024247 | 0,493309 Cassette Exon       | 0,22 |
| TC1900000119.mm.1 | 2,02 Nrnx2                      | JUC1900000864.mm.1 | -3,61 | 0,016713 | 0,460199                     |      |
| TC1900000119.mm.1 | 2,02 Nrnx2                      | PSR1900001624.mm.1 | -3,92 | 0,011542 | 0,428761 Cassette Exon       | 0,09 |
| TC1900000119.mm.1 | 2,02 Nrnx2                      | JUC1900000859.mm.1 | -4,41 | 0,006581 | 0,39213                      |      |
| TC0800000472.mm.1 | 2,1 Micu3                       | JUC0800001732.mm.1 | 12,63 | 0,009838 | 0,417839                     |      |
| TC0800000472.mm.1 | 2,1 Micu3                       | PSR0800003224.mm.1 | -2,17 | 0,039616 | 0,540026 Cassette Exon       | 0,09 |
| TC1000000517.mm.1 | 1,35 Ranbp2                     | JUC1000001888.mm.1 | 12,57 | 0,004191 | 0,362939                     |      |
| TC0300000934.mm.1 | -1,25 Hist2h3b; Hist1h3e; Hist1 | PSR0300007468.mm.1 | 12,48 | 0,003408 | 0,355204 Alternative 3' Acce | 0,48 |
| TC0200003142.mm.1 | 2,24 Grin1                      | JUC0200013102.mm.1 | 12,47 | 0,012337 | 0,434446                     |      |
| TC0200003142.mm.1 | 2,24 Grin1                      | JUC0200013101.mm.1 | 5,37  | 0,000696 | 0,305429                     |      |
| TC0200003142.mm.1 | 2,24 Grin1                      | JUC0200013088.mm.1 | 3,2   | 0,010841 | 0,424161                     |      |
| TC0200003142.mm.1 | 2,24 Grin1                      | PSR0200025921.mm.1 | 3,16  | 0,042237 | 0,547034 Cassette Exon       | 0,47 |



|                   |       |        |                    |       |          |          |                     |      |
|-------------------|-------|--------|--------------------|-------|----------|----------|---------------------|------|
| TC0200003142.mm.1 | 2,24  | Grin1  | JUC0200013104.mm.1 | 2,62  | 0,033723 | 0,523549 |                     |      |
| TC0200003142.mm.1 | 2,24  | Grin1  | PSR0200025891.mm.1 | -2,04 | 0,002651 | 0,349612 | Cassette Exon       | 0,08 |
| TC0200003142.mm.1 | 2,24  | Grin1  | PSR0200025920.mm.1 | -2,2  | 0,038845 | 0,537797 | Alternative 3' Acce | 0,33 |
| TC0200003142.mm.1 | 2,24  | Grin1  | PSR0200025916.mm.1 | -2,31 | 0,003456 | 0,355628 | Alternative 3' Acce | 0,14 |
| TC0200003142.mm.1 | 2,24  | Grin1  | JUC0200013090.mm.1 | -2,35 | 0,025131 | 0,496397 |                     |      |
| TC0200003142.mm.1 | 2,24  | Grin1  | PSR0200025884.mm.1 | -2,46 | 0,003213 | 0,354243 | Alternative 3' Acce | 0,21 |
| TC0200003142.mm.1 | 2,24  | Grin1  | JUC0200013100.mm.1 | -2,56 | 0,008827 | 0,410293 |                     |      |
| TC0200003142.mm.1 | 2,24  | Grin1  | PSR0200025889.mm.1 | -2,58 | 0,000827 | 0,311886 | Alternative 5' Donc | 0,31 |
| TC0200003142.mm.1 | 2,24  | Grin1  | JUC0200013096.mm.1 | -2,6  | 0,045703 | 0,554833 |                     |      |
| TC0200003142.mm.1 | 2,24  | Grin1  | PSR0200025886.mm.1 | -2,74 | 0,003932 | 0,359818 | Alternative 5' Donc | 0,27 |
| TC0200003142.mm.1 | 2,24  | Grin1  | PSR0200025912.mm.1 | -3,24 | 0,008764 | 0,409781 | Intron Retention    | 0,45 |
| TC0200003142.mm.1 | 2,24  | Grin1  | JUC0200013108.mm.1 | -3,26 | 0,022107 | 0,485497 |                     |      |
| TC0200003142.mm.1 | 2,24  | Grin1  | PSR0200025904.mm.1 | -3,33 | 0,007419 | 0,399901 | Alternative 3' Acce | 0,25 |
| TC0200003142.mm.1 | 2,24  | Grin1  | JUC0200013110.mm.1 | -3,42 | 0,022414 | 0,486711 |                     |      |
| TC0200003142.mm.1 | 2,24  | Grin1  | JUC0200013094.mm.1 | -3,59 | 0,000495 | 0,299933 |                     |      |
| TC0200003142.mm.1 | 2,24  | Grin1  | JUC0200013107.mm.1 | -4,54 | 0,000005 | 0,179072 |                     |      |
| TC0200003142.mm.1 | 2,24  | Grin1  | JUC0200013105.mm.1 | -5,53 | 0,033016 | 0,521478 |                     |      |
| TC1600001807.mm.1 | 2,75  | Arl6   | JUC1600007542.mm.1 | 12,41 | 0,032314 | 0,519155 |                     |      |
| TC1600001807.mm.1 | 2,75  | Arl6   | PSR1600014542.mm.1 | -2,82 | 0,024372 | 0,49362  | Alternative 5' Donc | 0,28 |
| TC1600001807.mm.1 | 2,75  | Arl6   | PSR1600014543.mm.1 | -3,42 | 0,005478 | 0,379939 | Alternative 5' Donc | 0,28 |
| TC1600001807.mm.1 | 2,75  | Arl6   | JUC1600007535.mm.1 | -3,57 | 0,005775 | 0,383104 |                     |      |
| TC1600001807.mm.1 | 2,75  | Arl6   | JUC1600007546.mm.1 | -6,13 | 0,009574 | 0,417047 |                     |      |
| TC0200000803.mm.1 | -1,07 | Lypd6b | JUC0200003379.mm.1 | 12,32 | 0,027765 | 0,505135 |                     |      |
| TC0100002054.mm.1 | 2,34  | Rims1  | PSR0100016719.mm.1 | 12,24 | 0,000937 | 0,313363 | Cassette Exon       | 0,47 |
| TC0100002054.mm.1 | 2,34  | Rims1  | PSR0100016717.mm.1 | 4,59  | 0,00631  | 0,389263 | Cassette Exon       | 0,33 |
| TC0100002054.mm.1 | 2,34  | Rims1  | JUC0100009482.mm.1 | 3,93  | 0,006608 | 0,392252 |                     |      |
| TC0100002054.mm.1 | 2,34  | Rims1  | PSR0100016718.mm.1 | 3,01  | 0,023407 | 0,490259 | Cassette Exon       | 0,33 |
| TC0100002054.mm.1 | 2,34  | Rims1  | PSR0100016720.mm.1 | 2,82  | 0,032809 | 0,520894 | Cassette Exon       | 0,22 |
| TC0100002054.mm.1 | 2,34  | Rims1  | JUC0100009521.mm.1 | 2,81  | 0,025115 | 0,496358 |                     |      |
| TC0100002054.mm.1 | 2,34  | Rims1  | PSR0100016727.mm.1 | 2,61  | 0,013689 | 0,444581 | Cassette Exon       | 0,13 |
| TC0100002054.mm.1 | 2,34  | Rims1  | PSR0100016716.mm.1 | 2,4   | 0,004564 | 0,369273 | Cassette Exon       | 0,33 |
| TC0100002054.mm.1 | 2,34  | Rims1  | JUC0100009505.mm.1 | 2,26  | 0,027766 | 0,505135 |                     |      |
| TC0100002054.mm.1 | 2,34  | Rims1  | JUC0100009483.mm.1 | 2,24  | 0,049157 | 0,562368 |                     |      |
| TC0100002054.mm.1 | 2,34  | Rims1  | JUC0100009516.mm.1 | -2,12 | 0,045552 | 0,554401 |                     |      |
| TC0100002054.mm.1 | 2,34  | Rims1  | PSR0100016767.mm.1 | -2,37 | 0,03282  | 0,520896 | Cassette Exon       | 0,17 |
| TC0100002054.mm.1 | 2,34  | Rims1  | JUC0100009494.mm.1 | -2,4  | 0,007759 | 0,402774 |                     |      |
| TC0100002054.mm.1 | 2,34  | Rims1  | PSR0100016766.mm.1 | -2,48 | 0,015369 | 0,453849 | Cassette Exon       | 0,17 |
| TC0100002054.mm.1 | 2,34  | Rims1  | JUC0100009510.mm.1 | -2,57 | 0,027776 | 0,50524  |                     |      |
| TC0100002054.mm.1 | 2,34  | Rims1  | JUC0100009522.mm.1 | -3,07 | 0,007525 | 0,40125  |                     |      |
| TC1600001219.mm.1 | -1,03 |        | JUC1600005073.mm.1 | 12,23 | 0,022822 | 0,488298 |                     |      |
| TC1100000859.mm.1 | -1,03 | Gas7   | PSR1100007123.mm.1 | 12,17 | 0,008782 | 0,409822 | Cassette Exon       | 0,42 |
| TC1100000859.mm.1 | -1,03 | Gas7   | PSR1100007124.mm.1 | 7,27  | 0,002837 | 0,352207 | Cassette Exon       | 0,42 |
| TC1100000859.mm.1 | -1,03 | Gas7   | JUC1100003763.mm.1 | 4,69  | 0,007376 | 0,39943  |                     |      |
| TC1100000859.mm.1 | -1,03 | Gas7   | PSR1100007130.mm.1 | 3,78  | 0,018845 | 0,470912 | Alternative 3' Acce | 0,42 |
| TC1100000859.mm.1 | -1,03 | Gas7   | PSR1100007126.mm.1 | 3,39  | 0,01203  | 0,432286 | Alternative 3' Acce | 0,42 |
| TC1100000859.mm.1 | -1,03 | Gas7   | PSR1100007125.mm.1 | 3,05  | 0,015258 | 0,452847 | Alternative 3' Acce | 0,42 |
| TC1100000859.mm.1 | -1,03 | Gas7   | PSR1100007131.mm.1 | 2,46  | 0,005635 | 0,381532 | Alternative 3' Acce | 0,42 |
| TC1100000859.mm.1 | -1,03 | Gas7   | PSR1100007128.mm.1 | 2,35  | 0,045769 | 0,554863 | Alternative 3' Acce | 0,42 |

|                   |              |                    |       |          |                              |      |
|-------------------|--------------|--------------------|-------|----------|------------------------------|------|
| TC1100000859.mm.1 | -1,03 Gas7   | PSR1100007097.mm.1 | -2,22 | 0,039533 | 0,539764 Cassette Exon       | 0,11 |
| TC1100000859.mm.1 | -1,03 Gas7   | PSR1100007095.mm.1 | -2,44 | 0,025179 | 0,496598 Alternative 3' Acce | 0,16 |
| TC1100000859.mm.1 | -1,03 Gas7   | JUC1100003771.mm.1 | -2,88 | 0,014166 | 0,447466                     |      |
| TC0100002028.mm.1 | -1,35 Pkhd1  | JUC0100009379.mm.1 | 12,07 | 0,004798 | 0,371408                     |      |
| TC0500000723.mm.1 | 1,27 Exoc1   | JUC0500003544.mm.1 | 12,05 | 0,01783  | 0,466005                     |      |
| TC1100001397.mm.1 | 1,62 Mmd     | JUC1100006853.mm.1 | 12,04 | 0,002224 | 0,345773                     |      |
| TC1100001397.mm.1 | 1,62 Mmd     | PSR1100013062.mm.1 | 5,54  | 0,011238 | 0,426718 Cassette Exon       | 0,4  |
| TC1100001397.mm.1 | 1,62 Mmd     | JUC1100006861.mm.1 | 4,52  | 0,02583  | 0,498598                     |      |
| TC1100001397.mm.1 | 1,62 Mmd     | PSR1100013061.mm.1 | 3,52  | 0,009995 | 0,418456 Cassette Exon       | 0,37 |
| TC1100001397.mm.1 | 1,62 Mmd     | PSR1100013079.mm.1 | 3,05  | 0,019842 | 0,475536 Cassette Exon       | 0,4  |
| TC1100001397.mm.1 | 1,62 Mmd     | PSR1100013065.mm.1 | 2,85  | 0,024559 | 0,494116 Alternative 3' Acce | 0,28 |
| TC1100001397.mm.1 | 1,62 Mmd     | JUC1100006858.mm.1 | 2,69  | 0,008202 | 0,405909                     |      |
| TC1100001397.mm.1 | 1,62 Mmd     | PSR1100013066.mm.1 | 2,68  | 0,016003 | 0,457051 Alternative 3' Acce | 0,28 |
| TC1100001397.mm.1 | 1,62 Mmd     | JUC1100006862.mm.1 | 2,68  | 0,012473 | 0,435351                     |      |
| TC0700001101.mm.1 | -1,83 Agbl1  | JUC0700004969.mm.1 | 11,98 | 0,002677 | 0,349612                     |      |
| TC0700001101.mm.1 | -1,83 Agbl1  | JUC0700004982.mm.1 | 2,96  | 0,005439 | 0,379743                     |      |
| TC1800000945.mm.1 | -1,25 Kif5b  | JUC1800003862.mm.1 | 11,89 | 0,024906 | 0,495688                     |      |
| TC1800000945.mm.1 | -1,25 Kif5b  | JUC1800003867.mm.1 | 2,29  | 0,016818 | 0,460623                     |      |
| TC1900001711.mm.1 | -1,19 Ablim1 | JUC1900008452.mm.1 | 11,86 | 0,008271 | 0,405976                     |      |
| TC1900001711.mm.1 | -1,19 Ablim1 | JUC1900008447.mm.1 | 8,34  | 0,028878 | 0,50858                      |      |
| TC1900001711.mm.1 | -1,19 Ablim1 | JUC1900008432.mm.1 | 5,22  | 0,028538 | 0,507479                     |      |
| TC1900001711.mm.1 | -1,19 Ablim1 | PSR1900015196.mm.1 | 3,06  | 0,020636 | 0,478837 Cassette Exon       | 0,31 |
| TC1900001711.mm.1 | -1,19 Ablim1 | JUC1900008434.mm.1 | 2,89  | 0,047031 | 0,557783                     |      |
| TC1900001711.mm.1 | -1,19 Ablim1 | PSR1900015197.mm.1 | 2,39  | 0,035749 | 0,529051 Cassette Exon       | 0,15 |
| TC0700000976.mm.1 | 1,15 Trpm1   | JUC0700004511.mm.1 | 11,84 | 0,000536 | 0,304044                     |      |
| TC0700000976.mm.1 | 1,15 Trpm1   | PSR0700008844.mm.1 | 8,25  | 0,001968 | 0,340561 Cassette Exon       | 0,41 |
| TC0700000976.mm.1 | 1,15 Trpm1   | PSR0700008915.mm.1 | 3,96  | 0,006278 | 0,388805 Cassette Exon       | 0,34 |
| TC0700000976.mm.1 | 1,15 Trpm1   | PSR0700008914.mm.1 | 3,9   | 0,004952 | 0,373423 Cassette Exon       | 0,34 |
| TC0700000976.mm.1 | 1,15 Trpm1   | PSR0700008911.mm.1 | 3,85  | 0,010062 | 0,418902 Cassette Exon       | 0,4  |
| TC0700000976.mm.1 | 1,15 Trpm1   | JUC0700004528.mm.1 | 3,46  | 0,046552 | 0,556761                     |      |
| TC0700000976.mm.1 | 1,15 Trpm1   | PSR0700008913.mm.1 | 3,44  | 0,00236  | 0,34829 Cassette Exon        | 0,34 |
| TC0700000976.mm.1 | 1,15 Trpm1   | JUC0700004517.mm.1 | 3,22  | 0,010129 | 0,419203                     |      |
| TC0700000976.mm.1 | 1,15 Trpm1   | JUC0700004539.mm.1 | 3,14  | 0,043673 | 0,550236                     |      |
| TC0700000976.mm.1 | 1,15 Trpm1   | JUC0700004516.mm.1 | 3,07  | 0,021659 | 0,483789                     |      |
| TC0700000976.mm.1 | 1,15 Trpm1   | JUC0700004531.mm.1 | 3,03  | 0,026464 | 0,501252                     |      |
| TC0700000976.mm.1 | 1,15 Trpm1   | JUC0700004529.mm.1 | 2,99  | 0,020807 | 0,479505                     |      |
| TC0700000976.mm.1 | 1,15 Trpm1   | PSR0700008917.mm.1 | 2,96  | 0,034962 | 0,52724 Cassette Exon        | 0,34 |
| TC0700000976.mm.1 | 1,15 Trpm1   | PSR0700008905.mm.1 | 2,42  | 0,025981 | 0,499207 Cassette Exon       | 0,22 |
| TC0700000976.mm.1 | 1,15 Trpm1   | PSR0700008910.mm.1 | 2,39  | 0,019501 | 0,474493 Cassette Exon       | 0,17 |
| TC0700000976.mm.1 | 1,15 Trpm1   | JUC0700004535.mm.1 | 2,25  | 0,012025 | 0,432286                     |      |
| TC0700000976.mm.1 | 1,15 Trpm1   | PSR0700008901.mm.1 | 2,16  | 0,01224  | 0,433659 Cassette Exon       | 0,12 |
| TC0700000976.mm.1 | 1,15 Trpm1   | PSR0700008897.mm.1 | 2,1   | 0,043779 | 0,550398 Alternative 5' Donc | 0,11 |
| TC0700000976.mm.1 | 1,15 Trpm1   | JUC0700004536.mm.1 | 2,04  | 0,035879 | 0,52938                      |      |
| TC0700000976.mm.1 | 1,15 Trpm1   | JUC0700004515.mm.1 | 2,03  | 0,025842 | 0,498615                     |      |
| TC0700000728.mm.1 | -1,09 Gm2108 | JUC0700002949.mm.1 | 11,79 | 0,004558 | 0,369246                     |      |
| TC0200003118.mm.1 | 1,66 Cacna1b | JUC0200012954.mm.1 | 11,76 | 0,000303 | 0,288663                     |      |
| TC0200003118.mm.1 | 1,66 Cacna1b | JUC0200012915.mm.1 | 8,85  | 0,000939 | 0,313363                     |      |
| TC0200003118.mm.1 | 1,66 Cacna1b | JUC0200012921.mm.1 | 7,97  | 0,000482 | 0,298999                     |      |

|                   |       |         |                    |       |          |          |                     |      |
|-------------------|-------|---------|--------------------|-------|----------|----------|---------------------|------|
| TC0200003118.mm.1 | 1,66  | Cacna1b | PSR0200025568.mm.1 | 6,98  | 0,00022  | 0,22008  | Cassette Exon       | 0,42 |
| TC0200003118.mm.1 | 1,66  | Cacna1b | PSR0200025569.mm.1 | 5,22  | 0,001294 | 0,322675 | Cassette Exon       | 0,55 |
| TC0200003118.mm.1 | 1,66  | Cacna1b | JUC0200012922.mm.1 | 4,8   | 0,005302 | 0,378059 |                     |      |
| TC0200003118.mm.1 | 1,66  | Cacna1b | PSR0200025589.mm.1 | 3,74  | 0,003551 | 0,356223 | Cassette Exon       | 0,26 |
| TC0200003118.mm.1 | 1,66  | Cacna1b | JUC0200012917.mm.1 | 3,22  | 0,018905 | 0,47127  |                     |      |
| TC0200003118.mm.1 | 1,66  | Cacna1b | PSR0200025549.mm.1 | 3,19  | 0,005999 | 0,386404 | Cassette Exon       | 0,16 |
| TC0200003118.mm.1 | 1,66  | Cacna1b | PSR0200025563.mm.1 | 2,93  | 0,000186 | 0,284485 | Cassette Exon       | 0,28 |
| TC0200003118.mm.1 | 1,66  | Cacna1b | PSR0200025551.mm.1 | 2,29  | 0,015215 | 0,45279  | Cassette Exon       | 0,17 |
| TC0200003118.mm.1 | 1,66  | Cacna1b | JUC0200012910.mm.1 | 2,22  | 0,01514  | 0,452699 |                     |      |
| TC0200003118.mm.1 | 1,66  | Cacna1b | PSR0200025591.mm.1 | 2,06  | 0,007003 | 0,395737 | Cassette Exon       | 0,11 |
| TC0200003118.mm.1 | 1,66  | Cacna1b | PSR0200025562.mm.1 | 2,05  | 0,0011   | 0,317328 | Cassette Exon       | 0,28 |
| TC0200003118.mm.1 | 1,66  | Cacna1b | PSR0200025543.mm.1 | -2,02 | 0,016985 | 0,461441 | Cassette Exon       | 0,1  |
| TC0200003118.mm.1 | 1,66  | Cacna1b | PSR0200025576.mm.1 | -2,14 | 0,013946 | 0,446234 | Cassette Exon       | 0,11 |
| TC0200003118.mm.1 | 1,66  | Cacna1b | PSR0200025542.mm.1 | -2,21 | 0,012404 | 0,435021 | Cassette Exon       | 0,1  |
| TC0200003118.mm.1 | 1,66  | Cacna1b | PSR0200025548.mm.1 | -2,23 | 0,002409 | 0,348653 | Alternative 3' Acce | 0,25 |
| TC0200003118.mm.1 | 1,66  | Cacna1b | PSR0200025541.mm.1 | -2,55 | 0,000741 | 0,307808 | Cassette Exon       | 0,1  |
| TC0200003118.mm.1 | 1,66  | Cacna1b | JUC0200012962.mm.1 | -2,59 | 0,033682 | 0,523549 |                     |      |
| TC0200003118.mm.1 | 1,66  | Cacna1b | JUC0200012959.mm.1 | -2,68 | 0,021115 | 0,480564 |                     |      |
| TC0200003118.mm.1 | 1,66  | Cacna1b | PSR0200025538.mm.1 | -2,9  | 0,011751 | 0,430017 | Alternative 3' Acce | 0,25 |
| TC0200003118.mm.1 | 1,66  | Cacna1b | JUC0200012967.mm.1 | -3,11 | 0,000628 | 0,304044 |                     |      |
| TC1800000484.mm.1 | -1,34 | Ap3s1   | JUC1800001973.mm.1 | 11,76 | 0,031735 | 0,517489 |                     |      |
| TC0400001058.mm.1 | 8,24  | Sgip1   | JUC0400003686.mm.1 | 11,63 | 0,000782 | 0,309887 |                     |      |
| TC0400001058.mm.1 | 8,24  | Sgip1   | JUC0400003702.mm.1 | 3,39  | 0,00752  | 0,401141 |                     |      |
| TC0400001058.mm.1 | 8,24  | Sgip1   | JUC0400003697.mm.1 | 2,24  | 0,002867 | 0,352207 |                     |      |
| TC0400001058.mm.1 | 8,24  | Sgip1   | JUC0400003682.mm.1 | 2,13  | 0,02685  | 0,502454 |                     |      |
| TC0400001058.mm.1 | 8,24  | Sgip1   | PSR0400007227.mm.1 | 2,03  | 0,02784  | 0,505537 | Cassette Exon       | 0,2  |
| TC0400001058.mm.1 | 8,24  | Sgip1   | PSR0400007210.mm.1 | -2,11 | 0,020271 | 0,477245 | Cassette Exon       | 0,14 |
| TC0400001058.mm.1 | 8,24  | Sgip1   | PSR0400007196.mm.1 | -2,12 | 0,003787 | 0,357586 | Alternative 5' Donc | 0,23 |
| TC0400001058.mm.1 | 8,24  | Sgip1   | PSR0400007189.mm.1 | -2,15 | 0,005403 | 0,378967 | Alternative 5' Donc | 0,05 |
| TC0400001058.mm.1 | 8,24  | Sgip1   | PSR0400007208.mm.1 | -2,44 | 0,039122 | 0,538475 | Cassette Exon       | 0,16 |
| TC0400001058.mm.1 | 8,24  | Sgip1   | PSR0400007225.mm.1 | -2,5  | 0,005008 | 0,373851 | Alternative 5' Donc | 0,22 |
| TC0400001058.mm.1 | 8,24  | Sgip1   | PSR0400007207.mm.1 | -2,5  | 0,000312 | 0,288663 | Cassette Exon       | 0,16 |
| TC0400001058.mm.1 | 8,24  | Sgip1   | PSR0400007211.mm.1 | -3,08 | 0,017459 | 0,463886 | Alternative 3' Acce | 0,29 |
| TC0400001058.mm.1 | 8,24  | Sgip1   | PSR0400007216.mm.1 | -3,22 | 0,009563 | 0,416927 | Cassette Exon       | 0,35 |
| TC0400001058.mm.1 | 8,24  | Sgip1   | PSR0400007213.mm.1 | -3,25 | 0,0023   | 0,346364 | Cassette Exon       | 0,34 |
| TC0400001058.mm.1 | 8,24  | Sgip1   | PSR0400007217.mm.1 | -3,29 | 0,013209 | 0,440879 | Cassette Exon       | 0,01 |
| TC0400001058.mm.1 | 8,24  | Sgip1   | PSR0400007199.mm.1 | -3,56 | 0,010844 | 0,424161 | Alternative 5' Donc | 0,41 |
| TC0400001058.mm.1 | 8,24  | Sgip1   | PSR0400007192.mm.1 | -3,58 | 0,002037 | 0,341377 | Cassette Exon       | 0,36 |
| TC0400001058.mm.1 | 8,24  | Sgip1   | PSR0400007200.mm.1 | -3,76 | 0,008516 | 0,407551 | Cassette Exon       | 0,46 |
| TC0400001058.mm.1 | 8,24  | Sgip1   | JUC0400003679.mm.1 | -4,35 | 0,000734 | 0,307808 |                     |      |
| TC0400001058.mm.1 | 8,24  | Sgip1   | PSR0400007177.mm.1 | -4,62 | 0,008444 | 0,406611 | Alternative 3' Acce | 0,34 |
| TC0400001058.mm.1 | 8,24  | Sgip1   | PSR0400007190.mm.1 | -5,42 | 0,005186 | 0,376851 | Cassette Exon       | 0,34 |
| TC0400001058.mm.1 | 8,24  | Sgip1   | JUC0400003683.mm.1 | -5,7  | 0,008217 | 0,405958 |                     |      |
| TC0400001058.mm.1 | 8,24  | Sgip1   | PSR0400007175.mm.1 | -5,74 | 0,007149 | 0,39769  | Cassette Exon       | 0,41 |
| TC0400001058.mm.1 | 8,24  | Sgip1   | PSR0400007176.mm.1 | -5,9  | 0,018231 | 0,46765  | Cassette Exon       | 0,21 |
| TC0400001058.mm.1 | 8,24  | Sgip1   | JUC0400003696.mm.1 | -5,92 | 0,000661 | 0,304044 |                     |      |
| TC0400001058.mm.1 | 8,24  | Sgip1   | JUC0400003676.mm.1 | -6,55 | 0,008437 | 0,406611 |                     |      |
| TC0400001058.mm.1 | 8,24  | Sgip1   | JUC0400003711.mm.1 | -6,58 | 0,013565 | 0,443703 |                     |      |

|                   |                    |                    |        |          |                              |      |
|-------------------|--------------------|--------------------|--------|----------|------------------------------|------|
| TC0400001058.mm.1 | 8,24 Sgip1         | JUC0400003708.mm.1 | -6,62  | 0,011325 | 0,427133                     |      |
| TC0400001058.mm.1 | 8,24 Sgip1         | JUC0400003715.mm.1 | -6,8   | 0,011208 | 0,426683                     |      |
| TC0400001058.mm.1 | 8,24 Sgip1         | JUC0400003685.mm.1 | -7,24  | 0,000081 | 0,25272                      |      |
| TC0400001058.mm.1 | 8,24 Sgip1         | JUC0400003707.mm.1 | -10,53 | 0,005274 | 0,378059                     |      |
| TC0400001058.mm.1 | 8,24 Sgip1         | JUC0400003709.mm.1 | -11,01 | 0,000162 | 0,272566                     |      |
| TC0500002320.mm.1 | 2,67 Prom1         | JUC0500011649.mm.1 | 11,53  | 0,036151 | 0,529835                     |      |
| TC0500002320.mm.1 | 2,67 Prom1         | JUC0500011633.mm.1 | 4,84   | 0,006042 | 0,386586                     |      |
| TC0500002320.mm.1 | 2,67 Prom1         | JUC0500011650.mm.1 | 4,58   | 0,028698 | 0,508019                     |      |
| TC0500002320.mm.1 | 2,67 Prom1         | JUC0500011634.mm.1 | 3,74   | 0,004432 | 0,366894                     |      |
| TC0100003146.mm.1 | 1,06 Camsap2       | JUC0100014563.mm.1 | 11,39  | 0,001129 | 0,317328                     |      |
| TC0100003146.mm.1 | 1,06 Camsap2       | JUC0100014546.mm.1 | 2,48   | 0,025737 | 0,498265                     |      |
| TC1300001420.mm.1 | -1,33              | JUC1300004624.mm.1 | 11,35  | 0,001967 | 0,340561                     |      |
| TC0800001666.mm.1 | 1,86 Fam155a       | JUC0800007417.mm.1 | 11,33  | 0,00012  | 0,270905                     |      |
| TC0800001666.mm.1 | 1,86 Fam155a       | PSR0800013636.mm.1 | 2,79   | 0,028545 | 0,507497 Alternative 3' Acce | 0,29 |
| TC0800001666.mm.1 | 1,86 Fam155a       | JUC0800007416.mm.1 | 2,57   | 0,038364 | 0,536296                     |      |
| TC0800001666.mm.1 | 1,86 Fam155a       | PSR0800013635.mm.1 | 2,24   | 0,026203 | 0,50003 Alternative 3' Acce  | 0,24 |
| TC0800001666.mm.1 | 1,86 Fam155a       | JUC0800007422.mm.1 | -2,98  | 0,027751 | 0,50504                      |      |
| TC0800001666.mm.1 | 1,86 Fam155a       | PSR0800013638.mm.1 | -3,51  | 0,006544 | 0,392035 Cassette Exon       | 0,35 |
| TC0800001666.mm.1 | 1,86 Fam155a       | PSR0800013640.mm.1 | -4,38  | 0,011253 | 0,426718 Cassette Exon       | 0,48 |
| TC0300000761.mm.1 | 1,25 Dcst2         | JUC0300003032.mm.1 | 11,3   | 0,030278 | 0,512602                     |      |
| TC0600000780.mm.1 | 1,07 E230016M11Rik | JUC0600002922.mm.1 | 11,22  | 0,002386 | 0,348564                     |      |
| TC0600000780.mm.1 | 1,07 E230016M11Rik | PSR0600005843.mm.1 | 4,53   | 0,002706 | 0,349612 Cassette Exon       | 0,41 |
| TC0600000780.mm.1 | 1,07 E230016M11Rik | PSR0600005842.mm.1 | 3,88   | 0,001481 | 0,329081 Cassette Exon       | 0,29 |
| TC0600000780.mm.1 | 1,07 E230016M11Rik | JUC0600002930.mm.1 | 3,28   | 0,011433 | 0,427663                     |      |
| TC0600000780.mm.1 | 1,07 E230016M11Rik | PSR0600005846.mm.1 | 3,05   | 0,008472 | 0,406734 Cassette Exon       | 0,32 |
| TC0600000780.mm.1 | 1,07 E230016M11Rik | PSR0600005839.mm.1 | 3      | 0,032953 | 0,52122 Cassette Exon        | 0,19 |
| TC0600000780.mm.1 | 1,07 E230016M11Rik | JUC0600002926.mm.1 | 2,5    | 0,021055 | 0,480262                     |      |
| TC0100000660.mm.1 | 1,59 Asic4         | JUC0100003270.mm.1 | 11,2   | 0,002395 | 0,348564                     |      |
| TC0100000660.mm.1 | 1,59 Asic4         | JUC0100003264.mm.1 | 4,97   | 0,006514 | 0,391382                     |      |
| TC0100000660.mm.1 | 1,59 Asic4         | JUC0100003262.mm.1 | 3,88   | 0,04475  | 0,552338                     |      |
| TC0100000660.mm.1 | 1,59 Asic4         | PSR0100005669.mm.1 | -2,09  | 0,007457 | 0,400326 Cassette Exon       | 0,1  |
| TC0900000786.mm.1 | -1,07 Anp32a       | JUC0900003152.mm.1 | 11,17  | 0,005389 | 0,378916                     |      |
| TC0900000786.mm.1 | -1,07 Anp32a       | JUC0900003153.mm.1 | 9,22   | 0,015251 | 0,452847                     |      |
| TC0900000786.mm.1 | -1,07 Anp32a       | PSR0900005891.mm.1 | 4,03   | 0,006525 | 0,391502 Cassette Exon       | 0,39 |
| TC0900000786.mm.1 | -1,07 Anp32a       | PSR0900005890.mm.1 | 3,39   | 0,01184  | 0,430614 Cassette Exon       | 0,39 |
| TC0300001624.mm.1 | -1,06 Tpd52        | JUC0300006855.mm.1 | 11,14  | 0,035101 | 0,527591                     |      |
| TC0300001624.mm.1 | -1,06 Tpd52        | JUC0300006856.mm.1 | 6,89   | 0,018375 | 0,468484                     |      |
| TC0300001624.mm.1 | -1,06 Tpd52        | JUC0300006848.mm.1 | 6,35   | 0,043095 | 0,548536                     |      |
| TC0300001624.mm.1 | -1,06 Tpd52        | PSR0300012939.mm.1 | 4,72   | 0,002243 | 0,34578 Cassette Exon        | 0,56 |
| TC0300001624.mm.1 | -1,06 Tpd52        | PSR0300012940.mm.1 | 4,51   | 0,019664 | 0,474887 Cassette Exon       | 0,48 |
| TC0300001624.mm.1 | -1,06 Tpd52        | JUC0300006847.mm.1 | 4,1    | 0,036997 | 0,532502                     |      |
| TC0300001624.mm.1 | -1,06 Tpd52        | JUC0300006849.mm.1 | 3,33   | 0,011548 | 0,428813                     |      |
| TC0300001624.mm.1 | -1,06 Tpd52        | PSR0300012949.mm.1 | 2,92   | 0,004809 | 0,371408 Cassette Exon       | 0,25 |
| TC0300001624.mm.1 | -1,06 Tpd52        | JUC0300006854.mm.1 | 2,48   | 0,012083 | 0,43255                      |      |
| TC1000002056.mm.1 | 1,1 Cep57l1        | JUC1000007965.mm.1 | 11,08  | 0,010608 | 0,422786                     |      |
| TC1000002056.mm.1 | 1,1 Cep57l1        | PSR1000014659.mm.1 | -2,59  | 0,016066 | 0,457431 Alternative 3' Acce | 0,25 |
| TC1600000571.mm.1 | 1,6 Lsmp           | JUC1600002825.mm.1 | 11,04  | 0,001991 | 0,341091                     |      |
| TC1600000571.mm.1 | 1,6 Lsmp           | PSR1600005377.mm.1 | 4,67   | 0,018689 | 0,47037 Cassette Exon        | 0,46 |

|                   |                     |                    |       |          |                              |      |
|-------------------|---------------------|--------------------|-------|----------|------------------------------|------|
| TC160000571.mm.1  | 1,6 Lsamp           | PSR1600005372.mm.1 | 2,7   | 0,005621 | 0,381231 Alternative 3' Acce | 0,15 |
| TC160000571.mm.1  | 1,6 Lsamp           | PSR1600005405.mm.1 | 2,61  | 0,044315 | 0,551368                     |      |
| TC160000571.mm.1  | 1,6 Lsamp           | JUC1600002828.mm.1 | 2,52  | 0,027427 | 0,503961                     |      |
| TC160000571.mm.1  | 1,6 Lsamp           | PSR1600005399.mm.1 | 2,46  | 0,043557 | 0,550033 Cassette Exon       | 0,15 |
| TC160000571.mm.1  | 1,6 Lsamp           | JUC1600002830.mm.1 | 2,14  | 0,025402 | 0,497403                     |      |
| TC160000571.mm.1  | 1,6 Lsamp           | PSR1600005403.mm.1 | 2,13  | 0,025729 | 0,498173                     |      |
| TC160000571.mm.1  | 1,6 Lsamp           | PSR1600005396.mm.1 | -2,37 | 0,020195 | 0,477145 Cassette Exon       | 0,16 |
| TC160000571.mm.1  | 1,6 Lsamp           | PSR1600005370.mm.1 | -2,4  | 0,012161 | 0,432939 Alternative 3' Acce | 0,22 |
| TC160000571.mm.1  | 1,6 Lsamp           | PSR1600005398.mm.1 | -2,41 | 0,011503 | 0,42822 Cassette Exon        | 0,15 |
| TC050000499.mm.1  | 1,57 Slit2          | JUC0500002653.mm.1 | 11,01 | 0,000597 | 0,304044                     |      |
| TC050000499.mm.1  | 1,57 Slit2          | JUC0500002647.mm.1 | 7,38  | 0,002302 | 0,346364                     |      |
| TC050000499.mm.1  | 1,57 Slit2          | JUC0500002642.mm.1 | 5,18  | 0,017071 | 0,462106                     |      |
| TC050000499.mm.1  | 1,57 Slit2          | PSR0500004747.mm.1 | 2,95  | 0,013758 | 0,444784 Cassette Exon       | 0,37 |
| TC050000499.mm.1  | 1,57 Slit2          | PSR0500004754.mm.1 | -2,13 | 0,032234 | 0,51899 Alternative 5' Donc  | 0,16 |
| TC050000499.mm.1  | 1,57 Slit2          | JUC0500002648.mm.1 | -6,76 | 0,035934 | 0,529399                     |      |
| TC0400001129.mm.1 | -1,22 Ndc1          | JUC0400004062.mm.1 | 11    | 0,009989 | 0,418456                     |      |
| TC0400001129.mm.1 | -1,22 Ndc1          | PSR0400007849.mm.1 | 2,34  | 0,028817 | 0,508347 Alternative 3' Acce | 0,19 |
| TC1600000415.mm.1 | 1,31 Dlg1           | JUC1600002019.mm.1 | 10,93 | 0,017715 | 0,465209                     |      |
| TC1600000415.mm.1 | 1,31 Dlg1           | JUC1600002009.mm.1 | 2,19  | 0,035375 | 0,528536                     |      |
| TC1600000415.mm.1 | 1,31 Dlg1           | JUC1600002022.mm.1 | -2,02 | 0,030306 | 0,512738                     |      |
| TC1600000415.mm.1 | 1,31 Dlg1           | JUC1600001997.mm.1 | -2,23 | 0,032668 | 0,520432                     |      |
| TC1600002162.mm.1 | -1,05 A630089N07Rik | JUC1600008703.mm.1 | 10,72 | 0,001702 | 0,335511                     |      |
| TC1100001721.mm.1 | -1,18 Wnt3          | JUC1100008400.mm.1 | 10,63 | 0,022502 | 0,487114                     |      |
| TC1200000840.mm.1 | 1,08 Ttll5          | JUC1200003438.mm.1 | 10,57 | 0,01857  | 0,469618                     |      |
| TC1200000840.mm.1 | 1,08 Ttll5          | PSR1200006131.mm.1 | 2,63  | 0,001354 | 0,325427 Cassette Exon       | 0,19 |
| TC1200000840.mm.1 | 1,08 Ttll5          | JUC1200003456.mm.1 | 2,16  | 0,011296 | 0,427123                     |      |
| TC1200000840.mm.1 | 1,08 Ttll5          | JUC1200003489.mm.1 | -2,47 | 0,006933 | 0,395269                     |      |
| TC1900000054.mm.1 | -1,1 Rin1           | JUC1900000382.mm.1 | 10,55 | 0,02371  | 0,491428                     |      |
| TC0700003023.mm.1 | 1,08 Kcnj14         | PSR0700027463.mm.1 | 10,5  | 0,001388 | 0,325997 Cassette Exon       | 0,28 |
| TC0700003023.mm.1 | 1,08 Kcnj14         | PSR0700027464.mm.1 | 2,83  | 0,028451 | 0,507299 Cassette Exon       | 0,17 |
| TC0700002217.mm.1 | 1,04 Peg3           | JUC0700010670.mm.1 | 10,21 | 0,0015   | 0,329714                     |      |
| TC0700002217.mm.1 | 1,04 Peg3           | JUC0700010671.mm.1 | 6,9   | 0,008537 | 0,407916                     |      |
| TC0700002217.mm.1 | 1,04 Peg3           | PSR0700020133.mm.1 | 2,62  | 0,006303 | 0,389124 Cassette Exon       | 0,47 |
| TC0700002217.mm.1 | 1,04 Peg3           | PSR0700020141.mm.1 | 2,13  | 0,002177 | 0,344453 Alternative 5' Donc | 0,12 |
| TC1400000780.mm.1 | 3 Cpne6             | JUC1400003284.mm.1 | 10,18 | 0,015792 | 0,455742                     |      |
| TC1400000780.mm.1 | 3 Cpne6             | PSR1400006149.mm.1 | 4,06  | 0,000878 | 0,311909 Cassette Exon       | 0,43 |
| TC1400000780.mm.1 | 3 Cpne6             | JUC1400003285.mm.1 | 4,05  | 0,003882 | 0,359196                     |      |
| TC1400000780.mm.1 | 3 Cpne6             | JUC1400003277.mm.1 | 3,1   | 0,002006 | 0,341091                     |      |
| TC1400000780.mm.1 | 3 Cpne6             | PSR1400006160.mm.1 | 3,02  | 0,000297 | 0,288663 Cassette Exon       | 0,14 |
| TC1400000780.mm.1 | 3 Cpne6             | JUC1400003279.mm.1 | 2,91  | 0,023359 | 0,490143                     |      |
| TC1400000780.mm.1 | 3 Cpne6             | JUC1400003278.mm.1 | 2,59  | 0,009681 | 0,417605                     |      |
| TC1400000780.mm.1 | 3 Cpne6             | PSR1400006148.mm.1 | 2,18  | 0,029627 | 0,510558 Cassette Exon       | 0,28 |
| TC1400000780.mm.1 | 3 Cpne6             | JUC1400003286.mm.1 | -2,16 | 0,015605 | 0,455078                     |      |
| TC1400000780.mm.1 | 3 Cpne6             | PSR1400006146.mm.1 | -2,17 | 0,001649 | 0,333988 Cassette Exon       | 0,24 |
| TC1400000780.mm.1 | 3 Cpne6             | PSR1400006167.mm.1 | -2,71 | 0,002973 | 0,352501 Alternative 5' Donc | 0,35 |
| TC1400000780.mm.1 | 3 Cpne6             | JUC1400003276.mm.1 | -2,95 | 0,005735 | 0,382993                     |      |
| TC1400000780.mm.1 | 3 Cpne6             | PSR1400006145.mm.1 | -2,96 | 0,003988 | 0,360652 Cassette Exon       | 0,27 |
| TC1400000780.mm.1 | 3 Cpne6             | JUC1400003289.mm.1 | -2,97 | 0,044145 | 0,551024                     |      |

|                   |                     |                    |       |          |                              |      |
|-------------------|---------------------|--------------------|-------|----------|------------------------------|------|
| TC1400000780.mm.1 | 3 Cpne6             | PSR1400006139.mm.1 | -3,3  | 0,019938 | 0,476043 Alternative 3' Acce | 0,08 |
| TC1400000780.mm.1 | 3 Cpne6             | JUC1400003291.mm.1 | -3,54 | 0,006271 | 0,388719                     |      |
| TC1400000780.mm.1 | 3 Cpne6             | PSR1400006141.mm.1 | -3,57 | 0,024837 | 0,495465 Alternative 3' Acce | 0,08 |
| TC1400000780.mm.1 | 3 Cpne6             | PSR1400006137.mm.1 | -3,65 | 0,008566 | 0,40821 Alternative 3' Acce  | 0,08 |
| TC1400000780.mm.1 | 3 Cpne6             | PSR1400006166.mm.1 | -3,66 | 0,009504 | 0,416602 Intron Retention    | 0,45 |
| TC1400000780.mm.1 | 3 Cpne6             | JUC1400003275.mm.1 | -3,98 | 0,020519 | 0,478264                     |      |
| TC1400000780.mm.1 | 3 Cpne6             | PSR1400006140.mm.1 | -4,31 | 0,013516 | 0,443428 Alternative 3' Acce | 0,08 |
| TC1400000780.mm.1 | 3 Cpne6             | JUC1400003290.mm.1 | -4,52 | 0,001455 | 0,328414                     |      |
| TC1400000780.mm.1 | 3 Cpne6             | PSR1400006136.mm.1 | -4,86 | 0,006706 | 0,393343 Alternative 3' Acce | 0,08 |
| TC1400000780.mm.1 | 3 Cpne6             | PSR1400006150.mm.1 | -4,88 | 0,00354  | 0,3562 Intron Retention      | 0,66 |
| TC1400000780.mm.1 | 3 Cpne6             | PSR1400006147.mm.1 | -5,16 | 0,008069 | 0,404565 Alternative 3' Acce | 0,62 |
| TC1400000780.mm.1 | 3 Cpne6             | PSR1400006138.mm.1 | -5,18 | 0,005716 | 0,382767 Cassette Exon       | 0,39 |
| TC1500000726.mm.1 | 1,24 L3mbtl2        | JUC1500003187.mm.1 | 10,17 | 0,006393 | 0,389654                     |      |
| TC1500000726.mm.1 | 1,24 L3mbtl2        | JUC1500003181.mm.1 | 2,68  | 0,023149 | 0,489795                     |      |
| TC1500000726.mm.1 | 1,24 L3mbtl2        | JUC1500003185.mm.1 | 2,03  | 0,036306 | 0,530479                     |      |
| TC1300002037.mm.1 | -1,83 Cltb          | JUC1300006572.mm.1 | 10,01 | 0,008299 | 0,406122                     |      |
| TC1300002037.mm.1 | -1,83 Cltb          | JUC1300006573.mm.1 | 6,68  | 0,006258 | 0,388622                     |      |
| TC1300002037.mm.1 | -1,83 Cltb          | PSR1300012732.mm.1 | 5,46  | 0,009132 | 0,413352 Cassette Exon       | 0,57 |
| TC0500001927.mm.1 | 1,8 Adam22; Gm19440 | JUC0500009623.mm.1 | 10    | 0,001879 | 0,338712                     |      |
| TC0500001927.mm.1 | 1,8 Adam22; Gm19440 | JUC0500009642.mm.1 | 4,35  | 0,004219 | 0,363236                     |      |
| TC0500001927.mm.1 | 1,8 Adam22; Gm19440 | JUC0500009644.mm.1 | 2,26  | 0,032571 | 0,520133                     |      |
| TC0500001927.mm.1 | 1,8 Adam22; Gm19440 | JUC0500009627.mm.1 | 2,19  | 0,029701 | 0,510949                     |      |
| TC0500001927.mm.1 | 1,8 Adam22; Gm19440 | PSR0500017749.mm.1 | -2,49 | 0,008384 | 0,4065 Cassette Exon         | 0,21 |
| TC0500001927.mm.1 | 1,8 Adam22; Gm19440 | JUC0500009634.mm.1 | -2,91 | 0,022009 | 0,485226                     |      |
| TC0500001927.mm.1 | 1,8 Adam22; Gm19440 | JUC0500009637.mm.1 | -3,04 | 0,039201 | 0,538692                     |      |
| TC0500001927.mm.1 | 1,8 Adam22; Gm19440 | PSR0500017752.mm.1 | -3,27 | 0,004175 | 0,362543 Alternative 3' Acce | 0,34 |
| TC0500001927.mm.1 | 1,8 Adam22; Gm19440 | JUC0500009629.mm.1 | -3,41 | 0,014237 | 0,447947                     |      |
| TC0500001927.mm.1 | 1,8 Adam22; Gm19440 | JUC0500009633.mm.1 | -3,86 | 0,016651 | 0,459985                     |      |
| TC0500001927.mm.1 | 1,8 Adam22; Gm19440 | JUC0500009638.mm.1 | -5,48 | 0,008252 | 0,405976                     |      |
| TC0800002437.mm.1 | 1,36 Unc13a         | PSR0800018618.mm.1 | 9,98  | 0,004845 | 0,37168 Cassette Exon        | 0,55 |
| TC0800002437.mm.1 | 1,36 Unc13a         | JUC0800010130.mm.1 | 9,55  | 0,002043 | 0,341377                     |      |
| TC0800002437.mm.1 | 1,36 Unc13a         | JUC0800010126.mm.1 | 8,71  | 0,00255  | 0,349501                     |      |
| TC0800002437.mm.1 | 1,36 Unc13a         | PSR0800018617.mm.1 | 8,17  | 0,00215  | 0,343679 Cassette Exon       | 0,55 |
| TC0800002437.mm.1 | 1,36 Unc13a         | JUC0800010119.mm.1 | 7,51  | 0,002513 | 0,349347                     |      |
| TC0800002437.mm.1 | 1,36 Unc13a         | JUC0800010129.mm.1 | 6,89  | 0,003337 | 0,354243                     |      |
| TC0800002437.mm.1 | 1,36 Unc13a         | JUC0800010127.mm.1 | 6,68  | 0,003931 | 0,359818                     |      |
| TC0800002437.mm.1 | 1,36 Unc13a         | JUC0800010122.mm.1 | 6,62  | 0,001678 | 0,335182                     |      |
| TC0800002437.mm.1 | 1,36 Unc13a         | JUC0800010131.mm.1 | 6,19  | 0,046662 | 0,556812                     |      |
| TC0800002437.mm.1 | 1,36 Unc13a         | JUC0800010147.mm.1 | 5,86  | 0,002429 | 0,349                        |      |
| TC0800002437.mm.1 | 1,36 Unc13a         | JUC0800010128.mm.1 | 5,78  | 0,012657 | 0,43631                      |      |
| TC0800002437.mm.1 | 1,36 Unc13a         | PSR0800018619.mm.1 | 5,62  | 0,001706 | 0,335996 Cassette Exon       | 0,55 |
| TC0800002437.mm.1 | 1,36 Unc13a         | PSR0800018612.mm.1 | 5,53  | 0,002407 | 0,348653 Cassette Exon       | 0,41 |
| TC0800002437.mm.1 | 1,36 Unc13a         | JUC0800010148.mm.1 | 4,84  | 0,009303 | 0,414883                     |      |
| TC0800002437.mm.1 | 1,36 Unc13a         | JUC0800010135.mm.1 | 4,56  | 0,005211 | 0,377078                     |      |
| TC0800002437.mm.1 | 1,36 Unc13a         | PSR0800018620.mm.1 | 4,35  | 0,00122  | 0,322251 Cassette Exon       | 0,55 |
| TC0800002437.mm.1 | 1,36 Unc13a         | JUC0800010114.mm.1 | 4,35  | 0,003167 | 0,353901                     |      |
| TC0800002437.mm.1 | 1,36 Unc13a         | JUC0800010111.mm.1 | 4,32  | 0,00565  | 0,381811                     |      |
| TC0800002437.mm.1 | 1,36 Unc13a         | PSR0800018603.mm.1 | 4,13  | 0,006378 | 0,389488 Cassette Exon       | 0,26 |

|                   |                 |                    |       |          |          |                     |      |
|-------------------|-----------------|--------------------|-------|----------|----------|---------------------|------|
| TC0800002437.mm.1 | 1,36 Unc13a     | JUC0800010134.mm.1 | 3,74  | 0,039628 | 0,540111 |                     |      |
| TC0800002437.mm.1 | 1,36 Unc13a     | JUC0800010136.mm.1 | 3,65  | 0,016977 | 0,461419 |                     |      |
| TC0800002437.mm.1 | 1,36 Unc13a     | PSR0800018631.mm.1 | 3,58  | 0,002984 | 0,352501 | Cassette Exon       | 0,23 |
| TC0800002437.mm.1 | 1,36 Unc13a     | PSR0800018595.mm.1 | 3,34  | 0,001807 | 0,336311 | Cassette Exon       | 0,18 |
| TC0800002437.mm.1 | 1,36 Unc13a     | JUC0800010110.mm.1 | 3,32  | 0,021009 | 0,480143 |                     |      |
| TC0800002437.mm.1 | 1,36 Unc13a     | JUC0800010121.mm.1 | 3,32  | 0,043288 | 0,549297 |                     |      |
| TC0800002437.mm.1 | 1,36 Unc13a     | PSR0800018621.mm.1 | 3,29  | 0,013779 | 0,444974 | Cassette Exon       | 0,48 |
| TC0800002437.mm.1 | 1,36 Unc13a     | PSR0800018630.mm.1 | 3,12  | 0,027813 | 0,505442 | Cassette Exon       | 0,3  |
| TC0800002437.mm.1 | 1,36 Unc13a     | JUC0800010146.mm.1 | 2,99  | 0,006765 | 0,393343 |                     |      |
| TC0800002437.mm.1 | 1,36 Unc13a     | PSR0800018614.mm.1 | 2,96  | 0,004101 | 0,36228  | Cassette Exon       | 0,19 |
| TC0800002437.mm.1 | 1,36 Unc13a     | PSR0800018626.mm.1 | 2,88  | 0,018518 | 0,469117 | Cassette Exon       | 0,43 |
| TC0800002437.mm.1 | 1,36 Unc13a     | PSR0800018611.mm.1 | 2,67  | 0,022003 | 0,485226 | Cassette Exon       | 0,39 |
| TC0800002437.mm.1 | 1,36 Unc13a     | PSR0800018606.mm.1 | 2,6   | 0,004886 | 0,372195 | Alternative 5' Donc | 0,21 |
| TC0800002437.mm.1 | 1,36 Unc13a     | JUC0800010125.mm.1 | 2,4   | 0,018996 | 0,471532 |                     |      |
| TC0800002437.mm.1 | 1,36 Unc13a     | PSR0800018622.mm.1 | 2,36  | 0,020965 | 0,479982 | Cassette Exon       | 0,29 |
| TC0800002437.mm.1 | 1,36 Unc13a     | PSR0800018623.mm.1 | 2,33  | 0,018262 | 0,467921 | Cassette Exon       | 0,15 |
| TC0800002437.mm.1 | 1,36 Unc13a     | JUC0800010109.mm.1 | 2,22  | 0,041762 | 0,545499 |                     |      |
| TC0800002437.mm.1 | 1,36 Unc13a     | PSR0800018593.mm.1 | 2,21  | 0,006037 | 0,386586 | Cassette Exon       | 0,35 |
| TC0800002437.mm.1 | 1,36 Unc13a     | PSR0800018650.mm.1 | -2,91 | 0,047275 | 0,558232 | Alternative 5' Donc | 0,31 |
| TC0800002437.mm.1 | 1,36 Unc13a     | JUC0800010151.mm.1 | -3,12 | 0,003196 | 0,354243 |                     |      |
| TC0500000011.mm.1 | -1,63 Fam133b   | JUC0500000023.mm.1 | 9,93  | 0,000802 | 0,311765 |                     |      |
| TC0500000011.mm.1 | -1,63 Fam133b   | JUC0500000027.mm.1 | 2,11  | 0,011449 | 0,427811 |                     |      |
| TC0100002324.mm.1 | -1 Mfsd6        | PSR0100018710.mm.1 | 9,78  | 0,001255 | 0,322251 | Cassette Exon       | 0,44 |
| TC0100002324.mm.1 | -1 Mfsd6        | JUC0100010583.mm.1 | 5,46  | 0,004544 | 0,368715 |                     |      |
| TC0100001011.mm.1 | -1,27 Tnfrsf11a | JUC0100004836.mm.1 | 9,78  | 0,018203 | 0,467586 |                     |      |
| TC1500001460.mm.1 | -1,25 Eif3e     | JUC1500006266.mm.1 | 9,75  | 0,005481 | 0,379939 |                     |      |
| TC1200000432.mm.1 | 2,52 Akap6      | JUC1200001703.mm.1 | 9,73  | 0,03119  | 0,515739 |                     |      |
| TC1200000432.mm.1 | 2,52 Akap6      | JUC1200001711.mm.1 | 3,01  | 0,049383 | 0,562882 |                     |      |
| TC1200000432.mm.1 | 2,52 Akap6      | JUC1200001714.mm.1 | -2,31 | 0,010117 | 0,41912  |                     |      |
| TC1200000432.mm.1 | 2,52 Akap6      | PSR1200003040.mm.1 | -2,64 | 0,013247 | 0,441416 | Cassette Exon       | 0,46 |
| TC1200000432.mm.1 | 2,52 Akap6      | JUC1200001716.mm.1 | -3,45 | 0,025714 | 0,498173 |                     |      |
| TC0600000493.mm.1 | 1,37 Cntnap2    | JUC0600001924.mm.1 | 9,61  | 0,002811 | 0,352207 |                     |      |
| TC0600000493.mm.1 | 1,37 Cntnap2    | JUC0600001925.mm.1 | 5,28  | 0,012962 | 0,43903  |                     |      |
| TC0600000493.mm.1 | 1,37 Cntnap2    | PSR0600003830.mm.1 | 4,65  | 0,006589 | 0,39213  | Cassette Exon       | 0,4  |
| TC0600000493.mm.1 | 1,37 Cntnap2    | PSR0600003832.mm.1 | 4,39  | 0,014833 | 0,451201 | Cassette Exon       | 0,55 |
| TC0600000493.mm.1 | 1,37 Cntnap2    | JUC0600001939.mm.1 | 4,32  | 0,004188 | 0,362794 |                     |      |
| TC0600000493.mm.1 | 1,37 Cntnap2    | PSR0600003833.mm.1 | 3,95  | 0,004849 | 0,37168  | Cassette Exon       | 0,39 |
| TC0600000493.mm.1 | 1,37 Cntnap2    | PSR0600003828.mm.1 | 3,47  | 0,00973  | 0,417839 | Cassette Exon       | 0,27 |
| TC0600000493.mm.1 | 1,37 Cntnap2    | JUC0600001933.mm.1 | 2,78  | 0,005464 | 0,379939 |                     |      |
| TC0600000493.mm.1 | 1,37 Cntnap2    | PSR0600003831.mm.1 | 2,64  | 0,015417 | 0,454055 | Cassette Exon       | 0,38 |
| TC0600000493.mm.1 | 1,37 Cntnap2    | JUC0600001930.mm.1 | 2,33  | 0,032361 | 0,519174 |                     |      |
| TC0600000493.mm.1 | 1,37 Cntnap2    | JUC0600001921.mm.1 | 2,23  | 0,030784 | 0,514144 |                     |      |
| TC0600000493.mm.1 | 1,37 Cntnap2    | JUC0600001934.mm.1 | 2,22  | 0,022884 | 0,488524 |                     |      |
| TC0600000493.mm.1 | 1,37 Cntnap2    | JUC0600001942.mm.1 | -2,21 | 0,029851 | 0,511132 |                     |      |
| TC0400002737.mm.1 | -1,81 lpar1     | JUC0400011514.mm.1 | 9,51  | 0,024117 | 0,49322  |                     |      |
| TC0400002737.mm.1 | -1,81 lpar1     | PSR0400022163.mm.1 | 2,27  | 0,007948 | 0,403819 | Alternative 3' Acce | 0,16 |
| TC0400002737.mm.1 | -1,81 lpar1     | PSR0400022160.mm.1 | 2,18  | 0,013795 | 0,444974 |                     |      |
| TC0400002737.mm.1 | -1,81 lpar1     | PSR0400022151.mm.1 | 2,09  | 0,01095  | 0,425009 | Cassette Exon       | 0,11 |

|                   |                              |                    |       |          |          |                     |      |
|-------------------|------------------------------|--------------------|-------|----------|----------|---------------------|------|
| TC0700004413.mm.1 | 2,07 Fam53b                  | JUC0700019548.mm.1 | 9,5   | 0,002641 | 0,349612 |                     |      |
| TC0700004413.mm.1 | 2,07 Fam53b                  | PSR0700037116.mm.1 | -2,08 | 0,029434 | 0,509995 | Cassette Exon       | 0,13 |
| TC0700004413.mm.1 | 2,07 Fam53b                  | PSR0700037110.mm.1 | -2,11 | 0,036027 | 0,529546 | Alternative 3' Acce | 0,18 |
| TC0700004413.mm.1 | 2,07 Fam53b                  | PSR0700037120.mm.1 | -2,25 | 0,045247 | 0,55367  | Cassette Exon       | 0,32 |
| TC0700004413.mm.1 | 2,07 Fam53b                  | PSR0700037131.mm.1 | -2,52 | 0,027262 | 0,503682 | Cassette Exon       | 0,14 |
| TC0700004413.mm.1 | 2,07 Fam53b                  | JUC0700019549.mm.1 | -3,7  | 0,02636  | 0,500927 |                     |      |
| TC0700004413.mm.1 | 2,07 Fam53b                  | PSR0700037129.mm.1 | -3,8  | 0,01735  | 0,46355  | Alternative 5' Donc | 0,31 |
| TC1200001127.mm.1 | 4,72 Meg3; Mir770; Mir1906-1 | PSR1200008076.mm.1 | 9,49  | 0,000968 | 0,313467 |                     |      |
| TC1200001127.mm.1 | 4,72 Meg3; Mir770; Mir1906-1 | PSR1200008071.mm.1 | 8,7   | 0,000071 | 0,251428 |                     |      |
| TC1200001127.mm.1 | 4,72 Meg3; Mir770; Mir1906-1 | PSR1200008078.mm.1 | 7,16  | 0,001364 | 0,32572  |                     |      |
| TC1200001127.mm.1 | 4,72 Meg3; Mir770; Mir1906-1 | PSR1200008070.mm.1 | 6,87  | 0,002239 | 0,34578  |                     |      |
| TC1200001127.mm.1 | 4,72 Meg3; Mir770; Mir1906-1 | PSR1200008073.mm.1 | 5,83  | 0,000649 | 0,304044 | Intron Retention    | 0,29 |
| TC1200001127.mm.1 | 4,72 Meg3; Mir770; Mir1906-1 | PSR1200008080.mm.1 | 5,5   | 0,001015 | 0,316361 |                     |      |
| TC1200001127.mm.1 | 4,72 Meg3; Mir770; Mir1906-1 | PSR1200008072.mm.1 | 4,51  | 0,000867 | 0,311909 | Cassette Exon       | 0,48 |
| TC1200001127.mm.1 | 4,72 Meg3; Mir770; Mir1906-1 | PSR1200008034.mm.1 | 4,1   | 0,007254 | 0,39826  |                     |      |
| TC1200001127.mm.1 | 4,72 Meg3; Mir770; Mir1906-1 | PSR1200008083.mm.1 | 3,97  | 0,005482 | 0,379939 |                     |      |
| TC1200001127.mm.1 | 4,72 Meg3; Mir770; Mir1906-1 | JUC1200004489.mm.1 | 3,92  | 0,04167  | 0,545356 |                     |      |
| TC1200001127.mm.1 | 4,72 Meg3; Mir770; Mir1906-1 | JUC1200004486.mm.1 | 3,86  | 0,024927 | 0,49582  |                     |      |
| TC1200001127.mm.1 | 4,72 Meg3; Mir770; Mir1906-1 | PSR1200008077.mm.1 | 3,64  | 0,000346 | 0,290082 |                     |      |
| TC1200001127.mm.1 | 4,72 Meg3; Mir770; Mir1906-1 | PSR1200008079.mm.1 | 2,95  | 0,007479 | 0,400381 |                     |      |
| TC1200001127.mm.1 | 4,72 Meg3; Mir770; Mir1906-1 | JUC1200004491.mm.1 | 2,93  | 0,010744 | 0,423772 |                     |      |
| TC1200001127.mm.1 | 4,72 Meg3; Mir770; Mir1906-1 | PSR1200008092.mm.1 | 2,74  | 0,005592 | 0,381035 |                     |      |
| TC1200001127.mm.1 | 4,72 Meg3; Mir770; Mir1906-1 | PSR1200008069.mm.1 | 2,34  | 0,020446 | 0,478018 |                     |      |
| TC1200001127.mm.1 | 4,72 Meg3; Mir770; Mir1906-1 | JUC1200004499.mm.1 | 2,24  | 0,016674 | 0,460085 |                     |      |
| TC1200001127.mm.1 | 4,72 Meg3; Mir770; Mir1906-1 | JUC1200004488.mm.1 | 2,07  | 0,004664 | 0,370181 |                     |      |
| TC1200001127.mm.1 | 4,72 Meg3; Mir770; Mir1906-1 | JUC1200004493.mm.1 | -2,05 | 0,00362  | 0,356223 |                     |      |
| TC1200001127.mm.1 | 4,72 Meg3; Mir770; Mir1906-1 | PSR1200008090.mm.1 | -2,36 | 0,002894 | 0,352207 |                     |      |
| TC1200001127.mm.1 | 4,72 Meg3; Mir770; Mir1906-1 | PSR1200008058.mm.1 | -2,48 | 0,014579 | 0,449876 | Intron Retention    | 0,09 |
| TC1200001127.mm.1 | 4,72 Meg3; Mir770; Mir1906-1 | PSR1200008093.mm.1 | -2,58 | 0,003921 | 0,359818 |                     |      |
| TC1200001127.mm.1 | 4,72 Meg3; Mir770; Mir1906-1 | PSR1200008022.mm.1 | -2,66 | 0,04036  | 0,541951 | Alternative 3' Acce | 0,3  |
| TC1200001127.mm.1 | 4,72 Meg3; Mir770; Mir1906-1 | PSR1200008104.mm.1 | -2,67 | 0,049148 | 0,562349 | Alternative 5' Donc | 0,28 |
| TC1200001127.mm.1 | 4,72 Meg3; Mir770; Mir1906-1 | PSR1200008027.mm.1 | -3,24 | 0,02989  | 0,511313 | Alternative 3' Acce | 0,3  |
| TC1200001127.mm.1 | 4,72 Meg3; Mir770; Mir1906-1 | PSR1200008052.mm.1 | -3,26 | 0,004567 | 0,369396 | Intron Retention    | 0,3  |
| TC1200001127.mm.1 | 4,72 Meg3; Mir770; Mir1906-1 | PSR1200008035.mm.1 | -3,64 | 0,038353 | 0,53622  | Cassette Exon       | 0,24 |
| TC1200001127.mm.1 | 4,72 Meg3; Mir770; Mir1906-1 | PSR1200008064.mm.1 | -3,96 | 0,008274 | 0,405976 | Intron Retention    | 0,56 |
| TC1200001127.mm.1 | 4,72 Meg3; Mir770; Mir1906-1 | PSR1200008032.mm.1 | -3,99 | 0,004248 | 0,363417 | Intron Retention    | 0,68 |
| TC1200001127.mm.1 | 4,72 Meg3; Mir770; Mir1906-1 | PSR1200008067.mm.1 | -4,75 | 0,023126 | 0,489756 | Intron Retention    | 0,65 |
| TC1200001127.mm.1 | 4,72 Meg3; Mir770; Mir1906-1 | PSR1200008103.mm.1 | -4,76 | 0,035683 | 0,529027 | Alternative 5' Donc | 0,28 |
| TC1200001127.mm.1 | 4,72 Meg3; Mir770; Mir1906-1 | PSR1200008029.mm.1 | -5,02 | 0,031377 | 0,516345 | Intron Retention    | 0,47 |
| TC1200001127.mm.1 | 4,72 Meg3; Mir770; Mir1906-1 | PSR1200008055.mm.1 | -5,04 | 0,001355 | 0,325439 | Intron Retention    | 0,74 |
| TC1200001127.mm.1 | 4,72 Meg3; Mir770; Mir1906-1 | JUC1200004494.mm.1 | -5,71 | 0,001668 | 0,335182 |                     |      |
| TC1200001127.mm.1 | 4,72 Meg3; Mir770; Mir1906-1 | JUC1200004502.mm.1 | -8,21 | 0,009054 | 0,412827 |                     |      |
| TC1200001127.mm.1 | 4,72 Meg3; Mir770; Mir1906-1 | PSR1200008043.mm.1 | -8,78 | 0,041799 | 0,545586 |                     |      |
| TC1700001780.mm.1 | 1,86 Cpne5                   | JUC1700008837.mm.1 | 9,44  | 0,033957 | 0,524252 |                     |      |
| TC1700001780.mm.1 | 1,86 Cpne5                   | JUC1700008850.mm.1 | -2,17 | 0,00569  | 0,382387 |                     |      |
| TC1700001780.mm.1 | 1,86 Cpne5                   | PSR1700016435.mm.1 | -2,34 | 0,00708  | 0,396891 | Alternative 5' Donc | 0,16 |
| TC1500001356.mm.1 | -1,17 Stk3                   | JUC1500005889.mm.1 | 9,44  | 0,007844 | 0,403342 |                     |      |
| TC1500001356.mm.1 | -1,17 Stk3                   | JUC1500005890.mm.1 | 4,76  | 0,02473  | 0,494862 |                     |      |



|                   |                               |                    |       |          |                              |      |
|-------------------|-------------------------------|--------------------|-------|----------|------------------------------|------|
| TC0300003077.mm.1 | -1,43 Sh3glb1                 | JUC0300012632.mm.1 | 9,41  | 0,00546  | 0,379939                     |      |
| TC0300003113.mm.1 | 1,73 Lphn2                    | JUC0300012863.mm.1 | 9,36  | 0,007874 | 0,403545                     |      |
| TC0300003113.mm.1 | 1,73 Lphn2                    | PSR0300024497.mm.1 | -2,08 | 0,000024 | 0,22008 Cassette Exon        | 0,18 |
| TC0300003113.mm.1 | 1,73 Lphn2                    | JUC0300012865.mm.1 | -2,08 | 0,00284  | 0,352207                     |      |
| TC0300003113.mm.1 | 1,73 Lphn2                    | JUC0300012861.mm.1 | -2,12 | 0,023151 | 0,489814                     |      |
| TC0300003113.mm.1 | 1,73 Lphn2                    | PSR0300024495.mm.1 | -2,18 | 0,000452 | 0,298307 Cassette Exon       | 0,13 |
| TC0300003113.mm.1 | 1,73 Lphn2                    | JUC0300012845.mm.1 | -2,21 | 0,00545  | 0,379939                     |      |
| TC0300003113.mm.1 | 1,73 Lphn2                    | JUC0300012838.mm.1 | -2,24 | 0,00495  | 0,373403                     |      |
| TC0300003113.mm.1 | 1,73 Lphn2                    | PSR0300024476.mm.1 | -2,28 | 0,000045 | 0,24627 Cassette Exon        | 0,13 |
| TC0300003113.mm.1 | 1,73 Lphn2                    | JUC0300012844.mm.1 | -2,33 | 0,037368 | 0,533674                     |      |
| TC0300003113.mm.1 | 1,73 Lphn2                    | PSR0300024480.mm.1 | -2,34 | 0,037745 | 0,53468 Intron Retention     | 0,26 |
| TC0300003113.mm.1 | 1,73 Lphn2                    | PSR0300024498.mm.1 | -2,4  | 0,001026 | 0,316361 Cassette Exon       | 0,19 |
| TC0300003113.mm.1 | 1,73 Lphn2                    | PSR0300024481.mm.1 | -2,52 | 0,018945 | 0,471398 Intron Retention    | 0,26 |
| TC0300003113.mm.1 | 1,73 Lphn2                    | PSR0300024504.mm.1 | -2,57 | 0,01488  | 0,451706 Cassette Exon       | 0,21 |
| TC0300003113.mm.1 | 1,73 Lphn2                    | JUC0300012853.mm.1 | -2,62 | 0,00051  | 0,303579                     |      |
| TC0300003113.mm.1 | 1,73 Lphn2                    | PSR0300024488.mm.1 | -3,05 | 0,007326 | 0,399002 Alternative 5' Donc | 0,26 |
| TC0300003113.mm.1 | 1,73 Lphn2                    | JUC0300012842.mm.1 | -3,77 | 0,010057 | 0,418902                     |      |
| TC0700002623.mm.1 | -1,14 Pou2f2; Mir6537; mmu-mi | JUC0700012037.mm.1 | 9,28  | 0,003262 | 0,354243                     |      |
| TC0700002623.mm.1 | -1,14 Pou2f2; Mir6537; mmu-mi | JUC0700012023.mm.1 | -2,44 | 0,033029 | 0,521496                     |      |
| TC1300002651.mm.1 | 4,73 Rab3c                    | JUC1300009622.mm.1 | 9,26  | 0,021032 | 0,480239                     |      |
| TC1300002651.mm.1 | 4,73 Rab3c                    | PSR1300017971.mm.1 | 2,34  | 0,019371 | 0,473624                     |      |
| TC1300002651.mm.1 | 4,73 Rab3c                    | PSR1300017972.mm.1 | -2,71 | 0,000861 | 0,311909 Cassette Exon       | 0,02 |
| TC1300002651.mm.1 | 4,73 Rab3c                    | JUC1300009623.mm.1 | -4,11 | 0,014114 | 0,447137                     |      |
| TC1300002651.mm.1 | 4,73 Rab3c                    | PSR1300017973.mm.1 | -5,21 | 0,005524 | 0,380518 Alternative 5' Donc | 0,21 |
| TC1300002651.mm.1 | 4,73 Rab3c                    | JUC1300009625.mm.1 | -5,95 | 0,022016 | 0,485226                     |      |
| TC1300002651.mm.1 | 4,73 Rab3c                    | PSR1300017974.mm.1 | -7,95 | 0,001504 | 0,329896 Cassette Exon       | 0,41 |
| TC1600000054.mm.1 | 1,19 Rbfox1                   | JUC1600000485.mm.1 | 9,23  | 0,000618 | 0,304044 Cassette Exon       | 0,55 |
| TC1600000054.mm.1 | 1,19 Rbfox1                   | JUC1600000269.mm.1 | 8,94  | 0,000085 | 0,255472                     |      |
| TC1600000054.mm.1 | 1,19 Rbfox1                   | JUC1600000247.mm.1 | 7,24  | 0,000004 | 0,179072                     |      |
| TC1600000054.mm.1 | 1,19 Rbfox1                   | JUC1600000248.mm.1 | 6,05  | 0,001961 | 0,340561                     |      |
| TC1600000054.mm.1 | 1,19 Rbfox1                   | JUC1600000270.mm.1 | 4,86  | 0,005129 | 0,376377                     |      |
| TC1600000054.mm.1 | 1,19 Rbfox1                   | JUC1600000259.mm.1 | 4,43  | 0,010085 | 0,418998                     |      |
| TC1600000054.mm.1 | 1,19 Rbfox1                   | JUC1600000264.mm.1 | 3,47  | 0,029267 | 0,509825                     |      |
| TC1600000054.mm.1 | 1,19 Rbfox1                   | PSR1600000498.mm.1 | 3,29  | 0,01446  | 0,44909 Cassette Exon        | 0,3  |
| TC1600000054.mm.1 | 1,19 Rbfox1                   | JUC1600000251.mm.1 | 3,03  | 0,019598 | 0,474724                     |      |
| TC1600000054.mm.1 | 1,19 Rbfox1                   | PSR1600000492.mm.1 | 2,46  | 0,004867 | 0,371692 Cassette Exon       | 0,38 |
| TC1600000054.mm.1 | 1,19 Rbfox1                   | JUC1600000254.mm.1 | 2,39  | 0,017706 | 0,465159                     |      |
| TC1600000054.mm.1 | 1,19 Rbfox1                   | JUC1600000260.mm.1 | 2,27  | 0,012454 | 0,43528                      |      |
| TC1600000054.mm.1 | 1,19 Rbfox1                   | PSR1600000512.mm.1 | -2,45 | 0,002177 | 0,344453 Cassette Exon       | 0,45 |
| TC1600000054.mm.1 | 1,19 Rbfox1                   | JUC1600000272.mm.1 | -2,81 | 0,020569 | 0,478426                     |      |
| TC0700004626.mm.1 | 2,59 Sez6l2                   | JUC0700008200.mm.1 | 9,23  | 0,026157 | 0,50003                      |      |
| TC0700004626.mm.1 | 2,59 Sez6l2                   | JUC0700008203.mm.1 | 8,83  | 0,007828 | 0,403089                     |      |
| TC0700004626.mm.1 | 2,59 Sez6l2                   | JUC0700008199.mm.1 | 4,85  | 0,020758 | 0,479262                     |      |
| TC0700004626.mm.1 | 2,59 Sez6l2                   | PSR0700015668.mm.1 | 3,71  | 0,010211 | 0,419922 Cassette Exon       | 0,46 |
| TC0700004626.mm.1 | 2,59 Sez6l2                   | PSR0700015670.mm.1 | 3,71  | 0,001203 | 0,322097 Cassette Exon       | 0,33 |
| TC0700004626.mm.1 | 2,59 Sez6l2                   | JUC0700008195.mm.1 | 3,69  | 0,001903 | 0,338712                     |      |
| TC0700004626.mm.1 | 2,59 Sez6l2                   | JUC0700008192.mm.1 | 3,12  | 0,041734 | 0,545403                     |      |
| TC0700004626.mm.1 | 2,59 Sez6l2                   | PSR0700015656.mm.1 | 2,65  | 0,030783 | 0,514144 Cassette Exon       | 0,32 |

|                   |                    |                    |       |          |                              |      |
|-------------------|--------------------|--------------------|-------|----------|------------------------------|------|
| TC0700004626.mm.1 | 2,59 Sez6l2        | PSR0700015657.mm.1 | 2,65  | 0,00474  | 0,370933 Cassette Exon       | 0,27 |
| TC0700004626.mm.1 | 2,59 Sez6l2        | JUC0700008204.mm.1 | 2,65  | 0,023072 | 0,489593                     |      |
| TC0700004626.mm.1 | 2,59 Sez6l2        | PSR0700015667.mm.1 | 2,37  | 0,045111 | 0,553206 Cassette Exon       | 0,26 |
| TC0700004626.mm.1 | 2,59 Sez6l2        | JUC0700008194.mm.1 | 2,07  | 0,019099 | 0,472222                     |      |
| TC0700004626.mm.1 | 2,59 Sez6l2        | PSR0700015674.mm.1 | -2,36 | 0,009831 | 0,417839 Alternative 5' Donc | 0,26 |
| TC0700004626.mm.1 | 2,59 Sez6l2        | PSR0700015666.mm.1 | -2,67 | 0,006952 | 0,395669 Alternative 3' Acce | 0,38 |
| TC0700004626.mm.1 | 2,59 Sez6l2        | PSR0700015641.mm.1 | -2,75 | 0,008213 | 0,405934 Alternative 3' Acce | 0,28 |
| TC0700004626.mm.1 | 2,59 Sez6l2        | JUC0700008202.mm.1 | -2,87 | 0,004092 | 0,36228                      |      |
| TC0700004626.mm.1 | 2,59 Sez6l2        | PSR0700015673.mm.1 | -2,9  | 0,00387  | 0,358872 Intron Retention    | 0,3  |
| TC0700004626.mm.1 | 2,59 Sez6l2        | PSR0700015649.mm.1 | -3,95 | 0,006671 | 0,393187 Alternative 5' Donc | 0,36 |
| TC0700004626.mm.1 | 2,59 Sez6l2        | PSR0700015665.mm.1 | -4,27 | 0,013147 | 0,440239 Alternative 3' Acce | 0,38 |
| TC0700004626.mm.1 | 2,59 Sez6l2        | PSR0700015655.mm.1 | -4,33 | 0,031634 | 0,517405 Alternative 5' Donc | 0,51 |
| TC0700004626.mm.1 | 2,59 Sez6l2        | PSR0700015638.mm.1 | -5,4  | 0,003899 | 0,35939 Alternative 3' Acce  | 0,41 |
| TC1300001448.mm.1 | -1,07 Lgals8       | JUC1300004839.mm.1 | 9,22  | 0,033349 | 0,522553                     |      |
| TC1300001448.mm.1 | -1,07 Lgals8       | PSR1300009224.mm.1 | 2,6   | 0,029854 | 0,511132 Alternative 3' Acce | 0,23 |
| TC1700001241.mm.1 | -1,1 Eml4          | JUC1700006303.mm.1 | 9,2   | 0,001027 | 0,316361                     |      |
| TC1700001241.mm.1 | -1,1 Eml4          | JUC1700006279.mm.1 | 3,98  | 0,030936 | 0,514624                     |      |
| TC0100002685.mm.1 | 1,34 Sphkap        | JUC0100012370.mm.1 | 9,18  | 0,001113 | 0,317328                     |      |
| TC0100002685.mm.1 | 1,34 Sphkap        | JUC0100012371.mm.1 | 8,95  | 0,002284 | 0,34605                      |      |
| TC0100003700.mm.1 | -1,02 Enah         | JUC0100017240.mm.1 | 9,17  | 0,035899 | 0,529399                     |      |
| TC0100003700.mm.1 | -1,02 Enah         | JUC0100017246.mm.1 | -2,18 | 0,015926 | 0,456718                     |      |
| TC0400001076.mm.1 | 2,32 Dab1          | JUC0400003773.mm.1 | 9,09  | 0,005451 | 0,379939                     |      |
| TC0400001076.mm.1 | 2,32 Dab1          | JUC0400003777.mm.1 | 3,61  | 0,00682  | 0,39387                      |      |
| TC0400001076.mm.1 | 2,32 Dab1          | PSR0400007382.mm.1 | 3,17  | 0,008302 | 0,406122 Cassette Exon       | 0,44 |
| TC0400001076.mm.1 | 2,32 Dab1          | PSR0400007386.mm.1 | 2,94  | 0,005713 | 0,38271 Cassette Exon        | 0,33 |
| TC0400001076.mm.1 | 2,32 Dab1          | JUC0400003770.mm.1 | -2,14 | 0,019882 | 0,475806                     |      |
| TC0400001076.mm.1 | 2,32 Dab1          | PSR0400007390.mm.1 | -2,5  | 0,036606 | 0,531472 Cassette Exon       | 0,14 |
| TC0400001076.mm.1 | 2,32 Dab1          | PSR0400007364.mm.1 | -2,78 | 0,042832 | 0,548097 Cassette Exon       | 0,3  |
| TC0400001076.mm.1 | 2,32 Dab1          | JUC0400003791.mm.1 | -3,14 | 0,020992 | 0,480143                     |      |
| TC0400001076.mm.1 | 2,32 Dab1          | JUC0400003768.mm.1 | -4,08 | 0,018046 | 0,467148                     |      |
| TC0700001916.mm.1 | 5,49 5430419D17Rik | JUC0700008907.mm.1 | 9,08  | 0,004053 | 0,361816                     |      |
| TC0700001916.mm.1 | 5,49 5430419D17Rik | JUC0700008915.mm.1 | 8,38  | 0,011281 | 0,426885                     |      |
| TC0700001916.mm.1 | 5,49 5430419D17Rik | PSR0700016812.mm.1 | 7,66  | 0,00174  | 0,335996 Cassette Exon       | 0,2  |
| TC0700001916.mm.1 | 5,49 5430419D17Rik | JUC0700008914.mm.1 | 6,72  | 0,03382  | 0,523933                     |      |
| TC0700001916.mm.1 | 5,49 5430419D17Rik | PSR0700016813.mm.1 | 6,61  | 0,003604 | 0,356223 Cassette Exon       | 0,33 |
| TC0700001916.mm.1 | 5,49 5430419D17Rik | JUC0700008908.mm.1 | 6,42  | 0,004292 | 0,363973                     |      |
| TC0700001916.mm.1 | 5,49 5430419D17Rik | PSR0700016824.mm.1 | 5,96  | 0,009606 | 0,417256 Cassette Exon       | 0,55 |
| TC0700001916.mm.1 | 5,49 5430419D17Rik | JUC0700008906.mm.1 | 5,64  | 0,008405 | 0,406611                     |      |
| TC0700001916.mm.1 | 5,49 5430419D17Rik | PSR0700016817.mm.1 | 3,55  | 0,047634 | 0,558743 Cassette Exon       | 0,27 |
| TC0700001916.mm.1 | 5,49 5430419D17Rik | PSR0700016825.mm.1 | 3,46  | 0,041837 | 0,545586 Cassette Exon       | 0,37 |
| TC0700001916.mm.1 | 5,49 5430419D17Rik | PSR0700016823.mm.1 | 3,11  | 0,039922 | 0,540966 Cassette Exon       | 0,33 |
| TC0700001916.mm.1 | 5,49 5430419D17Rik | PSR0700016815.mm.1 | 2,86  | 0,020141 | 0,477041 Cassette Exon       | 0,44 |
| TC0700001916.mm.1 | 5,49 5430419D17Rik | PSR0700016814.mm.1 | 2,84  | 0,009206 | 0,414013 Cassette Exon       | 0,44 |
| TC1400001456.mm.1 | 7,11 Cadps         | JUC1400005905.mm.1 | 9,06  | 0,000886 | 0,312614                     |      |
| TC1400001456.mm.1 | 7,11 Cadps         | JUC1400005906.mm.1 | 5,02  | 0,009764 | 0,417839                     |      |
| TC1400001456.mm.1 | 7,11 Cadps         | JUC1400005882.mm.1 | 3,2   | 0,000065 | 0,250119                     |      |
| TC1400001456.mm.1 | 7,11 Cadps         | PSR1400010959.mm.1 | 2,75  | 0,001913 | 0,339584 Cassette Exon       | 0,22 |
| TC1400001456.mm.1 | 7,11 Cadps         | PSR1400010969.mm.1 | 2,66  | 0,01164  | 0,42984 Cassette Exon        | 0,12 |

|                   |       |                       |                    |        |          |          |               |      |
|-------------------|-------|-----------------------|--------------------|--------|----------|----------|---------------|------|
| TC1400001456.mm.1 | 7,11  | Cadps                 | JUC1400005887.mm.1 | 2,38   | 0,00395  | 0,359922 |               |      |
| TC1400001456.mm.1 | 7,11  | Cadps                 | PSR1400010960.mm.1 | 2,19   | 0,000895 | 0,313363 |               |      |
| TC1400001456.mm.1 | 7,11  | Cadps                 | JUC1400005895.mm.1 | -2,19  | 0,006602 | 0,39213  |               |      |
| TC1400001456.mm.1 | 7,11  | Cadps                 | JUC1400005889.mm.1 | -2,71  | 0,001257 | 0,322251 |               |      |
| TC1400001456.mm.1 | 7,11  | Cadps                 | PSR1400010977.mm.1 | -2,86  | 0,015402 | 0,453964 | Cassette Exon | 0,28 |
| TC1400001456.mm.1 | 7,11  | Cadps                 | JUC1400005899.mm.1 | -2,93  | 0,017986 | 0,466929 |               |      |
| TC1400001456.mm.1 | 7,11  | Cadps                 | JUC1400005902.mm.1 | -3,27  | 0,025498 | 0,497664 |               |      |
| TC1400001456.mm.1 | 7,11  | Cadps                 | JUC1400005916.mm.1 | -3,71  | 0,027126 | 0,503022 |               |      |
| TC1400001456.mm.1 | 7,11  | Cadps                 | PSR1400010976.mm.1 | -3,72  | 0,001275 | 0,322251 | Cassette Exon | 0,33 |
| TC1400001456.mm.1 | 7,11  | Cadps                 | PSR1400010956.mm.1 | -4,12  | 0,001627 | 0,332831 | Cassette Exon | 0,75 |
| TC1400001456.mm.1 | 7,11  | Cadps                 | PSR1400010971.mm.1 | -4,15  | 0,005953 | 0,385276 | Cassette Exon | 0,36 |
| TC1400001456.mm.1 | 7,11  | Cadps                 | JUC1400005891.mm.1 | -5,25  | 0,018047 | 0,467148 |               |      |
| TC1400001456.mm.1 | 7,11  | Cadps                 | JUC1400005886.mm.1 | -5,63  | 0,027276 | 0,503732 |               |      |
| TC1400001456.mm.1 | 7,11  | Cadps                 | JUC1400005901.mm.1 | -6,12  | 0,003174 | 0,354243 |               |      |
| TC1400001456.mm.1 | 7,11  | Cadps                 | JUC1400005890.mm.1 | -6,16  | 0,000699 | 0,30566  |               |      |
| TC1400001456.mm.1 | 7,11  | Cadps                 | PSR1400010945.mm.1 | -6,9   | 0,001345 | 0,325349 | Cassette Exon | 0,41 |
| TC1400001456.mm.1 | 7,11  | Cadps                 | PSR1400010979.mm.1 | -6,97  | 0,002623 | 0,349612 | Cassette Exon | 0,41 |
| TC1400001456.mm.1 | 7,11  | Cadps                 | JUC1400005914.mm.1 | -7,91  | 0,029376 | 0,509995 |               |      |
| TC1400001456.mm.1 | 7,11  | Cadps                 | JUC1400005909.mm.1 | -10,93 | 0,007796 | 0,403089 |               |      |
| TC1400001456.mm.1 | 7,11  | Cadps                 | JUC1400005913.mm.1 | -12,13 | 0,000894 | 0,313363 |               |      |
| TC1400001456.mm.1 | 7,11  | Cadps                 | JUC1400005885.mm.1 | -12,47 | 0,033872 | 0,524121 |               |      |
| TC0800001055.mm.1 | 1,01  | Rbl2                  | JUC0800004357.mm.1 | 9,04   | 0,002747 | 0,349833 |               |      |
| TC0400000727.mm.1 | -1,06 | Gm11482; LOC102632940 | JUC0400002671.mm.1 | 8,98   | 0,010496 | 0,422028 |               |      |
| TC0700001741.mm.1 | -1,04 | Otoa                  | JUC0700007761.mm.1 | 8,97   | 0,010631 | 0,422841 |               |      |
| TC0700001741.mm.1 | -1,04 | Otoa                  | JUC0700007747.mm.1 | 3,12   | 0,005036 | 0,374502 |               |      |
| TC1600001184.mm.1 | 1,26  | Grin2a                | JUC1600004923.mm.1 | 8,89   | 0,000927 | 0,313363 |               |      |
| TC1600001184.mm.1 | 1,26  | Grin2a                | JUC1600004930.mm.1 | 2,97   | 0,031048 | 0,515019 |               |      |
| TC1600001184.mm.1 | 1,26  | Grin2a                | JUC1600004922.mm.1 | 2,53   | 0,021561 | 0,483034 |               |      |
| TC1600001184.mm.1 | 1,26  | Grin2a                | JUC1600004920.mm.1 | 2,2    | 0,003866 | 0,358861 |               |      |
| TC1600001184.mm.1 | 1,26  | Grin2a                | JUC1600004926.mm.1 | -2,78  | 0,01033  | 0,42079  |               |      |
| TC0500000112.mm.1 | -1,09 | Cacna2d1              | JUC0500000571.mm.1 | 8,87   | 0,000277 | 0,28803  |               |      |
| TC0500000112.mm.1 | -1,09 | Cacna2d1              | JUC0500000541.mm.1 | 3,92   | 0,001886 | 0,338712 |               |      |
| TC0500000112.mm.1 | -1,09 | Cacna2d1              | JUC0500000533.mm.1 | 2,22   | 0,02398  | 0,492734 |               |      |
| TC0500000112.mm.1 | -1,09 | Cacna2d1              | JUC0500000549.mm.1 | -2,43  | 0,039091 | 0,538395 |               |      |
| TC1800001660.mm.1 | 1,19  | Ctdp1                 | JUC1800006615.mm.1 | 8,84   | 0,014144 | 0,447466 |               |      |
| TC1600001750.mm.1 | -1,13 | Tfg                   | JUC1600007385.mm.1 | 8,82   | 0,00203  | 0,341377 |               |      |
| TC1600001750.mm.1 | -1,13 | Tfg                   | PSR1600014189.mm.1 | 5,77   | 0,016984 | 0,461441 | Cassette Exon | 0,45 |
| TC0600001634.mm.1 | 1,85  | Ptpro                 | JUC0600006787.mm.1 | 8,73   | 0,006611 | 0,392269 |               |      |
| TC0600001634.mm.1 | 1,85  | Ptpro                 | JUC0600006788.mm.1 | 6,65   | 0,031263 | 0,516001 |               |      |
| TC0600001634.mm.1 | 1,85  | Ptpro                 | JUC0600006786.mm.1 | 3,97   | 0,009972 | 0,418446 |               |      |
| TC0600001634.mm.1 | 1,85  | Ptpro                 | PSR0600012987.mm.1 | 3,49   | 0,004268 | 0,363868 | Cassette Exon | 0,23 |
| TC0600001634.mm.1 | 1,85  | Ptpro                 | JUC0600006793.mm.1 | 3,21   | 0,01643  | 0,459007 |               |      |
| TC0600001634.mm.1 | 1,85  | Ptpro                 | JUC0600006794.mm.1 | 2,88   | 0,035725 | 0,529027 |               |      |
| TC0600001634.mm.1 | 1,85  | Ptpro                 | JUC0600006802.mm.1 | 2,7    | 0,017448 | 0,463886 |               |      |
| TC0600001634.mm.1 | 1,85  | Ptpro                 | PSR0600012985.mm.1 | 2,62   | 0,012011 | 0,432286 | Cassette Exon | 0,42 |
| TC0600001634.mm.1 | 1,85  | Ptpro                 | PSR0600012984.mm.1 | 2,32   | 0,047442 | 0,558383 | Cassette Exon | 0,39 |
| TC0600001634.mm.1 | 1,85  | Ptpro                 | PSR0600012997.mm.1 | -2,02  | 0,020957 | 0,479982 | Cassette Exon | 0,03 |
| TC0600001634.mm.1 | 1,85  | Ptpro                 | JUC0600006790.mm.1 | -2,19  | 0,031257 | 0,516001 |               |      |

|                   |       |                        |                    |       |          |          |                     |      |
|-------------------|-------|------------------------|--------------------|-------|----------|----------|---------------------|------|
| TC0600001634.mm.1 | 1,85  | Ptpro                  | PSR0600013009.mm.1 | -2,37 | 0,001339 | 0,325349 | Cassette Exon       | 0,23 |
| TC0600001634.mm.1 | 1,85  | Ptpro                  | PSR0600013012.mm.1 | -2,38 | 0,000425 | 0,297771 | Cassette Exon       | 0,16 |
| TC0600001634.mm.1 | 1,85  | Ptpro                  | PSR0600012983.mm.1 | -2,38 | 0,005255 | 0,377909 | Cassette Exon       | 0,02 |
| TC0600001634.mm.1 | 1,85  | Ptpro                  | PSR0600013006.mm.1 | -2,73 | 0,000965 | 0,313363 | Cassette Exon       | 0,17 |
| TC0600001634.mm.1 | 1,85  | Ptpro                  | PSR0600012982.mm.1 | -2,84 | 0,004988 | 0,373851 | Alternative 3' Acce | 0,07 |
| TC0600001634.mm.1 | 1,85  | Ptpro                  | JUC0600006809.mm.1 | -3,27 | 0,011182 | 0,426414 |                     |      |
| TC0600001634.mm.1 | 1,85  | Ptpro                  | JUC0600006803.mm.1 | -3,32 | 0,016297 | 0,458465 |                     |      |
| TC0600001634.mm.1 | 1,85  | Ptpro                  | JUC0600006797.mm.1 | -4,11 | 0,026691 | 0,502057 |                     |      |
| TC0600001634.mm.1 | 1,85  | Ptpro                  | JUC0600006791.mm.1 | -5,22 | 0,028984 | 0,508806 |                     |      |
| TC0600001634.mm.1 | 1,85  | Ptpro                  | JUC0600006795.mm.1 | -5,33 | 0,043886 | 0,550573 |                     |      |
| TC0600001634.mm.1 | 1,85  | Ptpro                  | JUC0600006789.mm.1 | -6,11 | 0,033863 | 0,524062 |                     |      |
| TC0600001634.mm.1 | 1,85  | Ptpro                  | JUC0600006813.mm.1 | -9,04 | 0,008323 | 0,406313 |                     |      |
| TC1700000493.mm.1 | 1,02  | Gm16195                | JUC1700002358.mm.1 | 8,68  | 0,014338 | 0,448173 |                     |      |
| TC1400001621.mm.1 | -1,1  | Slmap                  | JUC1400006602.mm.1 | 8,66  | 0,000138 | 0,272178 |                     |      |
| TC1400001621.mm.1 | -1,1  | Slmap                  | PSR1400012214.mm.1 | 2,22  | 0,028135 | 0,506248 | Cassette Exon       | 0,24 |
| TC0200000909.mm.1 | 1,07  | March7                 | PSR0200007293.mm.1 | 8,55  | 0,015912 | 0,456594 | Cassette Exon       | 0,26 |
| TC1100001630.mm.1 | -1,29 | Gm11547; LOC102636037  | JUC1100007831.mm.1 | 8,53  | 0,00895  | 0,411427 |                     |      |
| TC0X00002482.mm.1 | -1,64 | Pls3                   | JUC0X00008121.mm.1 | 8,51  | 0,01397  | 0,446239 |                     |      |
| TC0X00002482.mm.1 | -1,64 | Pls3                   | JUC0X00008122.mm.1 | 3,56  | 0,039333 | 0,539324 |                     |      |
| TC0X00002482.mm.1 | -1,64 | Pls3                   | JUC0X00008115.mm.1 | 3,14  | 0,028577 | 0,507603 |                     |      |
| TC0600000374.mm.1 | 1,3   | Ttc26                  | JUC0600001433.mm.1 | 8,47  | 0,018991 | 0,471485 |                     |      |
| TC0600000374.mm.1 | 1,3   | Ttc26                  | JUC0600001432.mm.1 | -2,03 | 0,004749 | 0,371039 |                     |      |
| TC0600000374.mm.1 | 1,3   | Ttc26                  | JUC0600001419.mm.1 | -2,13 | 0,012588 | 0,435924 |                     |      |
| TC0600000374.mm.1 | 1,3   | Ttc26                  | PSR0600002798.mm.1 | -2,32 | 0,01092  | 0,424705 | Alternative 5' Donc | 0,16 |
| TC0700004492.mm.1 | 1,78  | Caly                   | JUC0700019900.mm.1 | 8,41  | 0,003588 | 0,356223 |                     |      |
| TC0700004492.mm.1 | 1,78  | Caly                   | JUC0700019902.mm.1 | 4,42  | 0,006199 | 0,387873 |                     |      |
| TC0700004492.mm.1 | 1,78  | Caly                   | PSR0700037720.mm.1 | 4,1   | 0,004193 | 0,362939 | Cassette Exon       | 0,41 |
| TC0700004492.mm.1 | 1,78  | Caly                   | PSR0700037726.mm.1 | -2,22 | 0,00898  | 0,411895 | Cassette Exon       | 0,1  |
| TC0700004492.mm.1 | 1,78  | Caly                   | JUC0700019899.mm.1 | -2,25 | 0,003128 | 0,353892 |                     |      |
| TC0700004492.mm.1 | 1,78  | Caly                   | PSR0700037723.mm.1 | -2,33 | 0,000532 | 0,304044 | Alternative 3' Acce | 0,09 |
| TC0700004492.mm.1 | 1,78  | Caly                   | JUC0700019903.mm.1 | -3,23 | 0,017687 | 0,465014 |                     |      |
| TC0900003043.mm.1 | 1,16  | Rbm5                   | JUC0900014314.mm.1 | 8,4   | 0,029701 | 0,510949 |                     |      |
| TC1300000262.mm.1 | 1,11  | Hist1h1a               | PSR1300001461.mm.1 | 8,39  | 0,045789 | 0,554863 | Alternative 3' Acce | 0,47 |
| TC1700000650.mm.1 | 1,47  | Ehmt2                  | JUC1700003571.mm.1 | 8,39  | 0,00507  | 0,375237 |                     |      |
| TC1700000650.mm.1 | 1,47  | Ehmt2                  | JUC1700003570.mm.1 | 3,17  | 0,00285  | 0,352207 |                     |      |
| TC0200001378.mm.1 | 1,16  | Ckap5; Snord67         | JUC0200005463.mm.1 | 8,38  | 0,001039 | 0,316361 |                     |      |
| TC0200001378.mm.1 | 1,16  | Ckap5; Snord67         | JUC0200005460.mm.1 | -3,14 | 0,015293 | 0,453368 |                     |      |
| TC0700003372.mm.1 | 1,75  | A230057D06Rik; Mir344c | JUC0700015258.mm.1 | 8,31  | 0,027955 | 0,505663 |                     |      |
| TC0700003372.mm.1 | 1,75  | A230057D06Rik; Mir344c | JUC0700015265.mm.1 | 4,84  | 0,001584 | 0,331726 |                     |      |
| TC0700003372.mm.1 | 1,75  | A230057D06Rik; Mir344c | JUC0700015272.mm.1 | 4,78  | 0,000558 | 0,304044 |                     |      |
| TC0700003372.mm.1 | 1,75  | A230057D06Rik; Mir344c | PSR0700028891.mm.1 | 4,5   | 0,000759 | 0,308387 | Cassette Exon       | 0,55 |
| TC0700003372.mm.1 | 1,75  | A230057D06Rik; Mir344c | JUC0700015268.mm.1 | 4,14  | 0,002865 | 0,352207 |                     |      |
| TC0700003372.mm.1 | 1,75  | A230057D06Rik; Mir344c | PSR0700028893.mm.1 | 3,12  | 0,004294 | 0,364023 |                     |      |
| TC0700003372.mm.1 | 1,75  | A230057D06Rik; Mir344c | JUC0700015276.mm.1 | 2,93  | 0,011065 | 0,425887 |                     |      |
| TC0700003372.mm.1 | 1,75  | A230057D06Rik; Mir344c | PSR0700028898.mm.1 | 2,69  | 0,011396 | 0,427549 | Cassette Exon       | 0,21 |
| TC0700003372.mm.1 | 1,75  | A230057D06Rik; Mir344c | PSR0700028903.mm.1 | 2,5   | 0,014888 | 0,451777 | Cassette Exon       | 0,32 |
| TC0700003372.mm.1 | 1,75  | A230057D06Rik; Mir344c | PSR0700028890.mm.1 | 2,41  | 0,040784 | 0,54318  |                     |      |
| TC0700003372.mm.1 | 1,75  | A230057D06Rik; Mir344c | PSR0700028914.mm.1 | 2,02  | 0,03065  | 0,513785 | Cassette Exon       | 0,09 |

|                   |       |                        |                    |       |          |          |                     |      |
|-------------------|-------|------------------------|--------------------|-------|----------|----------|---------------------|------|
| TC0700003372.mm.1 | 1,75  | A230057D06Rik; Mir344c | PSR0700028901.mm.1 | -2,11 | 0,013154 | 0,440265 | Alternative 3' Acce | 0,18 |
| TC0700003372.mm.1 | 1,75  | A230057D06Rik; Mir344c | PSR0700028918.mm.1 | -2,14 | 0,012987 | 0,439245 |                     |      |
| TC0700003372.mm.1 | 1,75  | A230057D06Rik; Mir344c | PSR0700028865.mm.1 | -2,15 | 0,007535 | 0,401261 | Cassette Exon       | 0,1  |
| TC0700003372.mm.1 | 1,75  | A230057D06Rik; Mir344c | PSR0700028916.mm.1 | -2,16 | 0,004043 | 0,36172  | Alternative 5' Donc | 0,17 |
| TC0700003372.mm.1 | 1,75  | A230057D06Rik; Mir344c | JUC0700015269.mm.1 | -2,16 | 0,049859 | 0,563773 |                     |      |
| TC0700003372.mm.1 | 1,75  | A230057D06Rik; Mir344c | PSR0700028868.mm.1 | -2,25 | 0,00294  | 0,352501 | Alternative 3' Acce | 0,15 |
| TC0700003372.mm.1 | 1,75  | A230057D06Rik; Mir344c | PSR0700028871.mm.1 | -2,43 | 0,006839 | 0,393893 | Cassette Exon       | 0,27 |
| TC0700003372.mm.1 | 1,75  | A230057D06Rik; Mir344c | PSR0700028878.mm.1 | -2,44 | 0,005858 | 0,383747 | Cassette Exon       | 0,13 |
| TC0700003372.mm.1 | 1,75  | A230057D06Rik; Mir344c | JUC0700015262.mm.1 | -3,07 | 0,004936 | 0,373093 |                     |      |
| TC0700003372.mm.1 | 1,75  | A230057D06Rik; Mir344c | JUC0700015256.mm.1 | -6,01 | 0,02309  | 0,489699 |                     |      |
| TC0X00000078.mm.1 | 4,24  | Pcsk1n                 | JUC0X00000287.mm.1 | 8,26  | 0,000706 | 0,306015 |                     |      |
| TC0X00000078.mm.1 | 4,24  | Pcsk1n                 | PSR0X00000615.mm.1 | 2,8   | 0,004192 | 0,362939 | Cassette Exon       | 0,3  |
| TC0X00000078.mm.1 | 4,24  | Pcsk1n                 | PSR0X00000612.mm.1 | -3,2  | 0,003309 | 0,354243 | Alternative 3' Acce | 0,31 |
| TC0X00000078.mm.1 | 4,24  | Pcsk1n                 | PSR0X00000616.mm.1 | -3,99 | 0,001059 | 0,316361 | Alternative 5' Donc | 0,48 |
| TC0600003050.mm.1 | -1,15 | Mical3                 | PSR0600023576.mm.1 | 8,24  | 0,016236 | 0,458312 | Cassette Exon       | 0,29 |
| TC1400002151.mm.1 | -1,23 | Zdhhc20; Gm22738       | JUC1400009067.mm.1 | 8,24  | 0,009121 | 0,413316 |                     |      |
| TC1400002151.mm.1 | -1,23 | Zdhhc20; Gm22738       | JUC1400009066.mm.1 | 2,89  | 0,035415 | 0,528667 |                     |      |
| TC1400000479.mm.1 | 2,43  | Gpr137c                | JUC1400002324.mm.1 | 8,19  | 0,000993 | 0,316361 |                     |      |
| TC1400000479.mm.1 | 2,43  | Gpr137c                | JUC1400002325.mm.1 | 4,03  | 0,01224  | 0,433659 |                     |      |
| TC1400000479.mm.1 | 2,43  | Gpr137c                | PSR1400003939.mm.1 | 2,1   | 0,002214 | 0,34564  | Cassette Exon       | 0,37 |
| TC1400000479.mm.1 | 2,43  | Gpr137c                | JUC1400002322.mm.1 | -3,17 | 0,017508 | 0,463964 |                     |      |
| TC1400000479.mm.1 | 2,43  | Gpr137c                | PSR1400003933.mm.1 | -3,38 | 0,017114 | 0,46232  | Alternative 3' Acce | 0,24 |
| TC1700002800.mm.1 | 1,81  | Mapk8ip3               | JUC1700008069.mm.1 | 8,16  | 0,005143 | 0,376442 |                     |      |
| TC1700002800.mm.1 | 1,81  | Mapk8ip3               | JUC1700008071.mm.1 | 5,75  | 0,003811 | 0,358103 |                     |      |
| TC1700002800.mm.1 | 1,81  | Mapk8ip3               | JUC1700008072.mm.1 | 2,09  | 0,027114 | 0,503022 |                     |      |
| TC1700002800.mm.1 | 1,81  | Mapk8ip3               | JUC1700008054.mm.1 | -2,2  | 0,026316 | 0,500721 |                     |      |
| TC1700002800.mm.1 | 1,81  | Mapk8ip3               | PSR1700014807.mm.1 | -2,66 | 0,012637 | 0,436161 | Intron Retention    | 0,37 |
| TC1700002800.mm.1 | 1,81  | Mapk8ip3               | PSR1700014802.mm.1 | -2,68 | 0,008409 | 0,406611 | Intron Retention    | 0,42 |
| TC1700002800.mm.1 | 1,81  | Mapk8ip3               | PSR1700014781.mm.1 | -2,86 | 0,001024 | 0,316361 | Alternative 3' Acce | 0,28 |
| TC1700002800.mm.1 | 1,81  | Mapk8ip3               | JUC1700008063.mm.1 | -2,86 | 0,004161 | 0,3623   |                     |      |
| TC0X00003301.mm.1 | -1,06 | Reps2                  | JUC0X00010403.mm.1 | 8,15  | 0,00436  | 0,365487 |                     |      |
| TC0200005052.mm.1 | -1,63 | Mafb                   | PSR0200043184.mm.1 | 8,12  | 0,021902 | 0,484824 | Alternative 3' Acce | 0,47 |
| TC0500000640.mm.1 | 6,26  | Uchl1                  | PSR0500005630.mm.1 | 8,11  | 0,001086 | 0,317191 | Cassette Exon       | 0,42 |
| TC0500000640.mm.1 | 6,26  | Uchl1                  | JUC0500003111.mm.1 | 8,11  | 0,003675 | 0,357266 |                     |      |
| TC0500000640.mm.1 | 6,26  | Uchl1                  | JUC0500003108.mm.1 | 4,19  | 0,001585 | 0,331726 |                     |      |
| TC0500000640.mm.1 | 6,26  | Uchl1                  | PSR0500005627.mm.1 | 2,83  | 0,002816 | 0,352207 | Cassette Exon       | 0,3  |
| TC0500000640.mm.1 | 6,26  | Uchl1                  | PSR0500005629.mm.1 | -2,23 | 0,024761 | 0,495014 |                     |      |
| TC0500000640.mm.1 | 6,26  | Uchl1                  | PSR0500005626.mm.1 | -2,71 | 0,000683 | 0,304417 | Cassette Exon       | 0,08 |
| TC0500000640.mm.1 | 6,26  | Uchl1                  | PSR0500005622.mm.1 | -2,96 | 0,011942 | 0,431753 | Cassette Exon       | 0,36 |
| TC0500000640.mm.1 | 6,26  | Uchl1                  | JUC0500003106.mm.1 | -3,82 | 0,009717 | 0,417826 |                     |      |
| TC0500000640.mm.1 | 6,26  | Uchl1                  | PSR0500005625.mm.1 | -4,26 | 0,005542 | 0,380603 | Alternative 3' Acce | 0,21 |
| TC0500000640.mm.1 | 6,26  | Uchl1                  | PSR0500005624.mm.1 | -5,01 | 0,00215  | 0,343679 | Cassette Exon       | 0,4  |
| TC0500000640.mm.1 | 6,26  | Uchl1                  | PSR0500005620.mm.1 | -5,23 | 0,002788 | 0,351436 | Cassette Exon       | 0,36 |
| TC0300001049.mm.1 | -1,09 | Trim33                 | JUC0300004399.mm.1 | 8,11  | 0,013812 | 0,445064 |                     |      |
| TC0300001049.mm.1 | -1,09 | Trim33                 | PSR0300008491.mm.1 | 2,02  | 0,038439 | 0,536405 | Alternative 3' Acce | 0,06 |
| TC0X00003418.mm.1 | 1,68  | Rpgr                   | JUC0X00005956.mm.1 | 8,01  | 0,045531 | 0,554359 |                     |      |
| TC0X00003418.mm.1 | 1,68  | Rpgr                   | PSR0X00011781.mm.1 | 3,16  | 0,014732 | 0,450542 | Cassette Exon       | 0,14 |
| TC0X00003418.mm.1 | 1,68  | Rpgr                   | PSR0X00011801.mm.1 | -2,06 | 0,011127 | 0,426023 | Cassette Exon       | 0,1  |

|                   |                |                    |       |          |                              |      |
|-------------------|----------------|--------------------|-------|----------|------------------------------|------|
| TCOX00003418.mm.1 | 1,68 Rpgr      | JUCOX00005945.mm.1 | -2,3  | 0,04942  | 0,563031                     |      |
| TCOX00003418.mm.1 | 1,68 Rpgr      | PSROX00011805.mm.1 | -3,19 | 0,023211 | 0,490032 Alternative 5' Donc | 0,31 |
| TCOX00003418.mm.1 | 1,68 Rpgr      | JUCOX00005946.mm.1 | -5,96 | 0,018521 | 0,469138                     |      |
| TCOX00003418.mm.1 | 1,68 Rpgr      | JUCOX00005961.mm.1 | -6,52 | 0,048382 | 0,560607                     |      |
| TC0800001432.mm.1 | -1,34 Crispld2 | JUC0800006438.mm.1 | 7,94  | 0,002357 | 0,34829                      |      |
| TC0800002300.mm.1 | -1,19 Palld    | JUC0800009423.mm.1 | 7,94  | 0,023859 | 0,492097                     |      |
| TC0800002300.mm.1 | -1,19 Palld    | JUC0800009413.mm.1 | 3,05  | 0,023222 | 0,490032                     |      |
| TC0900002165.mm.1 | 1,02 Ccdc84    | JUC0900010135.mm.1 | 7,92  | 0,008868 | 0,410539                     |      |
| TC1200000035.mm.1 | -1,12          | JUC1200000239.mm.1 | 7,87  | 0,031998 | 0,518342                     |      |
| TC0300003054.mm.1 | -1,14 Pkn2     | JUC0300012566.mm.1 | 7,87  | 0,033029 | 0,521496                     |      |
| TC0200003080.mm.1 | -1,25 Arhgap21 | JUC0200012757.mm.1 | 7,86  | 0,002146 | 0,343679                     |      |
| TC0200003080.mm.1 | -1,25 Arhgap21 | JUC0200012756.mm.1 | 3,24  | 0,009326 | 0,414973                     |      |
| TC0200003080.mm.1 | -1,25 Arhgap21 | PSR0200025224.mm.1 | 2,31  | 0,032832 | 0,520896 Cassette Exon       | 0,38 |
| TC0200003080.mm.1 | -1,25 Arhgap21 | JUC0200012761.mm.1 | -2,55 | 0,013021 | 0,439354                     |      |
| TC0200003632.mm.1 | 2,8 Kcnh7      | JUC0200015768.mm.1 | 7,82  | 0,001445 | 0,328204                     |      |
| TC0200003632.mm.1 | 2,8 Kcnh7      | JUC0200015769.mm.1 | 3,34  | 0,024368 | 0,49362                      |      |
| TC0200003632.mm.1 | 2,8 Kcnh7      | JUC0200015763.mm.1 | 2,59  | 0,019392 | 0,473723                     |      |
| TC0200003632.mm.1 | 2,8 Kcnh7      | PSR0200031038.mm.1 | -2,1  | 0,010067 | 0,418961 Cassette Exon       | 0,04 |
| TC0200003632.mm.1 | 2,8 Kcnh7      | PSR0200031031.mm.1 | -2,18 | 0,016509 | 0,459483 Cassette Exon       | 0,11 |
| TC0200003632.mm.1 | 2,8 Kcnh7      | JUC0200015756.mm.1 | -2,29 | 0,040109 | 0,541482                     |      |
| TC0200003632.mm.1 | 2,8 Kcnh7      | PSR0200031019.mm.1 | -2,32 | 0,044504 | 0,551751 Cassette Exon       | 0,18 |
| TC0200003632.mm.1 | 2,8 Kcnh7      | PSR0200031021.mm.1 | -2,42 | 0,006397 | 0,389654 Cassette Exon       | 0,14 |
| TC0200003632.mm.1 | 2,8 Kcnh7      | PSR0200031028.mm.1 | -5,5  | 0,003742 | 0,357586 Alternative 3' Acce | 0,46 |
| TC0600001922.mm.1 | 2,84 Fam3c     | JUC0600007871.mm.1 | 7,82  | 0,000866 | 0,311909                     |      |
| TC0600001922.mm.1 | 2,84 Fam3c     | PSR0600015036.mm.1 | 2,97  | 0,006891 | 0,394558 Cassette Exon       | 0,22 |
| TC0600001922.mm.1 | 2,84 Fam3c     | PSR0600015041.mm.1 | -2,28 | 0,018526 | 0,46918 Alternative 3' Acce  | 0,2  |
| TC0600001922.mm.1 | 2,84 Fam3c     | PSR0600015034.mm.1 | -2,41 | 0,046063 | 0,555645 Cassette Exon       | 0,17 |
| TC0600001922.mm.1 | 2,84 Fam3c     | PSR0600015048.mm.1 | -2,49 | 0,035117 | 0,527689 Cassette Exon       | 0,15 |
| TC0600001922.mm.1 | 2,84 Fam3c     | PSR0600015047.mm.1 | -2,61 | 0,028348 | 0,506843 Cassette Exon       | 0,15 |
| TC0600001922.mm.1 | 2,84 Fam3c     | PSR0600015044.mm.1 | -2,69 | 0,02086  | 0,479521 Cassette Exon       | 0,24 |
| TC0600001922.mm.1 | 2,84 Fam3c     | JUC0600007868.mm.1 | -2,83 | 0,018524 | 0,469156                     |      |
| TC0600001922.mm.1 | 2,84 Fam3c     | PSR0600015040.mm.1 | -3,63 | 0,002079 | 0,342181 Cassette Exon       | 0,14 |
| TC0400003653.mm.1 | 2,08 Epb4.1    | JUC0400015597.mm.1 | 7,81  | 0,001893 | 0,338712                     |      |
| TC0400003653.mm.1 | 2,08 Epb4.1    | JUC0400015604.mm.1 | 2,68  | 0,030286 | 0,512627                     |      |
| TC0400003653.mm.1 | 2,08 Epb4.1    | PSR0400029896.mm.1 | -2,03 | 0,000605 | 0,304044 Alternative 5' Donc | 0,11 |
| TC0400003653.mm.1 | 2,08 Epb4.1    | JUC0400015587.mm.1 | -2,05 | 0,049089 | 0,562174                     |      |
| TC0400003653.mm.1 | 2,08 Epb4.1    | JUC0400015599.mm.1 | -2,07 | 0,014475 | 0,449232                     |      |
| TC0400003653.mm.1 | 2,08 Epb4.1    | PSR0400029893.mm.1 | -2,17 | 0,016011 | 0,457051 Cassette Exon       | 0,11 |
| TC0400003653.mm.1 | 2,08 Epb4.1    | PSR0400029913.mm.1 | -2,18 | 0,035639 | 0,528956 Alternative 3' Acce | 0,19 |
| TC0400003653.mm.1 | 2,08 Epb4.1    | PSR0400029927.mm.1 | -2,5  | 0,011417 | 0,427643 Cassette Exon       | 0,09 |
| TC0400003653.mm.1 | 2,08 Epb4.1    | PSR0400029929.mm.1 | -2,79 | 0,002057 | 0,341838 Cassette Exon       | 0,19 |
| TC0400003653.mm.1 | 2,08 Epb4.1    | PSR0400029902.mm.1 | -2,85 | 0,015741 | 0,455416 Cassette Exon       | 0,28 |
| TC0400003653.mm.1 | 2,08 Epb4.1    | JUC0400015572.mm.1 | -2,97 | 0,004864 | 0,371692                     |      |
| TC0400003653.mm.1 | 2,08 Epb4.1    | JUC0400015573.mm.1 | -3,34 | 0,045585 | 0,554548                     |      |
| TC0400003653.mm.1 | 2,08 Epb4.1    | JUC0400015570.mm.1 | -3,39 | 0,004695 | 0,370496                     |      |
| TC0400003653.mm.1 | 2,08 Epb4.1    | JUC0400015603.mm.1 | -3,65 | 0,028278 | 0,506588                     |      |
| TC0400003653.mm.1 | 2,08 Epb4.1    | JUC0400015576.mm.1 | -4,1  | 0,001698 | 0,335395                     |      |
| TC0400003653.mm.1 | 2,08 Epb4.1    | PSR0400029899.mm.1 | -4,53 | 0,020454 | 0,478018 Cassette Exon       | 0,43 |

|                   |             |                    |       |          |                              |      |
|-------------------|-------------|--------------------|-------|----------|------------------------------|------|
| TC0400003653.mm.1 | 2,08 Epb4.1 | JUC0400015601.mm.1 | -4,56 | 0,016006 | 0,457051                     |      |
| TC0400003653.mm.1 | 2,08 Epb4.1 | JUC0400015598.mm.1 | -5,79 | 0,003745 | 0,357586                     |      |
| TC0400003653.mm.1 | 2,08 Epb4.1 | JUC0400015592.mm.1 | -8,34 | 0,011307 | 0,427133                     |      |
| TC1100001106.mm.1 | 2,16 Tusc5  | JUC1100005270.mm.1 | 7,77  | 0,042732 | 0,548097                     |      |
| TC1100001106.mm.1 | 2,16 Tusc5  | PSR1100010030.mm.1 | 2,44  | 0,029015 | 0,508842 Cassette Exon       | 0,19 |
| TC1100001106.mm.1 | 2,16 Tusc5  | JUC1100005271.mm.1 | 2,25  | 0,040193 | 0,541714                     |      |
| TC0900002640.mm.1 | 1,27 Tex9   | JUC0900012299.mm.1 | 7,77  | 0,003247 | 0,354243                     |      |
| TC0900002640.mm.1 | 1,27 Tex9   | JUC0900012296.mm.1 | 3,34  | 0,043972 | 0,550752                     |      |
| TC0900002640.mm.1 | 1,27 Tex9   | JUC0900012313.mm.1 | 2,16  | 0,020852 | 0,479521                     |      |
| TC0X00003146.mm.1 | 1,16 Lrch2  | JUC0X00009976.mm.1 | 7,76  | 0,001461 | 0,328635                     |      |
| TC0X00003146.mm.1 | 1,16 Lrch2  | PSR0X00019711.mm.1 | -2,01 | 0,029659 | 0,510834 Cassette Exon       | 0,08 |
| TC0500001821.mm.1 | 1,26 Mtus2  | JUC0500009115.mm.1 | 7,75  | 0,000558 | 0,304044                     |      |
| TC0500001821.mm.1 | 1,26 Mtus2  | JUC0500009108.mm.1 | 4,06  | 0,003203 | 0,354243                     |      |
| TC0500001821.mm.1 | 1,26 Mtus2  | JUC0500009110.mm.1 | 2,51  | 0,012618 | 0,436009                     |      |
| TC0500001821.mm.1 | 1,26 Mtus2  | PSR0500016807.mm.1 | 2,5   | 0,003299 | 0,354243 Cassette Exon       | 0,23 |
| TC0500001821.mm.1 | 1,26 Mtus2  | JUC0500009114.mm.1 | 2,49  | 0,047696 | 0,558944                     |      |
| TC0500001821.mm.1 | 1,26 Mtus2  | PSR0500016791.mm.1 | 2,11  | 0,022513 | 0,487114 Alternative 5' Donc | 0,09 |
| TC0700001996.mm.1 | 2,85 Gpr123 | JUC0700009287.mm.1 | 7,73  | 0,002085 | 0,342653                     |      |
| TC0700001996.mm.1 | 2,85 Gpr123 | PSR0700017507.mm.1 | -2,02 | 0,040984 | 0,543537 Alternative 3' Acce | 0,28 |
| TC0700001996.mm.1 | 2,85 Gpr123 | PSR0700017497.mm.1 | -2,76 | 0,017749 | 0,465424 Alternative 3' Acce | 0,26 |
| TC0700001996.mm.1 | 2,85 Gpr123 | PSR0700017502.mm.1 | -3,56 | 0,003726 | 0,357586 Cassette Exon       | 0,24 |
| TC0700001996.mm.1 | 2,85 Gpr123 | JUC0700009292.mm.1 | -3,66 | 0,047409 | 0,558302                     |      |
| TC1300002778.mm.1 | -1,02       | PSR1300015369.mm.1 | 7,72  | 0,024152 | 0,493245 Alternative 3' Acce | 0,48 |
| TC1000000812.mm.1 | 1,08 Bsg    | JUC1000003190.mm.1 | 7,72  | 0,012048 | 0,432362                     |      |
| TC1000000812.mm.1 | 1,08 Bsg    | PSR1000005872.mm.1 | 3,53  | 0,019581 | 0,474672 Cassette Exon       | 0,4  |
| TC0200002990.mm.1 | -1,3 Ptpla  | JUC0200012544.mm.1 | 7,68  | 0,002137 | 0,343459                     |      |
| TC0200002990.mm.1 | -1,3 Ptpla  | PSR0200024760.mm.1 | -2,11 | 0,031759 | 0,517489 Cassette Exon       | 0,45 |
| TC0200002990.mm.1 | -1,3 Ptpla  | JUC0200012549.mm.1 | -4,67 | 0,02091  | 0,479756                     |      |
| TC0300001805.mm.1 | 5,77 Pex5I  | JUC0300007364.mm.1 | 7,66  | 0,000003 | 0,179072                     |      |
| TC0300001805.mm.1 | 5,77 Pex5I  | JUC0300007363.mm.1 | 3,11  | 0,001439 | 0,32773                      |      |
| TC0300001805.mm.1 | 5,77 Pex5I  | PSR0300014008.mm.1 | 2,22  | 0,000027 | 0,229534 Cassette Exon       | 0,12 |
| TC0300001805.mm.1 | 5,77 Pex5I  | JUC0300007374.mm.1 | -2,17 | 0,009174 | 0,413538                     |      |
| TC0300001805.mm.1 | 5,77 Pex5I  | PSR0300014015.mm.1 | -2,42 | 0,02454  | 0,494018 Cassette Exon       | 0,13 |
| TC0300001805.mm.1 | 5,77 Pex5I  | JUC0300007366.mm.1 | -2,42 | 0,030135 | 0,512017                     |      |
| TC0300001805.mm.1 | 5,77 Pex5I  | JUC0300007385.mm.1 | -2,44 | 0,024396 | 0,493641                     |      |
| TC0300001805.mm.1 | 5,77 Pex5I  | PSR0300014019.mm.1 | -2,55 | 0,021617 | 0,483425 Alternative 5' Donc | 0,2  |
| TC0300001805.mm.1 | 5,77 Pex5I  | PSR0300013991.mm.1 | -2,72 | 0,001411 | 0,326543 Alternative 3' Acce | 0,23 |
| TC0300001805.mm.1 | 5,77 Pex5I  | PSR0300014005.mm.1 | -2,75 | 0,007918 | 0,403819 Cassette Exon       | 0,2  |
| TC0300001805.mm.1 | 5,77 Pex5I  | PSR0300013989.mm.1 | -2,96 | 0,022234 | 0,485896 Alternative 3' Acce | 0,23 |
| TC0300001805.mm.1 | 5,77 Pex5I  | PSR0300014013.mm.1 | -3,22 | 0,016087 | 0,45751 Cassette Exon        | 0,48 |
| TC0300001805.mm.1 | 5,77 Pex5I  | PSR0300014017.mm.1 | -3,93 | 0,004278 | 0,363899 Alternative 5' Donc | 0,25 |
| TC0300001805.mm.1 | 5,77 Pex5I  | JUC0300007373.mm.1 | -3,94 | 0,007948 | 0,403819                     |      |
| TC0300001805.mm.1 | 5,77 Pex5I  | PSR0300014018.mm.1 | -4,71 | 0,007882 | 0,403723 Alternative 5' Donc | 0,25 |
| TC0300001805.mm.1 | 5,77 Pex5I  | PSR0300014020.mm.1 | -4,78 | 0,009331 | 0,414973 Alternative 5' Donc | 0,2  |
| TC0300001805.mm.1 | 5,77 Pex5I  | PSR0300014027.mm.1 | -4,96 | 0,004384 | 0,366156 Cassette Exon       | 0,28 |
| TC0300001805.mm.1 | 5,77 Pex5I  | PSR0300013999.mm.1 | -5,52 | 0,002592 | 0,349501 Alternative 5' Donc | 0,36 |
| TC0300001805.mm.1 | 5,77 Pex5I  | PSR0300014016.mm.1 | -5,55 | 0,006437 | 0,390047 Alternative 5' Donc | 0,25 |
| TC0300001805.mm.1 | 5,77 Pex5I  | PSR0300014025.mm.1 | -5,79 | 0,010033 | 0,41878 Cassette Exon        | 0,34 |

|                   |            |                    |        |          |          |                     |      |
|-------------------|------------|--------------------|--------|----------|----------|---------------------|------|
| TC0300001805.mm.1 | 5,77 Pex5l | PSR0300014028.mm.1 | -5,91  | 0,0055   | 0,379939 | Cassette Exon       | 0,28 |
| TC0300001805.mm.1 | 5,77 Pex5l | PSR0300014001.mm.1 | -6,99  | 0,005506 | 0,380032 | Alternative 5' Donc | 0,36 |
| TC0300001805.mm.1 | 5,77 Pex5l | JUC0300007384.mm.1 | -8,05  | 0,000855 | 0,311909 |                     |      |
| TC0300001805.mm.1 | 5,77 Pex5l | JUC0300007383.mm.1 | -10,36 | 0,003067 | 0,353892 |                     |      |
| TC0100003080.mm.1 | 3,24 Nfasc | JUC0100014074.mm.1 | 7,64   | 0,000529 | 0,304044 |                     |      |
| TC0100003080.mm.1 | 3,24 Nfasc | JUC0100014046.mm.1 | 3,39   | 0,003459 | 0,355628 |                     |      |
| TC0100003080.mm.1 | 3,24 Nfasc | JUC0100014050.mm.1 | 3,29   | 0,001988 | 0,341091 |                     |      |
| TC0100003080.mm.1 | 3,24 Nfasc | JUC0100014075.mm.1 | 3,12   | 0,001064 | 0,316361 |                     |      |
| TC0100003080.mm.1 | 3,24 Nfasc | JUC0100014041.mm.1 | 2,01   | 0,012837 | 0,437716 |                     |      |
| TC0100003080.mm.1 | 3,24 Nfasc | PSR0100024756.mm.1 | -2,14  | 0,003437 | 0,3554   | Cassette Exon       | 0,36 |
| TC0100003080.mm.1 | 3,24 Nfasc | PSR0100024732.mm.1 | -2,24  | 0,009634 | 0,417354 | Cassette Exon       | 0,25 |
| TC0100003080.mm.1 | 3,24 Nfasc | JUC0100014047.mm.1 | -2,39  | 0,02434  | 0,49362  |                     |      |
| TC0100003080.mm.1 | 3,24 Nfasc | PSR0100024741.mm.1 | -2,42  | 0,03053  | 0,51337  | Alternative 3' Acce | 0,14 |
| TC0100003080.mm.1 | 3,24 Nfasc | PSR0100024749.mm.1 | -2,55  | 0,005269 | 0,378003 | Cassette Exon       | 0,27 |
| TC0100003080.mm.1 | 3,24 Nfasc | PSR0100024740.mm.1 | -2,93  | 0,009899 | 0,418332 | Cassette Exon       | 0,14 |
| TC0100003080.mm.1 | 3,24 Nfasc | PSR0100024765.mm.1 | -2,96  | 0,028811 | 0,508347 | Cassette Exon       | 0,09 |
| TC0100003080.mm.1 | 3,24 Nfasc | PSR0100024734.mm.1 | -3,07  | 0,008406 | 0,406611 | Cassette Exon       | 0,36 |
| TC0100003080.mm.1 | 3,24 Nfasc | JUC0100014068.mm.1 | -3,44  | 0,009528 | 0,416602 |                     |      |
| TC0100003080.mm.1 | 3,24 Nfasc | PSR0100024764.mm.1 | -3,65  | 0,01209  | 0,43255  | Cassette Exon       | 0,52 |
| TC0100003080.mm.1 | 3,24 Nfasc | PSR0100024730.mm.1 | -3,78  | 0,002703 | 0,349612 | Cassette Exon       | 0,18 |
| TC0100003080.mm.1 | 3,24 Nfasc | JUC0100014058.mm.1 | -3,82  | 0,013725 | 0,444758 |                     |      |
| TC0100003080.mm.1 | 3,24 Nfasc | JUC0100014067.mm.1 | -4,2   | 0,027951 | 0,505663 |                     |      |
| TC0100003080.mm.1 | 3,24 Nfasc | JUC0100014052.mm.1 | -4,51  | 0,027322 | 0,503766 |                     |      |
| TC0100003080.mm.1 | 3,24 Nfasc | JUC0100014070.mm.1 | -4,63  | 0,009815 | 0,417839 |                     |      |
| TC0100003080.mm.1 | 3,24 Nfasc | PSR0100024737.mm.1 | -4,8   | 0,004738 | 0,370933 | Alternative 5' Donc | 0,44 |
| TC0100003080.mm.1 | 3,24 Nfasc | JUC0100014064.mm.1 | -5,08  | 0,022101 | 0,485486 |                     |      |
| TC0100003080.mm.1 | 3,24 Nfasc | JUC0100014059.mm.1 | -5,57  | 0,005252 | 0,377753 |                     |      |
| TC0100003080.mm.1 | 3,24 Nfasc | JUC0100014063.mm.1 | -5,64  | 0,006122 | 0,387322 |                     |      |
| TC1200001023.mm.1 | 1,78 Unc79 | JUC1200004021.mm.1 | 7,64   | 0,001348 | 0,325427 |                     |      |
| TC1200001023.mm.1 | 1,78 Unc79 | JUC1200004065.mm.1 | 6,9    | 0,009909 | 0,418378 |                     |      |
| TC1200001023.mm.1 | 1,78 Unc79 | PSR1200007209.mm.1 | 6,72   | 0,003166 | 0,353901 | Cassette Exon       | 0,47 |
| TC1200001023.mm.1 | 1,78 Unc79 | PSR1200007211.mm.1 | 6,1    | 0,03286  | 0,521076 |                     |      |
| TC1200001023.mm.1 | 1,78 Unc79 | PSR1200007217.mm.1 | 4,95   | 0,004035 | 0,361636 | Cassette Exon       | 0,5  |
| TC1200001023.mm.1 | 1,78 Unc79 | PSR1200007218.mm.1 | 4,81   | 0,032495 | 0,519646 | Cassette Exon       | 0,42 |
| TC1200001023.mm.1 | 1,78 Unc79 | JUC1200004039.mm.1 | 3,93   | 0,00295  | 0,352501 |                     |      |
| TC1200001023.mm.1 | 1,78 Unc79 | PSR1200007215.mm.1 | 3,1    | 0,029829 | 0,511132 | Cassette Exon       | 0,28 |
| TC1200001023.mm.1 | 1,78 Unc79 | PSR1200007207.mm.1 | 2,98   | 0,022531 | 0,487133 | Cassette Exon       | 0,13 |
| TC1200001023.mm.1 | 1,78 Unc79 | JUC1200004020.mm.1 | 2,93   | 0,005812 | 0,383104 |                     |      |
| TC1200001023.mm.1 | 1,78 Unc79 | JUC1200004064.mm.1 | 2,35   | 0,003312 | 0,354243 |                     |      |
| TC1200001023.mm.1 | 1,78 Unc79 | PSR1200007227.mm.1 | -2,06  | 0,031384 | 0,516345 | Cassette Exon       | 0,14 |
| TC1200001023.mm.1 | 1,78 Unc79 | JUC1200004027.mm.1 | -2,07  | 0,033013 | 0,521478 |                     |      |
| TC1200001023.mm.1 | 1,78 Unc79 | JUC1200004058.mm.1 | -2,12  | 0,002703 | 0,349612 |                     |      |
| TC1200001023.mm.1 | 1,78 Unc79 | PSR1200007243.mm.1 | -2,13  | 0,011745 | 0,430016 | Cassette Exon       | 0,16 |
| TC1200001023.mm.1 | 1,78 Unc79 | JUC1200004042.mm.1 | -2,15  | 0,031427 | 0,516564 |                     |      |
| TC1200001023.mm.1 | 1,78 Unc79 | PSR1200007261.mm.1 | -2,18  | 0,009417 | 0,415914 | Cassette Exon       | 0,1  |
| TC1200001023.mm.1 | 1,78 Unc79 | JUC1200004018.mm.1 | -2,2   | 0,022224 | 0,485896 |                     |      |
| TC1200001023.mm.1 | 1,78 Unc79 | JUC1200004073.mm.1 | -2,21  | 0,033359 | 0,522553 |                     |      |
| TC1200001023.mm.1 | 1,78 Unc79 | PSR1200007276.mm.1 | -2,23  | 0,007744 | 0,402774 | Cassette Exon       | 0,09 |



|                   |       |                      |                    |       |          |          |                     |      |
|-------------------|-------|----------------------|--------------------|-------|----------|----------|---------------------|------|
| TC1200001023.mm.1 | 1,78  | Unc79                | PSR1200007260.mm.1 | -2,56 | 0,040199 | 0,541714 | Cassette Exon       | 0,13 |
| TC1200001023.mm.1 | 1,78  | Unc79                | PSR1200007278.mm.1 | -2,59 | 0,035638 | 0,528956 | Alternative 5' Donc | 0,1  |
| TC1200001023.mm.1 | 1,78  | Unc79                | PSR1200007258.mm.1 | -2,65 | 0,003258 | 0,354243 | Cassette Exon       | 0,15 |
| TC1200001023.mm.1 | 1,78  | Unc79                | JUC1200004030.mm.1 | -2,65 | 0,000823 | 0,311886 |                     |      |
| TC1200001023.mm.1 | 1,78  | Unc79                | PSR1200007210.mm.1 | -2,68 | 0,011478 | 0,428022 | Alternative 3' Acce | 0,32 |
| TC1200001023.mm.1 | 1,78  | Unc79                | JUC1200004048.mm.1 | -2,68 | 0,029863 | 0,511132 |                     |      |
| TC1200001023.mm.1 | 1,78  | Unc79                | PSR1200007223.mm.1 | -2,78 | 0,045939 | 0,555316 | Cassette Exon       | 0,17 |
| TC1200001023.mm.1 | 1,78  | Unc79                | JUC1200004074.mm.1 | -2,78 | 0,015109 | 0,452466 |                     |      |
| TC1200001023.mm.1 | 1,78  | Unc79                | PSR1200007257.mm.1 | -2,79 | 0,001009 | 0,316361 | Cassette Exon       | 0,24 |
| TC1200001023.mm.1 | 1,78  | Unc79                | JUC1200004035.mm.1 | -2,92 | 0,006471 | 0,390467 |                     |      |
| TC1200001023.mm.1 | 1,78  | Unc79                | PSR1200007281.mm.1 | -3,13 | 0,012933 | 0,438537 | Alternative 5' Donc | 0,1  |
| TC1200001023.mm.1 | 1,78  | Unc79                | JUC1200004025.mm.1 | -3,16 | 0,00135  | 0,325427 |                     |      |
| TC1200001023.mm.1 | 1,78  | Unc79                | PSR1200007224.mm.1 | -3,25 | 0,005298 | 0,378059 | Alternative 3' Acce | 0,26 |
| TC1100001816.mm.1 | -1,14 | Cep112               | JUC1100008914.mm.1 | 7,62  | 0,014785 | 0,45081  |                     |      |
| TC1100001816.mm.1 | -1,14 | Cep112               | JUC1100008908.mm.1 | 4,09  | 0,001081 | 0,317191 |                     |      |
| TC1100001816.mm.1 | -1,14 | Cep112               | PSR1100017106.mm.1 | 3,83  | 0,007183 | 0,397855 | Cassette Exon       | 0,39 |
| TC1100001816.mm.1 | -1,14 | Cep112               | JUC1100008909.mm.1 | 3,65  | 0,011645 | 0,42985  |                     |      |
| TC1100001816.mm.1 | -1,14 | Cep112               | PSR1100017120.mm.1 | 3,18  | 0,002552 | 0,349501 | Cassette Exon       | 0,36 |
| TC1100001816.mm.1 | -1,14 | Cep112               | PSR1100017105.mm.1 | 3,09  | 0,008266 | 0,405976 | Cassette Exon       | 0,39 |
| TC1100001816.mm.1 | -1,14 | Cep112               | JUC1100008906.mm.1 | 3     | 0,011913 | 0,431645 |                     |      |
| TC1100001816.mm.1 | -1,14 | Cep112               | PSR1100017122.mm.1 | 2,69  | 0,024121 | 0,493222 | Cassette Exon       | 0,29 |
| TC1100001816.mm.1 | -1,14 | Cep112               | PSR1100017104.mm.1 | 2,69  | 0,010402 | 0,421477 | Cassette Exon       | 0,25 |
| TC1100001816.mm.1 | -1,14 | Cep112               | JUC1100008903.mm.1 | 2,68  | 0,023229 | 0,490032 |                     |      |
| TC1100001816.mm.1 | -1,14 | Cep112               | PSR1100017096.mm.1 | 2,52  | 0,000181 | 0,283791 | Cassette Exon       | 0,13 |
| TC1100001816.mm.1 | -1,14 | Cep112               | PSR1100017116.mm.1 | 2,46  | 0,002821 | 0,352207 | Cassette Exon       | 0,18 |
| TC1100001816.mm.1 | -1,14 | Cep112               | PSR1100017126.mm.1 | 2,44  | 0,00797  | 0,403853 | Cassette Exon       | 0,13 |
| TC1100001816.mm.1 | -1,14 | Cep112               | PSR1100017112.mm.1 | 2,43  | 0,000447 | 0,297771 | Cassette Exon       | 0,28 |
| TC1100001816.mm.1 | -1,14 | Cep112               | PSR1100017125.mm.1 | 2,41  | 0,004759 | 0,371039 | Cassette Exon       | 0,13 |
| TC1100001816.mm.1 | -1,14 | Cep112               | PSR1100017099.mm.1 | 2,38  | 0,022064 | 0,485335 | Cassette Exon       | 0,17 |
| TC1100001816.mm.1 | -1,14 | Cep112               | PSR1100017108.mm.1 | 2,37  | 0,009545 | 0,416659 | Cassette Exon       | 0,23 |
| TC1100001816.mm.1 | -1,14 | Cep112               | PSR1100017111.mm.1 | 2,34  | 0,004753 | 0,371039 | Cassette Exon       | 0,38 |
| TC1100001816.mm.1 | -1,14 | Cep112               | PSR1100017100.mm.1 | 2,32  | 0,035023 | 0,527495 | Cassette Exon       | 0,23 |
| TC1100001816.mm.1 | -1,14 | Cep112               | PSR1100017113.mm.1 | 2,29  | 0,003737 | 0,357586 | Cassette Exon       | 0,17 |
| TC1100001816.mm.1 | -1,14 | Cep112               | PSR1100017110.mm.1 | 2,19  | 0,01072  | 0,423727 | Cassette Exon       | 0,26 |
| TC1100001816.mm.1 | -1,14 | Cep112               | PSR1100017098.mm.1 | 2,19  | 0,020043 | 0,476453 | Cassette Exon       | 0,17 |
| TC1100001816.mm.1 | -1,14 | Cep112               | JUC1100008922.mm.1 | 2,06  | 0,007342 | 0,399179 |                     |      |
| TC1100001816.mm.1 | -1,14 | Cep112               | PSR1100017101.mm.1 | 2,01  | 0,011662 | 0,429939 | Cassette Exon       | 0,18 |
| TC1400000795.mm.1 | -1,11 | Nfatc4               | JUC1400003431.mm.1 | 7,59  | 0,011092 | 0,425947 |                     |      |
| TC0700001446.mm.1 | 1,13  | Trpc2; Xndc1; Xntrpc | JUC0700006482.mm.1 | 7,57  | 0,022194 | 0,485778 |                     |      |
| TC0800002741.mm.1 | 3,13  | Cngb1                | JUC0800011484.mm.1 | 7,54  | 0,004351 | 0,365487 |                     |      |
| TC0800002741.mm.1 | 3,13  | Cngb1                | JUC0800011465.mm.1 | 7,53  | 0,002757 | 0,350151 |                     |      |
| TC0800002741.mm.1 | 3,13  | Cngb1                | PSR0800021040.mm.1 | 6,89  | 0,00005  | 0,24627  | Cassette Exon       | 0,35 |
| TC0800002741.mm.1 | 3,13  | Cngb1                | JUC0800011456.mm.1 | 6,82  | 0,00056  | 0,304044 |                     |      |
| TC0800002741.mm.1 | 3,13  | Cngb1                | PSR0800021072.mm.1 | 6,32  | 0,000211 | 0,28803  | Alternative 5' Donc | 0,44 |
| TC0800002741.mm.1 | 3,13  | Cngb1                | JUC0800011463.mm.1 | 5,27  | 0,003774 | 0,357586 |                     |      |
| TC0800002741.mm.1 | 3,13  | Cngb1                | PSR0800021039.mm.1 | 5,06  | 0,000461 | 0,298999 | Cassette Exon       | 0,4  |
| TC0800002741.mm.1 | 3,13  | Cngb1                | PSR0800021033.mm.1 | 4,75  | 0,011906 | 0,431549 | Alternative 3' Acce | 0,48 |
| TC0800002741.mm.1 | 3,13  | Cngb1                | JUC0800011466.mm.1 | 4,13  | 0,012011 | 0,432286 |                     |      |

|                   |            |                    |       |          |          |                     |      |
|-------------------|------------|--------------------|-------|----------|----------|---------------------|------|
| TC0800002741.mm.1 | 3,13 Cngb1 | JUC0800011464.mm.1 | 3,98  | 0,007169 | 0,397855 |                     |      |
| TC0800002741.mm.1 | 3,13 Cngb1 | JUC0800011462.mm.1 | 3,83  | 0,020918 | 0,479811 |                     |      |
| TC0800002741.mm.1 | 3,13 Cngb1 | JUC0800011478.mm.1 | 3,78  | 0,003658 | 0,357266 |                     |      |
| TC0800002741.mm.1 | 3,13 Cngb1 | JUC0800011458.mm.1 | 3,57  | 0,000177 | 0,283396 |                     |      |
| TC0800002741.mm.1 | 3,13 Cngb1 | JUC0800011481.mm.1 | 3,53  | 0,002239 | 0,34578  |                     |      |
| TC0800002741.mm.1 | 3,13 Cngb1 | PSR0800021043.mm.1 | 2,86  | 0,024012 | 0,492783 | Cassette Exon       | 0,43 |
| TC0800002741.mm.1 | 3,13 Cngb1 | JUC0800011479.mm.1 | 2,82  | 0,001374 | 0,32572  |                     |      |
| TC0800002741.mm.1 | 3,13 Cngb1 | JUC0800011460.mm.1 | 2,54  | 0,015783 | 0,455613 |                     |      |
| TC0800002741.mm.1 | 3,13 Cngb1 | JUC0800011467.mm.1 | 2,51  | 0,011719 | 0,429969 |                     |      |
| TC0800002741.mm.1 | 3,13 Cngb1 | PSR0800021038.mm.1 | 2,46  | 0,00363  | 0,3566   | Cassette Exon       | 0,3  |
| TC0800002741.mm.1 | 3,13 Cngb1 | JUC0800011461.mm.1 | 2,46  | 0,011823 | 0,430456 |                     |      |
| TC0800002741.mm.1 | 3,13 Cngb1 | PSR0800021046.mm.1 | 2,45  | 0,010288 | 0,420369 | Cassette Exon       | 0,4  |
| TC0800002741.mm.1 | 3,13 Cngb1 | PSR0800021047.mm.1 | 2,39  | 0,000925 | 0,313363 | Cassette Exon       | 0,33 |
| TC0800002741.mm.1 | 3,13 Cngb1 | PSR0800021068.mm.1 | 2,37  | 0,000113 | 0,267977 | Cassette Exon       | 0,33 |
| TC0800002741.mm.1 | 3,13 Cngb1 | JUC0800011474.mm.1 | 2,18  | 0,020063 | 0,476514 |                     |      |
| TC0800002741.mm.1 | 3,13 Cngb1 | JUC0800011457.mm.1 | 2,15  | 0,00405  | 0,361816 |                     |      |
| TC0800002741.mm.1 | 3,13 Cngb1 | PSR0800021056.mm.1 | -2,68 | 0,037023 | 0,532502 | Cassette Exon       | 0,31 |
| TC0800002741.mm.1 | 3,13 Cngb1 | JUC0800011492.mm.1 | -2,69 | 0,020172 | 0,477086 |                     |      |
| TC0800002741.mm.1 | 3,13 Cngb1 | PSR0800021036.mm.1 | -2,73 | 0,006644 | 0,392838 |                     |      |
| TC0800002741.mm.1 | 3,13 Cngb1 | JUC0800011469.mm.1 | -2,81 | 0,016382 | 0,458696 |                     |      |
| TC0800002741.mm.1 | 3,13 Cngb1 | PSR0800021063.mm.1 | -2,86 | 0,031399 | 0,516434 | Alternative 5' Donc | 0,18 |
| TC0800002741.mm.1 | 3,13 Cngb1 | PSR0800021064.mm.1 | -3,11 | 0,006454 | 0,390284 | Cassette Exon       | 0,24 |
| TC0800002741.mm.1 | 3,13 Cngb1 | PSR0800021052.mm.1 | -3,13 | 0,00953  | 0,416602 | Cassette Exon       | 0,34 |
| TC0800002741.mm.1 | 3,13 Cngb1 | PSR0800021053.mm.1 | -3,55 | 0,035326 | 0,528383 | Cassette Exon       | 0,37 |
| TC0800002741.mm.1 | 3,13 Cngb1 | JUC0800011493.mm.1 | -3,81 | 0,005909 | 0,384002 |                     |      |
| TC0800002741.mm.1 | 3,13 Cngb1 | PSR0800021055.mm.1 | -3,9  | 0,004907 | 0,372662 | Alternative 3' Acce | 0,33 |
| TC0800002741.mm.1 | 3,13 Cngb1 | JUC0800011480.mm.1 | -5,31 | 0,001246 | 0,322251 |                     |      |
| TC0800002741.mm.1 | 3,13 Cngb1 | JUC0800011486.mm.1 | -5,34 | 0,001463 | 0,328846 |                     |      |
| TC0800002741.mm.1 | 3,13 Cngb1 | JUC0800011490.mm.1 | -5,6  | 0,018383 | 0,468484 |                     |      |
| TC0800002741.mm.1 | 3,13 Cngb1 | JUC0800011488.mm.1 | -6,74 | 0,003746 | 0,357586 |                     |      |
| TC0700000296.mm.1 | 1,16 Rtn2  | JUC0700001099.mm.1 | 7,54  | 0,003686 | 0,357266 |                     |      |
| TC0700000296.mm.1 | 1,16 Rtn2  | JUC0700001097.mm.1 | 3,71  | 0,017352 | 0,46355  |                     |      |
| TC0700000296.mm.1 | 1,16 Rtn2  | PSR0700002262.mm.1 | 3,48  | 0,002792 | 0,351449 | Cassette Exon       | 0,39 |
| TC0700000296.mm.1 | 1,16 Rtn2  | JUC0700001106.mm.1 | -2,11 | 0,02564  | 0,498009 |                     |      |
| TC1200001583.mm.1 | 1,82 Sntg2 | JUC1200006061.mm.1 | 7,52  | 0,000013 | 0,185427 |                     |      |
| TC1200001583.mm.1 | 1,82 Sntg2 | JUC1200006046.mm.1 | 5,42  | 0,002477 | 0,349135 |                     |      |
| TC1200001583.mm.1 | 1,82 Sntg2 | PSR1200010978.mm.1 | 3,85  | 0,000735 | 0,307808 | Cassette Exon       | 0,37 |
| TC1200001583.mm.1 | 1,82 Sntg2 | PSR1200010979.mm.1 | 3,14  | 0,008257 | 0,405976 | Cassette Exon       | 0,34 |
| TC1200001583.mm.1 | 1,82 Sntg2 | PSR1200010977.mm.1 | 2,92  | 0,009159 | 0,413447 | Cassette Exon       | 0,21 |
| TC1200001583.mm.1 | 1,82 Sntg2 | JUC1200006058.mm.1 | 2,87  | 0,002667 | 0,349612 |                     |      |
| TC1200001583.mm.1 | 1,82 Sntg2 | JUC1200006055.mm.1 | 2,81  | 0,001895 | 0,338712 |                     |      |
| TC1200001583.mm.1 | 1,82 Sntg2 | PSR1200010985.mm.1 | 2,77  | 0,009069 | 0,412827 | Cassette Exon       | 0,07 |
| TC1200001583.mm.1 | 1,82 Sntg2 | JUC1200006060.mm.1 | 2,53  | 0,0044   | 0,3664   |                     |      |
| TC1200001583.mm.1 | 1,82 Sntg2 | JUC1200006056.mm.1 | 2,27  | 0,003937 | 0,359818 |                     |      |
| TC1200001583.mm.1 | 1,82 Sntg2 | JUC1200006051.mm.1 | -2,43 | 0,044911 | 0,55271  |                     |      |
| TC1200001583.mm.1 | 1,82 Sntg2 | PSR1200010972.mm.1 | -2,64 | 0,007822 | 0,403089 | Cassette Exon       | 0,13 |
| TC1200001583.mm.1 | 1,82 Sntg2 | JUC1200006065.mm.1 | -2,98 | 0,000273 | 0,28803  |                     |      |
| TC1200001583.mm.1 | 1,82 Sntg2 | PSR1200010991.mm.1 | -3,01 | 0,005785 | 0,383104 | Alternative 5' Donc | 0,19 |

|                   |                  |                    |       |          |                              |      |
|-------------------|------------------|--------------------|-------|----------|------------------------------|------|
| TC0600001289.mm.1 | 1,46 Rho         | JUC0600005319.mm.1 | 7,5   | 0,001243 | 0,322251                     |      |
| TC0600001289.mm.1 | 1,46 Rho         | PSR0600010228.mm.1 | 7,04  | 0,002091 | 0,342919 Cassette Exon       | 0,34 |
| TC0600001289.mm.1 | 1,46 Rho         | PSR0600010227.mm.1 | 2,36  | 0,006333 | 0,389463 Cassette Exon       | 0,34 |
| TC0400002222.mm.1 | 1,15 Fam92a      | JUC0400009727.mm.1 | 7,47  | 0,033434 | 0,522793                     |      |
| TC0400002222.mm.1 | 1,15 Fam92a      | JUC0400009728.mm.1 | 3,93  | 0,026625 | 0,50179                      |      |
| TC0400002222.mm.1 | 1,15 Fam92a      | JUC0400009723.mm.1 | -2,68 | 0,030253 | 0,512521                     |      |
| TC1100003081.mm.1 | -1,46            | JUC1100014867.mm.1 | 7,43  | 0,047616 | 0,558743                     |      |
| TC0300002272.mm.1 | 1,21             | JUC0300008957.mm.1 | 7,43  | 0,006756 | 0,393343                     |      |
| TC0600000135.mm.1 | -1,12 St7        | JUC0600000484.mm.1 | 7,41  | 0,003229 | 0,354243                     |      |
| TC0600000135.mm.1 | -1,12 St7        | JUC0600000466.mm.1 | -2,03 | 0,024787 | 0,495079                     |      |
| TC1500001711.mm.1 | -1,13 Mroh4      | JUC1500007354.mm.1 | 7,38  | 0,026603 | 0,501778                     |      |
| TC1700000987.mm.1 | 1,73 St6gal2     | JUC1700004993.mm.1 | 7,35  | 0,008636 | 0,408463                     |      |
| TC1700000987.mm.1 | 1,73 St6gal2     | JUC1700004990.mm.1 | 5,54  | 0,001195 | 0,321568                     |      |
| TC1700000987.mm.1 | 1,73 St6gal2     | PSR1700009399.mm.1 | 4,54  | 0,010071 | 0,418974 Cassette Exon       | 0,45 |
| TC1700000987.mm.1 | 1,73 St6gal2     | PSR1700009398.mm.1 | 3,59  | 0,010483 | 0,421891 Cassette Exon       | 0,34 |
| TC1700000987.mm.1 | 1,73 St6gal2     | PSR1700009402.mm.1 | 2,79  | 0,009728 | 0,417839 Cassette Exon       | 0,3  |
| TC1700000987.mm.1 | 1,73 St6gal2     | PSR1700009397.mm.1 | 2,49  | 0,018768 | 0,470771 Cassette Exon       | 0,33 |
| TC1700000987.mm.1 | 1,73 St6gal2     | JUC1700004991.mm.1 | 2,31  | 0,021757 | 0,484278                     |      |
| TC1700000987.mm.1 | 1,73 St6gal2     | PSR1700009390.mm.1 | -2,34 | 0,043739 | 0,550304 Alternative 3' Acce | 0,15 |
| TC1100002122.mm.1 | 2,06 Nefh        | JUC1100010791.mm.1 | 7,34  | 0,024227 | 0,493294                     |      |
| TC1100002122.mm.1 | 2,06 Nefh        | PSR1100020644.mm.1 | -2,09 | 0,040231 | 0,541714 Alternative 5' Donc | 0,15 |
| TC0200000382.mm.1 | -1,67 Il1rn      | JUC0200000876.mm.1 | 7,34  | 0,004166 | 0,3623                       |      |
| TC0700000388.mm.1 | 1,08 Ethe1       | JUC0700001396.mm.1 | 7,34  | 0,003518 | 0,355749                     |      |
| TC0700000388.mm.1 | 1,08 Ethe1       | JUC0700001399.mm.1 | -2,06 | 0,009804 | 0,417839                     |      |
| TC0700000388.mm.1 | 1,08 Ethe1       | JUC0700001400.mm.1 | -2,24 | 0,000734 | 0,307808                     |      |
| TC0200000438.mm.1 | 1,32 Kcnt1       | JUC0200001278.mm.1 | 7,33  | 0,001827 | 0,337273                     |      |
| TC0200000438.mm.1 | 1,32 Kcnt1       | JUC0200001301.mm.1 | 4,03  | 0,008766 | 0,409781                     |      |
| TC0200000438.mm.1 | 1,32 Kcnt1       | PSR0200002715.mm.1 | 3,2   | 0,000008 | 0,25272 Cassette Exon        | 0,38 |
| TC0200000438.mm.1 | 1,32 Kcnt1       | PSR0200002754.mm.1 | 3,09  | 0,002607 | 0,349501 Cassette Exon       | 0,37 |
| TC0200000438.mm.1 | 1,32 Kcnt1       | PSR0200002742.mm.1 | 2,24  | 0,0099   | 0,418332 Cassette Exon       | 0,05 |
| TC0200000438.mm.1 | 1,32 Kcnt1       | PSR0200002716.mm.1 | 2,06  | 0,010853 | 0,424161 Cassette Exon       | 0,23 |
| TC0200000438.mm.1 | 1,32 Kcnt1       | JUC0200001277.mm.1 | 2,03  | 0,023328 | 0,490065                     |      |
| TC0200000438.mm.1 | 1,32 Kcnt1       | JUC0200001282.mm.1 | 2,01  | 0,017568 | 0,464258                     |      |
| TC0200000438.mm.1 | 1,32 Kcnt1       | JUC0200001310.mm.1 | -2,09 | 0,008401 | 0,406611                     |      |
| TC0200000438.mm.1 | 1,32 Kcnt1       | JUC0200001294.mm.1 | -2,46 | 0,005268 | 0,378003                     |      |
| TC0200000438.mm.1 | 1,32 Kcnt1       | PSR0200002751.mm.1 | -3,16 | 0,03158  | 0,517177 Alternative 3' Acce | 0,3  |
| TC0200000438.mm.1 | 1,32 Kcnt1       | PSR0200002708.mm.1 | -3,22 | 0,002965 | 0,352501 Cassette Exon       | 0,22 |
| TC1100001125.mm.1 | 1,21 Git1        | JUC1100005361.mm.1 | 7,32  | 0,000556 | 0,304044                     |      |
| TC1100001125.mm.1 | 1,21 Git1        | JUC1100005360.mm.1 | 3,7   | 0,025662 | 0,498118                     |      |
| TC1100001125.mm.1 | 1,21 Git1        | PSR1100010209.mm.1 | 2,53  | 0,026686 | 0,502057 Cassette Exon       | 0,46 |
| TC1800000019.mm.1 | -1,41 Svil       | JUC1800000115.mm.1 | 7,29  | 0,04463  | 0,552129                     |      |
| TC0200003828.mm.1 | 3 Cerkl; Neurod1 | PSR0200033163.mm.1 | 7,28  | 0,004232 | 0,363295 Alternative 5' Donc | 0,32 |
| TC0200003828.mm.1 | 3 Cerkl; Neurod1 | PSR0200033160.mm.1 | 6,26  | 0,004938 | 0,373093 Cassette Exon       | 0,56 |
| TC0200003828.mm.1 | 3 Cerkl; Neurod1 | JUC0200017104.mm.1 | 5,69  | 0,003049 | 0,353892                     |      |
| TC0200003828.mm.1 | 3 Cerkl; Neurod1 | PSR0200033158.mm.1 | 5,28  | 0,029338 | 0,509981 Cassette Exon       | 0,56 |
| TC0200003828.mm.1 | 3 Cerkl; Neurod1 | PSR0200033159.mm.1 | 4,89  | 0,007272 | 0,398297 Cassette Exon       | 0,56 |
| TC0200003828.mm.1 | 3 Cerkl; Neurod1 | PSR0200033156.mm.1 | 4,44  | 0,026888 | 0,502518 Cassette Exon       | 0,56 |
| TC0200003828.mm.1 | 3 Cerkl; Neurod1 | JUC0200017068.mm.1 | 2,16  | 0,009022 | 0,41262                      |      |

|                   |                  |                    |       |          |                              |      |
|-------------------|------------------|--------------------|-------|----------|------------------------------|------|
| TC0200003828.mm.1 | 3 Cerkl; Neurod1 | PSR0200033134.mm.1 | 2,06  | 0,001053 | 0,316361 Alternative 3' Acce | 0,15 |
| TC0200003828.mm.1 | 3 Cerkl; Neurod1 | PSR0200033108.mm.1 | -2,31 | 0,007844 | 0,403342 Cassette Exon       | 0,12 |
| TC0200003828.mm.1 | 3 Cerkl; Neurod1 | PSR0200033137.mm.1 | -2,41 | 0,043571 | 0,550033 Cassette Exon       | 0,19 |
| TC0200003828.mm.1 | 3 Cerkl; Neurod1 | PSR0200033165.mm.1 | -2,73 | 0,010134 | 0,419217 Alternative 5' Donc | 0,31 |
| TC0200003828.mm.1 | 3 Cerkl; Neurod1 | JUC0200017099.mm.1 | -2,77 | 0,033035 | 0,521501                     |      |
| TC0200003828.mm.1 | 3 Cerkl; Neurod1 | JUC0200017075.mm.1 | -2,88 | 0,023047 | 0,489311                     |      |
| TC0200003828.mm.1 | 3 Cerkl; Neurod1 | PSR0200033148.mm.1 | -3,1  | 0,043629 | 0,550161 Cassette Exon       | 0,03 |
| TC0200003828.mm.1 | 3 Cerkl; Neurod1 | PSR0200033166.mm.1 | -3,19 | 0,018299 | 0,468049 Alternative 5' Donc | 0,31 |
| TC0200003828.mm.1 | 3 Cerkl; Neurod1 | PSR0200033154.mm.1 | -3,29 | 0,00072  | 0,306015 Cassette Exon       | 0,26 |
| TC0200003828.mm.1 | 3 Cerkl; Neurod1 | JUC0200017094.mm.1 | -3,36 | 0,02271  | 0,487767                     |      |
| TC0200003828.mm.1 | 3 Cerkl; Neurod1 | PSR0200033143.mm.1 | -3,5  | 0,003235 | 0,354243 Cassette Exon       | 0,25 |
| TC0200003828.mm.1 | 3 Cerkl; Neurod1 | JUC0200017090.mm.1 | -3,82 | 0,005559 | 0,380773                     |      |
| TC0200003828.mm.1 | 3 Cerkl; Neurod1 | JUC0200017105.mm.1 | -3,91 | 0,000964 | 0,313363                     |      |
| TC0200003828.mm.1 | 3 Cerkl; Neurod1 | JUC0200017071.mm.1 | -3,96 | 0,018123 | 0,467224                     |      |
| TC0200003828.mm.1 | 3 Cerkl; Neurod1 | JUC0200017101.mm.1 | -4,7  | 0,005083 | 0,37538                      |      |
| TC0200003828.mm.1 | 3 Cerkl; Neurod1 | JUC0200017093.mm.1 | -4,78 | 0,016538 | 0,459612                     |      |
| TC0200003828.mm.1 | 3 Cerkl; Neurod1 | JUC0200017092.mm.1 | -4,87 | 0,006089 | 0,38673                      |      |
| TC0200003828.mm.1 | 3 Cerkl; Neurod1 | JUC0200017100.mm.1 | -4,89 | 0,000864 | 0,311909                     |      |
| TC0200003828.mm.1 | 3 Cerkl; Neurod1 | JUC0200017091.mm.1 | -5,01 | 0,021616 | 0,483425                     |      |
| TC0200003828.mm.1 | 3 Cerkl; Neurod1 | JUC0200017098.mm.1 | -7,75 | 0,023318 | 0,490065                     |      |
| TC0200000801.mm.1 | 3,42 Kif5c       | JUC0200003361.mm.1 | 7,28  | 0,003218 | 0,354243                     |      |
| TC0200000801.mm.1 | 3,42 Kif5c       | PSR0200006637.mm.1 | 3,58  | 0,024142 | 0,493245 Cassette Exon       | 0,27 |
| TC0200000801.mm.1 | 3,42 Kif5c       | JUC0200003350.mm.1 | 2,58  | 0,046712 | 0,556856                     |      |
| TC0200000801.mm.1 | 3,42 Kif5c       | PSR0200006630.mm.1 | 2,25  | 0,021981 | 0,485125 Cassette Exon       | 0,15 |
| TC0200000801.mm.1 | 3,42 Kif5c       | JUC0200003360.mm.1 | -2,09 | 0,0102   | 0,419711                     |      |
| TC0200000801.mm.1 | 3,42 Kif5c       | JUC0200003343.mm.1 | -2,11 | 0,000374 | 0,291789                     |      |
| TC0200000801.mm.1 | 3,42 Kif5c       | PSR0200006658.mm.1 | -2,21 | 0,022674 | 0,487625 Cassette Exon       | 0,29 |
| TC0200000801.mm.1 | 3,42 Kif5c       | PSR0200006649.mm.1 | -2,36 | 0,006861 | 0,394108 Alternative 5' Donc | 0,22 |
| TC0200000801.mm.1 | 3,42 Kif5c       | JUC0200003366.mm.1 | -2,48 | 0,024155 | 0,493245                     |      |
| TC0200000801.mm.1 | 3,42 Kif5c       | JUC0200003370.mm.1 | -2,57 | 0,030744 | 0,514065                     |      |
| TC0200000801.mm.1 | 3,42 Kif5c       | JUC0200003355.mm.1 | -2,57 | 0,017242 | 0,462729                     |      |
| TC0200000801.mm.1 | 3,42 Kif5c       | PSR0200006644.mm.1 | -2,61 | 0,002529 | 0,349501 Alternative 5' Donc | 0,22 |
| TC0200000801.mm.1 | 3,42 Kif5c       | PSR0200006651.mm.1 | -2,62 | 0,018584 | 0,469618 Cassette Exon       | 0,21 |
| TC0200000801.mm.1 | 3,42 Kif5c       | PSR0200006650.mm.1 | -2,88 | 0,002024 | 0,341377 Cassette Exon       | 0,19 |
| TC0200000801.mm.1 | 3,42 Kif5c       | PSR0200006655.mm.1 | -2,93 | 0,005069 | 0,375225 Cassette Exon       | 0,31 |
| TC0200000801.mm.1 | 3,42 Kif5c       | JUC0200003365.mm.1 | -3,01 | 0,015467 | 0,454312                     |      |
| TC0200000801.mm.1 | 3,42 Kif5c       | PSR0200006625.mm.1 | -3,07 | 0,000573 | 0,304044 Cassette Exon       | 0,24 |
| TC0200000801.mm.1 | 3,42 Kif5c       | JUC0200003368.mm.1 | -3,2  | 0,045206 | 0,553564                     |      |
| TC0200000801.mm.1 | 3,42 Kif5c       | PSR0200006657.mm.1 | -3,48 | 0,00287  | 0,352207 Cassette Exon       | 0,29 |
| TC0200000801.mm.1 | 3,42 Kif5c       | PSR0200006645.mm.1 | -3,69 | 0,000312 | 0,288663 Alternative 3' Acce | 0,43 |
| TC0200000801.mm.1 | 3,42 Kif5c       | PSR0200006626.mm.1 | -3,84 | 0,00615  | 0,387873 Alternative 3' Acce | 0,4  |
| TC0200000801.mm.1 | 3,42 Kif5c       | PSR0200006654.mm.1 | -4,07 | 0,008994 | 0,41201 Cassette Exon        | 0,41 |
| TC0200000801.mm.1 | 3,42 Kif5c       | PSR0200006628.mm.1 | -4,1  | 0,000852 | 0,311909 Alternative 5' Donc | 0,47 |
| TC0200000801.mm.1 | 3,42 Kif5c       | JUC0200003371.mm.1 | -5,43 | 0,002266 | 0,34578                      |      |
| TC0200000801.mm.1 | 3,42 Kif5c       | JUC0200003369.mm.1 | -9,2  | 0,003264 | 0,354243                     |      |
| TC1500001675.mm.1 | 2,89 Fam135b     | JUC1500007092.mm.1 | 7,28  | 0,001245 | 0,322251                     |      |
| TC1500001675.mm.1 | 2,89 Fam135b     | PSR1500012580.mm.1 | 2,54  | 0,00293  | 0,352289 Cassette Exon       | 0,04 |
| TC1500001675.mm.1 | 2,89 Fam135b     | JUC1500007091.mm.1 | 2,1   | 0,005582 | 0,381035                     |      |

|                   |              |                    |       |          |          |                          |
|-------------------|--------------|--------------------|-------|----------|----------|--------------------------|
| TC1500001675.mm.1 | 2,89 Fam135b | PSR1500012569.mm.1 | 2,02  | 0,040459 | 0,542132 |                          |
| TC1500001675.mm.1 | 2,89 Fam135b | PSR1500012575.mm.1 | -2,18 | 0,00161  | 0,332831 | Cassette Exon 0,12       |
| TC1500001675.mm.1 | 2,89 Fam135b | PSR1500012585.mm.1 | -2,2  | 0,011322 | 0,427133 | Cassette Exon 0,15       |
| TC1500001675.mm.1 | 2,89 Fam135b | JUC1500007102.mm.1 | -2,45 | 0,033766 | 0,523689 |                          |
| TC1500001675.mm.1 | 2,89 Fam135b | PSR1500012568.mm.1 | -2,52 | 0,004741 | 0,370933 | Cassette Exon 0,28       |
| TC1500001675.mm.1 | 2,89 Fam135b | JUC1500007093.mm.1 | -2,56 | 0,034965 | 0,52724  |                          |
| TC1500001675.mm.1 | 2,89 Fam135b | PSR1500012588.mm.1 | -2,66 | 0,005034 | 0,374447 |                          |
| TC1500001675.mm.1 | 2,89 Fam135b | JUC1500007099.mm.1 | -3,18 | 0,032347 | 0,519174 |                          |
| TC1500001675.mm.1 | 2,89 Fam135b | JUC1500007090.mm.1 | -3,65 | 0,015326 | 0,453725 |                          |
| TC1500001675.mm.1 | 2,89 Fam135b | JUC1500007088.mm.1 | -6,23 | 0,003095 | 0,353892 |                          |
| TC1000000661.mm.1 | 1,44 Ank3    | JUC1000002510.mm.1 | 7,27  | 0,001709 | 0,335996 |                          |
| TC1000000661.mm.1 | 1,44 Ank3    | JUC1000002509.mm.1 | 3,3   | 0,027874 | 0,505612 |                          |
| TC1000000661.mm.1 | 1,44 Ank3    | JUC1000002534.mm.1 | 2,74  | 0,021323 | 0,481727 |                          |
| TC1000000661.mm.1 | 1,44 Ank3    | PSR1000004551.mm.1 | 2,53  | 0,010174 | 0,419711 | Cassette Exon 0,16       |
| TC1000000661.mm.1 | 1,44 Ank3    | JUC1000002521.mm.1 | 2,44  | 0,035976 | 0,529472 |                          |
| TC1000000661.mm.1 | 1,44 Ank3    | JUC1000002519.mm.1 | 2,08  | 0,014899 | 0,451802 |                          |
| TC1000000661.mm.1 | 1,44 Ank3    | JUC1000002487.mm.1 | 2,06  | 0,02257  | 0,487325 |                          |
| TC1000000661.mm.1 | 1,44 Ank3    | PSR1000004583.mm.1 | -2,04 | 0,000272 | 0,28803  | Cassette Exon 0,12       |
| TC1000000661.mm.1 | 1,44 Ank3    | PSR1000004574.mm.1 | -2,07 | 0,010397 | 0,421447 | Cassette Exon 0,19       |
| TC1000000661.mm.1 | 1,44 Ank3    | PSR1000004581.mm.1 | -2,07 | 0,007908 | 0,403819 | Cassette Exon 0,12       |
| TC1000000661.mm.1 | 1,44 Ank3    | JUC1000002506.mm.1 | -2,19 | 0,025407 | 0,497403 |                          |
| TC1000000661.mm.1 | 1,44 Ank3    | JUC1000002502.mm.1 | -2,24 | 0,015387 | 0,453849 |                          |
| TC1000000661.mm.1 | 1,44 Ank3    | PSR1000004656.mm.1 | -2,3  | 0,004768 | 0,371039 | Alternative 5' Donc 0,21 |
| TC1000000661.mm.1 | 1,44 Ank3    | JUC1000002530.mm.1 | -2,57 | 0,007196 | 0,397947 |                          |
| TC1000000661.mm.1 | 1,44 Ank3    | JUC1000002529.mm.1 | -3,04 | 0,012203 | 0,433268 |                          |
| TC1000000661.mm.1 | 1,44 Ank3    | JUC1000002503.mm.1 | -3,51 | 0,015008 | 0,452083 |                          |
| TC0300000236.mm.1 | 1,01 Fxr1    | JUC0300000752.mm.1 | 7,26  | 0,023188 | 0,490032 |                          |
| TC1400000804.mm.1 | -1,1 Atp12a  | JUC1400003486.mm.1 | 7,21  | 0,00574  | 0,382993 |                          |
| TC0100001812.mm.1 | 2,94 Ush2a   | JUC0100008557.mm.1 | 7,16  | 0,000942 | 0,313363 |                          |
| TC0100001812.mm.1 | 2,94 Ush2a   | JUC0100008576.mm.1 | 4,66  | 0,034418 | 0,525828 |                          |
| TC0100001812.mm.1 | 2,94 Ush2a   | JUC0100008558.mm.1 | 4,5   | 0,031527 | 0,517029 |                          |
| TC0100001812.mm.1 | 2,94 Ush2a   | PSR0100015045.mm.1 | 4,21  | 0,026811 | 0,502373 | Cassette Exon 0,43       |
| TC0100001812.mm.1 | 2,94 Ush2a   | JUC0100008594.mm.1 | 4,12  | 0,000513 | 0,303579 |                          |
| TC0100001812.mm.1 | 2,94 Ush2a   | JUC0100008554.mm.1 | 4,04  | 0,001527 | 0,330287 |                          |
| TC0100001812.mm.1 | 2,94 Ush2a   | PSR0100015073.mm.1 | 3,47  | 0,001319 | 0,324348 | Cassette Exon 0,24       |
| TC0100001812.mm.1 | 2,94 Ush2a   | JUC0100008597.mm.1 | 3,38  | 0,016535 | 0,459612 |                          |
| TC0100001812.mm.1 | 2,94 Ush2a   | JUC0100008586.mm.1 | 3,37  | 0,004867 | 0,371692 |                          |
| TC0100001812.mm.1 | 2,94 Ush2a   | PSR0100015049.mm.1 | 3,35  | 0,010556 | 0,422341 | Cassette Exon 0,16       |
| TC0100001812.mm.1 | 2,94 Ush2a   | PSR0100015044.mm.1 | 3,33  | 0,024328 | 0,49362  | Cassette Exon 0,49       |
| TC0100001812.mm.1 | 2,94 Ush2a   | PSR0100015046.mm.1 | 3,1   | 0,047268 | 0,558223 | Cassette Exon 0,23       |
| TC0100001812.mm.1 | 2,94 Ush2a   | PSR0100015033.mm.1 | 3,09  | 0,017536 | 0,464105 | Cassette Exon 0,35       |
| TC0100001812.mm.1 | 2,94 Ush2a   | JUC0100008546.mm.1 | 2,84  | 0,008871 | 0,410539 |                          |
| TC0100001812.mm.1 | 2,94 Ush2a   | PSR0100015037.mm.1 | 2,82  | 0,000603 | 0,304044 | Cassette Exon 0,25       |
| TC0100001812.mm.1 | 2,94 Ush2a   | PSR0100015043.mm.1 | 2,59  | 0,013072 | 0,4396   | Cassette Exon 0,32       |
| TC0100001812.mm.1 | 2,94 Ush2a   | JUC0100008545.mm.1 | 2,54  | 0,037711 | 0,534583 |                          |
| TC0100001812.mm.1 | 2,94 Ush2a   | PSR0100015031.mm.1 | 2,53  | 0,016809 | 0,460623 | Cassette Exon 0,18       |
| TC0100001812.mm.1 | 2,94 Ush2a   | JUC0100008550.mm.1 | 2,31  | 0,023081 | 0,489691 |                          |
| TC0100001812.mm.1 | 2,94 Ush2a   | JUC0100008568.mm.1 | 2,18  | 0,023616 | 0,491012 |                          |

|                   |      |                |                    |        |          |          |                     |      |
|-------------------|------|----------------|--------------------|--------|----------|----------|---------------------|------|
| TC0100001812.mm.1 | 2,94 | Ush2a          | PSR0100015042.mm.1 | 2,08   | 0,029929 | 0,511499 | Cassette Exon       | 0,12 |
| TC0100001812.mm.1 | 2,94 | Ush2a          | PSR0100015059.mm.1 | 2,08   | 0,001461 | 0,328635 | Cassette Exon       | 0,11 |
| TC0100001812.mm.1 | 2,94 | Ush2a          | PSR0100015032.mm.1 | 2,04   | 0,008172 | 0,405603 | Cassette Exon       | 0,21 |
| TC0100001812.mm.1 | 2,94 | Ush2a          | PSR0100015066.mm.1 | -2,02  | 0,002844 | 0,352207 | Cassette Exon       | 0,1  |
| TC0100001812.mm.1 | 2,94 | Ush2a          | PSR0100015082.mm.1 | -2,13  | 0,013711 | 0,444758 | Cassette Exon       | 0,27 |
| TC0100001812.mm.1 | 2,94 | Ush2a          | PSR0100015100.mm.1 | -2,22  | 0,031417 | 0,516531 | Cassette Exon       | 0,14 |
| TC0100001812.mm.1 | 2,94 | Ush2a          | PSR0100015089.mm.1 | -2,44  | 0,036259 | 0,530445 | Cassette Exon       | 0,13 |
| TC0100001812.mm.1 | 2,94 | Ush2a          | JUC0100008612.mm.1 | -2,5   | 0,016307 | 0,458523 |                     |      |
| TC0100001812.mm.1 | 2,94 | Ush2a          | PSR0100015094.mm.1 | -2,56  | 0,000609 | 0,304044 | Cassette Exon       | 0,19 |
| TC0100001812.mm.1 | 2,94 | Ush2a          | JUC0100008581.mm.1 | -2,56  | 0,034488 | 0,525929 |                     |      |
| TC0100001812.mm.1 | 2,94 | Ush2a          | JUC0100008572.mm.1 | -2,59  | 0,001794 | 0,336311 |                     |      |
| TC0100001812.mm.1 | 2,94 | Ush2a          | JUC0100008602.mm.1 | -2,61  | 0,018237 | 0,467691 |                     |      |
| TC0100001812.mm.1 | 2,94 | Ush2a          | PSR0100015093.mm.1 | -2,85  | 0,000252 | 0,28803  | Cassette Exon       | 0,23 |
| TC0100001812.mm.1 | 2,94 | Ush2a          | PSR0100015102.mm.1 | -2,99  | 0,004205 | 0,363236 | Cassette Exon       | 0,39 |
| TC0100001812.mm.1 | 2,94 | Ush2a          | JUC0100008598.mm.1 | -3,03  | 0,007974 | 0,403853 |                     |      |
| TC0100001812.mm.1 | 2,94 | Ush2a          | JUC0100008569.mm.1 | -3,15  | 0,009269 | 0,414688 |                     |      |
| TC0100001812.mm.1 | 2,94 | Ush2a          | PSR0100015104.mm.1 | -3,24  | 0,007464 | 0,400381 | Cassette Exon       | 0,28 |
| TC0100001812.mm.1 | 2,94 | Ush2a          | PSR0100015106.mm.1 | -3,24  | 0,012333 | 0,434392 | Alternative 5' Donc | 0,26 |
| TC0100001812.mm.1 | 2,94 | Ush2a          | JUC0100008543.mm.1 | -3,4   | 0,031756 | 0,517489 |                     |      |
| TC0100001812.mm.1 | 2,94 | Ush2a          | PSR0100015050.mm.1 | -3,63  | 0,010577 | 0,422452 | Alternative 5' Donc | 0,29 |
| TC0100001812.mm.1 | 2,94 | Ush2a          | PSR0100015028.mm.1 | -3,74  | 0,002043 | 0,341377 | Cassette Exon       | 0,39 |
| TC0100001812.mm.1 | 2,94 | Ush2a          | JUC0100008547.mm.1 | -3,96  | 0,002892 | 0,352207 |                     |      |
| TC0100001812.mm.1 | 2,94 | Ush2a          | JUC0100008591.mm.1 | -4,01  | 0,045511 | 0,554359 |                     |      |
| TC0100001812.mm.1 | 2,94 | Ush2a          | PSR0100015070.mm.1 | -4,02  | 0,004721 | 0,370888 | Alternative 5' Donc | 0,35 |
| TC0100001812.mm.1 | 2,94 | Ush2a          | JUC0100008593.mm.1 | -4,41  | 0,001884 | 0,338712 |                     |      |
| TC0100001812.mm.1 | 2,94 | Ush2a          | JUC0100008564.mm.1 | -4,41  | 0,02436  | 0,49362  |                     |      |
| TC0100001812.mm.1 | 2,94 | Ush2a          | JUC0100008582.mm.1 | -4,61  | 0,00604  | 0,386586 |                     |      |
| TC0100001812.mm.1 | 2,94 | Ush2a          | PSR0100015098.mm.1 | -4,86  | 0,01802  | 0,466939 | Cassette Exon       | 0,28 |
| TC0100001812.mm.1 | 2,94 | Ush2a          | JUC0100008588.mm.1 | -5,94  | 0,011495 | 0,428152 |                     |      |
| TC0100001812.mm.1 | 2,94 | Ush2a          | JUC0100008563.mm.1 | -8,24  | 0,000729 | 0,306408 |                     |      |
| TC0100001812.mm.1 | 2,94 | Ush2a          | JUC0100008615.mm.1 | -10,91 | 0,002818 | 0,352207 |                     |      |
| TC0800002595.mm.1 | 2,14 | Mast1; Gm24197 | JUC0800010794.mm.1 | 7,13   | 0,006628 | 0,392592 |                     |      |
| TC0800002595.mm.1 | 2,14 | Mast1; Gm24197 | PSR0800019858.mm.1 | 5,3    | 0,002239 | 0,34578  |                     |      |
| TC0800002595.mm.1 | 2,14 | Mast1; Gm24197 | JUC0800010811.mm.1 | 3,25   | 0,001308 | 0,323877 |                     |      |
| TC0800002595.mm.1 | 2,14 | Mast1; Gm24197 | PSR0800019862.mm.1 | 3      | 0,005795 | 0,383104 | Cassette Exon       | 0,45 |
| TC0800002595.mm.1 | 2,14 | Mast1; Gm24197 | JUC0800010817.mm.1 | 2,99   | 0,00849  | 0,406966 |                     |      |
| TC0800002595.mm.1 | 2,14 | Mast1; Gm24197 | JUC0800010799.mm.1 | 2,58   | 0,001748 | 0,335996 |                     |      |
| TC0800002595.mm.1 | 2,14 | Mast1; Gm24197 | PSR0800019861.mm.1 | 2,45   | 0,014793 | 0,450911 | Cassette Exon       | 0,45 |
| TC0800002595.mm.1 | 2,14 | Mast1; Gm24197 | PSR0800019875.mm.1 | 2,12   | 0,005604 | 0,381115 |                     |      |
| TC0800002595.mm.1 | 2,14 | Mast1; Gm24197 | PSR0800019851.mm.1 | -2,02  | 0,032481 | 0,519641 | Alternative 3' Acce | 0,17 |
| TC0800002595.mm.1 | 2,14 | Mast1; Gm24197 | PSR0800019892.mm.1 | -2,11  | 0,003236 | 0,354243 | Alternative 3' Acce | 0,06 |
| TC0800002595.mm.1 | 2,14 | Mast1; Gm24197 | PSR0800019894.mm.1 | -2,12  | 0,008261 | 0,405976 | Alternative 5' Donc | 0,18 |
| TC0800002595.mm.1 | 2,14 | Mast1; Gm24197 | PSR0800019895.mm.1 | -2,21  | 0,001915 | 0,339733 | Alternative 3' Acce | 0,12 |
| TC0800002595.mm.1 | 2,14 | Mast1; Gm24197 | JUC0800010801.mm.1 | -2,23  | 0,008614 | 0,408434 |                     |      |
| TC0800002595.mm.1 | 2,14 | Mast1; Gm24197 | PSR0800019865.mm.1 | -2,25  | 0,008546 | 0,408059 |                     |      |
| TC0800002595.mm.1 | 2,14 | Mast1; Gm24197 | PSR0800019884.mm.1 | -2,33  | 0,019424 | 0,473956 | Alternative 5' Donc | 0,02 |
| TC0800002595.mm.1 | 2,14 | Mast1; Gm24197 | PSR0800019886.mm.1 | -2,49  | 0,006217 | 0,387912 | Alternative 5' Donc | 0,02 |
| TC0800002595.mm.1 | 2,14 | Mast1; Gm24197 | PSR0800019855.mm.1 | -2,68  | 0,012059 | 0,432426 | Cassette Exon       | 0,28 |

|                   |                          |                    |       |          |          |                     |      |
|-------------------|--------------------------|--------------------|-------|----------|----------|---------------------|------|
| TC0800002595.mm.1 | 2,14 Mast1; Gm24197      | PSR0800019850.mm.1 | -2,76 | 0,001155 | 0,317344 | Alternative 3' Acce | 0,17 |
| TC0800002595.mm.1 | 2,14 Mast1; Gm24197      | PSR0800019872.mm.1 | -2,92 | 0,001348 | 0,325427 | Intron Retention    | 0,44 |
| TC0800002595.mm.1 | 2,14 Mast1; Gm24197      | PSR0800019878.mm.1 | -3,05 | 0,001841 | 0,337414 | Intron Retention    | 0,49 |
| TC0800002595.mm.1 | 2,14 Mast1; Gm24197      | JUC0800010809.mm.1 | -3,14 | 0,000994 | 0,316361 |                     |      |
| TC0800002595.mm.1 | 2,14 Mast1; Gm24197      | JUC0800010820.mm.1 | -3,29 | 0,001665 | 0,335182 |                     |      |
| TC0800002595.mm.1 | 2,14 Mast1; Gm24197      | JUC0800010815.mm.1 | -3,67 | 0,010407 | 0,42148  |                     |      |
| TC0800002595.mm.1 | 2,14 Mast1; Gm24197      | JUC0800010819.mm.1 | -3,86 | 0,040648 | 0,54264  |                     |      |
| TC0800002595.mm.1 | 2,14 Mast1; Gm24197      | JUC0800010806.mm.1 | -5,39 | 0,000314 | 0,288663 |                     |      |
| TC1700000117.mm.1 | -1,24 Agpat4             | JUC1700000520.mm.1 | 7,13  | 0,000935 | 0,313363 |                     |      |
| TC0900000737.mm.1 | 1,35 Nptn                | JUC0900002867.mm.1 | 7,12  | 0,008236 | 0,405976 |                     |      |
| TC0900000737.mm.1 | 1,35 Nptn                | JUC0900002868.mm.1 | 4,76  | 0,033438 | 0,522793 |                     |      |
| TC0900000737.mm.1 | 1,35 Nptn                | PSR0900005431.mm.1 | 3,16  | 0,033842 | 0,524033 | Cassette Exon       | 0,48 |
| TC0900000737.mm.1 | 1,35 Nptn                | PSR0900005449.mm.1 | -2,05 | 0,008762 | 0,409779 | Intron Retention    | 0,26 |
| TC0900000737.mm.1 | 1,35 Nptn                | JUC0900002881.mm.1 | -3,17 | 0,010948 | 0,425002 |                     |      |
| TC1600000374.mm.1 | -1,1 Cldn16              | JUC1600001849.mm.1 | 7,12  | 0,028411 | 0,507154 |                     |      |
| TC1100001072.mm.1 | 1,63 Slc43a2             | JUC1100005138.mm.1 | 7,07  | 0,039726 | 0,540494 |                     |      |
| TC0600001429.mm.1 | -1,2 Gm20531             | JUC0600006081.mm.1 | 7,04  | 0,04779  | 0,559217 |                     |      |
| TC1100001830.mm.1 | -1,16 Amz2; LOC100503496 | PSR1100017240.mm.1 | 6,99  | 0,00229  | 0,34605  | Cassette Exon       | 0,32 |
| TC1100001830.mm.1 | -1,16 Amz2; LOC100503496 | PSR1100017239.mm.1 | 3,81  | 0,004484 | 0,367949 | Cassette Exon       | 0,33 |
| TC1100001830.mm.1 | -1,16 Amz2; LOC100503496 | PSR1100017241.mm.1 | 3,5   | 0,015656 | 0,455329 | Cassette Exon       | 0,32 |
| TC1100001830.mm.1 | -1,16 Amz2; LOC100503496 | PSR1100017225.mm.1 | 2,08  | 0,035681 | 0,529027 | Alternative 5' Donc | 0,13 |
| TC0700000165.mm.1 | 4,34 Cabp5               | JUC0700000635.mm.1 | 6,96  | 0,000233 | 0,28803  |                     |      |
| TC0700000165.mm.1 | 4,34 Cabp5               | JUC0700000636.mm.1 | 3,64  | 0,000469 | 0,298999 |                     |      |
| TC0700000165.mm.1 | 4,34 Cabp5               | PSR0700001321.mm.1 | -2,41 | 0,010329 | 0,42079  | Cassette Exon       | 0,23 |
| TC0700000165.mm.1 | 4,34 Cabp5               | JUC0700000632.mm.1 | -3,2  | 0,037253 | 0,53345  |                     |      |
| TC0700000165.mm.1 | 4,34 Cabp5               | JUC0700000637.mm.1 | -9,1  | 0,009904 | 0,418332 |                     |      |
| TC0300000137.mm.1 | 1,66 Cp                  | JUC0300000254.mm.1 | 6,89  | 0,021617 | 0,483425 |                     |      |
| TC0300000137.mm.1 | 1,66 Cp                  | PSR0300000632.mm.1 | -2,14 | 0,011276 | 0,426813 | Alternative 5' Donc | 0,07 |
| TC0300000137.mm.1 | 1,66 Cp                  | PSR0300000587.mm.1 | -2,26 | 0,029427 | 0,509995 | Alternative 3' Acce | 0,19 |
| TC0300000137.mm.1 | 1,66 Cp                  | PSR0300000611.mm.1 | -2,87 | 0,015144 | 0,452699 | Alternative 5' Donc | 0,3  |
| TC0300000137.mm.1 | 1,66 Cp                  | PSR0300000602.mm.1 | -3,46 | 0,00172  | 0,335996 | Alternative 3' Acce | 0,41 |
| TC0500000050.mm.1 | 1,07 Abcb1a              | JUC0500000221.mm.1 | 6,89  | 0,024712 | 0,494838 |                     |      |
| TC0500000050.mm.1 | 1,07 Abcb1a              | JUC0500000213.mm.1 | 3,71  | 0,006714 | 0,393343 |                     |      |
| TC0500000050.mm.1 | 1,07 Abcb1a              | JUC0500000231.mm.1 | 2,69  | 0,017585 | 0,464264 |                     |      |
| TC0500000050.mm.1 | 1,07 Abcb1a              | PSR0500000418.mm.1 | 2,41  | 0,045633 | 0,554672 | Cassette Exon       | 0,31 |
| TC0900000197.mm.1 | -1,04 Dnm2               | JUC0900000717.mm.1 | 6,88  | 0,033494 | 0,522941 |                     |      |
| TC0900000197.mm.1 | -1,04 Dnm2               | JUC0900000713.mm.1 | -2,16 | 0,008708 | 0,409126 |                     |      |
| TC1900000025.mm.1 | 1,46 Cabp2               | JUC1900000163.mm.1 | 6,87  | 0,024878 | 0,49558  |                     |      |
| TC1900000025.mm.1 | 1,46 Cabp2               | PSR1900000316.mm.1 | 3,18  | 0,019431 | 0,473969 | Alternative 5' Donc | 0,35 |
| TC1900000025.mm.1 | 1,46 Cabp2               | PSR1900000302.mm.1 | -2,79 | 0,003954 | 0,359922 | Cassette Exon       | 0,19 |
| TC0400000269.mm.1 | -1,09 Casp8ap2           | JUC0400000763.mm.1 | 6,85  | 0,01629  | 0,458454 |                     |      |
| TC1400000359.mm.1 | 2,7 Gm626                | JUC1400001900.mm.1 | 6,84  | 0,000044 | 0,24627  |                     |      |
| TC1400000359.mm.1 | 2,7 Gm626                | JUC1400001896.mm.1 | 5,1   | 0,023742 | 0,491602 |                     |      |
| TC1400000359.mm.1 | 2,7 Gm626                | PSR1400003196.mm.1 | 3,65  | 0,003998 | 0,361023 | Cassette Exon       | 0,4  |
| TC1400000359.mm.1 | 2,7 Gm626                | JUC1400001897.mm.1 | 3,44  | 0,009837 | 0,417839 |                     |      |
| TC1400000359.mm.1 | 2,7 Gm626                | PSR1400003198.mm.1 | 3,3   | 0,025022 | 0,496091 | Cassette Exon       | 0,26 |
| TC1400000359.mm.1 | 2,7 Gm626                | PSR1400003213.mm.1 | 2,88  | 0,017346 | 0,46353  | Cassette Exon       | 0,18 |
| TC1400000359.mm.1 | 2,7 Gm626                | PSR1400003195.mm.1 | 2,57  | 0,003575 | 0,356223 | Cassette Exon       | 0,16 |

|                   |                    |                    |       |          |          |                     |      |
|-------------------|--------------------|--------------------|-------|----------|----------|---------------------|------|
| TC1400000359.mm.1 | 2,7 Gm626          | PSR1400003188.mm.1 | 2,18  | 0,012136 | 0,432868 |                     |      |
| TC1400000359.mm.1 | 2,7 Gm626          | JUC1400001888.mm.1 | 2,14  | 0,040331 | 0,541841 |                     |      |
| TC1400000359.mm.1 | 2,7 Gm626          | PSR1400003194.mm.1 | 2,13  | 0,007382 | 0,39943  | Cassette Exon       | 0,21 |
| TC1400000359.mm.1 | 2,7 Gm626          | JUC1400001917.mm.1 | -2,09 | 0,015597 | 0,454998 |                     |      |
| TC1400000359.mm.1 | 2,7 Gm626          | PSR1400003210.mm.1 | -2,31 | 0,010203 | 0,419711 | Cassette Exon       | 0,25 |
| TC1400000359.mm.1 | 2,7 Gm626          | JUC1400001893.mm.1 | -2,32 | 0,010369 | 0,421259 |                     |      |
| TC1400000359.mm.1 | 2,7 Gm626          | PSR1400003190.mm.1 | -2,39 | 0,007622 | 0,401947 | Cassette Exon       | 0,32 |
| TC1400000359.mm.1 | 2,7 Gm626          | PSR1400003189.mm.1 | -2,68 | 0,001727 | 0,335996 | Cassette Exon       | 0,33 |
| TC1400000359.mm.1 | 2,7 Gm626          | JUC1400001916.mm.1 | -3,15 | 0,016491 | 0,459391 |                     |      |
| TC1400000359.mm.1 | 2,7 Gm626          | PSR1400003208.mm.1 | -3,17 | 0,002457 | 0,349135 | Cassette Exon       | 0,31 |
| TC1400000359.mm.1 | 2,7 Gm626          | JUC1400001914.mm.1 | -3,43 | 0,008839 | 0,410293 |                     |      |
| TC1400000359.mm.1 | 2,7 Gm626          | JUC1400001892.mm.1 | -3,48 | 0,017667 | 0,464753 |                     |      |
| TC1400000359.mm.1 | 2,7 Gm626          | JUC1400001911.mm.1 | -3,73 | 0,003433 | 0,355303 |                     |      |
| TC1400000359.mm.1 | 2,7 Gm626          | JUC1400001894.mm.1 | -3,94 | 0,042969 | 0,54838  |                     |      |
| TC1400000359.mm.1 | 2,7 Gm626          | JUC1400001889.mm.1 | -4,34 | 0,002776 | 0,35099  |                     |      |
| TC1400000359.mm.1 | 2,7 Gm626          | JUC1400001908.mm.1 | -4,87 | 0,000507 | 0,303579 |                     |      |
| TC0900001213.mm.1 | 1                  | PSR0900009570.mm.1 | 6,84  | 0,002427 | 0,349    | Cassette Exon       | 0,29 |
| TC0600001266.mm.1 | 7,01 Slc6a11       | JUC0600005155.mm.1 | 6,83  | 0,000112 | 0,267977 |                     |      |
| TC0600001266.mm.1 | 7,01 Slc6a11       | JUC0600005156.mm.1 | 3,01  | 0,000943 | 0,313363 |                     |      |
| TC0600001266.mm.1 | 7,01 Slc6a11       | PSR0600009968.mm.1 | 2,78  | 0,006393 | 0,389654 | Cassette Exon       | 0,23 |
| TC0600001266.mm.1 | 7,01 Slc6a11       | JUC0600005149.mm.1 | 2,67  | 0,014612 | 0,449914 |                     |      |
| TC0600001266.mm.1 | 7,01 Slc6a11       | PSR0600009960.mm.1 | 2,45  | 0,002971 | 0,352501 | Mutually Exclusive  | 0,25 |
| TC0600001266.mm.1 | 7,01 Slc6a11       | PSR0600009967.mm.1 | 2,21  | 0,003884 | 0,359203 | Cassette Exon       | 0,34 |
| TC0600001266.mm.1 | 7,01 Slc6a11       | PSR0600009958.mm.1 | 2,01  | 0,004922 | 0,373082 | Cassette Exon       | 0,07 |
| TC0600001266.mm.1 | 7,01 Slc6a11       | PSR0600009963.mm.1 | -2,06 | 0,005985 | 0,386164 | Cassette Exon       | 0,14 |
| TC0600001266.mm.1 | 7,01 Slc6a11       | PSR0600009956.mm.1 | -2,26 | 0,016376 | 0,458693 | Cassette Exon       | 0,16 |
| TC0600001266.mm.1 | 7,01 Slc6a11       | PSR0600009959.mm.1 | -2,34 | 0,00321  | 0,354243 | Mutually Exclusive  | 0,25 |
| TC0600001266.mm.1 | 7,01 Slc6a11       | JUC0600005152.mm.1 | -2,43 | 0,008687 | 0,408815 |                     |      |
| TC0600001266.mm.1 | 7,01 Slc6a11       | PSR0600009964.mm.1 | -2,89 | 0,008957 | 0,411476 | Cassette Exon       | 0,36 |
| TC0600001266.mm.1 | 7,01 Slc6a11       | JUC0600005153.mm.1 | -3,68 | 0,003621 | 0,356223 |                     |      |
| TC0100003271.mm.1 | -1,18 Smg7         | JUC0100015127.mm.1 | 6,82  | 0,005894 | 0,383835 |                     |      |
| TC0100003271.mm.1 | -1,18 Smg7         | PSR0100026555.mm.1 | 2,17  | 0,002602 | 0,349501 | Cassette Exon       | 0,34 |
| TC0100001237.mm.1 | 1,24 Syt2          | JUC0100005858.mm.1 | 6,81  | 0,00076  | 0,308387 |                     |      |
| TC0100001237.mm.1 | 1,24 Syt2          | JUC0100005853.mm.1 | -3,14 | 0,024104 | 0,493195 |                     |      |
| TC0100001237.mm.1 | 1,24 Syt2          | JUC0100005855.mm.1 | -3,19 | 0,010204 | 0,419711 |                     |      |
| TC0400002220.mm.1 | 1,35 Tmem67        | JUC0400009707.mm.1 | 6,79  | 0,009907 | 0,418378 |                     |      |
| TC0400002220.mm.1 | 1,35 Tmem67        | JUC0400009691.mm.1 | -2,14 | 0,00983  | 0,417839 |                     |      |
| TC0700004661.mm.1 | 1,09 Prrt2; Pagr1a | JUC0700019087.mm.1 | 6,77  | 0,004357 | 0,365487 |                     |      |
| TC0700004661.mm.1 | 1,09 Prrt2; Pagr1a | JUC0700019088.mm.1 | 4,94  | 0,012766 | 0,437119 |                     |      |
| TC1000002256.mm.1 | 2,39 Hk1           | JUC1000008784.mm.1 | 6,75  | 0,002876 | 0,352207 |                     |      |
| TC1000002256.mm.1 | 2,39 Hk1           | JUC1000008767.mm.1 | 3,44  | 0,018258 | 0,467907 |                     |      |
| TC1000002256.mm.1 | 2,39 Hk1           | PSR1000016012.mm.1 | -2,26 | 0,00381  | 0,358103 | Alternative 3' Acce | 0,22 |
| TC1000002256.mm.1 | 2,39 Hk1           | PSR1000016044.mm.1 | -2,29 | 0,020882 | 0,479589 | Cassette Exon       | 0,28 |
| TC1000002256.mm.1 | 2,39 Hk1           | PSR1000016001.mm.1 | -2,32 | 0,00168  | 0,335182 | Alternative 3' Acce | 0,19 |
| TC1000002256.mm.1 | 2,39 Hk1           | PSR1000016038.mm.1 | -2,55 | 0,013697 | 0,44468  | Cassette Exon       | 0,14 |
| TC1000002256.mm.1 | 2,39 Hk1           | PSR1000016042.mm.1 | -2,59 | 0,008326 | 0,406313 |                     |      |
| TC1000002256.mm.1 | 2,39 Hk1           | PSR1000016041.mm.1 | -2,84 | 0,002339 | 0,347265 | Cassette Exon       | 0,2  |
| TC1000002256.mm.1 | 2,39 Hk1           | JUC1000008786.mm.1 | -2,88 | 0,015101 | 0,452453 |                     |      |



|                  |              |                    |       |          |                              |      |
|------------------|--------------|--------------------|-------|----------|------------------------------|------|
| TC100002256.mm.1 | 2,39 Hk1     | PSR1000016034.mm.1 | -2,99 | 0,000677 | 0,304338 Alternative 5' Donc | 0,19 |
| TC100002256.mm.1 | 2,39 Hk1     | PSR1000016050.mm.1 | -3,03 | 0,000135 | 0,270905 Cassette Exon       | 0,32 |
| TC100002256.mm.1 | 2,39 Hk1     | PSR1000016048.mm.1 | -3,13 | 0,003007 | 0,353447 Alternative 5' Donc | 0,32 |
| TC100002256.mm.1 | 2,39 Hk1     | PSR1000016045.mm.1 | -3,22 | 0,000357 | 0,290838 Cassette Exon       | 0,28 |
| TC100002256.mm.1 | 2,39 Hk1     | PSR1000016031.mm.1 | -3,27 | 0,00649  | 0,39078 Cassette Exon        | 0,41 |
| TC100002256.mm.1 | 2,39 Hk1     | PSR1000016035.mm.1 | -3,29 | 0,001328 | 0,325252 Cassette Exon       | 0,21 |
| TC100002256.mm.1 | 2,39 Hk1     | JUC1000008794.mm.1 | -3,61 | 0,000713 | 0,306015                     |      |
| TC100002256.mm.1 | 2,39 Hk1     | JUC1000008793.mm.1 | -4,01 | 0,000651 | 0,304044                     |      |
| TC100002256.mm.1 | 2,39 Hk1     | JUC1000008787.mm.1 | -4,2  | 0,0081   | 0,405071                     |      |
| TC100002256.mm.1 | 2,39 Hk1     | PSR1000016040.mm.1 | -4,66 | 0,008562 | 0,40821 Alternative 5' Donc  | 0,58 |
| TC100002256.mm.1 | 2,39 Hk1     | JUC1000008776.mm.1 | -4,76 | 0,007419 | 0,399901                     |      |
| TC100002256.mm.1 | 2,39 Hk1     | JUC1000008781.mm.1 | -5,94 | 0,000476 | 0,298999                     |      |
| TC100002256.mm.1 | 2,39 Hk1     | JUC1000008788.mm.1 | -6,17 | 0,000075 | 0,251428                     |      |
| TC140000076.mm.1 | -1,51 Pxx    | JUC1400000439.mm.1 | 6,74  | 0,002165 | 0,344238                     |      |
| TC140000076.mm.1 | -1,51 Pxx    | PSR1400000712.mm.1 | 4,29  | 0,012713 | 0,436535 Cassette Exon       | 0,47 |
| TC140000076.mm.1 | -1,51 Pxx    | PSR1400000690.mm.1 | 2,04  | 0,011098 | 0,426 Cassette Exon          | 0,14 |
| TC050002919.mm.1 | -1,27 Tgfbr3 | JUC0500014070.mm.1 | 6,74  | 0,012118 | 0,432777                     |      |
| TC050002028.mm.1 | 1,31 Reln    | JUC0500010057.mm.1 | 6,72  | 0,018156 | 0,467427                     |      |
| TC050002028.mm.1 | 1,31 Reln    | PSR0500018462.mm.1 | -2,02 | 0,002541 | 0,349501 Cassette Exon       | 0,15 |
| TC050002028.mm.1 | 1,31 Reln    | JUC0500010088.mm.1 | -2,18 | 0,016171 | 0,457969                     |      |
| TC050002028.mm.1 | 1,31 Reln    | JUC0500010050.mm.1 | -2,3  | 0,035144 | 0,527898                     |      |
| TC050002028.mm.1 | 1,31 Reln    | JUC0500010048.mm.1 | -2,38 | 0,018957 | 0,471398                     |      |
| TC050002028.mm.1 | 1,31 Reln    | JUC0500010068.mm.1 | -2,52 | 0,028648 | 0,507908                     |      |
| TC050002028.mm.1 | 1,31 Reln    | JUC0500010116.mm.1 | -2,62 | 0,009755 | 0,417839                     |      |
| TC050002028.mm.1 | 1,31 Reln    | PSR0500018451.mm.1 | -2,78 | 0,035688 | 0,529027 Alternative 3' Acce | 0,09 |
| TC050002028.mm.1 | 1,31 Reln    | PSR0500018454.mm.1 | -2,9  | 0,017914 | 0,466466 Alternative 3' Acce | 0,33 |
| TC050002028.mm.1 | 1,31 Reln    | PSR0500018489.mm.1 | -3,57 | 0,011312 | 0,427133 Alternative 3' Acce | 0,28 |
| TC060003537.mm.1 | -1,17 Clec9a | JUC0600006586.mm.1 | 6,7   | 0,00892  | 0,410901                     |      |
| TC010003604.mm.1 | 2,98 Rgs7    | JUC0100016856.mm.1 | 6,69  | 0,004207 | 0,363236                     |      |
| TC010003604.mm.1 | 2,98 Rgs7    | PSR0100029645.mm.1 | 6,05  | 0,000215 | 0,28803 Cassette Exon        | 0,44 |
| TC010003604.mm.1 | 2,98 Rgs7    | JUC0100016858.mm.1 | 4,86  | 0,000132 | 0,270905                     |      |
| TC010003604.mm.1 | 2,98 Rgs7    | PSR0100029647.mm.1 | 4,52  | 0,004439 | 0,367041 Alternative 5' Donc | 0,45 |
| TC010003604.mm.1 | 2,98 Rgs7    | JUC0100016857.mm.1 | 3,88  | 0,004322 | 0,364614                     |      |
| TC010003604.mm.1 | 2,98 Rgs7    | PSR0100029643.mm.1 | 3,84  | 0,000951 | 0,313363 Cassette Exon       | 0,53 |
| TC010003604.mm.1 | 2,98 Rgs7    | PSR0100029642.mm.1 | 3,68  | 0,006258 | 0,388622 Cassette Exon       | 0,4  |
| TC010003604.mm.1 | 2,98 Rgs7    | PSR0100029640.mm.1 | 3,6   | 0,01133  | 0,427232 Cassette Exon       | 0,31 |
| TC010003604.mm.1 | 2,98 Rgs7    | PSR0100029641.mm.1 | 2,77  | 0,003475 | 0,355628 Cassette Exon       | 0,24 |
| TC010003604.mm.1 | 2,98 Rgs7    | PSR0100029624.mm.1 | 2,65  | 0,008425 | 0,406611 Cassette Exon       | 0,19 |
| TC010003604.mm.1 | 2,98 Rgs7    | PSR0100029638.mm.1 | 2,64  | 0,013939 | 0,446202 Cassette Exon       | 0,18 |
| TC010003604.mm.1 | 2,98 Rgs7    | PSR0100029634.mm.1 | 2,56  | 0,000103 | 0,262646 Cassette Exon       | 0,14 |
| TC010003604.mm.1 | 2,98 Rgs7    | PSR0100029629.mm.1 | 2,54  | 0,005115 | 0,376246 Cassette Exon       | 0,24 |
| TC010003604.mm.1 | 2,98 Rgs7    | PSR0100029639.mm.1 | 2,42  | 0,00142  | 0,327268 Cassette Exon       | 0,14 |
| TC010003604.mm.1 | 2,98 Rgs7    | JUC0100016854.mm.1 | 2,42  | 0,004664 | 0,370181                     |      |
| TC010003604.mm.1 | 2,98 Rgs7    | PSR0100029623.mm.1 | 2,19  | 0,003326 | 0,354243 Cassette Exon       | 0,17 |
| TC010003604.mm.1 | 2,98 Rgs7    | JUC0100016850.mm.1 | 2,15  | 0,046313 | 0,556186                     |      |
| TC010003604.mm.1 | 2,98 Rgs7    | PSR0100029648.mm.1 | -2,64 | 0,033153 | 0,521956 Cassette Exon       | 0,18 |
| TC010003604.mm.1 | 2,98 Rgs7    | JUC0100016842.mm.1 | -2,82 | 0,011835 | 0,43053                      |      |
| TC010003604.mm.1 | 2,98 Rgs7    | PSR0100029625.mm.1 | -3,01 | 0,023242 | 0,490032 Cassette Exon       | 0,19 |

|                   |                             |                    |        |          |                              |      |
|-------------------|-----------------------------|--------------------|--------|----------|------------------------------|------|
| TC0100003604.mm.1 | 2,98 Rgs7                   | PSR0100029628.mm.1 | -3,19  | 0,013251 | 0,441416 Intron Retention    | 0,47 |
| TC0100003604.mm.1 | 2,98 Rgs7                   | JUC0100016846.mm.1 | -3,53  | 0,016396 | 0,458812                     |      |
| TC0500003012.mm.1 | 1,14 Miat                   | PSR0500026693.mm.1 | 6,69   | 0,049282 | 0,562691 Alternative 3' Acce | 0,48 |
| TC0300001280.mm.1 | -1,18 LOC100862268; Gm16958 | JUC0300005444.mm.1 | 6,69   | 0,016402 | 0,458894                     |      |
| TC1000000224.mm.1 | 4,44 Epb4.1l2               | JUC1000000871.mm.1 | 6,68   | 0,002856 | 0,352207                     |      |
| TC1000000224.mm.1 | 4,44 Epb4.1l2               | JUC1000000860.mm.1 | 5,3    | 0,000073 | 0,251428                     |      |
| TC1000000224.mm.1 | 4,44 Epb4.1l2               | PSR1000001627.mm.1 | -2,1   | 0,00538  | 0,378761 Cassette Exon       | 0,24 |
| TC1000000224.mm.1 | 4,44 Epb4.1l2               | PSR1000001603.mm.1 | -2,15  | 0,033574 | 0,523178 Cassette Exon       | 0,15 |
| TC1000000224.mm.1 | 4,44 Epb4.1l2               | PSR1000001624.mm.1 | -2,37  | 0,002322 | 0,3467 Cassette Exon         | 0,29 |
| TC1000000224.mm.1 | 4,44 Epb4.1l2               | PSR1000001614.mm.1 | -2,38  | 0,032703 | 0,520439 Cassette Exon       | 0,2  |
| TC1000000224.mm.1 | 4,44 Epb4.1l2               | PSR1000001598.mm.1 | -2,62  | 0,008713 | 0,409266 Cassette Exon       | 0,09 |
| TC1000000224.mm.1 | 4,44 Epb4.1l2               | JUC1000000870.mm.1 | -2,95  | 0,001482 | 0,329081                     |      |
| TC1000000224.mm.1 | 4,44 Epb4.1l2               | JUC1000000850.mm.1 | -3,15  | 0,036035 | 0,529611                     |      |
| TC1000000224.mm.1 | 4,44 Epb4.1l2               | JUC1000000878.mm.1 | -3,52  | 0,044133 | 0,551024                     |      |
| TC1000000224.mm.1 | 4,44 Epb4.1l2               | PSR1000001597.mm.1 | -3,57  | 0,017764 | 0,465437 Cassette Exon       | 0,33 |
| TC1000000224.mm.1 | 4,44 Epb4.1l2               | JUC1000000875.mm.1 | -3,57  | 0,048021 | 0,559606                     |      |
| TC1000000224.mm.1 | 4,44 Epb4.1l2               | PSR1000001612.mm.1 | -3,67  | 0,030639 | 0,513746 Cassette Exon       | 0,34 |
| TC1000000224.mm.1 | 4,44 Epb4.1l2               | JUC1000000865.mm.1 | -3,67  | 0,001681 | 0,335182                     |      |
| TC1000000224.mm.1 | 4,44 Epb4.1l2               | JUC1000000868.mm.1 | -3,9   | 0,021431 | 0,482126                     |      |
| TC1000000224.mm.1 | 4,44 Epb4.1l2               | JUC1000000864.mm.1 | -5,16  | 0,002288 | 0,34605                      |      |
| TC1000000224.mm.1 | 4,44 Epb4.1l2               | JUC1000000879.mm.1 | -5,58  | 0,002886 | 0,352207                     |      |
| TC1000000224.mm.1 | 4,44 Epb4.1l2               | PSR1000001623.mm.1 | -5,83  | 0,00381  | 0,358103 Alternative 5' Donc | 0,49 |
| TC1000000224.mm.1 | 4,44 Epb4.1l2               | JUC1000000863.mm.1 | -6,9   | 0,01088  | 0,424197                     |      |
| TC1000000224.mm.1 | 4,44 Epb4.1l2               | JUC1000000861.mm.1 | -7,64  | 0,032287 | 0,519116                     |      |
| TC1000000224.mm.1 | 4,44 Epb4.1l2               | JUC1000000862.mm.1 | -10,83 | 0,009585 | 0,417183                     |      |
| TC0500002559.mm.1 | 2,14 Gabra2                 | PSR0500022648.mm.1 | 6,67   | 0,003478 | 0,355638 Alternative 3' Acce | 0,42 |
| TC0500002559.mm.1 | 2,14 Gabra2                 | PSR0500022660.mm.1 | -2,6   | 0,002044 | 0,341377 Cassette Exon       | 0,13 |
| TC0500002559.mm.1 | 2,14 Gabra2                 | JUC0500012304.mm.1 | -2,66  | 0,016055 | 0,457283                     |      |
| TC1400001067.mm.1 | -1,08 Nufip1                | JUC1400004584.mm.1 | 6,65   | 0,007201 | 0,398011                     |      |
| TC0900002401.mm.1 | -1,12 Neo1                  | JUC0900011383.mm.1 | 6,63   | 0,023527 | 0,490947                     |      |
| TC0900002401.mm.1 | -1,12 Neo1                  | PSR0900020177.mm.1 | 3,21   | 0,017705 | 0,465159 Cassette Exon       | 0,36 |
| TC0900002401.mm.1 | -1,12 Neo1                  | JUC0900011393.mm.1 | 2,11   | 0,021558 | 0,483034                     |      |
| TC0900001800.mm.1 | -1,82 Naalad2               | JUC0900008516.mm.1 | 6,63   | 0,011874 | 0,431125                     |      |
| TC0900001800.mm.1 | -1,82 Naalad2               | PSR0900015164.mm.1 | 2,02   | 0,006915 | 0,394944 Alternative 5' Donc | 0,06 |
| TC0100000356.mm.1 | 1,25 Dnah7c                 | JUC0100001628.mm.1 | 6,6    | 0,009772 | 0,417839                     |      |
| TC0100000356.mm.1 | 1,25 Dnah7c                 | JUC0100001583.mm.1 | 5,33   | 0,017396 | 0,463736                     |      |
| TC0100000356.mm.1 | 1,25 Dnah7c                 | JUC0100001624.mm.1 | 4,55   | 0,018587 | 0,469618                     |      |
| TC0100000356.mm.1 | 1,25 Dnah7c                 | JUC0100001584.mm.1 | 3,79   | 0,036931 | 0,532349                     |      |
| TC0100000356.mm.1 | 1,25 Dnah7c                 | JUC0100001619.mm.1 | 2,99   | 0,042371 | 0,5475                       |      |
| TC0100000356.mm.1 | 1,25 Dnah7c                 | PSR0100002757.mm.1 | 2,77   | 0,047341 | 0,558291 Cassette Exon       | 0,23 |
| TC0100000356.mm.1 | 1,25 Dnah7c                 | JUC0100001631.mm.1 | 2,74   | 0,047169 | 0,558007                     |      |
| TC0100000356.mm.1 | 1,25 Dnah7c                 | JUC0100001618.mm.1 | 2,65   | 0,020505 | 0,478228                     |      |
| TC0100000356.mm.1 | 1,25 Dnah7c                 | JUC0100001606.mm.1 | 2,61   | 0,003064 | 0,353892                     |      |
| TC0100000356.mm.1 | 1,25 Dnah7c                 | PSR0100002750.mm.1 | 2,5    | 0,014771 | 0,450801 Cassette Exon       | 0,18 |
| TC0100000356.mm.1 | 1,25 Dnah7c                 | JUC0100001597.mm.1 | 2,42   | 0,029252 | 0,509776                     |      |
| TC0100000356.mm.1 | 1,25 Dnah7c                 | PSR0100002782.mm.1 | 2,41   | 0,027184 | 0,503342 Cassette Exon       | 0,23 |
| TC0100000356.mm.1 | 1,25 Dnah7c                 | JUC0100001607.mm.1 | 2,28   | 0,040355 | 0,541949                     |      |
| TC0100000356.mm.1 | 1,25 Dnah7c                 | JUC0100001603.mm.1 | 2,16   | 0,049165 | 0,562368                     |      |

|                   |              |                    |       |          |                              |      |
|-------------------|--------------|--------------------|-------|----------|------------------------------|------|
| TC0100000356.mm.1 | 1,25 Dnah7c  | PSR0100002741.mm.1 | 2,14  | 0,0178   | 0,465641 Cassette Exon       | 0,11 |
| TC0100000356.mm.1 | 1,25 Dnah7c  | JUC0100001573.mm.1 | -2,13 | 0,005539 | 0,380603                     |      |
| TC1500002350.mm.1 | -1,14 Cpt1b  | JUC1500009414.mm.1 | 6,59  | 0,02087  | 0,479521                     |      |
| TC1100000093.mm.1 | -1,13 Ogdh   | JUC1100000517.mm.1 | 6,58  | 0,003033 | 0,353543                     |      |
| TC1100000093.mm.1 | -1,13 Ogdh   | JUC1100000515.mm.1 | 5,03  | 0,012367 | 0,43488                      |      |
| TC1100000093.mm.1 | -1,13 Ogdh   | PSR1100000996.mm.1 | -2,04 | 0,038806 | 0,537594 Alternative 5' Donc | 0,15 |
| TC1000000365.mm.1 | -1 Mical1    | JUC1000001377.mm.1 | 6,58  | 0,026095 | 0,499793                     |      |
| TC1100003044.mm.1 | -1,08 Dnah2  | JUC1100014552.mm.1 | 6,57  | 0,019566 | 0,474636                     |      |
| TC1100003044.mm.1 | -1,08 Dnah2  | JUC1100014595.mm.1 | 2,42  | 0,023357 | 0,490143                     |      |
| TC0100002067.mm.1 | 1,08 Smap1   | JUC0100009559.mm.1 | 6,56  | 0,046413 | 0,556519                     |      |
| TC1100004102.mm.1 | 1,43 Wbp2    | JUC1100020266.mm.1 | 6,55  | 0,007288 | 0,398787                     |      |
| TC0600001352.mm.1 | 1,83 Cecr2   | PSR0600010782.mm.1 | 6,52  | 0,000298 | 0,288663 Alternative 5' Donc | 0,56 |
| TC0600001352.mm.1 | 1,83 Cecr2   | JUC0600005617.mm.1 | 3,99  | 0,023099 | 0,489699                     |      |
| TC0600001352.mm.1 | 1,83 Cecr2   | PSR0600010783.mm.1 | 2,71  | 0,007335 | 0,399002 Cassette Exon       | 0,25 |
| TC0600001352.mm.1 | 1,83 Cecr2   | PSR0600010768.mm.1 | 2,62  | 0,000972 | 0,314287 Cassette Exon       | 0,21 |
| TC0600001352.mm.1 | 1,83 Cecr2   | PSR0600010769.mm.1 | 2,34  | 0,023801 | 0,491893 Alternative 3' Acce | 0,21 |
| TC0600001352.mm.1 | 1,83 Cecr2   | JUC0600005610.mm.1 | 2,25  | 0,00052  | 0,303623                     |      |
| TC0600001352.mm.1 | 1,83 Cecr2   | JUC0600005611.mm.1 | 2,22  | 0,003703 | 0,357266                     |      |
| TC0600001352.mm.1 | 1,83 Cecr2   | PSR0600010779.mm.1 | 2,19  | 0,04446  | 0,551693 Cassette Exon       | 0,13 |
| TC0600001352.mm.1 | 1,83 Cecr2   | PSR0600010790.mm.1 | 2,07  | 0,036094 | 0,529729 Cassette Exon       | 0,1  |
| TC0600001352.mm.1 | 1,83 Cecr2   | PSR0600010762.mm.1 | -2,02 | 0,009936 | 0,41841 Cassette Exon        | 0,08 |
| TC0600001352.mm.1 | 1,83 Cecr2   | JUC0600005622.mm.1 | -3,84 | 0,000778 | 0,309451                     |      |
| TC0600001352.mm.1 | 1,83 Cecr2   | JUC0600005616.mm.1 | -6,98 | 0,000577 | 0,304044                     |      |
| TC1000001066.mm.1 | -2,2 Igf1    | PSR1000008067.mm.1 | 6,52  | 0,001712 | 0,335996 Cassette Exon       | 0,27 |
| TC1000001066.mm.1 | -2,2 Igf1    | PSR1000008079.mm.1 | 2,91  | 0,01688  | 0,460797 Alternative 5' Donc | 0,3  |
| TC1000001066.mm.1 | -2,2 Igf1    | PSR1000008074.mm.1 | 2,41  | 0,001785 | 0,336311 Alternative 5' Donc | 0,19 |
| TC1000001066.mm.1 | -2,2 Igf1    | PSR1000008070.mm.1 | 2,28  | 0,014102 | 0,447108 Alternative 5' Donc | 0,13 |
| TC0700001382.mm.1 | 1,88 Map6    | JUC0700006057.mm.1 | 6,52  | 0,008038 | 0,40434                      |      |
| TC0700001382.mm.1 | 1,88 Map6    | PSR0700011706.mm.1 | -2,14 | 0,005375 | 0,378747 Alternative 3' Acce | 0,13 |
| TC0700001382.mm.1 | 1,88 Map6    | PSR0700011711.mm.1 | -2,14 | 0,004724 | 0,370888 Alternative 5' Donc | 0,13 |
| TC1000003066.mm.1 | 1,02 Mon2    | JUC1000012561.mm.1 | 6,5   | 0,012627 | 0,436053                     |      |
| TC1000003066.mm.1 | 1,02 Mon2    | JUC1000012560.mm.1 | 3,68  | 0,01239  | 0,434939                     |      |
| TC1700001661.mm.1 | 2,51 Cacna1h | JUC1700008246.mm.1 | 6,49  | 0,013994 | 0,446353                     |      |
| TC1700001661.mm.1 | 2,51 Cacna1h | JUC1700008232.mm.1 | 4,07  | 0,013978 | 0,446242                     |      |
| TC1700001661.mm.1 | 2,51 Cacna1h | JUC1700008252.mm.1 | 3,18  | 0,003948 | 0,359922                     |      |
| TC1700001661.mm.1 | 2,51 Cacna1h | JUC1700008251.mm.1 | 3,06  | 0,002041 | 0,341377                     |      |
| TC1700001661.mm.1 | 2,51 Cacna1h | PSR1700015128.mm.1 | 2,48  | 0,012072 | 0,43255 Cassette Exon        | 0,09 |
| TC1700001661.mm.1 | 2,51 Cacna1h | PSR1700015154.mm.1 | 2,41  | 0,022137 | 0,48556 Cassette Exon        | 0,26 |
| TC1700001661.mm.1 | 2,51 Cacna1h | JUC1700008224.mm.1 | 2,41  | 0,010044 | 0,418873                     |      |
| TC1700001661.mm.1 | 2,51 Cacna1h | JUC1700008248.mm.1 | 2,37  | 0,010443 | 0,421595                     |      |
| TC1700001661.mm.1 | 2,51 Cacna1h | PSR1700015155.mm.1 | 2,36  | 0,040152 | 0,541609 Cassette Exon       | 0,26 |
| TC1700001661.mm.1 | 2,51 Cacna1h | JUC1700008241.mm.1 | 2,29  | 0,031569 | 0,51716                      |      |
| TC1700001661.mm.1 | 2,51 Cacna1h | JUC1700008243.mm.1 | 2,18  | 0,036087 | 0,529712                     |      |
| TC1700001661.mm.1 | 2,51 Cacna1h | PSR1700015141.mm.1 | 2,03  | 0,003165 | 0,353901 Cassette Exon       | 0,15 |
| TC1700001661.mm.1 | 2,51 Cacna1h | PSR1700015135.mm.1 | -2,03 | 0,000991 | 0,316265 Cassette Exon       | 0,24 |
| TC1700001661.mm.1 | 2,51 Cacna1h | PSR1700015144.mm.1 | -2,17 | 0,008874 | 0,410574 Cassette Exon       | 0,09 |
| TC1700001661.mm.1 | 2,51 Cacna1h | PSR1700015157.mm.1 | -2,2  | 0,034025 | 0,524517                     |      |
| TC1700001661.mm.1 | 2,51 Cacna1h | JUC1700008235.mm.1 | -2,24 | 0,046836 | 0,557144                     |      |

|                   |       |         |                    |       |          |          |                     |      |
|-------------------|-------|---------|--------------------|-------|----------|----------|---------------------|------|
| TC1700001661.mm.1 | 2,51  | Cacna1h | PSR1700015148.mm.1 | -2,26 | 0,008092 | 0,405014 | Alternative 3' Acce | 0,17 |
| TC1700001661.mm.1 | 2,51  | Cacna1h | JUC1700008229.mm.1 | -2,34 | 0,022379 | 0,486433 |                     |      |
| TC1700001661.mm.1 | 2,51  | Cacna1h | PSR1700015138.mm.1 | -2,46 | 0,005578 | 0,381035 | Cassette Exon       | 0,17 |
| TC1700001661.mm.1 | 2,51  | Cacna1h | PSR1700015124.mm.1 | -2,52 | 0,043146 | 0,548676 | Cassette Exon       | 0,14 |
| TC1700001661.mm.1 | 2,51  | Cacna1h | PSR1700015112.mm.1 | -2,6  | 0,00481  | 0,371408 | Cassette Exon       | 0,15 |
| TC1700001661.mm.1 | 2,51  | Cacna1h | PSR1700015139.mm.1 | -2,65 | 0,000066 | 0,250119 | Cassette Exon       | 0,11 |
| TC1700001661.mm.1 | 2,51  | Cacna1h | JUC1700008254.mm.1 | -2,66 | 0,008159 | 0,40551  |                     |      |
| TC1700001661.mm.1 | 2,51  | Cacna1h | PSR1700015143.mm.1 | -2,77 | 0,004298 | 0,364027 | Alternative 3' Acce | 0,09 |
| TC1700001661.mm.1 | 2,51  | Cacna1h | JUC1700008234.mm.1 | -2,92 | 0,010254 | 0,420147 |                     |      |
| TC1700001661.mm.1 | 2,51  | Cacna1h | PSR1700015159.mm.1 | -2,96 | 0,004693 | 0,370481 |                     |      |
| TC1700001661.mm.1 | 2,51  | Cacna1h | PSR1700015160.mm.1 | -2,99 | 0,001797 | 0,336311 | Cassette Exon       | 0,18 |
| TC1700001661.mm.1 | 2,51  | Cacna1h | PSR1700015158.mm.1 | -3,13 | 0,002279 | 0,345991 | Cassette Exon       | 0,1  |
| TC1700001661.mm.1 | 2,51  | Cacna1h | PSR1700015122.mm.1 | -3,33 | 0,00035  | 0,290082 | Alternative 5' Donc | 0,38 |
| TC1700001661.mm.1 | 2,51  | Cacna1h | JUC1700008230.mm.1 | -3,59 | 0,005486 | 0,379939 |                     |      |
| TC1400000783.mm.1 | -1,59 | Fitm1   | JUC1400003333.mm.1 | 6,48  | 0,01947  | 0,474209 |                     |      |
| TC1300002041.mm.1 | 3,09  | Sncb    | JUC1300006599.mm.1 | 6,47  | 0,000468 | 0,298999 |                     |      |
| TC1300002041.mm.1 | 3,09  | Sncb    | PSR1300012807.mm.1 | 3,94  | 0,002011 | 0,341091 | Cassette Exon       | 0,39 |
| TC1300002041.mm.1 | 3,09  | Sncb    | PSR1300012806.mm.1 | 2,04  | 0,008531 | 0,407721 | Cassette Exon       | 0,11 |
| TC1300002041.mm.1 | 3,09  | Sncb    | PSR1300012804.mm.1 | -2,22 | 0,000932 | 0,313363 | Cassette Exon       | 0,09 |
| TC1300002041.mm.1 | 3,09  | Sncb    | PSR1300012813.mm.1 | -2,34 | 0,020592 | 0,478531 | Cassette Exon       | 0,16 |
| TC1300002041.mm.1 | 3,09  | Sncb    | PSR1300012812.mm.1 | -2,98 | 0,003358 | 0,354243 | Cassette Exon       | 0,18 |
| TC1300002041.mm.1 | 3,09  | Sncb    | PSR1300012814.mm.1 | -3,01 | 0,011935 | 0,431703 | Cassette Exon       | 0,16 |
| TC1300002041.mm.1 | 3,09  | Sncb    | PSR1300012808.mm.1 | -3,02 | 0,002894 | 0,352207 | Alternative 5' Donc | 0,32 |
| TC1300002041.mm.1 | 3,09  | Sncb    | PSR1300012811.mm.1 | -3,39 | 0,007047 | 0,396259 | Cassette Exon       | 0,29 |
| TC0200005430.mm.1 | 3,23  | Kcnq2   | JUC0200023843.mm.1 | 6,45  | 0,003815 | 0,35811  |                     |      |
| TC0200005430.mm.1 | 3,23  | Kcnq2   | PSR0200046279.mm.1 | 2,62  | 0,003726 | 0,357586 | Cassette Exon       | 0,24 |
| TC0200005430.mm.1 | 3,23  | Kcnq2   | PSR0200046261.mm.1 | -2,22 | 0,011021 | 0,425624 | Cassette Exon       | 0,38 |
| TC0200005430.mm.1 | 3,23  | Kcnq2   | PSR0200046268.mm.1 | -2,25 | 0,009506 | 0,416602 | Cassette Exon       | 0,41 |
| TC0200005430.mm.1 | 3,23  | Kcnq2   | PSR0200046246.mm.1 | -2,27 | 0,000031 | 0,235203 | Alternative 5' Donc | 0,04 |
| TC0200005430.mm.1 | 3,23  | Kcnq2   | PSR0200046284.mm.1 | -2,34 | 0,001434 | 0,327493 | Alternative 5' Donc | 0,37 |
| TC0200005430.mm.1 | 3,23  | Kcnq2   | PSR0200046240.mm.1 | -2,39 | 0,020403 | 0,477881 | Alternative 3' Acce | 0,21 |
| TC0200005430.mm.1 | 3,23  | Kcnq2   | PSR0200046239.mm.1 | -2,45 | 0,009142 | 0,413447 | Alternative 3' Acce | 0,21 |
| TC0200005430.mm.1 | 3,23  | Kcnq2   | PSR0200046238.mm.1 | -2,58 | 0,007578 | 0,40171  | Cassette Exon       | 0,28 |
| TC0200005430.mm.1 | 3,23  | Kcnq2   | PSR0200046265.mm.1 | -2,59 | 0,006448 | 0,390283 | Cassette Exon       | 0,28 |
| TC0200005430.mm.1 | 3,23  | Kcnq2   | JUC0200023853.mm.1 | -2,66 | 0,016216 | 0,458312 |                     |      |
| TC0200005430.mm.1 | 3,23  | Kcnq2   | JUC0200023836.mm.1 | -2,78 | 0,033123 | 0,52188  |                     |      |
| TC0200005430.mm.1 | 3,23  | Kcnq2   | PSR0200046242.mm.1 | -2,8  | 0,001748 | 0,335996 | Alternative 3' Acce | 0,09 |
| TC0200005430.mm.1 | 3,23  | Kcnq2   | PSR0200046267.mm.1 | -3,01 | 0,006126 | 0,387351 | Cassette Exon       | 0,29 |
| TC0200005430.mm.1 | 3,23  | Kcnq2   | PSR0200046277.mm.1 | -3,08 | 0,000392 | 0,296934 | Intron Retention    | 0,52 |
| TC0200005430.mm.1 | 3,23  | Kcnq2   | PSR0200046253.mm.1 | -3,42 | 0,002549 | 0,349501 | Alternative 3' Acce | 0,49 |
| TC0200005430.mm.1 | 3,23  | Kcnq2   | PSR0200046292.mm.1 | -3,42 | 0,018823 | 0,470836 | Cassette Exon       | 0,23 |
| TC0200005430.mm.1 | 3,23  | Kcnq2   | PSR0200046254.mm.1 | -3,44 | 0,006267 | 0,388719 | Alternative 3' Acce | 0,51 |
| TC0200005430.mm.1 | 3,23  | Kcnq2   | PSR0200046286.mm.1 | -3,46 | 0,01337  | 0,442252 | Cassette Exon       | 0,23 |
| TC0200005430.mm.1 | 3,23  | Kcnq2   | PSR0200046250.mm.1 | -3,52 | 0,008461 | 0,406624 | Cassette Exon       | 0,29 |
| TC0200005430.mm.1 | 3,23  | Kcnq2   | PSR0200046283.mm.1 | -3,56 | 0,031481 | 0,516965 | Alternative 5' Donc | 0,37 |
| TC0200005430.mm.1 | 3,23  | Kcnq2   | PSR0200046285.mm.1 | -3,67 | 0,002494 | 0,349135 | Cassette Exon       | 0,25 |
| TC0200005430.mm.1 | 3,23  | Kcnq2   | PSR0200046266.mm.1 | -3,75 | 0,001958 | 0,340561 | Cassette Exon       | 0,28 |
| TC0200005430.mm.1 | 3,23  | Kcnq2   | PSR0200046249.mm.1 | -3,81 | 0,001043 | 0,316361 | Cassette Exon       | 0,38 |

|                   |                            |                    |       |          |          |                     |      |
|-------------------|----------------------------|--------------------|-------|----------|----------|---------------------|------|
| TC0200005430.mm.1 | 3,23 Kcnq2                 | PSR0200046243.mm.1 | -3,81 | 0,001388 | 0,325997 | Alternative 3' Acce | 0,09 |
| TC0200005430.mm.1 | 3,23 Kcnq2                 | PSR0200046248.mm.1 | -3,85 | 0,004648 | 0,370181 | Alternative 5' Donc | 0,04 |
| TC0200005430.mm.1 | 3,23 Kcnq2                 | JUC0200023833.mm.1 | -3,92 | 0,008628 | 0,408463 |                     |      |
| TC0200005430.mm.1 | 3,23 Kcnq2                 | PSR0200046282.mm.1 | -4,06 | 0,005534 | 0,380557 | Intron Retention    | 0,43 |
| TC0200005430.mm.1 | 3,23 Kcnq2                 | JUC0200023854.mm.1 | -4,11 | 0,007987 | 0,403853 |                     |      |
| TC0200005430.mm.1 | 3,23 Kcnq2                 | JUC0200023856.mm.1 | -4,18 | 0,014697 | 0,450327 |                     |      |
| TC0200005430.mm.1 | 3,23 Kcnq2                 | PSR0200046263.mm.1 | -4,21 | 0,004149 | 0,3623   | Cassette Exon       | 0,1  |
| TC0200005430.mm.1 | 3,23 Kcnq2                 | PSR0200046272.mm.1 | -4,41 | 0,000637 | 0,304044 | Alternative 3' Acce | 0,34 |
| TC0200005430.mm.1 | 3,23 Kcnq2                 | JUC0200023832.mm.1 | -4,46 | 0,011228 | 0,426718 |                     |      |
| TC0200005430.mm.1 | 3,23 Kcnq2                 | PSR0200046264.mm.1 | -4,51 | 0,004433 | 0,366934 | Cassette Exon       | 0,38 |
| TC0200005430.mm.1 | 3,23 Kcnq2                 | JUC0200023849.mm.1 | -4,56 | 0,000923 | 0,313363 |                     |      |
| TC0200005430.mm.1 | 3,23 Kcnq2                 | JUC0200023837.mm.1 | -4,72 | 0,005632 | 0,381532 |                     |      |
| TC0200005430.mm.1 | 3,23 Kcnq2                 | PSR0200046256.mm.1 | -4,8  | 0,002234 | 0,34578  | Alternative 3' Acce | 0,54 |
| TC0200005430.mm.1 | 3,23 Kcnq2                 | PSR0200046269.mm.1 | -4,87 | 0,005178 | 0,376851 | Cassette Exon       | 0,41 |
| TC0200005430.mm.1 | 3,23 Kcnq2                 | JUC0200023839.mm.1 | -4,88 | 0,000179 | 0,283791 |                     |      |
| TC0200005430.mm.1 | 3,23 Kcnq2                 | PSR0200046255.mm.1 | -4,99 | 0,000529 | 0,304044 | Alternative 3' Acce | 0,54 |
| TC0200005430.mm.1 | 3,23 Kcnq2                 | JUC0200023846.mm.1 | -5,15 | 0,007766 | 0,402774 |                     |      |
| TC0200005430.mm.1 | 3,23 Kcnq2                 | JUC0200023855.mm.1 | -5,3  | 0,007655 | 0,402288 |                     |      |
| TC0200005430.mm.1 | 3,23 Kcnq2                 | PSR0200046273.mm.1 | -5,82 | 0,003369 | 0,354278 | Intron Retention    | 0,38 |
| TC1100003297.mm.1 | 1,73 Sarm1                 | PSR1100030394.mm.1 | 6,45  | 0,016136 | 0,457846 | Cassette Exon       | 0,38 |
| TC1100003297.mm.1 | 1,73 Sarm1                 | JUC1100015905.mm.1 | 6,42  | 0,020435 | 0,478018 |                     |      |
| TC1100003297.mm.1 | 1,73 Sarm1                 | JUC1100015910.mm.1 | 4,4   | 0,035525 | 0,528764 |                     |      |
| TC1100003297.mm.1 | 1,73 Sarm1                 | JUC1100015904.mm.1 | 4,35  | 0,007073 | 0,39672  |                     |      |
| TC1100003297.mm.1 | 1,73 Sarm1                 | PSR1100030395.mm.1 | 3,94  | 0,02538  | 0,497403 | Cassette Exon       | 0,38 |
| TC1100003297.mm.1 | 1,73 Sarm1                 | PSR1100030405.mm.1 | 3,19  | 0,017312 | 0,463282 | Cassette Exon       | 0,13 |
| TC1100003297.mm.1 | 1,73 Sarm1                 | JUC1100015912.mm.1 | 3,14  | 0,011832 | 0,43053  |                     |      |
| TC1100003297.mm.1 | 1,73 Sarm1                 | PSR1100030396.mm.1 | 2,86  | 0,031466 | 0,516906 | Cassette Exon       | 0,38 |
| TC1100003297.mm.1 | 1,73 Sarm1                 | JUC1100015909.mm.1 | -2,6  | 0,009838 | 0,417839 |                     |      |
| TC0200000004.mm.1 | -1,1 Nmt2                  | JUC0200000015.mm.1 | 6,45  | 0,027377 | 0,503961 |                     |      |
| TC1200001843.mm.1 | 2,99 Mdga2                 | JUC1200006944.mm.1 | 6,44  | 0,001369 | 0,32572  |                     |      |
| TC1200001843.mm.1 | 2,99 Mdga2                 | PSR1200012569.mm.1 | 4,21  | 0,000274 | 0,28803  | Cassette Exon       | 0,27 |
| TC1200001843.mm.1 | 2,99 Mdga2                 | PSR1200012559.mm.1 | 3,82  | 0,000428 | 0,297771 | Cassette Exon       | 0,36 |
| TC1200001843.mm.1 | 2,99 Mdga2                 | JUC1200006945.mm.1 | 3,11  | 0,019046 | 0,471941 |                     |      |
| TC1200001843.mm.1 | 2,99 Mdga2                 | PSR1200012561.mm.1 | 2,46  | 0,000419 | 0,297771 | Cassette Exon       | 0,1  |
| TC1200001843.mm.1 | 2,99 Mdga2                 | PSR1200012558.mm.1 | 2,33  | 0,00309  | 0,353892 | Cassette Exon       | 0,35 |
| TC1200001843.mm.1 | 2,99 Mdga2                 | PSR1200012563.mm.1 | 2,22  | 0,009241 | 0,414373 | Cassette Exon       | 0,03 |
| TC1200001843.mm.1 | 2,99 Mdga2                 | PSR1200012553.mm.1 | -2,9  | 0,011295 | 0,427117 | Alternative 3' Acce | 0,3  |
| TC1200001843.mm.1 | 2,99 Mdga2                 | PSR1200012582.mm.1 | -3,05 | 0,024287 | 0,49362  | Alternative 5' Donc | 0,23 |
| TC1200001843.mm.1 | 2,99 Mdga2                 | JUC1200006950.mm.1 | -3,15 | 0,022138 | 0,48556  |                     |      |
| TC1200001843.mm.1 | 2,99 Mdga2                 | JUC1200006957.mm.1 | -4,27 | 0,040658 | 0,542675 |                     |      |
| TC0900001114.mm.1 | 1,61 Dopey1                | JUC0900004749.mm.1 | 6,43  | 0,004839 | 0,371624 |                     |      |
| TC0900001114.mm.1 | 1,61 Dopey1                | JUC0900004750.mm.1 | 3,39  | 0,044279 | 0,551322 |                     |      |
| TC0900001114.mm.1 | 1,61 Dopey1                | JUC0900004735.mm.1 | 3,28  | 0,011233 | 0,426718 |                     |      |
| TC0900001114.mm.1 | 1,61 Dopey1                | PSR0900008744.mm.1 | -2,64 | 0,046016 | 0,555624 | Alternative 5' Donc | 0,27 |
| TC0900001114.mm.1 | 1,61 Dopey1                | JUC0900004773.mm.1 | -2,72 | 0,003088 | 0,353892 |                     |      |
| TC0700003126.mm.1 | 1,95 C230091D08Rik; Gm2496 | JUC0700015063.mm.1 | 6,42  | 0,028029 | 0,505851 |                     |      |
| TC0700003126.mm.1 | 1,95 C230091D08Rik; Gm2496 | PSR0700028291.mm.1 | 5,93  | 0,015035 | 0,452111 | Cassette Exon       | 0,29 |
| TC0700003126.mm.1 | 1,95 C230091D08Rik; Gm2496 | PSR0700028274.mm.1 | 3,37  | 0,000811 | 0,311886 | Cassette Exon       | 0,08 |

|                   |       |                       |                    |       |          |          |                     |      |
|-------------------|-------|-----------------------|--------------------|-------|----------|----------|---------------------|------|
| TC0700003126.mm.1 | 1,95  | C230091D08Rik; Gm2496 | PSR0700028288.mm.1 | 2,06  | 0,008057 | 0,40448  | Alternative 5' Donc | 0,15 |
| TC0700003126.mm.1 | 1,95  | C230091D08Rik; Gm2496 | PSR0700028289.mm.1 | -2,02 | 0,007779 | 0,402902 | Alternative 5' Donc | 0,18 |
| TC0700003126.mm.1 | 1,95  | C230091D08Rik; Gm2496 | PSR0700028280.mm.1 | -2,02 | 0,014653 | 0,450098 | Cassette Exon       | 0,11 |
| TC0700003126.mm.1 | 1,95  | C230091D08Rik; Gm2496 | JUC0700015068.mm.1 | -2,1  | 0,012739 | 0,436731 |                     |      |
| TC0700003126.mm.1 | 1,95  | C230091D08Rik; Gm2496 | JUC0700015065.mm.1 | -3,43 | 0,000835 | 0,311886 |                     |      |
| TC0X00001067.mm.1 | -1,27 | Atp7a                 | JUC0X00003477.mm.1 | 6,4   | 0,005328 | 0,378059 |                     |      |
| TC0X00001067.mm.1 | -1,27 | Atp7a                 | JUC0X00003468.mm.1 | 2,12  | 0,047297 | 0,558249 |                     |      |
| TC1800000443.mm.1 | 1,23  | Stk32a                | JUC1800001804.mm.1 | 6,39  | 0,001584 | 0,331726 |                     |      |
| TC1800000443.mm.1 | 1,23  | Stk32a                | JUC1800001805.mm.1 | 3,5   | 0,003214 | 0,354243 |                     |      |
| TC0400003483.mm.1 | 1,28  | D830031N03Rik; Macf1  | JUC0400014782.mm.1 | 6,38  | 0,036321 | 0,530547 |                     |      |
| TC0400003483.mm.1 | 1,28  | D830031N03Rik; Macf1  | JUC0400014752.mm.1 | 5,98  | 0,001851 | 0,337414 |                     |      |
| TC0400003483.mm.1 | 1,28  | D830031N03Rik; Macf1  | JUC0400014722.mm.1 | 4,83  | 0,004185 | 0,362773 |                     |      |
| TC0400003483.mm.1 | 1,28  | D830031N03Rik; Macf1  | JUC0400014745.mm.1 | 2,28  | 0,011019 | 0,425624 |                     |      |
| TC0400003483.mm.1 | 1,28  | D830031N03Rik; Macf1  | JUC0400014769.mm.1 | 2,18  | 0,025444 | 0,497549 |                     |      |
| TC0400003483.mm.1 | 1,28  | D830031N03Rik; Macf1  | JUC0400014826.mm.1 | -2,65 | 0,028952 | 0,508766 |                     |      |
| TC1000002418.mm.1 | -1,03 | Col18a1               | PSR1000017505.mm.1 | 6,36  | 0,031691 | 0,517443 | Cassette Exon       | 0,28 |
| TC1000002418.mm.1 | -1,03 | Col18a1               | JUC1000009623.mm.1 | 2,45  | 0,012186 | 0,433072 |                     |      |
| TC0300000871.mm.1 | 3,93  | Celf3                 | JUC0300003486.mm.1 | 6,34  | 0,001798 | 0,336311 |                     |      |
| TC0300000871.mm.1 | 3,93  | Celf3                 | PSR0300006680.mm.1 | 3,98  | 0,003571 | 0,356223 | Cassette Exon       | 0,21 |
| TC0300000871.mm.1 | 3,93  | Celf3                 | PSR0300006679.mm.1 | 3,1   | 0,007997 | 0,403853 | Cassette Exon       | 0,11 |
| TC0300000871.mm.1 | 3,93  | Celf3                 | PSR0300006668.mm.1 | 2,34  | 0,031206 | 0,515777 | Cassette Exon       | 0,04 |
| TC0300000871.mm.1 | 3,93  | Celf3                 | PSR0300006671.mm.1 | -2,05 | 0,003354 | 0,354243 | Cassette Exon       | 0,21 |
| TC0300000871.mm.1 | 3,93  | Celf3                 | PSR0300006659.mm.1 | -2,1  | 0,020507 | 0,478244 | Alternative 3' Acce | 0,22 |
| TC0300000871.mm.1 | 3,93  | Celf3                 | JUC0300003484.mm.1 | -2,12 | 0,025324 | 0,497278 |                     |      |
| TC0300000871.mm.1 | 3,93  | Celf3                 | PSR0300006665.mm.1 | -2,32 | 0,000744 | 0,307808 | Alternative 3' Acce | 0,2  |
| TC0300000871.mm.1 | 3,93  | Celf3                 | PSR0300006661.mm.1 | -3,22 | 0,002165 | 0,344238 | Alternative 3' Acce | 0,36 |
| TC0300000871.mm.1 | 3,93  | Celf3                 | JUC0300003479.mm.1 | -3,51 | 0,011825 | 0,430456 |                     |      |
| TC0300000871.mm.1 | 3,93  | Celf3                 | PSR0300006657.mm.1 | -3,68 | 0,012623 | 0,436032 | Alternative 3' Acce | 0,22 |
| TC0300000871.mm.1 | 3,93  | Celf3                 | PSR0300006674.mm.1 | -4,22 | 0,001568 | 0,331411 | Alternative 5' Donc | 0,22 |
| TC0300000871.mm.1 | 3,93  | Celf3                 | JUC0300003481.mm.1 | -5,72 | 0,01582  | 0,45594  |                     |      |
| TC0500001412.mm.1 | 1,76  | Wdr66                 | JUC0500006869.mm.1 | 6,33  | 0,002919 | 0,352289 |                     |      |
| TC0500001412.mm.1 | 1,76  | Wdr66                 | PSR0500012580.mm.1 | 3,04  | 0,034103 | 0,524833 | Alternative 3' Acce | 0,36 |
| TC0500001412.mm.1 | 1,76  | Wdr66                 | PSR0500012560.mm.1 | 2,85  | 0,048473 | 0,560864 | Cassette Exon       | 0,22 |
| TC0500001412.mm.1 | 1,76  | Wdr66                 | JUC0500006866.mm.1 | 2,78  | 0,031113 | 0,515372 |                     |      |
| TC0500001412.mm.1 | 1,76  | Wdr66                 | JUC0500006874.mm.1 | 2,32  | 0,006837 | 0,393893 |                     |      |
| TC0500001412.mm.1 | 1,76  | Wdr66                 | PSR0500012573.mm.1 | -2,38 | 0,003841 | 0,358714 | Alternative 5' Donc | 0,27 |
| TC0500001412.mm.1 | 1,76  | Wdr66                 | PSR0500012553.mm.1 | -2,5  | 0,013111 | 0,439759 | Alternative 3' Acce | 0,2  |
| TC0500001412.mm.1 | 1,76  | Wdr66                 | JUC0500006862.mm.1 | -3,08 | 0,022041 | 0,48529  |                     |      |
| TC1000001684.mm.1 | 1,26  | Syne1                 | JUC1000006657.mm.1 | 6,31  | 0,002961 | 0,352501 |                     |      |
| TC1000001684.mm.1 | 1,26  | Syne1                 | JUC1000006658.mm.1 | 3,77  | 0,008524 | 0,407684 |                     |      |
| TC1000001684.mm.1 | 1,26  | Syne1                 | JUC1000006650.mm.1 | 2,34  | 0,002971 | 0,352501 |                     |      |
| TC0200005400.mm.1 | 2,8   | Hrh3                  | PSR0200045911.mm.1 | 6,3   | 0,001165 | 0,318159 | Cassette Exon       | 0,28 |
| TC0200005400.mm.1 | 2,8   | Hrh3                  | PSR0200045908.mm.1 | -2,08 | 0,005551 | 0,380756 | Intron Retention    | 0,23 |
| TC0200005400.mm.1 | 2,8   | Hrh3                  | PSR0200045917.mm.1 | -2,08 | 0,01311  | 0,439759 | Alternative 5' Donc | 0,17 |
| TC0200005400.mm.1 | 2,8   | Hrh3                  | JUC0200023630.mm.1 | -2,16 | 0,006394 | 0,389654 |                     |      |
| TC0200005400.mm.1 | 2,8   | Hrh3                  | PSR0200045902.mm.1 | -2,19 | 0,000285 | 0,28803  | Alternative 3' Acce | 0,2  |
| TC0200005400.mm.1 | 2,8   | Hrh3                  | PSR0200045899.mm.1 | -2,67 | 0,004401 | 0,366415 | Alternative 3' Acce | 0,2  |
| TC0200005400.mm.1 | 2,8   | Hrh3                  | JUC0200023629.mm.1 | -3,44 | 0,006398 | 0,389654 |                     |      |

|                   |                              |                    |       |          |          |                     |      |
|-------------------|------------------------------|--------------------|-------|----------|----------|---------------------|------|
| TC0200005400.mm.1 | 2,8 Hrh3                     | PSR0200045898.mm.1 | -3,65 | 0,000482 | 0,298999 | Cassette Exon       | 0,3  |
| TC0900000607.mm.1 | -1,21 Alg9                   | JUC0900002281.mm.1 | 6,3   | 0,000538 | 0,304044 |                     |      |
| TC0900000607.mm.1 | -1,21 Alg9                   | JUC0900002280.mm.1 | 3,95  | 0,036903 | 0,532283 |                     |      |
| TC0900000607.mm.1 | -1,21 Alg9                   | JUC0900002260.mm.1 | 2,67  | 0,043449 | 0,549785 |                     |      |
| TC0900000607.mm.1 | -1,21 Alg9                   | JUC0900002282.mm.1 | 2,06  | 0,019924 | 0,475902 |                     |      |
| TC0900003023.mm.1 | 1,65 Dock3; Gm22238          | JUC0900014116.mm.1 | 6,26  | 0,024341 | 0,49362  |                     |      |
| TC0900003023.mm.1 | 1,65 Dock3; Gm22238          | PSR0900025239.mm.1 | 4,62  | 0,004068 | 0,361956 | Cassette Exon       | 0,28 |
| TC0900003023.mm.1 | 1,65 Dock3; Gm22238          | JUC0900014143.mm.1 | 4,27  | 0,002182 | 0,344453 |                     |      |
| TC0900003023.mm.1 | 1,65 Dock3; Gm22238          | JUC0900014104.mm.1 | 3,13  | 0,04947  | 0,563286 |                     |      |
| TC0900003023.mm.1 | 1,65 Dock3; Gm22238          | PSR0900025221.mm.1 | 3,06  | 0,00005  | 0,24627  | Cassette Exon       | 0,25 |
| TC0900003023.mm.1 | 1,65 Dock3; Gm22238          | PSR0900025240.mm.1 | 2,89  | 0,00336  | 0,354243 | Cassette Exon       | 0,24 |
| TC0900003023.mm.1 | 1,65 Dock3; Gm22238          | JUC0900014097.mm.1 | 2,63  | 0,001337 | 0,325349 |                     |      |
| TC0900003023.mm.1 | 1,65 Dock3; Gm22238          | JUC0900014102.mm.1 | 2,62  | 0,003108 | 0,353892 |                     |      |
| TC0900003023.mm.1 | 1,65 Dock3; Gm22238          | PSR0900025220.mm.1 | 2,52  | 0,031147 | 0,515641 | Cassette Exon       | 0,22 |
| TC0900003023.mm.1 | 1,65 Dock3; Gm22238          | JUC0900014135.mm.1 | 2,29  | 0,022257 | 0,485896 |                     |      |
| TC0900003023.mm.1 | 1,65 Dock3; Gm22238          | PSR0900025174.mm.1 | 2,09  | 0,00672  | 0,393343 | Cassette Exon       | 0,08 |
| TC0900003023.mm.1 | 1,65 Dock3; Gm22238          | JUC0900014147.mm.1 | 2,02  | 0,003397 | 0,354856 |                     |      |
| TC0900003023.mm.1 | 1,65 Dock3; Gm22238          | JUC0900014100.mm.1 | -2,1  | 0,035702 | 0,529027 |                     |      |
| TC0900003023.mm.1 | 1,65 Dock3; Gm22238          | PSR0900025230.mm.1 | -2,26 | 0,018462 | 0,468677 | Alternative 3' Acce | 0,1  |
| TC0900003023.mm.1 | 1,65 Dock3; Gm22238          | PSR0900025168.mm.1 | -2,39 | 0,004475 | 0,367858 | Cassette Exon       | 0,13 |
| TC0900003023.mm.1 | 1,65 Dock3; Gm22238          | JUC0900014153.mm.1 | -3,25 | 0,003671 | 0,357266 |                     |      |
| TC0900003023.mm.1 | 1,65 Dock3; Gm22238          | JUC0900014152.mm.1 | -3,89 | 0,001453 | 0,328414 |                     |      |
| TC0900003023.mm.1 | 1,65 Dock3; Gm22238          | PSR0900025235.mm.1 | -5,24 | 0,018673 | 0,470205 | Alternative 3' Acce | 0,59 |
| TC0700001117.mm.1 | -1,55                        | JUC0700005016.mm.1 | 6,23  | 0,02465  | 0,49468  |                     |      |
| TC0700004225.mm.1 | -1,01 Palb2                  | JUC0700018564.mm.1 | 6,21  | 0,000006 | 0,179072 |                     |      |
| TC0600001327.mm.1 | 1,33 Rasgef1a; Mir7044; mmu- | JUC0600005462.mm.1 | 6,2   | 0,001129 | 0,317328 |                     |      |
| TC0600001327.mm.1 | 1,33 Rasgef1a; Mir7044; mmu- | JUC0600005456.mm.1 | 4,37  | 0,004131 | 0,3623   |                     |      |
| TC0600001327.mm.1 | 1,33 Rasgef1a; Mir7044; mmu- | JUC0600005459.mm.1 | 4,04  | 0,036336 | 0,530547 |                     |      |
| TC0600001327.mm.1 | 1,33 Rasgef1a; Mir7044; mmu- | PSR0600010514.mm.1 | 2,78  | 0,002733 | 0,349612 | Cassette Exon       | 0,2  |
| TC0600001327.mm.1 | 1,33 Rasgef1a; Mir7044; mmu- | PSR0600010511.mm.1 | -4,06 | 0,035197 | 0,528243 | Alternative 3' Acce | 0,51 |
| TC0900001009.mm.1 | 1,38 Myo5a                   | JUC0900004267.mm.1 | 6,2   | 0,013259 | 0,441506 |                     |      |
| TC0900001009.mm.1 | 1,38 Myo5a                   | JUC0900004269.mm.1 | 5,78  | 0,015597 | 0,454998 |                     |      |
| TC0900001009.mm.1 | 1,38 Myo5a                   | JUC0900004268.mm.1 | 4,97  | 0,004264 | 0,363868 |                     |      |
| TC0900001009.mm.1 | 1,38 Myo5a                   | JUC0900004282.mm.1 | 3,55  | 0,020795 | 0,479488 |                     |      |
| TC0900001009.mm.1 | 1,38 Myo5a                   | JUC0900004281.mm.1 | 3,33  | 0,011587 | 0,429241 |                     |      |
| TC0900001009.mm.1 | 1,38 Myo5a                   | PSR0900007912.mm.1 | -2,04 | 0,031188 | 0,515739 | Cassette Exon       | 0,29 |
| TC0900001009.mm.1 | 1,38 Myo5a                   | PSR0900007907.mm.1 | -2,48 | 0,006985 | 0,395722 | Cassette Exon       | 0,46 |
| TC0900001009.mm.1 | 1,38 Myo5a                   | PSR0900007879.mm.1 | -2,57 | 0,01303  | 0,439367 | Alternative 3' Acce | 0,19 |
| TC0900001009.mm.1 | 1,38 Myo5a                   | JUC0900004254.mm.1 | -2,67 | 0,02576  | 0,498442 |                     |      |
| TC0900001009.mm.1 | 1,38 Myo5a                   | JUC0900004283.mm.1 | -2,9  | 0,02897  | 0,508766 |                     |      |
| TC0900001009.mm.1 | 1,38 Myo5a                   | JUC0900004271.mm.1 | -3,2  | 0,01177  | 0,430069 |                     |      |
| TC1300002090.mm.1 | 1,64 Klhl3                   | PSR1300013271.mm.1 | 6,2   | 0,002704 | 0,349612 | Cassette Exon       | 0,25 |
| TC1300002090.mm.1 | 1,64 Klhl3                   | JUC1300006853.mm.1 | 5,95  | 0,007648 | 0,402193 |                     |      |
| TC1300002090.mm.1 | 1,64 Klhl3                   | PSR1300013278.mm.1 | 2,46  | 0,031097 | 0,515253 | Mutually Exclusive  | 0,29 |
| TC1300002090.mm.1 | 1,64 Klhl3                   | JUC1300006848.mm.1 | -2,3  | 0,042094 | 0,546488 |                     |      |
| TC1300002090.mm.1 | 1,64 Klhl3                   | PSR1300013284.mm.1 | -2,33 | 0,025944 | 0,499144 | Cassette Exon       | 0,27 |
| TC1300002090.mm.1 | 1,64 Klhl3                   | JUC1300006861.mm.1 | -2,45 | 0,015165 | 0,452699 |                     |      |
| TC1300002090.mm.1 | 1,64 Klhl3                   | PSR1300013279.mm.1 | -2,46 | 0,014231 | 0,447947 | Mutually Exclusive  | 0,29 |

|                   |       |        |                    |       |          |          |                          |
|-------------------|-------|--------|--------------------|-------|----------|----------|--------------------------|
| TC1300002090.mm.1 | 1,64  | Klh13  | JUC1300006860.mm.1 | -2,79 | 0,016036 | 0,457219 |                          |
| TC0800003186.mm.1 | 1,35  | Pcnx12 | JUC0800013406.mm.1 | 6,2   | 0,00034  | 0,289576 |                          |
| TC0800003186.mm.1 | 1,35  | Pcnx12 | JUC0800013385.mm.1 | 3,26  | 0,012336 | 0,43443  |                          |
| TC0800003186.mm.1 | 1,35  | Pcnx12 | PSR0800024503.mm.1 | 2,74  | 0,009238 | 0,414373 | Cassette Exon 0,2        |
| TC0800003186.mm.1 | 1,35  | Pcnx12 | JUC0800013396.mm.1 | 2,68  | 0,030352 | 0,512923 |                          |
| TC0800003186.mm.1 | 1,35  | Pcnx12 | JUC0800013399.mm.1 | 2,48  | 0,016495 | 0,459399 |                          |
| TC0800003186.mm.1 | 1,35  | Pcnx12 | PSR0800024521.mm.1 | 2,13  | 0,034176 | 0,524992 | Cassette Exon 0,18       |
| TC0800003186.mm.1 | 1,35  | Pcnx12 | JUC0800013374.mm.1 | -2,31 | 0,000515 | 0,303579 |                          |
| TC0800003186.mm.1 | 1,35  | Pcnx12 | PSR0800024524.mm.1 | -2,37 | 0,036441 | 0,530977 | Alternative 5' Donc 0,17 |
| TC0800003186.mm.1 | 1,35  | Pcnx12 | JUC0800013386.mm.1 | -2,65 | 0,030417 | 0,513068 |                          |
| TC0800003186.mm.1 | 1,35  | Pcnx12 | JUC0800013373.mm.1 | -3,02 | 0,028949 | 0,508766 |                          |
| TC0200003201.mm.1 | -1,29 | Abo    | JUC0200013587.mm.1 | 6,19  | 0,0082   | 0,405909 |                          |
| TC0500001783.mm.1 | 2,79  | Wasf3  | JUC0500008993.mm.1 | 6,18  | 0,007708 | 0,402552 |                          |
| TC0500001783.mm.1 | 2,79  | Wasf3  | JUC0500008994.mm.1 | 4,38  | 0,001743 | 0,335996 |                          |
| TC0500001783.mm.1 | 2,79  | Wasf3  | PSR0500016517.mm.1 | 2,69  | 0,001821 | 0,336896 | Cassette Exon 0,43       |
| TC0500001783.mm.1 | 2,79  | Wasf3  | PSR0500016519.mm.1 | -2,34 | 0,002265 | 0,34578  | Cassette Exon 0,11       |
| TC0100000023.mm.1 | 1,38  | St18   | JUC0100000098.mm.1 | 6,18  | 0,000212 | 0,28803  |                          |
| TC0100000023.mm.1 | 1,38  | St18   | JUC0100000099.mm.1 | 4,82  | 0,015735 | 0,455416 |                          |
| TC0100000023.mm.1 | 1,38  | St18   | PSR0100000239.mm.1 | 4,4   | 0,007053 | 0,396402 | Alternative 5' Donc 0,23 |
| TC0100000023.mm.1 | 1,38  | St18   | JUC0100000091.mm.1 | 4,06  | 0,018133 | 0,467325 |                          |
| TC0100000023.mm.1 | 1,38  | St18   | PSR0100000203.mm.1 | 3,91  | 0,002649 | 0,349612 | Cassette Exon 0,4        |
| TC0100000023.mm.1 | 1,38  | St18   | JUC0100000110.mm.1 | 2,73  | 0,006457 | 0,390284 |                          |
| TC0100000023.mm.1 | 1,38  | St18   | PSR0100000233.mm.1 | 2,65  | 0,009316 | 0,414883 | Cassette Exon 0,15       |
| TC0100000023.mm.1 | 1,38  | St18   | PSR0100000201.mm.1 | 2,54  | 0,034682 | 0,526294 | Cassette Exon 0,12       |
| TC0100000023.mm.1 | 1,38  | St18   | PSR0100000219.mm.1 | 2,5   | 0,019526 | 0,474538 | Cassette Exon 0,41       |
| TC0100000023.mm.1 | 1,38  | St18   | JUC0100000100.mm.1 | 2,28  | 0,018095 | 0,46716  |                          |
| TC0100000023.mm.1 | 1,38  | St18   | JUC0100000093.mm.1 | 2,12  | 0,009305 | 0,414883 |                          |
| TC0100000023.mm.1 | 1,38  | St18   | JUC0100000113.mm.1 | 2,03  | 0,009489 | 0,416578 |                          |
| TC0100000023.mm.1 | 1,38  | St18   | PSR0100000228.mm.1 | -2,09 | 0,001586 | 0,331726 | Cassette Exon 0,1        |
| TC0100000023.mm.1 | 1,38  | St18   | JUC0100000116.mm.1 | -2,15 | 0,008658 | 0,408463 |                          |
| TC0100000023.mm.1 | 1,38  | St18   | JUC0100000112.mm.1 | -2,16 | 0,010795 | 0,424049 |                          |
| TC0100000023.mm.1 | 1,38  | St18   | JUC0100000117.mm.1 | -2,58 | 0,006742 | 0,393343 |                          |
| TC0100000023.mm.1 | 1,38  | St18   | PSR0100000195.mm.1 | -2,68 | 0,008791 | 0,409822 | Alternative 3' Acce 0,27 |
| TC0100000023.mm.1 | 1,38  | St18   | PSR0100000185.mm.1 | -2,69 | 0,030685 | 0,513877 | Cassette Exon 0,16       |
| TC0100000023.mm.1 | 1,38  | St18   | JUC0100000115.mm.1 | -3,1  | 0,017855 | 0,46623  |                          |
| TC0100000023.mm.1 | 1,38  | St18   | JUC0100000102.mm.1 | -3,21 | 0,023838 | 0,491997 |                          |
| TC0100000023.mm.1 | 1,38  | St18   | JUC0100000089.mm.1 | -4,07 | 0,003382 | 0,354403 |                          |
| TC1600001057.mm.1 | 1,28  | Ttc3   | JUC1600004304.mm.1 | 6,18  | 0,01268  | 0,43631  |                          |
| TC1600001057.mm.1 | 1,28  | Ttc3   | JUC1600004320.mm.1 | 2,61  | 0,032774 | 0,520741 |                          |
| TC1600001057.mm.1 | 1,28  | Ttc3   | JUC1600004332.mm.1 | 2,23  | 0,02813  | 0,506228 |                          |
| TC1600001057.mm.1 | 1,28  | Ttc3   | JUC1600004316.mm.1 | 2,1   | 0,027481 | 0,504126 |                          |
| TC1600001057.mm.1 | 1,28  | Ttc3   | PSR1600008277.mm.1 | -2,04 | 0,003731 | 0,357586 | Alternative 3' Acce 0,08 |
| TC1600001057.mm.1 | 1,28  | Ttc3   | PSR1600008280.mm.1 | -2,25 | 0,049296 | 0,562691 | Alternative 3' Acce 0,2  |
| TC1600001057.mm.1 | 1,28  | Ttc3   | JUC1600004344.mm.1 | -2,94 | 0,042009 | 0,546101 |                          |
| TC0600003121.mm.1 | 5,88  | Gnb3   | JUC0600012645.mm.1 | 6,16  | 0,0013   | 0,323255 |                          |
| TC0600003121.mm.1 | 5,88  | Gnb3   | JUC0600012650.mm.1 | 2,86  | 0,000449 | 0,297771 |                          |
| TC0600003121.mm.1 | 5,88  | Gnb3   | PSR0600024293.mm.1 | 2,78  | 0,004282 | 0,363973 | Cassette Exon 0,29       |
| TC0600003121.mm.1 | 5,88  | Gnb3   | JUC0600012648.mm.1 | 2,77  | 0,003621 | 0,356223 |                          |



|                   |                   |                    |       |          |                              |      |
|-------------------|-------------------|--------------------|-------|----------|------------------------------|------|
| TC0600003121.mm.1 | 5,88 Gnb3         | PSR0600024291.mm.1 | 2,63  | 0,04443  | 0,551566 Cassette Exon       | 0,24 |
| TC0600003121.mm.1 | 5,88 Gnb3         | PSR0600024296.mm.1 | 2,27  | 0,000513 | 0,303579                     |      |
| TC0600003121.mm.1 | 5,88 Gnb3         | PSR0600024297.mm.1 | -2,28 | 0,018109 | 0,467161 Alternative 5' Donc | 0,44 |
| TC0600003121.mm.1 | 5,88 Gnb3         | PSR0600024299.mm.1 | -2,92 | 0,023272 | 0,49004 Cassette Exon        | 0,33 |
| TC0600003121.mm.1 | 5,88 Gnb3         | JUC0600012653.mm.1 | -3,17 | 0,000914 | 0,313363                     |      |
| TC0600003121.mm.1 | 5,88 Gnb3         | PSR0600024301.mm.1 | -3,68 | 0,002218 | 0,345773 Cassette Exon       | 0,33 |
| TC0600003121.mm.1 | 5,88 Gnb3         | PSR0600024287.mm.1 | -3,72 | 0,017981 | 0,466929 Alternative 5' Donc | 0,56 |
| TC0600003121.mm.1 | 5,88 Gnb3         | PSR0600024289.mm.1 | -3,84 | 0,030627 | 0,513669 Cassette Exon       | 0,4  |
| TC0600003121.mm.1 | 5,88 Gnb3         | JUC0600012651.mm.1 | -4,2  | 0,002313 | 0,346468                     |      |
| TC0600003121.mm.1 | 5,88 Gnb3         | PSR0600024298.mm.1 | -4,25 | 0,003569 | 0,356223 Cassette Exon       | 0,47 |
| TC0600003121.mm.1 | 5,88 Gnb3         | PSR0600024295.mm.1 | -5,53 | 0,016262 | 0,458329 Alternative 3' Acce | 0,34 |
| TC0600003121.mm.1 | 5,88 Gnb3         | PSR0600024300.mm.1 | -5,88 | 0,004346 | 0,365385 Cassette Exon       | 0,33 |
| TC0600003121.mm.1 | 5,88 Gnb3         | JUC0600012655.mm.1 | -7,17 | 0,010105 | 0,418998                     |      |
| TC0200003473.mm.1 | 1,3 Zeb2; Mir5129 | JUC0200015019.mm.1 | 6,16  | 0,006354 | 0,389469                     |      |
| TC0200003473.mm.1 | 1,3 Zeb2; Mir5129 | PSR0200029758.mm.1 | -2,52 | 0,011037 | 0,425682 Alternative 5' Donc | 0,24 |
| TC0200003473.mm.1 | 1,3 Zeb2; Mir5129 | JUC0200015007.mm.1 | -3,03 | 0,01688  | 0,460797                     |      |
| TC0200001747.mm.1 | 3,27 Disp2        | JUC0200006465.mm.1 | 6,15  | 0,003217 | 0,354243                     |      |
| TC0200001747.mm.1 | 3,27 Disp2        | PSR0200012974.mm.1 | 4,97  | 0,00034  | 0,289576 Cassette Exon       | 0,49 |
| TC0200001747.mm.1 | 3,27 Disp2        | JUC0200006469.mm.1 | 3,39  | 0,044217 | 0,55119                      |      |
| TC0200001747.mm.1 | 3,27 Disp2        | PSR0200012961.mm.1 | -2,44 | 0,008366 | 0,406435 Cassette Exon       | 0,13 |
| TC0200001747.mm.1 | 3,27 Disp2        | PSR0200012973.mm.1 | -3,01 | 0,006164 | 0,387873 Intron Retention    | 0,5  |
| TC0200001747.mm.1 | 3,27 Disp2        | PSR0200012969.mm.1 | -3,38 | 0,024952 | 0,495859 Intron Retention    | 0,6  |
| TC0200001747.mm.1 | 3,27 Disp2        | PSR0200012978.mm.1 | -3,9  | 0,014354 | 0,448293 Cassette Exon       | 0,2  |
| TC0200001747.mm.1 | 3,27 Disp2        | PSR0200012965.mm.1 | -4,21 | 0,01676  | 0,460504 Intron Retention    | 0,69 |
| TC0200001747.mm.1 | 3,27 Disp2        | PSR0200012980.mm.1 | -4,4  | 0,004369 | 0,36554 Cassette Exon        | 0,41 |
| TC0200001747.mm.1 | 3,27 Disp2        | PSR0200012981.mm.1 | -6,38 | 0,005267 | 0,378003 Cassette Exon       | 0,41 |
| TC0200001747.mm.1 | 3,27 Disp2        | PSR0200012967.mm.1 | -7    | 0,001508 | 0,330215 Intron Retention    | 0,75 |
| TC0200001747.mm.1 | 3,27 Disp2        | JUC0200006473.mm.1 | -7,68 | 0,006925 | 0,395156                     |      |
| TC1000000246.mm.1 | -1,03 Ptprk       | JUC1000000958.mm.1 | 6,15  | 0,008203 | 0,405909                     |      |
| TC1000000246.mm.1 | -1,03 Ptprk       | JUC1000000937.mm.1 | 3,49  | 0,005786 | 0,383104                     |      |
| TC1000000246.mm.1 | -1,03 Ptprk       | JUC1000000960.mm.1 | 2,29  | 0,04351  | 0,549937                     |      |
| TC1000000246.mm.1 | -1,03 Ptprk       | JUC1000000957.mm.1 | 2,28  | 0,032401 | 0,519282                     |      |
| TC1000000246.mm.1 | -1,03 Ptprk       | JUC1000000952.mm.1 | -2,21 | 0,015594 | 0,454982                     |      |
| TC0200001352.mm.1 | 1,01 Nup160       | JUC0200005131.mm.1 | 6,14  | 0,011056 | 0,425887                     |      |
| TC0900000542.mm.1 | 3,26 Dscaml1      | JUC0900001964.mm.1 | 6,1   | 0,00048  | 0,298999                     |      |
| TC0900000542.mm.1 | 3,26 Dscaml1      | JUC0900001966.mm.1 | 5,02  | 0,000111 | 0,267977                     |      |
| TC0900000542.mm.1 | 3,26 Dscaml1      | JUC0900001945.mm.1 | 4,54  | 0,009203 | 0,413922                     |      |
| TC0900000542.mm.1 | 3,26 Dscaml1      | JUC0900001931.mm.1 | 3,56  | 0,034167 | 0,524988                     |      |
| TC0900000542.mm.1 | 3,26 Dscaml1      | PSR0900003764.mm.1 | 3,32  | 0,038813 | 0,537594 Cassette Exon       | 0,19 |
| TC0900000542.mm.1 | 3,26 Dscaml1      | PSR0900003794.mm.1 | 2,54  | 0,000244 | 0,28803 Cassette Exon        | 0,21 |
| TC0900000542.mm.1 | 3,26 Dscaml1      | PSR0900003779.mm.1 | 2,33  | 0,001377 | 0,32572 Cassette Exon        | 0,05 |
| TC0900000542.mm.1 | 3,26 Dscaml1      | PSR0900003761.mm.1 | -2,26 | 0,022361 | 0,486366 Cassette Exon       | 0,33 |
| TC0900000542.mm.1 | 3,26 Dscaml1      | PSR0900003765.mm.1 | -2,49 | 0,027326 | 0,503766 Cassette Exon       | 0,34 |
| TC0900000542.mm.1 | 3,26 Dscaml1      | PSR0900003771.mm.1 | -2,54 | 0,000649 | 0,304044 Cassette Exon       | 0,39 |
| TC0900000542.mm.1 | 3,26 Dscaml1      | JUC0900001963.mm.1 | -2,58 | 0,025776 | 0,498465                     |      |
| TC0900000542.mm.1 | 3,26 Dscaml1      | JUC0900001929.mm.1 | -2,69 | 0,010931 | 0,424831                     |      |
| TC0900000542.mm.1 | 3,26 Dscaml1      | JUC0900001947.mm.1 | -2,79 | 0,010173 | 0,419711                     |      |
| TC0900000542.mm.1 | 3,26 Dscaml1      | JUC0900001960.mm.1 | -3    | 0,003905 | 0,35953                      |      |

|                   |       |         |                    |       |          |          |                     |      |
|-------------------|-------|---------|--------------------|-------|----------|----------|---------------------|------|
| TC0900000542.mm.1 | 3,26  | Dscaml1 | JUC0900001951.mm.1 | -3,06 | 0,004344 | 0,365267 |                     |      |
| TC0900000542.mm.1 | 3,26  | Dscaml1 | JUC0900001934.mm.1 | -3,1  | 0,012031 | 0,432286 |                     |      |
| TC0900000542.mm.1 | 3,26  | Dscaml1 | JUC0900001940.mm.1 | -3,11 | 0,00377  | 0,357586 |                     |      |
| TC0900000542.mm.1 | 3,26  | Dscaml1 | JUC0900001967.mm.1 | -3,16 | 0,01421  | 0,447798 |                     |      |
| TC0900000542.mm.1 | 3,26  | Dscaml1 | PSR0900003790.mm.1 | -3,57 | 0,006062 | 0,386691 | Cassette Exon       | 0,38 |
| TC0900000542.mm.1 | 3,26  | Dscaml1 | PSR0900003766.mm.1 | -3,68 | 0,0221   | 0,485486 | Cassette Exon       | 0,4  |
| TC0900000542.mm.1 | 3,26  | Dscaml1 | JUC0900001955.mm.1 | -3,79 | 0,009519 | 0,416602 |                     |      |
| TC0900000542.mm.1 | 3,26  | Dscaml1 | JUC0900001942.mm.1 | -4,38 | 0,005616 | 0,381191 |                     |      |
| TC0900000542.mm.1 | 3,26  | Dscaml1 | PSR0900003759.mm.1 | -4,43 | 0,00223  | 0,345773 | Cassette Exon       | 0,41 |
| TC0900000542.mm.1 | 3,26  | Dscaml1 | JUC0900001950.mm.1 | -4,46 | 0,013581 | 0,443703 |                     |      |
| TC0900000542.mm.1 | 3,26  | Dscaml1 | PSR0900003760.mm.1 | -5,29 | 0,006961 | 0,395722 | Cassette Exon       | 0,29 |
| TC0900000542.mm.1 | 3,26  | Dscaml1 | JUC0900001943.mm.1 | -5,32 | 0,009053 | 0,412827 |                     |      |
| TC0900000542.mm.1 | 3,26  | Dscaml1 | JUC0900001932.mm.1 | -5,73 | 0,005069 | 0,375225 |                     |      |
| TC0900000542.mm.1 | 3,26  | Dscaml1 | JUC0900001935.mm.1 | -6,03 | 0,010521 | 0,422224 |                     |      |
| TC0900000542.mm.1 | 3,26  | Dscaml1 | JUC0900001941.mm.1 | -6,55 | 0,006148 | 0,38784  |                     |      |
| TC0900000542.mm.1 | 3,26  | Dscaml1 | JUC0900001930.mm.1 | -6,57 | 0,007043 | 0,396259 |                     |      |
| TC0900000542.mm.1 | 3,26  | Dscaml1 | JUC0900001957.mm.1 | -7,39 | 0,004334 | 0,364898 |                     |      |
| TC0900000542.mm.1 | 3,26  | Dscaml1 | JUC0900001953.mm.1 | -7,42 | 0,010334 | 0,420914 |                     |      |
| TC0900000542.mm.1 | 3,26  | Dscaml1 | JUC0900001939.mm.1 | -7,51 | 0,002449 | 0,349135 |                     |      |
| TC0900000542.mm.1 | 3,26  | Dscaml1 | JUC0900001928.mm.1 | -7,54 | 0,003911 | 0,359698 |                     |      |
| TC0900000542.mm.1 | 3,26  | Dscaml1 | JUC0900001968.mm.1 | -9,07 | 0,004973 | 0,373851 |                     |      |
| TC0900000750.mm.1 | 1,44  | Parp6   | JUC0900002958.mm.1 | 6,1   | 0,007316 | 0,398848 |                     |      |
| TC0900000750.mm.1 | 1,44  | Parp6   | JUC0900002961.mm.1 | 2,94  | 0,004194 | 0,362958 |                     |      |
| TC0900000750.mm.1 | 1,44  | Parp6   | JUC0900002940.mm.1 | -2,01 | 0,004674 | 0,370183 |                     |      |
| TC1200000389.mm.1 | 3,4   | Nrcam   | JUC1200001538.mm.1 | 6,07  | 0,000236 | 0,28803  |                     |      |
| TC1200000389.mm.1 | 3,4   | Nrcam   | JUC1200001539.mm.1 | 3,56  | 0,000311 | 0,288663 |                     |      |
| TC1200000389.mm.1 | 3,4   | Nrcam   | PSR1200002762.mm.1 | 2,63  | 0,019032 | 0,471845 | Cassette Exon       | 0,21 |
| TC1200000389.mm.1 | 3,4   | Nrcam   | JUC1200001550.mm.1 | 2,62  | 0,035886 | 0,52938  |                     |      |
| TC1200000389.mm.1 | 3,4   | Nrcam   | JUC1200001542.mm.1 | 2,24  | 0,000728 | 0,306408 |                     |      |
| TC1200000389.mm.1 | 3,4   | Nrcam   | PSR1200002797.mm.1 | 2,18  | 0,004333 | 0,364898 | Cassette Exon       | 0,11 |
| TC1200000389.mm.1 | 3,4   | Nrcam   | PSR1200002788.mm.1 | -2,26 | 0,016249 | 0,458312 | Cassette Exon       | 0,18 |
| TC1200000389.mm.1 | 3,4   | Nrcam   | PSR1200002792.mm.1 | -2,37 | 0,010885 | 0,424247 | Cassette Exon       | 0,18 |
| TC1200000389.mm.1 | 3,4   | Nrcam   | JUC1200001566.mm.1 | -2,68 | 0,042793 | 0,548097 |                     |      |
| TC1200000389.mm.1 | 3,4   | Nrcam   | PSR1200002752.mm.1 | -2,72 | 0,019478 | 0,474295 | Cassette Exon       | 0,16 |
| TC1200000389.mm.1 | 3,4   | Nrcam   | JUC1200001537.mm.1 | -2,8  | 0,019274 | 0,473074 |                     |      |
| TC1200000389.mm.1 | 3,4   | Nrcam   | PSR1200002787.mm.1 | -2,91 | 0,016223 | 0,458312 | Cassette Exon       | 0,11 |
| TC1200000389.mm.1 | 3,4   | Nrcam   | PSR1200002775.mm.1 | -2,93 | 0,006773 | 0,393372 | Cassette Exon       | 0,11 |
| TC1200000389.mm.1 | 3,4   | Nrcam   | PSR1200002781.mm.1 | -3,05 | 0,013778 | 0,444974 | Cassette Exon       | 0,17 |
| TC1200000389.mm.1 | 3,4   | Nrcam   | JUC1200001556.mm.1 | -4,22 | 0,004169 | 0,3623   |                     |      |
| TC1200000389.mm.1 | 3,4   | Nrcam   | PSR1200002793.mm.1 | -4,33 | 0,005503 | 0,379939 | Cassette Exon       | 0,44 |
| TC1200000389.mm.1 | 3,4   | Nrcam   | JUC1200001577.mm.1 | -4,85 | 0,00046  | 0,298999 |                     |      |
| TC1200000389.mm.1 | 3,4   | Nrcam   | PSR1200002754.mm.1 | -5,21 | 0,002339 | 0,347265 | Alternative 5' Donc | 0,44 |
| TC1200000389.mm.1 | 3,4   | Nrcam   | JUC1200001569.mm.1 | -5,5  | 0,02813  | 0,506228 |                     |      |
| TC1200000389.mm.1 | 3,4   | Nrcam   | JUC1200001543.mm.1 | -5,86 | 0,000166 | 0,272566 |                     |      |
| TC1200000389.mm.1 | 3,4   | Nrcam   | PSR1200002764.mm.1 | -6,03 | 0,000516 | 0,303579 | Intron Retention    | 0,75 |
| TC1200000389.mm.1 | 3,4   | Nrcam   | JUC1200001574.mm.1 | -6,04 | 0,02869  | 0,508019 |                     |      |
| TC1200000389.mm.1 | 3,4   | Nrcam   | JUC1200001565.mm.1 | -7,89 | 0,011875 | 0,431125 |                     |      |
| TC0400004090.mm.1 | -1,01 | Espn    | JUC0400017770.mm.1 | 6,07  | 0,003182 | 0,354243 |                     |      |

|                   |                    |                    |       |          |          |                          |
|-------------------|--------------------|--------------------|-------|----------|----------|--------------------------|
| TC0800002767.mm.1 | 4,19 Cdh8          | JUC0800011620.mm.1 | 6,06  | 0,001191 | 0,321162 |                          |
| TC0800002767.mm.1 | 4,19 Cdh8          | JUC0800011614.mm.1 | 4,39  | 0,000345 | 0,289579 |                          |
| TC0800002767.mm.1 | 4,19 Cdh8          | PSR0800021283.mm.1 | 2,12  | 0,001399 | 0,325997 | Cassette Exon 0,11       |
| TC0800002767.mm.1 | 4,19 Cdh8          | PSR0800021275.mm.1 | -2,06 | 0,026552 | 0,501435 |                          |
| TC0800002767.mm.1 | 4,19 Cdh8          | PSR0800021269.mm.1 | -2,19 | 0,021587 | 0,483245 | Cassette Exon 0,43       |
| TC0800002767.mm.1 | 4,19 Cdh8          | PSR0800021284.mm.1 | -2,47 | 0,000141 | 0,272178 | Alternative 5' Donc 0,1  |
| TC0800002767.mm.1 | 4,19 Cdh8          | JUC0800011611.mm.1 | -3,54 | 0,017019 | 0,461709 |                          |
| TC0800002767.mm.1 | 4,19 Cdh8          | PSR0800021268.mm.1 | -3,58 | 0,0044   | 0,366403 | Cassette Exon 0,43       |
| TC0800002767.mm.1 | 4,19 Cdh8          | PSR0800021265.mm.1 | -4,35 | 0,001471 | 0,329052 | Alternative 3' Acce 0,32 |
| TC0800002767.mm.1 | 4,19 Cdh8          | PSR0800021286.mm.1 | -4,56 | 0,002492 | 0,349135 | Cassette Exon 0,28       |
| TC0800002767.mm.1 | 4,19 Cdh8          | PSR0800021272.mm.1 | -4,86 | 0,009034 | 0,412736 | Cassette Exon 0,53       |
| TC0800002767.mm.1 | 4,19 Cdh8          | PSR0800021270.mm.1 | -5,15 | 0,003816 | 0,35811  | Cassette Exon 0,43       |
| TC0800002767.mm.1 | 4,19 Cdh8          | PSR0800021287.mm.1 | -6,23 | 0,001092 | 0,317225 | Cassette Exon 0,28       |
| TC0800002767.mm.1 | 4,19 Cdh8          | JUC0800011622.mm.1 | -6,51 | 0,005327 | 0,378059 |                          |
| TC0800002767.mm.1 | 4,19 Cdh8          | JUC0800011625.mm.1 | -8,21 | 0,002616 | 0,349612 |                          |
| TC0800002767.mm.1 | 4,19 Cdh8          | JUC0800011623.mm.1 | -8,53 | 0,006183 | 0,387873 |                          |
| TC0200002171.mm.1 | 1,74 4930529M08Rik | PSR0200017195.mm.1 | 6,06  | 0,000002 | 0,179072 | Alternative 5' Donc 0,29 |
| TC0200002171.mm.1 | 1,74 4930529M08Rik | PSR0200017206.mm.1 | 4,37  | 0,016263 | 0,458329 | Cassette Exon 0,32       |
| TC0200002171.mm.1 | 1,74 4930529M08Rik | PSR0200017197.mm.1 | 3,29  | 0,005469 | 0,379939 | Cassette Exon 0,29       |
| TC0200002171.mm.1 | 1,74 4930529M08Rik | PSR0200017191.mm.1 | 3,29  | 0,01892  | 0,471305 | Cassette Exon 0,22       |
| TC0200002171.mm.1 | 1,74 4930529M08Rik | JUC0200008655.mm.1 | 2,84  | 0,027741 | 0,505023 |                          |
| TC0200002171.mm.1 | 1,74 4930529M08Rik | PSR0200017183.mm.1 | 2,69  | 0,0189   | 0,47127  | Mutually Exclusive 0,18  |
| TC0200002171.mm.1 | 1,74 4930529M08Rik | PSR0200017201.mm.1 | 2,67  | 0,016553 | 0,459612 | Cassette Exon 0,12       |
| TC0200002171.mm.1 | 1,74 4930529M08Rik | JUC0200008653.mm.1 | 2,65  | 0,016637 | 0,459985 |                          |
| TC0200002171.mm.1 | 1,74 4930529M08Rik | PSR0200017194.mm.1 | 2,64  | 0,041484 | 0,544745 | Cassette Exon 0,29       |
| TC0200002171.mm.1 | 1,74 4930529M08Rik | JUC0200008656.mm.1 | 2,61  | 0,017778 | 0,465534 |                          |
| TC0200002171.mm.1 | 1,74 4930529M08Rik | PSR0200017203.mm.1 | 2,49  | 0,004641 | 0,370181 | Cassette Exon 0,19       |
| TC0200002171.mm.1 | 1,74 4930529M08Rik | PSR0200017184.mm.1 | -2,03 | 0,021779 | 0,48438  | Mutually Exclusive 0,18  |
| TC0200002171.mm.1 | 1,74 4930529M08Rik | JUC0200008666.mm.1 | -2,09 | 0,027334 | 0,503766 |                          |
| TC0200002171.mm.1 | 1,74 4930529M08Rik | PSR0200017211.mm.1 | -2,1  | 0,0098   | 0,417839 | Alternative 5' Donc 0,15 |
| TC0200002171.mm.1 | 1,74 4930529M08Rik | PSR0200017190.mm.1 | -2,24 | 0,046582 | 0,556761 | Alternative 3' Acce 0,21 |
| TC0200002171.mm.1 | 1,74 4930529M08Rik | PSR0200017189.mm.1 | -2,33 | 0,018308 | 0,468049 | Alternative 3' Acce 0,21 |
| TC0200002171.mm.1 | 1,74 4930529M08Rik | PSR0200017164.mm.1 | -2,49 | 0,001827 | 0,337273 | Cassette Exon 0,12       |
| TC0200002171.mm.1 | 1,74 4930529M08Rik | PSR0200017173.mm.1 | -2,66 | 0,049174 | 0,562376 | Alternative 5' Donc 0,22 |
| TC0600003107.mm.1 | 1,8 Clstn3         | JUC0600012494.mm.1 | 6,06  | 0,022036 | 0,485268 |                          |
| TC0600003107.mm.1 | 1,8 Clstn3         | JUC0600012508.mm.1 | 4,96  | 0,023083 | 0,489697 |                          |
| TC0600003107.mm.1 | 1,8 Clstn3         | JUC0600012509.mm.1 | 4,04  | 0,036178 | 0,529944 |                          |
| TC0600003107.mm.1 | 1,8 Clstn3         | JUC0600012504.mm.1 | 3,63  | 0,012036 | 0,432286 |                          |
| TC0600003107.mm.1 | 1,8 Clstn3         | JUC0600012507.mm.1 | 2,21  | 0,010839 | 0,424161 |                          |
| TC0600003107.mm.1 | 1,8 Clstn3         | PSR0600023985.mm.1 | -2,08 | 0,039038 | 0,53823  | Alternative 5' Donc 0,16 |
| TC0600003107.mm.1 | 1,8 Clstn3         | PSR0600023986.mm.1 | -2,16 | 0,042588 | 0,548047 | Alternative 5' Donc 0,16 |
| TC0600003107.mm.1 | 1,8 Clstn3         | PSR0600023975.mm.1 | -2,49 | 0,028018 | 0,505851 | Alternative 3' Acce 0,2  |
| TC0600003107.mm.1 | 1,8 Clstn3         | JUC0600012512.mm.1 | -3,37 | 0,017341 | 0,46353  |                          |
| TC1100004002.mm.1 | 1,84 Abca6         | JUC1100019666.mm.1 | 6,06  | 0,004438 | 0,367041 |                          |
| TC1100004002.mm.1 | 1,84 Abca6         | JUC1100019672.mm.1 | 3,72  | 0,013172 | 0,440567 |                          |
| TC1100004002.mm.1 | 1,84 Abca6         | PSR1100037580.mm.1 | 2,5   | 0,001106 | 0,317328 | Cassette Exon 0,14       |
| TC1100004002.mm.1 | 1,84 Abca6         | JUC1100019669.mm.1 | 2,1   | 0,044219 | 0,55119  |                          |
| TC1100004002.mm.1 | 1,84 Abca6         | PSR1100037574.mm.1 | -2,03 | 0,003511 | 0,355749 |                          |

|                   |                       |                            |        |          |                              |      |
|-------------------|-----------------------|----------------------------|--------|----------|------------------------------|------|
| TC1100004002.mm.1 | 1,84 Abca6            | JUC1100019698.mm.1         | -2,2   | 0,013098 | 0,439759                     |      |
| TC1100004002.mm.1 | 1,84 Abca6            | JUC1100019671.mm.1         | -2,41  | 0,012517 | 0,435429                     |      |
| TC1100000713.mm.1 | 1,44 Trim17; Hist3h2a | JUC1100002920.mm.1         | 6,05   | 0,003334 | 0,354243                     |      |
| TC1100000713.mm.1 | 1,44 Trim17; Hist3h2a | PSR1100005662.mm.1         | 5,3    | 0,002726 | 0,349612 Alternative 5' Donc | 0,35 |
| TC1100000713.mm.1 | 1,44 Trim17; Hist3h2a | PSR1100005664.mm.1         | 4,01   | 0,029503 | 0,510123 Alternative 5' Donc | 0,35 |
| TC1100000713.mm.1 | 1,44 Trim17; Hist3h2a | PSR1100005663.mm.1         | 3,57   | 0,008211 | 0,405909 Alternative 5' Donc | 0,35 |
| TC0X00000724.mm.1 | -1,37 Xlr4d-ps        | JUC0X00002512.mm.1         | 6,05   | 0,007594 | 0,401712                     |      |
| TC0X00000724.mm.1 | -1,37 Xlr4d-ps        | PSR0X00005016.mm.1         | 2,03   | 0,029396 | 0,509995 Cassette Exon       | 0,23 |
| TC1500002214.mm.1 | 5,26 Faim2            | PSR1500018132.mm.1         | 6,04   | 0,000739 | 0,307808 Cassette Exon       | 0,49 |
| TC1500002214.mm.1 | 5,26 Faim2            | JUC1500010345.mm.1         | 5,96   | 0,002339 | 0,347265                     |      |
| TC1500002214.mm.1 | 5,26 Faim2            | JUC1500010344.mm.1         | 5,42   | 0,000263 | 0,28803                      |      |
| TC1500002214.mm.1 | 5,26 Faim2            | JUC1500010343.mm.1         | 4,15   | 0,001328 | 0,325252                     |      |
| TC1500002214.mm.1 | 5,26 Faim2            | PSR1500018129.mm.1         | 2,73   | 0,002654 | 0,349612 Cassette Exon       | 0,19 |
| TC1500002214.mm.1 | 5,26 Faim2            | JUC1500010342.mm.1         | 2,64   | 0,011256 | 0,426718                     |      |
| TC1500002214.mm.1 | 5,26 Faim2            | PSR1500018134.mm.1         | 2,28   | 0,005801 | 0,383104 Cassette Exon       | 0,39 |
| TC1500002214.mm.1 | 5,26 Faim2            | PSR1500018128.mm.1         | -3,3   | 0,04239  | 0,547599 Alternative 3' Acce | 0,38 |
| TC1500002214.mm.1 | 5,26 Faim2            | PSR1500018139.mm.1         | -3,67  | 0,007606 | 0,401767 Cassette Exon       | 0,38 |
| TC1500002214.mm.1 | 5,26 Faim2            | JUC1500010348.mm.1         | -5,17  | 0,009024 | 0,412625                     |      |
| TC1500002214.mm.1 | 5,26 Faim2            | PSR1500018142.mm.1         | -5,4   | 0,014724 | 0,450372 Alternative 5' Donc | 0,32 |
| TC1500002214.mm.1 | 5,26 Faim2            | JUC1500010350.mm.1         | -8,66  | 0,002271 | 0,345986                     |      |
| TC1500002214.mm.1 | 5,26 Faim2            | PSR1500018141.mm.1         | -11,44 | 0,003187 | 0,354243 Alternative 5' Donc | 0,32 |
| TC0500002947.mm.1 | 2,63 Cplx1            | JUC0500014190.mm.1         | 6,04   | 0,000005 | 0,179072                     |      |
| TC0500002947.mm.1 | 2,63 Cplx1            | PSR0500026050.mm.1         | 2,81   | 0,017242 | 0,462729 Alternative 3' Acce | 0,29 |
| TC0500002947.mm.1 | 2,63 Cplx1            | PSR0500026055.mm.1         | 2,63   | 0,005876 | 0,383835 Cassette Exon       | 0,2  |
| TC0500002947.mm.1 | 2,63 Cplx1            | JUC0500014192.mm.1         | 2,04   | 0,000329 | 0,28927                      |      |
| TC0500002947.mm.1 | 2,63 Cplx1            | PSR0500026056.mm.1         | -3,52  | 0,012689 | 0,436349 Alternative 5' Donc | 0,4  |
| TC0500002947.mm.1 | 2,63 Cplx1            | JUC0500014193.mm.1         | -3,97  | 0,044582 | 0,551982                     |      |
| TC1700000995.mm.1 | 1,82 Fsd1             | JUC1700005044.mm.1         | 6,02   | 0,045692 | 0,554833                     |      |
| TC1700000995.mm.1 | 1,82 Fsd1             | JUC1700005035.mm.1         | 4,7    | 0,000056 | 0,24627                      |      |
| TC1500000747.mm.1 | 3,47                  | sept-03 JUC1500003326.mm.1 | 6,01   | 0,004461 | 0,36753                      |      |
| TC1500000747.mm.1 | 3,47                  | sept-03 PSR1500005887.mm.1 | 2,18   | 0,003105 | 0,353892 Cassette Exon       | 0,29 |
| TC1500000747.mm.1 | 3,47                  | sept-03 JUC1500003331.mm.1 | -2,7   | 0,048504 | 0,560936                     |      |
| TC1500000747.mm.1 | 3,47                  | sept-03 PSR1500005883.mm.1 | -2,82  | 0,02298  | 0,488876 Cassette Exon       | 0,19 |
| TC1500000747.mm.1 | 3,47                  | sept-03 PSR1500005880.mm.1 | -2,86  | 0,022275 | 0,485961 Cassette Exon       | 0,3  |
| TC1500000747.mm.1 | 3,47                  | sept-03 JUC1500003323.mm.1 | -3,03  | 0,010527 | 0,422224                     |      |
| TC1500000747.mm.1 | 3,47                  | sept-03 PSR1500005890.mm.1 | -3,7   | 0,0023   | 0,346364 Alternative 5' Donc | 0,45 |
| TC1500000747.mm.1 | 3,47                  | sept-03 JUC1500003333.mm.1 | -3,7   | 0,005857 | 0,383747                     |      |
| TC1500000747.mm.1 | 3,47                  | sept-03 PSR1500005879.mm.1 | -3,94  | 0,004069 | 0,361956 Cassette Exon       | 0,27 |
| TC1500000747.mm.1 | 3,47                  | sept-03 PSR1500005881.mm.1 | -4,3   | 0,016594 | 0,459691 Cassette Exon       | 0,35 |
| TC0500003019.mm.1 | 1,64 Sez6l            | JUC0500014619.mm.1         | 5,98   | 0,000319 | 0,288663                     |      |
| TC0500003019.mm.1 | 1,64 Sez6l            | JUC0500014618.mm.1         | 2,96   | 0,026903 | 0,502518                     |      |
| TC0500003019.mm.1 | 1,64 Sez6l            | PSR0500026784.mm.1         | 2,12   | 0,008794 | 0,409822 Cassette Exon       | 0,16 |
| TC0500003019.mm.1 | 1,64 Sez6l            | PSR0500026793.mm.1         | -2,1   | 0,022795 | 0,48821 Cassette Exon        | 0,21 |
| TC0500003019.mm.1 | 1,64 Sez6l            | JUC0500014626.mm.1         | -2,44  | 0,007713 | 0,402552                     |      |
| TC0500003019.mm.1 | 1,64 Sez6l            | JUC0500014631.mm.1         | -3,15  | 0,038243 | 0,535883                     |      |
| TC0500003019.mm.1 | 1,64 Sez6l            | JUC0500014630.mm.1         | -3,8   | 0,006261 | 0,388628                     |      |
| TC0800001613.mm.1 | 7,23 Pcp2             | JUC0800007225.mm.1         | 5,95   | 0,001094 | 0,317328                     |      |
| TC0800001613.mm.1 | 7,23 Pcp2             | JUC0800007221.mm.1         | 3,99   | 0,002557 | 0,349501                     |      |

|                   |                    |                    |        |          |                              |      |
|-------------------|--------------------|--------------------|--------|----------|------------------------------|------|
| TC0800001613.mm.1 | 7,23 Pcp2          | PSR0800013258.mm.1 | 3,15   | 0,002181 | 0,344453 Cassette Exon       | 0,12 |
| TC0800001613.mm.1 | 7,23 Pcp2          | PSR0800013265.mm.1 | -2,27  | 0,011145 | 0,426226 Cassette Exon       | 0,12 |
| TC0800001613.mm.1 | 7,23 Pcp2          | PSR0800013264.mm.1 | -10,58 | 0,006622 | 0,392392 Cassette Exon       | 0,48 |
| TC0800001613.mm.1 | 7,23 Pcp2          | PSR0800013259.mm.1 | -11,18 | 0,00061  | 0,304044 Intron Retention    | 0,75 |
| TC0800001613.mm.1 | 7,23 Pcp2          | PSR0800013261.mm.1 | -12,87 | 0,004003 | 0,361169                     |      |
| TC0800001613.mm.1 | 7,23 Pcp2          | PSR0800013263.mm.1 | -15,79 | 0,00219  | 0,344463 Alternative 5' Donc | 0,16 |
| TC1400002301.mm.1 | -1,76 Adam7        | JUC1400009779.mm.1 | 5,95   | 0,003365 | 0,354278                     |      |
| TC1400002301.mm.1 | -1,76 Adam7        | PSR1400017809.mm.1 | 2,39   | 0,033018 | 0,521478 Cassette Exon       | 0,13 |
| TC1100001769.mm.1 | 2,17 Kcnh6         | JUC1100008685.mm.1 | 5,91   | 0,000018 | 0,207103                     |      |
| TC1100001769.mm.1 | 2,17 Kcnh6         | PSR1100016713.mm.1 | 3,1    | 0,002961 | 0,352501 Alternative 5' Donc | 0,34 |
| TC1100001769.mm.1 | 2,17 Kcnh6         | PSR1100016714.mm.1 | 2,32   | 0,008572 | 0,40821 Cassette Exon        | 0,31 |
| TC1100001769.mm.1 | 2,17 Kcnh6         | PSR1100016709.mm.1 | 2,02   | 0,007827 | 0,403089 Cassette Exon       | 0,09 |
| TC1100001769.mm.1 | 2,17 Kcnh6         | JUC1100008689.mm.1 | -2,84  | 0,049584 | 0,563357                     |      |
| TC1100001769.mm.1 | 2,17 Kcnh6         | PSR1100016718.mm.1 | -3,09  | 0,039283 | 0,539034 Cassette Exon       | 0,33 |
| TC1000001919.mm.1 | -1,31 Lama2        | JUC1000007531.mm.1 | 5,9    | 0,03021  | 0,512452                     |      |
| TC1000001919.mm.1 | -1,31 Lama2        | JUC1000007554.mm.1 | -2,58  | 0,00785  | 0,403345                     |      |
| TC1000001919.mm.1 | -1,31 Lama2        | JUC1000007558.mm.1 | -2,81  | 0,027249 | 0,503642                     |      |
| TC1000001919.mm.1 | -1,31 Lama2        | JUC1000007574.mm.1 | -2,94  | 0,001003 | 0,316361                     |      |
| TC0700004641.mm.1 | 1,4 Sptbn4         | JUC0700012368.mm.1 | 5,88   | 0,007262 | 0,39826                      |      |
| TC0700004641.mm.1 | 1,4 Sptbn4         | JUC0700012343.mm.1 | 2,02   | 0,040856 | 0,543295                     |      |
| TC0700004641.mm.1 | 1,4 Sptbn4         | JUC0700012351.mm.1 | -2,02  | 0,012315 | 0,434392                     |      |
| TC0700004641.mm.1 | 1,4 Sptbn4         | PSR0700023264.mm.1 | -2,21  | 0,01114  | 0,426226 Alternative 5' Donc | 0,06 |
| TC0700004641.mm.1 | 1,4 Sptbn4         | JUC0700012335.mm.1 | -2,79  | 0,040845 | 0,543283                     |      |
| TC0400004170.mm.1 | -1,02 Agrn         | JUC0400018261.mm.1 | 5,88   | 0,00828  | 0,405992                     |      |
| TC0300002901.mm.1 | 2,52 Ank2; Gm4392  | JUC0300011946.mm.1 | 5,87   | 0,00185  | 0,337414                     |      |
| TC0300002901.mm.1 | 2,52 Ank2; Gm4392  | JUC0300011974.mm.1 | 4,56   | 0,001407 | 0,326083                     |      |
| TC0300002901.mm.1 | 2,52 Ank2; Gm4392  | PSR0300022919.mm.1 | 2,58   | 0,017461 | 0,463886 Cassette Exon       | 0,35 |
| TC0300002901.mm.1 | 2,52 Ank2; Gm4392  | PSR0300022920.mm.1 | 2,09   | 0,016978 | 0,461419 Cassette Exon       | 0,26 |
| TC0300002901.mm.1 | 2,52 Ank2; Gm4392  | JUC0300011967.mm.1 | -2,19  | 0,013145 | 0,440196                     |      |
| TC0300002901.mm.1 | 2,52 Ank2; Gm4392  | JUC0300012001.mm.1 | -2,26  | 0,014687 | 0,450253                     |      |
| TC0300002901.mm.1 | 2,52 Ank2; Gm4392  | PSR0300022949.mm.1 | -2,45  | 0,042804 | 0,548097 Cassette Exon       | 0,14 |
| TC0300002901.mm.1 | 2,52 Ank2; Gm4392  | PSR0300022992.mm.1 | -2,52  | 0,014979 | 0,452048 Alternative 5' Donc | 0,13 |
| TC0300002901.mm.1 | 2,52 Ank2; Gm4392  | PSR0300023011.mm.1 | -2,63  | 0,018879 | 0,471134 Alternative 5' Donc | 0,15 |
| TC0300002901.mm.1 | 2,52 Ank2; Gm4392  | PSR0300022989.mm.1 | -2,67  | 0,022344 | 0,486348 Alternative 5' Donc | 0,13 |
| TC0300002901.mm.1 | 2,52 Ank2; Gm4392  | JUC0300012010.mm.1 | -3,14  | 0,023799 | 0,491893                     |      |
| TC0300002901.mm.1 | 2,52 Ank2; Gm4392  | PSR0300023010.mm.1 | -3,15  | 0,04079  | 0,543185 Alternative 5' Donc | 0,15 |
| TC0300002901.mm.1 | 2,52 Ank2; Gm4392  | JUC0300011982.mm.1 | -3,31  | 0,010768 | 0,423955                     |      |
| TC0300002901.mm.1 | 2,52 Ank2; Gm4392  | PSR0300022908.mm.1 | -3,4   | 0,045543 | 0,554382 Cassette Exon       | 0,3  |
| TC0300002901.mm.1 | 2,52 Ank2; Gm4392  | PSR0300023012.mm.1 | -3,44  | 0,005933 | 0,384945 Alternative 5' Donc | 0,15 |
| TC0300002901.mm.1 | 2,52 Ank2; Gm4392  | JUC0300012000.mm.1 | -4,13  | 0,023017 | 0,489186                     |      |
| TC0300002901.mm.1 | 2,52 Ank2; Gm4392  | JUC0300011997.mm.1 | -4,36  | 0,000033 | 0,238339                     |      |
| TC0300002901.mm.1 | 2,52 Ank2; Gm4392  | JUC0300011998.mm.1 | -4,94  | 0,010676 | 0,423096                     |      |
| TC0300002901.mm.1 | 2,52 Ank2; Gm4392  | PSR0300023007.mm.1 | -8,14  | 0,005757 | 0,383101 Alternative 5' Donc | 0,37 |
| TC0400000015.mm.1 | -1,89 Lyn; Gm11787 | JUC0400000041.mm.1 | 5,87   | 0,017859 | 0,466232                     |      |
| TC1600001540.mm.1 | 2,8 E130310I04Rik  | JUC1600006602.mm.1 | 5,86   | 0,000234 | 0,28803                      |      |
| TC1600001540.mm.1 | 2,8 E130310I04Rik  | PSR1600012668.mm.1 | 2,25   | 0,02163  | 0,483552 Cassette Exon       | 0,25 |
| TC1600001540.mm.1 | 2,8 E130310I04Rik  | PSR1600012669.mm.1 | -2,72  | 0,000741 | 0,307808 Cassette Exon       | 0,16 |
| TC1600001540.mm.1 | 2,8 E130310I04Rik  | PSR1600012665.mm.1 | -3,16  | 0,011947 | 0,431753 Cassette Exon       | 0,2  |

|                   |              |                    |       |          |                              |      |
|-------------------|--------------|--------------------|-------|----------|------------------------------|------|
| TC0900002706.mm.1 | -1,71        | JUC0900012534.mm.1 | 5,86  | 0,005347 | 0,378286                     |      |
| TC0500000096.mm.1 | 2,57 Pclo    | PSR0500000843.mm.1 | 5,85  | 0,012412 | 0,435192 Cassette Exon       | 0,46 |
| TC0500000096.mm.1 | 2,57 Pclo    | JUC0500000488.mm.1 | 5,7   | 0,000739 | 0,307808                     |      |
| TC0500000096.mm.1 | 2,57 Pclo    | JUC0500000491.mm.1 | 2,15  | 0,000267 | 0,28803                      |      |
| TC0500000096.mm.1 | 2,57 Pclo    | PSR0500000853.mm.1 | -2,32 | 0,007762 | 0,402774 Cassette Exon       | 0,39 |
| TC0500000096.mm.1 | 2,57 Pclo    | PSR0500000821.mm.1 | -2,36 | 0,003817 | 0,35811 Cassette Exon        | 0,14 |
| TC0500000096.mm.1 | 2,57 Pclo    | PSR0500000854.mm.1 | -2,43 | 0,006346 | 0,389463 Cassette Exon       | 0,27 |
| TC0500000096.mm.1 | 2,57 Pclo    | PSR0500000856.mm.1 | -2,69 | 0,000768 | 0,308403 Cassette Exon       | 0,16 |
| TC0500000096.mm.1 | 2,57 Pclo    | PSR0500000822.mm.1 | -2,93 | 0,049555 | 0,563325 Cassette Exon       | 0,17 |
| TC0500000096.mm.1 | 2,57 Pclo    | PSR0500000855.mm.1 | -2,96 | 0,028778 | 0,508148 Cassette Exon       | 0,18 |
| TC0500000096.mm.1 | 2,57 Pclo    | JUC0500000500.mm.1 | -3,05 | 0,001572 | 0,331411                     |      |
| TC0500000096.mm.1 | 2,57 Pclo    | JUC0500000476.mm.1 | -3,24 | 0,028151 | 0,506347                     |      |
| TC0500000096.mm.1 | 2,57 Pclo    | JUC0500000492.mm.1 | -4,05 | 0,012082 | 0,43255                      |      |
| TC0500000096.mm.1 | 2,57 Pclo    | JUC0500000497.mm.1 | -4,87 | 0,007799 | 0,403089                     |      |
| TC0500000096.mm.1 | 2,57 Pclo    | JUC0500000493.mm.1 | -6,28 | 0,018206 | 0,467586                     |      |
| TC1200000019.mm.1 | 1,2          | PSR1200000291.mm.1 | 5,85  | 0,001749 | 0,335996 Alternative 3' Acce | 0,44 |
| TC1200000019.mm.1 | 1,2          | PSR1200000290.mm.1 | 5,36  | 0,003079 | 0,353892 Alternative 3' Acce | 0,44 |
| TC1200000019.mm.1 | 1,2          | PSR1200000301.mm.1 | 2,75  | 0,031454 | 0,516773 Alternative 5' Donc | 0,22 |
| TC0200003666.mm.1 | 1,48 Scn3a   | JUC0200015850.mm.1 | 5,85  | 0,000036 | 0,238339                     |      |
| TC0200003666.mm.1 | 1,48 Scn3a   | JUC0200015875.mm.1 | 5,04  | 0,001282 | 0,322251                     |      |
| TC0200003666.mm.1 | 1,48 Scn3a   | JUC0200015852.mm.1 | 4,29  | 0,001806 | 0,336311                     |      |
| TC0200003666.mm.1 | 1,48 Scn3a   | JUC0200015851.mm.1 | 4,09  | 0,004136 | 0,3623                       |      |
| TC0200003666.mm.1 | 1,48 Scn3a   | PSR0200031243.mm.1 | 3,56  | 0,046037 | 0,555624 Cassette Exon       | 0,29 |
| TC0200003666.mm.1 | 1,48 Scn3a   | JUC0200015876.mm.1 | 3,35  | 0,015697 | 0,455416                     |      |
| TC0200003666.mm.1 | 1,48 Scn3a   | PSR0200031208.mm.1 | 3,05  | 0,009684 | 0,417605 Cassette Exon       | 0,38 |
| TC0200003666.mm.1 | 1,48 Scn3a   | PSR0200031236.mm.1 | 2,83  | 0,006517 | 0,391382 Cassette Exon       | 0,17 |
| TC0200003666.mm.1 | 1,48 Scn3a   | PSR0200031213.mm.1 | 2,53  | 0,000404 | 0,297771 Cassette Exon       | 0,05 |
| TC0200003666.mm.1 | 1,48 Scn3a   | PSR0200031224.mm.1 | -2,15 | 0,033643 | 0,523479 Alternative 5' Donc | 0,14 |
| TC0200003666.mm.1 | 1,48 Scn3a   | PSR0200031249.mm.1 | -2,44 | 0,026653 | 0,501823 Alternative 5' Donc | 0,23 |
| TC0200003666.mm.1 | 1,48 Scn3a   | PSR0200031220.mm.1 | -2,46 | 0,006356 | 0,389469 Alternative 3' Acce | 0,23 |
| TC0200003666.mm.1 | 1,48 Scn3a   | PSR0200031221.mm.1 | -2,67 | 0,042724 | 0,548097 Alternative 3' Acce | 0,25 |
| TC0X00002983.mm.1 | -2,69 Tspan6 | JUC0X00009352.mm.1 | 5,85  | 0,003279 | 0,354243                     |      |
| TC0X00002983.mm.1 | -2,69 Tspan6 | PSR0X00018539.mm.1 | 2,18  | 0,000537 | 0,304044 Cassette Exon       | 0,11 |
| TC0600002519.mm.1 | 2,18 Ctnna2  | JUC0600010191.mm.1 | 5,84  | 0,034545 | 0,525975                     |      |
| TC0600002519.mm.1 | 2,18 Ctnna2  | PSR0600019565.mm.1 | 3,53  | 0,002161 | 0,344238 Cassette Exon       | 0,32 |
| TC0600002519.mm.1 | 2,18 Ctnna2  | JUC0600010194.mm.1 | 3,12  | 0,006192 | 0,387873                     |      |
| TC0600002519.mm.1 | 2,18 Ctnna2  | JUC0600010182.mm.1 | 2,34  | 0,044856 | 0,5526                       |      |
| TC0600002519.mm.1 | 2,18 Ctnna2  | PSR0600019569.mm.1 | -2,01 | 0,031988 | 0,518264 Cassette Exon       | 0,1  |
| TC0600002519.mm.1 | 2,18 Ctnna2  | PSR0600019548.mm.1 | -2,13 | 0,021978 | 0,485125 Cassette Exon       | 0,14 |
| TC0600002519.mm.1 | 2,18 Ctnna2  | PSR0600019573.mm.1 | -2,18 | 0,024114 | 0,49322 Cassette Exon        | 0,1  |
| TC0600002519.mm.1 | 2,18 Ctnna2  | JUC0600010177.mm.1 | -2,34 | 0,019239 | 0,473019                     |      |
| TC1300001474.mm.1 | 2,7 Hecw1    | JUC1300004945.mm.1 | 5,84  | 0,000162 | 0,272566                     |      |
| TC1300001474.mm.1 | 2,7 Hecw1    | PSR1300009432.mm.1 | 2,84  | 0,000245 | 0,28803 Cassette Exon        | 0,25 |
| TC1300001474.mm.1 | 2,7 Hecw1    | PSR1300009415.mm.1 | 2,23  | 0,037955 | 0,535303 Cassette Exon       | 0,2  |
| TC1300001474.mm.1 | 2,7 Hecw1    | JUC1300004941.mm.1 | 2,23  | 0,049188 | 0,562431                     |      |
| TC1300001474.mm.1 | 2,7 Hecw1    | PSR1300009411.mm.1 | 2,05  | 0,000112 | 0,267977 Cassette Exon       | 0,07 |
| TC1300001474.mm.1 | 2,7 Hecw1    | PSR1300009418.mm.1 | -2,03 | 0,004608 | 0,369794 Cassette Exon       | 0,12 |
| TC1300001474.mm.1 | 2,7 Hecw1    | PSR1300009425.mm.1 | -2,03 | 0,007454 | 0,400326 Alternative 3' Acce | 0,1  |

|                   |               |                    |       |          |                              |      |
|-------------------|---------------|--------------------|-------|----------|------------------------------|------|
| TC1300001474.mm.1 | 2,7 Hecw1     | PSR1300009403.mm.1 | -2,43 | 0,007593 | 0,401712 Alternative 3' Acce | 0,15 |
| TC1300001474.mm.1 | 2,7 Hecw1     | PSR1300009409.mm.1 | -2,44 | 0,034343 | 0,525546 Cassette Exon       | 0,12 |
| TC1300001474.mm.1 | 2,7 Hecw1     | PSR1300009438.mm.1 | -2,46 | 0,015997 | 0,45699 Alternative 5' Donc  | 0,15 |
| TC1300001474.mm.1 | 2,7 Hecw1     | JUC1300004942.mm.1 | -2,74 | 0,019889 | 0,475806                     |      |
| TC1300001474.mm.1 | 2,7 Hecw1     | JUC1300004949.mm.1 | -3,38 | 0,00586  | 0,383791                     |      |
| TC0200003682.mm.1 | 1,08 Scn7a    | JUC0200016003.mm.1 | 5,83  | 0,032472 | 0,519632                     |      |
| TC0200003682.mm.1 | 1,08 Scn7a    | JUC0200016015.mm.1 | 3,22  | 0,041234 | 0,544134                     |      |
| TC1100000058.mm.1 | 1,27 Ap1b1    | JUC1100000342.mm.1 | 5,82  | 0,026106 | 0,499897                     |      |
| TC1100000058.mm.1 | 1,27 Ap1b1    | JUC1100000343.mm.1 | 3,42  | 0,049986 | 0,564087                     |      |
| TC1100000058.mm.1 | 1,27 Ap1b1    | JUC1100000354.mm.1 | -3,13 | 0,038422 | 0,536405                     |      |
| TC0X00000525.mm.1 | -1,86 Fhl1    | JUC0X00001771.mm.1 | 5,81  | 0,046618 | 0,556809                     |      |
| TC0X00000525.mm.1 | -1,86 Fhl1    | JUC0X00001772.mm.1 | 4,52  | 0,010934 | 0,424893                     |      |
| TC0X00000525.mm.1 | -1,86 Fhl1    | JUC0X00001775.mm.1 | 2,82  | 0,04862  | 0,56119                      |      |
| TC0X00000525.mm.1 | -1,86 Fhl1    | PSR0X00003465.mm.1 | 2,39  | 0,02007  | 0,476558 Cassette Exon       | 0,11 |
| TC0X00000525.mm.1 | -1,86 Fhl1    | JUC0X00001764.mm.1 | 2,16  | 0,03715  | 0,533065                     |      |
| TC1500000875.mm.1 | 1,66 Mapk8ip2 | JUC1500003880.mm.1 | 5,8   | 0,006928 | 0,395156                     |      |
| TC1500000875.mm.1 | 1,66 Mapk8ip2 | PSR1500006924.mm.1 | 2,67  | 0,021011 | 0,480143 Cassette Exon       | 0,31 |
| TC1500000875.mm.1 | 1,66 Mapk8ip2 | PSR1500006928.mm.1 | 2,03  | 0,027513 | 0,504313 Cassette Exon       | 0,06 |
| TC1500000875.mm.1 | 1,66 Mapk8ip2 | PSR1500006934.mm.1 | 2,01  | 0,002987 | 0,35265 Alternative 5' Donc  | 0,12 |
| TC1500000875.mm.1 | 1,66 Mapk8ip2 | PSR1500006919.mm.1 | -2,02 | 0,02707  | 0,502979 Alternative 3' Acce | 0,11 |
| TC1500000875.mm.1 | 1,66 Mapk8ip2 | PSR1500006921.mm.1 | -3,14 | 0,010842 | 0,424161 Alternative 3' Acce | 0,34 |
| TC1600001209.mm.1 | -1,33 Zc3h7a  | JUC1600005029.mm.1 | 5,79  | 0,044136 | 0,551024                     |      |
| TC0500000422.mm.1 | 3,96 Crmp1    | JUC0500002345.mm.1 | 5,76  | 0,000603 | 0,304044                     |      |
| TC0500000422.mm.1 | 3,96 Crmp1    | JUC0500002350.mm.1 | 5,37  | 0,008347 | 0,406435                     |      |
| TC0500000422.mm.1 | 3,96 Crmp1    | PSR0500004190.mm.1 | 2,78  | 0,002626 | 0,349612 Cassette Exon       | 0,23 |
| TC0500000422.mm.1 | 3,96 Crmp1    | PSR0500004201.mm.1 | 2,34  | 0,007253 | 0,39826 Cassette Exon        | 0,01 |
| TC0500000422.mm.1 | 3,96 Crmp1    | PSR0500004193.mm.1 | 2,2   | 0,000284 | 0,28803                      |      |
| TC0500000422.mm.1 | 3,96 Crmp1    | JUC0500002352.mm.1 | 2,15  | 0,024188 | 0,493294                     |      |
| TC0500000422.mm.1 | 3,96 Crmp1    | JUC0500002348.mm.1 | -2,01 | 0,009284 | 0,414799                     |      |
| TC0500000422.mm.1 | 3,96 Crmp1    | PSR0500004192.mm.1 | -2,14 | 0,009622 | 0,417315 Cassette Exon       | 0,11 |
| TC0500000422.mm.1 | 3,96 Crmp1    | PSR0500004189.mm.1 | -2,22 | 0,029058 | 0,508962 Cassette Exon       | 0,09 |
| TC0500000422.mm.1 | 3,96 Crmp1    | JUC0500002354.mm.1 | -2,99 | 0,012152 | 0,432901                     |      |
| TC0500000422.mm.1 | 3,96 Crmp1    | PSR0500004186.mm.1 | -3,3  | 0,011355 | 0,427374 Cassette Exon       | 0,35 |
| TC0500000422.mm.1 | 3,96 Crmp1    | PSR0500004183.mm.1 | -3,85 | 0,008052 | 0,404416 Cassette Exon       | 0,26 |
| TC0500000422.mm.1 | 3,96 Crmp1    | PSR0500004184.mm.1 | -4,49 | 0,014909 | 0,451803 Cassette Exon       | 0,35 |
| TC0500000422.mm.1 | 3,96 Crmp1    | PSR0500004197.mm.1 | -4,72 | 0,002221 | 0,345773 Alternative 5' Donc | 0,42 |
| TC0500000422.mm.1 | 3,96 Crmp1    | JUC0500002346.mm.1 | -5,13 | 0,012288 | 0,434238                     |      |
| TC0500000422.mm.1 | 3,96 Crmp1    | PSR0500004207.mm.1 | -6,49 | 0,023513 | 0,490947 Alternative 5' Donc | 0,45 |
| TC0500000422.mm.1 | 3,96 Crmp1    | PSR0500004185.mm.1 | -7,44 | 0,006304 | 0,389124 Cassette Exon       | 0,35 |
| TC0500000422.mm.1 | 3,96 Crmp1    | PSR0500004195.mm.1 | -7,55 | 0,015659 | 0,455364 Alternative 3' Acce | 0,48 |
| TC0500000422.mm.1 | 3,96 Crmp1    | JUC0500002353.mm.1 | -9    | 0,004117 | 0,3623                       |      |
| TC0500000248.mm.1 | 4,06 Dpp6     | JUC0500001085.mm.1 | 5,75  | 0,001805 | 0,336311                     |      |
| TC0500000248.mm.1 | 4,06 Dpp6     | PSR0500001890.mm.1 | 3,57  | 0,000375 | 0,291955 Cassette Exon       | 0,25 |
| TC0500000248.mm.1 | 4,06 Dpp6     | JUC0500001086.mm.1 | 3,05  | 0,00267  | 0,349612                     |      |
| TC0500000248.mm.1 | 4,06 Dpp6     | JUC0500001070.mm.1 | 3,04  | 0,003164 | 0,353901                     |      |
| TC0500000248.mm.1 | 4,06 Dpp6     | PSR0500001910.mm.1 | 2,98  | 0,001901 | 0,338712 Cassette Exon       | 0,41 |
| TC0500000248.mm.1 | 4,06 Dpp6     | PSR0500001905.mm.1 | 2,84  | 0,007181 | 0,397855 Cassette Exon       | 0,17 |
| TC0500000248.mm.1 | 4,06 Dpp6     | PSR0500001912.mm.1 | 2,48  | 0,002083 | 0,342452 Cassette Exon       | 0,02 |

|                   |                     |                     |       |          |                              |      |
|-------------------|---------------------|---------------------|-------|----------|------------------------------|------|
| TC0500000248.mm.1 | 4,06 Dpp6           | JUC0500001083.mm.1  | 2,41  | 0,007902 | 0,403819                     |      |
| TC0500000248.mm.1 | 4,06 Dpp6           | JUC0500001090.mm.1  | 2,3   | 0,000677 | 0,304338                     |      |
| TC0500000248.mm.1 | 4,06 Dpp6           | PSR0500001892.mm.1  | -2,2  | 0,008378 | 0,4065 Cassette Exon         | 0,01 |
| TC0500000248.mm.1 | 4,06 Dpp6           | PSR0500001895.mm.1  | -2,31 | 0,003246 | 0,354243 Cassette Exon       | 0,09 |
| TC0500000248.mm.1 | 4,06 Dpp6           | PSR0500001917.mm.1  | -2,4  | 0,035006 | 0,527412 Alternative 5' Donc | 0,22 |
| TC0500000248.mm.1 | 4,06 Dpp6           | PSR0500001900.mm.1  | -2,46 | 0,012902 | 0,438213 Cassette Exon       | 0,08 |
| TC0500000248.mm.1 | 4,06 Dpp6           | PSR0500001908.mm.1  | -2,63 | 0,004408 | 0,366753 Cassette Exon       | 0,09 |
| TC0500000248.mm.1 | 4,06 Dpp6           | PSR0500001909.mm.1  | -2,78 | 0,000781 | 0,309885 Cassette Exon       | 0,03 |
| TC0500000248.mm.1 | 4,06 Dpp6           | PSR0500001880.mm.1  | -2,87 | 0,009778 | 0,417839 Cassette Exon       | 0,01 |
| TC0500000248.mm.1 | 4,06 Dpp6           | JUC0500001092.mm.1  | -3,27 | 0,017609 | 0,464312                     |      |
| TC0500000248.mm.1 | 4,06 Dpp6           | PSR0500001893.mm.1  | -3,53 | 0,008634 | 0,408463 Cassette Exon       | 0,37 |
| TC0500000248.mm.1 | 4,06 Dpp6           | PSR0500001885.mm.1  | -3,57 | 0,002193 | 0,344674 Cassette Exon       | 0,25 |
| TC0500000248.mm.1 | 4,06 Dpp6           | PSR0500001881.mm.1  | -3,67 | 0,008207 | 0,405909 Cassette Exon       | 0,18 |
| TC0500000248.mm.1 | 4,06 Dpp6           | PSR0500001891.mm.1  | -3,75 | 0,004131 | 0,3623 Alternative 5' Donc   | 0,45 |
| TC0500000248.mm.1 | 4,06 Dpp6           | PSR0500001878.mm.1  | -3,82 | 0,025306 | 0,49723 Cassette Exon        | 0,06 |
| TC0500000248.mm.1 | 4,06 Dpp6           | PSR0500001884.mm.1  | -4,06 | 0,002164 | 0,344238 Cassette Exon       | 0,25 |
| TC0500000248.mm.1 | 4,06 Dpp6           | PSR0500001899.mm.1  | -4,14 | 0,002031 | 0,341377 Cassette Exon       | 0,24 |
| TC0500000248.mm.1 | 4,06 Dpp6           | PSR0500001883.mm.1  | -4,61 | 0,004181 | 0,362631 Cassette Exon       | 0,25 |
| TC0500000248.mm.1 | 4,06 Dpp6           | PSR0500001882.mm.1  | -4,62 | 0,012077 | 0,43255 Cassette Exon        | 0,18 |
| TC0500000248.mm.1 | 4,06 Dpp6           | JUC0500001087.mm.1  | -4,75 | 0,004209 | 0,363236                     |      |
| TC0500000248.mm.1 | 4,06 Dpp6           | PSR0500001876.mm.1  | -5    | 0,001906 | 0,338854 Cassette Exon       | 0,28 |
| TC0500000248.mm.1 | 4,06 Dpp6           | JUC0500001091.mm.1  | -5,24 | 0,002118 | 0,342919                     |      |
| TC0500000248.mm.1 | 4,06 Dpp6           | JUC0500001078.mm.1  | -5,49 | 0,003727 | 0,357586                     |      |
| TC0500000248.mm.1 | 4,06 Dpp6           | PSR0500001906.mm.1  | -5,64 | 0,002376 | 0,34829 Alternative 5' Donc  | 0,48 |
| TC0500000248.mm.1 | 4,06 Dpp6           | JUC0500001093.mm.1  | -5,67 | 0,00118  | 0,319954                     |      |
| TC0500000248.mm.1 | 4,06 Dpp6           | PSR0500001879.mm.1  | -5,8  | 0,007997 | 0,403853 Cassette Exon       | 0,07 |
| TC0500000248.mm.1 | 4,06 Dpp6           | JUC0500001066.mm.1  | -5,83 | 0,004364 | 0,365487                     |      |
| TC0500000248.mm.1 | 4,06 Dpp6           | PSR0500001875.mm.1  | -6,93 | 0,002399 | 0,348564 Cassette Exon       | 0,28 |
| TC0500000248.mm.1 | 4,06 Dpp6           | JUC0500001094.mm.1  | -7,74 | 0,003055 | 0,353892                     |      |
| TC0500000248.mm.1 | 4,06 Dpp6           | JUC0500001095.mm.1  | -8,6  | 0,003011 | 0,353447                     |      |
| TC1100004187.mm.1 | 1,89 Nptx1          | JUC11000020911.mm.1 | 5,75  | 0,007992 | 0,403853                     |      |
| TC1100004187.mm.1 | 1,89 Nptx1          | PSR11000039778.mm.1 | 5,23  | 0,008263 | 0,405976 Alternative 3' Acce | 0,46 |
| TC1200000636.mm.1 | -1,3 Mnat1          | PSR1200004387.mm.1  | 5,75  | 0,040144 | 0,541609 Alternative 5' Donc | 0,4  |
| TC1900000954.mm.1 | -1,46 Pacs1         | JUC1900004648.mm.1  | 5,74  | 0,006564 | 0,39213                      |      |
| TC1400002723.mm.1 | 1,22 Ugg2           | PSR14000020226.mm.1 | 5,73  | 0,033669 | 0,523549 Alternative 3' Acce | 0,54 |
| TC1400002723.mm.1 | 1,22 Ugg2           | JUC14000011135.mm.1 | -2,37 | 0,011779 | 0,430069                     |      |
| TC0300002337.mm.1 | 1,25 Hcn3           | JUC0300009346.mm.1  | 5,73  | 0,006175 | 0,387873                     |      |
| TC0300002337.mm.1 | 1,25 Hcn3           | JUC0300009351.mm.1  | -2,61 | 0,033786 | 0,523767                     |      |
| TC0300002212.mm.1 | 1,52 Glrb           | JUC0300008732.mm.1  | 5,72  | 0,014713 | 0,45037                      |      |
| TC0300002212.mm.1 | 1,52 Glrb           | PSR03000016627.mm.1 | -3,15 | 0,009291 | 0,414812 Cassette Exon       | 0,25 |
| TC0500001128.mm.1 | -1,01 Zfp932        | JUC0500005225.mm.1  | 5,71  | 0,002907 | 0,352262                     |      |
| TC0500001128.mm.1 | -1,01 Zfp932        | PSR0500009597.mm.1  | 2,12  | 0,002863 | 0,352207 Cassette Exon       | 0,28 |
| TC1700001322.mm.1 | 1,03 Ppp1r21        | JUC1700006587.mm.1  | 5,69  | 0,022167 | 0,485712                     |      |
| TC1700001322.mm.1 | 1,03 Ppp1r21        | JUC1700006589.mm.1  | -2,65 | 0,019047 | 0,471941                     |      |
| TC0700002065.mm.1 | 5,46 Brsk2; Mir3104 | PSR07000018549.mm.1 | 5,67  | 0,001232 | 0,322251 Cassette Exon       | 0,11 |
| TC0700002065.mm.1 | 5,46 Brsk2; Mir3104 | JUC0700009868.mm.1  | 3,32  | 0,003378 | 0,354303                     |      |
| TC0700002065.mm.1 | 5,46 Brsk2; Mir3104 | JUC0700009887.mm.1  | 3,2   | 0,001367 | 0,32572                      |      |
| TC0700002065.mm.1 | 5,46 Brsk2; Mir3104 | PSR07000018558.mm.1 | 3,01  | 0,021114 | 0,480564                     |      |



|                   |                     |                    |        |          |                              |      |
|-------------------|---------------------|--------------------|--------|----------|------------------------------|------|
| TC0700002065.mm.1 | 5,46 Brsk2; Mir3104 | PSR0700018541.mm.1 | 2,63   | 0,003414 | 0,355257 Cassette Exon       | 0,02 |
| TC0700002065.mm.1 | 5,46 Brsk2; Mir3104 | PSR0700018578.mm.1 | -2,06  | 0,025408 | 0,497403                     |      |
| TC0700002065.mm.1 | 5,46 Brsk2; Mir3104 | JUC0700009879.mm.1 | -2,12  | 0,00054  | 0,304044                     |      |
| TC0700002065.mm.1 | 5,46 Brsk2; Mir3104 | PSR0700018566.mm.1 | -2,17  | 0,024636 | 0,49468 Cassette Exon        | 0,25 |
| TC0700002065.mm.1 | 5,46 Brsk2; Mir3104 | JUC0700009873.mm.1 | -2,23  | 0,016641 | 0,459985                     |      |
| TC0700002065.mm.1 | 5,46 Brsk2; Mir3104 | JUC0700009892.mm.1 | -2,37  | 0,014358 | 0,448293                     |      |
| TC0700002065.mm.1 | 5,46 Brsk2; Mir3104 | JUC0700009885.mm.1 | -2,44  | 0,048469 | 0,560864                     |      |
| TC0700002065.mm.1 | 5,46 Brsk2; Mir3104 | PSR0700018582.mm.1 | -2,78  | 0,000883 | 0,312378                     |      |
| TC0700002065.mm.1 | 5,46 Brsk2; Mir3104 | PSR0700018577.mm.1 | -2,86  | 0,007786 | 0,402902                     |      |
| TC0700002065.mm.1 | 5,46 Brsk2; Mir3104 | PSR0700018568.mm.1 | -3,22  | 0,003543 | 0,3562 Cassette Exon         | 0,14 |
| TC0700002065.mm.1 | 5,46 Brsk2; Mir3104 | PSR0700018572.mm.1 | -3,3   | 0,033613 | 0,523309 Cassette Exon       | 0,25 |
| TC0700002065.mm.1 | 5,46 Brsk2; Mir3104 | PSR0700018574.mm.1 | -3,34  | 0,00868  | 0,408815 Alternative 3' Acce | 0,07 |
| TC0700002065.mm.1 | 5,46 Brsk2; Mir3104 | PSR0700018581.mm.1 | -3,57  | 0,007133 | 0,397304                     |      |
| TC0700002065.mm.1 | 5,46 Brsk2; Mir3104 | PSR0700018575.mm.1 | -3,75  | 0,00799  | 0,403853 Alternative 3' Acce | 0,07 |
| TC0700002065.mm.1 | 5,46 Brsk2; Mir3104 | JUC0700009891.mm.1 | -3,95  | 0,002598 | 0,349501                     |      |
| TC0700002065.mm.1 | 5,46 Brsk2; Mir3104 | JUC0700009895.mm.1 | -4,04  | 0,044175 | 0,551087                     |      |
| TC0700002065.mm.1 | 5,46 Brsk2; Mir3104 | JUC0700009865.mm.1 | -4,33  | 0,000952 | 0,313363                     |      |
| TC0700002065.mm.1 | 5,46 Brsk2; Mir3104 | JUC0700009875.mm.1 | -4,46  | 0,008035 | 0,40434                      |      |
| TC0700002065.mm.1 | 5,46 Brsk2; Mir3104 | JUC0700009893.mm.1 | -4,54  | 0,003281 | 0,354243                     |      |
| TC0700002065.mm.1 | 5,46 Brsk2; Mir3104 | JUC0700009890.mm.1 | -4,59  | 0,020058 | 0,476514                     |      |
| TC0700002065.mm.1 | 5,46 Brsk2; Mir3104 | PSR0700018585.mm.1 | -4,68  | 0,000322 | 0,288663                     |      |
| TC0700002065.mm.1 | 5,46 Brsk2; Mir3104 | PSR0700018589.mm.1 | -4,72  | 0,002884 | 0,352207                     |      |
| TC0700002065.mm.1 | 5,46 Brsk2; Mir3104 | PSR0700018540.mm.1 | -4,73  | 0,011409 | 0,427568 Cassette Exon       | 0,41 |
| TC0700002065.mm.1 | 5,46 Brsk2; Mir3104 | PSR0700018587.mm.1 | -4,8   | 0,000615 | 0,304044                     |      |
| TC0700002065.mm.1 | 5,46 Brsk2; Mir3104 | PSR0700018588.mm.1 | -4,86  | 0,002647 | 0,349612                     |      |
| TC0700002065.mm.1 | 5,46 Brsk2; Mir3104 | JUC0700009878.mm.1 | -5,05  | 0,000268 | 0,28803                      |      |
| TC0700002065.mm.1 | 5,46 Brsk2; Mir3104 | PSR0700018586.mm.1 | -5,09  | 0,002372 | 0,34829                      |      |
| TC0700002065.mm.1 | 5,46 Brsk2; Mir3104 | PSR0700018536.mm.1 | -5,75  | 0,002145 | 0,343679 Cassette Exon       | 0,41 |
| TC0700002065.mm.1 | 5,46 Brsk2; Mir3104 | PSR0700018537.mm.1 | -5,79  | 0,001804 | 0,336311 Cassette Exon       | 0,41 |
| TC0700002065.mm.1 | 5,46 Brsk2; Mir3104 | PSR0700018569.mm.1 | -5,99  | 0,001863 | 0,337906 Cassette Exon       | 0,47 |
| TC0700002065.mm.1 | 5,46 Brsk2; Mir3104 | PSR0700018565.mm.1 | -6,28  | 0,000302 | 0,288663 Cassette Exon       | 0,43 |
| TC0700002065.mm.1 | 5,46 Brsk2; Mir3104 | JUC0700009898.mm.1 | -6,35  | 0,005816 | 0,383169                     |      |
| TC0700002065.mm.1 | 5,46 Brsk2; Mir3104 | PSR0700018556.mm.1 | -7,11  | 0,000303 | 0,288663 Alternative 3' Acce | 0,16 |
| TC0700002065.mm.1 | 5,46 Brsk2; Mir3104 | JUC0700009882.mm.1 | -7,52  | 0,001515 | 0,330268                     |      |
| TC0700002065.mm.1 | 5,46 Brsk2; Mir3104 | JUC0700009900.mm.1 | -7,78  | 0,003705 | 0,357266                     |      |
| TC0700002065.mm.1 | 5,46 Brsk2; Mir3104 | JUC0700009894.mm.1 | -9,67  | 0,000559 | 0,304044                     |      |
| TC0700002065.mm.1 | 5,46 Brsk2; Mir3104 | JUC0700009867.mm.1 | -10,47 | 0,002879 | 0,352207                     |      |
| TC0700002065.mm.1 | 5,46 Brsk2; Mir3104 | JUC0700009899.mm.1 | -12,37 | 0,000769 | 0,308403                     |      |
| TC0700004265.mm.1 | -1,42 Xpo6          | JUC0700018756.mm.1 | 5,67   | 0,008541 | 0,407996                     |      |
| TC0700004265.mm.1 | -1,42 Xpo6          | PSR0700035510.mm.1 | 4,8    | 0,019512 | 0,474538 Alternative 3' Acce | 0,38 |
| TC0700004265.mm.1 | -1,42 Xpo6          | PSR0700035514.mm.1 | 3,53   | 0,027015 | 0,502979 Alternative 5' Donc | 0,31 |
| TC0700004265.mm.1 | -1,42 Xpo6          | PSR0700035513.mm.1 | 3,4    | 0,026762 | 0,502102 Alternative 5' Donc | 0,31 |
| TC0700004265.mm.1 | -1,42 Xpo6          | PSR0700035512.mm.1 | 3,37   | 0,018456 | 0,468671 Alternative 5' Donc | 0,31 |
| TC0700004265.mm.1 | -1,42 Xpo6          | PSR0700035509.mm.1 | 3,14   | 0,014992 | 0,452052 Cassette Exon       | 0,31 |
| TC0700004265.mm.1 | -1,42 Xpo6          | JUC0700018744.mm.1 | 2,89   | 0,017989 | 0,466929                     |      |
| TC0400002613.mm.1 | 1,6 Alg2            | JUC0400011069.mm.1 | 5,67   | 0,029218 | 0,509521                     |      |
| TC0400002613.mm.1 | 1,6 Alg2            | PSR0400021341.mm.1 | -2,13  | 0,01018  | 0,419711 Cassette Exon       | 0,05 |
| TC0400002613.mm.1 | 1,6 Alg2            | JUC0400011070.mm.1 | -2,79  | 0,045465 | 0,554267                     |      |

|                   |                |                    |        |          |                              |      |
|-------------------|----------------|--------------------|--------|----------|------------------------------|------|
| TC0400001715.mm.1 | 1,26 Eif4g3    | JUC0400007254.mm.1 | 5,66   | 0,029297 | 0,509874                     |      |
| TC0400001715.mm.1 | 1,26 Eif4g3    | JUC0400007293.mm.1 | 2,99   | 0,030225 | 0,512452                     |      |
| TC1100000120.mm.1 | -1,07 Abca13   | PSR1100001270.mm.1 | 5,65   | 0,013546 | 0,44358 Cassette Exon        | 0,32 |
| TC1100000120.mm.1 | -1,07 Abca13   | JUC1100000702.mm.1 | 5,07   | 0,000212 | 0,28803                      |      |
| TC1100000120.mm.1 | -1,07 Abca13   | PSR1100001274.mm.1 | 4,99   | 0,011949 | 0,431753 Cassette Exon       | 0,42 |
| TC1100000120.mm.1 | -1,07 Abca13   | PSR1100001275.mm.1 | 4,66   | 0,014742 | 0,450615 Cassette Exon       | 0,5  |
| TC1100000120.mm.1 | -1,07 Abca13   | JUC1100000699.mm.1 | 4,5    | 0,030188 | 0,512365                     |      |
| TC1100000120.mm.1 | -1,07 Abca13   | JUC1100000698.mm.1 | 4,48   | 0,011716 | 0,429969                     |      |
| TC1100000120.mm.1 | -1,07 Abca13   | PSR1100001276.mm.1 | 3,95   | 0,019666 | 0,474887 Cassette Exon       | 0,41 |
| TC1100000120.mm.1 | -1,07 Abca13   | PSR1100001272.mm.1 | 2,87   | 0,039405 | 0,539557 Cassette Exon       | 0,44 |
| TC1100000120.mm.1 | -1,07 Abca13   | JUC1100000700.mm.1 | 2,13   | 0,049055 | 0,562009                     |      |
| TC1100000120.mm.1 | -1,07 Abca13   | PSR1100001273.mm.1 | 2,04   | 0,049733 | 0,563552 Cassette Exon       | 0,28 |
| TC1100000120.mm.1 | -1,07 Abca13   | JUC1100000695.mm.1 | 2,04   | 0,046824 | 0,557135                     |      |
| TC1100000120.mm.1 | -1,07 Abca13   | JUC1100000703.mm.1 | -2,24  | 0,028911 | 0,50858                      |      |
| TC0900002681.mm.1 | 9,05 Scg3      | JUC0900012436.mm.1 | 5,63   | 0,019564 | 0,474636                     |      |
| TC0900002681.mm.1 | 9,05 Scg3      | PSR0900022187.mm.1 | -4,45  | 0,024924 | 0,4958 Cassette Exon         | 0,28 |
| TC0900002681.mm.1 | 9,05 Scg3      | PSR0900022174.mm.1 | -12,72 | 0,00898  | 0,411895 Alternative 3' Acce | 0,48 |
| TC0900002681.mm.1 | 9,05 Scg3      | JUC0900012430.mm.1 | -16,03 | 0,001789 | 0,336311                     |      |
| TC0300000878.mm.1 | 1,04 Pogz      | JUC0300003530.mm.1 | 5,63   | 0,043223 | 0,549043                     |      |
| TC0500000750.mm.1 | 1,9 Lphn3      | JUC0500003716.mm.1 | 5,62   | 0,005772 | 0,383104                     |      |
| TC0500000750.mm.1 | 1,9 Lphn3      | JUC0500003696.mm.1 | 4      | 0,0126   | 0,435933                     |      |
| TC0500000750.mm.1 | 1,9 Lphn3      | JUC0500003710.mm.1 | 2,42   | 0,040563 | 0,542455                     |      |
| TC0500000750.mm.1 | 1,9 Lphn3      | PSR0500006768.mm.1 | 2,29   | 0,006424 | 0,389915                     |      |
| TC0500000750.mm.1 | 1,9 Lphn3      | JUC0500003685.mm.1 | 2,12   | 0,009135 | 0,413379                     |      |
| TC0500000750.mm.1 | 1,9 Lphn3      | PSR0500006705.mm.1 | -2,03  | 0,030009 | 0,511687 Alternative 3' Acce | 0,08 |
| TC0500000750.mm.1 | 1,9 Lphn3      | PSR0500006727.mm.1 | -2,37  | 0,003824 | 0,358333 Alternative 3' Acce | 0,16 |
| TC0500000750.mm.1 | 1,9 Lphn3      | PSR0500006717.mm.1 | -2,46  | 0,0439   | 0,550649 Alternative 5' Donc | 0,11 |
| TC0500000750.mm.1 | 1,9 Lphn3      | PSR0500006773.mm.1 | -2,48  | 0,007154 | 0,397804 Alternative 5' Donc | 0,14 |
| TC0500000750.mm.1 | 1,9 Lphn3      | PSR0500006713.mm.1 | -2,6   | 0,006056 | 0,386642 Alternative 3' Acce | 0,02 |
| TC0500000750.mm.1 | 1,9 Lphn3      | PSR0500006769.mm.1 | -2,71  | 0,014255 | 0,447947 Alternative 5' Donc | 0,27 |
| TC0500000750.mm.1 | 1,9 Lphn3      | PSR0500006750.mm.1 | -3,08  | 0,008466 | 0,406626 Alternative 5' Donc | 0,27 |
| TC0500000750.mm.1 | 1,9 Lphn3      | PSR0500006718.mm.1 | -3,33  | 0,012595 | 0,435933 Alternative 5' Donc | 0,11 |
| TC0500000750.mm.1 | 1,9 Lphn3      | JUC0500003694.mm.1 | -3,73  | 0,024855 | 0,495511                     |      |
| TC0500000750.mm.1 | 1,9 Lphn3      | JUC0500003717.mm.1 | -4,19  | 0,010509 | 0,422115                     |      |
| TC0500000750.mm.1 | 1,9 Lphn3      | JUC0500003726.mm.1 | -5,76  | 0,002642 | 0,349612                     |      |
| TC0500000750.mm.1 | 1,9 Lphn3      | JUC0500003721.mm.1 | -7,34  | 0,00032  | 0,288663                     |      |
| TC0100002702.mm.1 | -1,12 Slc16a14 | JUC0100012450.mm.1 | 5,62   | 0,005541 | 0,380603                     |      |
| TC0500001355.mm.1 | 1,29 Gm15800   | JUC0500006507.mm.1 | 5,61   | 0,018097 | 0,46716                      |      |
| TC0500001355.mm.1 | 1,29 Gm15800   | JUC0500006501.mm.1 | 2,42   | 0,036975 | 0,532502                     |      |
| TC0500001355.mm.1 | 1,29 Gm15800   | JUC0500006500.mm.1 | 2,16   | 0,048362 | 0,56056                      |      |
| TC0500001355.mm.1 | 1,29 Gm15800   | JUC0500006483.mm.1 | -2,08  | 0,033766 | 0,523689                     |      |
| TC0500001355.mm.1 | 1,29 Gm15800   | PSR0500011892.mm.1 | -2,24  | 0,012982 | 0,439245 Alternative 3' Acce | 0,15 |
| TC1600000266.mm.1 | -1,34 Klhl24   | JUC1600001258.mm.1 | 5,61   | 0,01208  | 0,43255                      |      |
| TC1600000266.mm.1 | -1,34 Klhl24   | JUC1600001256.mm.1 | 3,83   | 0,04047  | 0,542132                     |      |
| TC0500002608.mm.1 | 1,15 Lnx1      | JUC0500012574.mm.1 | 5,6    | 0,030901 | 0,514574                     |      |
| TC0500002608.mm.1 | 1,15 Lnx1      | JUC0500012576.mm.1 | 2,62   | 0,044751 | 0,55234                      |      |
| TC0500002608.mm.1 | 1,15 Lnx1      | JUC0500012567.mm.1 | -2,2   | 0,024716 | 0,494838                     |      |
| TC0600001790.mm.1 | -1,09 Calcr    | JUC0600007404.mm.1 | 5,6    | 0,027432 | 0,50398                      |      |

|                   |              |                    |       |          |                              |      |
|-------------------|--------------|--------------------|-------|----------|------------------------------|------|
| TC1100000324.mm.1 | -1,18 Cpeb4  | JUC1100001457.mm.1 | 5,6   | 0,012383 | 0,434939                     |      |
| TC1100002000.mm.1 | -1,34 Card14 | JUC1100009918.mm.1 | 5,54  | 0,01021  | 0,419916                     |      |
| TC1100002000.mm.1 | -1,34 Card14 | JUC1100009908.mm.1 | 2,59  | 0,004364 | 0,365487                     |      |
| TC1100002000.mm.1 | -1,34 Card14 | JUC1100009925.mm.1 | 2,21  | 0,019029 | 0,471827                     |      |
| TC0200004420.mm.1 | 1,37 Gm14091 | JUC0200018892.mm.1 | 5,53  | 0,000717 | 0,306015                     |      |
| TC0200004420.mm.1 | 1,37 Gm14091 | PSR0200036913.mm.1 | -3,02 | 0,000285 | 0,28803 Cassette Exon        | 0,19 |
| TC1900000656.mm.1 | 1,54 Fam178a | JUC1900003107.mm.1 | 5,53  | 0,010897 | 0,424424                     |      |
| TC0200004369.mm.1 | -4,95 Actc1  | PSR0200036505.mm.1 | 5,52  | 0,045589 | 0,554548 Cassette Exon       | 0,33 |
| TC0200004369.mm.1 | -4,95 Actc1  | JUC0200018684.mm.1 | 2,24  | 0,04257  | 0,548012                     |      |
| TC0200002398.mm.1 | -1,09 Dlgap4 | JUC0200009797.mm.1 | 5,49  | 0,003559 | 0,356223                     |      |
| TC0200002398.mm.1 | -1,09 Dlgap4 | JUC0200009803.mm.1 | 4,9   | 0,014708 | 0,45037                      |      |
| TC0200002398.mm.1 | -1,09 Dlgap4 | PSR0200019333.mm.1 | 3,53  | 0,005692 | 0,382434 Cassette Exon       | 0,29 |
| TC0200002398.mm.1 | -1,09 Dlgap4 | JUC0200009804.mm.1 | 3,33  | 0,017019 | 0,461709                     |      |
| TC0200002398.mm.1 | -1,09 Dlgap4 | PSR0200019341.mm.1 | 2,72  | 0,014968 | 0,452048 Cassette Exon       | 0,4  |
| TC0200002398.mm.1 | -1,09 Dlgap4 | PSR0200019335.mm.1 | 2,6   | 0,042202 | 0,546983 Cassette Exon       | 0,19 |
| TC1100000106.mm.1 | -1,34 Ramp3  | JUC1100000580.mm.1 | 5,49  | 0,002323 | 0,3467                       |      |
| TC1100000106.mm.1 | -1,34 Ramp3  | PSR1100001104.mm.1 | 2,87  | 0,000785 | 0,309887 Cassette Exon       | 0,32 |
| TC1300002517.mm.1 | -1,06 Ptcd2  | JUC1300009008.mm.1 | 5,49  | 0,008986 | 0,411965                     |      |
| TC1300002517.mm.1 | -1,06 Ptcd2  | JUC1300009009.mm.1 | 2,69  | 0,017036 | 0,461729                     |      |
| TC0900002153.mm.1 | 4,88 Abcg4   | PSR0900017874.mm.1 | 5,46  | 0,014716 | 0,45037 Mutually Exclusive   | 0,27 |
| TC0900002153.mm.1 | 4,88 Abcg4   | JUC0900010067.mm.1 | 4,28  | 0,006751 | 0,393343                     |      |
| TC0900002153.mm.1 | 4,88 Abcg4   | JUC0900010063.mm.1 | 3,96  | 0,009532 | 0,416602                     |      |
| TC0900002153.mm.1 | 4,88 Abcg4   | PSR0900017860.mm.1 | -2,02 | 0,020199 | 0,477145 Alternative 5' Donc | 0,17 |
| TC0900002153.mm.1 | 4,88 Abcg4   | PSR0900017872.mm.1 | -2,22 | 0,04331  | 0,549297 Mutually Exclusive  | 0,27 |
| TC0900002153.mm.1 | 4,88 Abcg4   | PSR0900017865.mm.1 | -2,56 | 0,003355 | 0,354243 Alternative 5' Donc | 0,25 |
| TC0900002153.mm.1 | 4,88 Abcg4   | PSR0900017853.mm.1 | -2,97 | 0,000271 | 0,28803 Alternative 3' Acce  | 0,32 |
| TC0900002153.mm.1 | 4,88 Abcg4   | PSR0900017881.mm.1 | -3,08 | 0,006086 | 0,386691 Cassette Exon       | 0,19 |
| TC0900002153.mm.1 | 4,88 Abcg4   | JUC0900010072.mm.1 | -3,22 | 0,019648 | 0,474887                     |      |
| TC0900002153.mm.1 | 4,88 Abcg4   | PSR0900017885.mm.1 | -3,51 | 0,023234 | 0,490032 Alternative 5' Donc | 0,12 |
| TC0900002153.mm.1 | 4,88 Abcg4   | PSR0900017849.mm.1 | -3,77 | 0,003153 | 0,353892 Cassette Exon       | 0,39 |
| TC0900002153.mm.1 | 4,88 Abcg4   | PSR0900017883.mm.1 | -4,37 | 0,004828 | 0,371505 Alternative 5' Donc | 0,15 |
| TC0900002153.mm.1 | 4,88 Abcg4   | PSR0900017878.mm.1 | -4,68 | 0,010956 | 0,425117 Alternative 5' Donc | 0,38 |
| TC0900002153.mm.1 | 4,88 Abcg4   | PSR0900017884.mm.1 | -4,9  | 0,028701 | 0,508019 Alternative 5' Donc | 0,15 |
| TC0900002153.mm.1 | 4,88 Abcg4   | JUC0900010069.mm.1 | -7,47 | 0,008741 | 0,409629                     |      |
| TC1300002525.mm.1 | 2,09 Cartpt  | PSR1300016984.mm.1 | 5,46  | 0,012587 | 0,435924 Cassette Exon       | 0,28 |
| TC1300002525.mm.1 | 2,09 Cartpt  | PSR1300016982.mm.1 | 2,26  | 0,016493 | 0,459399 Alternative 3' Acce | 0,2  |
| TC0500003395.mm.1 | 1,19 Hip1    | JUC0500016727.mm.1 | 5,46  | 0,003559 | 0,356223                     |      |
| TC0600002481.mm.1 | -1,33        | JUC0600009981.mm.1 | 5,42  | 0,023257 | 0,490032                     |      |
| TC1000000349.mm.1 | 1,46 Cdk19   | JUC1000001270.mm.1 | 5,42  | 0,036792 | 0,532063                     |      |
| TC1000000349.mm.1 | 1,46 Cdk19   | JUC1000001283.mm.1 | -3,54 | 0,004336 | 0,364898                     |      |
| TC1300001330.mm.1 | 7,65 Hcn1    | PSR1300008343.mm.1 | 5,41  | 0,024116 | 0,49322 Cassette Exon        | 0,49 |
| TC1300001330.mm.1 | 7,65 Hcn1    | JUC1300004341.mm.1 | 5,32  | 0,030246 | 0,512493                     |      |
| TC1300001330.mm.1 | 7,65 Hcn1    | JUC1300004344.mm.1 | 4,16  | 0,039553 | 0,539764                     |      |
| TC1300001330.mm.1 | 7,65 Hcn1    | JUC1300004342.mm.1 | 3,51  | 0,037429 | 0,533831                     |      |
| TC1300001330.mm.1 | 7,65 Hcn1    | PSR1300008345.mm.1 | 2,87  | 0,019548 | 0,474538 Cassette Exon       | 0,42 |
| TC1300001330.mm.1 | 7,65 Hcn1    | PSR1300008346.mm.1 | 2,74  | 0,049991 | 0,564097 Cassette Exon       | 0,33 |
| TC1300001330.mm.1 | 7,65 Hcn1    | PSR1300008352.mm.1 | 2,69  | 0,029146 | 0,509333 Alternative 3' Acce | 0,19 |
| TC1300001330.mm.1 | 7,65 Hcn1    | JUC1300004340.mm.1 | 2,66  | 0,030482 | 0,513325                     |      |

|                   |               |                    |       |          |                              |      |
|-------------------|---------------|--------------------|-------|----------|------------------------------|------|
| TC1300001330.mm.1 | 7,65 Hcn1     | JUC1300004343.mm.1 | 2,15  | 0,040764 | 0,543108                     |      |
| TC1300001330.mm.1 | 7,65 Hcn1     | PSR1300008348.mm.1 | 2,07  | 0,045038 | 0,553049 Cassette Exon       | 0,25 |
| TC1300001330.mm.1 | 7,65 Hcn1     | PSR1300008342.mm.1 | -5,57 | 0,029033 | 0,508904 Cassette Exon       | 0,2  |
| TC1300001330.mm.1 | 7,65 Hcn1     | PSR1300008341.mm.1 | -8,38 | 0,005889 | 0,383835 Cassette Exon       | 0,2  |
| TC1700000464.mm.1 | 3,06 Pacsin1  | JUC1700002103.mm.1 | 5,41  | 0,045525 | 0,554359                     |      |
| TC1700000464.mm.1 | 3,06 Pacsin1  | JUC1700002104.mm.1 | 4,61  | 0,043399 | 0,549592                     |      |
| TC1700000464.mm.1 | 3,06 Pacsin1  | PSR1700003895.mm.1 | 2,03  | 0,025758 | 0,498442 Cassette Exon       | 0,09 |
| TC1700000464.mm.1 | 3,06 Pacsin1  | PSR1700003891.mm.1 | -3,11 | 0,016087 | 0,45751 Cassette Exon        | 0,24 |
| TC1700000464.mm.1 | 3,06 Pacsin1  | PSR1700003892.mm.1 | -4,2  | 0,007841 | 0,403342 Cassette Exon       | 0,28 |
| TC1700000464.mm.1 | 3,06 Pacsin1  | PSR1700003887.mm.1 | -4,44 | 0,002665 | 0,349612 Cassette Exon       | 0,28 |
| TC1700000464.mm.1 | 3,06 Pacsin1  | PSR1700003893.mm.1 | -4,58 | 0,00426  | 0,363704 Alternative 3' Acce | 0,48 |
| TC1700000464.mm.1 | 3,06 Pacsin1  | PSR1700003888.mm.1 | -5,06 | 0,009001 | 0,412183 Cassette Exon       | 0,24 |
| TC1000002531.mm.1 | 2,3 Atcay     | JUC1000010397.mm.1 | 5,41  | 0,002478 | 0,349135                     |      |
| TC1000002531.mm.1 | 2,3 Atcay     | JUC1000010390.mm.1 | 4,45  | 0,00349  | 0,355638                     |      |
| TC1000002531.mm.1 | 2,3 Atcay     | JUC1000010393.mm.1 | 3,62  | 0,001229 | 0,322251                     |      |
| TC1000002531.mm.1 | 2,3 Atcay     | PSR1000018942.mm.1 | 2,35  | 0,002605 | 0,349501 Mutually Exclusive  | 0,16 |
| TC1000002531.mm.1 | 2,3 Atcay     | PSR1000018943.mm.1 | -2,37 | 0,02048  | 0,478018 Mutually Exclusive  | 0,16 |
| TC1000002531.mm.1 | 2,3 Atcay     | PSR1000018934.mm.1 | -2,77 | 0,015177 | 0,452699 Alternative 3' Acce | 0,21 |
| TC1000002531.mm.1 | 2,3 Atcay     | JUC1000010387.mm.1 | -3,03 | 0,020163 | 0,477086                     |      |
| TC1700000672.mm.1 | -1,23 Ncr3-ps | JUC1700003776.mm.1 | 5,41  | 0,009504 | 0,416602                     |      |
| TC0700003609.mm.1 | 3,59 Ap3b2    | JUC0700016221.mm.1 | 5,39  | 0,01215  | 0,432885                     |      |
| TC0700003609.mm.1 | 3,59 Ap3b2    | JUC0700016206.mm.1 | 5     | 0,003947 | 0,359922                     |      |
| TC0700003609.mm.1 | 3,59 Ap3b2    | JUC0700016224.mm.1 | 4,49  | 0,005565 | 0,380918                     |      |
| TC0700003609.mm.1 | 3,59 Ap3b2    | PSR0700030736.mm.1 | 4,06  | 0,001936 | 0,340349 Cassette Exon       | 0,4  |
| TC0700003609.mm.1 | 3,59 Ap3b2    | PSR0700030741.mm.1 | 3,32  | 0,002453 | 0,349135 Cassette Exon       | 0,43 |
| TC0700003609.mm.1 | 3,59 Ap3b2    | JUC0700016227.mm.1 | 3,26  | 0,017451 | 0,463886                     |      |
| TC0700003609.mm.1 | 3,59 Ap3b2    | JUC0700016212.mm.1 | 2,92  | 0,001524 | 0,330287                     |      |
| TC0700003609.mm.1 | 3,59 Ap3b2    | PSR0700030737.mm.1 | 2,7   | 0,006975 | 0,395722 Cassette Exon       | 0,15 |
| TC0700003609.mm.1 | 3,59 Ap3b2    | JUC0700016213.mm.1 | 2,63  | 0,039391 | 0,539461                     |      |
| TC0700003609.mm.1 | 3,59 Ap3b2    | JUC0700016217.mm.1 | 2,56  | 0,00109  | 0,317224                     |      |
| TC0700003609.mm.1 | 3,59 Ap3b2    | PSR0700030731.mm.1 | -2,08 | 0,003551 | 0,356223 Alternative 3' Acce | 0,19 |
| TC0700003609.mm.1 | 3,59 Ap3b2    | PSR0700030714.mm.1 | -2,14 | 0,000998 | 0,316361 Cassette Exon       | 0,16 |
| TC0700003609.mm.1 | 3,59 Ap3b2    | PSR0700030719.mm.1 | -2,15 | 0,004442 | 0,367059 Cassette Exon       | 0,2  |
| TC0700003609.mm.1 | 3,59 Ap3b2    | PSR0700030747.mm.1 | -2,22 | 0,000315 | 0,288663                     |      |
| TC0700003609.mm.1 | 3,59 Ap3b2    | JUC0700016220.mm.1 | -2,29 | 0,000244 | 0,28803                      |      |
| TC0700003609.mm.1 | 3,59 Ap3b2    | JUC0700016210.mm.1 | -2,33 | 0,01288  | 0,438086                     |      |
| TC0700003609.mm.1 | 3,59 Ap3b2    | PSR0700030723.mm.1 | -2,41 | 0,021281 | 0,481666 Cassette Exon       | 0,05 |
| TC0700003609.mm.1 | 3,59 Ap3b2    | PSR0700030729.mm.1 | -2,43 | 0,047408 | 0,558302 Cassette Exon       | 0,04 |
| TC0700003609.mm.1 | 3,59 Ap3b2    | PSR0700030722.mm.1 | -2,54 | 0,025991 | 0,499207 Cassette Exon       | 0,16 |
| TC0700003609.mm.1 | 3,59 Ap3b2    | JUC0700016207.mm.1 | -2,54 | 0,004935 | 0,373093                     |      |
| TC0700003609.mm.1 | 3,59 Ap3b2    | PSR0700030744.mm.1 | -2,59 | 0,002646 | 0,349612 Alternative 3' Acce | 0,03 |
| TC0700003609.mm.1 | 3,59 Ap3b2    | PSR0700030715.mm.1 | -2,71 | 0,000217 | 0,28803 Cassette Exon        | 0,23 |
| TC0700003609.mm.1 | 3,59 Ap3b2    | PSR0700030749.mm.1 | -2,72 | 0,008757 | 0,409704 Alternative 5' Donc | 0,15 |
| TC0700003609.mm.1 | 3,59 Ap3b2    | JUC0700016228.mm.1 | -2,72 | 0,001396 | 0,325997                     |      |
| TC0700003609.mm.1 | 3,59 Ap3b2    | PSR0700030743.mm.1 | -2,8  | 0,003278 | 0,354243 Cassette Exon       | 0,07 |
| TC0700003609.mm.1 | 3,59 Ap3b2    | PSR0700030739.mm.1 | -2,81 | 0,003663 | 0,357266 Cassette Exon       | 0,45 |
| TC0700003609.mm.1 | 3,59 Ap3b2    | JUC0700016215.mm.1 | -2,85 | 0,01127  | 0,426793                     |      |
| TC0700003609.mm.1 | 3,59 Ap3b2    | PSR0700030734.mm.1 | -2,97 | 0,001322 | 0,324731 Alternative 3' Acce | 0,17 |

|                   |                    |                    |       |          |                              |  |      |
|-------------------|--------------------|--------------------|-------|----------|------------------------------|--|------|
| TC0700003609.mm.1 | 3,59 Ap3b2         | JUC0700016208.mm.1 | -3,04 | 0,022811 | 0,488246                     |  |      |
| TC0700003609.mm.1 | 3,59 Ap3b2         | PSR0700030745.mm.1 | -3,06 | 0,008152 | 0,40551 Casette Exon         |  | 0,09 |
| TC0700003609.mm.1 | 3,59 Ap3b2         | PSR0700030718.mm.1 | -3,15 | 0,003057 | 0,353892 Casette Exon        |  | 0,36 |
| TC0700003609.mm.1 | 3,59 Ap3b2         | PSR0700030748.mm.1 | -3,64 | 0,002224 | 0,345773 Alternative 5' Donc |  | 0,23 |
| TC0700003609.mm.1 | 3,59 Ap3b2         | PSR0700030720.mm.1 | -4,05 | 0,000441 | 0,297771 Casette Exon        |  | 0,34 |
| TC0700001287.mm.1 | 1,7 Dlg2           | JUC0700005769.mm.1 | 5,39  | 0,011099 | 0,426                        |  |      |
| TC0700001287.mm.1 | 1,7 Dlg2           | JUC0700005756.mm.1 | 2,62  | 0,011481 | 0,428025                     |  |      |
| TC0700001287.mm.1 | 1,7 Dlg2           | JUC0700005751.mm.1 | 2,56  | 0,015814 | 0,455923                     |  |      |
| TC0700001287.mm.1 | 1,7 Dlg2           | PSR0700011153.mm.1 | 2,04  | 0,018782 | 0,470789 Casette Exon        |  | 0,19 |
| TC0700001287.mm.1 | 1,7 Dlg2           | JUC0700005768.mm.1 | -2,08 | 0,008844 | 0,410308                     |  |      |
| TC0700001287.mm.1 | 1,7 Dlg2           | JUC0700005766.mm.1 | -2,12 | 0,038153 | 0,535762                     |  |      |
| TC0700001287.mm.1 | 1,7 Dlg2           | PSR0700011149.mm.1 | -2,31 | 0,016534 | 0,459611 Alternative 5' Donc |  | 0,2  |
| TC0700001287.mm.1 | 1,7 Dlg2           | PSR0700011169.mm.1 | -2,54 | 0,002379 | 0,348564 Alternative 5' Donc |  | 0,25 |
| TC0700001287.mm.1 | 1,7 Dlg2           | PSR0700011144.mm.1 | -2,68 | 0,042443 | 0,547627 Alternative 3' Acce |  | 0,24 |
| TC0700001287.mm.1 | 1,7 Dlg2           | PSR0700011137.mm.1 | -2,74 | 0,024128 | 0,493245 Casette Exon        |  | 0,17 |
| TC0700001287.mm.1 | 1,7 Dlg2           | JUC0700005758.mm.1 | -2,83 | 0,041483 | 0,544745                     |  |      |
| TC0700001607.mm.1 | 3,45 Tub; BC049265 | JUC0700006842.mm.1 | 5,38  | 0,008944 | 0,411374                     |  |      |
| TC0700001607.mm.1 | 3,45 Tub; BC049265 | PSR0700013327.mm.1 | 4,41  | 0,000239 | 0,28803 Casette Exon         |  | 0,52 |
| TC0700001607.mm.1 | 3,45 Tub; BC049265 | JUC0700006841.mm.1 | 3,42  | 0,013021 | 0,439354                     |  |      |
| TC0700001607.mm.1 | 3,45 Tub; BC049265 | PSR0700013328.mm.1 | 2,23  | 0,006813 | 0,39387 Casette Exon         |  | 0,22 |
| TC0700001607.mm.1 | 3,45 Tub; BC049265 | PSR0700013323.mm.1 | -2,41 | 0,001012 | 0,316361 Casette Exon        |  | 0,13 |
| TC0700001607.mm.1 | 3,45 Tub; BC049265 | PSR0700013319.mm.1 | -2,42 | 0,005727 | 0,382767 Casette Exon        |  | 0,27 |
| TC0700001607.mm.1 | 3,45 Tub; BC049265 | PSR0700013318.mm.1 | -2,91 | 0,02406  | 0,493026                     |  |      |
| TC0700001607.mm.1 | 3,45 Tub; BC049265 | PSR0700013311.mm.1 | -2,92 | 0,038323 | 0,536178                     |  |      |
| TC0700001607.mm.1 | 3,45 Tub; BC049265 | PSR0700013316.mm.1 | -3,49 | 0,009028 | 0,412682 Casette Exon        |  | 0,37 |
| TC0700001607.mm.1 | 3,45 Tub; BC049265 | JUC0700006836.mm.1 | -4,95 | 0,006744 | 0,393343                     |  |      |
| TC1500002162.mm.1 | -1 Col2a1          | JUC1500009947.mm.1 | 5,38  | 0,037805 | 0,534746                     |  |      |
| TC1500002162.mm.1 | -1 Col2a1          | JUC1500009954.mm.1 | 4,26  | 0,01251  | 0,435429                     |  |      |
| TC1500002162.mm.1 | -1 Col2a1          | PSR1500017455.mm.1 | 3,7   | 0,029053 | 0,508954 Casette Exon        |  | 0,34 |
| TC1500002162.mm.1 | -1 Col2a1          | JUC1500009946.mm.1 | 3,06  | 0,023417 | 0,490343                     |  |      |
| TC1500002162.mm.1 | -1 Col2a1          | PSR1500017457.mm.1 | 2,56  | 0,011387 | 0,427549 Casette Exon        |  | 0,31 |
| TC1500002162.mm.1 | -1 Col2a1          | PSR1500017518.mm.1 | 2,43  | 0,025581 | 0,497808 Casette Exon        |  | 0,12 |
| TC1500002162.mm.1 | -1 Col2a1          | JUC1500009979.mm.1 | -2,11 | 0,01703  | 0,461729                     |  |      |
| TC1300002715.mm.1 | -1,53 ltga2        | JUC1300009852.mm.1 | 5,38  | 0,029903 | 0,511142                     |  |      |
| TC1300002715.mm.1 | -1,53 ltga2        | JUC1300009865.mm.1 | 3,02  | 0,034542 | 0,525975                     |  |      |
| TC0600001653.mm.1 | -1 Plekha5         | JUC0600006922.mm.1 | 5,38  | 0,001214 | 0,322251                     |  |      |
| TC0600001653.mm.1 | -1 Plekha5         | JUC0600006908.mm.1 | 3,11  | 0,006832 | 0,393893                     |  |      |
| TC0600003538.mm.1 | -1,23 Atp6v0a4     | PSR0600016505.mm.1 | 5,37  | 0,008606 | 0,40841 Alternative 5' Donc  |  | 0,31 |
| TC0600003538.mm.1 | -1,23 Atp6v0a4     | PSR0600016504.mm.1 | 2,04  | 0,037282 | 0,533572 Casette Exon        |  | 0,19 |
| TC1400000265.mm.1 | -1,11 Dnah12       | JUC1400001226.mm.1 | 5,37  | 0,036265 | 0,530445                     |  |      |
| TC0700001252.mm.1 | -1,36 Nox4         | JUC0700005591.mm.1 | 5,37  | 0,010965 | 0,425117                     |  |      |
| TC1600000558.mm.1 | -1,35 Tmem39a      | JUC1600002793.mm.1 | 5,34  | 0,010758 | 0,423859                     |  |      |
| TC0900000730.mm.1 | -1,07 Stoml1       | JUC0900002852.mm.1 | 5,34  | 0,003991 | 0,360753                     |  |      |
| TC1800001625.mm.1 | 1,6 Rnf165         | JUC1800006512.mm.1 | 5,33  | 0,011403 | 0,427549                     |  |      |
| TC1800001625.mm.1 | 1,6 Rnf165         | PSR1800011691.mm.1 | 4,18  | 0,017794 | 0,465621                     |  |      |
| TC1800001625.mm.1 | 1,6 Rnf165         | JUC1800006515.mm.1 | -2,32 | 0,037841 | 0,534803                     |  |      |
| TC1800001625.mm.1 | 1,6 Rnf165         | JUC1800006510.mm.1 | -2,69 | 0,002972 | 0,352501                     |  |      |
| TC0400003890.mm.1 | 1,1 Ddi2; Rsc1a1   | JUC0400016816.mm.1 | 5,33  | 0,004675 | 0,370194                     |  |      |

|                   |                        |                    |       |          |                              |      |
|-------------------|------------------------|--------------------|-------|----------|------------------------------|------|
| TC0200005412.mm.1 | -1,64                  | JUC0200023765.mm.1 | 5,32  | 0,000646 | 0,304044                     |      |
| TC0600002580.mm.1 | 5,66 Vax2os            | PSR0600020053.mm.1 | 5,3   | 0,020008 | 0,476356 Intron Retention    | 0,74 |
| TC0600002580.mm.1 | 5,66 Vax2os            | PSR0600020060.mm.1 | 3     | 0,030445 | 0,513217 Cassette Exon       | 0,29 |
| TC0600002580.mm.1 | 5,66 Vax2os            | PSR0600020059.mm.1 | 2,47  | 0,036103 | 0,529729                     |      |
| TC0600002580.mm.1 | 5,66 Vax2os            | PSR0600020055.mm.1 | 2,16  | 0,023882 | 0,492304 Cassette Exon       | 0,22 |
| TC0600002580.mm.1 | 5,66 Vax2os            | PSR0600020046.mm.1 | -2,06 | 0,034784 | 0,526754 Cassette Exon       | 0,01 |
| TC0600002580.mm.1 | 5,66 Vax2os            | PSR0600020061.mm.1 | -2,17 | 0,009404 | 0,415782 Alternative 5' Donc | 0,27 |
| TC0600002580.mm.1 | 5,66 Vax2os            | PSR0600020048.mm.1 | -2,33 | 0,028467 | 0,507299 Alternative 3' Acce | 0,21 |
| TC0600002580.mm.1 | 5,66 Vax2os            | PSR0600020037.mm.1 | -2,5  | 0,029591 | 0,510513 Cassette Exon       | 0,25 |
| TC0600002580.mm.1 | 5,66 Vax2os            | PSR0600020067.mm.1 | -2,55 | 0,030858 | 0,514381 Cassette Exon       | 0,14 |
| TC0600002580.mm.1 | 5,66 Vax2os            | JUC0600010412.mm.1 | -3,16 | 0,024592 | 0,494446                     |      |
| TC0600002580.mm.1 | 5,66 Vax2os            | JUC0600010408.mm.1 | -4,01 | 0,012283 | 0,434168                     |      |
| TC0600002580.mm.1 | 5,66 Vax2os            | PSR0600020066.mm.1 | -4,02 | 0,010109 | 0,418998 Alternative 5' Donc | 0,48 |
| TC0600002580.mm.1 | 5,66 Vax2os            | JUC0600010418.mm.1 | -4,76 | 0,003316 | 0,354243                     |      |
| TC0600002580.mm.1 | 5,66 Vax2os            | JUC0600010413.mm.1 | -5,58 | 0,006024 | 0,386586                     |      |
| TC0600002580.mm.1 | 5,66 Vax2os            | PSR0600020065.mm.1 | -6,16 | 0,006083 | 0,386691 Alternative 5' Donc | 0,48 |
| TC0600002580.mm.1 | 5,66 Vax2os            | JUC0600010407.mm.1 | -7,6  | 0,00391  | 0,359698                     |      |
| TC0600002580.mm.1 | 5,66 Vax2os            | JUC0600010405.mm.1 | -8,56 | 0,006077 | 0,386691                     |      |
| TC0700004095.mm.1 | -1,38 Sbf2             | JUC0700017805.mm.1 | 5,3   | 0,001949 | 0,34055                      |      |
| TC0700004095.mm.1 | -1,38 Sbf2             | JUC0700017795.mm.1 | 3,68  | 0,027196 | 0,503373                     |      |
| TC0700004095.mm.1 | -1,38 Sbf2             | JUC0700017828.mm.1 | 3,5   | 0,005416 | 0,379167                     |      |
| TC0700004095.mm.1 | -1,38 Sbf2             | PSR0700033878.mm.1 | 3,02  | 0,009709 | 0,417826 Cassette Exon       | 0,18 |
| TC0700004095.mm.1 | -1,38 Sbf2             | JUC0700017833.mm.1 | 2,44  | 0,016477 | 0,459352                     |      |
| TC0700004095.mm.1 | -1,38 Sbf2             | PSR0700033879.mm.1 | 2,42  | 0,008185 | 0,40568 Cassette Exon        | 0,18 |
| TC0700004095.mm.1 | -1,38 Sbf2             | JUC0700017838.mm.1 | -3,97 | 0,000296 | 0,288663                     |      |
| TC0600000925.mm.1 | 1,4 Dctn1              | JUC0600003554.mm.1 | 5,3   | 0,012985 | 0,439245                     |      |
| TC0600000925.mm.1 | 1,4 Dctn1              | PSR0600006993.mm.1 | -2,04 | 0,000049 | 0,24627 Cassette Exon        | 0,07 |
| TC1400000261.mm.1 | -1,08 Dennd6a; Fam116a | JUC1400001177.mm.1 | 5,3   | 0,017113 | 0,46232                      |      |
| TC1400000261.mm.1 | -1,08 Dennd6a; Fam116a | JUC1400001195.mm.1 | -2,1  | 0,047624 | 0,558743                     |      |
| TC0100003876.mm.1 | -1,14 Tex30            | PSR0100018283.mm.1 | 5,29  | 0,007962 | 0,403853 Cassette Exon       | 0,23 |
| TC1400002572.mm.1 | 1,12 Klhl1             | JUC1400010685.mm.1 | 5,29  | 0,010142 | 0,419347                     |      |
| TC0500003238.mm.1 | 1,03 Clip1             | JUC0500015856.mm.1 | 5,29  | 0,005067 | 0,375225                     |      |
| TC0500003238.mm.1 | 1,03 Clip1             | JUC0500015859.mm.1 | 3,93  | 0,002161 | 0,344238                     |      |
| TC0500003238.mm.1 | 1,03 Clip1             | JUC0500015858.mm.1 | 2,76  | 0,024046 | 0,493026                     |      |
| TC1100003410.mm.1 | -1,35 Aatf             | JUC1100016312.mm.1 | 5,29  | 0,00651  | 0,391307                     |      |
| TC1100002493.mm.1 | 3,21 Kcnp1             | JUC1100012078.mm.1 | 5,28  | 0,002965 | 0,352501                     |      |
| TC1100002493.mm.1 | 3,21 Kcnp1             | JUC1100012079.mm.1 | 2,17  | 0,039234 | 0,538857                     |      |
| TC1100002493.mm.1 | 3,21 Kcnp1             | PSR1100023236.mm.1 | -2,31 | 0,013973 | 0,446239 Cassette Exon       | 0,12 |
| TC1100002493.mm.1 | 3,21 Kcnp1             | PSR1100023229.mm.1 | -3,21 | 0,008427 | 0,406611 Intron Retention    | 0,55 |
| TC1100002493.mm.1 | 3,21 Kcnp1             | PSR1100023241.mm.1 | -3,7  | 0,008764 | 0,409781 Cassette Exon       | 0,27 |
| TC1100002493.mm.1 | 3,21 Kcnp1             | PSR1100023225.mm.1 | -3,75 | 0,016703 | 0,460124 Alternative 3' Acce | 0,45 |
| TC1100002493.mm.1 | 3,21 Kcnp1             | PSR1100023233.mm.1 | -4,07 | 0,008421 | 0,406611 Alternative 5' Donc | 0,39 |
| TC1100002493.mm.1 | 3,21 Kcnp1             | PSR1100023220.mm.1 | -4,14 | 0,010104 | 0,418998 Alternative 3' Acce | 0,48 |
| TC1100002493.mm.1 | 3,21 Kcnp1             | PSR1100023231.mm.1 | -4,27 | 0,00621  | 0,387912 Intron Retention    | 0,74 |
| TC1100002493.mm.1 | 3,21 Kcnp1             | PSR1100023226.mm.1 | -4,28 | 0,004381 | 0,3661 Alternative 3' Acce   | 0,47 |
| TC1100002493.mm.1 | 3,21 Kcnp1             | PSR1100023240.mm.1 | -5,61 | 0,004774 | 0,371044 Cassette Exon       | 0,28 |
| TC1100002493.mm.1 | 3,21 Kcnp1             | PSR1100023235.mm.1 | -5,79 | 0,006961 | 0,395722 Alternative 3' Acce | 0,27 |
| TC1100002493.mm.1 | 3,21 Kcnp1             | PSR1100023242.mm.1 | -6,5  | 0,003684 | 0,357266 Cassette Exon       | 0,27 |

|                   |                    |                    |       |          |          |                     |      |
|-------------------|--------------------|--------------------|-------|----------|----------|---------------------|------|
| TC1100002493.mm.1 | 3,21 Kcnp1         | PSR1100023237.mm.1 | -6,6  | 0,003643 | 0,356919 | Alternative 5' Donc | 0,27 |
| TC0800000955.mm.1 | 1,62 Cacna1a       | JUC0800003798.mm.1 | 5,28  | 0,00224  | 0,34578  |                     |      |
| TC0800000955.mm.1 | 1,62 Cacna1a       | JUC0800003797.mm.1 | 3,65  | 0,039514 | 0,539762 |                     |      |
| TC0800000955.mm.1 | 1,62 Cacna1a       | JUC0800003773.mm.1 | 3,28  | 0,001831 | 0,337331 |                     |      |
| TC0800000955.mm.1 | 1,62 Cacna1a       | JUC0800003779.mm.1 | 3,27  | 0,00437  | 0,365608 |                     |      |
| TC0800000955.mm.1 | 1,62 Cacna1a       | JUC0800003781.mm.1 | 2,87  | 0,01735  | 0,46355  |                     |      |
| TC0800000955.mm.1 | 1,62 Cacna1a       | PSR0800007104.mm.1 | 2,81  | 0,015082 | 0,452418 | Cassette Exon       | 0,27 |
| TC0800000955.mm.1 | 1,62 Cacna1a       | JUC0800003783.mm.1 | 2,69  | 0,032375 | 0,519221 |                     |      |
| TC0800000955.mm.1 | 1,62 Cacna1a       | JUC0800003770.mm.1 | 2,55  | 0,003348 | 0,354243 |                     |      |
| TC0800000955.mm.1 | 1,62 Cacna1a       | PSR0800007111.mm.1 | 2,44  | 0,009293 | 0,414813 | Cassette Exon       | 0,13 |
| TC0800000955.mm.1 | 1,62 Cacna1a       | JUC0800003796.mm.1 | 2,36  | 0,004615 | 0,369794 |                     |      |
| TC0800000955.mm.1 | 1,62 Cacna1a       | JUC0800003780.mm.1 | 2,35  | 0,017833 | 0,46608  |                     |      |
| TC0800000955.mm.1 | 1,62 Cacna1a       | PSR0800007114.mm.1 | 2,34  | 0,003342 | 0,354243 | Cassette Exon       | 0,29 |
| TC0800000955.mm.1 | 1,62 Cacna1a       | JUC0800003771.mm.1 | 2,23  | 0,002423 | 0,34896  |                     |      |
| TC0800000955.mm.1 | 1,62 Cacna1a       | JUC0800003772.mm.1 | 2,01  | 0,047572 | 0,558743 |                     |      |
| TC0800000955.mm.1 | 1,62 Cacna1a       | PSR0800007155.mm.1 | -2,14 | 0,049717 | 0,563531 | Cassette Exon       | 0,16 |
| TC0800000955.mm.1 | 1,62 Cacna1a       | PSR0800007148.mm.1 | -2,31 | 0,045024 | 0,553022 | Cassette Exon       | 0,19 |
| TC0800000955.mm.1 | 1,62 Cacna1a       | JUC0800003820.mm.1 | -2,42 | 0,030935 | 0,514624 |                     |      |
| TC0800000955.mm.1 | 1,62 Cacna1a       | JUC0800003813.mm.1 | -2,66 | 0,008184 | 0,40568  |                     |      |
| TC0800000955.mm.1 | 1,62 Cacna1a       | PSR0800007152.mm.1 | -2,99 | 0,002978 | 0,352501 | Cassette Exon       | 0,2  |
| TC0800000955.mm.1 | 1,62 Cacna1a       | JUC0800003803.mm.1 | -3,86 | 0,003514 | 0,355749 |                     |      |
| TC0900003000.mm.1 | -1,01 Col6a4; Dvwa | JUC0900013928.mm.1 | 5,28  | 0,002647 | 0,349612 |                     |      |
| TC0500001628.mm.1 | 2,04 Act16b        | JUC0500008060.mm.1 | 5,26  | 0,000539 | 0,304044 |                     |      |
| TC0500001628.mm.1 | 2,04 Act16b        | JUC0500008057.mm.1 | 4,95  | 0,022779 | 0,488083 |                     |      |
| TC0500001628.mm.1 | 2,04 Act16b        | JUC0500008059.mm.1 | 3,88  | 0,017108 | 0,46232  |                     |      |
| TC0500001628.mm.1 | 2,04 Act16b        | PSR0500014787.mm.1 | 2,28  | 0,002862 | 0,352207 | Mutually Exclusive  | 0,24 |
| TC0500001628.mm.1 | 2,04 Act16b        | PSR0500014789.mm.1 | -2,23 | 0,020577 | 0,478502 | Mutually Exclusive  | 0,24 |
| TC0500001628.mm.1 | 2,04 Act16b        | PSR0500014769.mm.1 | -2,59 | 0,00371  | 0,357512 | Intron Retention    | 0,24 |
| TC0500001628.mm.1 | 2,04 Act16b        | JUC0500008067.mm.1 | -2,96 | 0,022815 | 0,488253 |                     |      |
| TC0500001628.mm.1 | 2,04 Act16b        | JUC0500008066.mm.1 | -3,95 | 0,005429 | 0,379581 |                     |      |
| TC1200001643.mm.1 | 1,55 Tspan13       | JUC1200006326.mm.1 | 5,26  | 0,03554  | 0,528764 |                     |      |
| TC0900000223.mm.1 | 3,35 Bbs9          | JUC0900000925.mm.1 | 5,25  | 0,008698 | 0,409002 |                     |      |
| TC0900000223.mm.1 | 3,35 Bbs9          | PSR0900001729.mm.1 | -2,5  | 0,013595 | 0,443703 | Alternative 5' Donc | 0,2  |
| TC0900000223.mm.1 | 3,35 Bbs9          | PSR0900001727.mm.1 | -2,57 | 0,003616 | 0,356223 | Alternative 3' Acce | 0,22 |
| TC0900000223.mm.1 | 3,35 Bbs9          | JUC0900000929.mm.1 | -2,68 | 0,011686 | 0,429961 |                     |      |
| TC0900000223.mm.1 | 3,35 Bbs9          | JUC0900000918.mm.1 | -2,83 | 0,00544  | 0,379743 |                     |      |
| TC0900000223.mm.1 | 3,35 Bbs9          | JUC0900000915.mm.1 | -2,88 | 0,000974 | 0,314364 |                     |      |
| TC0900000223.mm.1 | 3,35 Bbs9          | PSR0900001703.mm.1 | -2,99 | 0,008314 | 0,406313 | Cassette Exon       | 0,35 |
| TC0900000223.mm.1 | 3,35 Bbs9          | PSR0900001697.mm.1 | -3,12 | 0,005315 | 0,378059 | Cassette Exon       | 0,44 |
| TC0900000223.mm.1 | 3,35 Bbs9          | JUC0900000899.mm.1 | -3,19 | 0,012297 | 0,434295 |                     |      |
| TC0900000223.mm.1 | 3,35 Bbs9          | PSR0900001734.mm.1 | -3,3  | 0,002391 | 0,348564 | Intron Retention    | 0,38 |
| TC0900000223.mm.1 | 3,35 Bbs9          | JUC0900000916.mm.1 | -3,34 | 0,000955 | 0,313363 |                     |      |
| TC0900000223.mm.1 | 3,35 Bbs9          | JUC0900000923.mm.1 | -3,59 | 0,004018 | 0,361353 |                     |      |
| TC0900000223.mm.1 | 3,35 Bbs9          | PSR0900001723.mm.1 | -4,04 | 0,048943 | 0,5618   | Alternative 3' Acce | 0,42 |
| TC0900000223.mm.1 | 3,35 Bbs9          | PSR0900001698.mm.1 | -4,71 | 0,002728 | 0,349612 | Cassette Exon       | 0,45 |
| TC0900000223.mm.1 | 3,35 Bbs9          | PSR0900001693.mm.1 | -4,98 | 0,004015 | 0,361291 | Alternative 3' Acce | 0,46 |
| TC0900000223.mm.1 | 3,35 Bbs9          | JUC0900000926.mm.1 | -5,19 | 0,041811 | 0,545586 |                     |      |
| TC0900000223.mm.1 | 3,35 Bbs9          | JUC0900000921.mm.1 | -9,15 | 0,000457 | 0,298999 |                     |      |

|                   |                               |                    |       |          |                              |      |
|-------------------|-------------------------------|--------------------|-------|----------|------------------------------|------|
| TC100000924.mm.1  | -2,26 Gm4924                  | PSR1000007364.mm.1 | 5,25  | 0,005214 | 0,377078 Cassette Exon       | 0,32 |
| TC100000924.mm.1  | -2,26 Gm4924                  | PSR1000007363.mm.1 | 3,72  | 0,04038  | 0,541974 Cassette Exon       | 0,29 |
| TC100000924.mm.1  | -2,26 Gm4924                  | PSR1000007355.mm.1 | 3,32  | 0,019897 | 0,47586 Cassette Exon        | 0,23 |
| TC100000924.mm.1  | -2,26 Gm4924                  | PSR1000007359.mm.1 | 3,19  | 0,025321 | 0,497278 Alternative 3' Acce | 0,28 |
| TC100000924.mm.1  | -2,26 Gm4924                  | PSR1000007352.mm.1 | 3,1   | 0,049222 | 0,562499 Cassette Exon       | 0,16 |
| TC100000924.mm.1  | -2,26 Gm4924                  | PSR1000007357.mm.1 | 3,03  | 0,005045 | 0,374724 Cassette Exon       | 0,24 |
| TC100000924.mm.1  | -2,26 Gm4924                  | PSR1000007350.mm.1 | 2,98  | 0,024463 | 0,493992 Cassette Exon       | 0,24 |
| TC100000924.mm.1  | -2,26 Gm4924                  | PSR1000007360.mm.1 | 2,73  | 0,027977 | 0,505748 Alternative 3' Acce | 0,28 |
| TC100000924.mm.1  | -2,26 Gm4924                  | PSR1000007356.mm.1 | 2,5   | 0,042413 | 0,547627 Cassette Exon       | 0,1  |
| TC100000924.mm.1  | -2,26 Gm4924                  | PSR1000007366.mm.1 | 2,38  | 0,04381  | 0,550456 Cassette Exon       | 0,18 |
| TC0800001650.mm.1 | 1,03                          | PSR0800013555.mm.1 | 5,25  | 0,000241 | 0,28803 Cassette Exon        | 0,28 |
| TC0200003171.mm.1 | 2,11 Camsap1                  | JUC0200013325.mm.1 | 5,25  | 0,003888 | 0,359225                     |      |
| TC0200003171.mm.1 | 2,11 Camsap1                  | PSR0200026349.mm.1 | 2,14  | 0,005781 | 0,383104 Cassette Exon       | 0,25 |
| TC0200003171.mm.1 | 2,11 Camsap1                  | PSR0200026365.mm.1 | -2,13 | 0,019696 | 0,474887 Cassette Exon       | 0,09 |
| TC0200003171.mm.1 | 2,11 Camsap1                  | PSR0200026362.mm.1 | -2,46 | 0,005357 | 0,378582 Cassette Exon       | 0,14 |
| TC0200003171.mm.1 | 2,11 Camsap1                  | PSR0200026332.mm.1 | -2,57 | 0,037703 | 0,534532 Alternative 5' Donc | 0,19 |
| TC0200003171.mm.1 | 2,11 Camsap1                  | JUC0200013304.mm.1 | -2,58 | 0,006113 | 0,387239                     |      |
| TC0200003171.mm.1 | 2,11 Camsap1                  | JUC0200013320.mm.1 | -2,59 | 0,023724 | 0,491556                     |      |
| TC0400003958.mm.1 | 1,36 Tnfrsf8                  | PSR0400032839.mm.1 | 5,22  | 0,003412 | 0,355242 Cassette Exon       | 0,32 |
| TC0400003958.mm.1 | 1,36 Tnfrsf8                  | PSR0400032835.mm.1 | -2,14 | 0,003178 | 0,354243 Cassette Exon       | 0,12 |
| TC1700002177.mm.1 | 1,3 Ttbk1                     | JUC1700010871.mm.1 | 5,22  | 0,002076 | 0,342181                     |      |
| TC1700002177.mm.1 | 1,3 Ttbk1                     | JUC1700010878.mm.1 | 4,28  | 0,008583 | 0,40821                      |      |
| TC1700002177.mm.1 | 1,3 Ttbk1                     | JUC1700010869.mm.1 | -2,02 | 0,017608 | 0,464312                     |      |
| TC1700002177.mm.1 | 1,3 Ttbk1                     | JUC1700010880.mm.1 | -2,31 | 0,004229 | 0,363295                     |      |
| TC1700002177.mm.1 | 1,3 Ttbk1                     | JUC1700010879.mm.1 | -2,36 | 0,006243 | 0,388361                     |      |
| TC1400000684.mm.1 | -1,2 Trav6d-6; Trav11; Tnpo3; | JUC1400002983.mm.1 | 5,21  | 0,0371   | 0,532885                     |      |
| TC1400000684.mm.1 | -1,2 Trav6d-6; Trav11; Tnpo3; | PSR1400005424.mm.1 | -2,19 | 0,029677 | 0,510918 Cassette Exon       | 0,1  |
| TC1400000684.mm.1 | -1,2 Trav6d-6; Trav11; Tnpo3; | JUC1400002988.mm.1 | -2,6  | 0,013082 | 0,4396                       |      |
| TC1400000684.mm.1 | -1,2 Trav6d-6; Trav11; Tnpo3; | JUC1400002976.mm.1 | -3,85 | 0,000402 | 0,297771                     |      |
| TC1100003110.mm.1 | 1,26 Camta2                   | JUC1100015057.mm.1 | 5,21  | 0,003327 | 0,354243                     |      |
| TC1100003110.mm.1 | 1,26 Camta2                   | JUC1100015058.mm.1 | 5,17  | 0,000842 | 0,311886                     |      |
| TC1100003110.mm.1 | 1,26 Camta2                   | JUC1100015037.mm.1 | -2,77 | 0,035795 | 0,529153                     |      |
| TC1400000292.mm.1 | 7,17 Lrtm1                    | JUC1400001401.mm.1 | 5,2   | 0,00002  | 0,211693                     |      |
| TC1400000292.mm.1 | 7,17 Lrtm1                    | PSR1400002365.mm.1 | 2,97  | 0,001247 | 0,322251 Cassette Exon       | 0,32 |
| TC1400000292.mm.1 | 7,17 Lrtm1                    | PSR1400002372.mm.1 | -2,14 | 0,003677 | 0,357266                     |      |
| TC1400000292.mm.1 | 7,17 Lrtm1                    | PSR1400002367.mm.1 | -2,34 | 0,006425 | 0,389922 Alternative 3' Acce | 0,26 |
| TC1400000292.mm.1 | 7,17 Lrtm1                    | PSR1400002363.mm.1 | -4,18 | 0,000689 | 0,304792 Alternative 3' Acce | 0,48 |
| TC1400000292.mm.1 | 7,17 Lrtm1                    | JUC1400001403.mm.1 | -5,44 | 0,042468 | 0,547627                     |      |
| TC1400000292.mm.1 | 7,17 Lrtm1                    | JUC1400001402.mm.1 | -6,48 | 0,007325 | 0,399002                     |      |
| TC1700002438.mm.1 | -1,19 Ptprm                   | JUC1700012121.mm.1 | 5,2   | 0,019813 | 0,475268                     |      |
| TC0700002827.mm.1 | -1,38 Pdccl2l                 | JUC0700013497.mm.1 | 5,2   | 0,035968 | 0,529457                     |      |
| TC1900001726.mm.1 | 1,45 Hspa12a                  | PSR1900015284.mm.1 | 5,17  | 0,005673 | 0,382036 Alternative 3' Acce | 0,33 |
| TC1900001726.mm.1 | 1,45 Hspa12a                  | PSR1900015289.mm.1 | 3,74  | 0,02023  | 0,477145 Cassette Exon       | 0,31 |
| TC1900001726.mm.1 | 1,45 Hspa12a                  | PSR1900015292.mm.1 | 2,95  | 0,011487 | 0,428148 Cassette Exon       | 0,18 |
| TC1900001726.mm.1 | 1,45 Hspa12a                  | PSR1900015287.mm.1 | 2,78  | 0,024722 | 0,494838 Cassette Exon       | 0,25 |
| TC1900001726.mm.1 | 1,45 Hspa12a                  | JUC1900008506.mm.1 | 2,3   | 0,011836 | 0,43053                      |      |
| TC1900001726.mm.1 | 1,45 Hspa12a                  | PSR1900015298.mm.1 | -2,02 | 0,024692 | 0,494805 Alternative 5' Donc | 0,11 |
| TC0400004071.mm.1 | 2,99 Camta1                   | PSR0400033872.mm.1 | 5,16  | 0,000166 | 0,272566 Alternative 3' Acce | 0,42 |



|                   |       |                  |                    |       |          |          |                          |
|-------------------|-------|------------------|--------------------|-------|----------|----------|--------------------------|
| TC0400004071.mm.1 | 2,99  | Camta1           | JUC0400017672.mm.1 | 3,14  | 0,023842 | 0,491997 |                          |
| TC0400004071.mm.1 | 2,99  | Camta1           | JUC0400017658.mm.1 | 2,76  | 0,003316 | 0,354243 |                          |
| TC0400004071.mm.1 | 2,99  | Camta1           | PSR0400033859.mm.1 | 2,47  | 0,001486 | 0,329081 | Cassette Exon 0,16       |
| TC0400004071.mm.1 | 2,99  | Camta1           | JUC0400017683.mm.1 | 2,04  | 0,025326 | 0,49728  |                          |
| TC0400004071.mm.1 | 2,99  | Camta1           | PSR0400033898.mm.1 | -2,06 | 0,032506 | 0,519769 | Cassette Exon 0,5        |
| TC0400004071.mm.1 | 2,99  | Camta1           | JUC0400017681.mm.1 | -2,16 | 0,024726 | 0,494838 |                          |
| TC0400004071.mm.1 | 2,99  | Camta1           | PSR0400033889.mm.1 | -2,25 | 0,028609 | 0,507714 | Cassette Exon 0,26       |
| TC0400004071.mm.1 | 2,99  | Camta1           | JUC0400017651.mm.1 | -2,4  | 0,047519 | 0,558686 |                          |
| TC0400004071.mm.1 | 2,99  | Camta1           | PSR0400033899.mm.1 | -2,42 | 0,012058 | 0,432426 | Cassette Exon 0,5        |
| TC0400004071.mm.1 | 2,99  | Camta1           | PSR0400033890.mm.1 | -2,42 | 0,031182 | 0,515739 | Cassette Exon 0,19       |
| TC0400004071.mm.1 | 2,99  | Camta1           | PSR0400033893.mm.1 | -2,45 | 0,03396  | 0,524252 | Cassette Exon 0,28       |
| TC0400004071.mm.1 | 2,99  | Camta1           | PSR0400033897.mm.1 | -2,5  | 0,018733 | 0,470733 | Cassette Exon 0,5        |
| TC0400004071.mm.1 | 2,99  | Camta1           | JUC0400017666.mm.1 | -2,61 | 0,019282 | 0,473074 |                          |
| TC0400004071.mm.1 | 2,99  | Camta1           | JUC0400017682.mm.1 | -2,64 | 0,031285 | 0,516126 |                          |
| TC0400004071.mm.1 | 2,99  | Camta1           | PSR0400033909.mm.1 | -2,66 | 0,015046 | 0,45215  | Alternative 5' Donc 0,16 |
| TC0400004071.mm.1 | 2,99  | Camta1           | PSR0400033885.mm.1 | -2,77 | 0,027644 | 0,504658 | Cassette Exon 0,19       |
| TC0400004071.mm.1 | 2,99  | Camta1           | PSR0400033879.mm.1 | -2,96 | 0,032478 | 0,519641 | Cassette Exon 0,18       |
| TC0400004071.mm.1 | 2,99  | Camta1           | JUC0400017691.mm.1 | -3,08 | 0,021119 | 0,480595 |                          |
| TC0400004071.mm.1 | 2,99  | Camta1           | PSR0400033878.mm.1 | -3,23 | 0,033316 | 0,522414 | Alternative 5' Donc 0,22 |
| TC0400004071.mm.1 | 2,99  | Camta1           | PSR0400033894.mm.1 | -3,39 | 0,029381 | 0,509995 | Cassette Exon 0,46       |
| TC0400004071.mm.1 | 2,99  | Camta1           | JUC0400017665.mm.1 | -3,46 | 0,010841 | 0,424161 |                          |
| TC0400004071.mm.1 | 2,99  | Camta1           | JUC0400017684.mm.1 | -3,56 | 0,001354 | 0,325427 |                          |
| TC0400004071.mm.1 | 2,99  | Camta1           | PSR0400033888.mm.1 | -3,67 | 0,015289 | 0,453345 | Cassette Exon 0,39       |
| TC0400004071.mm.1 | 2,99  | Camta1           | PSR0400033881.mm.1 | -3,93 | 0,001208 | 0,322251 | Cassette Exon 0,46       |
| TC0400004071.mm.1 | 2,99  | Camta1           | JUC0400017667.mm.1 | -4,41 | 0,014517 | 0,449545 |                          |
| TC0400004071.mm.1 | 2,99  | Camta1           | JUC0400017692.mm.1 | -4,55 | 0,019218 | 0,472971 |                          |
| TC0400004071.mm.1 | 2,99  | Camta1           | PSR0400033882.mm.1 | -5,27 | 0,00687  | 0,394155 | Cassette Exon 0,24       |
| TC0900001792.mm.1 | 2,51  | Fat3             | JUC0900008509.mm.1 | 5,16  | 0,000168 | 0,272566 |                          |
| TC0900001792.mm.1 | 2,51  | Fat3             | PSR0900015118.mm.1 | 3,06  | 0,039485 | 0,539762 | Cassette Exon 0,2        |
| TC0900001792.mm.1 | 2,51  | Fat3             | PSR0900015108.mm.1 | 2,27  | 0,004809 | 0,371408 | Cassette Exon 0,09       |
| TC0900001792.mm.1 | 2,51  | Fat3             | PSR0900015095.mm.1 | -2,01 | 0,015872 | 0,456526 | Cassette Exon 0,1        |
| TC0900001792.mm.1 | 2,51  | Fat3             | PSR0900015101.mm.1 | -2,14 | 0,029479 | 0,510123 | Cassette Exon 0,12       |
| TC0900001792.mm.1 | 2,51  | Fat3             | PSR0900015099.mm.1 | -2,15 | 0,033915 | 0,52424  | Cassette Exon 0,18       |
| TC0900001792.mm.1 | 2,51  | Fat3             | JUC0900008511.mm.1 | -2,35 | 0,001457 | 0,328449 |                          |
| TC0900001792.mm.1 | 2,51  | Fat3             | JUC0900008506.mm.1 | -2,68 | 0,017763 | 0,465437 |                          |
| TC0900001792.mm.1 | 2,51  | Fat3             | PSR0900015092.mm.1 | -2,7  | 0,014663 | 0,450098 | Alternative 5' Donc 0,27 |
| TC0900001792.mm.1 | 2,51  | Fat3             | PSR0900015100.mm.1 | -3,44 | 0,008364 | 0,406435 | Cassette Exon 0,28       |
| TC0900001792.mm.1 | 2,51  | Fat3             | PSR0900015096.mm.1 | -3,64 | 0,0037   | 0,357266 | Alternative 3' Acce 0,29 |
| TC0900001792.mm.1 | 2,51  | Fat3             | JUC0900008502.mm.1 | -3,74 | 0,043913 | 0,550676 |                          |
| TC1200001523.mm.1 | 2     | Gm21067; Gm10330 | PSR1200010618.mm.1 | 5,16  | 0,002126 | 0,342919 | Cassette Exon 0,28       |
| TC1200001523.mm.1 | 2     | Gm21067; Gm10330 | PSR1200010624.mm.1 | 2,3   | 0,023898 | 0,492304 | Cassette Exon 0,09       |
| TC1700002661.mm.1 | -1,01 | Six3os1          | JUC1700013052.mm.1 | 5,15  | 0,007371 | 0,39943  |                          |
| TC1700002661.mm.1 | -1,01 | Six3os1          | PSR1700024208.mm.1 | 2,13  | 0,035489 | 0,528724 | Alternative 5' Donc 0,18 |
| TC0500002429.mm.1 | -1,08 | Gm15820          | JUC0500011921.mm.1 | 5,15  | 0,005496 | 0,379939 |                          |
| TC0900001202.mm.1 | -1,16 | Atr              | JUC0900005129.mm.1 | 5,14  | 0,020063 | 0,476514 |                          |
| TC0700004464.mm.1 | 1,36  | Ebf3             | PSR0700037437.mm.1 | 5,13  | 0,041657 | 0,545333 |                          |
| TC0700004464.mm.1 | 1,36  | Ebf3             | PSR0700037438.mm.1 | 4,21  | 0,011828 | 0,430502 |                          |
| TC0700004464.mm.1 | 1,36  | Ebf3             | JUC0700019721.mm.1 | 2,83  | 0,010674 | 0,423096 |                          |

|                   |                              |                    |       |          |                              |      |
|-------------------|------------------------------|--------------------|-------|----------|------------------------------|------|
| TC0700004464.mm.1 | 1,36 Ebf3                    | JUC0700019725.mm.1 | 2,6   | 0,001788 | 0,336311                     |      |
| TC0700004464.mm.1 | 1,36 Ebf3                    | JUC0700019737.mm.1 | -2,56 | 0,008892 | 0,410717                     |      |
| TC0700004464.mm.1 | 1,36 Ebf3                    | PSR0700037434.mm.1 | -3,31 | 0,041772 | 0,545564 Alternative 3' Acce | 0,37 |
| TC0600001275.mm.1 | 2,3 Syn2                     | JUC0600005225.mm.1 | 5,12  | 0,003605 | 0,356223                     |      |
| TC0600001275.mm.1 | 2,3 Syn2                     | PSR0600010079.mm.1 | 2,12  | 0,013704 | 0,444758 Mutually Exclusive  | 0,17 |
| TC0600001275.mm.1 | 2,3 Syn2                     | PSR0600010083.mm.1 | -2,4  | 0,008795 | 0,409822 Cassette Exon       | 0,13 |
| TC0600001275.mm.1 | 2,3 Syn2                     | PSR0600010084.mm.1 | -2,43 | 0,006664 | 0,392838 Cassette Exon       | 0,13 |
| TC0600001275.mm.1 | 2,3 Syn2                     | PSR0600010064.mm.1 | -2,54 | 0,003755 | 0,357586 Cassette Exon       | 0,13 |
| TC0600001275.mm.1 | 2,3 Syn2                     | PSR0600010080.mm.1 | -2,59 | 0,02782  | 0,505498 Mutually Exclusive  | 0,17 |
| TC0600001275.mm.1 | 2,3 Syn2                     | PSR0600010073.mm.1 | -2,7  | 0,018273 | 0,468043 Alternative 3' Acce | 0,44 |
| TC0600001275.mm.1 | 2,3 Syn2                     | PSR0600010086.mm.1 | -2,83 | 0,011992 | 0,432286 Alternative 5' Donc | 0,21 |
| TC0600001275.mm.1 | 2,3 Syn2                     | PSR0600010065.mm.1 | -2,91 | 0,000981 | 0,31497 Cassette Exon        | 0,14 |
| TC0600001275.mm.1 | 2,3 Syn2                     | PSR0600010074.mm.1 | -3,05 | 0,00377  | 0,357586 Alternative 3' Acce | 0,44 |
| TC0600001275.mm.1 | 2,3 Syn2                     | PSR0600010072.mm.1 | -4,13 | 0,001401 | 0,325997 Alternative 3' Acce | 0,44 |
| TC0600001275.mm.1 | 2,3 Syn2                     | JUC0600005232.mm.1 | -4,74 | 0,000666 | 0,304088                     |      |
| TC1400001849.mm.1 | -1,24 Gm3141; Gm7236; Gm811  | JUC1400007713.mm.1 | 5,12  | 0,04369  | 0,550248                     |      |
| TC0400000057.mm.1 | 1,59 Chd7                    | JUC0400000177.mm.1 | 5,11  | 0,009604 | 0,417256                     |      |
| TC0400000057.mm.1 | 1,59 Chd7                    | PSR0400000383.mm.1 | 2,27  | 0,003292 | 0,354243 Cassette Exon       | 0,14 |
| TC0400000057.mm.1 | 1,59 Chd7                    | PSR0400000381.mm.1 | 2,06  | 0,026804 | 0,502337 Cassette Exon       | 0,21 |
| TC0400000057.mm.1 | 1,59 Chd7                    | PSR0400000384.mm.1 | 2,01  | 0,01301  | 0,439291 Cassette Exon       | 0,11 |
| TC0400000057.mm.1 | 1,59 Chd7                    | PSR0400000349.mm.1 | -2,1  | 0,00863  | 0,408463 Cassette Exon       | 0,1  |
| TC0400000057.mm.1 | 1,59 Chd7                    | JUC0400000202.mm.1 | -3,5  | 0,042028 | 0,546158                     |      |
| TC0200004545.mm.1 | -1,39 Sppl2a                 | PSR0200038889.mm.1 | 5,1   | 0,036555 | 0,531355 Alternative 5' Donc | 0,22 |
| TC0100000471.mm.1 | 1,86 Abi2                    | JUC0100002316.mm.1 | 5,09  | 0,001735 | 0,335996                     |      |
| TC0100000471.mm.1 | 1,86 Abi2                    | JUC0100002315.mm.1 | 4,79  | 0,011774 | 0,430069                     |      |
| TC0100000471.mm.1 | 1,86 Abi2                    | PSR0100003942.mm.1 | 2,2   | 0,009359 | 0,415092 Alternative 3' Acce | 0,12 |
| TC0100000471.mm.1 | 1,86 Abi2                    | PSR0100003930.mm.1 | -2,09 | 0,019329 | 0,473349 Alternative 3' Acce | 0,16 |
| TC0100000471.mm.1 | 1,86 Abi2                    | JUC0100002311.mm.1 | -2,23 | 0,000167 | 0,272566                     |      |
| TC0100000471.mm.1 | 1,86 Abi2                    | JUC0100002309.mm.1 | -2,37 | 0,017917 | 0,466466                     |      |
| TC0100000471.mm.1 | 1,86 Abi2                    | JUC0100002319.mm.1 | -2,39 | 0,023517 | 0,490947                     |      |
| TC0100000471.mm.1 | 1,86 Abi2                    | JUC0100002320.mm.1 | -3,65 | 0,001108 | 0,317328                     |      |
| TC1400000170.mm.1 | -1,08 Sec24c                 | JUC1400000853.mm.1 | 5,09  | 0,012139 | 0,432868                     |      |
| TC0200004662.mm.1 | -1,53 5330413P13Rik; Gm1428; | PSR0200040022.mm.1 | 5,08  | 0,006587 | 0,39213 Alternative 5' Donc  | 0,33 |
| TC0200004662.mm.1 | -1,53 5330413P13Rik; Gm1428; | PSR0200040021.mm.1 | 2,06  | 0,045485 | 0,554313 Alternative 5' Donc | 0,22 |
| TC0700000913.mm.1 | 3,81 Slc17a6                 | JUC0700004161.mm.1 | 5,08  | 0,004667 | 0,370181                     |      |
| TC0700000913.mm.1 | 3,81 Slc17a6                 | JUC0700004165.mm.1 | 4,63  | 0,000719 | 0,306015                     |      |
| TC0700000913.mm.1 | 3,81 Slc17a6                 | PSR0700008269.mm.1 | 2,7   | 0,001542 | 0,330452 Cassette Exon       | 0,19 |
| TC0700000913.mm.1 | 3,81 Slc17a6                 | PSR0700008270.mm.1 | 2,57  | 0,003737 | 0,357586 Cassette Exon       | 0,31 |
| TC0700000913.mm.1 | 3,81 Slc17a6                 | PSR0700008260.mm.1 | -2,04 | 0,013521 | 0,443431 Cassette Exon       | 0,28 |
| TC0700000913.mm.1 | 3,81 Slc17a6                 | PSR0700008264.mm.1 | -2,92 | 0,004356 | 0,365487 Cassette Exon       | 0,22 |
| TC0700000913.mm.1 | 3,81 Slc17a6                 | PSR0700008262.mm.1 | -2,95 | 0,022159 | 0,48561 Cassette Exon        | 0,17 |
| TC0700000913.mm.1 | 3,81 Slc17a6                 | JUC0700004164.mm.1 | -3,33 | 0,000768 | 0,308403                     |      |
| TC0700000913.mm.1 | 3,81 Slc17a6                 | JUC0700004156.mm.1 | -3,38 | 0,011541 | 0,428761                     |      |
| TC0700000913.mm.1 | 3,81 Slc17a6                 | PSR0700008259.mm.1 | -3,63 | 0,020235 | 0,477145 Cassette Exon       | 0,28 |
| TC0300000124.mm.1 | 1,29 Mtf1                    | JUC0300000226.mm.1 | 5,08  | 0,039115 | 0,53847                      |      |
| TC0300000124.mm.1 | 1,29 Mtf1                    | PSR0300000517.mm.1 | -2,07 | 0,011085 | 0,425927 Cassette Exon       | 0,07 |
| TC1900001448.mm.1 | 2,04 Cpeb3                   | JUC1900006892.mm.1 | 5,07  | 0,015234 | 0,452839                     |      |
| TC1900001448.mm.1 | 2,04 Cpeb3                   | JUC1900006889.mm.1 | 2,69  | 0,010542 | 0,422281                     |      |

|                   |                    |                    |       |          |                              |      |
|-------------------|--------------------|--------------------|-------|----------|------------------------------|------|
| TC1900001448.mm.1 | 2,04 Cpeb3         | PSR1900012618.mm.1 | 2,23  | 0,013745 | 0,444758 Cassette Exon       | 0,21 |
| TC1900001448.mm.1 | 2,04 Cpeb3         | PSR1900012630.mm.1 | -2,07 | 0,030407 | 0,513027                     |      |
| TC1900001448.mm.1 | 2,04 Cpeb3         | PSR1900012643.mm.1 | -2,19 | 0,018414 | 0,468484 Cassette Exon       | 0,18 |
| TC1900001448.mm.1 | 2,04 Cpeb3         | PSR1900012622.mm.1 | -2,38 | 0,01785  | 0,466223 Alternative 5' Donc | 0,12 |
| TC1900001448.mm.1 | 2,04 Cpeb3         | PSR1900012616.mm.1 | -2,58 | 0,015204 | 0,452738 Alternative 3' Acce | 0,26 |
| TC1900001448.mm.1 | 2,04 Cpeb3         | JUC1900006902.mm.1 | -2,6  | 0,010014 | 0,418611                     |      |
| TC1900001448.mm.1 | 2,04 Cpeb3         | JUC1900006898.mm.1 | -2,72 | 0,008209 | 0,405909                     |      |
| TC1900001448.mm.1 | 2,04 Cpeb3         | PSR1900012608.mm.1 | -3,41 | 0,006849 | 0,393893 Alternative 3' Acce | 0,42 |
| TC1900001347.mm.1 | -1,3 9930021J03Rik | JUC1900006561.mm.1 | 5,07  | 0,003137 | 0,353892                     |      |
| TC1200001308.mm.1 | 2,8 Ptprn2         | PSR1200009458.mm.1 | 5,05  | 0,001693 | 0,335395 Cassette Exon       | 0,4  |
| TC1200001308.mm.1 | 2,8 Ptprn2         | JUC1200005228.mm.1 | 3,61  | 0,00634  | 0,389463                     |      |
| TC1200001308.mm.1 | 2,8 Ptprn2         | JUC1200005238.mm.1 | 2,78  | 0,002472 | 0,349135                     |      |
| TC1200001308.mm.1 | 2,8 Ptprn2         | PSR1200009468.mm.1 | -2,13 | 0,040469 | 0,542132 Cassette Exon       | 0,09 |
| TC1200001308.mm.1 | 2,8 Ptprn2         | JUC1200005225.mm.1 | -2,25 | 0,024169 | 0,493262                     |      |
| TC1200001308.mm.1 | 2,8 Ptprn2         | PSR1200009479.mm.1 | -2,34 | 0,013744 | 0,444758 Cassette Exon       | 0,2  |
| TC1200001308.mm.1 | 2,8 Ptprn2         | PSR1200009459.mm.1 | -2,4  | 0,031791 | 0,517596 Cassette Exon       | 0,31 |
| TC1200001308.mm.1 | 2,8 Ptprn2         | PSR1200009485.mm.1 | -2,86 | 0,020318 | 0,477245 Cassette Exon       | 0,24 |
| TC1200001308.mm.1 | 2,8 Ptprn2         | JUC1200005229.mm.1 | -3,04 | 0,021312 | 0,481714                     |      |
| TC1200001308.mm.1 | 2,8 Ptprn2         | PSR1200009481.mm.1 | -3,05 | 0,035598 | 0,528887 Cassette Exon       | 0,35 |
| TC1200001308.mm.1 | 2,8 Ptprn2         | PSR1200009480.mm.1 | -3,32 | 0,023255 | 0,490032 Cassette Exon       | 0,21 |
| TC1200001308.mm.1 | 2,8 Ptprn2         | PSR1200009461.mm.1 | -3,45 | 0,024452 | 0,493971                     |      |
| TC1200001308.mm.1 | 2,8 Ptprn2         | JUC1200005242.mm.1 | -3,48 | 0,004074 | 0,361986                     |      |
| TC1200001308.mm.1 | 2,8 Ptprn2         | PSR1200009456.mm.1 | -3,68 | 0,010663 | 0,423012 Cassette Exon       | 0,3  |
| TC1200001308.mm.1 | 2,8 Ptprn2         | PSR1200009482.mm.1 | -3,91 | 0,007437 | 0,399934 Cassette Exon       | 0,49 |
| TC1200001308.mm.1 | 2,8 Ptprn2         | PSR1200009478.mm.1 | -4,47 | 0,006581 | 0,39213 Cassette Exon        | 0,42 |
| TC1200001308.mm.1 | 2,8 Ptprn2         | PSR1200009484.mm.1 | -6,23 | 0,006455 | 0,390284 Cassette Exon       | 0,43 |
| TC1200001308.mm.1 | 2,8 Ptprn2         | JUC1200005248.mm.1 | -6,68 | 0,01206  | 0,432426                     |      |
| TC1200001308.mm.1 | 2,8 Ptprn2         | PSR1200009466.mm.1 | -7,25 | 0,000665 | 0,304044 Alternative 5' Donc | 0,49 |
| TC0400003275.mm.1 | 2,73 Elavl4        | JUC0400013573.mm.1 | 5,05  | 0,001601 | 0,332773                     |      |
| TC0400003275.mm.1 | 2,73 Elavl4        | PSR0400026100.mm.1 | -2,13 | 0,045211 | 0,553586                     |      |
| TC0400003275.mm.1 | 2,73 Elavl4        | PSR0400026119.mm.1 | -2,2  | 0,015593 | 0,454982 Cassette Exon       | 0,03 |
| TC0400003275.mm.1 | 2,73 Elavl4        | PSR0400026127.mm.1 | -2,48 | 0,016731 | 0,460272 Cassette Exon       | 0,14 |
| TC0400003275.mm.1 | 2,73 Elavl4        | PSR0400026126.mm.1 | -3,02 | 0,004732 | 0,370888 Cassette Exon       | 0,19 |
| TC0400003275.mm.1 | 2,73 Elavl4        | PSR0400026128.mm.1 | -3,06 | 0,019453 | 0,474154 Cassette Exon       | 0,22 |
| TC0400003275.mm.1 | 2,73 Elavl4        | PSR0400026122.mm.1 | -3,26 | 0,014101 | 0,447108 Alternative 5' Donc | 0,25 |
| TC0400003275.mm.1 | 2,73 Elavl4        | PSR0400026123.mm.1 | -3,32 | 0,022068 | 0,485366 Cassette Exon       | 0,34 |
| TC0400003275.mm.1 | 2,73 Elavl4        | JUC0400013581.mm.1 | -3,65 | 0,019808 | 0,475245                     |      |
| TC0400003275.mm.1 | 2,73 Elavl4        | PSR0400026129.mm.1 | -3,75 | 0,00864  | 0,408463 Cassette Exon       | 0,22 |
| TC0400003275.mm.1 | 2,73 Elavl4        | JUC0400013588.mm.1 | -3,79 | 0,01425  | 0,447947                     |      |
| TC0400003275.mm.1 | 2,73 Elavl4        | PSR0400026110.mm.1 | -4,02 | 0,00039  | 0,296751 Cassette Exon       | 0,25 |
| TC0400003275.mm.1 | 2,73 Elavl4        | PSR0400026120.mm.1 | -4,18 | 0,005451 | 0,379939 Alternative 5' Donc | 0,29 |
| TC0400003275.mm.1 | 2,73 Elavl4        | PSR0400026121.mm.1 | -4,69 | 0,009925 | 0,418378 Alternative 5' Donc | 0,29 |
| TC0400003275.mm.1 | 2,73 Elavl4        | PSR0400026104.mm.1 | -4,77 | 0,01777  | 0,465467 Alternative 5' Donc | 0,37 |
| TC0400003275.mm.1 | 2,73 Elavl4        | PSR0400026115.mm.1 | -5,54 | 0,003021 | 0,353447 Cassette Exon       | 0,28 |
| TC1500000699.mm.1 | 1,09 Cacna1i       | JUC1500002999.mm.1 | 5,05  | 0,007222 | 0,39826                      |      |
| TC1500000699.mm.1 | 1,09 Cacna1i       | JUC1500003008.mm.1 | 3,78  | 0,013095 | 0,439759                     |      |
| TC1500000699.mm.1 | 1,09 Cacna1i       | JUC1500003007.mm.1 | 2,6   | 0,007805 | 0,403089                     |      |
| TC1500000699.mm.1 | 1,09 Cacna1i       | PSR1500005296.mm.1 | 2,51  | 0,009273 | 0,41476 Alternative 5' Donc  | 0,24 |

|                   |       |                       |                    |       |          |          |                     |      |
|-------------------|-------|-----------------------|--------------------|-------|----------|----------|---------------------|------|
| TC1500000699.mm.1 | 1,09  | Cacna1i               | PSR1500005294.mm.1 | 2,36  | 0,037297 | 0,533573 | Alternative 5' Donc | 0,22 |
| TC1500000699.mm.1 | 1,09  | Cacna1i               | PSR1500005275.mm.1 | 2,25  | 0,000034 | 0,238339 | Cassette Exon       | 0,27 |
| TC1500000699.mm.1 | 1,09  | Cacna1i               | JUC1500003004.mm.1 | 2,21  | 0,013659 | 0,444394 |                     |      |
| TC1500000699.mm.1 | 1,09  | Cacna1i               | PSR1500005272.mm.1 | 2,06  | 0,021881 | 0,484766 | Cassette Exon       | 0,1  |
| TC0300002782.mm.1 | 1,22  | Amy2a4; Amy2a2; Amy2ε | JUC0300011400.mm.1 | 5,04  | 0,000841 | 0,311886 |                     |      |
| TC0300002782.mm.1 | 1,22  | Amy2a4; Amy2a2; Amy2ε | PSR0300021876.mm.1 | 2,51  | 0,041717 | 0,545356 | Cassette Exon       | 0,21 |
| TC0300002782.mm.1 | 1,22  | Amy2a4; Amy2a2; Amy2ε | JUC0300011404.mm.1 | 2,43  | 0,009671 | 0,417554 |                     |      |
| TC0300002783.mm.1 | 1,22  | Amy2a3; Amy2a2; Amy2ε | JUC0300011411.mm.1 | 5,04  | 0,000841 | 0,311886 |                     |      |
| TC0300002783.mm.1 | 1,22  | Amy2a3; Amy2a2; Amy2ε | PSR0300021894.mm.1 | 2,51  | 0,041717 | 0,545356 | Cassette Exon       | 0,21 |
| TC0300002783.mm.1 | 1,22  | Amy2a3; Amy2a2; Amy2ε | JUC0300011415.mm.1 | 2,43  | 0,009671 | 0,417554 |                     |      |
| TC0300002784.mm.1 | 1,22  | Amy2a2; Amy2a3; Amy2ε | JUC0300011422.mm.1 | 5,04  | 0,000841 | 0,311886 |                     |      |
| TC0300002784.mm.1 | 1,22  | Amy2a2; Amy2a3; Amy2ε | PSR0300021912.mm.1 | 2,51  | 0,041717 | 0,545356 | Cassette Exon       | 0,21 |
| TC0300002784.mm.1 | 1,22  | Amy2a2; Amy2a3; Amy2ε | JUC0300011426.mm.1 | 2,43  | 0,009671 | 0,417554 |                     |      |
| TC1600000741.mm.1 | 1,01  | Senp7                 | JUC1600003376.mm.1 | 5,03  | 0,000887 | 0,312707 |                     |      |
| TC1600000741.mm.1 | 1,01  | Senp7                 | JUC1600003386.mm.1 | 2,64  | 0,003354 | 0,354243 |                     |      |
| TC1600000741.mm.1 | 1,01  | Senp7                 | PSR1600006417.mm.1 | 2,24  | 0,00459  | 0,369794 | Cassette Exon       | 0,12 |
| TC1600000741.mm.1 | 1,01  | Senp7                 | JUC1600003384.mm.1 | 2,24  | 0,031397 | 0,516433 |                     |      |
| TC1600000741.mm.1 | 1,01  | Senp7                 | PSR1600006401.mm.1 | 2,05  | 0,039091 | 0,538395 | Cassette Exon       | 0,08 |
| TC1600000117.mm.1 | -1,11 | Clec16a               | JUC1600000446.mm.1 | 5,03  | 0,001262 | 0,322251 |                     |      |
| TC1600000117.mm.1 | -1,11 | Clec16a               | JUC1600000447.mm.1 | 2,4   | 0,035445 | 0,52871  |                     |      |
| TC1500000142.mm.1 | 2,56  | Cdh18                 | JUC1500000687.mm.1 | 5,02  | 0,001519 | 0,330268 |                     |      |
| TC1500000142.mm.1 | 2,56  | Cdh18                 | JUC1500000692.mm.1 | 3,42  | 0,001121 | 0,317328 |                     |      |
| TC1500000142.mm.1 | 2,56  | Cdh18                 | PSR1500001161.mm.1 | 2,87  | 0,00836  | 0,406435 | Alternative 3' Acce | 0,28 |
| TC1500000142.mm.1 | 2,56  | Cdh18                 | PSR1500001173.mm.1 | 2,4   | 0,000459 | 0,298999 | Cassette Exon       | 0,45 |
| TC1500000142.mm.1 | 2,56  | Cdh18                 | PSR1500001181.mm.1 | -2,03 | 0,045291 | 0,553742 | Alternative 5' Donc | 0,18 |
| TC1500000142.mm.1 | 2,56  | Cdh18                 | JUC1500000685.mm.1 | -2,19 | 0,032986 | 0,52136  |                     |      |
| TC1500000142.mm.1 | 2,56  | Cdh18                 | PSR1500001182.mm.1 | -2,2  | 0,017851 | 0,466223 | Alternative 5' Donc | 0,18 |
| TC1500000142.mm.1 | 2,56  | Cdh18                 | PSR1500001177.mm.1 | -2,21 | 0,016664 | 0,460023 | Cassette Exon       | 0,14 |
| TC1500000142.mm.1 | 2,56  | Cdh18                 | PSR1500001179.mm.1 | -2,3  | 0,008746 | 0,409704 | Cassette Exon       | 0,26 |
| TC1500000142.mm.1 | 2,56  | Cdh18                 | PSR1500001160.mm.1 | -2,73 | 0,0255   | 0,497664 | Cassette Exon       | 0,18 |
| TC1500000142.mm.1 | 2,56  | Cdh18                 | PSR1500001172.mm.1 | -3,53 | 0,003336 | 0,354243 | Alternative 3' Acce | 0,51 |
| TC1500000142.mm.1 | 2,56  | Cdh18                 | JUC1500000696.mm.1 | -3,58 | 0,003232 | 0,354243 |                     |      |
| TC1500000142.mm.1 | 2,56  | Cdh18                 | JUC1500000697.mm.1 | -4,05 | 0,001592 | 0,331726 |                     |      |
| TC1500000142.mm.1 | 2,56  | Cdh18                 | PSR1500001176.mm.1 | -6,06 | 0,00043  | 0,297771 | Alternative 5' Donc | 0,45 |
| TC1400001567.mm.1 | 3,05  | Kcnma1                | JUC1400006387.mm.1 | 5,02  | 0,008102 | 0,405071 |                     |      |
| TC1400001567.mm.1 | 3,05  | Kcnma1                | PSR1400011819.mm.1 | 4,95  | 0,010894 | 0,424403 | Cassette Exon       | 0,34 |
| TC1400001567.mm.1 | 3,05  | Kcnma1                | JUC1400006385.mm.1 | 3,56  | 0,000856 | 0,311909 |                     |      |
| TC1400001567.mm.1 | 3,05  | Kcnma1                | JUC1400006391.mm.1 | 3,56  | 0,000856 | 0,311909 |                     |      |
| TC1400001567.mm.1 | 3,05  | Kcnma1                | PSR1400011779.mm.1 | 3,36  | 0,002262 | 0,34578  | Alternative 3' Acce | 0,27 |
| TC1400001567.mm.1 | 3,05  | Kcnma1                | JUC1400006402.mm.1 | 2,97  | 0,027731 | 0,505001 |                     |      |
| TC1400001567.mm.1 | 3,05  | Kcnma1                | JUC1400006393.mm.1 | 2,87  | 0,005413 | 0,379167 |                     |      |
| TC1400001567.mm.1 | 3,05  | Kcnma1                | PSR1400011804.mm.1 | 2,77  | 0,017018 | 0,461709 | Alternative 3' Acce | 0,32 |
| TC1400001567.mm.1 | 3,05  | Kcnma1                | PSR1400011825.mm.1 | 2,41  | 0,00309  | 0,353892 | Cassette Exon       | 0,35 |
| TC1400001567.mm.1 | 3,05  | Kcnma1                | PSR1400011813.mm.1 | 2,08  | 0,017788 | 0,465621 | Cassette Exon       | 0,13 |
| TC1400001567.mm.1 | 3,05  | Kcnma1                | PSR1400011827.mm.1 | -2,02 | 0,046859 | 0,557301 | Cassette Exon       | 0,23 |
| TC1400001567.mm.1 | 3,05  | Kcnma1                | JUC1400006378.mm.1 | -2,19 | 0,048259 | 0,560283 |                     |      |
| TC1400001567.mm.1 | 3,05  | Kcnma1                | PSR1400011833.mm.1 | -2,49 | 0,016412 | 0,458956 |                     |      |
| TC1400001567.mm.1 | 3,05  | Kcnma1                | PSR1400011826.mm.1 | -2,58 | 0,01492  | 0,451919 | Cassette Exon       | 0,37 |

|                   |                     |                    |        |          |          |                          |
|-------------------|---------------------|--------------------|--------|----------|----------|--------------------------|
| TC1400001567.mm.1 | 3,05 Kcnma1         | JUC1400006364.mm.1 | -2,88  | 0,021387 | 0,482022 |                          |
| TC1400001567.mm.1 | 3,05 Kcnma1         | JUC1400006372.mm.1 | -2,96  | 0,036719 | 0,531762 |                          |
| TC1400001567.mm.1 | 3,05 Kcnma1         | JUC1400006369.mm.1 | -2,98  | 0,002586 | 0,349501 |                          |
| TC1400001567.mm.1 | 3,05 Kcnma1         | PSR1400011797.mm.1 | -3,15  | 0,007545 | 0,401384 | Cassette Exon 0,38       |
| TC1400001567.mm.1 | 3,05 Kcnma1         | PSR1400011835.mm.1 | -3,4   | 0,02064  | 0,478859 | Cassette Exon 0,35       |
| TC1400001567.mm.1 | 3,05 Kcnma1         | JUC1400006382.mm.1 | -3,49  | 0,027238 | 0,503642 |                          |
| TC1400001567.mm.1 | 3,05 Kcnma1         | PSR1400011834.mm.1 | -3,55  | 0,017782 | 0,465553 | Cassette Exon 0,05       |
| TC1400001567.mm.1 | 3,05 Kcnma1         | JUC1400006403.mm.1 | -3,74  | 0,040341 | 0,541906 |                          |
| TC1400001567.mm.1 | 3,05 Kcnma1         | PSR1400011828.mm.1 | -3,83  | 0,006753 | 0,393343 | Cassette Exon 0,36       |
| TC1400001567.mm.1 | 3,05 Kcnma1         | JUC1400006370.mm.1 | -3,91  | 0,039504 | 0,539762 |                          |
| TC1400001567.mm.1 | 3,05 Kcnma1         | JUC1400006392.mm.1 | -5,49  | 0,025037 | 0,496091 |                          |
| TC1400001567.mm.1 | 3,05 Kcnma1         | JUC1400006373.mm.1 | -6,7   | 0,00256  | 0,349501 |                          |
| TC1400001567.mm.1 | 3,05 Kcnma1         | JUC1400006397.mm.1 | -7,06  | 0,000617 | 0,304044 |                          |
| TC1000001571.mm.1 | 2,37 Tac2           | JUC1000006094.mm.1 | 5,02   | 0,014774 | 0,450801 |                          |
| TC1000001571.mm.1 | 2,37 Tac2           | PSR1000011309.mm.1 | 2,49   | 0,016909 | 0,460797 | Cassette Exon 0,27       |
| TC1000001571.mm.1 | 2,37 Tac2           | JUC1000006093.mm.1 | 2,08   | 0,032251 | 0,519011 |                          |
| TC1000001571.mm.1 | 2,37 Tac2           | PSR1000011302.mm.1 | -3,44  | 0,003085 | 0,353892 | Cassette Exon 0,36       |
| TC1000001571.mm.1 | 2,37 Tac2           | JUC1000006090.mm.1 | -3,9   | 0,014093 | 0,446971 |                          |
| TC0500002642.mm.1 | 1,26 Ppat           | JUC0500012714.mm.1 | 5,02   | 0,024241 | 0,493294 |                          |
| TC1000001755.mm.1 | -1,3 Utrn           | JUC1000006978.mm.1 | 5,02   | 0,032236 | 0,51899  |                          |
| TC1000001755.mm.1 | -1,3 Utrn           | JUC1000006967.mm.1 | 2,84   | 0,007172 | 0,397855 |                          |
| TC1000001755.mm.1 | -1,3 Utrn           | JUC1000006937.mm.1 | 2,51   | 0,011874 | 0,431125 |                          |
| TC0800002920.mm.1 | 12,81 Calb2         | PSR0800022441.mm.1 | 5,01   | 0,004528 | 0,368648 | Cassette Exon 0,31       |
| TC0800002920.mm.1 | 12,81 Calb2         | JUC0800012244.mm.1 | 3,12   | 0,001373 | 0,32572  |                          |
| TC0800002920.mm.1 | 12,81 Calb2         | PSR0800022444.mm.1 | 2,64   | 0,031347 | 0,516281 | Cassette Exon 0,07       |
| TC0800002920.mm.1 | 12,81 Calb2         | JUC0800012241.mm.1 | 2,29   | 0,022659 | 0,487609 |                          |
| TC0800002920.mm.1 | 12,81 Calb2         | PSR0800022447.mm.1 | -2,36  | 0,000938 | 0,313363 | Cassette Exon 0,03       |
| TC0800002920.mm.1 | 12,81 Calb2         | PSR0800022438.mm.1 | -3,24  | 0,001375 | 0,32572  | Cassette Exon 0,01       |
| TC0800002920.mm.1 | 12,81 Calb2         | JUC0800012242.mm.1 | -4,06  | 0,003674 | 0,357266 |                          |
| TC0800002920.mm.1 | 12,81 Calb2         | PSR0800022448.mm.1 | -6,86  | 0,000435 | 0,297771 | Cassette Exon 0,28       |
| TC0800002920.mm.1 | 12,81 Calb2         | PSR0800022436.mm.1 | -8,07  | 0,002858 | 0,352207 | Cassette Exon 0,41       |
| TC0800002920.mm.1 | 12,81 Calb2         | JUC0800012243.mm.1 | -8,64  | 0,001398 | 0,325997 |                          |
| TC0800002920.mm.1 | 12,81 Calb2         | JUC0800012236.mm.1 | -22,25 | 0,000737 | 0,307808 |                          |
| TC0300003029.mm.1 | -1,03 Gm4862        | PSR0300023899.mm.1 | 5      | 0,010075 | 0,418974 | Alternative 5' Donc 0,47 |
| TC0400003856.mm.1 | 1,52 lgsf21         | JUC0400016512.mm.1 | 5      | 0,03566  | 0,528966 |                          |
| TC0400003856.mm.1 | 1,52 lgsf21         | PSR0400031784.mm.1 | 4,19   | 0,006169 | 0,387873 | Cassette Exon 0,27       |
| TC0400003856.mm.1 | 1,52 lgsf21         | JUC0400016511.mm.1 | 4,12   | 0,003636 | 0,3566   |                          |
| TC0600000294.mm.1 | 1,04 Mkl1n1         | JUC0600001111.mm.1 | 4,99   | 0,00747  | 0,400381 |                          |
| TC0600000294.mm.1 | 1,04 Mkl1n1         | PSR0600002173.mm.1 | 2,51   | 0,000137 | 0,270987 | Cassette Exon 0,21       |
| TC0600000294.mm.1 | 1,04 Mkl1n1         | PSR0600002170.mm.1 | 2,44   | 0,003519 | 0,355749 | Cassette Exon 0,11       |
| TC0600000294.mm.1 | 1,04 Mkl1n1         | JUC0600001095.mm.1 | 2,01   | 0,024111 | 0,49322  |                          |
| TC0400000913.mm.1 | -1,62 Mtap          | JUC0400003117.mm.1 | 4,99   | 0,024768 | 0,495014 |                          |
| TC0X00003059.mm.1 | -1,21 C330013F16Rik | JUC0X00009688.mm.1 | 4,99   | 0,003157 | 0,353892 |                          |
| TC1600000284.mm.1 | 1,47 Ece2           | JUC1600001421.mm.1 | 4,96   | 0,001851 | 0,337414 |                          |
| TC1600000284.mm.1 | 1,47 Ece2           | JUC1600001412.mm.1 | 4,08   | 0,004249 | 0,363417 |                          |
| TC1600000284.mm.1 | 1,47 Ece2           | JUC1600001417.mm.1 | 3,6    | 0,015332 | 0,453763 |                          |
| TC1600000284.mm.1 | 1,47 Ece2           | PSR1600002719.mm.1 | -2,04  | 0,012447 | 0,43528  | Alternative 5' Donc 0,09 |
| TC1600000284.mm.1 | 1,47 Ece2           | PSR1600002708.mm.1 | -2,18  | 0,018427 | 0,468598 | Alternative 3' Acce 0,13 |

|                   |                      |                    |       |          |          |                          |
|-------------------|----------------------|--------------------|-------|----------|----------|--------------------------|
| TC1600000284.mm.1 | 1,47 Ece2            | JUC1600001409.mm.1 | -2,85 | 0,033265 | 0,522243 |                          |
| TC1600000284.mm.1 | 1,47 Ece2            | JUC1600001411.mm.1 | -3,17 | 0,011402 | 0,427549 |                          |
| TC0400002876.mm.1 | 1,35 Ptprd           | JUC0400012285.mm.1 | 4,95  | 0,004966 | 0,373851 |                          |
| TC0400002876.mm.1 | 1,35 Ptprd           | JUC0400012301.mm.1 | 3,28  | 0,000034 | 0,238339 |                          |
| TC0400002876.mm.1 | 1,35 Ptprd           | JUC0400012310.mm.1 | 2,77  | 0,0147   | 0,450341 |                          |
| TC0400002876.mm.1 | 1,35 Ptprd           | JUC0400012279.mm.1 | 2,58  | 0,025852 | 0,498657 |                          |
| TC0400002876.mm.1 | 1,35 Ptprd           | PSR0400023573.mm.1 | 2,38  | 0,040649 | 0,54264  | Cassette Exon 0,15       |
| TC0400002876.mm.1 | 1,35 Ptprd           | JUC0400012284.mm.1 | 2,23  | 0,001758 | 0,335996 |                          |
| TC0400002876.mm.1 | 1,35 Ptprd           | PSR0400023555.mm.1 | 2,07  | 0,036791 | 0,532063 | Cassette Exon 0,12       |
| TC0400002876.mm.1 | 1,35 Ptprd           | PSR0400023571.mm.1 | -2,04 | 0,043563 | 0,550033 | Alternative 3' Acce 0,16 |
| TC1400002303.mm.1 | -1,62 Adam28         | JUC1400009820.mm.1 | 4,95  | 0,01665  | 0,459985 |                          |
| TC1400002303.mm.1 | -1,62 Adam28         | JUC1400009811.mm.1 | 3,05  | 0,001354 | 0,325427 |                          |
| TC1400002303.mm.1 | -1,62 Adam28         | JUC1400009824.mm.1 | 2,02  | 0,030389 | 0,512923 |                          |
| TC1400002303.mm.1 | -1,62 Adam28         | JUC1400009814.mm.1 | -2,12 | 0,016242 | 0,458312 |                          |
| TC0200001836.mm.1 | -1,35 Eif3j2; Eif3j1 | JUC0200007106.mm.1 | 4,95  | 0,007828 | 0,403089 |                          |
| TC0400002606.mm.1 | 3,28 Gabbr2          | JUC0400011033.mm.1 | 4,94  | 0,017415 | 0,46377  |                          |
| TC0400002606.mm.1 | 3,28 Gabbr2          | JUC0400011036.mm.1 | 4,11  | 0,016882 | 0,460797 |                          |
| TC0400002606.mm.1 | 3,28 Gabbr2          | JUC0400011028.mm.1 | 3,53  | 0,002925 | 0,352289 |                          |
| TC0400002606.mm.1 | 3,28 Gabbr2          | JUC0400011042.mm.1 | 3,14  | 0,005951 | 0,385276 |                          |
| TC0400002606.mm.1 | 3,28 Gabbr2          | PSR0400021271.mm.1 | 2,34  | 0,003141 | 0,353892 | Alternative 3' Acce 0,21 |
| TC0400002606.mm.1 | 3,28 Gabbr2          | PSR0400021282.mm.1 | 2,17  | 0,027797 | 0,505406 | Cassette Exon 0,17       |
| TC0400002606.mm.1 | 3,28 Gabbr2          | JUC0400011041.mm.1 | -2,15 | 0,007357 | 0,39938  |                          |
| TC0400002606.mm.1 | 3,28 Gabbr2          | PSR0400021288.mm.1 | -2,53 | 0,01143  | 0,427663 | Cassette Exon 0,17       |
| TC0400002606.mm.1 | 3,28 Gabbr2          | PSR0400021293.mm.1 | -3,43 | 0,000765 | 0,308403 | Cassette Exon 0,15       |
| TC0400002606.mm.1 | 3,28 Gabbr2          | JUC0400011030.mm.1 | -3,74 | 0,000549 | 0,304044 |                          |
| TC0400002606.mm.1 | 3,28 Gabbr2          | JUC0400011025.mm.1 | -4,09 | 0,002581 | 0,349501 |                          |
| TC0400002606.mm.1 | 3,28 Gabbr2          | PSR0400021295.mm.1 | -4,44 | 0,005095 | 0,37571  | Cassette Exon 0,15       |
| TC0400002606.mm.1 | 3,28 Gabbr2          | PSR0400021280.mm.1 | -4,91 | 0,001959 | 0,340561 | Alternative 5' Donc 0,36 |
| TC0400002606.mm.1 | 3,28 Gabbr2          | JUC0400011034.mm.1 | -5,09 | 0,000135 | 0,270905 |                          |
| TC0400002606.mm.1 | 3,28 Gabbr2          | PSR0400021273.mm.1 | -6,95 | 0,001447 | 0,328226 | Cassette Exon 0,41       |
| TC0500003323.mm.1 | 1,81 Wbscr17         | JUC0500016380.mm.1 | 4,94  | 0,023556 | 0,490947 |                          |
| TC0500003323.mm.1 | 1,81 Wbscr17         | PSR0500030083.mm.1 | -2,21 | 0,021679 | 0,48395  | Alternative 5' Donc 0,11 |
| TC0500003323.mm.1 | 1,81 Wbscr17         | JUC0500016377.mm.1 | -2,28 | 0,015413 | 0,454055 |                          |
| TC0500003323.mm.1 | 1,81 Wbscr17         | PSR0500030074.mm.1 | -2,38 | 0,001152 | 0,317344 | Alternative 3' Acce 0,2  |
| TC0100001914.mm.1 | 1,48 Rgs20           | JUC0100008974.mm.1 | 4,93  | 0,009041 | 0,412806 |                          |
| TC0100001914.mm.1 | 1,48 Rgs20           | PSR0100015806.mm.1 | 4,26  | 0,009589 | 0,417183 | Cassette Exon 0,41       |
| TC1300002040.mm.1 | 1,18 Gprin1          | JUC1300006593.mm.1 | 4,93  | 0,004208 | 0,363236 |                          |
| TC0100001379.mm.1 | 3,75 Rgs8            | PSR0100011423.mm.1 | 4,92  | 0,000154 | 0,272178 | Alternative 5' Donc 0,33 |
| TC0100001379.mm.1 | 3,75 Rgs8            | PSR0100011422.mm.1 | 4,1   | 0,001235 | 0,322251 | Alternative 5' Donc 0,46 |
| TC0100001379.mm.1 | 3,75 Rgs8            | PSR0100011412.mm.1 | -2,04 | 0,022746 | 0,487897 | Cassette Exon 0,06       |
| TC0100001379.mm.1 | 3,75 Rgs8            | JUC0100006589.mm.1 | -2,36 | 0,032085 | 0,518469 |                          |
| TC0100001379.mm.1 | 3,75 Rgs8            | PSR0100011415.mm.1 | -2,69 | 0,019885 | 0,475806 | Cassette Exon 0,13       |
| TC0100001379.mm.1 | 3,75 Rgs8            | JUC0100006586.mm.1 | -2,86 | 0,038205 | 0,535805 |                          |
| TC0100001379.mm.1 | 3,75 Rgs8            | PSR0100011401.mm.1 | -3,05 | 0,017374 | 0,463612 |                          |
| TC0100001379.mm.1 | 3,75 Rgs8            | JUC0100006588.mm.1 | -3,43 | 0,023328 | 0,490065 |                          |
| TC0100001379.mm.1 | 3,75 Rgs8            | PSR0100011399.mm.1 | -3,58 | 0,01793  | 0,466466 | Cassette Exon 0,24       |
| TC0100001379.mm.1 | 3,75 Rgs8            | PSR0100011398.mm.1 | -3,62 | 0,006556 | 0,39213  | Cassette Exon 0,26       |
| TC0100001379.mm.1 | 3,75 Rgs8            | PSR0100011403.mm.1 | -3,64 | 0,030575 | 0,513395 |                          |

|                   |                |                    |        |          |                              |      |
|-------------------|----------------|--------------------|--------|----------|------------------------------|------|
| TC0100001379.mm.1 | 3,75 Rgs8      | PSR0100011400.mm.1 | -4,55  | 0,012389 | 0,434939 Cassette Exon       | 0,28 |
| TC0100001379.mm.1 | 3,75 Rgs8      | PSR0100011404.mm.1 | -4,87  | 0,001068 | 0,316419 Alternative 3' Acce | 0,16 |
| TC0100001379.mm.1 | 3,75 Rgs8      | PSR0100011408.mm.1 | -5,03  | 0,019985 | 0,476227 Intron Retention    | 0,36 |
| TC0100001379.mm.1 | 3,75 Rgs8      | PSR0100011402.mm.1 | -5,25  | 0,007972 | 0,403853                     |      |
| TC0100001379.mm.1 | 3,75 Rgs8      | PSR0100011397.mm.1 | -6     | 0,006752 | 0,393343 Cassette Exon       | 0,26 |
| TC0100001379.mm.1 | 3,75 Rgs8      | PSR0100011406.mm.1 | -6,89  | 0,005547 | 0,380675 Alternative 3' Acce | 0,36 |
| TC0100001379.mm.1 | 3,75 Rgs8      | PSR0100011411.mm.1 | -7,57  | 0,001503 | 0,329896 Alternative 3' Acce | 0,29 |
| TC0100001616.mm.1 | 2,01 lgsf9     | PSR0100013455.mm.1 | 4,92   | 0,008133 | 0,405267 Cassette Exon       | 0,31 |
| TC0100001616.mm.1 | 2,01 lgsf9     | JUC0100007598.mm.1 | 2,05   | 0,008574 | 0,40821                      |      |
| TC0100001616.mm.1 | 2,01 lgsf9     | PSR0100013448.mm.1 | -2,09  | 0,0279   | 0,505612 Intron Retention    | 0,23 |
| TC0100001616.mm.1 | 2,01 lgsf9     | PSR0100013476.mm.1 | -2,46  | 0,040012 | 0,541174 Cassette Exon       | 0,15 |
| TC0100001616.mm.1 | 2,01 lgsf9     | PSR0100013468.mm.1 | -2,75  | 0,005591 | 0,381035 Alternative 5' Donc | 0,16 |
| TC0100001616.mm.1 | 2,01 lgsf9     | PSR0100013429.mm.1 | -3,2   | 0,010843 | 0,424161 Cassette Exon       | 0,2  |
| TC0100001616.mm.1 | 2,01 lgsf9     | PSR0100013472.mm.1 | -3,22  | 0,010651 | 0,422925 Cassette Exon       | 0,14 |
| TC0100001616.mm.1 | 2,01 lgsf9     | JUC0100007607.mm.1 | -3,43  | 0,037021 | 0,532502                     |      |
| TC0100001616.mm.1 | 2,01 lgsf9     | JUC0100007596.mm.1 | -3,81  | 0,019942 | 0,476043                     |      |
| TC0X00000732.mm.1 | -1,58 Xlr4e-ps | JUC0X00002537.mm.1 | 4,92   | 0,011609 | 0,429583                     |      |
| TC0X00000732.mm.1 | -1,58 Xlr4e-ps | PSR0X00005054.mm.1 | 2,59   | 0,039416 | 0,539606 Cassette Exon       | 0,28 |
| TC0X00000732.mm.1 | -1,58 Xlr4e-ps | PSR0X00005056.mm.1 | 2,35   | 0,01589  | 0,456526 Cassette Exon       | 0,18 |
| TC0X00000732.mm.1 | -1,58 Xlr4e-ps | JUC0X00002542.mm.1 | 2,04   | 0,005524 | 0,380518                     |      |
| TC1900001205.mm.1 | -1,07 Cep78    | JUC1900005979.mm.1 | 4,92   | 0,019793 | 0,475212                     |      |
| TC1900001205.mm.1 | -1,07 Cep78    | JUC1900005966.mm.1 | 2,61   | 0,003188 | 0,354243                     |      |
| TC1900001205.mm.1 | -1,07 Cep78    | PSR1900010972.mm.1 | 2,07   | 0,043407 | 0,549603 Intron Retention    | 0,24 |
| TC1000000811.mm.1 | -1,13 Gzmm     | JUC1000003187.mm.1 | 4,92   | 0,000565 | 0,304044                     |      |
| TC1000000811.mm.1 | -1,13 Gzmm     | JUC1000003188.mm.1 | 2,3    | 0,007104 | 0,396897                     |      |
| TC1000000332.mm.1 | 1,25 Rev3l     | PSR1000002273.mm.1 | 4,91   | 0,015653 | 0,455329 Alternative 5' Donc | 0,48 |
| TC1000000332.mm.1 | 1,25 Rev3l     | JUC1000001250.mm.1 | -4,49  | 0,004728 | 0,370888                     |      |
| TC1100003136.mm.1 | 16,28 Aipl1    | JUC1100015200.mm.1 | 4,91   | 0,017837 | 0,466096                     |      |
| TC1100003136.mm.1 | 16,28 Aipl1    | JUC1100015199.mm.1 | -2,62  | 0,003243 | 0,354243                     |      |
| TC1100003136.mm.1 | 16,28 Aipl1    | PSR1100029026.mm.1 | -7,97  | 0,000173 | 0,277789 Cassette Exon       | 0,44 |
| TC1100003136.mm.1 | 16,28 Aipl1    | JUC1100015203.mm.1 | -8,8   | 0,005584 | 0,381035                     |      |
| TC1100003136.mm.1 | 16,28 Aipl1    | JUC1100015202.mm.1 | -19,04 | 0,002731 | 0,349612                     |      |
| TC1100003136.mm.1 | 16,28 Aipl1    | PSR1100029020.mm.1 | -20,71 | 0,002073 | 0,342181 Alternative 3' Acce | 0,44 |
| TC1600001008.mm.1 | 1,78 Son       | JUC1600004073.mm.1 | 4,91   | 0,002181 | 0,344453                     |      |
| TC0200005041.mm.1 | 2,29 Gm14204   | PSR0200043146.mm.1 | 4,9    | 0,021718 | 0,484104 Cassette Exon       | 0,28 |
| TC0200005041.mm.1 | 2,29 Gm14204   | PSR0200043144.mm.1 | -2,72  | 0,049545 | 0,563325 Alternative 3' Acce | 0,18 |
| TC0200005041.mm.1 | 2,29 Gm14204   | PSR0200043153.mm.1 | -4,07  | 0,006359 | 0,389469 Cassette Exon       | 0,28 |
| TC0200005041.mm.1 | 2,29 Gm14204   | PSR0200043154.mm.1 | -4,28  | 0,04474  | 0,552331 Cassette Exon       | 0,28 |
| TC1500001750.mm.1 | -1,54 Eef1d    | JUC1500007516.mm.1 | 4,9    | 0,000633 | 0,304044                     |      |
| TC1500001750.mm.1 | -1,54 Eef1d    | JUC1500007512.mm.1 | 2,75   | 0,021971 | 0,485125                     |      |
| TC1100003997.mm.1 | 1,91 Abca8b    | JUC1100019575.mm.1 | 4,89   | 0,002765 | 0,350231                     |      |
| TC1100003997.mm.1 | 1,91 Abca8b    | JUC1100019547.mm.1 | 2,91   | 0,002674 | 0,349612                     |      |
| TC1100003997.mm.1 | 1,91 Abca8b    | PSR1100037432.mm.1 | -2,01  | 0,000498 | 0,300857 Cassette Exon       | 0,08 |
| TC1100003997.mm.1 | 1,91 Abca8b    | PSR1100037412.mm.1 | -2,05  | 0,005943 | 0,385178 Alternative 3' Acce | 0,17 |
| TC1100003997.mm.1 | 1,91 Abca8b    | JUC1100019582.mm.1 | -2,06  | 0,008424 | 0,406611                     |      |
| TC1100003997.mm.1 | 1,91 Abca8b    | JUC1100019552.mm.1 | -2,12  | 0,005052 | 0,374795                     |      |
| TC1100003997.mm.1 | 1,91 Abca8b    | PSR1100037458.mm.1 | -2,3   | 0,002659 | 0,349612 Cassette Exon       | 0,14 |
| TC1100003997.mm.1 | 1,91 Abca8b    | JUC1100019561.mm.1 | -2,72  | 0,024517 | 0,493992                     |      |

|                   |                            |                    |       |          |                              |  |      |
|-------------------|----------------------------|--------------------|-------|----------|------------------------------|--|------|
| TC1100003997.mm.1 | 1,91 Abca8b                | JUC1100019573.mm.1 | -3,47 | 0,040916 | 0,543423                     |  |      |
| TC0200001859.mm.1 | -1,4 Sqrld                 | JUC0200007255.mm.1 | 4,89  | 0,019651 | 0,474887                     |  |      |
| TC0400001233.mm.1 | -1,76 Efcab14              | JUC0400004736.mm.1 | 4,89  | 0,032477 | 0,519641                     |  |      |
| TC0200000850.mm.1 | 3,02 Galnt13               | PSR0200006942.mm.1 | 4,88  | 0,014278 | 0,448073 Alternative 5' Donc |  | 0,48 |
| TC0200000850.mm.1 | 3,02 Galnt13               | PSR0200006929.mm.1 | 3,37  | 0,000014 | 0,18968 Cassette Exon        |  | 0,27 |
| TC0200000850.mm.1 | 3,02 Galnt13               | PSR0200006937.mm.1 | 2,56  | 0,024576 | 0,494301                     |  |      |
| TC0200000850.mm.1 | 3,02 Galnt13               | JUC0200003524.mm.1 | 2,45  | 0,021887 | 0,484824                     |  |      |
| TC0200000850.mm.1 | 3,02 Galnt13               | PSR0200006946.mm.1 | -2,14 | 0,02051  | 0,47825 Alternative 5' Donc  |  | 0,33 |
| TC0200000850.mm.1 | 3,02 Galnt13               | PSR0200006927.mm.1 | -2,32 | 0,006016 | 0,386586 Alternative 3' Acce |  | 0,21 |
| TC0200000850.mm.1 | 3,02 Galnt13               | PSR0200006932.mm.1 | -2,5  | 0,011308 | 0,427133 Cassette Exon       |  | 0,14 |
| TC0200000850.mm.1 | 3,02 Galnt13               | PSR0200006924.mm.1 | -3,69 | 0,010633 | 0,422841                     |  |      |
| TC0200000850.mm.1 | 3,02 Galnt13               | PSR0200006918.mm.1 | -3,76 | 0,002798 | 0,352011 Alternative 3' Acce |  | 0,15 |
| TC0200000850.mm.1 | 3,02 Galnt13               | PSR0200006926.mm.1 | -4,06 | 0,017346 | 0,46353 Cassette Exon        |  | 0,28 |
| TC0200000850.mm.1 | 3,02 Galnt13               | PSR0200006921.mm.1 | -4,18 | 0,003127 | 0,353892 Alternative 3' Acce |  | 0,15 |
| TC0200000850.mm.1 | 3,02 Galnt13               | PSR0200006947.mm.1 | -4,49 | 0,000453 | 0,298307 Alternative 5' Donc |  | 0,33 |
| TC0200000850.mm.1 | 3,02 Galnt13               | JUC0200003519.mm.1 | -4,98 | 0,012636 | 0,436161                     |  |      |
| TC0200000850.mm.1 | 3,02 Galnt13               | JUC0200003523.mm.1 | -5,26 | 0,000841 | 0,311886                     |  |      |
| TC0200000850.mm.1 | 3,02 Galnt13               | PSR0200006925.mm.1 | -5,43 | 0,000729 | 0,306408 Alternative 5' Donc |  | 0,05 |
| TC0200000850.mm.1 | 3,02 Galnt13               | JUC0200003521.mm.1 | -5,71 | 0,004908 | 0,372662                     |  |      |
| TC0200000850.mm.1 | 3,02 Galnt13               | PSR0200006938.mm.1 | -5,88 | 0,002679 | 0,349612 Alternative 5' Donc |  | 0,34 |
| TC0200000850.mm.1 | 3,02 Galnt13               | PSR0200006920.mm.1 | -5,93 | 0,003272 | 0,354243 Alternative 3' Acce |  | 0,15 |
| TC0300002781.mm.1 | 1,13 Amy2a5; Amy2a2; Amy2c | JUC0300011388.mm.1 | 4,88  | 0,000191 | 0,28803                      |  |      |
| TC0300002781.mm.1 | 1,13 Amy2a5; Amy2a2; Amy2c | PSR0300021852.mm.1 | 3,17  | 0,047788 | 0,559217 Cassette Exon       |  | 0,19 |
| TC0300002781.mm.1 | 1,13 Amy2a5; Amy2a2; Amy2c | JUC0300011387.mm.1 | 2,45  | 0,006879 | 0,394271                     |  |      |
| TC0300002781.mm.1 | 1,13 Amy2a5; Amy2a2; Amy2c | PSR0300021854.mm.1 | 2,14  | 0,021124 | 0,480611 Cassette Exon       |  | 0,17 |
| TC0200003533.mm.1 | 1,32 Cacnb4                | JUC0200015312.mm.1 | 4,88  | 0,012453 | 0,43528                      |  |      |
| TC0200003533.mm.1 | 1,32 Cacnb4                | PSR0200030223.mm.1 | -2,19 | 0,023732 | 0,491573 Alternative 5' Donc |  | 0,18 |
| TC0100003129.mm.1 | -1,39 Nav1                 | JUC0100014442.mm.1 | 4,87  | 0,032942 | 0,52122                      |  |      |
| TC0100003129.mm.1 | -1,39 Nav1                 | JUC0100014428.mm.1 | 3,19  | 0,027942 | 0,505612                     |  |      |
| TC0100003129.mm.1 | -1,39 Nav1                 | JUC0100014427.mm.1 | 2,97  | 0,018884 | 0,47116                      |  |      |
| TC0100003129.mm.1 | -1,39 Nav1                 | JUC0100014408.mm.1 | 2,45  | 0,012191 | 0,433076                     |  |      |
| TC0700001423.mm.1 | 1,12 Fchsd2                | JUC0700006299.mm.1 | 4,87  | 0,031896 | 0,518021                     |  |      |
| TC1200000852.mm.1 | 4,36 Esrrb                 | JUC1200003524.mm.1 | 4,86  | 0,009989 | 0,418456                     |  |      |
| TC1200000852.mm.1 | 4,36 Esrrb                 | PSR1200006245.mm.1 | 3,95  | 0,025526 | 0,497712                     |  |      |
| TC1200000852.mm.1 | 4,36 Esrrb                 | PSR1200006249.mm.1 | 2,71  | 0,002478 | 0,349135 Mutually Exclusive  |  | 0,4  |
| TC1200000852.mm.1 | 4,36 Esrrb                 | JUC1200003527.mm.1 | 2,22  | 0,015084 | 0,452418                     |  |      |
| TC1200000852.mm.1 | 4,36 Esrrb                 | PSR1200006251.mm.1 | -2,66 | 0,004642 | 0,370181 Cassette Exon       |  | 0,15 |
| TC1200000852.mm.1 | 4,36 Esrrb                 | PSR1200006253.mm.1 | -3,44 | 0,0036   | 0,356223 Cassette Exon       |  | 0,16 |
| TC1200000852.mm.1 | 4,36 Esrrb                 | JUC1200003521.mm.1 | -3,76 | 0,018125 | 0,467234                     |  |      |
| TC1200000852.mm.1 | 4,36 Esrrb                 | JUC1200003528.mm.1 | -4,03 | 0,008129 | 0,405267                     |  |      |
| TC1200000852.mm.1 | 4,36 Esrrb                 | PSR1200006256.mm.1 | -4,3  | 0,00219  | 0,344463 Cassette Exon       |  | 0,25 |
| TC1200000852.mm.1 | 4,36 Esrrb                 | PSR1200006244.mm.1 | -4,96 | 0,002525 | 0,349501 Alternative 3' Acce |  | 0,48 |
| TC1200000852.mm.1 | 4,36 Esrrb                 | JUC1200003530.mm.1 | -5,23 | 0,001346 | 0,325349                     |  |      |
| TC1200000852.mm.1 | 4,36 Esrrb                 | PSR1200006250.mm.1 | -5,3  | 0,01031  | 0,420505 Mutually Exclusive  |  | 0,4  |
| TC1200000852.mm.1 | 4,36 Esrrb                 | JUC1200003525.mm.1 | -5,39 | 0,003225 | 0,354243                     |  |      |
| TC1200000852.mm.1 | 4,36 Esrrb                 | PSR1200006243.mm.1 | -5,94 | 0,001341 | 0,325349 Cassette Exon       |  | 0,4  |
| TC1200000852.mm.1 | 4,36 Esrrb                 | JUC1200003529.mm.1 | -8,53 | 0,000752 | 0,308185                     |  |      |
| TC1200000852.mm.1 | 4,36 Esrrb                 | PSR1200006247.mm.1 | -9,46 | 0,004771 | 0,371044 Alternative 3' Acce |  | 0,34 |



|                   |       |                  |                    |       |          |          |                     |      |
|-------------------|-------|------------------|--------------------|-------|----------|----------|---------------------|------|
| TC1700000596.mm.1 | 1,93  | BC033916; Gm7029 | PSR1700005500.mm.1 | 4,85  | 0,001856 | 0,337543 | Cassette Exon       | 0,33 |
| TC1700000596.mm.1 | 1,93  | BC033916; Gm7029 | JUC1700003016.mm.1 | 2,09  | 0,034244 | 0,525168 |                     |      |
| TC1700000596.mm.1 | 1,93  | BC033916; Gm7029 | JUC1700003019.mm.1 | 2,09  | 0,034244 | 0,525168 |                     |      |
| TC1700000596.mm.1 | 1,93  | BC033916; Gm7029 | PSR1700005489.mm.1 | -2,08 | 0,034025 | 0,524517 | Cassette Exon       | 0,26 |
| TC1700000596.mm.1 | 1,93  | BC033916; Gm7029 | PSR1700005495.mm.1 | -2,52 | 0,019443 | 0,474116 | Cassette Exon       | 0,22 |
| TC1700000596.mm.1 | 1,93  | BC033916; Gm7029 | JUC1700003021.mm.1 | -2,6  | 0,016712 | 0,460199 |                     |      |
| TC1700000596.mm.1 | 1,93  | BC033916; Gm7029 | JUC1700003024.mm.1 | -3,44 | 0,025496 | 0,497664 |                     |      |
| TC1700000596.mm.1 | 1,93  | BC033916; Gm7029 | PSR1700005487.mm.1 | -3,47 | 0,012973 | 0,439245 | Cassette Exon       | 0,24 |
| TC1700000596.mm.1 | 1,93  | BC033916; Gm7029 | PSR1700005497.mm.1 | -3,47 | 0,012973 | 0,439245 | Cassette Exon       | 0,15 |
| TC1700000596.mm.1 | 1,93  | BC033916; Gm7029 | JUC1700003025.mm.1 | -5,34 | 0,011728 | 0,429969 |                     |      |
| TC0400002768.mm.1 | -1,05 | Mup1             | JUC0400011752.mm.1 | 4,85  | 0,045543 | 0,554382 |                     |      |
| TC0X00003185.mm.1 | -1,18 | Ribc1            | JUC0X00010111.mm.1 | 4,85  | 0,004509 | 0,368648 |                     |      |
| TC1000002408.mm.1 | 4,62  | Pcbp3            | JUC1000009564.mm.1 | 4,84  | 0,008568 | 0,40821  |                     |      |
| TC1000002408.mm.1 | 4,62  | Pcbp3            | PSR1000017450.mm.1 | 2,55  | 0,00238  | 0,348564 | Cassette Exon       | 0,3  |
| TC1000002408.mm.1 | 4,62  | Pcbp3            | JUC1000009559.mm.1 | 2,06  | 0,014226 | 0,447947 |                     |      |
| TC1000002408.mm.1 | 4,62  | Pcbp3            | PSR1000017437.mm.1 | -2,02 | 0,015312 | 0,453561 | Cassette Exon       | 0,13 |
| TC1000002408.mm.1 | 4,62  | Pcbp3            | JUC1000009557.mm.1 | -2,18 | 0,011491 | 0,42815  |                     |      |
| TC1000002408.mm.1 | 4,62  | Pcbp3            | PSR1000017452.mm.1 | -2,32 | 0,044598 | 0,552057 | Cassette Exon       | 0,12 |
| TC1000002408.mm.1 | 4,62  | Pcbp3            | JUC1000009563.mm.1 | -2,66 | 0,011019 | 0,425624 |                     |      |
| TC1000002408.mm.1 | 4,62  | Pcbp3            | JUC1000009568.mm.1 | -2,71 | 0,005384 | 0,378801 |                     |      |
| TC1000002408.mm.1 | 4,62  | Pcbp3            | JUC1000009571.mm.1 | -2,8  | 0,049687 | 0,563531 |                     |      |
| TC1000002408.mm.1 | 4,62  | Pcbp3            | PSR1000017448.mm.1 | -2,86 | 0,001483 | 0,329081 | Cassette Exon       | 0,45 |
| TC1000002408.mm.1 | 4,62  | Pcbp3            | JUC1000009581.mm.1 | -3,03 | 0,030345 | 0,512923 |                     |      |
| TC1000002408.mm.1 | 4,62  | Pcbp3            | JUC1000009575.mm.1 | -3,04 | 0,037415 | 0,533831 |                     |      |
| TC1000002408.mm.1 | 4,62  | Pcbp3            | PSR1000017433.mm.1 | -3,36 | 0,008326 | 0,406313 | Cassette Exon       | 0,36 |
| TC1000002408.mm.1 | 4,62  | Pcbp3            | PSR1000017453.mm.1 | -3,41 | 0,021171 | 0,480978 | Cassette Exon       | 0,15 |
| TC1000002408.mm.1 | 4,62  | Pcbp3            | PSR1000017449.mm.1 | -3,54 | 0,012749 | 0,436821 | Cassette Exon       | 0,53 |
| TC1000002408.mm.1 | 4,62  | Pcbp3            | PSR1000017459.mm.1 | -4,74 | 0,008456 | 0,406611 | Cassette Exon       | 0,28 |
| TC1000002408.mm.1 | 4,62  | Pcbp3            | JUC1000009572.mm.1 | -5,93 | 0,001251 | 0,322251 |                     |      |
| TC1200002045.mm.1 | 3,02  | Dpf3             | PSR1200014049.mm.1 | 4,83  | 0,001397 | 0,325997 | Alternative 5' Donc | 0,6  |
| TC1200002045.mm.1 | 3,02  | Dpf3             | JUC1200007729.mm.1 | 3,76  | 0,004818 | 0,371408 |                     |      |
| TC1200002045.mm.1 | 3,02  | Dpf3             | PSR1200014042.mm.1 | 2,78  | 0,002308 | 0,346468 | Alternative 5' Donc | 0,28 |
| TC1200002045.mm.1 | 3,02  | Dpf3             | JUC1200007730.mm.1 | -2,11 | 0,025397 | 0,497403 |                     |      |
| TC1200002045.mm.1 | 3,02  | Dpf3             | JUC1200007725.mm.1 | -3,14 | 0,032059 | 0,518469 |                     |      |
| TC1200002045.mm.1 | 3,02  | Dpf3             | JUC1200007739.mm.1 | -3,2  | 0,033447 | 0,522793 |                     |      |
| TC1200002045.mm.1 | 3,02  | Dpf3             | PSR1200014048.mm.1 | -3,25 | 0,003148 | 0,353892 | Cassette Exon       | 0,25 |
| TC1200002045.mm.1 | 3,02  | Dpf3             | PSR1200014061.mm.1 | -3,75 | 0,003784 | 0,357586 | Cassette Exon       | 0,23 |
| TC1200002045.mm.1 | 3,02  | Dpf3             | PSR1200014059.mm.1 | -4,49 | 0,002911 | 0,352289 | Cassette Exon       | 0,41 |
| TC1200002045.mm.1 | 3,02  | Dpf3             | JUC1200007735.mm.1 | -7,9  | 0,000596 | 0,304044 |                     |      |
| TC1100000033.mm.1 | -1,33 | Sec14l3          | JUC1100000186.mm.1 | 4,83  | 0,021419 | 0,482126 |                     |      |
| TC0100002606.mm.1 | 4,1   | Ptprn            | JUC0100012029.mm.1 | 4,82  | 0,005751 | 0,383101 |                     |      |
| TC0100002606.mm.1 | 4,1   | Ptprn            | JUC0100012012.mm.1 | 3,38  | 0,005115 | 0,376246 |                     |      |
| TC0100002606.mm.1 | 4,1   | Ptprn            | PSR0100021227.mm.1 | 2,92  | 0,004277 | 0,363899 | Cassette Exon       | 0,06 |
| TC0100002606.mm.1 | 4,1   | Ptprn            | PSR0100021217.mm.1 | 2,67  | 0,02705  | 0,502979 | Cassette Exon       | 0,09 |
| TC0100002606.mm.1 | 4,1   | Ptprn            | JUC0100012013.mm.1 | 2,63  | 0,022124 | 0,485558 |                     |      |
| TC0100002606.mm.1 | 4,1   | Ptprn            | JUC0100012016.mm.1 | 2,56  | 0,000436 | 0,297771 |                     |      |
| TC0100002606.mm.1 | 4,1   | Ptprn            | JUC0100012026.mm.1 | 2,29  | 0,008322 | 0,406313 |                     |      |
| TC0100002606.mm.1 | 4,1   | Ptprn            | JUC0100012019.mm.1 | 2,22  | 0,018345 | 0,468287 |                     |      |

|                   |                 |                    |       |          |          |                          |
|-------------------|-----------------|--------------------|-------|----------|----------|--------------------------|
| TC0100002606.mm.1 | 4,1 Ptprn       | PSR0100021216.mm.1 | 2,12  | 0,023568 | 0,490947 |                          |
| TC0100002606.mm.1 | 4,1 Ptprn       | PSR0100021210.mm.1 | -2,01 | 0,01383  | 0,445221 | Cassette Exon 0,36       |
| TC0100002606.mm.1 | 4,1 Ptprn       | PSR0100021213.mm.1 | -2,41 | 0,000072 | 0,251428 | Cassette Exon 0,1        |
| TC0100002606.mm.1 | 4,1 Ptprn       | PSR0100021212.mm.1 | -2,65 | 0,006125 | 0,387351 | Cassette Exon 0,06       |
| TC0100002606.mm.1 | 4,1 Ptprn       | JUC0100012023.mm.1 | -2,91 | 0,003838 | 0,358714 |                          |
| TC0100002606.mm.1 | 4,1 Ptprn       | PSR0100021207.mm.1 | -3    | 0,001466 | 0,329023 | Cassette Exon 0,27       |
| TC0100002606.mm.1 | 4,1 Ptprn       | JUC0100012014.mm.1 | -3,61 | 0,01756  | 0,464258 |                          |
| TC0100002606.mm.1 | 4,1 Ptprn       | JUC0100012017.mm.1 | -4,17 | 0,001623 | 0,332831 |                          |
| TC0100002606.mm.1 | 4,1 Ptprn       | JUC0100012018.mm.1 | -4,27 | 0,014102 | 0,447108 |                          |
| TC0100002606.mm.1 | 4,1 Ptprn       | JUC0100012022.mm.1 | -4,51 | 0,001864 | 0,337974 |                          |
| TC0100002606.mm.1 | 4,1 Ptprn       | JUC0100012033.mm.1 | -4,92 | 0,000264 | 0,28803  |                          |
| TC0100002606.mm.1 | 4,1 Ptprn       | PSR0100021218.mm.1 | -5,09 | 0,000334 | 0,28927  | Alternative 3' Acce 0,31 |
| TC0100002606.mm.1 | 4,1 Ptprn       | PSR0100021228.mm.1 | -6,86 | 0,000656 | 0,304044 | Cassette Exon 0,41       |
| TC1000001679.mm.1 | 1,71 Syne1      | JUC1000006622.mm.1 | 4,82  | 0,045397 | 0,554085 |                          |
| TC1000001679.mm.1 | 1,71 Syne1      | JUC1000006580.mm.1 | 2,72  | 0,006539 | 0,391916 |                          |
| TC1000001679.mm.1 | 1,71 Syne1      | PSR1000012193.mm.1 | -2,31 | 0,010403 | 0,421477 | Cassette Exon 0,15       |
| TC1000001679.mm.1 | 1,71 Syne1      | PSR1000012215.mm.1 | -2,4  | 0,010377 | 0,421341 | Cassette Exon 0,2        |
| TC1000001679.mm.1 | 1,71 Syne1      | JUC1000006621.mm.1 | -2,53 | 0,011649 | 0,42985  |                          |
| TC1300000726.mm.1 | 1,07 Spata31d1b | JUC1300002515.mm.1 | 4,82  | 0,040973 | 0,543536 |                          |
| TC0100003264.mm.1 | 1,33 Rgl1       | JUC0100015106.mm.1 | 4,82  | 0,037233 | 0,533373 |                          |
| TC1800000322.mm.1 | 1,15 Psd2       | JUC1800001403.mm.1 | 4,81  | 0,029508 | 0,510135 |                          |
| TC1800000322.mm.1 | 1,15 Psd2       | JUC1800001393.mm.1 | 2,09  | 0,028948 | 0,508766 |                          |
| TC0400002977.mm.1 | 1,06 Haus6      | JUC0400012584.mm.1 | 4,8   | 0,014536 | 0,449545 |                          |
| TC1200001010.mm.1 | 5,39 Slc24a4    | JUC1200003953.mm.1 | 4,78  | 0,000081 | 0,25272  |                          |
| TC1200001010.mm.1 | 5,39 Slc24a4    | PSR1200007105.mm.1 | 3,65  | 0,036343 | 0,530566 | Cassette Exon 0,09       |
| TC1200001010.mm.1 | 5,39 Slc24a4    | JUC1200003966.mm.1 | 2,98  | 0,024341 | 0,49362  |                          |
| TC1200001010.mm.1 | 5,39 Slc24a4    | PSR1200007097.mm.1 | 2,45  | 0,000875 | 0,311909 | Cassette Exon 0,3        |
| TC1200001010.mm.1 | 5,39 Slc24a4    | JUC1200003955.mm.1 | 2,32  | 0,023843 | 0,491997 |                          |
| TC1200001010.mm.1 | 5,39 Slc24a4    | PSR1200007115.mm.1 | 2,18  | 0,001717 | 0,335996 | Alternative 5' Donc 0,1  |
| TC1200001010.mm.1 | 5,39 Slc24a4    | PSR1200007112.mm.1 | -2,08 | 0,000493 | 0,299348 | Alternative 3' Acce 0,1  |
| TC1200001010.mm.1 | 5,39 Slc24a4    | PSR1200007110.mm.1 | -2,26 | 0,001793 | 0,336311 | Cassette Exon 0,29       |
| TC1200001010.mm.1 | 5,39 Slc24a4    | PSR1200007113.mm.1 | -2,29 | 0,016017 | 0,457051 | Intron Retention 0,19    |
| TC1200001010.mm.1 | 5,39 Slc24a4    | PSR1200007100.mm.1 | -2,54 | 0,03271  | 0,520439 | Cassette Exon 0,21       |
| TC1200001010.mm.1 | 5,39 Slc24a4    | PSR1200007109.mm.1 | -2,58 | 0,001844 | 0,337414 | Cassette Exon 0,22       |
| TC1200001010.mm.1 | 5,39 Slc24a4    | JUC1200003964.mm.1 | -2,58 | 0,0033   | 0,354243 |                          |
| TC1200001010.mm.1 | 5,39 Slc24a4    | PSR1200007094.mm.1 | -2,97 | 0,000997 | 0,316361 | Alternative 3' Acce 0,39 |
| TC1200001010.mm.1 | 5,39 Slc24a4    | JUC1200003957.mm.1 | -3,22 | 0,006131 | 0,387388 |                          |
| TC1200001010.mm.1 | 5,39 Slc24a4    | JUC1200003965.mm.1 | -3,24 | 0,010201 | 0,419711 |                          |
| TC1200001010.mm.1 | 5,39 Slc24a4    | JUC1200003959.mm.1 | -3,43 | 0,000589 | 0,304044 |                          |
| TC1200001010.mm.1 | 5,39 Slc24a4    | PSR1200007096.mm.1 | -3,72 | 0,010417 | 0,42148  | Cassette Exon 0,22       |
| TC1200001010.mm.1 | 5,39 Slc24a4    | JUC1200003956.mm.1 | -3,86 | 0,003234 | 0,354243 |                          |
| TC1200001010.mm.1 | 5,39 Slc24a4    | JUC1200003967.mm.1 | -4,35 | 0,019402 | 0,473802 |                          |
| TC1200001010.mm.1 | 5,39 Slc24a4    | JUC1200003961.mm.1 | -4,58 | 0,015436 | 0,454229 |                          |
| TC1200001010.mm.1 | 5,39 Slc24a4    | PSR1200007093.mm.1 | -7,07 | 0,007721 | 0,402552 | Alternative 3' Acce 0,39 |
| TC1600000771.mm.1 | 2,23 Gabrr3     | JUC1600003545.mm.1 | 4,78  | 0,010465 | 0,421696 |                          |
| TC1600000771.mm.1 | 2,23 Gabrr3     | PSR1600006675.mm.1 | -2,48 | 0,00832  | 0,406313 | Cassette Exon 0,27       |
| TC1600000771.mm.1 | 2,23 Gabrr3     | PSR1600006674.mm.1 | -2,6  | 0,016659 | 0,460023 | Cassette Exon 0,27       |
| TC1600000771.mm.1 | 2,23 Gabrr3     | JUC1600003542.mm.1 | -3,72 | 0,02122  | 0,481286 |                          |

|                   |                       |                    |       |          |                              |  |      |
|-------------------|-----------------------|--------------------|-------|----------|------------------------------|--|------|
| TC1600000771.mm.1 | 2,23 Gabrr3           | JUC1600003548.mm.1 | -3,85 | 0,013029 | 0,439367                     |  |      |
| TC0100000551.mm.1 | 3,97 Map2; A730034C02 | JUC0100002615.mm.1 | 4,77  | 0,029346 | 0,509981                     |  |      |
| TC0100000551.mm.1 | 3,97 Map2; A730034C02 | PSR0100004455.mm.1 | 4,37  | 0,017194 | 0,462491                     |  |      |
| TC0100000551.mm.1 | 3,97 Map2; A730034C02 | JUC0100002609.mm.1 | -2,44 | 0,007323 | 0,398968                     |  |      |
| TC0100000551.mm.1 | 3,97 Map2; A730034C02 | PSR0100004477.mm.1 | -2,47 | 0,007363 | 0,39938 Cassette Exon        |  | 0,12 |
| TC0100000551.mm.1 | 3,97 Map2; A730034C02 | PSR0100004450.mm.1 | -2,49 | 0,001198 | 0,321568 Cassette Exon       |  | 0,24 |
| TC0100000551.mm.1 | 3,97 Map2; A730034C02 | JUC0100002597.mm.1 | -2,49 | 0,012326 | 0,434392                     |  |      |
| TC0100000551.mm.1 | 3,97 Map2; A730034C02 | PSR0100004453.mm.1 | -2,54 | 0,00054  | 0,304044 Alternative 3' Acce |  | 0,33 |
| TC0100000551.mm.1 | 3,97 Map2; A730034C02 | PSR0100004443.mm.1 | -2,79 | 0,032532 | 0,519949 Alternative 3' Acce |  | 0,03 |
| TC0100000551.mm.1 | 3,97 Map2; A730034C02 | PSR0100004457.mm.1 | -2,8  | 0,036357 | 0,530624 Intron Retention    |  | 0,5  |
| TC0100000551.mm.1 | 3,97 Map2; A730034C02 | PSR0100004480.mm.1 | -2,94 | 0,020753 | 0,479248 Alternative 5' Donc |  | 0,21 |
| TC0100000551.mm.1 | 3,97 Map2; A730034C02 | JUC0100002619.mm.1 | -2,97 | 0,005219 | 0,377078                     |  |      |
| TC0100000551.mm.1 | 3,97 Map2; A730034C02 | PSR0100004499.mm.1 | -3,07 | 0,011271 | 0,426793 Cassette Exon       |  | 0,35 |
| TC0100000551.mm.1 | 3,97 Map2; A730034C02 | PSR0100004447.mm.1 | -3,34 | 0,002182 | 0,344453 Cassette Exon       |  | 0,32 |
| TC0100000551.mm.1 | 3,97 Map2; A730034C02 | PSR0100004456.mm.1 | -3,47 | 0,023881 | 0,492304 Intron Retention    |  | 0,5  |
| TC0100000551.mm.1 | 3,97 Map2; A730034C02 | PSR0100004439.mm.1 | -3,62 | 0,005744 | 0,382993 Alternative 3' Acce |  | 0,13 |
| TC0100000551.mm.1 | 3,97 Map2; A730034C02 | JUC0100002628.mm.1 | -3,94 | 0,043257 | 0,549133                     |  |      |
| TC0100000551.mm.1 | 3,97 Map2; A730034C02 | JUC0100002613.mm.1 | -4,03 | 0,015236 | 0,452847                     |  |      |
| TC0100000551.mm.1 | 3,97 Map2; A730034C02 | PSR0100004448.mm.1 | -4,81 | 0,026947 | 0,502747 Cassette Exon       |  | 0,17 |
| TC0100000551.mm.1 | 3,97 Map2; A730034C02 | PSR0100004445.mm.1 | -5,19 | 0,003091 | 0,353892 Alternative 3' Acce |  | 0,22 |
| TC0100000551.mm.1 | 3,97 Map2; A730034C02 | PSR0100004451.mm.1 | -5,2  | 0,005958 | 0,385385 Alternative 3' Acce |  | 0,33 |
| TC0100000551.mm.1 | 3,97 Map2; A730034C02 | JUC0100002623.mm.1 | -6,97 | 0,015806 | 0,455923                     |  |      |
| TC0800001770.mm.1 | -1,03 Csm1            | JUC0800007788.mm.1 | 4,77  | 0,010257 | 0,420147                     |  |      |
| TC0800001770.mm.1 | -1,03 Csm1            | JUC0800007756.mm.1 | 3,34  | 0,028889 | 0,50858                      |  |      |
| TC0800001770.mm.1 | -1,03 Csm1            | JUC0800007742.mm.1 | 2,52  | 0,039391 | 0,539461                     |  |      |
| TC0800001770.mm.1 | -1,03 Csm1            | PSR0800014211.mm.1 | 2,23  | 0,001242 | 0,322251 Cassette Exon       |  | 0,18 |
| TC0800001770.mm.1 | -1,03 Csm1            | PSR0800014265.mm.1 | 2,19  | 0,024555 | 0,494116 Cassette Exon       |  | 0,14 |
| TC0800001770.mm.1 | -1,03 Csm1            | PSR0800014244.mm.1 | 2,11  | 0,021387 | 0,482022 Cassette Exon       |  | 0,12 |
| TC0800001770.mm.1 | -1,03 Csm1            | JUC0800007799.mm.1 | 2,1   | 0,003124 | 0,353892                     |  |      |
| TC1200000700.mm.1 | 1,2 Gphn              | JUC1200002831.mm.1 | 4,77  | 0,0059   | 0,383835                     |  |      |
| TC1200000700.mm.1 | 1,2 Gphn              | PSR1200004987.mm.1 | 2,58  | 0,026127 | 0,499897 Cassette Exon       |  | 0,17 |
| TC0200003560.mm.1 | -2,37 Nr4a2           | JUC0200015384.mm.1 | 4,77  | 0,040745 | 0,543028                     |  |      |
| TC0200003560.mm.1 | -2,37 Nr4a2           | PSR0200030356.mm.1 | 2,5   | 0,042818 | 0,548097                     |  |      |
| TC0200003560.mm.1 | -2,37 Nr4a2           | PSR0200030352.mm.1 | 2,14  | 0,024769 | 0,495014 Cassette Exon       |  | 0,08 |
| TC1100001687.mm.1 | 2,26 Rundc3a          | JUC1100008231.mm.1 | 4,76  | 0,002435 | 0,349135                     |  |      |
| TC1100001687.mm.1 | 2,26 Rundc3a          | JUC1100008232.mm.1 | 4,26  | 0,010396 | 0,421426                     |  |      |
| TC1100001687.mm.1 | 2,26 Rundc3a          | PSR1100015874.mm.1 | 3,29  | 0,00207  | 0,342141 Cassette Exon       |  | 0,38 |
| TC1100001687.mm.1 | 2,26 Rundc3a          | PSR1100015865.mm.1 | 2,09  | 0,000527 | 0,304044                     |  |      |
| TC1100001687.mm.1 | 2,26 Rundc3a          | PSR1100015889.mm.1 | -2,35 | 0,001796 | 0,336311 Cassette Exon       |  | 0,14 |
| TC1100001687.mm.1 | 2,26 Rundc3a          | PSR1100015873.mm.1 | -2,51 | 0,006786 | 0,393554 Intron Retention    |  | 0,38 |
| TC1100001687.mm.1 | 2,26 Rundc3a          | JUC1100008227.mm.1 | -2,59 | 0,005266 | 0,378003                     |  |      |
| TC1100001687.mm.1 | 2,26 Rundc3a          | PSR1100015886.mm.1 | -2,68 | 0,005785 | 0,383104 Alternative 3' Acce |  | 0,2  |
| TC1100001687.mm.1 | 2,26 Rundc3a          | PSR1100015879.mm.1 | -2,93 | 0,011473 | 0,428022 Intron Retention    |  | 0,4  |
| TC1100001687.mm.1 | 2,26 Rundc3a          | JUC1100008239.mm.1 | -3,06 | 0,028048 | 0,505874                     |  |      |
| TC1100001687.mm.1 | 2,26 Rundc3a          | PSR1100015887.mm.1 | -3,21 | 0,00098  | 0,314914 Alternative 3' Acce |  | 0,2  |
| TC1100001687.mm.1 | 2,26 Rundc3a          | PSR1100015866.mm.1 | -3,35 | 0,003389 | 0,3547 Alternative 3' Acce   |  | 0,43 |
| TC1100001687.mm.1 | 2,26 Rundc3a          | PSR1100015892.mm.1 | -3,4  | 0,011023 | 0,425635 Alternative 5' Donc |  | 0,3  |
| TC1100001687.mm.1 | 2,26 Rundc3a          | PSR1100015875.mm.1 | -3,53 | 0,007508 | 0,401082 Alternative 3' Acce |  | 0,51 |

|                   |                      |                    |        |          |                              |      |
|-------------------|----------------------|--------------------|--------|----------|------------------------------|------|
| TC1100001687.mm.1 | 2,26 Rundc3a         | PSR1100015871.mm.1 | -4,12  | 0,00105  | 0,316361 Alternative 3' Acce | 0,51 |
| TC1100001687.mm.1 | 2,26 Rundc3a         | JUC1100008236.mm.1 | -4,46  | 0,004228 | 0,363295                     |      |
| TC0400004097.mm.1 | 3,92 Kcnab2; Gm16334 | PSR0400034188.mm.1 | 4,76   | 0,000007 | 0,179072 Cassette Exon       | 0,36 |
| TC0400004097.mm.1 | 3,92 Kcnab2; Gm16334 | PSR0400034172.mm.1 | 4,4    | 0,000049 | 0,24627 Cassette Exon        | 0,33 |
| TC0400004097.mm.1 | 3,92 Kcnab2; Gm16334 | PSR0400034170.mm.1 | 4,23   | 0,00014  | 0,272178 Cassette Exon       | 0,25 |
| TC0400004097.mm.1 | 3,92 Kcnab2; Gm16334 | JUC0400017814.mm.1 | 3      | 0,001151 | 0,317344                     |      |
| TC0400004097.mm.1 | 3,92 Kcnab2; Gm16334 | PSR0400034182.mm.1 | -2,08  | 0,038102 | 0,535656 Cassette Exon       | 0,11 |
| TC0400004097.mm.1 | 3,92 Kcnab2; Gm16334 | JUC0400017808.mm.1 | -2,18  | 0,013617 | 0,44395                      |      |
| TC0400004097.mm.1 | 3,92 Kcnab2; Gm16334 | PSR0400034179.mm.1 | -2,34  | 0,010824 | 0,424109                     |      |
| TC0400004097.mm.1 | 3,92 Kcnab2; Gm16334 | JUC0400017836.mm.1 | -2,69  | 0,025778 | 0,498465                     |      |
| TC0400004097.mm.1 | 3,92 Kcnab2; Gm16334 | PSR0400034193.mm.1 | -3,21  | 0,011982 | 0,432286 Cassette Exon       | 0,23 |
| TC0400004097.mm.1 | 3,92 Kcnab2; Gm16334 | PSR0400034155.mm.1 | -3,26  | 0,012111 | 0,432704 Alternative 3' Acce | 0,36 |
| TC0400004097.mm.1 | 3,92 Kcnab2; Gm16334 | PSR0400034178.mm.1 | -3,32  | 0,015863 | 0,456449 Alternative 3' Acce | 0,16 |
| TC0400004097.mm.1 | 3,92 Kcnab2; Gm16334 | PSR0400034173.mm.1 | -4,63  | 0,006911 | 0,394898 Alternative 3' Acce | 0,41 |
| TC0400004097.mm.1 | 3,92 Kcnab2; Gm16334 | JUC0400017835.mm.1 | -4,67  | 0,01829  | 0,468049                     |      |
| TC0400004097.mm.1 | 3,92 Kcnab2; Gm16334 | PSR0400034160.mm.1 | -4,95  | 0,000901 | 0,313363 Cassette Exon       | 0,26 |
| TC0400004097.mm.1 | 3,92 Kcnab2; Gm16334 | PSR0400034180.mm.1 | -5,14  | 0,004624 | 0,369794 Alternative 5' Donc | 0,4  |
| TC0400004097.mm.1 | 3,92 Kcnab2; Gm16334 | PSR0400034201.mm.1 | -5,21  | 0,014008 | 0,446353 Cassette Exon       | 0,28 |
| TC0400004097.mm.1 | 3,92 Kcnab2; Gm16334 | PSR0400034198.mm.1 | -5,32  | 0,013412 | 0,442624 Cassette Exon       | 0,28 |
| TC0400004097.mm.1 | 3,92 Kcnab2; Gm16334 | PSR0400034191.mm.1 | -5,49  | 0,01305  | 0,439551 Cassette Exon       | 0,21 |
| TC0400004097.mm.1 | 3,92 Kcnab2; Gm16334 | JUC0400017828.mm.1 | -5,52  | 0,008211 | 0,405909                     |      |
| TC0400004097.mm.1 | 3,92 Kcnab2; Gm16334 | PSR0400034184.mm.1 | -5,61  | 0,006774 | 0,393372 Cassette Exon       | 0,16 |
| TC0400004097.mm.1 | 3,92 Kcnab2; Gm16334 | JUC0400017833.mm.1 | -5,7   | 0,004751 | 0,371039                     |      |
| TC0400004097.mm.1 | 3,92 Kcnab2; Gm16334 | PSR0400034194.mm.1 | -6,2   | 0,010858 | 0,424161 Cassette Exon       | 0,35 |
| TC0400004097.mm.1 | 3,92 Kcnab2; Gm16334 | JUC0400017829.mm.1 | -6,51  | 0,027113 | 0,503022                     |      |
| TC0400004097.mm.1 | 3,92 Kcnab2; Gm16334 | PSR0400034195.mm.1 | -7,19  | 0,010557 | 0,422341 Cassette Exon       | 0,28 |
| TC0400004097.mm.1 | 3,92 Kcnab2; Gm16334 | PSR0400034196.mm.1 | -7,35  | 0,005711 | 0,382644 Cassette Exon       | 0,28 |
| TC0400004097.mm.1 | 3,92 Kcnab2; Gm16334 | PSR0400034190.mm.1 | -9,11  | 0,007375 | 0,39943 Cassette Exon        | 0,21 |
| TC0400004097.mm.1 | 3,92 Kcnab2; Gm16334 | JUC0400017820.mm.1 | -9,18  | 0,002882 | 0,352207                     |      |
| TC0400004097.mm.1 | 3,92 Kcnab2; Gm16334 | PSR0400034186.mm.1 | -9,54  | 0,004119 | 0,3623 Cassette Exon         | 0,21 |
| TC0400004097.mm.1 | 3,92 Kcnab2; Gm16334 | JUC0400017834.mm.1 | -9,68  | 0,001829 | 0,337273                     |      |
| TC0400004097.mm.1 | 3,92 Kcnab2; Gm16334 | JUC0400017830.mm.1 | -11,45 | 0,007473 | 0,400381                     |      |
| TC0300003150.mm.1 | 1,26 St6galnac5      | PSR0300024725.mm.1 | 4,76   | 0,006325 | 0,389424 Cassette Exon       | 0,28 |
| TC0200002987.mm.1 | -1,11 Trdmt1         | JUC0200012527.mm.1 | 4,76   | 0,048404 | 0,560669                     |      |
| TC0200004636.mm.1 | -2,47 Slc4a11        | PSR0200039683.mm.1 | 4,75   | 0,005393 | 0,378916 Intron Retention    | 0,73 |
| TC0200004636.mm.1 | -2,47 Slc4a11        | PSR0200039662.mm.1 | 3,54   | 0,029241 | 0,509699 Cassette Exon       | 0,31 |
| TC0200004636.mm.1 | -2,47 Slc4a11        | PSR0200039666.mm.1 | 3,17   | 0,007828 | 0,403089 Intron Retention    | 0,46 |
| TC0200004636.mm.1 | -2,47 Slc4a11        | JUC0200020545.mm.1 | 2,99   | 0,003352 | 0,354243                     |      |
| TC0200004636.mm.1 | -2,47 Slc4a11        | PSR0200039663.mm.1 | 2,93   | 0,039703 | 0,540417 Cassette Exon       | 0,26 |
| TC0200004636.mm.1 | -2,47 Slc4a11        | JUC0200020542.mm.1 | 2,59   | 0,046228 | 0,556056                     |      |
| TC0200004636.mm.1 | -2,47 Slc4a11        | PSR0200039670.mm.1 | 2,41   | 0,003399 | 0,354874 Alternative 3' Acce | 0,21 |
| TC0200004636.mm.1 | -2,47 Slc4a11        | PSR0200039688.mm.1 | 2,32   | 0,042881 | 0,548178 Intron Retention    | 0,32 |
| TC0200004636.mm.1 | -2,47 Slc4a11        | PSR0200039679.mm.1 | 2,28   | 0,031707 | 0,517443 Alternative 5' Donc | 0,2  |
| TC0200004636.mm.1 | -2,47 Slc4a11        | PSR0200039677.mm.1 | 2,25   | 0,018091 | 0,46716 Intron Retention     | 0,3  |
| TC0X00001931.mm.1 | 4,57 Syn1            | JUC0X00006192.mm.1 | 4,75   | 0,003812 | 0,35811                      |      |
| TC0X00001931.mm.1 | 4,57 Syn1            | JUC0X00006191.mm.1 | 3,02   | 0,027247 | 0,503642                     |      |
| TC0X00001931.mm.1 | 4,57 Syn1            | JUC0X00006196.mm.1 | 2,98   | 0,003028 | 0,353502                     |      |
| TC0X00001931.mm.1 | 4,57 Syn1            | PSR0X00012249.mm.1 | 2,9    | 0,018901 | 0,47127 Cassette Exon        | 0,4  |

|                   |               |                    |       |          |          |                     |      |
|-------------------|---------------|--------------------|-------|----------|----------|---------------------|------|
| TCOX00001931.mm.1 | 4,57 Syn1     | PSROX00012253.mm.1 | 2,86  | 0,003766 | 0,357586 | Cassette Exon       | 0,16 |
| TCOX00001931.mm.1 | 4,57 Syn1     | PSROX00012245.mm.1 | -2,36 | 0,011219 | 0,426683 | Cassette Exon       | 0,28 |
| TCOX00001931.mm.1 | 4,57 Syn1     | PSROX00012256.mm.1 | -2,63 | 0,004618 | 0,369794 | Cassette Exon       | 0,15 |
| TCOX00001931.mm.1 | 4,57 Syn1     | JUCOX00006186.mm.1 | -2,74 | 0,017488 | 0,463964 |                     |      |
| TCOX00001931.mm.1 | 4,57 Syn1     | PSROX00012243.mm.1 | -3,24 | 0,003205 | 0,354243 | Cassette Exon       | 0,42 |
| TCOX00001931.mm.1 | 4,57 Syn1     | JUCOX00006195.mm.1 | -3,28 | 0,004144 | 0,3623   |                     |      |
| TCOX00001931.mm.1 | 4,57 Syn1     | JUCOX00006190.mm.1 | -3,45 | 0,001914 | 0,339584 |                     |      |
| TCOX00001931.mm.1 | 4,57 Syn1     | PSROX00012246.mm.1 | -3,77 | 0,004727 | 0,370888 | Cassette Exon       | 0,39 |
| TCOX00001931.mm.1 | 4,57 Syn1     | JUCOX00006189.mm.1 | -4,67 | 0,003009 | 0,353447 |                     |      |
| TCOX00001931.mm.1 | 4,57 Syn1     | PSROX00012244.mm.1 | -5,51 | 0,003936 | 0,359818 | Intron Retention    | 0,3  |
| TCOX00001931.mm.1 | 4,57 Syn1     | JUCOX00006187.mm.1 | -6,82 | 0,000431 | 0,297771 |                     |      |
| TC1300001997.mm.1 | 2,27 Shc3     | JUC1300006420.mm.1 | 4,75  | 0,000469 | 0,298999 |                     |      |
| TC1300001997.mm.1 | 2,27 Shc3     | PSR1300012439.mm.1 | 4,57  | 0,000069 | 0,250992 | Cassette Exon       | 0,32 |
| TC1300001997.mm.1 | 2,27 Shc3     | PSR1300012440.mm.1 | 3,61  | 0,00816  | 0,40551  | Cassette Exon       | 0,37 |
| TC1300001997.mm.1 | 2,27 Shc3     | PSR1300012443.mm.1 | 3,32  | 0,003589 | 0,356223 | Cassette Exon       | 0,23 |
| TC1300001997.mm.1 | 2,27 Shc3     | JUC1300006414.mm.1 | -2,22 | 0,042775 | 0,548097 |                     |      |
| TC1300001997.mm.1 | 2,27 Shc3     | PSR1300012434.mm.1 | -2,41 | 0,008187 | 0,40568  | Cassette Exon       | 0,19 |
| TC1600000711.mm.1 | -1,38 Gm19723 | JUC1600003285.mm.1 | 4,75  | 0,004148 | 0,3623   |                     |      |
| TCOX00002797.mm.1 | 1,21 Abcb7    | JUCOX00008913.mm.1 | 4,75  | 0,006033 | 0,386586 |                     |      |
| TC1200001625.mm.1 | 2,86 Hdac9    | JUC1200006294.mm.1 | 4,74  | 0,001998 | 0,341091 |                     |      |
| TC1200001625.mm.1 | 2,86 Hdac9    | PSR1200011355.mm.1 | 2,5   | 0,007719 | 0,402552 | Cassette Exon       | 0,17 |
| TC1200001625.mm.1 | 2,86 Hdac9    | JUC1200006277.mm.1 | -2,06 | 0,022057 | 0,485327 |                     |      |
| TC1200001625.mm.1 | 2,86 Hdac9    | PSR1200011352.mm.1 | -2,22 | 0,014923 | 0,451919 | Cassette Exon       | 0,21 |
| TC1200001625.mm.1 | 2,86 Hdac9    | PSR1200011330.mm.1 | -2,27 | 0,036594 | 0,531454 | Cassette Exon       | 0,2  |
| TC1200001625.mm.1 | 2,86 Hdac9    | PSR1200011329.mm.1 | -2,35 | 0,04475  | 0,552338 | Cassette Exon       | 0,13 |
| TC1200001625.mm.1 | 2,86 Hdac9    | PSR1200011361.mm.1 | -2,35 | 0,01973  | 0,474922 | Cassette Exon       | 0,13 |
| TC1200001625.mm.1 | 2,86 Hdac9    | PSR1200011337.mm.1 | -2,42 | 0,013995 | 0,446353 | Cassette Exon       | 0,27 |
| TC1200001625.mm.1 | 2,86 Hdac9    | JUC1200006269.mm.1 | -2,42 | 0,033505 | 0,523018 |                     |      |
| TC1200001625.mm.1 | 2,86 Hdac9    | PSR1200011325.mm.1 | -2,79 | 0,018083 | 0,46716  | Cassette Exon       | 0,3  |
| TC1200001625.mm.1 | 2,86 Hdac9    | JUC1200006266.mm.1 | -2,8  | 0,001974 | 0,340775 |                     |      |
| TC1200001625.mm.1 | 2,86 Hdac9    | PSR1200011354.mm.1 | -3,12 | 0,017296 | 0,463191 | Alternative 3' Acce | 0,33 |
| TC1200001625.mm.1 | 2,86 Hdac9    | PSR1200011338.mm.1 | -3,14 | 0,0069   | 0,394768 | Cassette Exon       | 0,33 |
| TC1200001625.mm.1 | 2,86 Hdac9    | PSR1200011359.mm.1 | -3,26 | 0,010612 | 0,422786 | Cassette Exon       | 0,28 |
| TC1200001625.mm.1 | 2,86 Hdac9    | PSR1200011339.mm.1 | -3,38 | 0,004927 | 0,373093 | Cassette Exon       | 0,36 |
| TC1200001625.mm.1 | 2,86 Hdac9    | PSR1200011340.mm.1 | -3,38 | 0,004076 | 0,362082 | Cassette Exon       | 0,36 |
| TC1200001625.mm.1 | 2,86 Hdac9    | PSR1200011333.mm.1 | -3,55 | 0,007228 | 0,39826  | Cassette Exon       | 0,38 |
| TC1200001625.mm.1 | 2,86 Hdac9    | PSR1200011332.mm.1 | -3,67 | 0,013746 | 0,444758 | Cassette Exon       | 0,33 |
| TC1200001625.mm.1 | 2,86 Hdac9    | PSR1200011328.mm.1 | -3,75 | 0,008554 | 0,408183 | Cassette Exon       | 0,39 |
| TC1200001625.mm.1 | 2,86 Hdac9    | JUC1200006282.mm.1 | -4,27 | 0,002494 | 0,349135 |                     |      |
| TC1200001625.mm.1 | 2,86 Hdac9    | PSR1200011360.mm.1 | -4,37 | 0,016522 | 0,459611 | Cassette Exon       | 0,32 |
| TC1200001625.mm.1 | 2,86 Hdac9    | PSR1200011331.mm.1 | -4,73 | 0,019245 | 0,473063 | Cassette Exon       | 0,36 |
| TC1200001625.mm.1 | 2,86 Hdac9    | JUC1200006273.mm.1 | -4,99 | 0,047538 | 0,558701 |                     |      |
| TC1200001625.mm.1 | 2,86 Hdac9    | JUC1200006271.mm.1 | -5,21 | 0,025304 | 0,497227 |                     |      |
| TC1200001625.mm.1 | 2,86 Hdac9    | PSR1200011323.mm.1 | -5,27 | 0,008613 | 0,408434 | Alternative 3' Acce | 0,4  |
| TC1200001625.mm.1 | 2,86 Hdac9    | PSR1200011362.mm.1 | -6,55 | 0,010951 | 0,425009 | Cassette Exon       | 0,41 |
| TC1200001625.mm.1 | 2,86 Hdac9    | PSR1200011336.mm.1 | -6,84 | 0,01029  | 0,420394 | Cassette Exon       | 0,35 |
| TC1200001625.mm.1 | 2,86 Hdac9    | JUC1200006264.mm.1 | -6,96 | 0,001777 | 0,336311 |                     |      |
| TC1200001625.mm.1 | 2,86 Hdac9    | JUC1200006291.mm.1 | -7,08 | 0,007939 | 0,403819 |                     |      |

|                   |                      |                    |       |          |          |                     |      |
|-------------------|----------------------|--------------------|-------|----------|----------|---------------------|------|
| TC1200001625.mm.1 | 2,86 Hdac9           | JUC1200006275.mm.1 | -7,27 | 0,003521 | 0,355749 |                     |      |
| TC1200001625.mm.1 | 2,86 Hdac9           | PSR1200011334.mm.1 | -7,34 | 0,001945 | 0,340349 | Cassette Exon       | 0,38 |
| TC1200001625.mm.1 | 2,86 Hdac9           | JUC1200006288.mm.1 | -7,84 | 0,009431 | 0,416082 |                     |      |
| TC1200001625.mm.1 | 2,86 Hdac9           | JUC1200006262.mm.1 | -8,52 | 0,003498 | 0,355638 |                     |      |
| TC0700003342.mm.1 | 6,51                 | PSR0700028636.mm.1 | 4,74  | 0,001603 | 0,332773 | Cassette Exon       | 0,17 |
| TC0700003342.mm.1 | 6,51                 | JUC0700015155.mm.1 | -3,42 | 0,034066 | 0,524583 |                     |      |
| TC0700003342.mm.1 | 6,51                 | PSR0700028637.mm.1 | -4,74 | 0,001603 | 0,332773 | Cassette Exon       | 0,39 |
| TC1400001455.mm.1 | 1,05 Fezf2           | JUC1400005870.mm.1 | 4,74  | 0,015021 | 0,452111 |                     |      |
| TC1400001455.mm.1 | 1,05 Fezf2           | JUC1400005872.mm.1 | 4,05  | 0,02581  | 0,498589 |                     |      |
| TC1400001455.mm.1 | 1,05 Fezf2           | PSR1400010933.mm.1 | 2,43  | 0,036503 | 0,531304 | Cassette Exon       | 0,27 |
| TC0200001033.mm.1 | -1,28 Dync1i2        | JUC0200004265.mm.1 | 4,73  | 0,023975 | 0,492725 |                     |      |
| TC0200001033.mm.1 | -1,28 Dync1i2        | PSR0200008319.mm.1 | 4,24  | 0,01038  | 0,421341 | Cassette Exon       | 0,46 |
| TC0200001033.mm.1 | -1,28 Dync1i2        | PSR0200008306.mm.1 | 2,04  | 0,006527 | 0,391502 | Cassette Exon       | 0,1  |
| TC1700001439.mm.1 | 1,84 Pacrg           | JUC1700006970.mm.1 | 4,73  | 0,011435 | 0,427663 |                     |      |
| TC1700001439.mm.1 | 1,84 Pacrg           | PSR1700012817.mm.1 | 2,09  | 0,016709 | 0,460199 | Mutually Exclusive  | 0,27 |
| TC1700001439.mm.1 | 1,84 Pacrg           | PSR1700012814.mm.1 | -2,06 | 0,004805 | 0,371408 | Cassette Exon       | 0,1  |
| TC1700001439.mm.1 | 1,84 Pacrg           | PSR1700012813.mm.1 | -2,23 | 0,008173 | 0,405603 | Cassette Exon       | 0,1  |
| TC1700001439.mm.1 | 1,84 Pacrg           | PSR1700012818.mm.1 | -2,56 | 0,002382 | 0,348564 | Mutually Exclusive  | 0,27 |
| TC0100002071.mm.1 | -1,32 Fam135a        | JUC0100009574.mm.1 | 4,73  | 0,001099 | 0,317328 |                     |      |
| TC0100002071.mm.1 | -1,32 Fam135a        | PSR0100016852.mm.1 | 2,55  | 0,049199 | 0,562457 | Alternative 5' Donc | 0,15 |
| TC0700001983.mm.1 | 1,02 Ppp2r2d         | JUC0700009198.mm.1 | 4,73  | 0,000356 | 0,290838 |                     |      |
| TC1300002747.mm.1 | 2,31 Nim1k           | JUC1300009982.mm.1 | 4,72  | 0,006295 | 0,389009 |                     |      |
| TC1300002747.mm.1 | 2,31 Nim1k           | JUC1300009981.mm.1 | 2,14  | 0,01222  | 0,433326 |                     |      |
| TC1300002747.mm.1 | 2,31 Nim1k           | PSR1300018587.mm.1 | -2,17 | 0,0342   | 0,525083 | Cassette Exon       | 0,01 |
| TC1300002747.mm.1 | 2,31 Nim1k           | PSR1300018586.mm.1 | -2,3  | 0,008098 | 0,405071 | Alternative 5' Donc | 0,17 |
| TC1300002747.mm.1 | 2,31 Nim1k           | JUC1300009983.mm.1 | -2,35 | 0,010666 | 0,423012 |                     |      |
| TC0X00001526.mm.1 | -1,12 Huwe1; Mir3113 | JUC0X00004804.mm.1 | 4,72  | 0,001885 | 0,338712 |                     |      |
| TC0X00001526.mm.1 | -1,12 Huwe1; Mir3113 | JUC0X00004850.mm.1 | 2,56  | 0,009158 | 0,413447 |                     |      |
| TC0X00001526.mm.1 | -1,12 Huwe1; Mir3113 | JUC0X00004794.mm.1 | 2,39  | 0,006347 | 0,389463 |                     |      |
| TC0X00000808.mm.1 | 2,64 Dmd             | JUC0X00002717.mm.1 | 4,71  | 0,002773 | 0,350871 |                     |      |
| TC0X00000808.mm.1 | 2,64 Dmd             | PSR0X00005402.mm.1 | 3,95  | 0,011979 | 0,432253 | Cassette Exon       | 0,41 |
| TC0X00000808.mm.1 | 2,64 Dmd             | PSR0X00005405.mm.1 | 3,75  | 0,00205  | 0,341391 | Cassette Exon       | 0,42 |
| TC0X00000808.mm.1 | 2,64 Dmd             | JUC0X00002705.mm.1 | 3,37  | 0,048315 | 0,56048  |                     |      |
| TC0X00000808.mm.1 | 2,64 Dmd             | JUC0X00002712.mm.1 | 3,07  | 0,000205 | 0,28803  |                     |      |
| TC0X00000808.mm.1 | 2,64 Dmd             | PSR0X00005424.mm.1 | 2,58  | 0,006786 | 0,393554 | Cassette Exon       | 0,09 |
| TC0X00000808.mm.1 | 2,64 Dmd             | PSR0X00005423.mm.1 | 2,53  | 0,000167 | 0,272566 | Cassette Exon       | 0,06 |
| TC0X00000808.mm.1 | 2,64 Dmd             | JUC0X00002754.mm.1 | 2,51  | 0,017762 | 0,465425 |                     |      |
| TC0X00000808.mm.1 | 2,64 Dmd             | PSR0X00005406.mm.1 | 2,41  | 0,010127 | 0,419203 | Cassette Exon       | 0,23 |
| TC0X00000808.mm.1 | 2,64 Dmd             | JUC0X00002715.mm.1 | 2,35  | 0,015924 | 0,456718 |                     |      |
| TC0X00000808.mm.1 | 2,64 Dmd             | PSR0X00005408.mm.1 | 2,31  | 0,004466 | 0,367639 | Cassette Exon       | 0,21 |
| TC0X00000808.mm.1 | 2,64 Dmd             | JUC0X00002706.mm.1 | 2,28  | 0,005591 | 0,381035 |                     |      |
| TC0X00000808.mm.1 | 2,64 Dmd             | JUC0X00002708.mm.1 | 2,22  | 0,012935 | 0,438537 |                     |      |
| TC0X00000808.mm.1 | 2,64 Dmd             | PSR0X00005420.mm.1 | 2,18  | 0,001474 | 0,329052 | Cassette Exon       | 0,24 |
| TC0X00000808.mm.1 | 2,64 Dmd             | PSR0X00005409.mm.1 | 2,17  | 0,042634 | 0,548097 | Cassette Exon       | 0,23 |
| TC0X00000808.mm.1 | 2,64 Dmd             | PSR0X00005433.mm.1 | 2,08  | 0,002553 | 0,349501 | Alternative 3' Acce | 0,19 |
| TC0X00000808.mm.1 | 2,64 Dmd             | PSR0X00005407.mm.1 | 2,01  | 0,007454 | 0,400326 | Cassette Exon       | 0,21 |
| TC0X00000808.mm.1 | 2,64 Dmd             | JUC0X00002707.mm.1 | 2,01  | 0,022241 | 0,485896 |                     |      |
| TC0X00000808.mm.1 | 2,64 Dmd             | JUC0X00002703.mm.1 | -2,01 | 0,043804 | 0,550456 |                     |      |

|                   |             |                    |       |          |                              |      |
|-------------------|-------------|--------------------|-------|----------|------------------------------|------|
| TCOX00000808.mm.1 | 2,64 Dmd    | PSROX00005456.mm.1 | -2,03 | 0,016275 | 0,45836 Cassette Exon        | 0,14 |
| TCOX00000808.mm.1 | 2,64 Dmd    | PSROX00005367.mm.1 | -2,04 | 0,003803 | 0,358103 Cassette Exon       | 0,09 |
| TCOX00000808.mm.1 | 2,64 Dmd    | PSROX00005454.mm.1 | -2,13 | 0,011371 | 0,427487 Cassette Exon       | 0,2  |
| TCOX00000808.mm.1 | 2,64 Dmd    | PSROX00005460.mm.1 | -2,26 | 0,049177 | 0,562376 Cassette Exon       | 0,17 |
| TCOX00000808.mm.1 | 2,64 Dmd    | JUCOX00002734.mm.1 | -2,32 | 0,010747 | 0,423772                     |      |
| TCOX00000808.mm.1 | 2,64 Dmd    | PSROX00005463.mm.1 | -2,37 | 0,033745 | 0,523558 Cassette Exon       | 0,11 |
| TCOX00000808.mm.1 | 2,64 Dmd    | PSROX00005422.mm.1 | -2,38 | 0,037309 | 0,533573 Cassette Exon       | 0,22 |
| TCOX00000808.mm.1 | 2,64 Dmd    | JUCOX00002745.mm.1 | -2,4  | 0,015973 | 0,456885                     |      |
| TCOX00000808.mm.1 | 2,64 Dmd    | PSROX00005478.mm.1 | -2,51 | 0,006527 | 0,391502 Alternative 5' Donc | 0,1  |
| TCOX00000808.mm.1 | 2,64 Dmd    | PSROX00005455.mm.1 | -2,53 | 0,01629  | 0,458454 Cassette Exon       | 0,23 |
| TCOX00000808.mm.1 | 2,64 Dmd    | PSROX00005471.mm.1 | -2,54 | 0,011826 | 0,430458 Cassette Exon       | 0,11 |
| TCOX00000808.mm.1 | 2,64 Dmd    | PSROX00005370.mm.1 | -2,66 | 0,002912 | 0,352289                     |      |
| TCOX00000808.mm.1 | 2,64 Dmd    | PSROX00005450.mm.1 | -2,72 | 0,012927 | 0,438472 Cassette Exon       | 0,31 |
| TCOX00000808.mm.1 | 2,64 Dmd    | PSROX00005452.mm.1 | -2,73 | 0,035061 | 0,527574 Alternative 5' Donc | 0,19 |
| TCOX00000808.mm.1 | 2,64 Dmd    | JUCOX00002759.mm.1 | -2,74 | 0,008793 | 0,409822                     |      |
| TCOX00000808.mm.1 | 2,64 Dmd    | JUCOX00002746.mm.1 | -2,78 | 0,049557 | 0,563325                     |      |
| TCOX00000808.mm.1 | 2,64 Dmd    | JUCOX00002739.mm.1 | -2,83 | 0,034328 | 0,525546                     |      |
| TCOX00000808.mm.1 | 2,64 Dmd    | PSROX00005372.mm.1 | -2,89 | 0,047012 | 0,557749 Cassette Exon       | 0,32 |
| TCOX00000808.mm.1 | 2,64 Dmd    | PSROX00005473.mm.1 | -3,14 | 0,022642 | 0,487549 Cassette Exon       | 0,11 |
| TCOX00000808.mm.1 | 2,64 Dmd    | JUCOX00002732.mm.1 | -3,21 | 0,042654 | 0,548097                     |      |
| TCOX00000808.mm.1 | 2,64 Dmd    | PSROX00005371.mm.1 | -3,22 | 0,00447  | 0,367767                     |      |
| TCOX00000808.mm.1 | 2,64 Dmd    | PSROX00005458.mm.1 | -3,4  | 0,001046 | 0,316361 Alternative 5' Donc | 0,22 |
| TCOX00000808.mm.1 | 2,64 Dmd    | PSROX00005459.mm.1 | -3,7  | 0,016649 | 0,459985 Cassette Exon       | 0,27 |
| TCOX00000808.mm.1 | 2,64 Dmd    | PSROX00005448.mm.1 | -3,73 | 0,014936 | 0,451968 Cassette Exon       | 0,31 |
| TCOX00000808.mm.1 | 2,64 Dmd    | JUCOX00002675.mm.1 | -4,62 | 0,005582 | 0,381035                     |      |
| TCOX00000808.mm.1 | 2,64 Dmd    | JUCOX00002758.mm.1 | -4,76 | 0,015443 | 0,454271                     |      |
| TCOX00000808.mm.1 | 2,64 Dmd    | PSROX00005369.mm.1 | -4,83 | 0,013434 | 0,442693 Cassette Exon       | 0,41 |
| TCOX00000808.mm.1 | 2,64 Dmd    | JUCOX00002747.mm.1 | -5,07 | 0,017728 | 0,465216                     |      |
| TCOX00000808.mm.1 | 2,64 Dmd    | PSROX00005436.mm.1 | -5,28 | 0,001902 | 0,338712 Cassette Exon       | 0,3  |
| TC1400001125.mm.1 | 1,15 Tdrd3  | PSR1400008984.mm.1 | 4,71  | 0,044866 | 0,552613 Cassette Exon       | 0,24 |
| TC0800000274.mm.1 | -1,08 Tpte  | JUC0800001086.mm.1 | 4,71  | 0,030784 | 0,514144                     |      |
| TC0800000274.mm.1 | -1,08 Tpte  | JUC0800001112.mm.1 | -3,17 | 0,023564 | 0,490947                     |      |
| TC0200003603.mm.1 | 4,57 Pla2r1 | JUC0200015608.mm.1 | 4,7   | 0,001967 | 0,340561                     |      |
| TC0200003603.mm.1 | 4,57 Pla2r1 | JUC0200015600.mm.1 | 3,6   | 0,031576 | 0,517177                     |      |
| TC0200003603.mm.1 | 4,57 Pla2r1 | JUC0200015609.mm.1 | 2,46  | 0,012313 | 0,434392                     |      |
| TC0200003603.mm.1 | 4,57 Pla2r1 | JUC0200015606.mm.1 | 2,35  | 0,000269 | 0,28803                      |      |
| TC0200003603.mm.1 | 4,57 Pla2r1 | PSR0200030756.mm.1 | 2,27  | 0,038769 | 0,537422 Cassette Exon       | 0,32 |
| TC0200003603.mm.1 | 4,57 Pla2r1 | PSR0200030737.mm.1 | -2,06 | 0,001027 | 0,316361 Cassette Exon       | 0,22 |
| TC0200003603.mm.1 | 4,57 Pla2r1 | PSR0200030741.mm.1 | -2,17 | 0,021362 | 0,481914 Intron Retention    | 0,23 |
| TC0200003603.mm.1 | 4,57 Pla2r1 | PSR0200030744.mm.1 | -2,57 | 0,000038 | 0,244636 Alternative 5' Donc | 0,17 |
| TC0200003603.mm.1 | 4,57 Pla2r1 | JUC0200015607.mm.1 | -2,7  | 0,021435 | 0,482126                     |      |
| TC0200003603.mm.1 | 4,57 Pla2r1 | PSR0200030743.mm.1 | -2,77 | 0,001354 | 0,325427 Intron Retention    | 0,22 |
| TC0200003603.mm.1 | 4,57 Pla2r1 | PSR0200030739.mm.1 | -3,01 | 0,000992 | 0,316265 Alternative 3' Acce | 0,28 |
| TC0200003603.mm.1 | 4,57 Pla2r1 | PSR0200030721.mm.1 | -3,08 | 0,001084 | 0,317191 Cassette Exon       | 0,36 |
| TC0200003603.mm.1 | 4,57 Pla2r1 | JUC0200015596.mm.1 | -3,16 | 0,005218 | 0,377078                     |      |
| TC0200003603.mm.1 | 4,57 Pla2r1 | PSR0200030738.mm.1 | -3,36 | 0,016677 | 0,460085 Cassette Exon       | 0,22 |
| TC0200003603.mm.1 | 4,57 Pla2r1 | PSR0200030733.mm.1 | -3,71 | 0,009162 | 0,413447 Intron Retention    | 0,53 |
| TC0200003603.mm.1 | 4,57 Pla2r1 | JUC0200015587.mm.1 | -3,89 | 0,014951 | 0,451968                     |      |

|                   |              |                    |       |          |                              |      |
|-------------------|--------------|--------------------|-------|----------|------------------------------|------|
| TC0200003603.mm.1 | 4,57 Pla2r1  | PSR0200030720.mm.1 | -4,26 | 0,001928 | 0,340171 Intron Retention    | 0,41 |
| TC0200003603.mm.1 | 4,57 Pla2r1  | PSR0200030762.mm.1 | -4,28 | 0,001154 | 0,317344 Alternative 3' Acce | 0,36 |
| TC0200003603.mm.1 | 4,57 Pla2r1  | PSR0200030735.mm.1 | -7    | 0,006904 | 0,394866 Cassette Exon       | 0,22 |
| TC1300002453.mm.1 | 3,07 Pde8b   | PSR1300016381.mm.1 | 4,7   | 0,017702 | 0,465159 Cassette Exon       | 0,31 |
| TC1300002453.mm.1 | 3,07 Pde8b   | JUC1300008647.mm.1 | 4,11  | 0,002171 | 0,344453                     |      |
| TC1300002453.mm.1 | 3,07 Pde8b   | JUC1300008648.mm.1 | 2,16  | 0,001757 | 0,335996                     |      |
| TC1300002453.mm.1 | 3,07 Pde8b   | PSR1300016380.mm.1 | 2,1   | 0,048017 | 0,559595 Cassette Exon       | 0,27 |
| TC1300002453.mm.1 | 3,07 Pde8b   | PSR1300016379.mm.1 | 2,04  | 0,000007 | 0,179072 Cassette Exon       | 0,28 |
| TC1300002453.mm.1 | 3,07 Pde8b   | JUC1300008651.mm.1 | -2,04 | 0,046268 | 0,556184                     |      |
| TC1300002453.mm.1 | 3,07 Pde8b   | PSR1300016348.mm.1 | -2,2  | 0,016881 | 0,460797 Cassette Exon       | 0,18 |
| TC1300002453.mm.1 | 3,07 Pde8b   | PSR1300016362.mm.1 | -2,24 | 0,028929 | 0,50862 Cassette Exon        | 0,19 |
| TC1300002453.mm.1 | 3,07 Pde8b   | PSR1300016382.mm.1 | -2,35 | 0,006346 | 0,389463 Cassette Exon       | 0,1  |
| TC1300002453.mm.1 | 3,07 Pde8b   | PSR1300016361.mm.1 | -2,36 | 0,024003 | 0,492783 Cassette Exon       | 0,19 |
| TC1300002453.mm.1 | 3,07 Pde8b   | JUC1300008658.mm.1 | -2,37 | 0,005126 | 0,376377                     |      |
| TC1300002453.mm.1 | 3,07 Pde8b   | PSR1300016394.mm.1 | -2,41 | 0,010702 | 0,423331 Alternative 3' Acce | 0,21 |
| TC1300002453.mm.1 | 3,07 Pde8b   | JUC1300008638.mm.1 | -2,47 | 0,000766 | 0,308403                     |      |
| TC1300002453.mm.1 | 3,07 Pde8b   | PSR1300016387.mm.1 | -2,96 | 0,003806 | 0,358103 Cassette Exon       | 0,16 |
| TC1300002453.mm.1 | 3,07 Pde8b   | PSR1300016360.mm.1 | -3    | 0,020176 | 0,477086 Cassette Exon       | 0,19 |
| TC1300002453.mm.1 | 3,07 Pde8b   | PSR1300016392.mm.1 | -3,02 | 0,001791 | 0,336311 Cassette Exon       | 0,16 |
| TC1300002453.mm.1 | 3,07 Pde8b   | PSR1300016390.mm.1 | -3,19 | 0,030893 | 0,514574 Cassette Exon       | 0,2  |
| TC1300002453.mm.1 | 3,07 Pde8b   | PSR1300016389.mm.1 | -3,35 | 0,015882 | 0,456526 Cassette Exon       | 0,2  |
| TC1300002453.mm.1 | 3,07 Pde8b   | JUC1300008665.mm.1 | -3,38 | 0,042595 | 0,548047                     |      |
| TC1300002453.mm.1 | 3,07 Pde8b   | PSR1300016393.mm.1 | -3,51 | 0,002905 | 0,352262 Alternative 3' Acce | 0,21 |
| TC1300002453.mm.1 | 3,07 Pde8b   | PSR1300016388.mm.1 | -3,62 | 0,00676  | 0,393343 Cassette Exon       | 0,2  |
| TC1300002453.mm.1 | 3,07 Pde8b   | JUC1300008655.mm.1 | -3,73 | 0,035195 | 0,528237                     |      |
| TC1300002453.mm.1 | 3,07 Pde8b   | PSR1300016356.mm.1 | -3,99 | 0,014555 | 0,449658 Alternative 3' Acce | 0,45 |
| TC1300002453.mm.1 | 3,07 Pde8b   | JUC1300008667.mm.1 | -3,99 | 0,021731 | 0,484184                     |      |
| TC1300002453.mm.1 | 3,07 Pde8b   | PSR1300016368.mm.1 | -4,6  | 0,00869  | 0,408815 Cassette Exon       | 0,33 |
| TC1300002453.mm.1 | 3,07 Pde8b   | JUC1300008663.mm.1 | -4,67 | 0,009915 | 0,418378                     |      |
| TC1300002453.mm.1 | 3,07 Pde8b   | JUC1300008636.mm.1 | -4,84 | 0,00036  | 0,290838                     |      |
| TC1300002453.mm.1 | 3,07 Pde8b   | JUC1300008666.mm.1 | -5,52 | 0,019528 | 0,474538                     |      |
| TC1300002453.mm.1 | 3,07 Pde8b   | JUC1300008660.mm.1 | -5,86 | 0,009101 | 0,412874                     |      |
| TC1300002453.mm.1 | 3,07 Pde8b   | JUC1300008634.mm.1 | -9,66 | 0,009893 | 0,418237                     |      |
| TC0400004194.mm.1 | -1,38 Ubr4   | JUC0400007582.mm.1 | 4,7   | 0,005932 | 0,384945                     |      |
| TC0400004194.mm.1 | -1,38 Ubr4   | JUC0400007479.mm.1 | 2,69  | 0,027903 | 0,505612                     |      |
| TC0400004194.mm.1 | -1,38 Ubr4   | PSR0400014429.mm.1 | 2,61  | 0,002975 | 0,352501 Alternative 3' Acce | 0,23 |
| TC0400004194.mm.1 | -1,38 Ubr4   | JUC0400007572.mm.1 | 2,58  | 0,010349 | 0,421002                     |      |
| TC0400004194.mm.1 | -1,38 Ubr4   | JUC0400007515.mm.1 | 2,44  | 0,018287 | 0,468049                     |      |
| TC0400004194.mm.1 | -1,38 Ubr4   | JUC0400007574.mm.1 | 2,37  | 0,04904  | 0,561971                     |      |
| TC0400004194.mm.1 | -1,38 Ubr4   | PSR0400014412.mm.1 | 2,26  | 0,041978 | 0,546028 Cassette Exon       | 0,15 |
| TC0400004194.mm.1 | -1,38 Ubr4   | PSR0400014404.mm.1 | 2,21  | 0,004525 | 0,368648 Cassette Exon       | 0,13 |
| TC0400004194.mm.1 | -1,38 Ubr4   | PSR0400014423.mm.1 | 2,08  | 0,040238 | 0,541714 Cassette Exon       | 0,19 |
| TC0400004194.mm.1 | -1,38 Ubr4   | PSR0400014381.mm.1 | 2,08  | 0,022337 | 0,486348 Cassette Exon       | 0,12 |
| TC0400004194.mm.1 | -1,38 Ubr4   | JUC0400007576.mm.1 | 2,04  | 0,005684 | 0,382387                     |      |
| TC0200000395.mm.1 | 1,39 Nsmf    | JUC0200001004.mm.1 | 4,7   | 0,009157 | 0,413447                     |      |
| TC0200000395.mm.1 | 1,39 Nsmf    | PSR0200002144.mm.1 | 2,24  | 0,015576 | 0,454968 Cassette Exon       | 0,11 |
| TC0200000395.mm.1 | 1,39 Nsmf    | JUC0200000996.mm.1 | -2,41 | 0,044042 | 0,550824                     |      |
| TC1800000990.mm.1 | 1,07 Tmem241 | JUC1800004060.mm.1 | 4,69  | 0,00917  | 0,413447                     |      |



|                   |                          |                    |       |          |          |                     |      |
|-------------------|--------------------------|--------------------|-------|----------|----------|---------------------|------|
| TC1800000990.mm.1 | 1,07 Tmem241             | JUC1800004067.mm.1 | -2,49 | 0,015396 | 0,453964 |                     |      |
| TC0100003596.mm.1 | -1,15                    | JUC0100016791.mm.1 | 4,69  | 0,005535 | 0,380557 |                     |      |
| TC1700001113.mm.1 | 1,17 Dlgap1              | JUC1700005679.mm.1 | 4,68  | 0,005543 | 0,380603 |                     |      |
| TC1700001113.mm.1 | 1,17 Dlgap1              | PSR1700010483.mm.1 | 3,58  | 0,014457 | 0,44909  | Cassette Exon       | 0,35 |
| TC1700001113.mm.1 | 1,17 Dlgap1              | JUC1700005681.mm.1 | 3,58  | 0,038247 | 0,535883 |                     |      |
| TC1700001113.mm.1 | 1,17 Dlgap1              | PSR1700010480.mm.1 | 3,34  | 0,026962 | 0,502831 | Cassette Exon       | 0,33 |
| TC1700001113.mm.1 | 1,17 Dlgap1              | PSR1700010477.mm.1 | 3,27  | 0,006773 | 0,393372 | Cassette Exon       | 0,41 |
| TC0100003294.mm.1 | 1,14 Cacna1e             | JUC0100015330.mm.1 | 4,68  | 0,007766 | 0,402774 |                     |      |
| TC0100003294.mm.1 | 1,14 Cacna1e             | PSR0100026825.mm.1 | 2,35  | 0,000466 | 0,298999 | Cassette Exon       | 0,15 |
| TC1000000036.mm.1 | 1,2 Vip                  | JUC1000000126.mm.1 | 4,68  | 0,005941 | 0,385111 |                     |      |
| TC0400000485.mm.1 | 2,9 Frmpd1               | JUC0400001676.mm.1 | 4,67  | 0,004791 | 0,37131  |                     |      |
| TC0400000485.mm.1 | 2,9 Frmpd1               | PSR0400003408.mm.1 | 2,87  | 0,013964 | 0,446239 | Cassette Exon       | 0,31 |
| TC0400000485.mm.1 | 2,9 Frmpd1               | JUC0400001672.mm.1 | 2,31  | 0,014414 | 0,448786 |                     |      |
| TC0400000485.mm.1 | 2,9 Frmpd1               | PSR0400003421.mm.1 | 2,14  | 0,025925 | 0,49907  | Cassette Exon       | 0,18 |
| TC0400000485.mm.1 | 2,9 Frmpd1               | JUC0400001674.mm.1 | 2,07  | 0,040238 | 0,541714 |                     |      |
| TC0400000485.mm.1 | 2,9 Frmpd1               | PSR0400003414.mm.1 | 2,04  | 0,012147 | 0,432868 | Cassette Exon       | 0,11 |
| TC0400000485.mm.1 | 2,9 Frmpd1               | PSR0400003417.mm.1 | -2,11 | 0,002025 | 0,341377 | Cassette Exon       | 0,08 |
| TC0400000485.mm.1 | 2,9 Frmpd1               | PSR0400003406.mm.1 | -2,48 | 0,010237 | 0,420128 | Cassette Exon       | 0,14 |
| TC0100001806.mm.1 | 2,46 Esrrg               | JUC0100008541.mm.1 | 4,67  | 0,002949 | 0,352501 |                     |      |
| TC0100001806.mm.1 | 2,46 Esrrg               | PSR0100015005.mm.1 | -2,69 | 0,00799  | 0,403853 | Cassette Exon       | 0,29 |
| TC0100001806.mm.1 | 2,46 Esrrg               | PSR0100015003.mm.1 | -2,9  | 0,040522 | 0,54238  | Cassette Exon       | 0,18 |
| TC0100001806.mm.1 | 2,46 Esrrg               | JUC0100008532.mm.1 | -5,74 | 0,013888 | 0,445828 |                     |      |
| TC0800000741.mm.1 | 1,04 Sugp2; LOC100503831 | JUC0800002731.mm.1 | 4,67  | 0,000798 | 0,311765 |                     |      |
| TC0800000741.mm.1 | 1,04 Sugp2; LOC100503831 | PSR0800005144.mm.1 | 2,26  | 0,014088 | 0,446971 | Alternative 5' Donc | 0,14 |
| TC0800000741.mm.1 | 1,04 Sugp2; LOC100503831 | PSR0800005147.mm.1 | 2,24  | 0,011377 | 0,427487 | Alternative 3' Acce | 0,18 |
| TC0X00000059.mm.1 | 6,68 Cacna1f             | JUC0X00000095.mm.1 | 4,64  | 0,002844 | 0,352207 |                     |      |
| TC0X00000059.mm.1 | 6,68 Cacna1f             | JUC0X00000096.mm.1 | 3,33  | 0,008814 | 0,410077 |                     |      |
| TC0X00000059.mm.1 | 6,68 Cacna1f             | JUC0X00000098.mm.1 | 2,94  | 0,009551 | 0,416698 |                     |      |
| TC0X00000059.mm.1 | 6,68 Cacna1f             | PSR0X00000227.mm.1 | 2,3   | 0,005525 | 0,380518 | Cassette Exon       | 0,25 |
| TC0X00000059.mm.1 | 6,68 Cacna1f             | JUC0X00000092.mm.1 | 2,21  | 0,041841 | 0,545586 |                     |      |
| TC0X00000059.mm.1 | 6,68 Cacna1f             | PSR0X00000220.mm.1 | -2,09 | 0,022673 | 0,487625 | Cassette Exon       | 0,11 |
| TC0X00000059.mm.1 | 6,68 Cacna1f             | PSR0X00000260.mm.1 | -2,2  | 0,007057 | 0,396413 | Alternative 3' Acce | 0,33 |
| TC0X00000059.mm.1 | 6,68 Cacna1f             | PSR0X00000263.mm.1 | -2,26 | 0,024023 | 0,492873 | Alternative 5' Donc | 0,2  |
| TC0X00000059.mm.1 | 6,68 Cacna1f             | JUC0X00000117.mm.1 | -2,27 | 0,005247 | 0,377696 |                     |      |
| TC0X00000059.mm.1 | 6,68 Cacna1f             | PSR0X00000226.mm.1 | -2,33 | 0,018204 | 0,467586 | Intron Retention    | 0,33 |
| TC0X00000059.mm.1 | 6,68 Cacna1f             | JUC0X00000129.mm.1 | -2,47 | 0,046546 | 0,55676  |                     |      |
| TC0X00000059.mm.1 | 6,68 Cacna1f             | JUC0X00000091.mm.1 | -2,5  | 0,002463 | 0,349135 |                     |      |
| TC0X00000059.mm.1 | 6,68 Cacna1f             | PSR0X00000233.mm.1 | -2,84 | 0,001903 | 0,338712 | Cassette Exon       | 0,3  |
| TC0X00000059.mm.1 | 6,68 Cacna1f             | JUC0X00000116.mm.1 | -3,29 | 0,009275 | 0,41476  |                     |      |
| TC0X00000059.mm.1 | 6,68 Cacna1f             | JUC0X00000114.mm.1 | -3,33 | 0,039732 | 0,540494 |                     |      |
| TC0X00000059.mm.1 | 6,68 Cacna1f             | JUC0X00000102.mm.1 | -3,38 | 0,001124 | 0,317328 |                     |      |
| TC0X00000059.mm.1 | 6,68 Cacna1f             | PSR0X00000270.mm.1 | -3,48 | 0,000118 | 0,269605 | Cassette Exon       | 0,34 |
| TC0X00000059.mm.1 | 6,68 Cacna1f             | JUC0X00000132.mm.1 | -3,53 | 0,028302 | 0,506691 |                     |      |
| TC0X00000059.mm.1 | 6,68 Cacna1f             | JUC0X00000127.mm.1 | -3,56 | 0,024735 | 0,494884 |                     |      |
| TC0X00000059.mm.1 | 6,68 Cacna1f             | PSR0X00000268.mm.1 | -3,64 | 0,002649 | 0,349612 | Alternative 5' Donc | 0,45 |
| TC0X00000059.mm.1 | 6,68 Cacna1f             | PSR0X00000278.mm.1 | -3,72 | 0,000027 | 0,229631 | Intron Retention    | 0,52 |
| TC0X00000059.mm.1 | 6,68 Cacna1f             | JUC0X00000110.mm.1 | -3,75 | 0,009946 | 0,41841  |                     |      |
| TC0X00000059.mm.1 | 6,68 Cacna1f             | JUC0X00000141.mm.1 | -3,78 | 0,033504 | 0,523014 |                     |      |

|                   |       |              |                    |        |          |          |                     |      |
|-------------------|-------|--------------|--------------------|--------|----------|----------|---------------------|------|
| TCOX00000059.mm.1 | 6,68  | Cacna1f      | PSROX00000255.mm.1 | -3,94  | 0,000802 | 0,311765 | Alternative 3' Acce | 0,49 |
| TCOX00000059.mm.1 | 6,68  | Cacna1f      | PSROX00000241.mm.1 | -4,42  | 0,002676 | 0,349612 | Cassette Exon       | 0,55 |
| TCOX00000059.mm.1 | 6,68  | Cacna1f      | PSROX00000240.mm.1 | -4,45  | 0,004178 | 0,362543 | Alternative 5' Donc | 0,33 |
| TCOX00000059.mm.1 | 6,68  | Cacna1f      | PSROX00000264.mm.1 | -4,65  | 0,003638 | 0,356619 | Alternative 3' Acce | 0,44 |
| TCOX00000059.mm.1 | 6,68  | Cacna1f      | PSROX00000242.mm.1 | -5,11  | 0,000092 | 0,255472 | Cassette Exon       | 0,07 |
| TCOX00000059.mm.1 | 6,68  | Cacna1f      | JUCOX00000131.mm.1 | -5,17  | 0,008278 | 0,405976 |                     |      |
| TCOX00000059.mm.1 | 6,68  | Cacna1f      | JUCOX00000136.mm.1 | -5,19  | 0,004265 | 0,363868 |                     |      |
| TCOX00000059.mm.1 | 6,68  | Cacna1f      | PSROX00000286.mm.1 | -5,43  | 0,002301 | 0,346364 | Alternative 5' Donc | 0,38 |
| TCOX00000059.mm.1 | 6,68  | Cacna1f      | JUCOX00000134.mm.1 | -5,47  | 0,009476 | 0,416553 |                     |      |
| TCOX00000059.mm.1 | 6,68  | Cacna1f      | PSROX00000230.mm.1 | -5,78  | 0,019458 | 0,474165 | Alternative 5' Donc | 0,48 |
| TCOX00000059.mm.1 | 6,68  | Cacna1f      | JUCOX00000140.mm.1 | -5,83  | 0,006564 | 0,39213  |                     |      |
| TCOX00000059.mm.1 | 6,68  | Cacna1f      | PSROX00000245.mm.1 | -7,1   | 0,002743 | 0,349639 | Intron Retention    | 0,63 |
| TCOX00000059.mm.1 | 6,68  | Cacna1f      | JUCOX00000109.mm.1 | -7,68  | 0,000831 | 0,311886 |                     |      |
| TCOX00000059.mm.1 | 6,68  | Cacna1f      | JUCOX00000107.mm.1 | -9,52  | 0,00263  | 0,349612 |                     |      |
| TCOX00000059.mm.1 | 6,68  | Cacna1f      | JUCOX00000143.mm.1 | -9,71  | 0,005101 | 0,375768 |                     |      |
| TCOX00000059.mm.1 | 6,68  | Cacna1f      | JUCOX00000100.mm.1 | -13,2  | 0,000979 | 0,314913 |                     |      |
| TCOX00000059.mm.1 | 6,68  | Cacna1f      | JUCOX00000108.mm.1 | -13,86 | 0,001154 | 0,317344 |                     |      |
| TCOX00000059.mm.1 | 6,68  | Cacna1f      | JUCOX00000142.mm.1 | -16,33 | 0,030545 | 0,51337  |                     |      |
| TC1400002086.mm.1 | 4,54  | Nrl          | JUC1400008679.mm.1 | 4,64   | 0,006537 | 0,391916 |                     |      |
| TC1400002086.mm.1 | 4,54  | Nrl          | PSR1400015886.mm.1 | 2,28   | 0,031495 | 0,516965 | Cassette Exon       | 0,26 |
| TC1400002086.mm.1 | 4,54  | Nrl          | PSR1400015890.mm.1 | -2,2   | 0,009192 | 0,413763 | Alternative 5' Donc | 0,3  |
| TC1400002086.mm.1 | 4,54  | Nrl          | JUC1400008682.mm.1 | -3,42  | 0,02945  | 0,510051 |                     |      |
| TC1400002086.mm.1 | 4,54  | Nrl          | PSR1400015891.mm.1 | -4,77  | 0,012444 | 0,43528  | Cassette Exon       | 0,37 |
| TC1400002086.mm.1 | 4,54  | Nrl          | PSR1400015883.mm.1 | -5,78  | 0,001311 | 0,323877 | Alternative 3' Acce | 0,48 |
| TC1400002086.mm.1 | 4,54  | Nrl          | JUC1400008680.mm.1 | -7,2   | 0,021726 | 0,484124 |                     |      |
| TC1200000580.mm.1 | 1,52  | Atl1; Gm3086 | JUC1200002154.mm.1 | 4,64   | 0,03866  | 0,537102 |                     |      |
| TC1200000580.mm.1 | 1,52  | Atl1; Gm3086 | PSR1200003913.mm.1 | -2,31  | 0,023099 | 0,489699 | Cassette Exon       | 0,15 |
| TC1200000580.mm.1 | 1,52  | Atl1; Gm3086 | JUC1200002165.mm.1 | -2,56  | 0,043164 | 0,548758 |                     |      |
| TC1200000580.mm.1 | 1,52  | Atl1; Gm3086 | PSR1200003897.mm.1 | -3,53  | 0,04219  | 0,546939 | Alternative 3' Acce | 0,41 |
| TC1500001038.mm.1 | -1,69 | Atf1; Gm1862 | JUC1500004646.mm.1 | 4,63   | 0,036211 | 0,530149 |                     |      |
| TC1500001038.mm.1 | -1,69 | Atf1; Gm1862 | PSR1500008207.mm.1 | 2,89   | 0,007305 | 0,398847 | Alternative 5' Donc | 0,16 |
| TC0500002557.mm.1 | 1,07  | Gabrg1       | JUC0500012294.mm.1 | 4,63   | 0,008833 | 0,410293 |                     |      |
| TC1000000896.mm.1 | 2,51  | Dohh         | PSR1000007097.mm.1 | 4,62   | 0,042217 | 0,546983 | Alternative 5' Donc | 0,47 |
| TC1000000896.mm.1 | 2,51  | Dohh         | PSR1000007090.mm.1 | -2,04  | 0,000306 | 0,288663 | Cassette Exon       | 0,04 |
| TC1000000896.mm.1 | 2,51  | Dohh         | PSR1000007087.mm.1 | -2,06  | 0,000808 | 0,311886 | Cassette Exon       | 0,35 |
| TC1000000896.mm.1 | 2,51  | Dohh         | PSR1000007081.mm.1 | -2,18  | 0,002909 | 0,352289 | Alternative 5' Donc | 0,16 |
| TC1000000896.mm.1 | 2,51  | Dohh         | PSR1000007089.mm.1 | -2,37  | 0,005218 | 0,377078 | Alternative 5' Donc | 0,16 |
| TC1000000896.mm.1 | 2,51  | Dohh         | PSR1000007080.mm.1 | -2,38  | 0,028547 | 0,507497 | Cassette Exon       | 0,14 |
| TC1000000896.mm.1 | 2,51  | Dohh         | PSR1000007085.mm.1 | -2,61  | 0,003103 | 0,353892 | Cassette Exon       | 0,35 |
| TC1000000896.mm.1 | 2,51  | Dohh         | JUC1000003835.mm.1 | -2,64  | 0,015319 | 0,453644 |                     |      |
| TC1000000896.mm.1 | 2,51  | Dohh         | PSR1000007078.mm.1 | -2,74  | 0,000509 | 0,303579 | Cassette Exon       | 0,14 |
| TC1000000896.mm.1 | 2,51  | Dohh         | PSR1000007082.mm.1 | -3,11  | 0,000478 | 0,298999 | Alternative 5' Donc | 0,16 |
| TC1000000896.mm.1 | 2,51  | Dohh         | PSR1000007077.mm.1 | -3,41  | 0,004629 | 0,369804 | Alternative 5' Donc | 0,31 |
| TC1000000896.mm.1 | 2,51  | Dohh         | PSR1000007086.mm.1 | -3,68  | 0,000036 | 0,238339 | Cassette Exon       | 0,35 |
| TC1000000896.mm.1 | 2,51  | Dohh         | JUC1000003834.mm.1 | -3,69  | 0,005796 | 0,383104 |                     |      |
| TC1000000896.mm.1 | 2,51  | Dohh         | JUC1000003836.mm.1 | -4,08  | 0,002066 | 0,341993 |                     |      |
| TC0800001429.mm.1 | 1,3   | Klhl36       | JUC0800006383.mm.1 | 4,62   | 0,042086 | 0,546486 |                     |      |
| TC0800001429.mm.1 | 1,3   | Klhl36       | PSR0800011643.mm.1 | 2,4    | 0,006473 | 0,390467 | Cassette Exon       | 0,32 |

|                   |                                         |                    |       |          |          |                     |      |
|-------------------|-----------------------------------------|--------------------|-------|----------|----------|---------------------|------|
| TC0800001429.mm.1 | 1,3 Khl36                               | JUC0800006384.mm.1 | 2,18  | 0,004878 | 0,372195 |                     |      |
| TC0800001429.mm.1 | 1,3 Khl36                               | PSR0800011644.mm.1 | 2,16  | 0,026201 | 0,50003  | Cassette Exon       | 0,14 |
| TC0800000637.mm.1 | 1,3 Gm15882                             | PSR0800004265.mm.1 | 4,61  | 0,00626  | 0,388622 | Cassette Exon       | 0,28 |
| TC0800000637.mm.1 | 1,3 Gm15882                             | PSR0800004264.mm.1 | -4,61 | 0,00626  | 0,388622 | Cassette Exon       | 0,28 |
| TC0500001773.mm.1 | -1,07 Cyp3a57                           | JUC0500008946.mm.1 | 4,61  | 0,002018 | 0,34123  |                     |      |
| TC0300002926.mm.1 | -1,04 Enpep                             | JUC0300012081.mm.1 | 4,61  | 0,001763 | 0,336201 |                     |      |
| TC0400003803.mm.1 | -1,6 Cdc42                              | JUC0400016310.mm.1 | 4,61  | 0,011457 | 0,427947 |                     |      |
| TC0100000696.mm.1 | -1,32 1700016L21Rik                     | JUC0100003399.mm.1 | 4,58  | 0,041245 | 0,544166 |                     |      |
| TC0900000019.mm.1 | -1,11 Gucy1a2                           | PSR0900000183.mm.1 | 4,58  | 0,008509 | 0,407344 |                     |      |
| TC0900000019.mm.1 | -1,11 Gucy1a2                           | JUC0900000096.mm.1 | 2,88  | 0,012023 | 0,432286 |                     |      |
| TC0600001463.mm.1 | 3,44 Ano2                               | JUC0600006374.mm.1 | 4,56  | 0,001156 | 0,317344 |                     |      |
| TC0600001463.mm.1 | 3,44 Ano2                               | JUC0600006388.mm.1 | 3,51  | 0,013009 | 0,439291 |                     |      |
| TC0600001463.mm.1 | 3,44 Ano2                               | JUC0600006371.mm.1 | 2,96  | 0,006857 | 0,39401  |                     |      |
| TC0600001463.mm.1 | 3,44 Ano2                               | JUC0600006370.mm.1 | 2,7   | 0,004758 | 0,371039 |                     |      |
| TC0600001463.mm.1 | 3,44 Ano2                               | PSR0600012088.mm.1 | 2,39  | 0,002152 | 0,343789 | Cassette Exon       | 0,17 |
| TC0600001463.mm.1 | 3,44 Ano2                               | JUC0600006378.mm.1 | 2,27  | 0,006664 | 0,393187 |                     |      |
| TC0600001463.mm.1 | 3,44 Ano2                               | PSR0600012106.mm.1 | -2,18 | 0,032115 | 0,518585 | Cassette Exon       | 0,1  |
| TC0600001463.mm.1 | 3,44 Ano2                               | JUC0600006386.mm.1 | -2,42 | 0,035662 | 0,528966 |                     |      |
| TC0600001463.mm.1 | 3,44 Ano2                               | PSR0600012097.mm.1 | -2,6  | 0,000066 | 0,250119 | Cassette Exon       | 0,06 |
| TC0600001463.mm.1 | 3,44 Ano2                               | JUC0600006396.mm.1 | -2,89 | 0,016286 | 0,458454 |                     |      |
| TC0600001463.mm.1 | 3,44 Ano2                               | PSR0600012093.mm.1 | -3,11 | 0,030869 | 0,514456 | Cassette Exon       | 0,13 |
| TC0600001463.mm.1 | 3,44 Ano2                               | PSR0600012101.mm.1 | -3,23 | 0,007706 | 0,402552 | Cassette Exon       | 0,1  |
| TC0600001463.mm.1 | 3,44 Ano2                               | PSR0600012072.mm.1 | -3,58 | 0,005047 | 0,374728 | Cassette Exon       | 0,24 |
| TC0600001463.mm.1 | 3,44 Ano2                               | PSR0600012076.mm.1 | -3,62 | 0,007142 | 0,397526 | Cassette Exon       | 0,44 |
| TC0600001463.mm.1 | 3,44 Ano2                               | PSR0600012096.mm.1 | -3,87 | 0,006733 | 0,393343 | Alternative 5' Donc | 0,5  |
| TC0600001463.mm.1 | 3,44 Ano2                               | JUC0600006395.mm.1 | -5,03 | 0,007355 | 0,399339 |                     |      |
| TC0600001463.mm.1 | 3,44 Ano2                               | JUC0600006397.mm.1 | -6,07 | 0,004025 | 0,361567 |                     |      |
| TC0600001463.mm.1 | 3,44 Ano2                               | JUC0600006383.mm.1 | -6,62 | 0,000702 | 0,30566  |                     |      |
| TC0900001481.mm.1 | -2,73 Ltf                               | JUC0900006940.mm.1 | 4,56  | 0,038126 | 0,535709 |                     |      |
| TC0700000047.mm.1 | -1,13 Isoc2a                            | JUC0700000284.mm.1 | 4,56  | 0,00413  | 0,3623   |                     |      |
| TC0X00001277.mm.1 | 1,12 Drp2                               | JUC0X00003918.mm.1 | 4,56  | 0,018161 | 0,467432 |                     |      |
| TC1200002311.mm.1 | 1,36 Atg2b                              | JUC1200008930.mm.1 | 4,55  | 0,023178 | 0,489982 |                     |      |
| TC1200002311.mm.1 | 1,36 Atg2b                              | JUC1200008937.mm.1 | 2,57  | 0,008346 | 0,406435 |                     |      |
| TC1200002311.mm.1 | 1,36 Atg2b                              | JUC1200008901.mm.1 | -2,6  | 0,036275 | 0,530445 |                     |      |
| TC1800000908.mm.1 | 1,11 Rttm; Mir6359; mmu-mir- $\epsilon$ | JUC1800003630.mm.1 | 4,55  | 0,014086 | 0,446959 |                     |      |
| TC1800000908.mm.1 | 1,11 Rttm; Mir6359; mmu-mir- $\epsilon$ | JUC1800003635.mm.1 | 2,15  | 0,041808 | 0,545586 |                     |      |
| TC1000002259.mm.1 | 1,13 Vps26a                             | JUC1000008832.mm.1 | 4,55  | 0,017381 | 0,463704 |                     |      |
| TC1000002259.mm.1 | 1,13 Vps26a                             | JUC1000008839.mm.1 | 2,82  | 0,041083 | 0,543902 |                     |      |
| TC1000000813.mm.1 | 1,48 Hcn2                               | JUC1000003200.mm.1 | 4,55  | 0,005918 | 0,384299 |                     |      |
| TC0500001587.mm.1 | 1,87 Srrm3                              | PSR0500014329.mm.1 | 4,54  | 0,016712 | 0,460199 | Cassette Exon       | 0,49 |
| TC0500001587.mm.1 | 1,87 Srrm3                              | JUC0500007814.mm.1 | 4,16  | 0,009856 | 0,417898 |                     |      |
| TC0500001587.mm.1 | 1,87 Srrm3                              | JUC0500007811.mm.1 | 3,3   | 0,004354 | 0,365487 |                     |      |
| TC0500001587.mm.1 | 1,87 Srrm3                              | JUC0500007813.mm.1 | 2,71  | 0,033155 | 0,521956 |                     |      |
| TC0500001587.mm.1 | 1,87 Srrm3                              | PSR0500014338.mm.1 | -3,16 | 0,002927 | 0,352289 | Cassette Exon       | 0,23 |
| TC1900001045.mm.1 | 1,32 Rtn3; A830039H05Rik                | JUC1900005347.mm.1 | 4,54  | 0,002314 | 0,346468 |                     |      |
| TC1900001045.mm.1 | 1,32 Rtn3; A830039H05Rik                | JUC1900005345.mm.1 | 2,96  | 0,00905  | 0,412827 |                     |      |
| TC1900001045.mm.1 | 1,32 Rtn3; A830039H05Rik                | JUC1900005343.mm.1 | 2,35  | 0,046737 | 0,556856 |                     |      |
| TC0500000926.mm.1 | -1,22 Fras1                             | JUC0500004352.mm.1 | 4,54  | 0,037699 | 0,534511 |                     |      |

|                   |               |                    |        |          |          |                     |      |
|-------------------|---------------|--------------------|--------|----------|----------|---------------------|------|
| TC0600002166.mm.1 | 1,14 Fam131b  | JUC0600008972.mm.1 | 4,54   | 0,046165 | 0,555838 |                     |      |
| TC0300001999.mm.1 | 1,43 Nbea     | JUC0300008023.mm.1 | 4,54   | 0,022285 | 0,486062 |                     |      |
| TC0300001999.mm.1 | 1,43 Nbea     | JUC0300008027.mm.1 | 2,94   | 0,00347  | 0,355628 |                     |      |
| TC0300001999.mm.1 | 1,43 Nbea     | JUC0300008001.mm.1 | 2,55   | 0,006992 | 0,395722 |                     |      |
| TC0300001999.mm.1 | 1,43 Nbea     | JUC0300008000.mm.1 | 2,31   | 0,007562 | 0,401384 |                     |      |
| TC0300001999.mm.1 | 1,43 Nbea     | JUC0300008022.mm.1 | 2,28   | 0,040827 | 0,543283 |                     |      |
| TC0300001999.mm.1 | 1,43 Nbea     | JUC0300008015.mm.1 | -2,28  | 0,046785 | 0,55703  |                     |      |
| TCOX00000957.mm.1 | 9,1 Arr3      | JUCOX00003025.mm.1 | 4,53   | 0,000947 | 0,313363 |                     |      |
| TCOX00000957.mm.1 | 9,1 Arr3      | JUCOX00003030.mm.1 | 2,07   | 0,026919 | 0,502543 |                     |      |
| TCOX00000957.mm.1 | 9,1 Arr3      | JUCOX00003036.mm.1 | -2,55  | 0,032009 | 0,518367 |                     |      |
| TCOX00000957.mm.1 | 9,1 Arr3      | PSROX00006195.mm.1 | -2,72  | 0,042823 | 0,548097 | Cassette Exon       | 0,29 |
| TCOX00000957.mm.1 | 9,1 Arr3      | PSROX00006179.mm.1 | -3,02  | 0,019956 | 0,476103 | Intron Retention    | 0,48 |
| TCOX00000957.mm.1 | 9,1 Arr3      | JUCOX00003035.mm.1 | -3,32  | 0,002445 | 0,349135 |                     |      |
| TCOX00000957.mm.1 | 9,1 Arr3      | PSROX00006170.mm.1 | -3,83  | 0,002537 | 0,349501 | Cassette Exon       | 0,36 |
| TCOX00000957.mm.1 | 9,1 Arr3      | PSROX00006186.mm.1 | -4,02  | 0,01971  | 0,474887 | Alternative 3' Acce | 0,49 |
| TCOX00000957.mm.1 | 9,1 Arr3      | PSROX00006173.mm.1 | -6,56  | 0,013755 | 0,444758 | Alternative 5' Donc | 0,64 |
| TCOX00000957.mm.1 | 9,1 Arr3      | JUCOX00003037.mm.1 | -6,81  | 0,030394 | 0,512923 |                     |      |
| TCOX00000957.mm.1 | 9,1 Arr3      | JUCOX00003028.mm.1 | -8,68  | 0,000026 | 0,229534 |                     |      |
| TCOX00000957.mm.1 | 9,1 Arr3      | PSROX00006169.mm.1 | -9,44  | 0,02338  | 0,490202 | Cassette Exon       | 0,41 |
| TCOX00000957.mm.1 | 9,1 Arr3      | JUCOX00003039.mm.1 | -48,08 | 0,010875 | 0,424174 |                     |      |
| TC0100001060.mm.1 | 1,26 Clasp1   | JUC0100005054.mm.1 | 4,53   | 0,003144 | 0,353892 |                     |      |
| TC0100001060.mm.1 | 1,26 Clasp1   | JUC0100005059.mm.1 | 3,34   | 0,001652 | 0,334162 |                     |      |
| TC0100001060.mm.1 | 1,26 Clasp1   | JUC0100005083.mm.1 | -2,34  | 0,024406 | 0,4937   |                     |      |
| TC1100002426.mm.1 | 1,15 Eml6     | JUC1100011778.mm.1 | 4,52   | 0,004228 | 0,363295 |                     |      |
| TC1100002426.mm.1 | 1,15 Eml6     | JUC1100011791.mm.1 | 2,92   | 0,002112 | 0,342919 |                     |      |
| TC1100002426.mm.1 | 1,15 Eml6     | PSR1100022702.mm.1 | 2,71   | 0,033968 | 0,524252 | Cassette Exon       | 0,2  |
| TC1100002426.mm.1 | 1,15 Eml6     | JUC1100011808.mm.1 | 2,68   | 0,019017 | 0,471745 |                     |      |
| TC1100002426.mm.1 | 1,15 Eml6     | JUC1100011796.mm.1 | 2,65   | 0,021781 | 0,48438  |                     |      |
| TC1100002426.mm.1 | 1,15 Eml6     | JUC1100011785.mm.1 | 2,51   | 0,001038 | 0,316361 |                     |      |
| TC1100002426.mm.1 | 1,15 Eml6     | JUC1100011792.mm.1 | 2,51   | 0,040181 | 0,541655 |                     |      |
| TC1100002426.mm.1 | 1,15 Eml6     | PSR1100022720.mm.1 | 2,42   | 0,004018 | 0,361353 | Cassette Exon       | 0,22 |
| TC1100002426.mm.1 | 1,15 Eml6     | PSR1100022717.mm.1 | 2,25   | 0,012426 | 0,43528  | Cassette Exon       | 0,11 |
| TC1100002426.mm.1 | 1,15 Eml6     | PSR1100022698.mm.1 | 2,17   | 0,003038 | 0,353813 | Cassette Exon       | 0,21 |
| TC1100002426.mm.1 | 1,15 Eml6     | PSR1100022718.mm.1 | 2,15   | 0,000883 | 0,312378 | Cassette Exon       | 0,11 |
| TC1100002426.mm.1 | 1,15 Eml6     | PSR1100022692.mm.1 | -4,23  | 0,023993 | 0,492783 | Alternative 3' Acce | 0,46 |
| TC1600001607.mm.1 | -1,01 Poglut1 | JUC1600006848.mm.1 | 4,52   | 0,010248 | 0,420147 |                     |      |
| TC0400002119.mm.1 | -1,68 Gm11787 | JUC0400009366.mm.1 | 4,52   | 0,018857 | 0,470956 |                     |      |
| TC0800002632.mm.1 | 1,07 Siah1a   | PSR0800020223.mm.1 | 4,51   | 0,014185 | 0,447608 | Alternative 3' Acce | 0,43 |
| TC1000000160.mm.1 | 1,74 Ahi1     | JUC100000607.mm.1  | 4,51   | 0,007893 | 0,403819 |                     |      |
| TC1000000160.mm.1 | 1,74 Ahi1     | PSR1000001149.mm.1 | 2,67   | 0,004532 | 0,368648 | Cassette Exon       | 0,32 |
| TC1000000160.mm.1 | 1,74 Ahi1     | JUC100000600.mm.1  | 2,24   | 0,026728 | 0,502096 |                     |      |
| TC1000000160.mm.1 | 1,74 Ahi1     | JUC100000609.mm.1  | 2,15   | 0,003123 | 0,353892 |                     |      |
| TC1000000160.mm.1 | 1,74 Ahi1     | PSR1000001150.mm.1 | 2,05   | 0,008259 | 0,405976 | Cassette Exon       | 0,18 |
| TC0400000162.mm.1 | 2,01 Cngb3    | JUC0400000491.mm.1 | 4,51   | 0,00731  | 0,398847 |                     |      |
| TC0400000162.mm.1 | 2,01 Cngb3    | PSR0400001005.mm.1 | -2,18  | 0,020327 | 0,477245 | Cassette Exon       | 0,17 |
| TC0400000162.mm.1 | 2,01 Cngb3    | PSR0400001006.mm.1 | -2,26  | 0,038436 | 0,536405 | Cassette Exon       | 0,12 |
| TC0300002371.mm.1 | -1,42 Npr1    | JUC0300009659.mm.1 | 4,51   | 0,01716  | 0,46232  |                     |      |
| TC0300002371.mm.1 | -1,42 Npr1    | JUC0300009667.mm.1 | 2,58   | 0,007737 | 0,402774 |                     |      |

|                   |               |                    |       |          |                              |      |
|-------------------|---------------|--------------------|-------|----------|------------------------------|------|
| TC0300002371.mm.1 | -1,42 Npr1    | JUC0300009676.mm.1 | 2,26  | 0,005901 | 0,383835                     |      |
| TC0300002371.mm.1 | -1,42 Npr1    | PSR0300018461.mm.1 | 2,02  | 0,037356 | 0,533577 Cassette Exon       | 0,13 |
| TC1700002155.mm.1 | 2,01 Tmem63b  | JUC1700010755.mm.1 | 4,5   | 0,002506 | 0,349237                     |      |
| TC1700002155.mm.1 | 2,01 Tmem63b  | PSR1700020249.mm.1 | -2,07 | 0,037461 | 0,533948 Cassette Exon       | 0,15 |
| TC1500001993.mm.1 | 1,79 Phf21b   | JUC1500008974.mm.1 | 4,49  | 0,024848 | 0,495511                     |      |
| TC1500001993.mm.1 | 1,79 Phf21b   | PSR1500015816.mm.1 | 2,2   | 0,010872 | 0,424174 Cassette Exon       | 0,11 |
| TC1500001993.mm.1 | 1,79 Phf21b   | PSR1500015810.mm.1 | -2,13 | 0,000297 | 0,288663 Alternative 5' Donc | 0,19 |
| TC1500001993.mm.1 | 1,79 Phf21b   | PSR1500015806.mm.1 | -2,2  | 0,03684  | 0,532256 Alternative 5' Donc | 0,22 |
| TC1500001993.mm.1 | 1,79 Phf21b   | PSR1500015819.mm.1 | -2,2  | 0,032844 | 0,520984                     |      |
| TC1500001993.mm.1 | 1,79 Phf21b   | JUC1500008980.mm.1 | -2,84 | 0,014345 | 0,448202                     |      |
| TC0800003161.mm.1 | -2,9 Acta1    | PSR0800024257.mm.1 | 4,48  | 0,02008  | 0,476581 Alternative 5' Donc | 0,48 |
| TC0700003804.mm.1 | -1,11 Slco2b1 | JUC0700016938.mm.1 | 4,48  | 0,002295 | 0,346364                     |      |
| TC1000000265.mm.1 | -1,56 Echdc1  | JUC1000000996.mm.1 | 4,48  | 0,012014 | 0,432286                     |      |
| TC0700002946.mm.1 | 1 Iglon5      | PSR0700026091.mm.1 | 4,47  | 0,019749 | 0,474932 Cassette Exon       | 0,26 |
| TC1600001519.mm.1 | 1,44 lqcg     | JUC1600006487.mm.1 | 4,46  | 0,002057 | 0,341838                     |      |
| TC0900001113.mm.1 | 1,21 Tpbg     | JUC0900004731.mm.1 | 4,46  | 0,039747 | 0,540496                     |      |
| TC0500003532.mm.1 | 2,77 Mmd2     | JUC0500017612.mm.1 | 4,45  | 0,00377  | 0,357586                     |      |
| TC0500003532.mm.1 | 2,77 Mmd2     | PSR0500032366.mm.1 | 2,81  | 0,02027  | 0,477245 Cassette Exon       | 0,19 |
| TC0500003532.mm.1 | 2,77 Mmd2     | PSR0500032358.mm.1 | -3,57 | 0,030428 | 0,513134 Alternative 3' Acce | 0,41 |
| TC1700002492.mm.1 | 1,04 Smchd1   | JUC1700012242.mm.1 | 4,45  | 0,029056 | 0,508954                     |      |
| TC1700002492.mm.1 | 1,04 Smchd1   | JUC1700012234.mm.1 | 2,46  | 0,012084 | 0,43255                      |      |
| TC0400004094.mm.1 | 4,64 Rnf207   | JUC0400017790.mm.1 | 4,44  | 0,001814 | 0,336883                     |      |
| TC0400004094.mm.1 | 4,64 Rnf207   | PSR0400034104.mm.1 | 3,71  | 0,001591 | 0,331726 Cassette Exon       | 0,15 |
| TC0400004094.mm.1 | 4,64 Rnf207   | PSR0400034127.mm.1 | 3,26  | 0,000287 | 0,28803 Cassette Exon        | 0,07 |
| TC0400004094.mm.1 | 4,64 Rnf207   | PSR0400034101.mm.1 | 2,51  | 0,025919 | 0,499027                     |      |
| TC0400004094.mm.1 | 4,64 Rnf207   | PSR0400034102.mm.1 | 2,12  | 0,008436 | 0,406611 Alternative 3' Acce | 0,31 |
| TC0400004094.mm.1 | 4,64 Rnf207   | PSR0400034130.mm.1 | -2,14 | 0,003543 | 0,3562 Alternative 5' Donc   | 0,21 |
| TC0400004094.mm.1 | 4,64 Rnf207   | PSR0400034138.mm.1 | -2,42 | 0,000448 | 0,297771 Cassette Exon       | 0,27 |
| TC0400004094.mm.1 | 4,64 Rnf207   | PSR0400034126.mm.1 | -2,44 | 0,003285 | 0,354243 Intron Retention    | 0,36 |
| TC0400004094.mm.1 | 4,64 Rnf207   | PSR0400034144.mm.1 | -2,75 | 0,013935 | 0,446202 Alternative 5' Donc | 0,33 |
| TC0400004094.mm.1 | 4,64 Rnf207   | PSR0400034136.mm.1 | -2,89 | 0,000587 | 0,304044 Intron Retention    | 0,08 |
| TC0400004094.mm.1 | 4,64 Rnf207   | PSR0400034134.mm.1 | -3,05 | 0,010537 | 0,422281 Alternative 5' Donc | 0,36 |
| TC0400004094.mm.1 | 4,64 Rnf207   | PSR0400034128.mm.1 | -3,37 | 0,019452 | 0,474131 Intron Retention    | 0,59 |
| TC0400004094.mm.1 | 4,64 Rnf207   | JUC0400017797.mm.1 | -3,38 | 0,010118 | 0,419126                     |      |
| TC0400004094.mm.1 | 4,64 Rnf207   | PSR0400034141.mm.1 | -3,4  | 0,003178 | 0,354243 Alternative 5' Donc | 0,33 |
| TC0400004094.mm.1 | 4,64 Rnf207   | PSR0400034122.mm.1 | -3,47 | 0,003526 | 0,355858 Cassette Exon       | 0,19 |
| TC0400004094.mm.1 | 4,64 Rnf207   | PSR0400034135.mm.1 | -3,85 | 0,002323 | 0,3467 Cassette Exon         | 0,53 |
| TC0400004094.mm.1 | 4,64 Rnf207   | JUC0400017798.mm.1 | -3,86 | 0,002452 | 0,349135                     |      |
| TC0400004094.mm.1 | 4,64 Rnf207   | PSR0400034107.mm.1 | -3,87 | 0,006045 | 0,386586                     |      |
| TC0400004094.mm.1 | 4,64 Rnf207   | JUC0400017783.mm.1 | -4,01 | 0,005579 | 0,381035                     |      |
| TC0400004094.mm.1 | 4,64 Rnf207   | PSR0400034137.mm.1 | -4,02 | 0,016054 | 0,457283 Intron Retention    | 0,34 |
| TC0400004094.mm.1 | 4,64 Rnf207   | PSR0400034109.mm.1 | -4,06 | 0,008572 | 0,40821                      |      |
| TC0400004094.mm.1 | 4,64 Rnf207   | JUC0400017794.mm.1 | -4,82 | 0,001764 | 0,336311                     |      |
| TC0400004094.mm.1 | 4,64 Rnf207   | JUC0400017799.mm.1 | -4,88 | 0,000993 | 0,316361                     |      |
| TC0400004094.mm.1 | 4,64 Rnf207   | PSR0400034108.mm.1 | -4,9  | 0,005467 | 0,379939 Cassette Exon       | 0,32 |
| TC0400004094.mm.1 | 4,64 Rnf207   | PSR0400034100.mm.1 | -5,08 | 0,003336 | 0,354243 Alternative 5' Donc | 0,4  |
| TC0400004094.mm.1 | 4,64 Rnf207   | JUC0400017803.mm.1 | -5,17 | 0,012671 | 0,43631                      |      |
| TC0400004094.mm.1 | 4,64 Rnf207   | JUC0400017795.mm.1 | -5,62 | 0,016375 | 0,458693                     |      |

|                   |                             |                    |       |          |                              |      |
|-------------------|-----------------------------|--------------------|-------|----------|------------------------------|------|
| TC0400004094.mm.1 | 4,64 Rnf207                 | JUC0400017802.mm.1 | -6,57 | 0,017584 | 0,464264                     |      |
| TC0400004094.mm.1 | 4,64 Rnf207                 | JUC0400017785.mm.1 | -6,64 | 0,003379 | 0,354303                     |      |
| TC0400004094.mm.1 | 4,64 Rnf207                 | JUC0400017804.mm.1 | -9,59 | 0,003246 | 0,354243                     |      |
| TC0500001351.mm.1 | -1,08 Oas1h                 | JUC0500006468.mm.1 | 4,44  | 0,027304 | 0,503732                     |      |
| TC0700002042.mm.1 | -1,1 Lrrc56                 | JUC0700009552.mm.1 | 4,44  | 0,008565 | 0,40821                      |      |
| TC0200005472.mm.1 | -1,25 Eng                   | JUC0200002778.mm.1 | 4,43  | 0,000077 | 0,25272                      |      |
| TC0200005472.mm.1 | -1,25 Eng                   | PSR0200005416.mm.1 | 2,56  | 0,011423 | 0,427656 Alternative 5' Donc | 0,22 |
| TC0200005472.mm.1 | -1,25 Eng                   | JUC0200002765.mm.1 | -2,1  | 0,004113 | 0,3623                       |      |
| TC1800000047.mm.1 | 1,13 Rab18                  | JUC1800000170.mm.1 | 4,43  | 0,034337 | 0,525546                     |      |
| TC1800000620.mm.1 | 1,2 Camk2a                  | JUC1800002474.mm.1 | 4,42  | 0,027447 | 0,504045                     |      |
| TC1800000620.mm.1 | 1,2 Camk2a                  | PSR1800004454.mm.1 | 2,21  | 0,006727 | 0,393343 Cassette Exon       | 0,19 |
| TC1800000620.mm.1 | 1,2 Camk2a                  | JUC1800002479.mm.1 | 2,19  | 0,007981 | 0,403853                     |      |
| TC1800000620.mm.1 | 1,2 Camk2a                  | PSR1800004459.mm.1 | -2,03 | 0,029671 | 0,510913 Alternative 3' Acce | 0,12 |
| TC1000001947.mm.1 | 1,22 Ncoa7                  | JUC1000007645.mm.1 | 4,42  | 0,000122 | 0,270905                     |      |
| TC0900000452.mm.1 | 1,66 Scn3b                  | JUC0900001528.mm.1 | 4,41  | 0,001586 | 0,331726                     |      |
| TC0900000452.mm.1 | 1,66 Scn3b                  | PSR0900002967.mm.1 | 3,41  | 0,000075 | 0,251428                     |      |
| TC0900000452.mm.1 | 1,66 Scn3b                  | PSR0900002965.mm.1 | -2,01 | 0,001674 | 0,335182 Alternative 5' Donc | 0,14 |
| TC0900000452.mm.1 | 1,66 Scn3b                  | PSR0900002956.mm.1 | -2,14 | 0,016524 | 0,459611 Alternative 3' Acce | 0,2  |
| TC0900000452.mm.1 | 1,66 Scn3b                  | PSR0900002954.mm.1 | -2,36 | 0,009861 | 0,417945 Alternative 3' Acce | 0,2  |
| TC0900000452.mm.1 | 1,66 Scn3b                  | PSR0900002957.mm.1 | -2,51 | 0,014267 | 0,447979 Intron Retention    | 0,23 |
| TC0900000452.mm.1 | 1,66 Scn3b                  | JUC0900001533.mm.1 | -3,06 | 0,020074 | 0,476576                     |      |
| TC1700000745.mm.1 | -1,23 Trim26                | JUC1700004084.mm.1 | 4,41  | 0,048242 | 0,560272                     |      |
| TC1700000745.mm.1 | -1,23 Trim26                | JUC1700004097.mm.1 | 2,2   | 0,008253 | 0,405976                     |      |
| TC0X00002808.mm.1 | 1,49 Gm14824                | PSR0X00017796.mm.1 | 4,4   | 0,002182 | 0,344453 Alternative 5' Donc | 0,41 |
| TC0X00002808.mm.1 | 1,49 Gm14824                | PSR0X00017795.mm.1 | 3,17  | 0,014258 | 0,447947 Alternative 5' Donc | 0,41 |
| TC0X00002808.mm.1 | 1,49 Gm14824                | PSR0X00017765.mm.1 | 2,87  | 0,021876 | 0,484675 Cassette Exon       | 0,17 |
| TC0X00002808.mm.1 | 1,49 Gm14824                | PSR0X00017800.mm.1 | 2,68  | 0,002762 | 0,35022 Cassette Exon        | 0,16 |
| TC0X00002808.mm.1 | 1,49 Gm14824                | PSR0X00017793.mm.1 | 2,14  | 0,018633 | 0,469964 Cassette Exon       | 0,09 |
| TC0X00002808.mm.1 | 1,49 Gm14824                | JUC0X00008968.mm.1 | -3,26 | 0,000786 | 0,309905                     |      |
| TC1200001911.mm.1 | 3,49 4930447C04Rik; Six6os1 | PSR1200013119.mm.1 | 4,4   | 0,01447  | 0,449178 Alternative 3' Acce | 0,25 |
| TC1200001911.mm.1 | 3,49 4930447C04Rik; Six6os1 | PSR1200013112.mm.1 | 3,22  | 0,048753 | 0,561437 Cassette Exon       | 0,25 |
| TC1200001911.mm.1 | 3,49 4930447C04Rik; Six6os1 | JUC1200007279.mm.1 | 3,06  | 0,012042 | 0,432309                     |      |
| TC1200001911.mm.1 | 3,49 4930447C04Rik; Six6os1 | PSR1200013141.mm.1 | -2,02 | 0,034538 | 0,525975 Cassette Exon       | 0,17 |
| TC1200001911.mm.1 | 3,49 4930447C04Rik; Six6os1 | PSR1200013153.mm.1 | -2,22 | 0,009475 | 0,416549 Cassette Exon       | 0,2  |
| TC1200001911.mm.1 | 3,49 4930447C04Rik; Six6os1 | PSR1200013154.mm.1 | -2,43 | 0,010306 | 0,420505 Cassette Exon       | 0,2  |
| TC1200001911.mm.1 | 3,49 4930447C04Rik; Six6os1 | PSR1200013130.mm.1 | -2,61 | 0,019203 | 0,472951 Alternative 5' Donc | 0,36 |
| TC1200001911.mm.1 | 3,49 4930447C04Rik; Six6os1 | PSR1200013151.mm.1 | -2,62 | 0,01531  | 0,453551 Cassette Exon       | 0,17 |
| TC1200001911.mm.1 | 3,49 4930447C04Rik; Six6os1 | JUC1200007290.mm.1 | -2,7  | 0,027728 | 0,504987                     |      |
| TC1200001911.mm.1 | 3,49 4930447C04Rik; Six6os1 | JUC1200007291.mm.1 | -2,87 | 0,024076 | 0,49304                      |      |
| TC1200001911.mm.1 | 3,49 4930447C04Rik; Six6os1 | JUC1200007304.mm.1 | -3,01 | 0,01418  | 0,447583                     |      |
| TC1200001911.mm.1 | 3,49 4930447C04Rik; Six6os1 | PSR1200013156.mm.1 | -3,02 | 0,002185 | 0,34446 Alternative 5' Donc  | 0,2  |
| TC1200001911.mm.1 | 3,49 4930447C04Rik; Six6os1 | JUC1200007296.mm.1 | -3,15 | 0,016438 | 0,459014                     |      |
| TC1200001911.mm.1 | 3,49 4930447C04Rik; Six6os1 | JUC1200007280.mm.1 | -3,57 | 0,020294 | 0,477245                     |      |
| TC1200001911.mm.1 | 3,49 4930447C04Rik; Six6os1 | JUC1200007294.mm.1 | -3,75 | 0,005659 | 0,381922                     |      |
| TC1200001911.mm.1 | 3,49 4930447C04Rik; Six6os1 | JUC1200007292.mm.1 | -3,91 | 0,005566 | 0,380926                     |      |
| TC1200001911.mm.1 | 3,49 4930447C04Rik; Six6os1 | PSR1200013144.mm.1 | -4,18 | 0,004167 | 0,3623 Cassette Exon         | 0,31 |
| TC1200001911.mm.1 | 3,49 4930447C04Rik; Six6os1 | PSR1200013146.mm.1 | -4,28 | 0,042473 | 0,547627 Alternative 3' Acce | 0,39 |
| TC1200001911.mm.1 | 3,49 4930447C04Rik; Six6os1 | JUC1200007283.mm.1 | -4,65 | 0,012925 | 0,438459                     |      |

|                   |       |                         |                    |        |          |          |                     |      |
|-------------------|-------|-------------------------|--------------------|--------|----------|----------|---------------------|------|
| TC1200001911.mm.1 | 3,49  | 4930447C04Rik; Six6os1  | PSR1200013150.mm.1 | -5,19  | 0,000908 | 0,313363 | Cassette Exon       | 0,32 |
| TC1200001911.mm.1 | 3,49  | 4930447C04Rik; Six6os1  | JUC1200007285.mm.1 | -7,19  | 0,001479 | 0,329081 |                     |      |
| TC1200001911.mm.1 | 3,49  | 4930447C04Rik; Six6os1  | JUC1200007305.mm.1 | -10,03 | 0,004786 | 0,371288 |                     |      |
| TC0400000497.mm.1 | -1,04 | E230008N13Rik           | JUC0400001758.mm.1 | 4,4    | 0,018912 | 0,47128  |                     |      |
| TC0400000497.mm.1 | -1,04 | E230008N13Rik           | JUC0400001766.mm.1 | 3,57   | 0,011487 | 0,428148 |                     |      |
| TC0400000497.mm.1 | -1,04 | E230008N13Rik           | PSR0400003573.mm.1 | 3,4    | 0,011689 | 0,429969 | Cassette Exon       | 0,24 |
| TC0400000497.mm.1 | -1,04 | E230008N13Rik           | JUC0400001760.mm.1 | 3,29   | 0,038132 | 0,535709 |                     |      |
| TC0400000497.mm.1 | -1,04 | E230008N13Rik           | PSR0400003570.mm.1 | 2,91   | 0,0169   | 0,460797 | Cassette Exon       | 0,29 |
| TC0400000497.mm.1 | -1,04 | E230008N13Rik           | PSR0400003574.mm.1 | 2,29   | 0,028607 | 0,507714 | Cassette Exon       | 0,13 |
| TC0400000497.mm.1 | -1,04 | E230008N13Rik           | PSR0400003571.mm.1 | 2,21   | 0,028483 | 0,50733  | Cassette Exon       | 0,22 |
| TC0400000497.mm.1 | -1,04 | E230008N13Rik           | PSR0400003577.mm.1 | 2,11   | 0,014192 | 0,447608 | Cassette Exon       | 0,11 |
| TC1600000387.mm.1 | 1,29  | Opa1                    | JUC1600001934.mm.1 | 4,4    | 0,019699 | 0,474887 |                     |      |
| TC1600000387.mm.1 | 1,29  | Opa1                    | PSR1600003668.mm.1 | -2,06  | 0,017586 | 0,464264 | Alternative 3' Acce | 0,12 |
| TC1600000387.mm.1 | 1,29  | Opa1                    | JUC1600001920.mm.1 | -2,12  | 0,013288 | 0,441719 |                     |      |
| TC0200004970.mm.1 | 1,04  | Edem2                   | JUC0200021802.mm.1 | 4,4    | 0,004391 | 0,366156 |                     |      |
| TC1700001844.mm.1 | -1,28 | Rasal3                  | JUC1700009225.mm.1 | 4,4    | 0,009501 | 0,416578 |                     |      |
| TC0200002381.mm.1 | 1,02  | Ergic3                  | JUC0200009679.mm.1 | 4,39   | 0,030545 | 0,51337  |                     |      |
| TC0200002381.mm.1 | 1,02  | Ergic3                  | JUC0200009678.mm.1 | 4,19   | 0,045952 | 0,555359 |                     |      |
| TC0200002381.mm.1 | 1,02  | Ergic3                  | JUC0200009683.mm.1 | 2,67   | 0,030904 | 0,514574 |                     |      |
| TC1100001149.mm.1 | -1,49 | Rab34                   | JUC1100005533.mm.1 | 4,39   | 0,001273 | 0,322251 |                     |      |
| TC1100001149.mm.1 | -1,49 | Rab34                   | JUC1100005534.mm.1 | 2,47   | 0,035967 | 0,529457 |                     |      |
| TC0X00001306.mm.1 | 1,11  | Gprasp1; Armcx5; Mir764 | PSR0X00008194.mm.1 | 4,38   | 0,005701 | 0,382524 | Cassette Exon       | 0,35 |
| TC0X00001306.mm.1 | 1,11  | Gprasp1; Armcx5; Mir764 | PSR0X00008193.mm.1 | 4,1    | 0,023344 | 0,490143 | Cassette Exon       | 0,3  |
| TC0X00001306.mm.1 | 1,11  | Gprasp1; Armcx5; Mir764 | PSR0X00008198.mm.1 | 2,79   | 0,017863 | 0,466232 | Cassette Exon       | 0,11 |
| TC0X00001306.mm.1 | 1,11  | Gprasp1; Armcx5; Mir764 | PSR0X00008196.mm.1 | 2,61   | 0,020208 | 0,477145 | Cassette Exon       | 0,26 |
| TC0X00001306.mm.1 | 1,11  | Gprasp1; Armcx5; Mir764 | PSR0X00008195.mm.1 | 2,42   | 0,012263 | 0,433955 | Cassette Exon       | 0,27 |
| TC0X00001306.mm.1 | 1,11  | Gprasp1; Armcx5; Mir764 | PSR0X00008192.mm.1 | 2,4    | 0,038737 | 0,537362 | Cassette Exon       | 0,25 |
| TC0X00001306.mm.1 | 1,11  | Gprasp1; Armcx5; Mir764 | JUC0X00004025.mm.1 | 2,08   | 0,017429 | 0,463827 |                     |      |
| TC0X00001306.mm.1 | 1,11  | Gprasp1; Armcx5; Mir764 | PSR0X00008157.mm.1 | 2,01   | 0,020713 | 0,479166 | Alternative 3' Acce | 0,14 |
| TC1000000255.mm.1 | -3,86 |                         | PSR1000001786.mm.1 | 4,38   | 0,001283 | 0,322295 | Alternative 3' Acce | 0,16 |
| TC1900000333.mm.1 | -1,93 | E030003E18Rik           | JUC1900001710.mm.1 | 4,38   | 0,007692 | 0,402552 |                     |      |
| TC1900000333.mm.1 | -1,93 | E030003E18Rik           | PSR1900003332.mm.1 | 2,54   | 0,018659 | 0,470148 | Cassette Exon       | 0,04 |
| TC0200005072.mm.1 | -1,08 | Ptppt                   | JUC0200022351.mm.1 | 4,38   | 0,011824 | 0,430456 |                     |      |
| TC0200005072.mm.1 | -1,08 | Ptppt                   | JUC0200022357.mm.1 | 2,5    | 0,049563 | 0,563325 |                     |      |
| TC0300003187.mm.1 | -1,05 | 4930570G19Rik           | PSR0300024995.mm.1 | 4,37   | 0,001882 | 0,338712 | Alternative 3' Acce | 0,52 |
| TC0300003187.mm.1 | -1,05 | 4930570G19Rik           | PSR0300024996.mm.1 | 3,44   | 0,006714 | 0,393343 | Alternative 3' Acce | 0,52 |
| TC0300003187.mm.1 | -1,05 | 4930570G19Rik           | PSR0300024999.mm.1 | 2,7    | 0,039653 | 0,540212 | Alternative 3' Acce | 0,27 |
| TC0300003187.mm.1 | -1,05 | 4930570G19Rik           | PSR0300024993.mm.1 | 2,43   | 0,002546 | 0,349501 | Alternative 3' Acce | 0,31 |
| TC0300003187.mm.1 | -1,05 | 4930570G19Rik           | JUC0300013109.mm.1 | -2,52  | 0,022877 | 0,488524 |                     |      |
| TC0300003187.mm.1 | -1,05 | 4930570G19Rik           | JUC0300013105.mm.1 | -2,76  | 0,019127 | 0,472431 |                     |      |
| TC0300003187.mm.1 | -1,05 | 4930570G19Rik           | JUC0300013108.mm.1 | -3     | 0,01006  | 0,418902 |                     |      |
| TC1500002033.mm.1 | 4,07  | Mlc1                    | PSR1500016127.mm.1 | 4,37   | 0,019991 | 0,476227 | Cassette Exon       | 0,28 |
| TC1500002033.mm.1 | 4,07  | Mlc1                    | PSR1500016126.mm.1 | 3,79   | 0,046402 | 0,556478 | Cassette Exon       | 0,18 |
| TC1500002033.mm.1 | 4,07  | Mlc1                    | JUC1500009157.mm.1 | 3,01   | 0,017401 | 0,463753 |                     |      |
| TC1500002033.mm.1 | 4,07  | Mlc1                    | PSR1500016130.mm.1 | 2,3    | 0,017732 | 0,465216 | Cassette Exon       | 0,26 |
| TC1500002033.mm.1 | 4,07  | Mlc1                    | JUC1500009158.mm.1 | 2,07   | 0,040651 | 0,542648 |                     |      |
| TC1500002033.mm.1 | 4,07  | Mlc1                    | PSR1500016128.mm.1 | 2,06   | 0,00798  | 0,403853 | Cassette Exon       | 0,03 |
| TC1500002033.mm.1 | 4,07  | Mlc1                    | PSR1500016135.mm.1 | -2,37  | 0,033571 | 0,523171 | Cassette Exon       | 0,2  |

|                   |                    |                    |       |          |          |                          |
|-------------------|--------------------|--------------------|-------|----------|----------|--------------------------|
| TC1500002033.mm.1 | 4,07 Mlc1          | JUC1500009153.mm.1 | -2,64 | 0,021146 | 0,480814 |                          |
| TC1500002033.mm.1 | 4,07 Mlc1          | JUC1500009156.mm.1 | -2,74 | 0,000742 | 0,307808 |                          |
| TC1500002033.mm.1 | 4,07 Mlc1          | PSR1500016133.mm.1 | -2,91 | 0,03776  | 0,534682 | Cassette Exon 0,26       |
| TC0200000445.mm.1 | 1,61 Gpsm1         | JUC0200001324.mm.1 | 4,37  | 0,042826 | 0,548097 |                          |
| TC0200000445.mm.1 | 1,61 Gpsm1         | JUC0200001320.mm.1 | 3,38  | 0,012147 | 0,432868 |                          |
| TC0200000445.mm.1 | 1,61 Gpsm1         | PSR0200002808.mm.1 | -2,02 | 0,005763 | 0,383104 | Cassette Exon 0,1        |
| TC0200000445.mm.1 | 1,61 Gpsm1         | JUC0200001330.mm.1 | -2,22 | 0,007415 | 0,399901 |                          |
| TC0200000445.mm.1 | 1,61 Gpsm1         | PSR0200002798.mm.1 | -2,23 | 0,001252 | 0,322251 | Alternative 3' Acce 0,17 |
| TC0100000524.mm.1 | 1,74 Adam23        | JUC0100002471.mm.1 | 4,37  | 0,003251 | 0,354243 |                          |
| TC0100000524.mm.1 | 1,74 Adam23        | PSR0100004248.mm.1 | -2,04 | 0,023231 | 0,490032 | Cassette Exon 0,09       |
| TC0100000524.mm.1 | 1,74 Adam23        | JUC0100002472.mm.1 | -2,38 | 0,009566 | 0,416927 |                          |
| TC0700002762.mm.1 | -1,05 Gapdhs       | JUC0700013089.mm.1 | 4,37  | 0,009676 | 0,417605 |                          |
| TC0700002762.mm.1 | -1,05 Gapdhs       | JUC0700013090.mm.1 | 2,75  | 0,015347 | 0,453763 |                          |
| TC1100003664.mm.1 | -1,37 Cacnb1       | JUC1100017660.mm.1 | 4,37  | 0,005489 | 0,379939 |                          |
| TC0300002648.mm.1 | 1,33 Lrig2         | JUC0300010743.mm.1 | 4,37  | 0,003703 | 0,357266 |                          |
| TC0300002648.mm.1 | 1,33 Lrig2         | JUC0300010740.mm.1 | 2,97  | 0,02793  | 0,505612 |                          |
| TC1400000141.mm.1 | 1,13 Nkiras1       | JUC1400000715.mm.1 | 4,36  | 0,01619  | 0,45809  |                          |
| TC1700002793.mm.1 | 1,07 Frs3          | JUC1700004736.mm.1 | 4,36  | 0,012359 | 0,434689 |                          |
| TC0500002744.mm.1 | -1,09 Cdkl2        | JUC0500013172.mm.1 | 4,36  | 0,008775 | 0,40982  |                          |
| TC1000002161.mm.1 | -1,42              | JUC1000008232.mm.1 | 4,36  | 0,008835 | 0,410293 |                          |
| TC0900000573.mm.1 | 1,53 Cadm1         | JUC0900002103.mm.1 | 4,35  | 0,001255 | 0,322251 |                          |
| TC0900000573.mm.1 | 1,53 Cadm1         | JUC0900002097.mm.1 | 2,75  | 0,028708 | 0,508054 |                          |
| TC0900000573.mm.1 | 1,53 Cadm1         | PSR0900004055.mm.1 | 2,19  | 0,004356 | 0,365487 | Cassette Exon 0,23       |
| TC0900000573.mm.1 | 1,53 Cadm1         | PSR0900004054.mm.1 | -2,3  | 0,004543 | 0,368648 | Alternative 3' Acce 0,21 |
| TC1400001149.mm.1 | -1,67              | JUC1400004844.mm.1 | 4,35  | 0,028779 | 0,508148 |                          |
| TC1600000288.mm.1 | 1,01 Eif4g1        | JUC1600001465.mm.1 | 4,35  | 0,026815 | 0,502373 |                          |
| TC0700003364.mm.1 | 1,19 B230209E15Rik | PSR0700028828.mm.1 | 4,34  | 0,026043 | 0,49952  | Alternative 3' Acce 0,48 |
| TC0700003364.mm.1 | 1,19 B230209E15Rik | PSR0700028838.mm.1 | -2,03 | 0,033789 | 0,523781 | Intron Retention 0,21    |
| TC0700003364.mm.1 | 1,19 B230209E15Rik | JUC0700015254.mm.1 | -2,39 | 0,022323 | 0,486244 |                          |
| TC1300002605.mm.1 | -1,09 Fam159b      | PSR1300017746.mm.1 | 4,34  | 0,019105 | 0,472235 | Cassette Exon 0,41       |
| TC1300002605.mm.1 | -1,09 Fam159b      | JUC1300009490.mm.1 | 4,22  | 0,001445 | 0,328204 |                          |
| TC1500001785.mm.1 | -1,37 Cyhr1        | PSR1500013835.mm.1 | 4,34  | 0,017036 | 0,461729 | Alternative 5' Donc 0,38 |
| TC1500001785.mm.1 | -1,37 Cyhr1        | JUC1500007908.mm.1 | 2,61  | 0,029402 | 0,509995 |                          |
| TC0200005115.mm.1 | -1,26 Gm14302      | PSR0200043623.mm.1 | 4,34  | 0,020492 | 0,478019 | Cassette Exon 0,28       |
| TC1400001741.mm.1 | -1,24 Ccser2       | JUC1400007409.mm.1 | 4,34  | 0,019167 | 0,472737 |                          |
| TC1400001741.mm.1 | -1,24 Ccser2       | JUC1400007412.mm.1 | -2,19 | 0,047171 | 0,558015 |                          |
| TC1100001256.mm.1 | 1,19 Ccl4          | PSR1100011820.mm.1 | 4,33  | 0,004766 | 0,371039 | Alternative 5' Donc 0,48 |
| TC0800001964.mm.1 | 1,55 Unc5d         | JUC0800008514.mm.1 | 4,33  | 0,019659 | 0,474887 |                          |
| TC0800001964.mm.1 | 1,55 Unc5d         | JUC0800008505.mm.1 | 3,23  | 0,047225 | 0,55815  |                          |
| TC0800001964.mm.1 | 1,55 Unc5d         | JUC0800008508.mm.1 | -2,43 | 0,000092 | 0,255472 |                          |
| TC0500001428.mm.1 | -1,22 Kntc1        | JUC0500006936.mm.1 | 4,33  | 0,004644 | 0,370181 |                          |
| TC0400003219.mm.1 | -1,27 Dio1         | JUC0400013350.mm.1 | 4,33  | 0,002281 | 0,34605  |                          |
| TC0500000186.mm.1 | -1,1 6030443J06Rik | PSR0500001362.mm.1 | 4,32  | 0,003497 | 0,355638 | Cassette Exon 0,27       |
| TC1700001974.mm.1 | -1,1 Vars2         | JUC1700010012.mm.1 | 4,32  | 0,013717 | 0,444758 |                          |
| TC1700001974.mm.1 | -1,1 Vars2         | JUC1700010023.mm.1 | 2,74  | 0,036541 | 0,531355 |                          |
| TC1700001974.mm.1 | -1,1 Vars2         | PSR1700018742.mm.1 | 2,06  | 0,026509 | 0,501346 | Cassette Exon 0,11       |
| TC1000000514.mm.1 | -1,25 Lims1        | JUC1000001883.mm.1 | 4,32  | 0,044819 | 0,552553 |                          |
| TC0900002783.mm.1 | 3,94 Snap91        | JUC0900012915.mm.1 | 4,31  | 0,004242 | 0,363295 |                          |



|                   |                     |                     |        |          |                              |      |
|-------------------|---------------------|---------------------|--------|----------|------------------------------|------|
| TC0900002783.mm.1 | 3,94 Snap91         | JUC0900012896.mm.1  | 3,09   | 0,023798 | 0,491893                     |      |
| TC0900002783.mm.1 | 3,94 Snap91         | PSR0900023071.mm.1  | 3,06   | 0,00648  | 0,390542 Cassette Exon       | 0,24 |
| TC0900002783.mm.1 | 3,94 Snap91         | PSR0900023072.mm.1  | 2,73   | 0,003108 | 0,353892 Cassette Exon       | 0,33 |
| TC0900002783.mm.1 | 3,94 Snap91         | PSR0900023073.mm.1  | 2,7    | 0,018765 | 0,470767 Cassette Exon       | 0,31 |
| TC0900002783.mm.1 | 3,94 Snap91         | JUC0900012899.mm.1  | 2,58   | 0,031314 | 0,516204                     |      |
| TC0900002783.mm.1 | 3,94 Snap91         | PSR0900023070.mm.1  | 2,55   | 0,021609 | 0,483425 Cassette Exon       | 0,2  |
| TC0900002783.mm.1 | 3,94 Snap91         | JUC0900012911.mm.1  | 2,47   | 0,041439 | 0,544646                     |      |
| TC0900002783.mm.1 | 3,94 Snap91         | PSR0900023074.mm.1  | 2,34   | 0,004167 | 0,3623 Cassette Exon         | 0,14 |
| TC0900002783.mm.1 | 3,94 Snap91         | PSR0900023066.mm.1  | -2,4   | 0,009015 | 0,412516 Alternative 3' Acce | 0,45 |
| TC0900002783.mm.1 | 3,94 Snap91         | JUC0900012892.mm.1  | -2,73  | 0,005795 | 0,383104                     |      |
| TC0900002783.mm.1 | 3,94 Snap91         | PSR0900023051.mm.1  | -2,9   | 0,007753 | 0,402774 Cassette Exon       | 0,01 |
| TC0900002783.mm.1 | 3,94 Snap91         | PSR0900023054.mm.1  | -3,01  | 0,002578 | 0,349501 Cassette Exon       | 0,15 |
| TC0900002783.mm.1 | 3,94 Snap91         | PSR0900023040.mm.1  | -3,11  | 0,000063 | 0,250119 Cassette Exon       | 0,2  |
| TC0900002783.mm.1 | 3,94 Snap91         | PSR0900023056.mm.1  | -3,34  | 0,001809 | 0,336544 Alternative 5' Donc | 0,41 |
| TC0900002783.mm.1 | 3,94 Snap91         | PSR0900023067.mm.1  | -3,73  | 0,006072 | 0,386691 Alternative 3' Acce | 0,45 |
| TC0900002783.mm.1 | 3,94 Snap91         | JUC0900012901.mm.1  | -4,06  | 0,000725 | 0,306408                     |      |
| TC0900002783.mm.1 | 3,94 Snap91         | PSR0900023077.mm.1  | -4,22  | 0,006707 | 0,393343 Cassette Exon       | 0,19 |
| TC0900002783.mm.1 | 3,94 Snap91         | PSR0900023082.mm.1  | -4,44  | 0,002495 | 0,349135 Cassette Exon       | 0,41 |
| TC0900002783.mm.1 | 3,94 Snap91         | JUC0900012924.mm.1  | -4,86  | 0,041446 | 0,544646                     |      |
| TC0900002783.mm.1 | 3,94 Snap91         | PSR0900023068.mm.1  | -5,25  | 0,002974 | 0,352501 Alternative 3' Acce | 0,45 |
| TC0900002783.mm.1 | 3,94 Snap91         | JUC0900012918.mm.1  | -6,42  | 0,031622 | 0,517405                     |      |
| TC0900002783.mm.1 | 3,94 Snap91         | JUC0900012929.mm.1  | -6,6   | 0,003867 | 0,358861                     |      |
| TC0900002783.mm.1 | 3,94 Snap91         | PSR0900023076.mm.1  | -6,68  | 0,001805 | 0,336311 Cassette Exon       | 0,19 |
| TC0900002783.mm.1 | 3,94 Snap91         | JUC0900012928.mm.1  | -6,78  | 0,013501 | 0,443238                     |      |
| TC0900002783.mm.1 | 3,94 Snap91         | PSR0900023080.mm.1  | -7,32  | 0,014247 | 0,447947 Cassette Exon       | 0,19 |
| TC0900002783.mm.1 | 3,94 Snap91         | JUC0900012921.mm.1  | -8,05  | 0,016031 | 0,45719                      |      |
| TC0900002783.mm.1 | 3,94 Snap91         | JUC0900012927.mm.1  | -8,53  | 0,022867 | 0,488492                     |      |
| TC0900002783.mm.1 | 3,94 Snap91         | JUC0900012932.mm.1  | -9,41  | 0,002017 | 0,34123                      |      |
| TC0900002783.mm.1 | 3,94 Snap91         | JUC0900012934.mm.1  | -14,72 | 0,000343 | 0,289576                     |      |
| TC0900002783.mm.1 | 3,94 Snap91         | JUC0900012933.mm.1  | -19,34 | 0,012857 | 0,437778                     |      |
| TC0900002783.mm.1 | 3,94 Snap91         | JUC0900012935.mm.1  | -23,35 | 0,006876 | 0,394271                     |      |
| TC1500000133.mm.1 | 1,93                | PSR1500001136.mm.1  | 4,31   | 0,00126  | 0,322251 Cassette Exon       | 0,34 |
| TC1500000133.mm.1 | 1,93                | JUC1500000670.mm.1  | 2,42   | 0,013039 | 0,439418                     |      |
| TC0100002572.mm.1 | -1,37 6030407003Rik | JUC01000011724.mm.1 | 4,31   | 0,003212 | 0,354243                     |      |
| TC1900001361.mm.1 | 1,22 Prkg1          | JUC1900006602.mm.1  | 4,31   | 0,035926 | 0,529399                     |      |
| TC0400001064.mm.1 | 1,14 Mier1          | JUC0400003728.mm.1  | 4,31   | 0,027016 | 0,502979                     |      |
| TC0400001064.mm.1 | 1,14 Mier1          | PSR0400007281.mm.1  | 2,03   | 0,02861  | 0,507714                     |      |
| TC0400001064.mm.1 | 1,14 Mier1          | JUC0400003731.mm.1  | -3,16  | 0,03638  | 0,530811                     |      |
| TC1600001810.mm.1 | 1,36 Epha6          | JUC1600007547.mm.1  | 4,3    | 0,001804 | 0,336311                     |      |
| TC1600001810.mm.1 | 1,36 Epha6          | PSR1600014553.mm.1  | 2,45   | 0,046507 | 0,556739 Cassette Exon       | 0,28 |
| TC1600001810.mm.1 | 1,36 Epha6          | PSR1600014556.mm.1  | -2,03  | 0,003697 | 0,357266                     |      |
| TC1600001810.mm.1 | 1,36 Epha6          | JUC1600007562.mm.1  | -2,6   | 0,008625 | 0,408463                     |      |
| TC1600001810.mm.1 | 1,36 Epha6          | JUC1600007563.mm.1  | -2,97  | 0,014556 | 0,449658                     |      |
| TC1600001810.mm.1 | 1,36 Epha6          | JUC1600007550.mm.1  | -3,52  | 0,009094 | 0,412827                     |      |
| TC0600001462.mm.1 | -1,24 Vwf           | JUC0600006338.mm.1  | 4,3    | 0,009673 | 0,417579                     |      |
| TC0X00000677.mm.1 | -1,3 Xlr4b          | JUC0X00002174.mm.1  | 4,3    | 0,008293 | 0,406087                     |      |
| TC1600002145.mm.1 | 1,78 Dscam          | PSR1600016559.mm.1  | 4,29   | 0,007772 | 0,402826 Cassette Exon       | 0,32 |
| TC1600002145.mm.1 | 1,78 Dscam          | JUC1600008552.mm.1  | 3,77   | 0,000303 | 0,288663                     |      |

|                   |                        |                    |       |          |          |                     |      |
|-------------------|------------------------|--------------------|-------|----------|----------|---------------------|------|
| TC1600002145.mm.1 | 1,78 Dscam             | JUC1600008570.mm.1 | 3,62  | 0,000682 | 0,304417 |                     |      |
| TC1600002145.mm.1 | 1,78 Dscam             | JUC1600008568.mm.1 | 2,38  | 0,010421 | 0,42148  |                     |      |
| TC1600002145.mm.1 | 1,78 Dscam             | JUC1600008559.mm.1 | 2,36  | 0,009706 | 0,417765 |                     |      |
| TC1600002145.mm.1 | 1,78 Dscam             | PSR1600016560.mm.1 | 2,32  | 0,013153 | 0,440265 | Cassette Exon       | 0,13 |
| TC1600002145.mm.1 | 1,78 Dscam             | JUC1600008576.mm.1 | 2,15  | 0,043368 | 0,549472 |                     |      |
| TC1600002145.mm.1 | 1,78 Dscam             | JUC1600008574.mm.1 | -2,01 | 0,000601 | 0,304044 |                     |      |
| TC1600002145.mm.1 | 1,78 Dscam             | PSR1600016586.mm.1 | -2,26 | 0,01683  | 0,460665 | Cassette Exon       | 0,06 |
| TC1600002145.mm.1 | 1,78 Dscam             | JUC1600008572.mm.1 | -2,44 | 0,003118 | 0,353892 |                     |      |
| TC1600002145.mm.1 | 1,78 Dscam             | JUC1600008573.mm.1 | -3,76 | 0,039422 | 0,539611 |                     |      |
| TC0400004164.mm.1 | -1,36 Gm10560; Gm16008 | PSR0400034986.mm.1 | 4,29  | 0,043705 | 0,550256 |                     |      |
| TC0400004164.mm.1 | -1,36 Gm10560; Gm16008 | PSR0400034973.mm.1 | 3,8   | 0,002349 | 0,34761  | Alternative 3' Acce | 0,16 |
| TC0400004164.mm.1 | -1,36 Gm10560; Gm16008 | PSR0400034989.mm.1 | 2,3   | 0,030405 | 0,513027 | Alternative 5' Donc | 0,08 |
| TC0400004164.mm.1 | -1,36 Gm10560; Gm16008 | PSR0400034972.mm.1 | 2,19  | 0,01958  | 0,474672 | Alternative 3' Acce | 0,16 |
| TC0400004164.mm.1 | -1,36 Gm10560; Gm16008 | PSR0400034983.mm.1 | 2,17  | 0,031315 | 0,516204 |                     |      |
| TC1300001263.mm.1 | 1,78 Ankrd55           | PSR1300007956.mm.1 | 4,28  | 0,000928 | 0,313363 | Cassette Exon       | 0,37 |
| TC1300001263.mm.1 | 1,78 Ankrd55           | JUC1300004131.mm.1 | 3,04  | 0,014409 | 0,448751 |                     |      |
| TC1300001263.mm.1 | 1,78 Ankrd55           | JUC1300004132.mm.1 | 2,43  | 0,049064 | 0,56202  |                     |      |
| TC1300001263.mm.1 | 1,78 Ankrd55           | PSR1300007962.mm.1 | -2,79 | 0,004217 | 0,363236 | Cassette Exon       | 0,17 |
| TC1300001263.mm.1 | 1,78 Ankrd55           | PSR1300007953.mm.1 | -3,22 | 0,003791 | 0,357817 | Cassette Exon       | 0,21 |
| TC0900001487.mm.1 | 2,36 Trank1            | JUC0900006977.mm.1 | 4,28  | 0,000416 | 0,297771 |                     |      |
| TC0900001487.mm.1 | 2,36 Trank1            | PSR0900012476.mm.1 | 2,97  | 0,006045 | 0,386586 | Cassette Exon       | 0,33 |
| TC0900001487.mm.1 | 2,36 Trank1            | PSR0900012481.mm.1 | 2,74  | 0,012805 | 0,437316 | Mutually Exclusive  | 0,25 |
| TC0900001487.mm.1 | 2,36 Trank1            | PSR0900012497.mm.1 | -2,33 | 0,032425 | 0,519384 | Cassette Exon       | 0,25 |
| TC0900001487.mm.1 | 2,36 Trank1            | PSR0900012482.mm.1 | -2,59 | 0,04537  | 0,55404  | Mutually Exclusive  | 0,25 |
| TC0900001487.mm.1 | 2,36 Trank1            | JUC0900006996.mm.1 | -3,9  | 0,007996 | 0,403853 |                     |      |
| TC0800001900.mm.1 | 1,67 Adam32            | JUC0800008254.mm.1 | 4,28  | 0,007302 | 0,398847 |                     |      |
| TC0800001900.mm.1 | 1,67 Adam32            | PSR0800015103.mm.1 | -2,1  | 0,031676 | 0,517405 | Cassette Exon       | 0,19 |
| TC0800001900.mm.1 | 1,67 Adam32            | PSR0800015107.mm.1 | -2,45 | 0,006912 | 0,394898 | Alternative 5' Donc | 0,3  |
| TC0800001900.mm.1 | 1,67 Adam32            | JUC0800008241.mm.1 | -2,53 | 0,012274 | 0,434165 |                     |      |
| TC0800001900.mm.1 | 1,67 Adam32            | JUC0800008258.mm.1 | -2,62 | 0,015185 | 0,452699 |                     |      |
| TC0800001900.mm.1 | 1,67 Adam32            | PSR0800015119.mm.1 | -2,95 | 0,039969 | 0,540973 | Alternative 5' Donc | 0,23 |
| TC0800001900.mm.1 | 1,67 Adam32            | JUC0800008247.mm.1 | -3,42 | 0,032213 | 0,518863 |                     |      |
| TC0800001900.mm.1 | 1,67 Adam32            | JUC0800008246.mm.1 | -6,37 | 0,015135 | 0,452699 |                     |      |
| TC1200001077.mm.1 | 1,52 Vrk1              | JUC1200004327.mm.1 | 4,28  | 0,024481 | 0,493992 |                     |      |
| TC1300002224.mm.1 | -1,24                  | JUC1300007495.mm.1 | 4,28  | 0,010779 | 0,423955 |                     |      |
| TC0400000138.mm.1 | 5,18 Calb1             | PSR0400000895.mm.1 | 4,27  | 0,000231 | 0,28803  | Cassette Exon       | 0,41 |
| TC0400000138.mm.1 | 5,18 Calb1             | JUC0400000433.mm.1 | 3,68  | 0,009519 | 0,416602 |                     |      |
| TC0400000138.mm.1 | 5,18 Calb1             | PSR0400000886.mm.1 | 2,04  | 0,023542 | 0,490947 | Cassette Exon       | 0,08 |
| TC0400000138.mm.1 | 5,18 Calb1             | PSR0400000899.mm.1 | -2,46 | 0,007541 | 0,401345 | Alternative 5' Donc | 0,26 |
| TC0400000138.mm.1 | 5,18 Calb1             | PSR0400000900.mm.1 | -3,11 | 0,003555 | 0,356223 | Alternative 5' Donc | 0,26 |
| TC0400000138.mm.1 | 5,18 Calb1             | PSR0400000884.mm.1 | -3,75 | 0,000011 | 0,179072 | Cassette Exon       | 0,25 |
| TC0400000138.mm.1 | 5,18 Calb1             | PSR0400000883.mm.1 | -3,79 | 0,000222 | 0,28803  | Cassette Exon       | 0,26 |
| TC0400000138.mm.1 | 5,18 Calb1             | PSR0400000901.mm.1 | -5,2  | 0,001123 | 0,317328 | Alternative 5' Donc | 0,26 |
| TC0400000138.mm.1 | 5,18 Calb1             | PSR0400000890.mm.1 | -5,21 | 0,006419 | 0,389893 | Alternative 5' Donc | 0,47 |
| TC0400000138.mm.1 | 5,18 Calb1             | PSR0400000888.mm.1 | -7,41 | 0,001782 | 0,336311 | Intron Retention    | 0,74 |
| TC0400000138.mm.1 | 5,18 Calb1             | PSR0400000891.mm.1 | -7,58 | 0,002289 | 0,34605  | Alternative 5' Donc | 0,47 |
| TC0400000138.mm.1 | 5,18 Calb1             | PSR0400000882.mm.1 | -8,02 | 0,001673 | 0,335182 | Cassette Exon       | 0,26 |
| TC1500001825.mm.1 | 3,06 Cacng2            | JUC1500008126.mm.1 | 4,27  | 0,033835 | 0,524006 |                     |      |

|                   |       |         |                    |       |          |          |                     |      |
|-------------------|-------|---------|--------------------|-------|----------|----------|---------------------|------|
| TC1500001825.mm.1 | 3,06  | Cacng2  | JUC1500008128.mm.1 | 3,26  | 0,006082 | 0,386691 |                     |      |
| TC1500001825.mm.1 | 3,06  | Cacng2  | PSR1500014250.mm.1 | 2,86  | 0,005741 | 0,382993 | Cassette Exon       | 0,27 |
| TC1500001825.mm.1 | 3,06  | Cacng2  | PSR1500014245.mm.1 | -2,21 | 0,027088 | 0,503022 |                     |      |
| TC1500001825.mm.1 | 3,06  | Cacng2  | PSR1500014239.mm.1 | -3,72 | 0,009411 | 0,415853 | Alternative 3' Acce | 0,41 |
| TC1400000779.mm.1 | 1,75  | Lrrc16b | JUC1400003249.mm.1 | 4,27  | 0,008679 | 0,408815 |                     |      |
| TC1400000779.mm.1 | 1,75  | Lrrc16b | PSR1400006097.mm.1 | 2,99  | 0,003334 | 0,354243 | Cassette Exon       | 0,23 |
| TC1400000779.mm.1 | 1,75  | Lrrc16b | JUC1400003243.mm.1 | 2,52  | 0,033763 | 0,523686 |                     |      |
| TC1400000779.mm.1 | 1,75  | Lrrc16b | JUC1400003238.mm.1 | 2,3   | 0,006624 | 0,392458 |                     |      |
| TC1400000779.mm.1 | 1,75  | Lrrc16b | PSR1400006130.mm.1 | -2,02 | 0,018445 | 0,468671 | Cassette Exon       | 0,17 |
| TC1400000779.mm.1 | 1,75  | Lrrc16b | JUC1400003274.mm.1 | -2,07 | 0,039449 | 0,539705 |                     |      |
| TC1400000779.mm.1 | 1,75  | Lrrc16b | JUC1400003241.mm.1 | -2,49 | 0,007585 | 0,401712 |                     |      |
| TC1400000779.mm.1 | 1,75  | Lrrc16b | PSR1400006129.mm.1 | -2,6  | 0,002659 | 0,349612 | Cassette Exon       | 0,21 |
| TC1400000779.mm.1 | 1,75  | Lrrc16b | JUC1400003270.mm.1 | -2,72 | 0,017259 | 0,462804 |                     |      |
| TC1400000779.mm.1 | 1,75  | Lrrc16b | JUC1400003266.mm.1 | -3,49 | 0,002008 | 0,341091 |                     |      |
| TC1800000613.mm.1 | -1,79 | Dctn4   | JUC1800002432.mm.1 | 4,27  | 0,005899 | 0,383835 |                     |      |
| TC1800001272.mm.1 | -1,11 | Jakmip2 | JUC1800005281.mm.1 | 4,27  | 0,001051 | 0,316361 |                     |      |
| TC1500000814.mm.1 | -1,08 |         | JUC1500003604.mm.1 | 4,27  | 0,022006 | 0,485226 |                     |      |
| TC0200001030.mm.1 | 1,07  | Dcaf17  | JUC0200004246.mm.1 | 4,27  | 0,047947 | 0,559549 |                     |      |
| TC0200001030.mm.1 | 1,07  | Dcaf17  | JUC0200004251.mm.1 | 2,18  | 0,040667 | 0,542693 |                     |      |
| TC0200001030.mm.1 | 1,07  | Dcaf17  | JUC0200004237.mm.1 | -2,08 | 0,02361  | 0,491012 |                     |      |
| TC0700001118.mm.1 | -1,12 | Acan    | JUC0700005032.mm.1 | 4,26  | 0,02038  | 0,477622 |                     |      |
| TC0X00000929.mm.1 | -1,96 | Ar      | PSR0X00005981.mm.1 | 4,25  | 0,04018  | 0,541655 | Alternative 5' Donc | 0,17 |
| TC0X00000929.mm.1 | -1,96 | Ar      | PSR0X00005973.mm.1 | 3,17  | 0,024368 | 0,49362  | Cassette Exon       | 0,28 |
| TC0X00000929.mm.1 | -1,96 | Ar      | PSR0X00005976.mm.1 | 2,48  | 0,015501 | 0,454456 | Cassette Exon       | 0,14 |
| TC0X00000929.mm.1 | -1,96 | Ar      | PSR0X00005988.mm.1 | 2,46  | 0,000792 | 0,310881 | Alternative 5' Donc | 0,21 |
| TC0X00000929.mm.1 | -1,96 | Ar      | PSR0X00005972.mm.1 | 2,38  | 0,006172 | 0,387873 | Cassette Exon       | 0,19 |
| TC0X00000929.mm.1 | -1,96 | Ar      | PSR0X00005975.mm.1 | 2,34  | 0,009865 | 0,417945 | Cassette Exon       | 0,14 |
| TC0900001261.mm.1 | -1,31 | Stag1   | JUC0900005429.mm.1 | 4,25  | 0,020327 | 0,477245 |                     |      |
| TC0900001261.mm.1 | -1,31 | Stag1   | PSR0900009893.mm.1 | 2,83  | 0,005808 | 0,383104 | Cassette Exon       | 0,27 |
| TC0900001261.mm.1 | -1,31 | Stag1   | JUC0900005419.mm.1 | 2,67  | 0,024    | 0,492783 |                     |      |
| TC0900001261.mm.1 | -1,31 | Stag1   | JUC0900005434.mm.1 | 2,45  | 0,040336 | 0,541859 |                     |      |
| TC0900001261.mm.1 | -1,31 | Stag1   | JUC0900005432.mm.1 | 2,42  | 0,030978 | 0,51471  |                     |      |
| TC0900001261.mm.1 | -1,31 | Stag1   | JUC0900005433.mm.1 | 2,36  | 0,006287 | 0,388916 |                     |      |
| TC0900001261.mm.1 | -1,31 | Stag1   | JUC0900005430.mm.1 | 2,11  | 0,012378 | 0,434939 |                     |      |
| TC1200000624.mm.1 | -1,14 | Pcnxl4  | JUC1200002435.mm.1 | 4,25  | 0,01075  | 0,423812 |                     |      |
| TC1200000624.mm.1 | -1,14 | Pcnxl4  | PSR1200004344.mm.1 | 3,19  | 0,021875 | 0,484675 | Cassette Exon       | 0,25 |
| TC1500001054.mm.1 | 1,6   | Slc4a8  | JUC1500004716.mm.1 | 4,24  | 0,017739 | 0,465238 |                     |      |
| TC1500001054.mm.1 | 1,6   | Slc4a8  | JUC1500004711.mm.1 | 2,5   | 0,01426  | 0,447947 |                     |      |
| TC1500001054.mm.1 | 1,6   | Slc4a8  | PSR1500008359.mm.1 | -2,08 | 0,002742 | 0,349612 | Alternative 3' Acce | 0,18 |
| TC1500001054.mm.1 | 1,6   | Slc4a8  | JUC1500004730.mm.1 | -2,16 | 0,012417 | 0,435195 |                     |      |
| TC1500001054.mm.1 | 1,6   | Slc4a8  | PSR1500008331.mm.1 | -2,99 | 0,006394 | 0,389654 | Intron Retention    | 0,33 |
| TC1500001054.mm.1 | 1,6   | Slc4a8  | JUC1500004727.mm.1 | -3,37 | 0,010103 | 0,418998 |                     |      |
| TC0700001988.mm.1 | 1,46  | Dpysl4  | JUC0700009233.mm.1 | 4,24  | 0,032759 | 0,520598 |                     |      |
| TC0700001988.mm.1 | 1,46  | Dpysl4  | PSR0700017395.mm.1 | 2,04  | 0,039493 | 0,539762 | Cassette Exon       | 0,11 |
| TC0700001988.mm.1 | 1,46  | Dpysl4  | PSR0700017403.mm.1 | -2,55 | 0,003133 | 0,353892 | Alternative 5' Donc | 0,29 |
| TC0700001988.mm.1 | 1,46  | Dpysl4  | JUC0700009229.mm.1 | -3,14 | 0,001982 | 0,341091 |                     |      |
| TC1500002061.mm.1 | 1,6   | Syt10   | JUC1500009464.mm.1 | 4,24  | 0,026435 | 0,501198 |                     |      |
| TC1500002061.mm.1 | 1,6   | Syt10   | JUC1500009463.mm.1 | 2,28  | 0,018161 | 0,467432 |                     |      |

|                   |                             |                    |       |          |          |                          |
|-------------------|-----------------------------|--------------------|-------|----------|----------|--------------------------|
| TC0100002696.mm.1 | 3,44 Dner                   | JUC0100012398.mm.1 | 4,23  | 0,004863 | 0,371692 |                          |
| TC0100002696.mm.1 | 3,44 Dner                   | JUC0100012400.mm.1 | 2,09  | 0,017322 | 0,463351 |                          |
| TC0100002696.mm.1 | 3,44 Dner                   | JUC0100012403.mm.1 | -2,93 | 0,028411 | 0,507154 |                          |
| TC0100002696.mm.1 | 3,44 Dner                   | PSR0100021861.mm.1 | -3,53 | 0,014149 | 0,447466 | Cassette Exon 0,22       |
| TC0100002696.mm.1 | 3,44 Dner                   | PSR0100021856.mm.1 | -4,95 | 0,001237 | 0,322251 | Alternative 3' Acce 0,48 |
| TC1700002384.mm.1 | -1,11 Fbxl17                | JUC1700011915.mm.1 | 4,23  | 0,018064 | 0,46716  |                          |
| TC1100003049.mm.1 | 2,29 Atp1b2                 | PSR1100027867.mm.1 | 4,22  | 0,005602 | 0,381115 | Cassette Exon 0,59       |
| TC1100003049.mm.1 | 2,29 Atp1b2                 | JUC1100014630.mm.1 | 3,4   | 0,012237 | 0,433659 |                          |
| TC1100003049.mm.1 | 2,29 Atp1b2                 | JUC1100014628.mm.1 | 3,39  | 0,012006 | 0,432286 |                          |
| TC1100003049.mm.1 | 2,29 Atp1b2                 | JUC1100014623.mm.1 | -3,47 | 0,002678 | 0,349612 |                          |
| TC0200003027.mm.1 | 1,34 Skida1                 | PSR0200024978.mm.1 | 4,22  | 0,033145 | 0,521912 |                          |
| TC0200003027.mm.1 | 1,34 Skida1                 | PSR0200024975.mm.1 | 4,01  | 0,031555 | 0,517144 | Alternative 5' Donc 0,37 |
| TC0200003027.mm.1 | 1,34 Skida1                 | PSR0200024973.mm.1 | 3,77  | 0,016622 | 0,459979 | Alternative 5' Donc 0,37 |
| TC0200003027.mm.1 | 1,34 Skida1                 | PSR0200024976.mm.1 | 3,31  | 0,022374 | 0,486433 |                          |
| TC0200003027.mm.1 | 1,34 Skida1                 | PSR0200024971.mm.1 | 3,29  | 0,017157 | 0,46232  | Alternative 3' Acce 0,19 |
| TC0500003688.mm.1 | 1,06 N4bp2l2                | PSR0500033693.mm.1 | 4,22  | 0,003049 | 0,353892 | Cassette Exon 0,29       |
| TC0900000052.mm.1 | -1,2 Mmp20                  | JUC0900000236.mm.1 | 4,22  | 0,007852 | 0,403345 |                          |
| TC1100000245.mm.1 | -1,05 Pus10                 | JUC1100001133.mm.1 | 4,22  | 0,036466 | 0,531117 |                          |
| TC1100000245.mm.1 | -1,05 Pus10                 | JUC1100001132.mm.1 | 2,68  | 0,030894 | 0,514574 |                          |
| TC1900000163.mm.1 | 4,68 LOC102308570; 1810009A | PSR1900002184.mm.1 | 4,21  | 0,016744 | 0,460378 | Cassette Exon 0,25       |
| TC1900000163.mm.1 | 4,68 LOC102308570; 1810009A | PSR1900002182.mm.1 | 2,47  | 0,00591  | 0,384002 | Cassette Exon 0,15       |
| TC1900000163.mm.1 | 4,68 LOC102308570; 1810009A | PSR1900002190.mm.1 | -2,08 | 0,008529 | 0,40772  | Alternative 3' Acce 0,35 |
| TC1900000163.mm.1 | 4,68 LOC102308570; 1810009A | JUC1900001098.mm.1 | -2,18 | 0,043163 | 0,548754 |                          |
| TC1900000163.mm.1 | 4,68 LOC102308570; 1810009A | JUC1900001101.mm.1 | -4,57 | 0,010732 | 0,423745 |                          |
| TC1900000163.mm.1 | 4,68 LOC102308570; 1810009A | JUC1900001102.mm.1 | -5,51 | 0,012993 | 0,439254 |                          |
| TC1900000163.mm.1 | 4,68 LOC102308570; 1810009A | PSR1900002189.mm.1 | -5,91 | 0,01572  | 0,455416 | Cassette Exon 0,45       |
| TC1000000734.mm.1 | -4,15 Gm16222               | PSR1000005247.mm.1 | 4,2   | 0,00335  | 0,354243 | Cassette Exon 0,29       |
| TC0900002766.mm.1 | 1,63 Lca5                   | JUC0900012802.mm.1 | 4,19  | 0,021521 | 0,482856 |                          |
| TC0900002766.mm.1 | 1,63 Lca5                   | JUC0900012798.mm.1 | 3,23  | 0,013447 | 0,442693 |                          |
| TC0900002766.mm.1 | 1,63 Lca5                   | PSR0900022885.mm.1 | 3,16  | 0,005697 | 0,382524 | Cassette Exon 0,33       |
| TC0900002766.mm.1 | 1,63 Lca5                   | PSR0900022888.mm.1 | 2,6   | 0,029279 | 0,509874 | Cassette Exon 0,34       |
| TC0900002766.mm.1 | 1,63 Lca5                   | PSR0900022887.mm.1 | 2,49  | 0,001269 | 0,322251 | Cassette Exon 0,34       |
| TC0900002766.mm.1 | 1,63 Lca5                   | JUC0900012803.mm.1 | -2,25 | 0,047222 | 0,558148 |                          |
| TC1500001056.mm.1 | 1,81 Scn8a                  | JUC1500004735.mm.1 | 4,19  | 0,000959 | 0,313363 |                          |
| TC1500001056.mm.1 | 1,81 Scn8a                  | JUC1500004744.mm.1 | 3,57  | 0,001382 | 0,32572  |                          |
| TC1500001056.mm.1 | 1,81 Scn8a                  | JUC1500004736.mm.1 | 2,68  | 0,00985  | 0,417839 |                          |
| TC1500001056.mm.1 | 1,81 Scn8a                  | JUC1500004753.mm.1 | -2,07 | 0,039842 | 0,540922 |                          |
| TC1500001056.mm.1 | 1,81 Scn8a                  | PSR1500008375.mm.1 | -2,16 | 0,007284 | 0,398687 | Cassette Exon 0,31       |
| TC1500001056.mm.1 | 1,81 Scn8a                  | JUC1500004751.mm.1 | -2,3  | 0,027556 | 0,504437 |                          |
| TC1500001056.mm.1 | 1,81 Scn8a                  | PSR1500008371.mm.1 | -2,39 | 0,006946 | 0,395542 | Cassette Exon 0,08       |
| TC1500001056.mm.1 | 1,81 Scn8a                  | JUC1500004754.mm.1 | -2,42 | 0,01255  | 0,435693 |                          |
| TC1500001056.mm.1 | 1,81 Scn8a                  | JUC1500004768.mm.1 | -2,49 | 0,01882  | 0,470836 |                          |
| TC1500001056.mm.1 | 1,81 Scn8a                  | PSR1500008390.mm.1 | -2,57 | 0,014433 | 0,448934 |                          |
| TC1500001056.mm.1 | 1,81 Scn8a                  | JUC1500004761.mm.1 | -2,69 | 0,013598 | 0,443703 |                          |
| TC1500001056.mm.1 | 1,81 Scn8a                  | JUC1500004749.mm.1 | -2,78 | 0,007762 | 0,402774 |                          |
| TC1500001056.mm.1 | 1,81 Scn8a                  | JUC1500004731.mm.1 | -2,9  | 0,041087 | 0,543912 |                          |
| TC1500001056.mm.1 | 1,81 Scn8a                  | JUC1500004767.mm.1 | -3    | 0,015073 | 0,45241  |                          |
| TC0600000027.mm.1 | 1,72 Dync1i1                | JUC0600000184.mm.1 | 4,19  | 0,00242  | 0,34896  |                          |

|                   |                    |                    |        |          |                              |      |
|-------------------|--------------------|--------------------|--------|----------|------------------------------|------|
| TC0600000027.mm.1 | 1,72 Dync1i1       | PSR0600000315.mm.1 | 2,65   | 0,010725 | 0,423745 Cassette Exon       | 0,22 |
| TC0600000027.mm.1 | 1,72 Dync1i1       | PSR0600000310.mm.1 | 2,24   | 0,002409 | 0,348653 Cassette Exon       | 0,08 |
| TC0600000027.mm.1 | 1,72 Dync1i1       | PSR0600000293.mm.1 | -2,16  | 0,008179 | 0,40568 Alternative 3' Acce  | 0,13 |
| TC0600000027.mm.1 | 1,72 Dync1i1       | JUC0600000182.mm.1 | -2,36  | 0,017988 | 0,466929                     |      |
| TC0100003382.mm.1 | 5,39 Dnm3          | JUC0100015848.mm.1 | 4,18   | 0,000713 | 0,306015                     |      |
| TC0100003382.mm.1 | 5,39 Dnm3          | JUC0100015847.mm.1 | 3,71   | 0,033792 | 0,523795                     |      |
| TC0100003382.mm.1 | 5,39 Dnm3          | JUC0100015849.mm.1 | 2,58   | 0,001623 | 0,332831                     |      |
| TC0100003382.mm.1 | 5,39 Dnm3          | PSR0100027727.mm.1 | 2,32   | 0,008904 | 0,410728 Cassette Exon       | 0,13 |
| TC0100003382.mm.1 | 5,39 Dnm3          | PSR0100027711.mm.1 | -2,12  | 0,015133 | 0,452685 Cassette Exon       | 0,31 |
| TC0100003382.mm.1 | 5,39 Dnm3          | PSR0100027709.mm.1 | -2,24  | 0,013908 | 0,445962 Cassette Exon       | 0,15 |
| TC0100003382.mm.1 | 5,39 Dnm3          | PSR0100027697.mm.1 | -2,54  | 0,023249 | 0,490032                     |      |
| TC0100003382.mm.1 | 5,39 Dnm3          | PSR0100027710.mm.1 | -2,75  | 0,04804  | 0,559636 Cassette Exon       | 0,31 |
| TC0100003382.mm.1 | 5,39 Dnm3          | JUC0100015865.mm.1 | -2,93  | 0,043138 | 0,548664                     |      |
| TC0100003382.mm.1 | 5,39 Dnm3          | JUC0100015845.mm.1 | -3,11  | 0,0157   | 0,455416                     |      |
| TC0100003382.mm.1 | 5,39 Dnm3          | JUC0100015869.mm.1 | -3,62  | 0,025862 | 0,498741                     |      |
| TC0100003382.mm.1 | 5,39 Dnm3          | JUC0100015860.mm.1 | -3,69  | 0,007806 | 0,403089                     |      |
| TC0100003382.mm.1 | 5,39 Dnm3          | PSR0100027725.mm.1 | -4,08  | 0,015349 | 0,453763 Alternative 5' Donc | 0,4  |
| TC0100003382.mm.1 | 5,39 Dnm3          | PSR0100027744.mm.1 | -4,6   | 0,031309 | 0,516204 Alternative 5' Donc | 0,48 |
| TC0100003382.mm.1 | 5,39 Dnm3          | PSR0100027696.mm.1 | -5,23  | 0,013193 | 0,440783                     |      |
| TC0100003382.mm.1 | 5,39 Dnm3          | PSR0100027721.mm.1 | -5,35  | 0,004882 | 0,372195 Cassette Exon       | 0,28 |
| TC0100003382.mm.1 | 5,39 Dnm3          | PSR0100027699.mm.1 | -5,36  | 0,028519 | 0,50743 Alternative 5' Donc  | 0,47 |
| TC0100003382.mm.1 | 5,39 Dnm3          | PSR0100027733.mm.1 | -5,56  | 0,001296 | 0,322705 Intron Retention    | 0,75 |
| TC0100003382.mm.1 | 5,39 Dnm3          | JUC0100015863.mm.1 | -6,5   | 0,00448  | 0,367858                     |      |
| TC0100003382.mm.1 | 5,39 Dnm3          | PSR0100027707.mm.1 | -6,67  | 0,00127  | 0,322251 Cassette Exon       | 0,41 |
| TC0100003382.mm.1 | 5,39 Dnm3          | PSR0100027742.mm.1 | -7,19  | 0,007022 | 0,395932 Cassette Exon       | 0,21 |
| TC0100003382.mm.1 | 5,39 Dnm3          | JUC0100015861.mm.1 | -7,19  | 0,034569 | 0,525975                     |      |
| TC0100003382.mm.1 | 5,39 Dnm3          | PSR0100027716.mm.1 | -7,94  | 0,005666 | 0,381922 Cassette Exon       | 0,38 |
| TC0100003382.mm.1 | 5,39 Dnm3          | JUC0100015868.mm.1 | -8,25  | 0,022308 | 0,486127                     |      |
| TC0100003382.mm.1 | 5,39 Dnm3          | PSR0100027708.mm.1 | -8,95  | 0,007481 | 0,400439 Cassette Exon       | 0,41 |
| TC0100003382.mm.1 | 5,39 Dnm3          | PSR0100027738.mm.1 | -13,36 | 0,008201 | 0,405909 Cassette Exon       | 0,44 |
| TC0X00000557.mm.1 | 3,05 C230004F18Rik | PSR0X00003703.mm.1 | 4,18   | 0,007046 | 0,396259 Intron Retention    | 0,38 |
| TC0X00000557.mm.1 | 3,05 C230004F18Rik | PSR0X00003712.mm.1 | -2,44  | 0,036583 | 0,531424 Cassette Exon       | 0,19 |
| TC0X00000557.mm.1 | 3,05 C230004F18Rik | JUC0X00001905.mm.1 | -5,2   | 0,038013 | 0,535454                     |      |
| TC1600001744.mm.1 | 1,35 Cep97         | JUC1600007356.mm.1 | 4,18   | 0,027767 | 0,505135                     |      |
| TC1600001744.mm.1 | 1,35 Cep97         | PSR1600014119.mm.1 | -2,14  | 0,047992 | 0,559574 Alternative 3' Acce | 0,32 |
| TC1600001744.mm.1 | 1,35 Cep97         | JUC1600007354.mm.1 | -2,35  | 0,04084  | 0,543283                     |      |
| TC0200005377.mm.1 | 1,02 C330013J21Rik | PSR0200045726.mm.1 | 4,18   | 0,018454 | 0,468671 Cassette Exon       | 0,28 |
| TC0200005377.mm.1 | 1,02 C330013J21Rik | JUC0200023534.mm.1 | 2,89   | 0,029286 | 0,509874                     |      |
| TC0300001173.mm.1 | -1,22 Col11a1      | JUC0300004991.mm.1 | 4,18   | 0,024299 | 0,49362                      |      |
| TC0300001173.mm.1 | -1,22 Col11a1      | PSR0300009581.mm.1 | 2,34   | 0,008436 | 0,406611 Cassette Exon       | 0,12 |
| TC1400002230.mm.1 | -1,31 Gm17116      | JUC1400009451.mm.1 | 4,18   | 0,030286 | 0,512627                     |      |
| TC0300000747.mm.1 | 1,07 Pklr          | JUC0300002901.mm.1 | 4,17   | 0,002572 | 0,349501                     |      |
| TC0300000747.mm.1 | 1,07 Pklr          | PSR0300005490.mm.1 | 2,02   | 0,000366 | 0,291725 Cassette Exon       | 0,14 |
| TC0300000747.mm.1 | 1,07 Pklr          | PSR0300005477.mm.1 | -2,32  | 0,038492 | 0,536557 Cassette Exon       | 0,11 |
| TC0700004075.mm.1 | 1,13 Trim66        | JUC0700017655.mm.1 | 4,17   | 0,009673 | 0,417579                     |      |
| TC0700004075.mm.1 | 1,13 Trim66        | JUC0700017663.mm.1 | -2,15  | 0,006873 | 0,394271                     |      |
| TC0400003473.mm.1 | -1,16 Cap1         | JUC0400014661.mm.1 | 4,17   | 0,024431 | 0,493932                     |      |
| TC0400002665.mm.1 | 1,22 Abca1         | JUC0400011178.mm.1 | 4,17   | 0,003641 | 0,356757                     |      |

|                   |                           |                    |       |          |          |                          |
|-------------------|---------------------------|--------------------|-------|----------|----------|--------------------------|
| TC0400002665.mm.1 | 1,22 Abca1                | JUC0400011204.mm.1 | 2,37  | 0,04565  | 0,554766 |                          |
| TC0600003474.mm.1 | -1,21 Fam60a              | PSR0600027461.mm.1 | 4,16  | 0,011411 | 0,427582 | Alternative 3' Acce 0,47 |
| TC0300000716.mm.1 | 1,47 Mef2d                | JUC0300002620.mm.1 | 4,16  | 0,014585 | 0,449876 |                          |
| TC0300000716.mm.1 | 1,47 Mef2d                | JUC0300002621.mm.1 | -2,02 | 0,037545 | 0,534001 |                          |
| TC0300000716.mm.1 | 1,47 Mef2d                | JUC0300002613.mm.1 | -2,34 | 0,017494 | 0,463964 |                          |
| TC0100001955.mm.1 | 1,2 Arfgef1               | JUC0100009091.mm.1 | 4,16  | 0,004408 | 0,366753 |                          |
| TC1600000436.mm.1 | 1,01 Rnf168               | JUC1600002079.mm.1 | 4,16  | 0,014313 | 0,448078 |                          |
| TC1300002314.mm.1 | 1,05 Ahrr                 | JUC1300007977.mm.1 | 4,15  | 0,000041 | 0,245341 |                          |
| TC1300002314.mm.1 | 1,05 Ahrr                 | PSR1300015204.mm.1 | 3,28  | 0,039205 | 0,538692 | Cassette Exon 0,36       |
| TC1300002314.mm.1 | 1,05 Ahrr                 | PSR1300015201.mm.1 | 2,49  | 0,01177  | 0,430069 | Alternative 3' Acce 0,21 |
| TC1300002314.mm.1 | 1,05 Ahrr                 | PSR1300015206.mm.1 | 2,17  | 0,014812 | 0,451034 | Cassette Exon 0,26       |
| TC1100000327.mm.1 | 1,22 Nsg2                 | JUC1100001472.mm.1 | 4,15  | 0,002494 | 0,349135 |                          |
| TC1100000327.mm.1 | 1,22 Nsg2                 | JUC1100001471.mm.1 | 2,71  | 0,000469 | 0,298999 |                          |
| TC1100000327.mm.1 | 1,22 Nsg2                 | JUC1100001474.mm.1 | 2,29  | 0,00505  | 0,374728 |                          |
| TC1100000327.mm.1 | 1,22 Nsg2                 | PSR1100002771.mm.1 | 2,15  | 0,007173 | 0,397855 | Cassette Exon 0,18       |
| TC0900001052.mm.1 | -1,29 Ddx43               | JUC0900004492.mm.1 | 4,15  | 0,005938 | 0,385008 |                          |
| TC0900001052.mm.1 | -1,29 Ddx43               | PSR0900008289.mm.1 | -2,18 | 0,014718 | 0,45037  |                          |
| TC0900001052.mm.1 | -1,29 Ddx43               | JUC0900004496.mm.1 | -2,77 | 0,008531 | 0,407721 |                          |
| TC0700000934.mm.1 | 1,4 A230056P14Rik; Gm1588 | JUC0700004290.mm.1 | 4,15  | 0,028372 | 0,506881 |                          |
| TC0400002013.mm.1 | -1,22 Tnfrsf25            | JUC0400008639.mm.1 | 4,15  | 0,005332 | 0,378059 |                          |
| TC0900000674.mm.1 | 1,78 Al118078             | PSR0900004852.mm.1 | 4,14  | 0,000123 | 0,270905 | Cassette Exon 0,27       |
| TC0900000674.mm.1 | 1,78 Al118078             | PSR0900004846.mm.1 | -3,56 | 0,005677 | 0,382164 | Cassette Exon 0,24       |
| TC0400002800.mm.1 | 1,63 Whrn                 | JUC0400012012.mm.1 | 4,14  | 0,000324 | 0,288663 |                          |
| TC0400002800.mm.1 | 1,63 Whrn                 | JUC0400012006.mm.1 | 3,14  | 0,001591 | 0,331726 |                          |
| TC0400002800.mm.1 | 1,63 Whrn                 | JUC0400012011.mm.1 | 2,23  | 0,009791 | 0,417839 |                          |
| TC0400002800.mm.1 | 1,63 Whrn                 | JUC0400012014.mm.1 | 2,15  | 0,005707 | 0,382524 |                          |
| TC0400002800.mm.1 | 1,63 Whrn                 | PSR0400023044.mm.1 | 2,05  | 0,022456 | 0,487003 | Cassette Exon 0,16       |
| TC0400002800.mm.1 | 1,63 Whrn                 | JUC0400012016.mm.1 | -2,01 | 0,029772 | 0,511132 |                          |
| TC0400002800.mm.1 | 1,63 Whrn                 | JUC0400012013.mm.1 | -2,27 | 0,036671 | 0,531675 |                          |
| TC0400002800.mm.1 | 1,63 Whrn                 | PSR0400023040.mm.1 | -2,28 | 0,008607 | 0,40841  | Cassette Exon 0,1        |
| TC0400002800.mm.1 | 1,63 Whrn                 | JUC0400012017.mm.1 | -2,28 | 0,047319 | 0,558291 |                          |
| TC1100003841.mm.1 | 1,33 Gpatch8              | JUC1100018745.mm.1 | 4,14  | 0,000891 | 0,313363 |                          |
| TC1700000428.mm.1 | 1,4 Syngap1               | JUC1700001994.mm.1 | 4,14  | 0,021417 | 0,482126 |                          |
| TC1700000428.mm.1 | 1,4 Syngap1               | JUC1700001996.mm.1 | -2,19 | 0,001783 | 0,336311 |                          |
| TC1700000428.mm.1 | 1,4 Syngap1               | JUC1700001998.mm.1 | -2,76 | 0,044469 | 0,551693 |                          |
| TC0700004108.mm.1 | -1,14 Eif4g2; Gm23262     | PSR0700034062.mm.1 | 4,14  | 0,019858 | 0,475698 |                          |
| TC1500000791.mm.1 | -1,01 Prr5                | JUC1500003502.mm.1 | 4,13  | 0,004435 | 0,366981 |                          |
| TC1500000791.mm.1 | -1,01 Prr5                | PSR1500006231.mm.1 | 2,05  | 0,006728 | 0,393343 | Cassette Exon 0,12       |
| TC0100003874.mm.1 | -1,29 Ankrd23             | JUC0100009918.mm.1 | 4,13  | 0,043654 | 0,550225 |                          |
| TC0800000592.mm.1 | 1,62 Gpm6a                | JUC0800002216.mm.1 | 4,13  | 0,025259 | 0,496939 |                          |
| TC1200002422.mm.1 | 2,52 Rd3l                 | JUC1200009273.mm.1 | 4,12  | 0,047659 | 0,558821 |                          |
| TC1200002422.mm.1 | 2,52 Rd3l                 | JUC1200009274.mm.1 | -2,99 | 0,02596  | 0,499144 |                          |
| TC1200002422.mm.1 | 2,52 Rd3l                 | PSR1200016831.mm.1 | -5,25 | 0,002097 | 0,342919 | Intron Retention 0,75    |
| TC0400002854.mm.1 | 1,2 Tle1                  | JUC0400012189.mm.1 | 4,12  | 0,005002 | 0,373851 |                          |
| TC0400002854.mm.1 | 1,2 Tle1                  | PSR0400023375.mm.1 | 2,04  | 0,017932 | 0,466466 | Cassette Exon 0,09       |
| TC0400002854.mm.1 | 1,2 Tle1                  | PSR0400023327.mm.1 | -2,04 | 0,027397 | 0,503961 | Alternative 3' Acce 0,17 |
| TC1200002195.mm.1 | 2,08 Eml5                 | JUC1200008360.mm.1 | 4,12  | 0,011499 | 0,428152 |                          |
| TC1200002195.mm.1 | 2,08 Eml5                 | JUC1200008378.mm.1 | 2,56  | 0,000092 | 0,255472 |                          |

|                   |                            |                    |       |          |                              |      |
|-------------------|----------------------------|--------------------|-------|----------|------------------------------|------|
| TC1200002195.mm.1 | 2,08 Eml5                  | PSR1200015160.mm.1 | -2,05 | 0,033038 | 0,521501 Cassette Exon       | 0,11 |
| TC1200002195.mm.1 | 2,08 Eml5                  | JUC1200008367.mm.1 | -2,5  | 0,005198 | 0,377015                     |      |
| TC1200002195.mm.1 | 2,08 Eml5                  | PSR1200015177.mm.1 | -2,6  | 0,004562 | 0,369273 Alternative 3' Acce | 0,14 |
| TC1200002195.mm.1 | 2,08 Eml5                  | JUC1200008388.mm.1 | -2,87 | 0,0122   | 0,433268                     |      |
| TC1200002195.mm.1 | 2,08 Eml5                  | JUC1200008355.mm.1 | -3,23 | 0,01328  | 0,441719                     |      |
| TC0700004667.mm.1 | 1,4 Ctpb2                  | PSR0700036874.mm.1 | 4,12  | 0,046377 | 0,556329 Alternative 5' Donc | 0,13 |
| TC1700000691.mm.1 | -1,37 Pou5f1               | JUC1700003870.mm.1 | 4,11  | 0,02794  | 0,505612                     |      |
| TC0600003039.mm.1 | 1,16 Ccdc77                | JUC0600012243.mm.1 | 4,11  | 0,015253 | 0,452847                     |      |
| TC1000001374.mm.1 | 2,53 Mdm1                  | PSR1000010259.mm.1 | 4,1   | 0,000535 | 0,304044 Cassette Exon       | 0,39 |
| TC1000001374.mm.1 | 2,53 Mdm1                  | PSR1000010252.mm.1 | 3,3   | 0,000628 | 0,304044 Cassette Exon       | 0,24 |
| TC1000001374.mm.1 | 2,53 Mdm1                  | JUC1000005547.mm.1 | 2,96  | 0,008251 | 0,405976                     |      |
| TC1000001374.mm.1 | 2,53 Mdm1                  | PSR1000010248.mm.1 | 2,89  | 0,001849 | 0,337414 Cassette Exon       | 0,23 |
| TC1000001374.mm.1 | 2,53 Mdm1                  | PSR1000010250.mm.1 | 2,7   | 0,007164 | 0,397855                     |      |
| TC1000001374.mm.1 | 2,53 Mdm1                  | PSR1000010257.mm.1 | 2,33  | 0,008906 | 0,410728 Cassette Exon       | 0,22 |
| TC1000001374.mm.1 | 2,53 Mdm1                  | JUC1000005546.mm.1 | 2,3   | 0,004247 | 0,363417                     |      |
| TC1000001374.mm.1 | 2,53 Mdm1                  | PSR1000010255.mm.1 | 2,25  | 0,005821 | 0,383169 Cassette Exon       | 0,13 |
| TC1000001374.mm.1 | 2,53 Mdm1                  | JUC1000005541.mm.1 | 2,24  | 0,006692 | 0,393293                     |      |
| TC1000001374.mm.1 | 2,53 Mdm1                  | PSR1000010246.mm.1 | -2,04 | 0,039201 | 0,538692 Cassette Exon       | 0,13 |
| TC1000001374.mm.1 | 2,53 Mdm1                  | JUC1000005550.mm.1 | -2,43 | 0,009917 | 0,418378                     |      |
| TC1000001374.mm.1 | 2,53 Mdm1                  | PSR1000010247.mm.1 | -2,67 | 0,006056 | 0,386642 Cassette Exon       | 0,16 |
| TC1000001374.mm.1 | 2,53 Mdm1                  | JUC1000005556.mm.1 | -2,86 | 0,009312 | 0,414883                     |      |
| TC1000001374.mm.1 | 2,53 Mdm1                  | JUC1000005551.mm.1 | -6,18 | 0,00173  | 0,335996                     |      |
| TC1800000962.mm.1 | -1,28 Ccny                 | PSR1800007137.mm.1 | 4,1   | 0,031315 | 0,516204 Alternative 5' Donc | 0,32 |
| TC1800000962.mm.1 | -1,28 Ccny                 | PSR1800007135.mm.1 | 2,02  | 0,04961  | 0,563407 Alternative 5' Donc | 0,31 |
| TC0400000435.mm.1 | -1,13 Rusc2                | JUC0400001428.mm.1 | 4,1   | 0,042232 | 0,547034                     |      |
| TC0100003835.mm.1 | -1,48 Traf3ip3             | PSR0100031358.mm.1 | 4,09  | 0,038338 | 0,53622 Cassette Exon        | 0,28 |
| TC0100003835.mm.1 | -1,48 Traf3ip3             | PSR0100031362.mm.1 | 3,56  | 0,018852 | 0,470954 Alternative 5' Donc | 0,19 |
| TC0600002084.mm.1 | 1,87 Dgki                  | JUC0600008562.mm.1 | 4,09  | 0,016164 | 0,457969                     |      |
| TC0600002084.mm.1 | 1,87 Dgki                  | JUC0600008560.mm.1 | 3,37  | 0,001531 | 0,330287                     |      |
| TC0600002084.mm.1 | 1,87 Dgki                  | PSR0600016364.mm.1 | -2,02 | 0,041831 | 0,545586 Cassette Exon       | 0,08 |
| TC0600002084.mm.1 | 1,87 Dgki                  | JUC0600008566.mm.1 | -2,14 | 0,034115 | 0,524882                     |      |
| TC0600002084.mm.1 | 1,87 Dgki                  | PSR0600016381.mm.1 | -2,21 | 0,024815 | 0,495292 Cassette Exon       | 0,19 |
| TC0600002084.mm.1 | 1,87 Dgki                  | JUC0600008586.mm.1 | -2,27 | 0,037199 | 0,533261                     |      |
| TC0700000720.mm.1 | 1,8 Vstm2b                 | JUC0700002931.mm.1 | 4,08  | 0,00414  | 0,3623                       |      |
| TC0700000720.mm.1 | 1,8 Vstm2b                 | PSR0700005888.mm.1 | 2,56  | 0,013909 | 0,445962 Cassette Exon       | 0,18 |
| TC1400002650.mm.1 | -1,55                      | JUC1400010916.mm.1 | 4,08  | 0,000286 | 0,28803                      |      |
| TC1300000978.mm.1 | 1,77 C130071C03Rik; Mir9-2 | PSR1300006309.mm.1 | 4,07  | 0,002867 | 0,352207 Alternative 5' Donc | 0,48 |
| TC1300000978.mm.1 | 1,77 C130071C03Rik; Mir9-2 | JUC1300003324.mm.1 | -2,84 | 0,036317 | 0,530547                     |      |
| TC0200002075.mm.1 | -1,1 Ankef1; BC034902      | JUC0200008317.mm.1 | 4,07  | 0,009069 | 0,412827                     |      |
| TC0200002075.mm.1 | -1,1 Ankef1; BC034902      | PSR0200016520.mm.1 | 3,39  | 0,004621 | 0,369794 Cassette Exon       | 0,31 |
| TC0200002075.mm.1 | -1,1 Ankef1; BC034902      | JUC0200008324.mm.1 | 2,95  | 0,006513 | 0,391376                     |      |
| TC0200002075.mm.1 | -1,1 Ankef1; BC034902      | PSR0200016523.mm.1 | 2,11  | 0,001131 | 0,317328 Cassette Exon       | 0,1  |
| TC0500001270.mm.1 | -1,11 Cit                  | JUC0500006051.mm.1 | 4,07  | 0,001098 | 0,317328                     |      |
| TC0400003042.mm.1 | 1,11                       | JUC0400012711.mm.1 | 4,07  | 0,046574 | 0,556761                     |      |
| TC0300000334.mm.1 | 2,4 Pcdh10                 | JUC0300001268.mm.1 | 4,06  | 0,016668 | 0,460057                     |      |
| TC0300000334.mm.1 | 2,4 Pcdh10                 | JUC0300001270.mm.1 | 2,62  | 0,004488 | 0,367995                     |      |
| TC0300000334.mm.1 | 2,4 Pcdh10                 | JUC0300001269.mm.1 | 2,23  | 0,000508 | 0,303579                     |      |
| TC0300000334.mm.1 | 2,4 Pcdh10                 | PSR0300002462.mm.1 | -2,01 | 0,009961 | 0,418429 Alternative 5' Donc | 0,15 |

|                   |                                 |                     |       |          |                              |      |
|-------------------|---------------------------------|---------------------|-------|----------|------------------------------|------|
| TC0300000334.mm.1 | 2,4 Pcdh10                      | PSR0300002453.mm.1  | -3,53 | 0,003734 | 0,357586 Alternative 5' Donc | 0,54 |
| TC0300000334.mm.1 | 2,4 Pcdh10                      | JUC0300001271.mm.1  | -4,65 | 0,003737 | 0,357586                     |      |
| TC0700000907.mm.1 | 1,58 Slc6a5                     | JUC0700004102.mm.1  | 4,06  | 0,012459 | 0,435282                     |      |
| TC0700000907.mm.1 | 1,58 Slc6a5                     | PSR0700008183.mm.1  | 3,51  | 0,015205 | 0,452738 Cassette Exon       | 0,24 |
| TC0700000907.mm.1 | 1,58 Slc6a5                     | JUC0700004099.mm.1  | 3,27  | 0,041084 | 0,543902                     |      |
| TC0500003117.mm.1 | 1,94 Srrm4                      | JUC0500015115.mm.1  | 4,05  | 0,012178 | 0,433072                     |      |
| TC0500003117.mm.1 | 1,94 Srrm4                      | PSR0500027756.mm.1  | 3,15  | 0,021595 | 0,4833 Cassette Exon         | 0,33 |
| TC0500003117.mm.1 | 1,94 Srrm4                      | JUC0500015119.mm.1  | 3,03  | 0,016439 | 0,459014                     |      |
| TC0500003117.mm.1 | 1,94 Srrm4                      | PSR0500027758.mm.1  | 3,01  | 0,000657 | 0,304044 Alternative 3' Acce | 0,25 |
| TC0500003117.mm.1 | 1,94 Srrm4                      | PSR0500027770.mm.1  | 2,09  | 0,031379 | 0,516345 Cassette Exon       | 0,09 |
| TC0500003117.mm.1 | 1,94 Srrm4                      | PSR0500027762.mm.1  | -2,25 | 0,020117 | 0,47686 Cassette Exon        | 0,1  |
| TC0500003117.mm.1 | 1,94 Srrm4                      | PSR0500027754.mm.1  | -2,44 | 0,048024 | 0,55961 Alternative 5' Donc  | 0,15 |
| TC0700004537.mm.1 | 1,3 Cend1                       | PSR07000038147.mm.1 | 4,05  | 0,028091 | 0,50608 Alternative 5' Donc  | 0,27 |
| TC0200002099.mm.1 | 1,32 Macrod2                    | JUC0200008421.mm.1  | 4,05  | 0,024855 | 0,495511                     |      |
| TC0200002099.mm.1 | 1,32 Macrod2                    | PSR0200016721.mm.1  | 2,7   | 0,003073 | 0,353892 Cassette Exon       | 0,15 |
| TC0200002099.mm.1 | 1,32 Macrod2                    | PSR0200016720.mm.1  | 2,61  | 0,002964 | 0,352501 Cassette Exon       | 0,15 |
| TC0200002099.mm.1 | 1,32 Macrod2                    | PSR0200016713.mm.1  | 2,18  | 0,016391 | 0,458754 Cassette Exon       | 0,09 |
| TC0200002099.mm.1 | 1,32 Macrod2                    | JUC0200008446.mm.1  | -3,36 | 0,005952 | 0,385276                     |      |
| TC1800000791.mm.1 | -1,18 Myo5b                     | JUC1800003164.mm.1  | 4,05  | 0,011933 | 0,431703                     |      |
| TC1800000791.mm.1 | -1,18 Myo5b                     | JUC1800003151.mm.1  | 3,04  | 0,022271 | 0,485954                     |      |
| TC0100001744.mm.1 | -1,31 1700047M11Rik             | JUC0100008258.mm.1  | 4,05  | 0,013055 | 0,439579                     |      |
| TC1500002226.mm.1 | -1,16                           | JUC1500010411.mm.1  | 4,05  | 0,004719 | 0,370888                     |      |
| TC0500001757.mm.1 | 1,04 Trrap                      | JUC0500008855.mm.1  | 4,05  | 0,007749 | 0,402774                     |      |
| TC0500001757.mm.1 | 1,04 Trrap                      | JUC0500008858.mm.1  | 3,02  | 0,048155 | 0,560004                     |      |
| TC0500001757.mm.1 | 1,04 Trrap                      | JUC0500008798.mm.1  | -2,56 | 0,018346 | 0,468287                     |      |
| TC1100001786.mm.1 | -1 Cep95                        | JUC1100008798.mm.1  | 4,05  | 0,009215 | 0,414093                     |      |
| TC0X00000963.mm.1 | 1,15 Dlg3                       | PSR0X00006302.mm.1  | 4,04  | 0,008659 | 0,408463 Cassette Exon       | 0,36 |
| TC0X00000963.mm.1 | 1,15 Dlg3                       | JUC0X00003096.mm.1  | 3,18  | 0,009792 | 0,417839                     |      |
| TC0X00000963.mm.1 | 1,15 Dlg3                       | JUC0X00003093.mm.1  | 2,05  | 0,042017 | 0,546122                     |      |
| TC1800000124.mm.1 | -1,08 Taf4b                     | PSR1800000908.mm.1  | 4,04  | 0,00088  | 0,312015 Cassette Exon       | 0,29 |
| TC1800000124.mm.1 | -1,08 Taf4b                     | JUC1800000532.mm.1  | 2,25  | 0,0252   | 0,49668                      |      |
| TC1300000174.mm.1 | -1,49 Hist1h3h; Hist1h3g; Hist1 | PSR1300001169.mm.1  | 4,04  | 0,04289  | 0,548183 Cassette Exon       | 0,28 |
| TC0X00002199.mm.1 | -1,08 Hs6st2                    | JUC0X00007193.mm.1  | 4,04  | 0,001744 | 0,335996                     |      |
| TC0X00002199.mm.1 | -1,08 Hs6st2                    | JUC0X00007197.mm.1  | 2,04  | 0,046851 | 0,557261                     |      |
| TC0X00002199.mm.1 | -1,08 Hs6st2                    | PSR0X00014051.mm.1  | 2,02  | 0,012785 | 0,437236 Alternative 5' Donc | 0,17 |
| TC0600001335.mm.1 | 9,58 Cacna2d4                   | PSR0600010576.mm.1  | 4,03  | 0,031733 | 0,517489 Cassette Exon       | 0,32 |
| TC0600001335.mm.1 | 9,58 Cacna2d4                   | JUC0600005498.mm.1  | 4,01  | 0,017231 | 0,462633                     |      |
| TC0600001335.mm.1 | 9,58 Cacna2d4                   | JUC0600005496.mm.1  | 3,07  | 0,010897 | 0,424424                     |      |
| TC0600001335.mm.1 | 9,58 Cacna2d4                   | JUC0600005503.mm.1  | 2,42  | 0,001026 | 0,316361                     |      |
| TC0600001335.mm.1 | 9,58 Cacna2d4                   | PSR0600010593.mm.1  | 2,34  | 0,012166 | 0,432998 Cassette Exon       | 0,14 |
| TC0600001335.mm.1 | 9,58 Cacna2d4                   | JUC0600005523.mm.1  | 2,31  | 0,004613 | 0,369794                     |      |
| TC0600001335.mm.1 | 9,58 Cacna2d4                   | PSR0600010581.mm.1  | 2,1   | 0,003157 | 0,353892 Cassette Exon       | 0,19 |
| TC0600001335.mm.1 | 9,58 Cacna2d4                   | PSR0600010583.mm.1  | 2,04  | 0,003272 | 0,354243 Cassette Exon       | 0,28 |
| TC0600001335.mm.1 | 9,58 Cacna2d4                   | PSR0600010597.mm.1  | -2,22 | 0,001428 | 0,327447 Cassette Exon       | 0,32 |
| TC0600001335.mm.1 | 9,58 Cacna2d4                   | PSR0600010604.mm.1  | -2,3  | 0,020966 | 0,479982 Cassette Exon       | 0,27 |
| TC0600001335.mm.1 | 9,58 Cacna2d4                   | PSR0600010598.mm.1  | -2,41 | 0,010192 | 0,419711 Cassette Exon       | 0,34 |
| TC0600001335.mm.1 | 9,58 Cacna2d4                   | PSR0600010608.mm.1  | -2,51 | 0,003479 | 0,355638 Cassette Exon       | 0,29 |
| TC0600001335.mm.1 | 9,58 Cacna2d4                   | JUC0600005510.mm.1  | -2,68 | 0,035541 | 0,528764                     |      |



|                   |                        |                    |        |          |          |                     |      |
|-------------------|------------------------|--------------------|--------|----------|----------|---------------------|------|
| TC0600001335.mm.1 | 9,58 Cacna2d4          | PSR0600010600.mm.1 | -3,21  | 0,001665 | 0,335182 | Cassette Exon       | 0,34 |
| TC0600001335.mm.1 | 9,58 Cacna2d4          | JUC0600005519.mm.1 | -3,27  | 0,001563 | 0,331357 |                     |      |
| TC0600001335.mm.1 | 9,58 Cacna2d4          | JUC0600005518.mm.1 | -3,32  | 0,029583 | 0,510483 |                     |      |
| TC0600001335.mm.1 | 9,58 Cacna2d4          | JUC0600005515.mm.1 | -3,44  | 0,013721 | 0,444758 |                     |      |
| TC0600001335.mm.1 | 9,58 Cacna2d4          | PSR0600010596.mm.1 | -3,69  | 0,000585 | 0,304044 | Cassette Exon       | 0,37 |
| TC0600001335.mm.1 | 9,58 Cacna2d4          | JUC0600005520.mm.1 | -3,89  | 0,006374 | 0,389488 |                     |      |
| TC0600001335.mm.1 | 9,58 Cacna2d4          | PSR0600010601.mm.1 | -3,93  | 0,0155   | 0,454456 | Cassette Exon       | 0,28 |
| TC0600001335.mm.1 | 9,58 Cacna2d4          | JUC0600005509.mm.1 | -4,25  | 0,023815 | 0,491938 |                     |      |
| TC0600001335.mm.1 | 9,58 Cacna2d4          | JUC0600005517.mm.1 | -4,98  | 0,027799 | 0,505407 |                     |      |
| TC0600001335.mm.1 | 9,58 Cacna2d4          | PSR0600010610.mm.1 | -5,57  | 0,001331 | 0,325349 | Cassette Exon       | 0,33 |
| TC0600001335.mm.1 | 9,58 Cacna2d4          | PSR0600010599.mm.1 | -6,84  | 0,003539 | 0,3562   | Cassette Exon       | 0,55 |
| TC0600001335.mm.1 | 9,58 Cacna2d4          | PSR0600010571.mm.1 | -7,05  | 0,001352 | 0,325427 | Alternative 3' Acce | 0,37 |
| TC0600001335.mm.1 | 9,58 Cacna2d4          | JUC0600005512.mm.1 | -7,92  | 0,004216 | 0,363236 |                     |      |
| TC0600001335.mm.1 | 9,58 Cacna2d4          | JUC0600005511.mm.1 | -8,97  | 0,000585 | 0,304044 |                     |      |
| TC0600001335.mm.1 | 9,58 Cacna2d4          | JUC0600005502.mm.1 | -11,29 | 0,014773 | 0,450801 |                     |      |
| TC0600001335.mm.1 | 9,58 Cacna2d4          | JUC0600005522.mm.1 | -11,89 | 0,000037 | 0,238339 |                     |      |
| TC0600001335.mm.1 | 9,58 Cacna2d4          | PSR0600010578.mm.1 | -12,36 | 0,000833 | 0,311886 | Cassette Exon       | 0,27 |
| TC1700002316.mm.1 | 1,25 Sema6b            | JUC1700011539.mm.1 | 4,03   | 0,005027 | 0,374176 |                     |      |
| TC1700002316.mm.1 | 1,25 Sema6b            | JUC1700011537.mm.1 | 3,17   | 0,030084 | 0,511908 |                     |      |
| TC1700002316.mm.1 | 1,25 Sema6b            | PSR1700021622.mm.1 | -2,15  | 0,000136 | 0,270912 | Cassette Exon       | 0,11 |
| TC1700002316.mm.1 | 1,25 Sema6b            | JUC1700011536.mm.1 | -2,3   | 0,003248 | 0,354243 |                     |      |
| TC1400002740.mm.1 | 1,02 Dock9             | PSR1400020397.mm.1 | 4,02   | 0,019872 | 0,475704 | Cassette Exon       | 0,33 |
| TC1200001207.mm.1 | -1,01 Ppp2r5c          | PSR1200008435.mm.1 | 4,02   | 0,034181 | 0,525025 | Cassette Exon       | 0,32 |
| TC1200001207.mm.1 | -1,01 Ppp2r5c          | PSR1200008433.mm.1 | 2,27   | 0,029503 | 0,510123 | Cassette Exon       | 0,16 |
| TC0300001041.mm.1 | -1,43 Nras             | JUC0300004322.mm.1 | 4      | 0,014019 | 0,446496 |                     |      |
| TC0300001041.mm.1 | -1,43 Nras             | JUC0300004330.mm.1 | 2,42   | 0,011104 | 0,426    |                     |      |
| TC1400000104.mm.1 | 2,26 Synpr             | JUC1400000516.mm.1 | 3,99   | 0,000999 | 0,316361 |                     |      |
| TC1400000104.mm.1 | 2,26 Synpr             | PSR1400000853.mm.1 | -2,27  | 0,001981 | 0,341091 | Cassette Exon       | 0,07 |
| TC1400000104.mm.1 | 2,26 Synpr             | PSR1400000857.mm.1 | -2,56  | 0,018609 | 0,469665 | Alternative 5' Donc | 0,21 |
| TC1400000104.mm.1 | 2,26 Synpr             | PSR1400000852.mm.1 | -2,63  | 0,048549 | 0,561008 | Cassette Exon       | 0,09 |
| TC1400000104.mm.1 | 2,26 Synpr             | PSR1400000847.mm.1 | -2,65  | 0,040591 | 0,542474 | Cassette Exon       | 0,19 |
| TC1400000104.mm.1 | 2,26 Synpr             | JUC1400000521.mm.1 | -2,69  | 0,008044 | 0,40434  |                     |      |
| TC1400000104.mm.1 | 2,26 Synpr             | JUC1400000515.mm.1 | -2,82  | 0,010389 | 0,421341 |                     |      |
| TC1400000104.mm.1 | 2,26 Synpr             | PSR1400000861.mm.1 | -4,72  | 0,000291 | 0,288663 | Alternative 5' Donc | 0,42 |
| TC1400000104.mm.1 | 2,26 Synpr             | PSR1400000850.mm.1 | -5,56  | 0,009534 | 0,416602 | Alternative 3' Acce | 0,22 |
| TC0600001176.mm.1 | 1,7 Cntn6              | JUC0600004652.mm.1 | 3,99   | 0,002466 | 0,349135 |                     |      |
| TC0600001176.mm.1 | 1,7 Cntn6              | PSR0600009073.mm.1 | 2,74   | 0,003026 | 0,353502 | Cassette Exon       | 0,14 |
| TC0600001176.mm.1 | 1,7 Cntn6              | PSR0600009061.mm.1 | 2,44   | 0,022517 | 0,487114 | Cassette Exon       | 0,11 |
| TC0600001176.mm.1 | 1,7 Cntn6              | JUC0600004650.mm.1 | -2,02  | 0,025363 | 0,497403 |                     |      |
| TC0600001176.mm.1 | 1,7 Cntn6              | JUC0600004642.mm.1 | -2,5   | 0,042926 | 0,548271 |                     |      |
| TC0600001176.mm.1 | 1,7 Cntn6              | PSR0600009053.mm.1 | -2,65  | 0,000356 | 0,290838 | Alternative 3' Acce | 0,24 |
| TC0600001176.mm.1 | 1,7 Cntn6              | JUC0600004660.mm.1 | -2,78  | 0,009671 | 0,417554 |                     |      |
| TC0500003191.mm.1 | -1,13 Mapkapk5; Adam1a | JUC0500015462.mm.1 | 3,99   | 0,002691 | 0,349612 |                     |      |
| TC0400000567.mm.1 | -1,14 Smc2             | JUC0400002056.mm.1 | 3,99   | 0,001281 | 0,322251 |                     |      |
| TC0400000567.mm.1 | -1,14 Smc2             | JUC0400002076.mm.1 | 3,16   | 0,020457 | 0,478018 |                     |      |
| TC1100000109.mm.1 | 2,79 Adcy1             | JUC1100000587.mm.1 | 3,98   | 0,004327 | 0,364665 |                     |      |
| TC1100000109.mm.1 | 2,79 Adcy1             | JUC1100000589.mm.1 | 3,33   | 0,002029 | 0,341377 |                     |      |
| TC1100000109.mm.1 | 2,79 Adcy1             | JUC1100000588.mm.1 | 2,86   | 0,030161 | 0,512193 |                     |      |

|                   |       |                          |                    |       |          |          |                     |      |
|-------------------|-------|--------------------------|--------------------|-------|----------|----------|---------------------|------|
| TC1100000109.mm.1 | 2,79  | Adcy1                    | JUC1100000584.mm.1 | -2,17 | 0,014242 | 0,447947 |                     |      |
| TC1100000109.mm.1 | 2,79  | Adcy1                    | PSR1100001134.mm.1 | -2,28 | 0,00228  | 0,345991 | Cassette Exon       | 0,13 |
| TC1100000109.mm.1 | 2,79  | Adcy1                    | PSR1100001126.mm.1 | -2,28 | 0,001379 | 0,32572  | Cassette Exon       | 0,02 |
| TC1100000109.mm.1 | 2,79  | Adcy1                    | PSR1100001112.mm.1 | -2,49 | 0,000261 | 0,28803  | Cassette Exon       | 0,2  |
| TC1100000109.mm.1 | 2,79  | Adcy1                    | JUC1100000603.mm.1 | -2,63 | 0,01507  | 0,45236  |                     |      |
| TC1100000109.mm.1 | 2,79  | Adcy1                    | PSR1100001111.mm.1 | -2,7  | 0,003336 | 0,354243 | Cassette Exon       | 0,2  |
| TC1100000109.mm.1 | 2,79  | Adcy1                    | JUC1100000600.mm.1 | -2,81 | 0,013382 | 0,442371 |                     |      |
| TC1100000109.mm.1 | 2,79  | Adcy1                    | JUC1100000596.mm.1 | -2,93 | 0,003907 | 0,359564 |                     |      |
| TC1100000109.mm.1 | 2,79  | Adcy1                    | PSR1100001132.mm.1 | -3,08 | 0,040284 | 0,541823 | Cassette Exon       | 0,28 |
| TC1100000109.mm.1 | 2,79  | Adcy1                    | JUC1100000595.mm.1 | -3,56 | 0,005024 | 0,374162 |                     |      |
| TC1100000109.mm.1 | 2,79  | Adcy1                    | JUC1100000597.mm.1 | -3,62 | 0,000374 | 0,291789 |                     |      |
| TC1100000109.mm.1 | 2,79  | Adcy1                    | JUC1100000604.mm.1 | -3,8  | 0,007765 | 0,402774 |                     |      |
| TC1100000109.mm.1 | 2,79  | Adcy1                    | PSR1100001127.mm.1 | -4,01 | 0,014263 | 0,447947 | Alternative 3' Acce | 0,46 |
| TC0800000899.mm.1 | 1,34  | Inpp4b                   | PSR0800006675.mm.1 | 3,98  | 0,01185  | 0,430711 | Cassette Exon       | 0,44 |
| TC0800000899.mm.1 | 1,34  | Inpp4b                   | PSR0800006671.mm.1 | 3,59  | 0,001842 | 0,337414 | Cassette Exon       | 0,29 |
| TC0800000899.mm.1 | 1,34  | Inpp4b                   | JUC0800003531.mm.1 | 3,5   | 0,009054 | 0,412827 |                     |      |
| TC0800000899.mm.1 | 1,34  | Inpp4b                   | JUC0800003537.mm.1 | 3,45  | 0,000784 | 0,309887 |                     |      |
| TC0800000899.mm.1 | 1,34  | Inpp4b                   | JUC0800003534.mm.1 | 2,11  | 0,014905 | 0,451803 |                     |      |
| TC0800000899.mm.1 | 1,34  | Inpp4b                   | PSR0800006674.mm.1 | 2,1   | 0,012685 | 0,436333 | Cassette Exon       | 0,15 |
| TC0800000899.mm.1 | 1,34  | Inpp4b                   | PSR0800006704.mm.1 | -2,26 | 0,007221 | 0,39826  | Cassette Exon       | 0,13 |
| TC0800000899.mm.1 | 1,34  | Inpp4b                   | JUC0800003559.mm.1 | -2,59 | 0,016326 | 0,458616 |                     |      |
| TC1000001549.mm.1 | 1,98  | Agap2                    | JUC1000005885.mm.1 | 3,98  | 0,002392 | 0,348564 |                     |      |
| TC1000001549.mm.1 | 1,98  | Agap2                    | PSR1000010981.mm.1 | 3,93  | 0,000108 | 0,267977 | Cassette Exon       | 0,07 |
| TC1000001549.mm.1 | 1,98  | Agap2                    | JUC1000005889.mm.1 | 3,24  | 0,002082 | 0,342315 |                     |      |
| TC1000001549.mm.1 | 1,98  | Agap2                    | JUC1000005883.mm.1 | 3,21  | 0,000161 | 0,272566 |                     |      |
| TC1000001549.mm.1 | 1,98  | Agap2                    | PSR1000010990.mm.1 | 2,16  | 0,012207 | 0,433286 | Cassette Exon       | 0,14 |
| TC1000001549.mm.1 | 1,98  | Agap2                    | PSR1000010989.mm.1 | 2,13  | 0,0154   | 0,453964 | Cassette Exon       | 0,24 |
| TC1000001549.mm.1 | 1,98  | Agap2                    | PSR1000010998.mm.1 | -2,02 | 0,008433 | 0,406611 | Cassette Exon       | 0,12 |
| TC1000001549.mm.1 | 1,98  | Agap2                    | PSR1000010992.mm.1 | -2,05 | 0,005428 | 0,379581 | Cassette Exon       | 0,12 |
| TC1000001549.mm.1 | 1,98  | Agap2                    | PSR1000010999.mm.1 | -2,47 | 0,006293 | 0,388979 | Cassette Exon       | 0,12 |
| TC1000001549.mm.1 | 1,98  | Agap2                    | PSR1000010979.mm.1 | -2,59 | 0,006595 | 0,39213  | Cassette Exon       | 0,22 |
| TC1000001549.mm.1 | 1,98  | Agap2                    | JUC1000005882.mm.1 | -2,91 | 0,000215 | 0,28803  |                     |      |
| TC1000001549.mm.1 | 1,98  | Agap2                    | PSR1000011000.mm.1 | -2,96 | 0,001435 | 0,327493 | Cassette Exon       | 0,18 |
| TC1000001549.mm.1 | 1,98  | Agap2                    | JUC1000005881.mm.1 | -3,59 | 0,017455 | 0,463886 |                     |      |
| TC0500002178.mm.1 | -1,25 | Ppm1g                    | JUC0500010877.mm.1 | 3,98  | 0,002478 | 0,349135 |                     |      |
| TC0800002838.mm.1 | 1,15  | Cenpt                    | JUC0800011945.mm.1 | 3,98  | 0,002017 | 0,34123  |                     |      |
| TC0800002838.mm.1 | 1,15  | Cenpt                    | JUC0800011951.mm.1 | 2,83  | 0,008909 | 0,410728 |                     |      |
| TC0400003043.mm.1 | 1,93  | Elavl2; Mir6402; mmu-mii | PSR0400024439.mm.1 | 3,97  | 0,003929 | 0,359818 | Cassette Exon       | 0,3  |
| TC0400003043.mm.1 | 1,93  | Elavl2; Mir6402; mmu-mii | PSR0400024443.mm.1 | 2,89  | 0,000216 | 0,28803  | Alternative 3' Acce | 0,32 |
| TC0400003043.mm.1 | 1,93  | Elavl2; Mir6402; mmu-mii | PSR0400024436.mm.1 | -2,03 | 0,006229 | 0,388088 | Alternative 5' Donc | 0,1  |
| TC0400003043.mm.1 | 1,93  | Elavl2; Mir6402; mmu-mii | PSR0400024472.mm.1 | -2,58 | 0,022195 | 0,485794 | Alternative 5' Donc | 0,12 |
| TC0400003043.mm.1 | 1,93  | Elavl2; Mir6402; mmu-mii | JUC0400012727.mm.1 | -2,58 | 0,038272 | 0,536002 |                     |      |
| TC0400003043.mm.1 | 1,93  | Elavl2; Mir6402; mmu-mii | PSR0400024464.mm.1 | -2,64 | 0,021244 | 0,481413 | Alternative 3' Acce | 0,2  |
| TC0400003043.mm.1 | 1,93  | Elavl2; Mir6402; mmu-mii | PSR0400024475.mm.1 | -3,01 | 0,031676 | 0,517405 | Cassette Exon       | 0,25 |
| TC0400003043.mm.1 | 1,93  | Elavl2; Mir6402; mmu-mii | JUC0400012730.mm.1 | -3,89 | 0,023038 | 0,489281 |                     |      |
| TC0400003043.mm.1 | 1,93  | Elavl2; Mir6402; mmu-mii | JUC0400012725.mm.1 | -4,06 | 0,00362  | 0,356223 |                     |      |
| TC0400003043.mm.1 | 1,93  | Elavl2; Mir6402; mmu-mii | PSR0400024453.mm.1 | -5,1  | 0,00515  | 0,37646  | Cassette Exon       | 0,23 |
| TC0200000591.mm.1 | 1,05  | Sh2d3c                   | JUC0200002788.mm.1 | 3,97  | 0,045289 | 0,553726 |                     |      |

|                   |                          |                    |        |          |          |                          |
|-------------------|--------------------------|--------------------|--------|----------|----------|--------------------------|
| TC0200001049.mm.1 | -1,46 Rapgef4            | JUC0200004413.mm.1 | 3,97   | 0,000344 | 0,289576 |                          |
| TC0600002644.mm.1 | -1,64 Anxa4              | JUC0600010640.mm.1 | 3,97   | 0,001575 | 0,331411 |                          |
| TC0600002644.mm.1 | -1,64 Anxa4              | JUC0600010644.mm.1 | 3,93   | 0,007334 | 0,399002 |                          |
| TC0400004208.mm.1 | -1,16 Mup7; Gm2083; Mup1 | JUC0400011673.mm.1 | 3,97   | 0,037262 | 0,533479 |                          |
| TC1400001711.mm.1 | 1,2 Mapk8                | JUC1400007287.mm.1 | 3,95   | 0,013186 | 0,440686 |                          |
| TC1400001711.mm.1 | 1,2 Mapk8                | PSR1400013336.mm.1 | 3,35   | 0,002741 | 0,349612 | Cassette Exon 0,41       |
| TC1400001711.mm.1 | 1,2 Mapk8                | PSR1400013314.mm.1 | 2,52   | 0,029141 | 0,509333 |                          |
| TC1400001711.mm.1 | 1,2 Mapk8                | JUC1400007286.mm.1 | 2,51   | 0,02416  | 0,493245 |                          |
| TC0200001681.mm.1 | -1,02 Fmn1               | PSR0200012485.mm.1 | 3,95   | 0,019033 | 0,471848 | Cassette Exon 0,31       |
| TC0200001681.mm.1 | -1,02 Fmn1               | JUC0200006214.mm.1 | 2,47   | 0,049735 | 0,563552 |                          |
| TC0200002706.mm.1 | -1,02 Tubb1              | JUC0200011244.mm.1 | 3,95   | 0,001901 | 0,338712 |                          |
| TC0900000124.mm.1 | -1,51 Smco4              | JUC0900000450.mm.1 | 3,95   | 0,016016 | 0,457051 |                          |
| TC0500000947.mm.1 | 7,94 Prdm8               | JUC0500004472.mm.1 | 3,94   | 0,007676 | 0,402414 |                          |
| TC0500000947.mm.1 | 7,94 Prdm8               | PSR0500008149.mm.1 | 2,19   | 0,008653 | 0,408463 | Cassette Exon 0,23       |
| TC0500000947.mm.1 | 7,94 Prdm8               | PSR0500008146.mm.1 | -2,09  | 0,006752 | 0,393343 | Alternative 3' Acce 0,17 |
| TC0500000947.mm.1 | 7,94 Prdm8               | PSR0500008148.mm.1 | -3,69  | 0,010347 | 0,421002 | Alternative 5' Donc 0,42 |
| TC1100002788.mm.1 | 4,41 Gira1               | JUC1100013151.mm.1 | 3,94   | 0,043303 | 0,549297 |                          |
| TC1100002788.mm.1 | 4,41 Gira1               | PSR1100025313.mm.1 | 3,42   | 0,000927 | 0,313363 | Cassette Exon 0,22       |
| TC1100002788.mm.1 | 4,41 Gira1               | PSR1100025315.mm.1 | 2,19   | 0,003186 | 0,354243 |                          |
| TC1100002788.mm.1 | 4,41 Gira1               | PSR1100025303.mm.1 | -2,35  | 0,027643 | 0,504658 | Cassette Exon 0,28       |
| TC1100002788.mm.1 | 4,41 Gira1               | PSR1100025320.mm.1 | -2,46  | 0,003093 | 0,353892 | Alternative 5' Donc 0,32 |
| TC1100002788.mm.1 | 4,41 Gira1               | PSR1100025306.mm.1 | -2,71  | 0,005012 | 0,373867 | Cassette Exon 0,28       |
| TC1100002788.mm.1 | 4,41 Gira1               | PSR1100025321.mm.1 | -3,34  | 0,007181 | 0,397855 | Alternative 5' Donc 0,14 |
| TC1100002788.mm.1 | 4,41 Gira1               | PSR1100025309.mm.1 | -3,35  | 0,000081 | 0,25272  | Cassette Exon 0,24       |
| TC1100002788.mm.1 | 4,41 Gira1               | PSR1100025305.mm.1 | -4,84  | 0,002528 | 0,349501 | Cassette Exon 0,28       |
| TC1100002788.mm.1 | 4,41 Gira1               | PSR1100025319.mm.1 | -4,95  | 0,001778 | 0,336311 | Alternative 5' Donc 0,32 |
| TC1100002788.mm.1 | 4,41 Gira1               | JUC1100013154.mm.1 | -5,98  | 0,000291 | 0,288663 |                          |
| TC1100002788.mm.1 | 4,41 Gira1               | PSR1100025318.mm.1 | -6,2   | 0,00071  | 0,306015 | Alternative 5' Donc 0,4  |
| TC1100002788.mm.1 | 4,41 Gira1               | JUC1100013155.mm.1 | -7,98  | 0,004539 | 0,368648 |                          |
| TC1100002788.mm.1 | 4,41 Gira1               | JUC1100013152.mm.1 | -8,02  | 0,011069 | 0,425887 |                          |
| TC1100002788.mm.1 | 4,41 Gira1               | JUC1100013153.mm.1 | -16,49 | 0,000581 | 0,304044 |                          |
| TC0100003010.mm.1 | 2,3 Tmem163              | JUC0100013672.mm.1 | 3,94   | 0,00064  | 0,304044 |                          |
| TC0100003010.mm.1 | 2,3 Tmem163              | JUC0100013671.mm.1 | 2,71   | 0,024327 | 0,49362  |                          |
| TC0100003010.mm.1 | 2,3 Tmem163              | PSR0100024130.mm.1 | -2,02  | 0,011706 | 0,429969 | Alternative 3' Acce 0,29 |
| TC0100003010.mm.1 | 2,3 Tmem163              | PSR0100024142.mm.1 | -2,5   | 0,009888 | 0,418122 | Cassette Exon 0,18       |
| TC0100003010.mm.1 | 2,3 Tmem163              | PSR0100024129.mm.1 | -2,59  | 0,002668 | 0,349612 | Cassette Exon 0,27       |
| TC0100003010.mm.1 | 2,3 Tmem163              | PSR0100024143.mm.1 | -3,33  | 0,017719 | 0,465209 | Cassette Exon 0,18       |
| TC0100003010.mm.1 | 2,3 Tmem163              | JUC0100013677.mm.1 | -3,75  | 0,01574  | 0,455416 |                          |
| TC0100003010.mm.1 | 2,3 Tmem163              | JUC0100013669.mm.1 | -3,81  | 0,032012 | 0,518371 |                          |
| TC1900000386.mm.1 | 2,13 Apba1               | JUC1900001839.mm.1 | 3,94   | 0,002894 | 0,352207 |                          |
| TC1900000386.mm.1 | 2,13 Apba1               | PSR1900003596.mm.1 | -2,05  | 0,028932 | 0,508622 | Cassette Exon 0,16       |
| TC1900000386.mm.1 | 2,13 Apba1               | PSR1900003600.mm.1 | -2,33  | 0,01576  | 0,455437 | Cassette Exon 0,12       |
| TC1900000386.mm.1 | 2,13 Apba1               | JUC1900001836.mm.1 | -2,39  | 0,006633 | 0,392776 |                          |
| TC1900000386.mm.1 | 2,13 Apba1               | PSR1900003594.mm.1 | -2,46  | 0,004862 | 0,371692 | Cassette Exon 0,2        |
| TC1700001975.mm.1 | 1,25 Gtf2h4              | JUC1700010039.mm.1 | 3,94   | 0,035559 | 0,528789 |                          |
| TC1700001975.mm.1 | 1,25 Gtf2h4              | PSR1700018774.mm.1 | -2,19  | 0,040227 | 0,541714 | Alternative 3' Acce 0,11 |
| TC0700004084.mm.1 | 1,09 Scube2              | JUC0700017716.mm.1 | 3,94   | 0,007883 | 0,403723 |                          |
| TC0700004084.mm.1 | 1,09 Scube2              | JUC0700017724.mm.1 | -2,02  | 0,000857 | 0,311909 |                          |

|                   |                        |                    |       |          |                              |      |
|-------------------|------------------------|--------------------|-------|----------|------------------------------|------|
| TC0700004084.mm.1 | 1,09 Scube2            | JUC0700017720.mm.1 | -2,11 | 0,005385 | 0,378801                     |      |
| TC0700001669.mm.1 | 1,57 Pde3b             | JUC0700007173.mm.1 | 3,94  | 0,040132 | 0,541573                     |      |
| TC0200004920.mm.1 | 2,7 Dusp15             | PSR0200041715.mm.1 | 3,93  | 0,005676 | 0,382164 Cassette Exon       | 0,39 |
| TC0200004920.mm.1 | 2,7 Dusp15             | JUC0200021535.mm.1 | 3,2   | 0,030949 | 0,514624                     |      |
| TC0200004920.mm.1 | 2,7 Dusp15             | PSR0200041718.mm.1 | -2,19 | 0,039542 | 0,539764 Cassette Exon       | 0,11 |
| TC0200004920.mm.1 | 2,7 Dusp15             | PSR0200041708.mm.1 | -3,63 | 0,04046  | 0,542132 Intron Retention    | 0,6  |
| TC0200004920.mm.1 | 2,7 Dusp15             | PSR0200041710.mm.1 | -3,77 | 0,010121 | 0,41919 Alternative 5' Donc  | 0,42 |
| TC0200003884.mm.1 | 1,23 Rtn4rl2           | PSR0200033606.mm.1 | 3,93  | 0,018305 | 0,468049 Alternative 3' Acce | 0,45 |
| TC0400002407.mm.1 | 1,67 Lingo2            | JUC0400010177.mm.1 | 3,93  | 0,000548 | 0,304044                     |      |
| TC0400002407.mm.1 | 1,67 Lingo2            | JUC0400010179.mm.1 | 3,59  | 0,007379 | 0,39943                      |      |
| TC0400002407.mm.1 | 1,67 Lingo2            | PSR0400019537.mm.1 | 3,3   | 0,036308 | 0,530487 Cassette Exon       | 0,23 |
| TC0400002407.mm.1 | 1,67 Lingo2            | JUC0400010170.mm.1 | 2,62  | 0,049834 | 0,563773                     |      |
| TC0400002407.mm.1 | 1,67 Lingo2            | PSR0400019533.mm.1 | 2,2   | 0,003042 | 0,353892 Cassette Exon       | 0,13 |
| TC0400002407.mm.1 | 1,67 Lingo2            | PSR0400019547.mm.1 | -2,64 | 0,0391   | 0,538405 Alternative 5' Donc | 0,24 |
| TC0200003316.mm.1 | 1,38 Lrsam1            | JUC0200014281.mm.1 | 3,93  | 0,002867 | 0,352207                     |      |
| TC0200003316.mm.1 | 1,38 Lrsam1            | JUC0200014277.mm.1 | -2,19 | 0,00155  | 0,330631                     |      |
| TC0200003316.mm.1 | 1,38 Lrsam1            | PSR0200028296.mm.1 | -2,23 | 0,006076 | 0,386691 Cassette Exon       | 0,12 |
| TC1400001627.mm.1 | 1,01 Appl1             | JUC1400006631.mm.1 | 3,93  | 0,031737 | 0,517489                     |      |
| TC1400001627.mm.1 | 1,01 Appl1             | JUC1400006621.mm.1 | 2,47  | 0,036997 | 0,532502                     |      |
| TC0100002410.mm.1 | 1,03                   | JUC0100011186.mm.1 | 3,93  | 0,04372  | 0,550256                     |      |
| TC0800001731.mm.1 | 1,04                   | JUC0800007630.mm.1 | 3,93  | 0,047312 | 0,558289                     |      |
| TC1500000859.mm.1 | 1,03 Panx2             | JUC1500003786.mm.1 | 3,92  | 0,039529 | 0,539764                     |      |
| TC1500000859.mm.1 | 1,03 Panx2             | PSR1500006723.mm.1 | 2,97  | 0,038951 | 0,537876 Cassette Exon       | 0,31 |
| TC0600002965.mm.1 | -1,58 Plxnd1           | JUC0600011848.mm.1 | 3,92  | 0,010568 | 0,422432                     |      |
| TC0600002965.mm.1 | -1,58 Plxnd1           | JUC0600011829.mm.1 | 3,24  | 0,00075  | 0,308185                     |      |
| TC0600002965.mm.1 | -1,58 Plxnd1           | JUC0600011824.mm.1 | 2,52  | 0,00572  | 0,382767                     |      |
| TC0600002965.mm.1 | -1,58 Plxnd1           | PSR0600022808.mm.1 | 2,33  | 0,005853 | 0,383741 Alternative 3' Acce | 0,21 |
| TC0600002965.mm.1 | -1,58 Plxnd1           | PSR0600022815.mm.1 | 2,28  | 0,04315  | 0,548704 Cassette Exon       | 0,12 |
| TC0100002832.mm.1 | -1,15 Pask             | JUC0100013041.mm.1 | 3,92  | 0,016046 | 0,457283                     |      |
| TC1800001180.mm.1 | -1,41 Ecscr            | JUC1800004856.mm.1 | 3,92  | 0,010089 | 0,418998                     |      |
| TC1800001180.mm.1 | -1,41 Ecscr            | JUC1800004854.mm.1 | 3,39  | 0,042296 | 0,547224                     |      |
| TC1800001180.mm.1 | -1,41 Ecscr            | PSR1800008707.mm.1 | 2,53  | 0,00926  | 0,414559                     |      |
| TC1500001585.mm.1 | 1,43 Mtss1             | JUC1500006739.mm.1 | 3,92  | 0,020601 | 0,478531                     |      |
| TC0800001594.mm.1 | -1,4 Nrp1; Mir1903     | JUC0800007106.mm.1 | 3,92  | 0,037868 | 0,534872                     |      |
| TC0300001364.mm.1 | -1,21 Cenpe            | JUC0300005776.mm.1 | 3,92  | 0,002676 | 0,349612                     |      |
| TC1100003650.mm.1 | -1,02 Gm11613; Gm24158 | JUC1100017563.mm.1 | 3,92  | 0,048991 | 0,561849                     |      |
| TC1800000385.mm.1 | 1,92 RelI2             | PSR1800002920.mm.1 | 3,91  | 0,004545 | 0,368716 Cassette Exon       | 0,29 |
| TC1800000385.mm.1 | 1,92 RelI2             | JUC1800001621.mm.1 | 3,24  | 0,002037 | 0,341377                     |      |
| TC1800000385.mm.1 | 1,92 RelI2             | PSR1800002912.mm.1 | 2,36  | 0,003164 | 0,353901 Cassette Exon       | 0,23 |
| TC1800000385.mm.1 | 1,92 RelI2             | PSR1800002910.mm.1 | -2,05 | 0,001565 | 0,331411 Alternative 3' Acce | 0,12 |
| TC1800000385.mm.1 | 1,92 RelI2             | PSR1800002904.mm.1 | -2,22 | 0,046778 | 0,557017 Cassette Exon       | 0,23 |
| TC1800000385.mm.1 | 1,92 RelI2             | JUC1800001623.mm.1 | -2,33 | 0,011103 | 0,426                        |      |
| TC1800000385.mm.1 | 1,92 RelI2             | PSR1800002913.mm.1 | -2,87 | 0,014963 | 0,452048 Intron Retention    | 0,37 |
| TC1800000385.mm.1 | 1,92 RelI2             | PSR1800002895.mm.1 | -2,94 | 0,001286 | 0,322384 Alternative 3' Acce | 0,27 |
| TC1800000385.mm.1 | 1,92 RelI2             | JUC1800001624.mm.1 | -3,62 | 0,025245 | 0,496939                     |      |
| TC1800000385.mm.1 | 1,92 RelI2             | JUC1800001618.mm.1 | -3,67 | 0,012352 | 0,434601                     |      |
| TC1700000612.mm.1 | -1,06 Col11a2          | JUC1700003188.mm.1 | 3,91  | 0,024751 | 0,494905                     |      |
| TC1000002646.mm.1 | -1,87 Mybpc1           | JUC1000010981.mm.1 | 3,91  | 0,036926 | 0,532327                     |      |

|                   |                     |                    |       |          |                              |      |
|-------------------|---------------------|--------------------|-------|----------|------------------------------|------|
| TC1000002646.mm.1 | -1,87 Mybpc1        | JUC1000010968.mm.1 | -2,14 | 0,028663 | 0,507969                     |      |
| TC1100001524.mm.1 | 1,13 Prr15l         | PSR1100014019.mm.1 | 3,89  | 0,021967 | 0,485125 Alternative 3' Acce | 0,46 |
| TC0800002393.mm.1 | 3,55 Tmem59l        | PSR0800018139.mm.1 | 3,89  | 0,002048 | 0,341391 Cassette Exon       | 0,29 |
| TC0800002393.mm.1 | 3,55 Tmem59l        | JUC0800009847.mm.1 | 3,01  | 0,009684 | 0,417605                     |      |
| TC0800002393.mm.1 | 3,55 Tmem59l        | JUC0800009851.mm.1 | -2,1  | 0,039917 | 0,540953                     |      |
| TC0800002393.mm.1 | 3,55 Tmem59l        | PSR0800018142.mm.1 | -2,67 | 0,017286 | 0,463143 Cassette Exon       | 0,2  |
| TC1600000218.mm.1 | -1,02 Aifm3         | JUC1600000928.mm.1 | 3,89  | 0,047907 | 0,55942                      |      |
| TC1600000218.mm.1 | -1,02 Aifm3         | JUC1600000925.mm.1 | 2,24  | 0,017579 | 0,464264                     |      |
| TC0400001139.mm.1 | 4,19 Slc1a7         | JUC0400004153.mm.1 | 3,88  | 0,000137 | 0,270987                     |      |
| TC0400001139.mm.1 | 4,19 Slc1a7         | JUC0400004154.mm.1 | 2,8   | 0,002147 | 0,343679                     |      |
| TC0400001139.mm.1 | 4,19 Slc1a7         | PSR0400008024.mm.1 | 2,01  | 0,007958 | 0,403853 Cassette Exon       | 0,11 |
| TC0400001139.mm.1 | 4,19 Slc1a7         | PSR0400008029.mm.1 | -5,45 | 0,000755 | 0,308387 Alternative 3' Acce | 0,46 |
| TC0900001695.mm.1 | 2,87 Gria4; Gm23811 | JUC0900008049.mm.1 | 3,88  | 0,01444  | 0,449008                     |      |
| TC0900001695.mm.1 | 2,87 Gria4; Gm23811 | PSR0900014327.mm.1 | 3,82  | 0,014957 | 0,451983 Cassette Exon       | 0,35 |
| TC0900001695.mm.1 | 2,87 Gria4; Gm23811 | JUC0900008051.mm.1 | 2,92  | 0,00497  | 0,373851                     |      |
| TC0900001695.mm.1 | 2,87 Gria4; Gm23811 | PSR0900014326.mm.1 | 2,14  | 0,000517 | 0,303623 Cassette Exon       | 0,26 |
| TC0900001695.mm.1 | 2,87 Gria4; Gm23811 | PSR0900014333.mm.1 | -2,02 | 0,003629 | 0,3566 Cassette Exon         | 0,13 |
| TC0900001695.mm.1 | 2,87 Gria4; Gm23811 | PSR0900014313.mm.1 | -2,08 | 0,005699 | 0,382524 Cassette Exon       | 0,17 |
| TC0900001695.mm.1 | 2,87 Gria4; Gm23811 | PSR0900014314.mm.1 | -2,38 | 0,012394 | 0,434939 Cassette Exon       | 0,21 |
| TC0900001695.mm.1 | 2,87 Gria4; Gm23811 | JUC0900008055.mm.1 | -2,52 | 0,041132 | 0,543971                     |      |
| TC0900001695.mm.1 | 2,87 Gria4; Gm23811 | PSR0900014316.mm.1 | -2,61 | 0,003492 | 0,355638                     |      |
| TC0900001695.mm.1 | 2,87 Gria4; Gm23811 | PSR0900014334.mm.1 | -2,91 | 0,006616 | 0,392269 Alternative 5' Donc | 0,14 |
| TC0900001695.mm.1 | 2,87 Gria4; Gm23811 | JUC0900008045.mm.1 | -9,38 | 0,035498 | 0,528724                     |      |
| TC1400001906.mm.1 | 1,47 Ddhd1; Mir5131 | JUC1400007923.mm.1 | 3,88  | 0,006516 | 0,391382                     |      |
| TC1400001906.mm.1 | 1,47 Ddhd1; Mir5131 | JUC1400007926.mm.1 | 2,46  | 0,034278 | 0,525322                     |      |
| TC1400001906.mm.1 | 1,47 Ddhd1; Mir5131 | PSR1400014431.mm.1 | 2,41  | 0,00055  | 0,304044 Cassette Exon       | 0,25 |
| TC1400001906.mm.1 | 1,47 Ddhd1; Mir5131 | PSR1400014429.mm.1 | -2,12 | 0,004478 | 0,367858 Alternative 5' Donc | 0,2  |
| TC1400001906.mm.1 | 1,47 Ddhd1; Mir5131 | JUC1400007911.mm.1 | -2,26 | 0,010372 | 0,421273                     |      |
| TC1400001906.mm.1 | 1,47 Ddhd1; Mir5131 | PSR1400014444.mm.1 | -3,06 | 0,009313 | 0,414883 Alternative 5' Donc | 0,28 |
| TC0300000647.mm.1 | -3,09 Sfrp2         | JUC0300002242.mm.1 | 3,88  | 0,020314 | 0,477245                     |      |
| TC0300000647.mm.1 | -3,09 Sfrp2         | PSR0300004292.mm.1 | 2,79  | 0,011356 | 0,427374 Alternative 3' Acce | 0,27 |
| TC0500000642.mm.1 | 1,03 Limch1         | JUC0500003115.mm.1 | 3,88  | 0,001143 | 0,317344                     |      |
| TC0500000642.mm.1 | 1,03 Limch1         | PSR0500005662.mm.1 | 2,07  | 0,033917 | 0,52424 Cassette Exon        | 0,09 |
| TC0500000642.mm.1 | 1,03 Limch1         | PSR0500005645.mm.1 | 2,04  | 0,010972 | 0,42518 Cassette Exon        | 0,27 |
| TC0200002482.mm.1 | 1,69 Tox2           | JUC0200010298.mm.1 | 3,88  | 0,039591 | 0,539898                     |      |
| TC0200002482.mm.1 | 1,69 Tox2           | JUC0200010301.mm.1 | 2,47  | 0,018604 | 0,469657                     |      |
| TC0100002950.mm.1 | 1,19 Epb4.1l5       | JUC0100013440.mm.1 | 3,88  | 0,006855 | 0,393968                     |      |
| TC0100002950.mm.1 | 1,19 Epb4.1l5       | JUC0100013435.mm.1 | 2,44  | 0,018722 | 0,470679                     |      |
| TC0600001342.mm.1 | -1,4 Ninj2          | PSR0600010667.mm.1 | 3,87  | 0,000526 | 0,304044 Alternative 3' Acce | 0,46 |
| TC0600001852.mm.1 | 1,74 lca1           | PSR0600014623.mm.1 | 3,87  | 0,00154  | 0,330388 Alternative 3' Acce | 0,39 |
| TC0600001852.mm.1 | 1,74 lca1           | JUC0600007648.mm.1 | 2,18  | 0,020663 | 0,478862                     |      |
| TC0600001852.mm.1 | 1,74 lca1           | PSR0600014619.mm.1 | -2,01 | 0,025565 | 0,497808 Cassette Exon       | 0,11 |
| TC0600001852.mm.1 | 1,74 lca1           | PSR0600014603.mm.1 | -2,13 | 0,029872 | 0,511209 Cassette Exon       | 0,1  |
| TC0600001852.mm.1 | 1,74 lca1           | JUC0600007658.mm.1 | -2,86 | 0,040181 | 0,541655                     |      |
| TC0600001852.mm.1 | 1,74 lca1           | JUC0600007664.mm.1 | -3,46 | 0,001721 | 0,335996                     |      |
| TC0600001852.mm.1 | 1,74 lca1           | JUC0600007657.mm.1 | -3,62 | 0,021872 | 0,484657                     |      |
| TC0600001852.mm.1 | 1,74 lca1           | JUC0600007660.mm.1 | -6,25 | 0,001151 | 0,317344                     |      |
| TC0900001739.mm.1 | 1,17 Cntrn5         | PSR0900014679.mm.1 | 3,87  | 0,00386  | 0,358861 Cassette Exon       | 0,27 |

|                   |                    |                     |       |          |                              |      |
|-------------------|--------------------|---------------------|-------|----------|------------------------------|------|
| TC0900001739.mm.1 | 1,17 Cntn5         | PSR0900014680.mm.1  | 3,01  | 0,027676 | 0,504734 Cassette Exon       | 0,23 |
| TC0900001739.mm.1 | 1,17 Cntn5         | PSR0900014682.mm.1  | 2,89  | 0,046789 | 0,557037 Cassette Exon       | 0,18 |
| TC0900001739.mm.1 | 1,17 Cntn5         | PSR0900014677.mm.1  | 2,76  | 0,004284 | 0,363973 Cassette Exon       | 0,29 |
| TC0900001739.mm.1 | 1,17 Cntn5         | PSR0900014676.mm.1  | 2,5   | 0,003675 | 0,357266 Cassette Exon       | 0,21 |
| TC0900001739.mm.1 | 1,17 Cntn5         | JUC0900008265.mm.1  | -2,1  | 0,045037 | 0,553049                     |      |
| TC0900001739.mm.1 | 1,17 Cntn5         | JUC0900008268.mm.1  | -2,77 | 0,019611 | 0,474765                     |      |
| TC0900001739.mm.1 | 1,17 Cntn5         | JUC0900008272.mm.1  | -3,97 | 0,00285  | 0,352207                     |      |
| TC1800001402.mm.1 | -2,13 Synpo        | JUC1800005660.mm.1  | 3,87  | 0,049548 | 0,563325                     |      |
| TC0100001734.mm.1 | 1,13 Cnih3         | JUC0100008150.mm.1  | 3,87  | 0,010182 | 0,419711                     |      |
| TC0500002687.mm.1 | -1,16 Tmprss11e    | JUC0500012919.mm.1  | 3,87  | 0,034237 | 0,525168                     |      |
| TC0900000567.mm.1 | -1,25              | JUC0900002076.mm.1  | 3,87  | 0,010741 | 0,423772                     |      |
| TC0600000839.mm.1 | -1,18 Polr1a       | JUC0600003229.mm.1  | 3,87  | 0,017506 | 0,463964                     |      |
| TC0700001521.mm.1 | -1,18 Grm15133     | JUC0700006651.mm.1  | 3,87  | 0,01404  | 0,44654                      |      |
| TC0900001879.mm.1 | -1,16 Yipf2        | JUC0900008896.mm.1  | 3,86  | 0,001211 | 0,322251                     |      |
| TC0900001879.mm.1 | -1,16 Yipf2        | JUC0900008895.mm.1  | 3,16  | 0,023991 | 0,492783                     |      |
| TC0900001879.mm.1 | -1,16 Yipf2        | PSR0900015780.mm.1  | 2,19  | 0,013847 | 0,445385 Cassette Exon       | 0,2  |
| TC0400003650.mm.1 | 1,42 Ptpru         | JUC0400015552.mm.1  | 3,86  | 0,014715 | 0,45037                      |      |
| TC0400003650.mm.1 | 1,42 Ptpru         | JUC0400015556.mm.1  | 2,61  | 0,015734 | 0,455416                     |      |
| TC0400003650.mm.1 | 1,42 Ptpru         | JUC0400015547.mm.1  | 2,14  | 0,004726 | 0,370888                     |      |
| TC0400003650.mm.1 | 1,42 Ptpru         | JUC0400015523.mm.1  | 2,06  | 0,003099 | 0,353892                     |      |
| TC0400003650.mm.1 | 1,42 Ptpru         | PSR0400029818.mm.1  | -2,13 | 0,012746 | 0,436784 Cassette Exon       | 0,11 |
| TC0400003650.mm.1 | 1,42 Ptpru         | PSR0400029839.mm.1  | -2,16 | 0,048531 | 0,560991 Alternative 5' Donc | 0,14 |
| TC0400003650.mm.1 | 1,42 Ptpru         | PSR0400029810.mm.1  | -2,28 | 0,018117 | 0,467161 Alternative 3' Acce | 0,16 |
| TC0400003650.mm.1 | 1,42 Ptpru         | JUC0400015555.mm.1  | -2,73 | 0,022587 | 0,487325                     |      |
| TC0400003650.mm.1 | 1,42 Ptpru         | JUC0400015544.mm.1  | -3,15 | 0,034177 | 0,524992                     |      |
| TC0800000814.mm.1 | -1,49 Tpm4         | JUC0800003161.mm.1  | 3,86  | 0,007814 | 0,403089                     |      |
| TC0900003172.mm.1 | 1 Cnot10           | JUC09000015110.mm.1 | 3,86  | 0,003882 | 0,359196                     |      |
| TC0900003172.mm.1 | 1 Cnot10           | JUC0900015106.mm.1  | 2,13  | 0,020446 | 0,478018                     |      |
| TC0900003172.mm.1 | 1 Cnot10           | JUC0900015107.mm.1  | 2,08  | 0,039271 | 0,538976                     |      |
| TC0400003881.mm.1 | -1,08 Clcnkb       | JUC0400016730.mm.1  | 3,86  | 0,00476  | 0,371039                     |      |
| TC1000001124.mm.1 | -1,12 Cdk17        | JUC1000004549.mm.1  | 3,86  | 0,002156 | 0,344024                     |      |
| TC1000001124.mm.1 | -1,12 Cdk17        | JUC1000004541.mm.1  | 2,15  | 0,020068 | 0,476558                     |      |
| TC0700000866.mm.1 | -1,65              | PSR0700007659.mm.1  | 3,85  | 0,022887 | 0,488524 Cassette Exon       | 0,28 |
| TC1100000908.mm.1 | 2,55 Kcnab3        | PSR1100007699.mm.1  | 3,85  | 0,000119 | 0,269605 Cassette Exon       | 0,26 |
| TC1100000908.mm.1 | 2,55 Kcnab3        | JUC1100004053.mm.1  | -2,42 | 0,0022   | 0,345178                     |      |
| TC1100000908.mm.1 | 2,55 Kcnab3        | PSR1100007685.mm.1  | -2,67 | 0,019731 | 0,474922 Cassette Exon       | 0,15 |
| TC1100000908.mm.1 | 2,55 Kcnab3        | PSR1100007692.mm.1  | -2,75 | 0,024805 | 0,495221 Alternative 3' Acce | 0,25 |
| TC1100000908.mm.1 | 2,55 Kcnab3        | PSR1100007686.mm.1  | -2,79 | 0,02604  | 0,49952 Cassette Exon        | 0,16 |
| TC0600000044.mm.1 | 2,22 Tac1          | JUC0600000236.mm.1  | 3,85  | 0,008887 | 0,410717                     |      |
| TC0600000044.mm.1 | 2,22 Tac1          | PSR0600000414.mm.1  | 2,21  | 0,007018 | 0,395834 Cassette Exon       | 0,24 |
| TC0600000044.mm.1 | 2,22 Tac1          | PSR0600000404.mm.1  | -2,01 | 0,033856 | 0,524049 Cassette Exon       | 0,1  |
| TC0600000044.mm.1 | 2,22 Tac1          | PSR0600000422.mm.1  | -2,08 | 0,039972 | 0,540973 Cassette Exon       | 0,12 |
| TC0600000044.mm.1 | 2,22 Tac1          | PSR0600000407.mm.1  | -2,14 | 0,039453 | 0,539705 Cassette Exon       | 0,11 |
| TC0600000044.mm.1 | 2,22 Tac1          | PSR0600000409.mm.1  | -2,43 | 0,022365 | 0,48639 Cassette Exon        | 0,06 |
| TC0600000044.mm.1 | 2,22 Tac1          | PSR0600000423.mm.1  | -2,53 | 0,022636 | 0,487464 Cassette Exon       | 0,12 |
| TC0600000044.mm.1 | 2,22 Tac1          | JUC0600000242.mm.1  | -4,26 | 0,013964 | 0,446239                     |      |
| TC1600001978.mm.1 | -1,15 LOC102635020 | JUC1600007905.mm.1  | 3,85  | 0,00062  | 0,304044                     |      |
| TC1400001078.mm.1 | 2,07 Enox1         | JUC1400004654.mm.1  | 3,84  | 0,008187 | 0,40568                      |      |

|                   |                     |                    |        |          |          |                     |      |
|-------------------|---------------------|--------------------|--------|----------|----------|---------------------|------|
| TC1400001078.mm.1 | 2,07 Enox1          | JUC1400004644.mm.1 | 3,63   | 0,021175 | 0,480978 |                     |      |
| TC1400001078.mm.1 | 2,07 Enox1          | PSR1400008690.mm.1 | 3,34   | 0,02978  | 0,511132 | Cassette Exon       | 0,39 |
| TC1400001078.mm.1 | 2,07 Enox1          | JUC1400004652.mm.1 | 3,13   | 0,008987 | 0,411965 |                     |      |
| TC1400001078.mm.1 | 2,07 Enox1          | PSR1400008691.mm.1 | 2,71   | 0,003254 | 0,354243 | Cassette Exon       | 0,29 |
| TC1400001078.mm.1 | 2,07 Enox1          | PSR1400008673.mm.1 | -2,14  | 0,043053 | 0,54841  | Cassette Exon       | 0,08 |
| TC1400001078.mm.1 | 2,07 Enox1          | PSR1400008666.mm.1 | -2,26  | 0,033037 | 0,521501 | Cassette Exon       | 0,12 |
| TC1400001078.mm.1 | 2,07 Enox1          | PSR1400008665.mm.1 | -2,39  | 0,003007 | 0,353447 | Cassette Exon       | 0,13 |
| TC1400001078.mm.1 | 2,07 Enox1          | JUC1400004637.mm.1 | -2,59  | 0,049797 | 0,563698 |                     |      |
| TC1400001078.mm.1 | 2,07 Enox1          | JUC1400004656.mm.1 | -2,72  | 0,000221 | 0,28803  |                     |      |
| TC1400001078.mm.1 | 2,07 Enox1          | JUC1400004655.mm.1 | -2,77  | 0,002689 | 0,349612 |                     |      |
| TC0100001688.mm.1 | 1,21 Efcab2         | JUC0100007919.mm.1 | 3,84   | 0,002473 | 0,349135 |                     |      |
| TC1900000859.mm.1 | -1,77 E330013P04Rik | JUC1900004072.mm.1 | 3,84   | 0,02626  | 0,500386 |                     |      |
| TC1900000859.mm.1 | -1,77 E330013P04Rik | PSR1900007412.mm.1 | 2,04   | 0,046521 | 0,556739 |                     |      |
| TC1100001272.mm.1 | 1,1 Ddx52           | JUC1100006245.mm.1 | 3,84   | 0,002697 | 0,349612 |                     |      |
| TC1100000937.mm.1 | 5,82 Dlg4           | JUC1100004261.mm.1 | 3,83   | 0,019576 | 0,474672 |                     |      |
| TC1100000937.mm.1 | 5,82 Dlg4           | JUC1100004257.mm.1 | 2,7    | 0,002003 | 0,341091 |                     |      |
| TC1100000937.mm.1 | 5,82 Dlg4           | JUC1100004262.mm.1 | 2,65   | 0,012774 | 0,437233 |                     |      |
| TC1100000937.mm.1 | 5,82 Dlg4           | PSR1100008160.mm.1 | 2,18   | 0,022551 | 0,487281 | Cassette Exon       | 0,22 |
| TC1100000937.mm.1 | 5,82 Dlg4           | JUC1100004267.mm.1 | -2,38  | 0,043115 | 0,54862  |                     |      |
| TC1100000937.mm.1 | 5,82 Dlg4           | JUC1100004269.mm.1 | -2,76  | 0,008418 | 0,406611 |                     |      |
| TC1100000937.mm.1 | 5,82 Dlg4           | PSR1100008136.mm.1 | -2,95  | 0,010912 | 0,424587 |                     |      |
| TC1100000937.mm.1 | 5,82 Dlg4           | PSR1100008133.mm.1 | -2,98  | 0,02974  | 0,511108 | Cassette Exon       | 0,2  |
| TC1100000937.mm.1 | 5,82 Dlg4           | PSR1100008126.mm.1 | -3,23  | 0,026285 | 0,50053  | Cassette Exon       | 0,29 |
| TC1100000937.mm.1 | 5,82 Dlg4           | PSR1100008134.mm.1 | -4,22  | 0,001435 | 0,327493 |                     |      |
| TC1100000937.mm.1 | 5,82 Dlg4           | JUC1100004270.mm.1 | -4,3   | 0,029473 | 0,510123 |                     |      |
| TC1100000937.mm.1 | 5,82 Dlg4           | JUC1100004247.mm.1 | -4,32  | 0,011793 | 0,430163 |                     |      |
| TC1100000937.mm.1 | 5,82 Dlg4           | JUC1100004272.mm.1 | -4,35  | 0,007489 | 0,400686 |                     |      |
| TC1100000937.mm.1 | 5,82 Dlg4           | JUC1100004265.mm.1 | -4,54  | 0,001696 | 0,335395 |                     |      |
| TC1100000937.mm.1 | 5,82 Dlg4           | PSR1100008142.mm.1 | -4,7   | 0,030607 | 0,51348  | Cassette Exon       | 0,34 |
| TC1100000937.mm.1 | 5,82 Dlg4           | PSR1100008158.mm.1 | -4,87  | 0,002098 | 0,342919 | Cassette Exon       | 0,31 |
| TC1100000937.mm.1 | 5,82 Dlg4           | PSR1100008167.mm.1 | -4,99  | 0,002968 | 0,352501 | Alternative 3' Acce | 0,46 |
| TC1100000937.mm.1 | 5,82 Dlg4           | PSR1100008135.mm.1 | -5,97  | 0,002984 | 0,352501 | Cassette Exon       | 0,41 |
| TC1100000937.mm.1 | 5,82 Dlg4           | PSR1100008130.mm.1 | -6,09  | 0,006179 | 0,387873 | Cassette Exon       | 0,3  |
| TC1100000937.mm.1 | 5,82 Dlg4           | PSR1100008138.mm.1 | -6,51  | 0,003718 | 0,357586 | Cassette Exon       | 0,41 |
| TC1100000937.mm.1 | 5,82 Dlg4           | PSR1100008123.mm.1 | -6,99  | 0,000899 | 0,313363 | Cassette Exon       | 0,41 |
| TC1100000937.mm.1 | 5,82 Dlg4           | PSR1100008129.mm.1 | -8,45  | 0,003053 | 0,353892 | Cassette Exon       | 0,3  |
| TC1100000937.mm.1 | 5,82 Dlg4           | PSR1100008146.mm.1 | -8,68  | 0,003683 | 0,357266 | Intron Retention    | 0,73 |
| TC1100000937.mm.1 | 5,82 Dlg4           | JUC1100004273.mm.1 | -9,36  | 0,004832 | 0,371555 |                     |      |
| TC1100000937.mm.1 | 5,82 Dlg4           | PSR1100008132.mm.1 | -10,65 | 0,000896 | 0,313363 | Cassette Exon       | 0,38 |
| TC1100000937.mm.1 | 5,82 Dlg4           | JUC1100004274.mm.1 | -12,28 | 0,005362 | 0,378627 |                     |      |
| TC0700000800.mm.1 | 1,73 Shank1         | JUC0700003262.mm.1 | 3,83   | 0,037221 | 0,533311 |                     |      |
| TC0700000800.mm.1 | 1,73 Shank1         | PSR0700006533.mm.1 | -2,14  | 0,026526 | 0,501411 | Cassette Exon       | 0,12 |
| TC0700000800.mm.1 | 1,73 Shank1         | JUC0700003259.mm.1 | -2,32  | 0,045843 | 0,555021 |                     |      |
| TC0700000800.mm.1 | 1,73 Shank1         | PSR0700006542.mm.1 | -2,34  | 0,041789 | 0,545586 | Cassette Exon       | 0,17 |
| TC0700000800.mm.1 | 1,73 Shank1         | PSR0700006530.mm.1 | -2,45  | 0,011653 | 0,429904 | Cassette Exon       | 0,13 |
| TC0700000800.mm.1 | 1,73 Shank1         | PSR0700006548.mm.1 | -2,84  | 0,027374 | 0,503961 | Cassette Exon       | 0,13 |
| TC0700000800.mm.1 | 1,73 Shank1         | PSR0700006565.mm.1 | -3,42  | 0,0043   | 0,364027 | Cassette Exon       | 0,24 |
| TC1300002498.mm.1 | 1,01 Arhgef28       | JUC1300008866.mm.1 | 3,83   | 0,042545 | 0,547918 |                     |      |

|                   |                     |                    |       |          |                              |      |
|-------------------|---------------------|--------------------|-------|----------|------------------------------|------|
| TC1300002498.mm.1 | 1,01 Arhgef28       | JUC1300008883.mm.1 | 3,13  | 0,024531 | 0,493992                     |      |
| TC1300002498.mm.1 | 1,01 Arhgef28       | JUC1300008898.mm.1 | 3,06  | 0,005976 | 0,386059                     |      |
| TC1300002498.mm.1 | 1,01 Arhgef28       | JUC1300008892.mm.1 | 2,73  | 0,011208 | 0,426683                     |      |
| TC1100001176.mm.1 | 1,49 Nf1            | JUC1100005753.mm.1 | 3,83  | 0,007885 | 0,403754                     |      |
| TC1100001176.mm.1 | 1,49 Nf1            | JUC1100005775.mm.1 | 3,76  | 0,008064 | 0,40448                      |      |
| TC1100003455.mm.1 | 1,13 Cltc           | JUC1100016614.mm.1 | 3,83  | 0,043583 | 0,550052                     |      |
| TC1100003455.mm.1 | 1,13 Cltc           | JUC1100016613.mm.1 | 3,8   | 0,02483  | 0,495379                     |      |
| TC1200000887.mm.1 | -1,27 Gm2042        | PSR1200006477.mm.1 | 3,82  | 0,002898 | 0,352207 Alternative 3' Acce | 0,45 |
| TC0500000021.mm.1 | 1,17 Akap9          | PSR0500000269.mm.1 | 3,82  | 0,03374  | 0,523558 Alternative 5' Donc | 0,41 |
| TC0500000021.mm.1 | 1,17 Akap9          | JUC0500000118.mm.1 | 2,33  | 0,018653 | 0,470078                     |      |
| TC0500000021.mm.1 | 1,17 Akap9          | JUC0500000113.mm.1 | -2,11 | 0,028069 | 0,505989                     |      |
| TC0500000021.mm.1 | 1,17 Akap9          | PSR0500000220.mm.1 | -3,06 | 0,024336 | 0,49362 Alternative 3' Acce  | 0,17 |
| TC0500001860.mm.1 | 1,15 Fry            | JUC0500009352.mm.1 | 3,82  | 0,035789 | 0,529153                     |      |
| TC0500001860.mm.1 | 1,15 Fry            | JUC0500009309.mm.1 | 2,07  | 0,012938 | 0,438537                     |      |
| TC0500001860.mm.1 | 1,15 Fry            | PSR0500017182.mm.1 | -2,15 | 0,008247 | 0,405976 Alternative 5' Donc | 0,1  |
| TC0900000465.mm.1 | -1,98 3110039I08Rik | JUC0900001580.mm.1 | 3,82  | 0,012154 | 0,432923                     |      |
| TC0900000465.mm.1 | -1,98 3110039I08Rik | PSR0900003096.mm.1 | 2,01  | 0,001788 | 0,336311 Cassette Exon       | 0,09 |
| TC1400002764.mm.1 | 1,72 Fgf14          | JUC1400011420.mm.1 | 3,82  | 0,001281 | 0,322251                     |      |
| TC1400002764.mm.1 | 1,72 Fgf14          | JUC1400011425.mm.1 | -3,62 | 0,008679 | 0,408815                     |      |
| TC1400002764.mm.1 | 1,72 Fgf14          | JUC1400011423.mm.1 | -4,94 | 0,007312 | 0,398848                     |      |
| TC0700000864.mm.1 | 1,71 Lmtk3          | PSR0700007627.mm.1 | 3,81  | 0,00341  | 0,355242 Cassette Exon       | 0,32 |
| TC0700000864.mm.1 | 1,71 Lmtk3          | JUC0700003763.mm.1 | 2,37  | 0,001522 | 0,330287                     |      |
| TC0700000864.mm.1 | 1,71 Lmtk3          | JUC0700003765.mm.1 | 2,02  | 0,009461 | 0,416514                     |      |
| TC0700000864.mm.1 | 1,71 Lmtk3          | PSR0700007648.mm.1 | -2,18 | 0,025943 | 0,499144 Cassette Exon       | 0,12 |
| TC0700000864.mm.1 | 1,71 Lmtk3          | PSR0700007613.mm.1 | -2,23 | 0,004166 | 0,3623 Alternative 3' Acce   | 0,1  |
| TC0700000864.mm.1 | 1,71 Lmtk3          | JUC0700003780.mm.1 | -4,23 | 0,001524 | 0,330287                     |      |
| TC0400003870.mm.1 | 1,47 Crocc          | JUC0400016658.mm.1 | 3,81  | 0,015608 | 0,455078                     |      |
| TC0400003870.mm.1 | 1,47 Crocc          | JUC0400016655.mm.1 | 2,61  | 0,015884 | 0,456526                     |      |
| TC0400003870.mm.1 | 1,47 Crocc          | PSR0400031980.mm.1 | 2,45  | 0,005802 | 0,383104 Cassette Exon       | 0,14 |
| TC0400003870.mm.1 | 1,47 Crocc          | PSR0400031955.mm.1 | -2,01 | 0,021408 | 0,482126 Intron Retention    | 0,25 |
| TC0400003870.mm.1 | 1,47 Crocc          | JUC0400016648.mm.1 | -2,1  | 0,009248 | 0,414515                     |      |
| TC0400003870.mm.1 | 1,47 Crocc          | PSR0400031966.mm.1 | -2,39 | 0,00103  | 0,316361 Cassette Exon       | 0,15 |
| TC0400003870.mm.1 | 1,47 Crocc          | JUC0400016638.mm.1 | -2,77 | 0,00384  | 0,358714                     |      |
| TC0400003870.mm.1 | 1,47 Crocc          | JUC0400016654.mm.1 | -2,97 | 0,021205 | 0,48113                      |      |
| TC0900002919.mm.1 | -1,02 4930422M22Rik | JUC0900013423.mm.1 | 3,81  | 0,007081 | 0,396891                     |      |
| TC1200000899.mm.1 | 4,63 Nrnx3          | JUC1200003684.mm.1 | 3,8   | 0,000882 | 0,312293                     |      |
| TC1200000899.mm.1 | 4,63 Nrnx3          | PSR1200006571.mm.1 | 3,79  | 0,005309 | 0,378059 Cassette Exon       | 0,38 |
| TC1200000899.mm.1 | 4,63 Nrnx3          | JUC1200003681.mm.1 | 3,67  | 0,018397 | 0,468484                     |      |
| TC1200000899.mm.1 | 4,63 Nrnx3          | JUC1200003670.mm.1 | 3,6   | 0,002831 | 0,352207                     |      |
| TC1200000899.mm.1 | 4,63 Nrnx3          | JUC1200003687.mm.1 | 3,5   | 0,004513 | 0,368648                     |      |
| TC1200000899.mm.1 | 4,63 Nrnx3          | JUC1200003675.mm.1 | 3,46  | 0,009747 | 0,417839                     |      |
| TC1200000899.mm.1 | 4,63 Nrnx3          | PSR1200006572.mm.1 | 3,37  | 0,000448 | 0,297771 Mutually Exclusive  | 0,54 |
| TC1200000899.mm.1 | 4,63 Nrnx3          | JUC1200003686.mm.1 | 3,33  | 0,002399 | 0,348564                     |      |
| TC1200000899.mm.1 | 4,63 Nrnx3          | JUC1200003685.mm.1 | 2,73  | 0,041007 | 0,543644                     |      |
| TC1200000899.mm.1 | 4,63 Nrnx3          | PSR1200006591.mm.1 | 2,51  | 0,00946  | 0,416514                     |      |
| TC1200000899.mm.1 | 4,63 Nrnx3          | PSR1200006559.mm.1 | 2,05  | 0,011621 | 0,429746 Alternative 3' Acce | 0,13 |
| TC1200000899.mm.1 | 4,63 Nrnx3          | PSR1200006557.mm.1 | -2,01 | 0,020753 | 0,479248 Cassette Exon       | 0,25 |
| TC1200000899.mm.1 | 4,63 Nrnx3          | PSR1200006545.mm.1 | -2,36 | 0,014167 | 0,447466                     |      |



|                   |              |                    |        |          |          |                     |      |
|-------------------|--------------|--------------------|--------|----------|----------|---------------------|------|
| TC1200000899.mm.1 | 4,63 Nrnx3   | PSR1200006584.mm.1 | -2,79  | 0,003936 | 0,359818 | Cassette Exon       | 0,3  |
| TC1200000899.mm.1 | 4,63 Nrnx3   | PSR1200006581.mm.1 | -2,89  | 0,001342 | 0,325349 | Cassette Exon       | 0,27 |
| TC1200000899.mm.1 | 4,63 Nrnx3   | JUC1200003704.mm.1 | -3,01  | 0,021157 | 0,480912 |                     |      |
| TC1200000899.mm.1 | 4,63 Nrnx3   | PSR1200006574.mm.1 | -3,99  | 0,000384 | 0,293869 | Mutually Exclusive  | 0,54 |
| TC1200000899.mm.1 | 4,63 Nrnx3   | PSR1200006542.mm.1 | -4,5   | 0,000855 | 0,311909 | Cassette Exon       | 0,45 |
| TC1200000899.mm.1 | 4,63 Nrnx3   | PSR1200006552.mm.1 | -4,89  | 0,000318 | 0,288663 | Alternative 5' Donc | 0,54 |
| TC1200000899.mm.1 | 4,63 Nrnx3   | JUC1200003699.mm.1 | -5,08  | 0,010037 | 0,41878  |                     |      |
| TC1200000899.mm.1 | 4,63 Nrnx3   | PSR1200006553.mm.1 | -5,56  | 0,000503 | 0,303022 | Cassette Exon       | 0,41 |
| TC1200000899.mm.1 | 4,63 Nrnx3   | JUC1200003689.mm.1 | -6,1   | 0,001927 | 0,34017  |                     |      |
| TC1200000899.mm.1 | 4,63 Nrnx3   | PSR1200006563.mm.1 | -6,43  | 0,015102 | 0,452453 | Alternative 5' Donc | 0,35 |
| TC1200000899.mm.1 | 4,63 Nrnx3   | PSR1200006556.mm.1 | -7,83  | 0,003769 | 0,357586 | Cassette Exon       | 0,55 |
| TC1200000899.mm.1 | 4,63 Nrnx3   | PSR1200006589.mm.1 | -8,96  | 0,0002   | 0,28803  |                     |      |
| TC1200000899.mm.1 | 4,63 Nrnx3   | PSR1200006555.mm.1 | -9,06  | 0,001227 | 0,322251 | Cassette Exon       | 0,41 |
| TC1200000899.mm.1 | 4,63 Nrnx3   | JUC1200003701.mm.1 | -10,22 | 0,008956 | 0,411476 |                     |      |
| TC1200000899.mm.1 | 4,63 Nrnx3   | JUC1200003697.mm.1 | -10,32 | 0,000757 | 0,308387 |                     |      |
| TC1200000899.mm.1 | 4,63 Nrnx3   | JUC1200003706.mm.1 | -10,43 | 0,001562 | 0,331357 |                     |      |
| TC1200000899.mm.1 | 4,63 Nrnx3   | PSR1200006540.mm.1 | -11,21 | 0,000251 | 0,28803  | Alternative 3' Acce | 0,48 |
| TC1200000899.mm.1 | 4,63 Nrnx3   | JUC1200003702.mm.1 | -11,35 | 0,013416 | 0,442624 |                     |      |
| TC1200000899.mm.1 | 4,63 Nrnx3   | JUC1200003676.mm.1 | -11,37 | 0,007815 | 0,403089 |                     |      |
| TC1200000899.mm.1 | 4,63 Nrnx3   | JUC1200003698.mm.1 | -14,2  | 0,001293 | 0,32263  |                     |      |
| TC1200000899.mm.1 | 4,63 Nrnx3   | JUC1200003703.mm.1 | -14,51 | 0,001783 | 0,336311 |                     |      |
| TC0300002025.mm.1 | -1,35 Wwtr1  | PSR0300015346.mm.1 | 3,8    | 0,002169 | 0,344453 | Alternative 5' Donc | 0,45 |
| TC1700000092.mm.1 | 2,27 Pde10a  | JUC1700000428.mm.1 | 3,8    | 0,036473 | 0,531124 |                     |      |
| TC1700000092.mm.1 | 2,27 Pde10a  | JUC1700000444.mm.1 | 3,55   | 0,006853 | 0,393893 |                     |      |
| TC1700000092.mm.1 | 2,27 Pde10a  | PSR1700000794.mm.1 | 2,41   | 0,012113 | 0,432704 | Cassette Exon       | 0,08 |
| TC1700000092.mm.1 | 2,27 Pde10a  | PSR1700000781.mm.1 | -2,36  | 0,021351 | 0,481836 | Cassette Exon       | 0,05 |
| TC1700000092.mm.1 | 2,27 Pde10a  | PSR1700000772.mm.1 | -2,5   | 0,001888 | 0,338712 | Cassette Exon       | 0,21 |
| TC1700000092.mm.1 | 2,27 Pde10a  | JUC1700000435.mm.1 | -2,63  | 0,015435 | 0,454229 |                     |      |
| TC1700000092.mm.1 | 2,27 Pde10a  | JUC1700000426.mm.1 | -2,69  | 0,012468 | 0,435315 |                     |      |
| TC1700000092.mm.1 | 2,27 Pde10a  | JUC1700000443.mm.1 | -2,99  | 0,001681 | 0,335182 |                     |      |
| TC1700000092.mm.1 | 2,27 Pde10a  | PSR1700000796.mm.1 | -3,12  | 0,000133 | 0,270905 | Cassette Exon       | 0,31 |
| TC1700000092.mm.1 | 2,27 Pde10a  | JUC1700000419.mm.1 | -3,17  | 0,039817 | 0,540852 |                     |      |
| TC1700000092.mm.1 | 2,27 Pde10a  | JUC1700000452.mm.1 | -3,43  | 0,033697 | 0,523549 |                     |      |
| TC1700000092.mm.1 | 2,27 Pde10a  | JUC1700000447.mm.1 | -4,01  | 0,003779 | 0,357586 |                     |      |
| TC1700000092.mm.1 | 2,27 Pde10a  | JUC1700000423.mm.1 | -4,57  | 0,002583 | 0,349501 |                     |      |
| TC0200002792.mm.1 | 2,11 Slco4a1 | JUC0200011578.mm.1 | 3,8    | 0,026211 | 0,500076 |                     |      |
| TC0200002792.mm.1 | 2,11 Slco4a1 | JUC0200011564.mm.1 | -2,02  | 0,04021  | 0,541714 |                     |      |
| TC0200002792.mm.1 | 2,11 Slco4a1 | PSR0200022817.mm.1 | -2,1   | 0,00936  | 0,415092 | Cassette Exon       | 0,09 |
| TC0200002792.mm.1 | 2,11 Slco4a1 | JUC0200011568.mm.1 | -2,3   | 0,015459 | 0,454312 |                     |      |
| TC0200002792.mm.1 | 2,11 Slco4a1 | PSR0200022828.mm.1 | -2,35  | 0,003344 | 0,354243 | Alternative 5' Donc | 0,15 |
| TC0200002792.mm.1 | 2,11 Slco4a1 | JUC0200011576.mm.1 | -2,4   | 0,027106 | 0,503022 |                     |      |
| TC0200002792.mm.1 | 2,11 Slco4a1 | PSR0200022820.mm.1 | -2,43  | 0,003368 | 0,354278 | Alternative 3' Acce | 0,23 |
| TC0200002792.mm.1 | 2,11 Slco4a1 | JUC0200011577.mm.1 | -3,36  | 0,002612 | 0,349501 |                     |      |
| TC1000001561.mm.1 | -1,06 R3hdm2 | JUC1000006009.mm.1 | 3,8    | 0,000297 | 0,288663 |                     |      |
| TC1000001561.mm.1 | -1,06 R3hdm2 | PSR1000011139.mm.1 | 2,5    | 0,009389 | 0,415556 | Cassette Exon       | 0,1  |
| TC1000001561.mm.1 | -1,06 R3hdm2 | JUC1000006011.mm.1 | 2,43   | 0,032632 | 0,520338 |                     |      |
| TC1000001561.mm.1 | -1,06 R3hdm2 | JUC1000006015.mm.1 | 2,24   | 0,013936 | 0,446202 |                     |      |
| TC1000001561.mm.1 | -1,06 R3hdm2 | JUC1000006002.mm.1 | 2,2    | 0,002955 | 0,352501 |                     |      |

|                   |               |                    |        |          |                              |      |
|-------------------|---------------|--------------------|--------|----------|------------------------------|------|
| TC0X00000951.mm.1 | -1,69 Igbp1   | JUC0X00003003.mm.1 | 3,8    | 0,023325 | 0,490065                     |      |
| TC0300000202.mm.1 | 7,37 Samd7    | JUC0300000529.mm.1 | 3,79   | 0,003214 | 0,354243                     |      |
| TC0300000202.mm.1 | 7,37 Samd7    | JUC0300000533.mm.1 | 2,92   | 0,017987 | 0,466929                     |      |
| TC0300000202.mm.1 | 7,37 Samd7    | PSR0300001088.mm.1 | 2,06   | 0,007022 | 0,395932 Cassette Exon       | 0,22 |
| TC0300000202.mm.1 | 7,37 Samd7    | JUC0300000534.mm.1 | 2,01   | 0,033023 | 0,521478                     |      |
| TC0300000202.mm.1 | 7,37 Samd7    | PSR0300001086.mm.1 | -7,44  | 0,0135   | 0,443238 Cassette Exon       | 0,35 |
| TC0300000202.mm.1 | 7,37 Samd7    | JUC0300000530.mm.1 | -12,36 | 0,001551 | 0,330671                     |      |
| TC0300001795.mm.1 | 1,73 Slc7a14  | PSR0300013907.mm.1 | 3,79   | 0,001934 | 0,340349 Cassette Exon       | 0,22 |
| TC0300001795.mm.1 | 1,73 Slc7a14  | JUC0300007329.mm.1 | -2,36  | 0,018701 | 0,470452                     |      |
| TC0300001795.mm.1 | 1,73 Slc7a14  | PSR0300013899.mm.1 | -2,64  | 0,017738 | 0,465238 Alternative 3' Acce | 0,26 |
| TC0300001795.mm.1 | 1,73 Slc7a14  | PSR0300013910.mm.1 | -2,98  | 0,021864 | 0,484635 Cassette Exon       | 0,18 |
| TC0400000309.mm.1 | 1,05 Rars2    | PSR0400001971.mm.1 | 3,79   | 0,000677 | 0,304338 Cassette Exon       | 0,26 |
| TC1800000897.mm.1 | 2,29 Neto1    | PSR1800006488.mm.1 | 3,79   | 0,002046 | 0,341377 Cassette Exon       | 0,15 |
| TC1800000897.mm.1 | 2,29 Neto1    | PSR1800006490.mm.1 | 2,29   | 0,001734 | 0,335996 Alternative 5' Donc | 0,12 |
| TC1800000897.mm.1 | 2,29 Neto1    | PSR1800006478.mm.1 | -2,24  | 0,017655 | 0,464608 Alternative 3' Acce | 0,14 |
| TC1800000897.mm.1 | 2,29 Neto1    | JUC1800003584.mm.1 | -3,21  | 0,019379 | 0,473624                     |      |
| TC1200002586.mm.1 | 4 Ighv14-4    | PSR1200017871.mm.1 | 3,78   | 0,017894 | 0,466466 Cassette Exon       | 0,2  |
| TC1200002586.mm.1 | 4 Ighv14-4    | PSR1200018887.mm.1 | -3,78  | 0,017894 | 0,466466 Cassette Exon       | 0,31 |
| TC0500002933.mm.1 | 1,3 Evi5      | PSR0500025940.mm.1 | 3,78   | 0,023568 | 0,490947 Cassette Exon       | 0,17 |
| TC0500002933.mm.1 | 1,3 Evi5      | JUC0500014137.mm.1 | 2,96   | 0,021342 | 0,481754                     |      |
| TC0500002933.mm.1 | 1,3 Evi5      | JUC0500014145.mm.1 | 2,91   | 0,045081 | 0,55315                      |      |
| TC1100003819.mm.1 | 1,24 Mpp3     | PSR1100035399.mm.1 | 3,78   | 0,008232 | 0,405976                     |      |
| TC1100003819.mm.1 | 1,24 Mpp3     | JUC1100018499.mm.1 | -2,45  | 0,003442 | 0,3554                       |      |
| TC1900000550.mm.1 | -1,18         | JUC1900002619.mm.1 | 3,78   | 0,00165  | 0,334069                     |      |
| TC1900000100.mm.1 | 1,09 Gm550    | JUC1900000575.mm.1 | 3,78   | 0,032633 | 0,520338                     |      |
| TC0500003099.mm.1 | 1,16          | PSR0500027598.mm.1 | 3,77   | 0,001653 | 0,334268 Alternative 5' Donc | 0,26 |
| TC0500003099.mm.1 | 1,16          | PSR0500027597.mm.1 | 2,18   | 0,029509 | 0,510139                     |      |
| TC0300002320.mm.1 | -1,21 Gm20652 | JUC0300009264.mm.1 | 3,77   | 0,038872 | 0,537834                     |      |
| TC0400001627.mm.1 | 1,35 Ubxn11   | JUC0400006704.mm.1 | 3,77   | 0,04026  | 0,541822                     |      |
| TC0400001627.mm.1 | 1,35 Ubxn11   | JUC0400006716.mm.1 | -3,23  | 0,017068 | 0,46205                      |      |
| TC0400001627.mm.1 | 1,35 Ubxn11   | JUC0400006698.mm.1 | -3,27  | 0,013322 | 0,441836                     |      |
| TC0400002189.mm.1 | -1,12 Asph    | JUC0400009546.mm.1 | 3,77   | 0,035373 | 0,528536                     |      |
| TC0400002189.mm.1 | -1,12 Asph    | JUC0400009522.mm.1 | 3,19   | 0,02295  | 0,488667                     |      |
| TC0400002189.mm.1 | -1,12 Asph    | JUC0400009540.mm.1 | 2,23   | 0,005307 | 0,378059                     |      |
| TC0400002189.mm.1 | -1,12 Asph    | JUC0400009544.mm.1 | -3,12  | 0,006257 | 0,388622                     |      |
| TC0700004538.mm.1 | 3,87 Slc25a22 | PSR0700038172.mm.1 | 3,76   | 0,005842 | 0,383458                     |      |
| TC0700004538.mm.1 | 3,87 Slc25a22 | PSR0700038202.mm.1 | -2,02  | 0,027315 | 0,503732                     |      |
| TC0700004538.mm.1 | 3,87 Slc25a22 | JUC0700020135.mm.1 | -2,18  | 0,032594 | 0,520272                     |      |
| TC0700004538.mm.1 | 3,87 Slc25a22 | JUC0700020132.mm.1 | -2,23  | 0,043945 | 0,550715                     |      |
| TC0700004538.mm.1 | 3,87 Slc25a22 | PSR0700038161.mm.1 | -2,55  | 0,047656 | 0,558801 Cassette Exon       | 0,21 |
| TC0700004538.mm.1 | 3,87 Slc25a22 | JUC0700020136.mm.1 | -2,59  | 0,035494 | 0,528724                     |      |
| TC0700004538.mm.1 | 3,87 Slc25a22 | PSR0700038201.mm.1 | -2,64  | 0,011963 | 0,431914                     |      |
| TC0700004538.mm.1 | 3,87 Slc25a22 | JUC0700020129.mm.1 | -2,66  | 0,034763 | 0,52661                      |      |
| TC0700004538.mm.1 | 3,87 Slc25a22 | PSR0700038186.mm.1 | -2,7   | 0,013024 | 0,439354 Intron Retention    | 0,45 |
| TC0700004538.mm.1 | 3,87 Slc25a22 | PSR0700038196.mm.1 | -2,71  | 0,003471 | 0,355628 Intron Retention    | 0,39 |
| TC0700004538.mm.1 | 3,87 Slc25a22 | PSR0700038203.mm.1 | -2,79  | 0,004823 | 0,371408                     |      |
| TC0700004538.mm.1 | 3,87 Slc25a22 | PSR0700038163.mm.1 | -2,8   | 0,016355 | 0,458693 Alternative 3' Acce | 0,16 |
| TC0700004538.mm.1 | 3,87 Slc25a22 | PSR0700038174.mm.1 | -3,02  | 0,01938  | 0,473624 Intron Retention    | 0,48 |

|                   |                     |                    |        |          |                              |      |
|-------------------|---------------------|--------------------|--------|----------|------------------------------|------|
| TC0700004538.mm.1 | 3,87 Slc25a22       | PSR0700038177.mm.1 | -3,1   | 0,00742  | 0,399901 Intron Retention    | 0,17 |
| TC0700004538.mm.1 | 3,87 Slc25a22       | PSR0700038198.mm.1 | -3,12  | 0,012858 | 0,437778 Intron Retention    | 0,28 |
| TC0700004538.mm.1 | 3,87 Slc25a22       | PSR0700038169.mm.1 | -3,14  | 0,003476 | 0,355628 Intron Retention    | 0,53 |
| TC0700004538.mm.1 | 3,87 Slc25a22       | JUC0700020134.mm.1 | -3,17  | 0,008667 | 0,408649                     |      |
| TC0700004538.mm.1 | 3,87 Slc25a22       | PSR0700038212.mm.1 | -3,23  | 0,0159   | 0,456586 Alternative 5' Donc | 0,22 |
| TC0700004538.mm.1 | 3,87 Slc25a22       | PSR0700038181.mm.1 | -3,25  | 0,042847 | 0,548097                     |      |
| TC0700004538.mm.1 | 3,87 Slc25a22       | PSR0700038217.mm.1 | -3,28  | 0,031608 | 0,517338 Alternative 5' Donc | 0,05 |
| TC0700004538.mm.1 | 3,87 Slc25a22       | PSR0700038188.mm.1 | -3,51  | 0,015462 | 0,454312 Intron Retention    | 0,41 |
| TC0700004538.mm.1 | 3,87 Slc25a22       | PSR0700038166.mm.1 | -3,67  | 0,016665 | 0,460023 Intron Retention    | 0,65 |
| TC0700004538.mm.1 | 3,87 Slc25a22       | PSR0700038192.mm.1 | -4,12  | 0,009826 | 0,417839 Intron Retention    | 0,75 |
| TC0700004538.mm.1 | 3,87 Slc25a22       | PSR0700038185.mm.1 | -4,63  | 0,039268 | 0,538976 Intron Retention    | 0,45 |
| TC0700004538.mm.1 | 3,87 Slc25a22       | JUC0700020127.mm.1 | -6,26  | 0,002184 | 0,34446                      |      |
| TC1900001144.mm.1 | 6,31 Stx3           | JUC1900005868.mm.1 | 3,76   | 0,005188 | 0,376876                     |      |
| TC1900001144.mm.1 | 6,31 Stx3           | JUC1900005869.mm.1 | 3,72   | 0,017058 | 0,461937                     |      |
| TC1900001144.mm.1 | 6,31 Stx3           | PSR1900010742.mm.1 | -2,69  | 0,000638 | 0,304044 Cassette Exon       | 0,34 |
| TC1900001144.mm.1 | 6,31 Stx3           | JUC1900005877.mm.1 | -4,3   | 0,003661 | 0,357266                     |      |
| TC1900001144.mm.1 | 6,31 Stx3           | PSR1900010743.mm.1 | -5,36  | 0,002008 | 0,341091 Cassette Exon       | 0,51 |
| TC1900001144.mm.1 | 6,31 Stx3           | PSR1900010734.mm.1 | -5,39  | 0,001474 | 0,329052 Cassette Exon       | 0,6  |
| TC1900001144.mm.1 | 6,31 Stx3           | PSR1900010746.mm.1 | -5,96  | 0,000952 | 0,313363 Cassette Exon       | 0,34 |
| TC1900001144.mm.1 | 6,31 Stx3           | PSR1900010748.mm.1 | -6,24  | 0,007865 | 0,403545 Cassette Exon       | 0,34 |
| TC1900001144.mm.1 | 6,31 Stx3           | PSR1900010737.mm.1 | -6,7   | 0,001745 | 0,335996 Cassette Exon       | 0,73 |
| TC1900001144.mm.1 | 6,31 Stx3           | JUC1900005879.mm.1 | -10,72 | 0,003125 | 0,353892                     |      |
| TC1900001144.mm.1 | 6,31 Stx3           | JUC1900005881.mm.1 | -11,46 | 0,008551 | 0,408183                     |      |
| TC1900001144.mm.1 | 6,31 Stx3           | PSR1900010735.mm.1 | -13,32 | 0,001546 | 0,330631 Cassette Exon       | 0,73 |
| TC1900001144.mm.1 | 6,31 Stx3           | JUC1900005882.mm.1 | -13,69 | 0,003289 | 0,354243                     |      |
| TC1900001144.mm.1 | 6,31 Stx3           | JUC1900005880.mm.1 | -23    | 0,002534 | 0,349501                     |      |
| TC0200002341.mm.1 | 1,26 Cbfa2t2        | PSR0200018592.mm.1 | 3,76   | 0,022891 | 0,488524 Alternative 3' Acce | 0,43 |
| TC0200001940.mm.1 | 1,18 Zc3h6; Gm14027 | PSR0200015289.mm.1 | 3,76   | 0,04842  | 0,560736 Alternative 3' Acce | 0,42 |
| TC1100004192.mm.1 | 1,39 Aatk           | JUC1100020933.mm.1 | 3,76   | 0,016357 | 0,458693                     |      |
| TC1100004192.mm.1 | 1,39 Aatk           | JUC1100020929.mm.1 | 3,71   | 0,033871 | 0,524121                     |      |
| TC1100004192.mm.1 | 1,39 Aatk           | JUC1100020927.mm.1 | 2,97   | 0,031913 | 0,518021                     |      |
| TC1100004192.mm.1 | 1,39 Aatk           | PSR1100039828.mm.1 | 2,79   | 0,011653 | 0,429904 Alternative 3' Acce | 0,37 |
| TC1100004192.mm.1 | 1,39 Aatk           | PSR1100039845.mm.1 | -2,16  | 0,003845 | 0,358723 Cassette Exon       | 0,11 |
| TC1100004192.mm.1 | 1,39 Aatk           | JUC1100020926.mm.1 | -2,26  | 0,006307 | 0,389234                     |      |
| TC1100004192.mm.1 | 1,39 Aatk           | PSR1100039841.mm.1 | -2,46  | 0,001047 | 0,316361 Cassette Exon       | 0,35 |
| TC1100004192.mm.1 | 1,39 Aatk           | JUC1100020937.mm.1 | -2,82  | 0,008378 | 0,4065                       |      |
| TC0X00003246.mm.1 | 1,04 Phex           | JUC0X00010242.mm.1 | 3,76   | 0,018579 | 0,469618                     |      |
| TC0X00003246.mm.1 | 1,04 Phex           | JUC0X00010238.mm.1 | -2,08  | 0,010641 | 0,422898                     |      |
| TC0X00003246.mm.1 | 1,04 Phex           | PSR0X00020328.mm.1 | -4,81  | 0,020479 | 0,478018 Alternative 5' Donc | 0,36 |
| TC0200001013.mm.1 | 1,19 Ssb            | PSR0200008003.mm.1 | 3,76   | 0,019377 | 0,473624 Alternative 5' Donc | 0,35 |
| TC1200001704.mm.1 | 2,66 Prkd1          | JUC1200006498.mm.1 | 3,76   | 0,043779 | 0,550398                     |      |
| TC1200001704.mm.1 | 2,66 Prkd1          | JUC1200006492.mm.1 | 2,58   | 0,016461 | 0,459205                     |      |
| TC1200001704.mm.1 | 2,66 Prkd1          | PSR1200011738.mm.1 | 2,26   | 0,000372 | 0,291725 Cassette Exon       | 0,18 |
| TC1200001704.mm.1 | 2,66 Prkd1          | PSR1200011744.mm.1 | -2,14  | 0,016015 | 0,457051 Cassette Exon       | 0,14 |
| TC1200001704.mm.1 | 2,66 Prkd1          | PSR1200011751.mm.1 | -2,24  | 0,005806 | 0,383104 Cassette Exon       | 0,18 |
| TC1200001704.mm.1 | 2,66 Prkd1          | JUC1200006509.mm.1 | -2,52  | 0,012094 | 0,43255                      |      |
| TC1200001704.mm.1 | 2,66 Prkd1          | JUC1200006499.mm.1 | -2,72  | 0,048375 | 0,56056                      |      |
| TC1700000971.mm.1 | 1,02 Kcnh8          | JUC1700004930.mm.1 | 3,76   | 0,047854 | 0,559373                     |      |

|                   |                    |                    |       |          |                              |      |
|-------------------|--------------------|--------------------|-------|----------|------------------------------|------|
| TC0500001452.mm.1 | -1,14 Dnah10       | JUC0500007174.mm.1 | 3,76  | 0,032985 | 0,521353                     |      |
| TC0500001452.mm.1 | -1,14 Dnah10       | JUC0500007235.mm.1 | 3,21  | 0,018435 | 0,468646                     |      |
| TC0500000060.mm.1 | 1,26 9330182L06Rik | JUC0500000331.mm.1 | 3,76  | 0,008179 | 0,40568                      |      |
| TC0500000060.mm.1 | 1,26 9330182L06Rik | JUC0500000328.mm.1 | 2,32  | 0,012894 | 0,438165                     |      |
| TC0900002254.mm.1 | 2,89 Ncam1         | JUC0900010589.mm.1 | 3,75  | 0,006687 | 0,393201                     |      |
| TC0900002254.mm.1 | 2,89 Ncam1         | JUC0900010585.mm.1 | 3,73  | 0,000149 | 0,272178                     |      |
| TC0900002254.mm.1 | 2,89 Ncam1         | PSR0900018801.mm.1 | 3,1   | 0,003612 | 0,356223 Cassette Exon       | 0,22 |
| TC0900002254.mm.1 | 2,89 Ncam1         | JUC0900010591.mm.1 | 2,47  | 0,00918  | 0,413594                     |      |
| TC0900002254.mm.1 | 2,89 Ncam1         | JUC0900010590.mm.1 | 2,33  | 0,001494 | 0,329143                     |      |
| TC0900002254.mm.1 | 2,89 Ncam1         | PSR0900018821.mm.1 | -2,01 | 0,034181 | 0,525025 Alternative 5' Donc | 0,18 |
| TC0900002254.mm.1 | 2,89 Ncam1         | PSR0900018788.mm.1 | -2,55 | 0,034611 | 0,52602 Cassette Exon        | 0,35 |
| TC0900002254.mm.1 | 2,89 Ncam1         | JUC0900010587.mm.1 | -2,59 | 0,024885 | 0,49558                      |      |
| TC0900002254.mm.1 | 2,89 Ncam1         | PSR0900018822.mm.1 | -2,68 | 0,043567 | 0,550033 Alternative 5' Donc | 0,18 |
| TC0900002254.mm.1 | 2,89 Ncam1         | PSR0900018796.mm.1 | -2,8  | 0,008552 | 0,408183                     |      |
| TC0900002254.mm.1 | 2,89 Ncam1         | PSR0900018806.mm.1 | -2,86 | 0,031837 | 0,517856 Alternative 3' Acce | 0,26 |
| TC0900002254.mm.1 | 2,89 Ncam1         | PSR0900018799.mm.1 | -2,87 | 0,03958  | 0,539856 Cassette Exon       | 0,44 |
| TC0900002254.mm.1 | 2,89 Ncam1         | PSR0900018798.mm.1 | -3,38 | 0,036163 | 0,529905 Cassette Exon       | 0,36 |
| TC0900002254.mm.1 | 2,89 Ncam1         | PSR0900018797.mm.1 | -3,38 | 0,017755 | 0,465425 Alternative 5' Donc | 0,09 |
| TC0900002254.mm.1 | 2,89 Ncam1         | PSR0900018786.mm.1 | -3,71 | 0,007616 | 0,401872 Cassette Exon       | 0,13 |
| TC0900002254.mm.1 | 2,89 Ncam1         | PSR0900018808.mm.1 | -4,85 | 0,034839 | 0,526823 Alternative 5' Donc | 0,48 |
| TC0900002254.mm.1 | 2,89 Ncam1         | JUC0900010586.mm.1 | -5,12 | 0,006972 | 0,395722                     |      |
| TC0900002254.mm.1 | 2,89 Ncam1         | PSR0900018795.mm.1 | -7,52 | 0,00505  | 0,374728 Alternative 3' Acce | 0,19 |
| TC0900002254.mm.1 | 2,89 Ncam1         | JUC0900010608.mm.1 | -8,85 | 0,017324 | 0,463383                     |      |
| TC1100002025.mm.1 | 2,67 Fscn2         | JUC1100010158.mm.1 | 3,75  | 0,007536 | 0,401261                     |      |
| TC1100002025.mm.1 | 2,67 Fscn2         | PSR1100019443.mm.1 | 3,16  | 0,006186 | 0,387873 Alternative 3' Acce | 0,43 |
| TC1100002025.mm.1 | 2,67 Fscn2         | PSR1100019445.mm.1 | -2,23 | 0,0127   | 0,43642 Cassette Exon        | 0,25 |
| TC1100002025.mm.1 | 2,67 Fscn2         | PSR1100019442.mm.1 | -2,27 | 0,005791 | 0,383104 Alternative 3' Acce | 0,33 |
| TC1100002025.mm.1 | 2,67 Fscn2         | PSR1100019446.mm.1 | -2,56 | 0,005657 | 0,381879 Intron Retention    | 0,13 |
| TC1100002025.mm.1 | 2,67 Fscn2         | PSR1100019440.mm.1 | -2,96 | 0,006918 | 0,394973 Alternative 3' Acce | 0,31 |
| TC1100002025.mm.1 | 2,67 Fscn2         | JUC1100010160.mm.1 | -4    | 0,036424 | 0,530958                     |      |
| TC1600001011.mm.1 | 1,44 ltsn1         | PSR1600007947.mm.1 | 3,75  | 0,022656 | 0,487609 Cassette Exon       | 0,35 |
| TC1600001011.mm.1 | 1,44 ltsn1         | JUC1600004124.mm.1 | 3,56  | 0,002898 | 0,352207                     |      |
| TC1600001011.mm.1 | 1,44 ltsn1         | JUC1600004120.mm.1 | 2,95  | 0,033382 | 0,522707                     |      |
| TC1600001011.mm.1 | 1,44 ltsn1         | PSR1600007950.mm.1 | 2,71  | 0,024674 | 0,49472 Cassette Exon        | 0,23 |
| TC1600001011.mm.1 | 1,44 ltsn1         | PSR1600007954.mm.1 | 2,56  | 0,024815 | 0,495292 Cassette Exon       | 0,28 |
| TC1600001011.mm.1 | 1,44 ltsn1         | PSR1600007946.mm.1 | 2,51  | 0,000349 | 0,290082 Cassette Exon       | 0,19 |
| TC1600001011.mm.1 | 1,44 ltsn1         | JUC1600004116.mm.1 | 2,16  | 0,013671 | 0,444535                     |      |
| TC1600001011.mm.1 | 1,44 ltsn1         | JUC1600004118.mm.1 | 2,14  | 0,032979 | 0,521324                     |      |
| TC1600001011.mm.1 | 1,44 ltsn1         | JUC1600004117.mm.1 | 2,02  | 0,024301 | 0,49362                      |      |
| TC1600001011.mm.1 | 1,44 ltsn1         | PSR1600007948.mm.1 | 2,01  | 0,005416 | 0,379167 Cassette Exon       | 0,21 |
| TC1600001011.mm.1 | 1,44 ltsn1         | JUC1600004088.mm.1 | -2,02 | 0,020354 | 0,47734                      |      |
| TC1600001011.mm.1 | 1,44 ltsn1         | PSR1600007924.mm.1 | -2,14 | 0,000682 | 0,304417 Cassette Exon       | 0,12 |
| TC1600001011.mm.1 | 1,44 ltsn1         | JUC1600004091.mm.1 | -2,17 | 0,043563 | 0,550033                     |      |
| TC1600001011.mm.1 | 1,44 ltsn1         | JUC1600004111.mm.1 | -2,21 | 0,020534 | 0,478295                     |      |
| TC1600001011.mm.1 | 1,44 ltsn1         | JUC1600004134.mm.1 | -2,54 | 0,027877 | 0,505612                     |      |
| TC0X00002116.mm.1 | 1,5 Tenm1          | JUC0X00006891.mm.1 | 3,75  | 0,017248 | 0,462729                     |      |
| TC0X00002116.mm.1 | 1,5 Tenm1          | PSR0X00013485.mm.1 | 2,26  | 0,01503  | 0,452111 Cassette Exon       | 0,18 |
| TC0X00002116.mm.1 | 1,5 Tenm1          | JUC0X00006879.mm.1 | 2,23  | 0,025511 | 0,497664                     |      |

|                   |                    |                    |       |          |                              |      |
|-------------------|--------------------|--------------------|-------|----------|------------------------------|------|
| TCOX00002116.mm.1 | 1,5 Tenm1          | PSROX00013492.mm.1 | -2,1  | 0,017014 | 0,461709 Cassette Exon       | 0,05 |
| TCOX00002116.mm.1 | 1,5 Tenm1          | JUCOX00006863.mm.1 | -2,29 | 0,020536 | 0,478295                     |      |
| TC1000001334.mm.1 | 1,61 Ptprr         | JUC1000005392.mm.1 | 3,75  | 0,004546 | 0,368794                     |      |
| TC1000001334.mm.1 | 1,61 Ptprr         | PSR1000009960.mm.1 | 2,41  | 0,009095 | 0,412827 Cassette Exon       | 0,08 |
| TC1000001334.mm.1 | 1,61 Ptprr         | PSR1000009951.mm.1 | -2,14 | 0,015207 | 0,452773 Cassette Exon       | 0,15 |
| TC1000001334.mm.1 | 1,61 Ptprr         | JUC1000005399.mm.1 | -2,24 | 0,037683 | 0,534394                     |      |
| TC1000001334.mm.1 | 1,61 Ptprr         | PSR1000009947.mm.1 | -2,38 | 0,027035 | 0,502979 Alternative 3' Acce | 0,15 |
| TC1000001334.mm.1 | 1,61 Ptprr         | PSR1000009956.mm.1 | -2,41 | 0,017798 | 0,465641 Cassette Exon       | 0,03 |
| TC1000001334.mm.1 | 1,61 Ptprr         | PSR1000009962.mm.1 | -2,46 | 0,029542 | 0,510303 Cassette Exon       | 0,17 |
| TC1000001334.mm.1 | 1,61 Ptprr         | JUC1000005401.mm.1 | -2,61 | 0,036137 | 0,529805                     |      |
| TC1400001579.mm.1 | 1,18 Polr3a        | JUC1400006465.mm.1 | 3,75  | 0,046644 | 0,55681                      |      |
| TC1400001579.mm.1 | 1,18 Polr3a        | JUC1400006489.mm.1 | 2,65  | 0,003832 | 0,358553                     |      |
| TC1400001579.mm.1 | 1,18 Polr3a        | JUC1400006471.mm.1 | -2,1  | 0,024725 | 0,494838                     |      |
| TC1300001112.mm.1 | 1,15 Ankra2        | JUC1300003710.mm.1 | 3,75  | 0,026716 | 0,502096                     |      |
| TC0300002765.mm.1 | 3,02 Ntng1         | PSR0300021775.mm.1 | 3,74  | 0,001088 | 0,317224 Mutually Exclusive  | 0,46 |
| TC0300002765.mm.1 | 3,02 Ntng1         | JUC0300011341.mm.1 | 3,55  | 0,009469 | 0,416539                     |      |
| TC0300002765.mm.1 | 3,02 Ntng1         | JUC0300011345.mm.1 | -2,02 | 0,034242 | 0,525168                     |      |
| TC0300002765.mm.1 | 3,02 Ntng1         | PSR0300021795.mm.1 | -2,04 | 0,038438 | 0,536405 Cassette Exon       | 0,1  |
| TC0300002765.mm.1 | 3,02 Ntng1         | PSR0300021766.mm.1 | -2,31 | 0,001476 | 0,329052 Alternative 3' Acce | 0,16 |
| TC0300002765.mm.1 | 3,02 Ntng1         | PSR0300021771.mm.1 | -2,43 | 0,000149 | 0,272178 Alternative 5' Donc | 0,18 |
| TC0300002765.mm.1 | 3,02 Ntng1         | PSR0300021774.mm.1 | -2,68 | 0,004375 | 0,365775 Mutually Exclusive  | 0,46 |
| TC0300002765.mm.1 | 3,02 Ntng1         | PSR0300021773.mm.1 | -2,85 | 0,019383 | 0,473624 Mutually Exclusive  | 0,46 |
| TC0300002765.mm.1 | 3,02 Ntng1         | JUC0300011342.mm.1 | -3,34 | 0,002387 | 0,348564                     |      |
| TC0300002765.mm.1 | 3,02 Ntng1         | JUC0300011362.mm.1 | -3,64 | 0,049417 | 0,563031                     |      |
| TC0300002765.mm.1 | 3,02 Ntng1         | JUC0300011355.mm.1 | -3,86 | 0,00445  | 0,367227                     |      |
| TC0300002765.mm.1 | 3,02 Ntng1         | JUC0300011354.mm.1 | -4,06 | 0,029934 | 0,511499                     |      |
| TC0300002765.mm.1 | 3,02 Ntng1         | JUC0300011353.mm.1 | -5,01 | 0,02793  | 0,505612                     |      |
| TC0300002765.mm.1 | 3,02 Ntng1         | PSR0300021783.mm.1 | -6,93 | 0,007334 | 0,399002 Cassette Exon       | 0,24 |
| TC0300002765.mm.1 | 3,02 Ntng1         | PSR0300021780.mm.1 | -18,6 | 0,03396  | 0,524252 Cassette Exon       | 0,21 |
| TC0100001133.mm.1 | -1,23              | PSR0100009205.mm.1 | 3,74  | 0,032186 | 0,518833 Alternative 5' Donc | 0,44 |
| TC0700000300.mm.1 | 1,55 Ercc2; Mir343 | JUC0700001144.mm.1 | 3,74  | 0,008752 | 0,409704                     |      |
| TC0700000300.mm.1 | 1,55 Ercc2; Mir343 | PSR0700002382.mm.1 | -2,17 | 0,016696 | 0,460085 Intron Retention    | 0,29 |
| TC0700000300.mm.1 | 1,55 Ercc2; Mir343 | PSR0700002378.mm.1 | -2,35 | 0,015945 | 0,456831                     |      |
| TC0700000300.mm.1 | 1,55 Ercc2; Mir343 | JUC0700001154.mm.1 | -4,49 | 0,045786 | 0,554863                     |      |
| TC0100002948.mm.1 | 1,66 RP23-386K20.2 | PSR0100023670.mm.1 | 3,74  | 0,019578 | 0,474672 Cassette Exon       | 0,24 |
| TC0100002948.mm.1 | 1,66 RP23-386K20.2 | PSR0100023677.mm.1 | -2,35 | 0,030355 | 0,512923 Intron Retention    | 0,22 |
| TC0100002948.mm.1 | 1,66 RP23-386K20.2 | JUC0100013427.mm.1 | -2,39 | 0,026984 | 0,502838                     |      |
| TC1500000777.mm.1 | -1,12 Mpped1       | JUC1500003421.mm.1 | 3,74  | 0,020947 | 0,47998                      |      |
| TC0800000916.mm.1 | 1,55 Tbc1d9        | JUC0800003585.mm.1 | 3,74  | 0,02382  | 0,491955                     |      |
| TC0800000916.mm.1 | 1,55 Tbc1d9        | JUC0800003597.mm.1 | 2,3   | 0,036412 | 0,530904                     |      |
| TC0800000916.mm.1 | 1,55 Tbc1d9        | JUC0800003584.mm.1 | -3,59 | 0,011862 | 0,430929                     |      |
| TC0500000221.mm.1 | -1,1 Nub1          | JUC0500000995.mm.1 | 3,74  | 0,000335 | 0,28927                      |      |
| TC0500002558.mm.1 | 2,39 Gabra2        | PSR0500022647.mm.1 | 3,73  | 0,034564 | 0,525975 Alternative 5' Donc | 0,44 |
| TC0500002558.mm.1 | 2,39 Gabra2        | PSR0500022646.mm.1 | -2,51 | 0,011569 | 0,429011                     |      |
| TC0800000488.mm.1 | -1,03 Pcm1         | JUC0800001815.mm.1 | 3,73  | 0,019797 | 0,475212                     |      |
| TC0600000563.mm.1 | 1,15 AI854703      | JUC0600002195.mm.1 | 3,73  | 0,020594 | 0,478531                     |      |
| TC1100001629.mm.1 | -1,08 Nkiras2      | JUC1100007826.mm.1 | 3,73  | 0,019355 | 0,473512                     |      |
| TC1100001629.mm.1 | -1,08 Nkiras2      | JUC1100007825.mm.1 | 2,15  | 0,003784 | 0,357586                     |      |

|                   |                             |                     |       |          |          |                          |
|-------------------|-----------------------------|---------------------|-------|----------|----------|--------------------------|
| TC0100001048.mm.1 | 1,4 Cntnap5a                | JUC0100005002.mm.1  | 3,72  | 0,01397  | 0,446239 |                          |
| TC0100001048.mm.1 | 1,4 Cntnap5a                | JUC0100005009.mm.1  | 3,31  | 0,01976  | 0,474996 |                          |
| TC0100001048.mm.1 | 1,4 Cntnap5a                | PSR0100008681.mm.1  | 2,93  | 0,00471  | 0,370888 | Cassette Exon 0,29       |
| TC0100001048.mm.1 | 1,4 Cntnap5a                | JUC0100005000.mm.1  | 2,66  | 0,004359 | 0,365487 |                          |
| TC0100001048.mm.1 | 1,4 Cntnap5a                | PSR0100008685.mm.1  | 2,05  | 0,011146 | 0,426226 | Cassette Exon 0,13       |
| TC0100001048.mm.1 | 1,4 Cntnap5a                | JUC0100005011.mm.1  | -2,81 | 0,047962 | 0,559552 |                          |
| TC0100001048.mm.1 | 1,4 Cntnap5a                | JUC0100005008.mm.1  | -3,19 | 0,014366 | 0,448293 |                          |
| TC0100002827.mm.1 | 2,8 Kif1a                   | JUC0100013013.mm.1  | 3,72  | 0,029924 | 0,511499 |                          |
| TC0100002827.mm.1 | 2,8 Kif1a                   | JUC0100012967.mm.1  | -2,23 | 0,016692 | 0,460085 |                          |
| TC0100002827.mm.1 | 2,8 Kif1a                   | PSR0100022847.mm.1  | -2,58 | 0,011011 | 0,425601 | Cassette Exon 0,2        |
| TC0100002827.mm.1 | 2,8 Kif1a                   | JUC0100013004.mm.1  | -2,79 | 0,000106 | 0,265347 |                          |
| TC0100002827.mm.1 | 2,8 Kif1a                   | JUC0100012980.mm.1  | -4,15 | 0,011589 | 0,429241 |                          |
| TC1400001288.mm.1 | -3,73 Cldn10                | JUC1400005157.mm.1  | 3,72  | 0,005129 | 0,376377 |                          |
| TC1400001288.mm.1 | -3,73 Cldn10                | JUC1400005161.mm.1  | 3,63  | 0,019245 | 0,473063 |                          |
| TC1400001288.mm.1 | -3,73 Cldn10                | JUC1400005163.mm.1  | 3,11  | 0,017158 | 0,46232  |                          |
| TC1400001288.mm.1 | -3,73 Cldn10                | PSR1400009700.mm.1  | 2,65  | 0,041923 | 0,545814 | Cassette Exon 0,13       |
| TC1400001288.mm.1 | -3,73 Cldn10                | PSR1400009702.mm.1  | 2,63  | 0,007773 | 0,402826 | Alternative 3' Acce 0,2  |
| TC1400001288.mm.1 | -3,73 Cldn10                | PSR1400009701.mm.1  | 2,2   | 0,035714 | 0,529027 | Cassette Exon 0,13       |
| TC0200000518.mm.1 | 1,64 Sptan1                 | JUC0200001999.mm.1  | 3,72  | 0,008242 | 0,405976 |                          |
| TC0200000518.mm.1 | 1,64 Sptan1                 | PSR0200004005.mm.1  | -2,4  | 0,031481 | 0,516965 | Alternative 5' Donc 0,11 |
| TC0900000313.mm.1 | 1,52 Kirrel3; RP24-225I21.1 | JUC0900001270.mm.1  | 3,72  | 0,015834 | 0,456139 |                          |
| TC0900000313.mm.1 | 1,52 Kirrel3; RP24-225I21.1 | JUC0900001281.mm.1  | 2,93  | 0,009919 | 0,418378 |                          |
| TC0900000313.mm.1 | 1,52 Kirrel3; RP24-225I21.1 | JUC0900001271.mm.1  | -2,59 | 0,047072 | 0,557783 |                          |
| TC0300001647.mm.1 | 1,04 Snx16                  | JUC0300006941.mm.1  | 3,72  | 0,00746  | 0,400347 |                          |
| TC0Y00000006.mm.1 | 6,73 Eif2s3y                | JUC0Y000000065.mm.1 | 3,72  | 0,011119 | 0,426    |                          |
| TC0200000953.mm.1 | 2,63 Scn2a1                 | JUC0200003870.mm.1  | 3,71  | 0,037923 | 0,535147 |                          |
| TC0200000953.mm.1 | 2,63 Scn2a1                 | JUC0200003868.mm.1  | 2,53  | 0,020349 | 0,47734  |                          |
| TC0200000953.mm.1 | 2,63 Scn2a1                 | PSR0200007548.mm.1  | -3,83 | 0,025487 | 0,497664 | Alternative 3' Acce 0,45 |
| TC0900000066.mm.1 | 2 Trpc6                     | JUC0900000279.mm.1  | 3,71  | 0,022716 | 0,487767 |                          |
| TC0900000066.mm.1 | 2 Trpc6                     | PSR0900000500.mm.1  | -2,04 | 0,003859 | 0,358861 | Cassette Exon 0,14       |
| TC0900000066.mm.1 | 2 Trpc6                     | PSR0900000496.mm.1  | -2,88 | 0,010388 | 0,421341 | Alternative 3' Acce 0,12 |
| TC1400002873.mm.1 | -1,69                       | JUC1400010406.mm.1  | 3,71  | 0,01509  | 0,452418 |                          |
| TC0200001945.mm.1 | -1,36 Ttl                   | JUC0200007710.mm.1  | 3,71  | 0,008144 | 0,405416 |                          |
| TC0500001031.mm.1 | -1,6 Zfp33b                 | JUC0500004799.mm.1  | 3,71  | 0,043055 | 0,54841  |                          |
| TC0500001031.mm.1 | -1,6 Zfp33b                 | JUC0500004810.mm.1  | 2,98  | 0,048987 | 0,561849 |                          |
| TC0500001031.mm.1 | -1,6 Zfp33b                 | JUC0500004793.mm.1  | 2,92  | 0,03917  | 0,538679 |                          |
| TC0500001031.mm.1 | -1,6 Zfp33b                 | JUC0500004794.mm.1  | 2,92  | 0,03917  | 0,538679 |                          |
| TC0500001031.mm.1 | -1,6 Zfp33b                 | JUC0500004797.mm.1  | 2,92  | 0,03917  | 0,538679 |                          |
| TC0500001031.mm.1 | -1,6 Zfp33b                 | JUC0500004804.mm.1  | 2,45  | 0,030245 | 0,512493 |                          |
| TC0800003184.mm.1 | 1,05 Sipa1l2                | JUC0800013368.mm.1  | 3,71  | 0,042273 | 0,547092 |                          |
| TC0200004776.mm.1 | -1,07 Ralgapa2              | PSR0200040923.mm.1  | 3,7   | 0,021122 | 0,480611 | Cassette Exon 0,3        |
| TC0200004776.mm.1 | -1,07 Ralgapa2              | JUC0200021192.mm.1  | 3,55  | 0,017513 | 0,464009 |                          |
| TC0200004776.mm.1 | -1,07 Ralgapa2              | PSR0200040924.mm.1  | 2,84  | 0,033551 | 0,523131 | Cassette Exon 0,17       |
| TC0200004776.mm.1 | -1,07 Ralgapa2              | PSR0200040918.mm.1  | 2,69  | 0,045653 | 0,554766 | Cassette Exon 0,29       |
| TC0200004776.mm.1 | -1,07 Ralgapa2              | PSR0200040911.mm.1  | 2,07  | 0,041245 | 0,544166 | Cassette Exon 0,13       |
| TC1400000411.mm.1 | -1,32 Mat1a                 | JUC1400002119.mm.1  | 3,7   | 0,000331 | 0,28927  |                          |
| TC1200000427.mm.1 | 1,38 Arhgap5                | JUC1200001694.mm.1  | 3,7   | 0,002557 | 0,349501 |                          |
| TC0100002806.mm.1 | -1,02 Hdac4                 | JUC0100012888.mm.1  | 3,7   | 0,02299  | 0,488935 |                          |

|                   |       |                                           |       |          |                              |      |
|-------------------|-------|-------------------------------------------|-------|----------|------------------------------|------|
| TC0500001079.mm.1 | 1,37  | A830010M20Rik; 170002; PSR0500009101.mm.1 | 3,69  | 0,00136  | 0,32572 Intron Retention     | 0,48 |
| TC0500001079.mm.1 | 1,37  | A830010M20Rik; 170002; PSR0500009102.mm.1 | 3,04  | 0,001529 | 0,330287 Intron Retention    | 0,48 |
| TC0500001079.mm.1 | 1,37  | A830010M20Rik; 170002; JUC0500004960.mm.1 | 2,64  | 0,036753 | 0,531894                     |      |
| TC0500001079.mm.1 | 1,37  | A830010M20Rik; 170002; PSR0500009098.mm.1 | 2,19  | 0,029287 | 0,509874 Alternative 3' Acce | 0,16 |
| TC0500001079.mm.1 | 1,37  | A830010M20Rik; 170002; JUC0500004972.mm.1 | -2,8  | 0,040248 | 0,541731                     |      |
| TC0700002710.mm.1 | -2,79 | Eif3k PSR0700023795.mm.1                  | 3,69  | 0,02085  | 0,479521 Alternative 5' Donc | 0,42 |
| TC1100003034.mm.1 | 2,54  | Gucy2e PSR1100027555.mm.1                 | 3,69  | 0,034174 | 0,524992 Cassette Exon       | 0,33 |
| TC1100003034.mm.1 | 2,54  | Gucy2e JUC1100014416.mm.1                 | 3,3   | 0,002228 | 0,345773                     |      |
| TC1100003034.mm.1 | 2,54  | Gucy2e JUC1100014402.mm.1                 | 3,14  | 0,028211 | 0,506368                     |      |
| TC1100003034.mm.1 | 2,54  | Gucy2e JUC1100014408.mm.1                 | 2,92  | 0,000676 | 0,304338                     |      |
| TC1100003034.mm.1 | 2,54  | Gucy2e JUC1100014406.mm.1                 | 2,6   | 0,002258 | 0,34578                      |      |
| TC1100003034.mm.1 | 2,54  | Gucy2e PSR1100027551.mm.1                 | 2,59  | 0,015538 | 0,454617 Cassette Exon       | 0,24 |
| TC1100003034.mm.1 | 2,54  | Gucy2e JUC1100014409.mm.1                 | 2,45  | 0,017226 | 0,462633                     |      |
| TC1100003034.mm.1 | 2,54  | Gucy2e JUC1100014403.mm.1                 | 2,14  | 0,04157  | 0,544941                     |      |
| TC1100003034.mm.1 | 2,54  | Gucy2e JUC1100014415.mm.1                 | 2,11  | 0,047311 | 0,558289                     |      |
| TC1100003034.mm.1 | 2,54  | Gucy2e PSR1100027570.mm.1                 | 2,03  | 0,036941 | 0,532353 Cassette Exon       | 0,08 |
| TC1100003034.mm.1 | 2,54  | Gucy2e JUC1100014413.mm.1                 | -2,19 | 0,019018 | 0,471745                     |      |
| TC1100003034.mm.1 | 2,54  | Gucy2e JUC1100014418.mm.1                 | -2,22 | 0,039806 | 0,540795                     |      |
| TC1100003034.mm.1 | 2,54  | Gucy2e PSR1100027562.mm.1                 | -2,56 | 0,036876 | 0,532257 Alternative 3' Acce | 0,24 |
| TC1100003034.mm.1 | 2,54  | Gucy2e PSR1100027552.mm.1                 | -2,59 | 0,004946 | 0,373293 Intron Retention    | 0,34 |
| TC0X00003260.mm.1 | 2,26  | Cnksr2 JUC0X00010294.mm.1                 | 3,69  | 0,017922 | 0,466466                     |      |
| TC0X00003260.mm.1 | 2,26  | Cnksr2 JUC0X00010290.mm.1                 | -2,02 | 0,036539 | 0,531355                     |      |
| TC0X00003260.mm.1 | 2,26  | Cnksr2 JUC0X00010299.mm.1                 | -2,18 | 0,020539 | 0,478295                     |      |
| TC0X00003260.mm.1 | 2,26  | Cnksr2 PSR0X00020427.mm.1                 | -2,34 | 0,009058 | 0,412827 Cassette Exon       | 0,18 |
| TC0X00003260.mm.1 | 2,26  | Cnksr2 PSR0X00020405.mm.1                 | -2,44 | 0,035092 | 0,527591 Cassette Exon       | 0,08 |
| TC0X00003260.mm.1 | 2,26  | Cnksr2 PSR0X00020428.mm.1                 | -2,98 | 0,030954 | 0,514654 Cassette Exon       | 0,18 |
| TC0X00003260.mm.1 | 2,26  | Cnksr2 JUC0X00010291.mm.1                 | -2,98 | 0,004979 | 0,373851                     |      |
| TC0X00003260.mm.1 | 2,26  | Cnksr2 JUC0X00010295.mm.1                 | -3,23 | 0,024335 | 0,49362                      |      |
| TC1700001096.mm.1 | -1,05 | Lama1 JUC1700005609.mm.1                  | 3,69  | 0,010104 | 0,418998                     |      |
| TC1700001096.mm.1 | -1,05 | Lama1 PSR1700010320.mm.1                  | -2,12 | 0,007115 | 0,397032 Alternative 5' Donc | 0,18 |
| TC1100003814.mm.1 | -1,1  | Etv4 JUC1100018475.mm.1                   | 3,69  | 0,035323 | 0,528381                     |      |
| TC1100003814.mm.1 | -1,1  | Etv4 JUC1100018471.mm.1                   | 2,36  | 0,009472 | 0,416539                     |      |
| TC1800001431.mm.1 | -1    | Ablim3 JUC1800005850.mm.1                 | 3,69  | 0,025976 | 0,499207                     |      |
| TC1800001431.mm.1 | -1    | Ablim3 JUC1800005844.mm.1                 | 3     | 0,024603 | 0,494497                     |      |
| TC1100001702.mm.1 | 1,43  | Fam187a; Ccdc103 JUC1100008313.mm.1       | 3,69  | 0,00313  | 0,353892                     |      |
| TC0500000267.mm.1 | 1,14  | Rnf32 PSR0500002049.mm.1                  | 3,68  | 0,047676 | 0,558878 Alternative 5' Donc | 0,43 |
| TC0500000267.mm.1 | 1,14  | Rnf32 PSR0500002034.mm.1                  | 2,6   | 0,047635 | 0,558743                     |      |
| TC0500000267.mm.1 | 1,14  | Rnf32 PSR0500002033.mm.1                  | 2,45  | 0,002403 | 0,348653                     |      |
| TC1500001982.mm.1 | 1,85  | Sult4a1 PSR1500015745.mm.1                | 3,68  | 0,000128 | 0,270905 Cassette Exon       | 0,24 |
| TC1500001982.mm.1 | 1,85  | Sult4a1 JUC1500008936.mm.1                | 3,14  | 0,000225 | 0,28803                      |      |
| TC1500001982.mm.1 | 1,85  | Sult4a1 JUC1500008937.mm.1                | 2,46  | 0,015617 | 0,45509                      |      |
| TC1500001982.mm.1 | 1,85  | Sult4a1 PSR1500015742.mm.1                | 2,16  | 0,000229 | 0,28803 Cassette Exon        | 0,08 |
| TC1500001982.mm.1 | 1,85  | Sult4a1 PSR1500015747.mm.1                | -2,22 | 0,014274 | 0,448054                     |      |
| TC1500001982.mm.1 | 1,85  | Sult4a1 JUC1500008940.mm.1                | -2,74 | 0,016553 | 0,459612                     |      |
| TC0300001803.mm.1 | 1,18  | Mrpl47 JUC0300007357.mm.1                 | 3,68  | 0,014734 | 0,450562                     |      |
| TC0600002802.mm.1 | 1,56  | Frmd4b PSR0600021775.mm.1                 | 3,67  | 0,000468 | 0,298999 Cassette Exon       | 0,38 |
| TC0600002802.mm.1 | 1,56  | Frmd4b JUC0600011324.mm.1                 | 3,42  | 0,020546 | 0,478319                     |      |
| TC0600002802.mm.1 | 1,56  | Frmd4b JUC0600011326.mm.1                 | 2,91  | 0,004768 | 0,371039                     |      |

|                   |                     |                    |       |          |                              |      |
|-------------------|---------------------|--------------------|-------|----------|------------------------------|------|
| TC0600002802.mm.1 | 1,56 Frmd4b         | PSR0600021763.mm.1 | 2,87  | 0,00132  | 0,324348 Cassette Exon       | 0,16 |
| TC0600002802.mm.1 | 1,56 Frmd4b         | PSR0600021776.mm.1 | 2,73  | 0,003833 | 0,358553 Cassette Exon       | 0,34 |
| TC0600002802.mm.1 | 1,56 Frmd4b         | PSR0600021765.mm.1 | 2,55  | 0,000869 | 0,311909 Cassette Exon       | 0,2  |
| TC0600002802.mm.1 | 1,56 Frmd4b         | JUC0600011323.mm.1 | 2,54  | 0,010109 | 0,418998                     |      |
| TC0600002802.mm.1 | 1,56 Frmd4b         | PSR0600021768.mm.1 | 2,43  | 0,003952 | 0,359922 Cassette Exon       | 0,21 |
| TC0600002802.mm.1 | 1,56 Frmd4b         | JUC0600011322.mm.1 | 2,4   | 0,019904 | 0,475879                     |      |
| TC0600002802.mm.1 | 1,56 Frmd4b         | PSR0600021771.mm.1 | 2,39  | 0,001178 | 0,319796 Mutually Exclusive  | 0,21 |
| TC0600002802.mm.1 | 1,56 Frmd4b         | PSR0600021781.mm.1 | 2,29  | 0,012102 | 0,43255 Cassette Exon        | 0,28 |
| TC0600002802.mm.1 | 1,56 Frmd4b         | JUC0600011319.mm.1 | 2,1   | 0,003545 | 0,356223                     |      |
| TC0600002802.mm.1 | 1,56 Frmd4b         | JUC0600011321.mm.1 | 2,03  | 0,02901  | 0,508842                     |      |
| TC0600002802.mm.1 | 1,56 Frmd4b         | PSR0600021773.mm.1 | -2,2  | 0,029312 | 0,509874 Mutually Exclusive  | 0,21 |
| TC0600002802.mm.1 | 1,56 Frmd4b         | PSR0600021783.mm.1 | -2,25 | 0,046096 | 0,555713 Cassette Exon       | 0,18 |
| TC0600002802.mm.1 | 1,56 Frmd4b         | JUC0600011310.mm.1 | -2,56 | 0,006836 | 0,393893                     |      |
| TC0600002802.mm.1 | 1,56 Frmd4b         | PSR0600021769.mm.1 | -2,6  | 0,016253 | 0,458312 Alternative 5' Donc | 0,26 |
| TC0600002802.mm.1 | 1,56 Frmd4b         | PSR0600021757.mm.1 | -3,04 | 0,026244 | 0,500211 Alternative 5' Donc | 0,33 |
| TC0600002802.mm.1 | 1,56 Frmd4b         | PSR0600021756.mm.1 | -3,52 | 0,031709 | 0,517443 Alternative 5' Donc | 0,33 |
| TC0600002802.mm.1 | 1,56 Frmd4b         | JUC0600011314.mm.1 | -3,63 | 0,003915 | 0,359719                     |      |
| TC0600002802.mm.1 | 1,56 Frmd4b         | JUC0600011329.mm.1 | -4,51 | 0,000257 | 0,28803                      |      |
| TC0600002802.mm.1 | 1,56 Frmd4b         | PSR0600021758.mm.1 | -4,91 | 0,049282 | 0,562691 Alternative 5' Donc | 0,33 |
| TC0200003447.mm.1 | 1,09 Lrp1b          | JUC0200014898.mm.1 | 3,67  | 0,00046  | 0,298999                     |      |
| TC0200003447.mm.1 | 1,09 Lrp1b          | JUC0200014896.mm.1 | 3,13  | 0,001499 | 0,329714                     |      |
| TC0200003447.mm.1 | 1,09 Lrp1b          | PSR0200029618.mm.1 | 3,03  | 0,005875 | 0,383835 Cassette Exon       | 0,26 |
| TC0200003447.mm.1 | 1,09 Lrp1b          | PSR0200029622.mm.1 | 2,96  | 0,013929 | 0,446193 Cassette Exon       | 0,3  |
| TC0200003447.mm.1 | 1,09 Lrp1b          | PSR0200029590.mm.1 | 2,74  | 0,00359  | 0,356223 Cassette Exon       | 0,16 |
| TC0200003447.mm.1 | 1,09 Lrp1b          | JUC0200014975.mm.1 | 2,58  | 0,036078 | 0,529704                     |      |
| TC0200003447.mm.1 | 1,09 Lrp1b          | JUC0200014967.mm.1 | 2,55  | 0,004524 | 0,368648                     |      |
| TC0200003447.mm.1 | 1,09 Lrp1b          | JUC0200014972.mm.1 | 2,37  | 0,036486 | 0,531183                     |      |
| TC0200003447.mm.1 | 1,09 Lrp1b          | PSR0200029595.mm.1 | 2,14  | 0,017583 | 0,464264 Cassette Exon       | 0,12 |
| TC0200003447.mm.1 | 1,09 Lrp1b          | JUC0200014976.mm.1 | 2,07  | 0,046369 | 0,556313                     |      |
| TC0200003447.mm.1 | 1,09 Lrp1b          | JUC0200014928.mm.1 | -3,08 | 0,031145 | 0,515638                     |      |
| TC1300002287.mm.1 | -1,49 Adamts16      | JUC1300007840.mm.1 | 3,67  | 0,047401 | 0,558302                     |      |
| TC0100000493.mm.1 | -1,1 9530026F06Rik  | JUC0100002363.mm.1 | 3,67  | 0,017759 | 0,465425                     |      |
| TC1600000948.mm.1 | 1                   | JUC1600003884.mm.1 | 3,67  | 0,010237 | 0,420128                     |      |
| TC0500002877.mm.1 | -1,43 1700016H13Rik | JUC0500013818.mm.1 | 3,67  | 0,035309 | 0,528381                     |      |
| TC0500002877.mm.1 | -1,43 1700016H13Rik | JUC0500013819.mm.1 | 2,62  | 0,001927 | 0,34017                      |      |
| TC0600000396.mm.1 | -1,18 8030453O22Rik | JUC0600001536.mm.1 | 3,67  | 0,034818 | 0,526823                     |      |
| TC1800000261.mm.1 | 2,31 Bin1           | JUC1800001119.mm.1 | 3,66  | 0,001669 | 0,335182                     |      |
| TC1800000261.mm.1 | 2,31 Bin1           | PSR1800001875.mm.1 | 3,6   | 0,000394 | 0,29748 Cassette Exon        | 0,6  |
| TC1800000261.mm.1 | 2,31 Bin1           | JUC1800001118.mm.1 | 2,37  | 0,027463 | 0,504045                     |      |
| TC1800000261.mm.1 | 2,31 Bin1           | PSR1800001885.mm.1 | -2,02 | 0,012648 | 0,436303 Cassette Exon       | 0,18 |
| TC1800000261.mm.1 | 2,31 Bin1           | JUC1800001115.mm.1 | -2,02 | 0,049549 | 0,563325                     |      |
| TC1800000261.mm.1 | 2,31 Bin1           | PSR1800001884.mm.1 | -2,61 | 0,016851 | 0,460797 Cassette Exon       | 0,33 |
| TC1800000261.mm.1 | 2,31 Bin1           | JUC1800001109.mm.1 | -3,57 | 0,029312 | 0,509874                     |      |
| TC1800000261.mm.1 | 2,31 Bin1           | JUC1800001124.mm.1 | -4,71 | 0,000701 | 0,30566                      |      |
| TC0200005155.mm.1 | 1,66 Zmynd8         | JUC0200022743.mm.1 | 3,66  | 0,027006 | 0,502955                     |      |
| TC0200005155.mm.1 | 1,66 Zmynd8         | JUC0200022744.mm.1 | 3,15  | 0,007673 | 0,402377                     |      |
| TC0200005155.mm.1 | 1,66 Zmynd8         | JUC0200022763.mm.1 | -2,04 | 0,000656 | 0,304044                     |      |
| TC0200005155.mm.1 | 1,66 Zmynd8         | JUC0200022762.mm.1 | -2,09 | 0,035012 | 0,527415                     |      |



|                   |               |                    |        |          |                              |      |
|-------------------|---------------|--------------------|--------|----------|------------------------------|------|
| TC0200005155.mm.1 | 1,66 Zmynd8   | PSR0200044097.mm.1 | -2,13  | 0,027239 | 0,503642 Cassette Exon       | 0,09 |
| TC0200005155.mm.1 | 1,66 Zmynd8   | PSR0200044098.mm.1 | -2,16  | 0,002432 | 0,349135 Cassette Exon       | 0,09 |
| TC0200005155.mm.1 | 1,66 Zmynd8   | JUC0200022747.mm.1 | -2,17  | 0,001549 | 0,330631                     |      |
| TC0200005155.mm.1 | 1,66 Zmynd8   | PSR0200044106.mm.1 | -2,2   | 0,046348 | 0,556272 Alternative 3' Acce | 0,19 |
| TC0200005155.mm.1 | 1,66 Zmynd8   | PSR0200044115.mm.1 | -2,35  | 0,015755 | 0,455437 Alternative 5' Donc | 0,11 |
| TC0200005155.mm.1 | 1,66 Zmynd8   | PSR0200044104.mm.1 | -2,38  | 0,031783 | 0,517596 Cassette Exon       | 0,17 |
| TC0200005155.mm.1 | 1,66 Zmynd8   | PSR0200044099.mm.1 | -2,51  | 0,014776 | 0,450801 Alternative 5' Donc | 0,06 |
| TC0200005155.mm.1 | 1,66 Zmynd8   | JUC0200022741.mm.1 | -2,58  | 0,00053  | 0,304044                     |      |
| TC0200005155.mm.1 | 1,66 Zmynd8   | PSR0200044117.mm.1 | -4     | 0,000126 | 0,270905 Cassette Exon       | 0,26 |
| TC0600001111.mm.1 | 1,19          | PSR0600008734.mm.1 | 3,66   | 0,010457 | 0,421652 Cassette Exon       | 0,25 |
| TC0400002289.mm.1 | 1,52 Prdm13   | PSR0400018934.mm.1 | 3,66   | 0,001429 | 0,327447 Cassette Exon       | 0,22 |
| TC1900001753.mm.1 | 1,13 Sfxn4    | JUC1900008615.mm.1 | 3,66   | 0,022431 | 0,486856                     |      |
| TC1900001753.mm.1 | 1,13 Sfxn4    | JUC1900008607.mm.1 | 3,11   | 0,029355 | 0,509995                     |      |
| TC0400002705.mm.1 | 1,31 lkbkap   | JUC0400011306.mm.1 | 3,66   | 0,006189 | 0,387873                     |      |
| TC0600001268.mm.1 | 11,84 Slc6a1  | JUC0600005169.mm.1 | 3,65   | 0,007637 | 0,402113                     |      |
| TC0600001268.mm.1 | 11,84 Slc6a1  | JUC0600005162.mm.1 | 2,17   | 0,011428 | 0,427656                     |      |
| TC0600001268.mm.1 | 11,84 Slc6a1  | PSR0600009990.mm.1 | -2,15  | 0,000069 | 0,250992 Cassette Exon       | 0,25 |
| TC0600001268.mm.1 | 11,84 Slc6a1  | PSR0600009980.mm.1 | -2,18  | 0,028616 | 0,507749 Cassette Exon       | 0,21 |
| TC0600001268.mm.1 | 11,84 Slc6a1  | PSR0600009974.mm.1 | -2,2   | 0,010137 | 0,419217 Cassette Exon       | 0,17 |
| TC0600001268.mm.1 | 11,84 Slc6a1  | JUC0600005160.mm.1 | -2,21  | 0,015014 | 0,452101                     |      |
| TC0600001268.mm.1 | 11,84 Slc6a1  | JUC0600005164.mm.1 | -2,28  | 0,049305 | 0,562723                     |      |
| TC0600001268.mm.1 | 11,84 Slc6a1  | PSR0600009975.mm.1 | -2,44  | 0,002095 | 0,342919 Alternative 3' Acce | 0,41 |
| TC0600001268.mm.1 | 11,84 Slc6a1  | PSR0600009979.mm.1 | -2,47  | 0,000772 | 0,308801 Cassette Exon       | 0,1  |
| TC0600001268.mm.1 | 11,84 Slc6a1  | PSR0600009983.mm.1 | -2,54  | 0,006814 | 0,39387 Cassette Exon        | 0,27 |
| TC0600001268.mm.1 | 11,84 Slc6a1  | JUC0600005161.mm.1 | -2,74  | 0,006879 | 0,394271                     |      |
| TC0600001268.mm.1 | 11,84 Slc6a1  | PSR0600009988.mm.1 | -7,05  | 0,003039 | 0,353826 Alternative 5' Donc | 0,49 |
| TC0600001268.mm.1 | 11,84 Slc6a1  | JUC0600005166.mm.1 | -7,71  | 0,000242 | 0,28803                      |      |
| TC0600001268.mm.1 | 11,84 Slc6a1  | PSR0600009981.mm.1 | -7,78  | 0,004637 | 0,37015 Alternative 5' Donc  | 0,29 |
| TC0600001268.mm.1 | 11,84 Slc6a1  | JUC0600005168.mm.1 | -9,03  | 0,002713 | 0,349612                     |      |
| TC0600001268.mm.1 | 11,84 Slc6a1  | JUC0600005173.mm.1 | -12,71 | 0,000695 | 0,305213                     |      |
| TC0600001268.mm.1 | 11,84 Slc6a1  | PSR0600009972.mm.1 | -15,01 | 0,001741 | 0,335996 Cassette Exon       | 0,28 |
| TC0600001268.mm.1 | 11,84 Slc6a1  | PSR0600009976.mm.1 | -38,44 | 0,002704 | 0,349612 Intron Retention    | 0,57 |
| TC1100001728.mm.1 | -1,34 Myl4    | JUC1100008460.mm.1 | 3,65   | 0,011933 | 0,431703                     |      |
| TC1100001728.mm.1 | -1,34 Myl4    | PSR1100016339.mm.1 | -3,33  | 0,040455 | 0,542112 Alternative 3' Acce | 0,37 |
| TC0600002331.mm.1 | -1,41 Pde1c   | JUC0600009530.mm.1 | 3,65   | 0,000967 | 0,313456                     |      |
| TC0600002331.mm.1 | -1,41 Pde1c   | PSR0600018234.mm.1 | 2,7    | 0,030367 | 0,512923 Cassette Exon       | 0,28 |
| TC0100003565.mm.1 | -1,08 Atp1a4  | JUC0100016636.mm.1 | 3,65   | 0,033416 | 0,522793                     |      |
| TC0100003565.mm.1 | -1,08 Atp1a4  | PSR0100029283.mm.1 | 2,55   | 0,010387 | 0,421341 Cassette Exon       | 0,18 |
| TC0100003565.mm.1 | -1,08 Atp1a4  | JUC0100016647.mm.1 | -2,55  | 0,025553 | 0,497808                     |      |
| TC0200001976.mm.1 | 1,1 Ebf4      | JUC0200007879.mm.1 | 3,65   | 0,018295 | 0,468049                     |      |
| TC0800002528.mm.1 | -1,11 Smarca5 | JUC0800010471.mm.1 | 3,65   | 0,036089 | 0,529716                     |      |
| TC0X00002741.mm.1 | 1,1 Hdac8     | JUC0X00008741.mm.1 | 3,65   | 0,031897 | 0,518021                     |      |
| TC1100001154.mm.1 | 6,64 BC030499 | JUC1100005602.mm.1 | 3,64   | 0,00137  | 0,32572                      |      |
| TC1100001154.mm.1 | 6,64 BC030499 | PSR1100010674.mm.1 | 2,44   | 0,000005 | 0,179072 Cassette Exon       | 0,22 |
| TC1100001154.mm.1 | 6,64 BC030499 | PSR1100010687.mm.1 | -2,02  | 0,03167  | 0,517405 Alternative 5' Donc | 0,08 |
| TC1100001154.mm.1 | 6,64 BC030499 | PSR1100010690.mm.1 | -2,15  | 0,000217 | 0,28803 Alternative 5' Donc  | 0,18 |
| TC1100001154.mm.1 | 6,64 BC030499 | PSR1100010671.mm.1 | -2,2   | 0,002148 | 0,343679 Cassette Exon       | 0,24 |
| TC1100001154.mm.1 | 6,64 BC030499 | PSR1100010673.mm.1 | -2,34  | 0,005594 | 0,381078 Intron Retention    | 0,34 |

|                   |               |                     |        |          |                              |      |
|-------------------|---------------|---------------------|--------|----------|------------------------------|------|
| TC1100001154.mm.1 | 6,64 BC030499 | PSR1100010667.mm.1  | -2,39  | 0,001514 | 0,330268 Cassette Exon       | 0,22 |
| TC1100001154.mm.1 | 6,64 BC030499 | PSR1100010666.mm.1  | -2,46  | 0,001139 | 0,317344 Cassette Exon       | 0,22 |
| TC1100001154.mm.1 | 6,64 BC030499 | JUC1100005599.mm.1  | -2,46  | 0,003188 | 0,354243                     |      |
| TC1100001154.mm.1 | 6,64 BC030499 | JUC1100005608.mm.1  | -2,7   | 0,003566 | 0,356223                     |      |
| TC1100001154.mm.1 | 6,64 BC030499 | PSR1100010677.mm.1  | -2,92  | 0,00337  | 0,354278 Intron Retention    | 0,48 |
| TC1100001154.mm.1 | 6,64 BC030499 | PSR1100010679.mm.1  | -2,93  | 0,00139  | 0,325997 Alternative 5' Donc | 0,39 |
| TC1100001154.mm.1 | 6,64 BC030499 | PSR1100010693.mm.1  | -3,8   | 0,000513 | 0,303579 Alternative 5' Donc | 0,18 |
| TC1100001154.mm.1 | 6,64 BC030499 | PSR1100010694.mm.1  | -4,86  | 0,006331 | 0,389463 Cassette Exon       | 0,41 |
| TC1100001154.mm.1 | 6,64 BC030499 | JUC1100005606.mm.1  | -6,05  | 0,003774 | 0,357586                     |      |
| TC1100001154.mm.1 | 6,64 BC030499 | PSR1100010681.mm.1  | -6,06  | 0,006041 | 0,386586 Alternative 5' Donc | 0,39 |
| TC1100001154.mm.1 | 6,64 BC030499 | JUC1100005611.mm.1  | -6,07  | 0,018058 | 0,46716                      |      |
| TC1100001154.mm.1 | 6,64 BC030499 | JUC1100005601.mm.1  | -6,37  | 0,002621 | 0,349612                     |      |
| TC1100001154.mm.1 | 6,64 BC030499 | JUC1100005610.mm.1  | -7,37  | 0,000974 | 0,314364                     |      |
| TC1100001154.mm.1 | 6,64 BC030499 | PSR1100010663.mm.1  | -8,76  | 0,001151 | 0,317344 Cassette Exon       | 0,35 |
| TC1100001154.mm.1 | 6,64 BC030499 | JUC1100005605.mm.1  | -9,17  | 0,001363 | 0,32572                      |      |
| TC1100001154.mm.1 | 6,64 BC030499 | PSR1100010660.mm.1  | -9,86  | 0,003463 | 0,355628 Cassette Exon       | 0,35 |
| TC1100001154.mm.1 | 6,64 BC030499 | PSR1100010692.mm.1  | -14,91 | 0,003376 | 0,354303 Alternative 5' Donc | 0,18 |
| TC0700004340.mm.1 | 2,33 Stx1b    | JUC0700019222.mm.1  | 3,64   | 0,032691 | 0,520439                     |      |
| TC0700004340.mm.1 | 2,33 Stx1b    | JUC0700019225.mm.1  | 2,41   | 0,026954 | 0,502779                     |      |
| TC0700004340.mm.1 | 2,33 Stx1b    | PSR0700036448.mm.1  | 2,31   | 0,005374 | 0,378731 Alternative 3' Acce | 0,21 |
| TC0700004340.mm.1 | 2,33 Stx1b    | PSR0700036453.mm.1  | 2,27   | 0,013019 | 0,439354 Cassette Exon       | 0,16 |
| TC0700004340.mm.1 | 2,33 Stx1b    | JUC0700019223.mm.1  | -2,17  | 0,00059  | 0,304044                     |      |
| TC0700004340.mm.1 | 2,33 Stx1b    | PSR0700036456.mm.1  | -2,23  | 0,005482 | 0,379939 Cassette Exon       | 0,17 |
| TC0700004340.mm.1 | 2,33 Stx1b    | PSR0700036452.mm.1  | -2,49  | 0,013319 | 0,441836 Intron Retention    | 0,27 |
| TC0700004340.mm.1 | 2,33 Stx1b    | PSR0700036463.mm.1  | -2,5   | 0,002618 | 0,349612 Alternative 5' Donc | 0,14 |
| TC1100000234.mm.1 | -1,09 Cct4    | JUC1100000980.mm.1  | 3,64   | 0,006127 | 0,387351                     |      |
| TC1100000234.mm.1 | -1,09 Cct4    | JUC1100000973.mm.1  | 2,62   | 0,011294 | 0,427117                     |      |
| TC1100000234.mm.1 | -1,09 Cct4    | JUC1100000971.mm.1  | 2,07   | 0,019966 | 0,476202                     |      |
| TC1100000234.mm.1 | -1,09 Cct4    | PSR1100001902.mm.1  | 2,01   | 0,001067 | 0,316361 Alternative 5' Donc | 0,14 |
| TC0200002566.mm.1 | -1,49         | JUC0200010708.mm.1  | 3,64   | 0,030057 | 0,511847                     |      |
| TC0600001082.mm.1 | 1,12 Hdac11   | JUC0600004289.mm.1  | 3,64   | 0,027223 | 0,503582                     |      |
| TC0600001082.mm.1 | 1,12 Hdac11   | JUC0600004288.mm.1  | -2,15  | 0,01761  | 0,464312                     |      |
| TC0600001082.mm.1 | 1,12 Hdac11   | JUC0600004294.mm.1  | -3,95  | 0,022809 | 0,488243                     |      |
| TC0X00000298.mm.1 | -1,31         | JUC0X00000975.mm.1  | 3,64   | 0,029324 | 0,509941                     |      |
| TC0400001472.mm.1 | 1,1 AU040320  | JUC0400005840.mm.1  | 3,64   | 0,006635 | 0,392813                     |      |
| TC0400001472.mm.1 | 1,1 AU040320  | JUC0400005846.mm.1  | -4,89  | 0,014776 | 0,450801                     |      |
| TC1000001171.mm.1 | -1,11 Eea1    | JUC1000004789.mm.1  | 3,64   | 0,016179 | 0,457969                     |      |
| TC0X00002709.mm.1 | -1,09 Tex11   | JUC0X000008615.mm.1 | 3,64   | 0,02535  | 0,497375                     |      |
| TC1000002448.mm.1 | 3,28 Agpat3   | PSR1000017856.mm.1  | 3,63   | 0,006805 | 0,393762 Cassette Exon       | 0,47 |
| TC1000002448.mm.1 | 3,28 Agpat3   | JUC1000009822.mm.1  | 3,2    | 0,007177 | 0,397855                     |      |
| TC1000002448.mm.1 | 3,28 Agpat3   | JUC1000009820.mm.1  | -2,11  | 0,014875 | 0,451677                     |      |
| TC1000002448.mm.1 | 3,28 Agpat3   | PSR1000017853.mm.1  | -2,24  | 0,003759 | 0,357586 Cassette Exon       | 0,03 |
| TC1000002448.mm.1 | 3,28 Agpat3   | PSR1000017857.mm.1  | -2,49  | 0,008337 | 0,406435 Cassette Exon       | 0,1  |
| TC1000002448.mm.1 | 3,28 Agpat3   | JUC1000009816.mm.1  | -2,76  | 0,021114 | 0,480564                     |      |
| TC1000002448.mm.1 | 3,28 Agpat3   | PSR1000017862.mm.1  | -2,79  | 0,020664 | 0,478862 Cassette Exon       | 0,3  |
| TC1000002448.mm.1 | 3,28 Agpat3   | PSR1000017868.mm.1  | -2,83  | 0,013004 | 0,439291 Cassette Exon       | 0,3  |
| TC1000002448.mm.1 | 3,28 Agpat3   | JUC1000009814.mm.1  | -2,88  | 0,044318 | 0,551368                     |      |
| TC1000002448.mm.1 | 3,28 Agpat3   | PSR1000017866.mm.1  | -3,37  | 0,009207 | 0,414013                     |      |

|                   |                     |                    |       |          |                              |      |
|-------------------|---------------------|--------------------|-------|----------|------------------------------|------|
| TC1000002448.mm.1 | 3,28 Agpat3         | JUC1000009817.mm.1 | -3,48 | 0,004911 | 0,372662                     |      |
| TC1000002448.mm.1 | 3,28 Agpat3         | PSR1000017858.mm.1 | -4,38 | 0,011281 | 0,426885 Cassette Exon       | 0,36 |
| TC1000002448.mm.1 | 3,28 Agpat3         | JUC1000009823.mm.1 | -4,5  | 0,014152 | 0,447466                     |      |
| TC1000002448.mm.1 | 3,28 Agpat3         | JUC1000009819.mm.1 | -4,81 | 0,000832 | 0,311886                     |      |
| TC1000002448.mm.1 | 3,28 Agpat3         | PSR1000017865.mm.1 | -5,05 | 0,035369 | 0,528536                     |      |
| TC1100003222.mm.1 | -2,06 Serpinf1      | JUC1100015524.mm.1 | 3,63  | 0,000728 | 0,306408                     |      |
| TC1100003222.mm.1 | -2,06 Serpinf1      | PSR1100029650.mm.1 | 2,45  | 0,004202 | 0,363236 Alternative 3' Acce | 0,23 |
| TC1100003222.mm.1 | -2,06 Serpinf1      | PSR1100029659.mm.1 | 2,36  | 0,017903 | 0,466466 Alternative 3' Acce | 0,22 |
| TC1100003222.mm.1 | -2,06 Serpinf1      | PSR1100029664.mm.1 | 2,3   | 0,009421 | 0,415976 Cassette Exon       | 0,19 |
| TC1100003222.mm.1 | -2,06 Serpinf1      | PSR1100029666.mm.1 | 2,17  | 0,00045  | 0,297771 Cassette Exon       | 0,12 |
| TC0500003687.mm.1 | 2,12                | PSR0500033690.mm.1 | 3,63  | 0,007991 | 0,403853                     |      |
| TC0500003687.mm.1 | 2,12                | JUC0500018289.mm.1 | 3,51  | 0,005024 | 0,374162                     |      |
| TC0500003687.mm.1 | 2,12                | PSR0500033692.mm.1 | 2,08  | 0,018393 | 0,468484 Cassette Exon       | 0,21 |
| TC0500003205.mm.1 | -1,09 Tctn1         | JUC0500015591.mm.1 | 3,63  | 0,013976 | 0,446242                     |      |
| TC0500003205.mm.1 | -1,09 Tctn1         | PSR0500028630.mm.1 | 2,07  | 0,028465 | 0,507299 Alternative 3' Acce | 0,17 |
| TC0200004822.mm.1 | -1,49               | JUC0200021277.mm.1 | 3,63  | 0,027532 | 0,504339                     |      |
| TC1900000654.mm.1 | -1,16 Pax2          | JUC1900003079.mm.1 | 3,63  | 0,003825 | 0,358333                     |      |
| TC0200003026.mm.1 | 1,73 A930004D18Rik  | PSR0200024960.mm.1 | 3,62  | 0,028031 | 0,505851 Alternative 3' Acce | 0,3  |
| TC0200003026.mm.1 | 1,73 A930004D18Rik  | PSR0200024957.mm.1 | -2,23 | 0,007819 | 0,403089 Cassette Exon       | 0,16 |
| TC0200003026.mm.1 | 1,73 A930004D18Rik  | JUC0200012634.mm.1 | -3,05 | 0,015313 | 0,453561                     |      |
| TC1700001289.mm.1 | 1,42 Prkce          | JUC1700006452.mm.1 | 3,62  | 0,023915 | 0,492316                     |      |
| TC1700001289.mm.1 | 1,42 Prkce          | PSR1700011792.mm.1 | 2,17  | 0,041819 | 0,545586 Cassette Exon       | 0,08 |
| TC1700001289.mm.1 | 1,42 Prkce          | PSR1700011803.mm.1 | 2,06  | 0,012966 | 0,439129 Cassette Exon       | 0,09 |
| TC1700001289.mm.1 | 1,42 Prkce          | JUC1700006457.mm.1 | -2,07 | 0,016916 | 0,460832                     |      |
| TC0900001563.mm.1 | -1,39 Itga9         | JUC0900007302.mm.1 | 3,62  | 0,021727 | 0,484124                     |      |
| TC0900001563.mm.1 | -1,39 Itga9         | JUC0900007303.mm.1 | 3,21  | 0,029629 | 0,510558                     |      |
| TC0900001563.mm.1 | -1,39 Itga9         | JUC0900007301.mm.1 | 2,85  | 0,024307 | 0,49362                      |      |
| TC1400000798.mm.1 | -1,23 Cma2          | JUC1400003458.mm.1 | 3,61  | 0,020039 | 0,476453                     |      |
| TC0100001870.mm.1 | -1,02 4930570N18Rik | JUC0100008819.mm.1 | 3,61  | 0,001682 | 0,335182                     |      |
| TC0500000052.mm.1 | -1,06 Abcb1b        | JUC0500000241.mm.1 | 3,61  | 0,003584 | 0,356223                     |      |
| TC0500000052.mm.1 | -1,06 Abcb1b        | JUC0500000267.mm.1 | 2,42  | 0,046264 | 0,556183                     |      |
| TC1800000655.mm.1 | 1,54 Wdr7           | PSR1800004824.mm.1 | 3,6   | 0,006183 | 0,387873 Cassette Exon       | 0,49 |
| TC1800000655.mm.1 | 1,54 Wdr7           | JUC1800002691.mm.1 | 3,34  | 0,033498 | 0,522941                     |      |
| TC1800000655.mm.1 | 1,54 Wdr7           | JUC1800002692.mm.1 | 3,33  | 0,007608 | 0,401767                     |      |
| TC1800000655.mm.1 | 1,54 Wdr7           | JUC1800002680.mm.1 | 2,65  | 0,010316 | 0,420661                     |      |
| TC1500001183.mm.1 | 3,17 Slc1a3         | JUC1500005378.mm.1 | 3,6   | 0,0319   | 0,518021                     |      |
| TC1500001183.mm.1 | 3,17 Slc1a3         | JUC1500005376.mm.1 | 2,84  | 0,014271 | 0,448053                     |      |
| TC1500001183.mm.1 | 3,17 Slc1a3         | PSR1500009528.mm.1 | -2,85 | 0,032735 | 0,52047 Alternative 5' Donc  | 0,3  |
| TC1500001183.mm.1 | 3,17 Slc1a3         | PSR1500009530.mm.1 | -3,67 | 0,044073 | 0,550881 Cassette Exon       | 0,42 |
| TC1500001183.mm.1 | 3,17 Slc1a3         | PSR1500009543.mm.1 | -5,62 | 0,016661 | 0,460023 Cassette Exon       | 0,33 |
| TC0700000557.mm.1 | 3,36 Clip3          | JUC0700002382.mm.1 | 3,6   | 0,003211 | 0,354243                     |      |
| TC0700000557.mm.1 | 3,36 Clip3          | JUC0700002383.mm.1 | 2,47  | 0,019349 | 0,47345                      |      |
| TC0700000557.mm.1 | 3,36 Clip3          | JUC0700002375.mm.1 | 2,17  | 0,02892  | 0,50858                      |      |
| TC0700000557.mm.1 | 3,36 Clip3          | JUC0700002380.mm.1 | 2,07  | 0,01921  | 0,472971                     |      |
| TC0700000557.mm.1 | 3,36 Clip3          | PSR0700004769.mm.1 | -3,6  | 0,042418 | 0,547627 Alternative 5' Donc | 0,41 |
| TC1700002817.mm.1 | -1,36 C2            | JUC1700009782.mm.1 | 3,6   | 0,025808 | 0,498589                     |      |
| TC1600002139.mm.1 | 1,4 Hmgn1           | PSR1600016485.mm.1 | 3,6   | 0,001344 | 0,325349                     |      |
| TC1300000113.mm.1 | 1,23 Inhba          | PSR1300000833.mm.1 | 3,59  | 0,035931 | 0,529399 Alternative 5' Donc | 0,4  |

|                   |                              |                    |       |          |          |                          |
|-------------------|------------------------------|--------------------|-------|----------|----------|--------------------------|
| TC0500000726.mm.1 | -1,06 C530008M17Rik; A73008! | JUC0500003581.mm.1 | 3,59  | 0,002412 | 0,348816 |                          |
| TC0500000726.mm.1 | -1,06 C530008M17Rik; A73008! | PSR0500006533.mm.1 | 2,05  | 0,006056 | 0,386642 | Alternative 5' Donc 0,17 |
| TC0200001760.mm.1 | -1,16 Rad51                  | JUC0200006555.mm.1 | 3,59  | 0,018599 | 0,469657 |                          |
| TC0900000917.mm.1 | -1,05 Ice2; Narg2            | JUC0900003817.mm.1 | 3,59  | 0,025583 | 0,497808 |                          |
| TC1400001882.mm.1 | -1,19 Gm5930                 | JUC1400007811.mm.1 | 3,58  | 0,020946 | 0,47998  |                          |
| TC1200001490.mm.1 | -1,06 Adam17                 | JUC1200005778.mm.1 | 3,58  | 0,047149 | 0,557948 |                          |
| TC0800002793.mm.1 | -1,31                        | JUC0800011655.mm.1 | 3,58  | 0,020714 | 0,479166 |                          |
| TC0400004018.mm.1 | 1,03 Ptchd2                  | JUC0400017346.mm.1 | 3,58  | 0,007173 | 0,397855 |                          |
| TC0400004018.mm.1 | 1,03 Ptchd2                  | JUC0400017354.mm.1 | -2,29 | 0,023308 | 0,49004  |                          |
| TC0500000589.mm.1 | -1,29 Pgm1                   | PSR0500005218.mm.1 | 3,57  | 0,002838 | 0,352207 | Alternative 5' Donc 0,41 |
| TC0300000272.mm.1 | 1,42 4932438A13Rik           | PSR0300001884.mm.1 | 3,57  | 0,000833 | 0,311886 | Cassette Exon 0,32       |
| TC0300000272.mm.1 | 1,42 4932438A13Rik           | JUC0300000959.mm.1 | 2,78  | 0,027044 | 0,502979 |                          |
| TC0300000272.mm.1 | 1,42 4932438A13Rik           | JUC0300000972.mm.1 | 2,25  | 0,003508 | 0,355749 |                          |
| TC0300000272.mm.1 | 1,42 4932438A13Rik           | JUC0300000962.mm.1 | -2,22 | 0,008525 | 0,407684 |                          |
| TC0600000937.mm.1 | -1,05 Atp6v1b1               | JUC0600003629.mm.1 | 3,57  | 0,001107 | 0,317328 |                          |
| TC0600000937.mm.1 | -1,05 Atp6v1b1               | JUC0600003637.mm.1 | -2,55 | 0,019467 | 0,474209 |                          |
| TC0100001373.mm.1 | 1,63 Nmnat2                  | JUC0100006550.mm.1 | 3,56  | 0,021406 | 0,482126 |                          |
| TC0100001373.mm.1 | 1,63 Nmnat2                  | PSR0100011356.mm.1 | 2,41  | 0,00278  | 0,351017 | Cassette Exon 0,25       |
| TC1500002048.mm.1 | 1,02 Sbf1                    | JUC1500009356.mm.1 | 3,56  | 0,03513  | 0,527805 |                          |
| TC1500002048.mm.1 | 1,02 Sbf1                    | JUC1500009365.mm.1 | 3,04  | 0,006764 | 0,393343 |                          |
| TC1500002048.mm.1 | 1,02 Sbf1                    | PSR1500016457.mm.1 | 2,44  | 0,024719 | 0,494838 | Cassette Exon 0,23       |
| TC1900001710.mm.1 | -1,22 Afap112                | JUC1900008402.mm.1 | 3,56  | 0,011303 | 0,427133 |                          |
| TC1900001710.mm.1 | -1,22 Afap112                | PSR1900015065.mm.1 | -2,03 | 0,044128 | 0,551013 | Cassette Exon 0,11       |
| TC1400002111.mm.1 | -1,48 Mcpt9                  | JUC1400008873.mm.1 | 3,56  | 0,032401 | 0,519282 |                          |
| TC1600001580.mm.1 | -1,42 Cd86                   | JUC1600006705.mm.1 | 3,56  | 0,00799  | 0,403853 |                          |
| TC0700000894.mm.1 | -1,48 Zdhhc13                | JUC0700003987.mm.1 | 3,56  | 0,009617 | 0,417315 |                          |
| TC0300002705.mm.1 | 1,17                         | JUC0300010960.mm.1 | 3,56  | 0,028101 | 0,506104 |                          |
| TC1000001891.mm.1 | 1 Gm15270                    | JUC1000007388.mm.1 | 3,56  | 0,046451 | 0,556553 |                          |
| TC1000001891.mm.1 | 1 Gm15270                    | JUC1000007389.mm.1 | 3,56  | 0,015143 | 0,452699 |                          |
| TC1800000956.mm.1 | -1,2 Mpp7                    | PSR1800007075.mm.1 | 3,55  | 0,016753 | 0,460383 | Cassette Exon 0,27       |
| TC0400000836.mm.1 | 1,29 Ccdc171                 | JUC0400002893.mm.1 | 3,55  | 0,004274 | 0,363868 |                          |
| TC0400000836.mm.1 | 1,29 Ccdc171                 | JUC0400002897.mm.1 | 2,15  | 0,019511 | 0,474538 |                          |
| TC0400000836.mm.1 | 1,29 Ccdc171                 | PSR0400005715.mm.1 | 2,06  | 0,006659 | 0,393187 | Cassette Exon 0,18       |
| TC0X00003163.mm.1 | 1,22                         | PSR0X00019816.mm.1 | 3,55  | 0,001628 | 0,332831 | Cassette Exon 0,18       |
| TC0X00003163.mm.1 | 1,22                         | JUC0X00010017.mm.1 | -2,14 | 0,023433 | 0,490383 |                          |
| TC0200003801.mm.1 | 1,22 Pde11a                  | JUC0200016542.mm.1 | 3,55  | 0,037113 | 0,532942 |                          |
| TC0900002368.mm.1 | -1,06 Ppcdc                  | JUC0900011193.mm.1 | 3,55  | 0,026196 | 0,50003  |                          |
| TC0900002541.mm.1 | -1,67 Tpm1                   | PSR0900021342.mm.1 | 3,54  | 0,020456 | 0,478018 | Cassette Exon 0,26       |
| TC0900002541.mm.1 | -1,67 Tpm1                   | PSR0900021316.mm.1 | 3,04  | 0,005942 | 0,385164 | Alternative 3' Acce 0,27 |
| TC0900002541.mm.1 | -1,67 Tpm1                   | PSR0900021336.mm.1 | 2,33  | 0,03219  | 0,518843 | Intron Retention 0,26    |
| TC0900002541.mm.1 | -1,67 Tpm1                   | JUC0900011989.mm.1 | 2,04  | 0,039882 | 0,54093  |                          |
| TC0700001253.mm.1 | 1,85 Grm5; C030032F19Rik     | JUC0700005615.mm.1 | 3,54  | 0,031668 | 0,517405 |                          |
| TC0700001253.mm.1 | 1,85 Grm5; C030032F19Rik     | PSR0700010845.mm.1 | 2,32  | 0,010173 | 0,419711 | Alternative 3' Acce 0,21 |
| TC0700001253.mm.1 | 1,85 Grm5; C030032F19Rik     | JUC0700005611.mm.1 | -2,08 | 0,014582 | 0,449876 |                          |
| TC0700001253.mm.1 | 1,85 Grm5; C030032F19Rik     | PSR0700010858.mm.1 | -2,23 | 0,015689 | 0,455416 | Alternative 5' Donc 0,16 |
| TC0700001253.mm.1 | 1,85 Grm5; C030032F19Rik     | PSR0700010850.mm.1 | -2,31 | 0,004627 | 0,369794 | Cassette Exon 0,05       |
| TC0700001253.mm.1 | 1,85 Grm5; C030032F19Rik     | PSR0700010841.mm.1 | -2,89 | 0,005544 | 0,380631 | Cassette Exon 0,17       |
| TC0700001253.mm.1 | 1,85 Grm5; C030032F19Rik     | PSR0700010842.mm.1 | -2,95 | 0,003135 | 0,353892 | Cassette Exon 0,17       |

|                   |       |               |                    |       |          |          |                     |      |
|-------------------|-------|---------------|--------------------|-------|----------|----------|---------------------|------|
| TC100001826.mm.1  | 1,69  | 4930405J17Rik | PSR1000013290.mm.1 | 3,54  | 0,00131  | 0,323877 | Cassette Exon       | 0,2  |
| TC0800000932.mm.1 | -1,11 | Ddx39         | JUC0800003660.mm.1 | 3,54  | 0,022591 | 0,487325 |                     |      |
| TC0800000932.mm.1 | -1,11 | Ddx39         | JUC0800003649.mm.1 | 2,46  | 0,002414 | 0,348907 |                     |      |
| TC0700002692.mm.1 | -1,1  | Dll3          | JUC0700012474.mm.1 | 3,54  | 0,013322 | 0,441836 |                     |      |
| TC0X00000660.mm.1 | -1,19 | Prrg3         | JUC0X00002096.mm.1 | 3,54  | 0,032116 | 0,518585 |                     |      |
| TC0900002516.mm.1 | 1,26  | Zfp609        | JUC0900011870.mm.1 | 3,54  | 0,036137 | 0,529805 |                     |      |
| TC0900002516.mm.1 | 1,26  | Zfp609        | JUC0900011872.mm.1 | 2,29  | 0,028482 | 0,50733  |                     |      |
| TC0400001486.mm.1 | 1,25  | Dlgap3        | JUC0400005898.mm.1 | 3,54  | 0,021236 | 0,481319 |                     |      |
| TC0200000319.mm.1 | -1,43 | Etl4          | JUC0200000660.mm.1 | 3,53  | 0,003596 | 0,356223 |                     |      |
| TC0200000319.mm.1 | -1,43 | Etl4          | PSR0200001510.mm.1 | 3,18  | 0,017401 | 0,463753 | Alternative 5' Donc | 0,33 |
| TC0200000319.mm.1 | -1,43 | Etl4          | PSR0200001493.mm.1 | 2,48  | 0,012166 | 0,432998 | Cassette Exon       | 0,25 |
| TC0200000319.mm.1 | -1,43 | Etl4          | PSR0200001505.mm.1 | 2,28  | 0,001688 | 0,335346 | Cassette Exon       | 0,09 |
| TC0200004356.mm.1 | 1,05  | Ryr3          | JUC0200018586.mm.1 | 3,53  | 0,018624 | 0,46991  |                     |      |
| TC0200004356.mm.1 | 1,05  | Ryr3          | JUC0200018538.mm.1 | 3,47  | 0,007352 | 0,399281 |                     |      |
| TC0200004356.mm.1 | 1,05  | Ryr3          | JUC0200018584.mm.1 | 2,57  | 0,023115 | 0,489756 |                     |      |
| TC0200004356.mm.1 | 1,05  | Ryr3          | JUC0200018535.mm.1 | 2,02  | 0,007435 | 0,399934 |                     |      |
| TC0200004356.mm.1 | 1,05  | Ryr3          | JUC0200018638.mm.1 | -3,02 | 0,013783 | 0,444974 |                     |      |
| TC0200004356.mm.1 | 1,05  | Ryr3          | JUC0200018575.mm.1 | -3,06 | 0,027974 | 0,505748 |                     |      |
| TC1700000055.mm.1 | 1,68  | Tmem181a      | JUC1700000220.mm.1 | 3,53  | 0,006036 | 0,386586 |                     |      |
| TC1600001272.mm.1 | 1     |               | JUC1600005368.mm.1 | 3,53  | 0,02367  | 0,491379 |                     |      |
| TC0600002077.mm.1 | -1,06 | 9330158H04Rik | JUC0600008535.mm.1 | 3,53  | 0,021295 | 0,481714 |                     |      |
| TC0X00001800.mm.1 | 1,04  | Porcn         | JUC0X00005831.mm.1 | 3,53  | 0,004798 | 0,371408 |                     |      |
| TC0700004607.mm.1 | -1,3  | Fadd          | PSR0700039044.mm.1 | 3,52  | 0,046943 | 0,557545 | Alternative 5' Donc | 0,4  |
| TC0900002991.mm.1 | 1,41  | Atp2c1        | JUC0900013826.mm.1 | 3,52  | 0,042893 | 0,54819  |                     |      |
| TC0900002991.mm.1 | 1,41  | Atp2c1        | JUC0900013824.mm.1 | 3,11  | 0,026803 | 0,502337 |                     |      |
| TC0900002991.mm.1 | 1,41  | Atp2c1        | JUC0900013813.mm.1 | -2,52 | 0,017482 | 0,463964 |                     |      |
| TC0900002991.mm.1 | 1,41  | Atp2c1        | PSR0900024677.mm.1 | -2,93 | 0,027598 | 0,504485 | Alternative 5' Donc | 0,28 |
| TC1700000888.mm.1 | -1,42 | Dlk2          | PSR1700008461.mm.1 | 3,52  | 0,025496 | 0,497664 | Cassette Exon       | 0,24 |
| TC0900003268.mm.1 | -1,56 | Lyzl4         | JUC0900015516.mm.1 | 3,52  | 0,007479 | 0,400381 |                     |      |
| TC0900003268.mm.1 | -1,56 | Lyzl4         | PSR0900027547.mm.1 | 2,31  | 0,026243 | 0,500211 | Cassette Exon       | 0,11 |
| TC0200004433.mm.1 | -1,09 | Ino80         | JUC0200018967.mm.1 | 3,52  | 0,008798 | 0,409822 |                     |      |
| TC0700001910.mm.1 | 1,08  | Plekha1       | PSR0700016718.mm.1 | 3,51  | 0,038541 | 0,536695 | Alternative 5' Donc | 0,39 |
| TC0700003550.mm.1 | -2,52 | Gm26633       | JUC0700015811.mm.1 | 3,51  | 0,042679 | 0,548097 |                     |      |
| TC0700003550.mm.1 | -2,52 | Gm26633       | PSR0700029979.mm.1 | 2,74  | 0,013934 | 0,446202 | Cassette Exon       | 0,2  |
| TC1000001946.mm.1 | -1,93 | Hint3         | PSR1000013995.mm.1 | 3,5   | 0,014051 | 0,44654  | Cassette Exon       | 0,22 |
| TC1000001946.mm.1 | -1,93 | Hint3         | PSR1000013989.mm.1 | 2,16  | 0,020124 | 0,47686  | Cassette Exon       | 0,15 |
| TC0200004537.mm.1 | -1,24 | Atp8b4        | JUC0200020018.mm.1 | 3,5   | 0,026296 | 0,5006   |                     |      |
| TC0200004729.mm.1 | -1,2  | Esf1          | JUC0200020961.mm.1 | 3,5   | 0,00136  | 0,32572  |                     |      |
| TC0500001808.mm.1 | 1,11  | Pan3          | PSR0500016734.mm.1 | 3,5   | 0,026495 | 0,501252 |                     |      |
| TC0500001808.mm.1 | 1,11  | Pan3          | JUC0500009080.mm.1 | 2,38  | 0,018183 | 0,467441 |                     |      |
| TC0800002634.mm.1 | -1,41 | N4bp1         | JUC0800010996.mm.1 | 3,5   | 0,000134 | 0,270905 |                     |      |
| TC0800002634.mm.1 | -1,41 | N4bp1         | JUC0800010998.mm.1 | 2,08  | 0,029166 | 0,509333 |                     |      |
| TC0800002634.mm.1 | -1,41 | N4bp1         | JUC0800011004.mm.1 | 2,08  | 0,044287 | 0,551322 |                     |      |
| TC0700000412.mm.1 | 4,97  | Tmem145       | JUC0700001561.mm.1 | 3,49  | 0,00052  | 0,303623 |                     |      |
| TC0700000412.mm.1 | 4,97  | Tmem145       | PSR0700003163.mm.1 | 3,09  | 0,002702 | 0,349612 | Cassette Exon       | 0,08 |
| TC0700000412.mm.1 | 4,97  | Tmem145       | PSR0700003157.mm.1 | 2,05  | 0,006513 | 0,391376 | Cassette Exon       | 0,12 |
| TC0700000412.mm.1 | 4,97  | Tmem145       | PSR0700003173.mm.1 | -2,99 | 0,011192 | 0,426444 | Cassette Exon       | 0,23 |
| TC0700000412.mm.1 | 4,97  | Tmem145       | JUC0700001559.mm.1 | -3,36 | 0,002126 | 0,342919 |                     |      |

|                   |               |                    |        |          |                              |      |
|-------------------|---------------|--------------------|--------|----------|------------------------------|------|
| TC0700000412.mm.1 | 4,97 Tmem145  | PSR0700003156.mm.1 | -3,98  | 0,017647 | 0,464582 Cassette Exon       | 0,24 |
| TC0700000412.mm.1 | 4,97 Tmem145  | PSR0700003174.mm.1 | -4,04  | 0,008416 | 0,406611 Cassette Exon       | 0,28 |
| TC0700000412.mm.1 | 4,97 Tmem145  | PSR0700003160.mm.1 | -4,35  | 0,013748 | 0,444758 Intron Retention    | 0,5  |
| TC0700000412.mm.1 | 4,97 Tmem145  | JUC0700001565.mm.1 | -5,57  | 0,045311 | 0,553742                     |      |
| TC0700000412.mm.1 | 4,97 Tmem145  | JUC0700001557.mm.1 | -5,58  | 0,005107 | 0,376064                     |      |
| TC0700000412.mm.1 | 4,97 Tmem145  | JUC0700001558.mm.1 | -7,65  | 0,003771 | 0,357586                     |      |
| TC0700000412.mm.1 | 4,97 Tmem145  | JUC0700001554.mm.1 | -20,93 | 0,016524 | 0,459611                     |      |
| TC1100003644.mm.1 | 2,74 Gpr179   | JUC1100017528.mm.1 | 3,49   | 0,022906 | 0,488524                     |      |
| TC1100003644.mm.1 | 2,74 Gpr179   | JUC1100017530.mm.1 | 3,14   | 0,00863  | 0,408463                     |      |
| TC1100003644.mm.1 | 2,74 Gpr179   | PSR1100033486.mm.1 | 2,52   | 0,001567 | 0,331411 Cassette Exon       | 0,2  |
| TC1100003644.mm.1 | 2,74 Gpr179   | PSR1100033483.mm.1 | 2,05   | 0,015688 | 0,455416 Cassette Exon       | 0,08 |
| TC1100003644.mm.1 | 2,74 Gpr179   | JUC1100017526.mm.1 | 2,02   | 0,008932 | 0,411101                     |      |
| TC1100003644.mm.1 | 2,74 Gpr179   | JUC1100017532.mm.1 | -2,28  | 0,015912 | 0,456594                     |      |
| TC1100003644.mm.1 | 2,74 Gpr179   | JUC1100017529.mm.1 | -2,67  | 0,049003 | 0,561874                     |      |
| TC1100003644.mm.1 | 2,74 Gpr179   | PSR1100033484.mm.1 | -3     | 0,002647 | 0,349612 Cassette Exon       | 0,18 |
| TC1100003644.mm.1 | 2,74 Gpr179   | PSR1100033492.mm.1 | -3,39  | 0,003592 | 0,356223 Cassette Exon       | 0,32 |
| TC1100003644.mm.1 | 2,74 Gpr179   | PSR1100033495.mm.1 | -4,27  | 0,000356 | 0,290838 Alternative 5' Donc | 0,44 |
| TC1100003644.mm.1 | 2,74 Gpr179   | JUC1100017531.mm.1 | -5,37  | 0,007422 | 0,399901                     |      |
| TC0800000300.mm.1 | 1,68 Zmat4    | JUC0800001240.mm.1 | 3,49   | 0,009116 | 0,413187                     |      |
| TC0800000300.mm.1 | 1,68 Zmat4    | PSR0800002280.mm.1 | -2,43  | 0,013353 | 0,442045 Cassette Exon       | 0,13 |
| TC0800000300.mm.1 | 1,68 Zmat4    | PSR0800002279.mm.1 | -2,63  | 0,008978 | 0,411895 Cassette Exon       | 0,06 |
| TC0800000300.mm.1 | 1,68 Zmat4    | PSR0800002295.mm.1 | -3,52  | 0,012788 | 0,437236 Cassette Exon       | 0,23 |
| TC0800000300.mm.1 | 1,68 Zmat4    | JUC0800001243.mm.1 | -3,69  | 0,027297 | 0,503732                     |      |
| TC0800000300.mm.1 | 1,68 Zmat4    | PSR0800002275.mm.1 | -3,8   | 0,005115 | 0,376246 Cassette Exon       | 0,32 |
| TC0800000300.mm.1 | 1,68 Zmat4    | JUC0800001248.mm.1 | -5,92  | 0,041552 | 0,544924                     |      |
| TC0900002106.mm.1 | -1,38 Ubash3b | PSR0900017403.mm.1 | 3,49   | 0,020345 | 0,477323 Cassette Exon       | 0,25 |
| TC0900002106.mm.1 | -1,38 Ubash3b | PSR0900017397.mm.1 | 2,63   | 0,013619 | 0,444002 Cassette Exon       | 0,17 |
| TC0900002106.mm.1 | -1,38 Ubash3b | PSR0900017396.mm.1 | 2,39   | 0,025729 | 0,498173 Cassette Exon       | 0,14 |
| TC0300001476.mm.1 | -1,12 Col24a1 | PSR0300011870.mm.1 | 3,49   | 0,045287 | 0,553724 Cassette Exon       | 0,23 |
| TC0200004963.mm.1 | 1,54 Ggt7     | PSR0200042119.mm.1 | 3,49   | 0,034258 | 0,525276 Cassette Exon       | 0,22 |
| TC0200004963.mm.1 | 1,54 Ggt7     | PSR0200042105.mm.1 | -2,16  | 0,010512 | 0,422115 Cassette Exon       | 0,11 |
| TC0300000078.mm.1 | 1,79 Ralyl    | JUC0300000115.mm.1 | 3,49   | 0,014789 | 0,450876                     |      |
| TC0300000078.mm.1 | 1,79 Ralyl    | PSR0300000292.mm.1 | 3,08   | 0,005756 | 0,383101 Cassette Exon       | 0,19 |
| TC0300000078.mm.1 | 1,79 Ralyl    | PSR0300000296.mm.1 | -2,03  | 0,003806 | 0,358103 Cassette Exon       | 0,06 |
| TC0300000078.mm.1 | 1,79 Ralyl    | JUC0300000113.mm.1 | -2,09  | 0,001376 | 0,32572                      |      |
| TC0300000078.mm.1 | 1,79 Ralyl    | PSR0300000290.mm.1 | -2,11  | 0,040322 | 0,541841 Alternative 5' Donc | 0,15 |
| TC0300000078.mm.1 | 1,79 Ralyl    | PSR0300000285.mm.1 | -2,12  | 0,015772 | 0,455535                     |      |
| TC0300000078.mm.1 | 1,79 Ralyl    | PSR0300000294.mm.1 | -2,36  | 0,002798 | 0,352011 Alternative 3' Acce | 0,09 |
| TC0300000078.mm.1 | 1,79 Ralyl    | JUC0300000116.mm.1 | -3,16  | 0,008174 | 0,405614                     |      |
| TC0300000078.mm.1 | 1,79 Ralyl    | JUC0300000109.mm.1 | -3,25  | 0,006181 | 0,387873                     |      |
| TC1100003783.mm.1 | -1,08 Kcnh4   | JUC1100018253.mm.1 | 3,49   | 0,023021 | 0,489186                     |      |
| TC1100003783.mm.1 | -1,08 Kcnh4   | JUC1100018257.mm.1 | -2,31  | 0,000301 | 0,288663                     |      |
| TC1400002635.mm.1 | -1 Mycbp2     | JUC1400010884.mm.1 | 3,49   | 0,043354 | 0,549429                     |      |
| TC1400002635.mm.1 | -1 Mycbp2     | JUC1400010844.mm.1 | 2,54   | 0,023621 | 0,491012                     |      |
| TC1400002635.mm.1 | -1 Mycbp2     | JUC1400010877.mm.1 | 2,02   | 0,00105  | 0,316361                     |      |
| TC1100003691.mm.1 | -1,23         | JUC1100017803.mm.1 | 3,49   | 0,031541 | 0,517122                     |      |
| TC1000000479.mm.1 | -2,15 Pln     | JUC1000001755.mm.1 | 3,49   | 0,049651 | 0,563521                     |      |
| TC1600000745.mm.1 | 6,86 Impg2    | PSR1600006441.mm.1 | 3,48   | 0,019513 | 0,474538 Mutually Exclusive  | 0,45 |

|                   |                              |                    |        |          |                              |      |
|-------------------|------------------------------|--------------------|--------|----------|------------------------------|------|
| TC1600000745.mm.1 | 6,86 Impg2                   | PSR1600006444.mm.1 | 2,69   | 0,012205 | 0,433268 Cassette Exon       | 0,15 |
| TC1600000745.mm.1 | 6,86 Impg2                   | JUC1600003404.mm.1 | -2,18  | 0,037199 | 0,533261                     |      |
| TC1600000745.mm.1 | 6,86 Impg2                   | PSR1600006461.mm.1 | -2,5   | 0,007783 | 0,402902 Alternative 5' Donc | 0,23 |
| TC1600000745.mm.1 | 6,86 Impg2                   | PSR1600006440.mm.1 | -3,81  | 0,004359 | 0,365487 Mutually Exclusive  | 0,45 |
| TC1600000745.mm.1 | 6,86 Impg2                   | JUC1600003406.mm.1 | -4,87  | 0,003185 | 0,354243                     |      |
| TC1600000745.mm.1 | 6,86 Impg2                   | JUC1600003415.mm.1 | -7,99  | 0,005033 | 0,374447                     |      |
| TC1600000745.mm.1 | 6,86 Impg2                   | PSR1600006459.mm.1 | -8,5   | 0,000614 | 0,304044 Cassette Exon       | 0,44 |
| TC1600000745.mm.1 | 6,86 Impg2                   | JUC1600003414.mm.1 | -10,83 | 0,002821 | 0,352207                     |      |
| TC1600000745.mm.1 | 6,86 Impg2                   | JUC1600003409.mm.1 | -13,04 | 0,000612 | 0,304044                     |      |
| TC0300001227.mm.1 | -1,94                        | PSR0300009936.mm.1 | 3,48   | 0,048488 | 0,560864 Cassette Exon       | 0,23 |
| TC0300001227.mm.1 | -1,94                        | PSR0300009935.mm.1 | -3,48  | 0,048488 | 0,560864 Cassette Exon       | 0,23 |
| TC1200001509.mm.1 | 1,32 2410018L13Rik; 9030624C | PSR1200010561.mm.1 | 3,48   | 0,01025  | 0,420147 Cassette Exon       | 0,14 |
| TC1200001509.mm.1 | 1,32 2410018L13Rik; 9030624C | PSR1200010564.mm.1 | 2,49   | 0,003929 | 0,359818 Cassette Exon       | 0,2  |
| TC1900000420.mm.1 | -1,12                        | JUC1900002033.mm.1 | 3,48   | 0,01409  | 0,446971                     |      |
| TC0200000302.mm.1 | 1,05 Bmi1                    | JUC0200000592.mm.1 | 3,48   | 0,003104 | 0,353892                     |      |
| TC0700002483.mm.1 | 1,1 Mark4                    | JUC0700011645.mm.1 | 3,48   | 0,012846 | 0,437777                     |      |
| TC0700002483.mm.1 | 1,1 Mark4                    | JUC0700011649.mm.1 | -2,95  | 0,030144 | 0,512049                     |      |
| TC0700002901.mm.1 | 1,09 A230077H06Rik           | PSR0700025832.mm.1 | 3,47   | 0,003532 | 0,356184 Alternative 3' Acce | 0,38 |
| TC1100003855.mm.1 | -1,11 Eftud2                 | PSR1100035963.mm.1 | 3,47   | 0,034692 | 0,526294 Alternative 5' Donc | 0,38 |
| TC0800000930.mm.1 | -2,18 Gipc1                  | PSR0800006866.mm.1 | 3,47   | 0,033212 | 0,522175 Cassette Exon       | 0,32 |
| TC0800000930.mm.1 | -2,18 Gipc1                  | JUC0800003641.mm.1 | 3,13   | 0,025716 | 0,498173                     |      |
| TC0800000930.mm.1 | -2,18 Gipc1                  | PSR0800006868.mm.1 | 2,57   | 0,029703 | 0,51095 Cassette Exon        | 0,22 |
| TC100002238.mm.1  | -1,56 Gm20610; Gm20625       | JUC100008597.mm.1  | 3,47   | 0,000229 | 0,28803                      |      |
| TC100002238.mm.1  | -1,56 Gm20610; Gm20625       | PSR1000015741.mm.1 | 2,18   | 0,042842 | 0,548097 Cassette Exon       | 0,09 |
| TC0300000228.mm.1 | -1 Usp13                     | JUC0300000705.mm.1 | 3,47   | 0,010664 | 0,423012                     |      |
| TC0200004896.mm.1 | 1,03 Trib3                   | JUC0200021501.mm.1 | 3,47   | 0,004091 | 0,36228                      |      |
| TC0200004896.mm.1 | 1,03 Trib3                   | JUC0200021500.mm.1 | 2,25   | 0,01385  | 0,445398                     |      |
| TC0300002295.mm.1 | 1,07 Bcan                    | JUC0300009125.mm.1 | 3,47   | 0,025271 | 0,497004                     |      |
| TC0900001885.mm.1 | -1,31 Dock6                  | JUC0900008937.mm.1 | 3,47   | 0,006441 | 0,390159                     |      |
| TC0900001885.mm.1 | -1,31 Dock6                  | JUC0900008969.mm.1 | 2,26   | 0,036551 | 0,531355                     |      |
| TC0700000023.mm.1 | 4,94 Ttyh1                   | JUC0700000139.mm.1 | 3,46   | 0,00033  | 0,28927                      |      |
| TC0700000023.mm.1 | 4,94 Ttyh1                   | JUC0700000137.mm.1 | 2,98   | 0,004635 | 0,370096                     |      |
| TC0700000023.mm.1 | 4,94 Ttyh1                   | PSR0700000307.mm.1 | 2,65   | 0,00275  | 0,35008 Cassette Exon        | 0,18 |
| TC0700000023.mm.1 | 4,94 Ttyh1                   | PSR0700000324.mm.1 | 2,1    | 0,001861 | 0,337823 Cassette Exon       | 0,34 |
| TC0700000023.mm.1 | 4,94 Ttyh1                   | JUC0700000140.mm.1 | 2,07   | 0,002653 | 0,349612                     |      |
| TC0700000023.mm.1 | 4,94 Ttyh1                   | JUC0700000144.mm.1 | -2,03  | 0,046231 | 0,556083                     |      |
| TC0700000023.mm.1 | 4,94 Ttyh1                   | PSR0700000292.mm.1 | -2,61  | 0,004151 | 0,3623 Alternative 3' Acce   | 0,35 |
| TC0700000023.mm.1 | 4,94 Ttyh1                   | PSR0700000332.mm.1 | -2,92  | 0,027035 | 0,502979 Alternative 5' Donc | 0,38 |
| TC0700000023.mm.1 | 4,94 Ttyh1                   | PSR0700000302.mm.1 | -3,05  | 0,001624 | 0,332831 Cassette Exon       | 0,23 |
| TC0700000023.mm.1 | 4,94 Ttyh1                   | PSR0700000309.mm.1 | -3,1   | 0,015543 | 0,454617 Alternative 5' Donc | 0,34 |
| TC0700000023.mm.1 | 4,94 Ttyh1                   | PSR0700000300.mm.1 | -3,15  | 0,007692 | 0,402552 Cassette Exon       | 0,3  |
| TC0700000023.mm.1 | 4,94 Ttyh1                   | JUC0700000130.mm.1 | -3,23  | 0,005545 | 0,380631                     |      |
| TC0700000023.mm.1 | 4,94 Ttyh1                   | PSR0700000306.mm.1 | -3,46  | 0,013098 | 0,439759 Alternative 3' Acce | 0,4  |
| TC0700000023.mm.1 | 4,94 Ttyh1                   | PSR0700000295.mm.1 | -4,13  | 0,028755 | 0,508148 Alternative 3' Acce | 0,34 |
| TC0700000023.mm.1 | 4,94 Ttyh1                   | PSR0700000322.mm.1 | -4,4   | 0,000614 | 0,304044 Intron Retention    | 0,75 |
| TC0700000023.mm.1 | 4,94 Ttyh1                   | PSR0700000291.mm.1 | -4,7   | 0,004262 | 0,363802 Alternative 3' Acce | 0,35 |
| TC0700000023.mm.1 | 4,94 Ttyh1                   | PSR0700000316.mm.1 | -4,74  | 0,009879 | 0,417993 Alternative 5' Donc | 0,38 |
| TC0700000023.mm.1 | 4,94 Ttyh1                   | JUC0700000138.mm.1 | -4,8   | 0,009532 | 0,416602                     |      |

|                   |                             |                    |       |          |          |                          |
|-------------------|-----------------------------|--------------------|-------|----------|----------|--------------------------|
| TC070000023.mm.1  | 4,94 Ttyh1                  | JUC0700000146.mm.1 | -5,31 | 0,003249 | 0,354243 |                          |
| TC070000023.mm.1  | 4,94 Ttyh1                  | PSR0700000313.mm.1 | -5,36 | 0,036101 | 0,529729 | Cassette Exon 0,32       |
| TC070000023.mm.1  | 4,94 Ttyh1                  | PSR0700000333.mm.1 | -5,5  | 0,009671 | 0,417554 | Alternative 5' Donc 0,38 |
| TC070000023.mm.1  | 4,94 Ttyh1                  | JUC0700000142.mm.1 | -6,13 | 0,002188 | 0,344463 |                          |
| TC070000023.mm.1  | 4,94 Ttyh1                  | PSR0700000320.mm.1 | -6,97 | 0,009716 | 0,417826 | Intron Retention 0,75    |
| TC070000023.mm.1  | 4,94 Ttyh1                  | JUC0700000145.mm.1 | -8,65 | 0,003167 | 0,353901 |                          |
| TC0100001114.mm.1 | 1,7 Mgat5                   | JUC0100005242.mm.1 | 3,46  | 0,003215 | 0,354243 |                          |
| TC0100001114.mm.1 | 1,7 Mgat5                   | JUC0100005237.mm.1 | 2,43  | 0,001708 | 0,335996 |                          |
| TC0100001114.mm.1 | 1,7 Mgat5                   | PSR0100009065.mm.1 | -2,02 | 0,018648 | 0,470078 | Alternative 5' Donc 0,16 |
| TC0100001114.mm.1 | 1,7 Mgat5                   | PSR0100009054.mm.1 | -3    | 0,018583 | 0,469618 | Alternative 5' Donc 0,32 |
| TC0400001538.mm.1 | 1,51 Bai2                   | PSR0400011986.mm.1 | 3,46  | 0,016977 | 0,461419 | Cassette Exon 0,26       |
| TC0400001538.mm.1 | 1,51 Bai2                   | JUC0400006236.mm.1 | 2,88  | 0,030066 | 0,511856 |                          |
| TC0400001538.mm.1 | 1,51 Bai2                   | JUC0400006234.mm.1 | 2,3   | 0,043642 | 0,550199 |                          |
| TC0400001538.mm.1 | 1,51 Bai2                   | PSR0400011966.mm.1 | 2,15  | 0,028012 | 0,505851 | Cassette Exon 0,1        |
| TC0400001538.mm.1 | 1,51 Bai2                   | PSR0400011996.mm.1 | 2,06  | 0,0297   | 0,510949 | Cassette Exon 0,18       |
| TC0400001538.mm.1 | 1,51 Bai2                   | PSR0400011988.mm.1 | -2,09 | 0,021216 | 0,481269 | Cassette Exon 0,1        |
| TC0400001538.mm.1 | 1,51 Bai2                   | PSR0400012005.mm.1 | -2,13 | 0,002997 | 0,353111 | Alternative 5' Donc 0,17 |
| TC0400001538.mm.1 | 1,51 Bai2                   | JUC0400006245.mm.1 | -2,39 | 0,033192 | 0,522148 |                          |
| TC1400001656.mm.1 | 1,22 Cacna1d                | PSR1400012450.mm.1 | 3,46  | 0,035726 | 0,529027 | Cassette Exon 0,25       |
| TC1400001656.mm.1 | 1,22 Cacna1d                | JUC1400006750.mm.1 | 3,13  | 0,001628 | 0,332831 |                          |
| TC1400001656.mm.1 | 1,22 Cacna1d                | JUC1400006753.mm.1 | 2,53  | 0,005591 | 0,381035 |                          |
| TC1400001656.mm.1 | 1,22 Cacna1d                | PSR1400012476.mm.1 | -2,45 | 0,00655  | 0,39213  | Cassette Exon 0,14       |
| TC0Y00000209.mm.1 | -1,41 Gm21095; Gm21627; Gm2 | JUC0Y00000819.mm.1 | 3,46  | 0,018787 | 0,470789 |                          |
| TC0Y00000209.mm.1 | -1,41 Gm21095; Gm21627; Gm2 | PSR0Y00001124.mm.1 | -2,38 | 0,026281 | 0,50053  | Cassette Exon 0,12       |
| TC0800000111.mm.1 | 1,53 Atp11a                 | JUC0800000533.mm.1 | 3,46  | 0,033939 | 0,524252 |                          |
| TC0800000111.mm.1 | 1,53 Atp11a                 | PSR0800000936.mm.1 | -2,02 | 0,024012 | 0,492783 | Alternative 5' Donc 0,11 |
| TC0300001446.mm.1 | -1,85 Gbp3                  | JUC0300006124.mm.1 | 3,46  | 0,006114 | 0,387268 |                          |
| TC0300001446.mm.1 | -1,85 Gbp3                  | JUC0300006130.mm.1 | 2,33  | 0,007649 | 0,402219 |                          |
| TC0300001446.mm.1 | -1,85 Gbp3                  | PSR0300011649.mm.1 | 2,26  | 0,015621 | 0,45509  | Cassette Exon 0,09       |
| TC1500000921.mm.1 | -1,07 Pphln1                | JUC1500004163.mm.1 | 3,46  | 0,003145 | 0,353892 |                          |
| TC1500000921.mm.1 | -1,07 Pphln1                | PSR1500007348.mm.1 | 2,01  | 0,000857 | 0,311909 | Cassette Exon 0,08       |
| TC0700004296.mm.1 | 1,39 Aldoa                  | PSR0700035952.mm.1 | 3,45  | 0,004867 | 0,371692 | Alternative 3' Acce 0,38 |
| TC0700004296.mm.1 | 1,39 Aldoa                  | PSR0700035974.mm.1 | -2,25 | 0,031585 | 0,517177 | Cassette Exon 0,16       |
| TC1900001509.mm.1 | 1,38 Slit1                  | PSR1900013246.mm.1 | 3,45  | 0,000813 | 0,311886 | Cassette Exon 0,23       |
| TC1900001509.mm.1 | 1,38 Slit1                  | PSR1900013247.mm.1 | 3,29  | 0,021648 | 0,483748 | Cassette Exon 0,29       |
| TC1900001509.mm.1 | 1,38 Slit1                  | JUC1900007303.mm.1 | 3,26  | 0,009221 | 0,41411  |                          |
| TC1900001509.mm.1 | 1,38 Slit1                  | JUC1900007318.mm.1 | 2,74  | 0,038119 | 0,535709 |                          |
| TC1900001509.mm.1 | 1,38 Slit1                  | JUC1900007308.mm.1 | 2,55  | 0,036545 | 0,531355 |                          |
| TC0X00001545.mm.1 | 1,75 3010001F23Rik          | PSR0X00009849.mm.1 | 3,45  | 0,00501  | 0,373851 | Cassette Exon 0,23       |
| TC0X00001545.mm.1 | 1,75 3010001F23Rik          | JUC0X00004965.mm.1 | -2,46 | 0,045271 | 0,553703 |                          |
| TC0100000201.mm.1 | 1,26 Khdrbs2                | JUC0100000620.mm.1 | 3,45  | 0,007859 | 0,40351  |                          |
| TC0100000201.mm.1 | 1,26 Khdrbs2                | JUC0100000623.mm.1 | 3,05  | 0,022293 | 0,486095 |                          |
| TC0100000201.mm.1 | 1,26 Khdrbs2                | PSR0100001192.mm.1 | 2,12  | 0,037599 | 0,534053 | Cassette Exon 0,22       |
| TC1500000353.mm.1 | -1,24 Pkhd1l1               | JUC1500001410.mm.1 | 3,45  | 0,022458 | 0,487003 |                          |
| TC1500001053.mm.1 | -1,35                       | JUC1500004703.mm.1 | 3,45  | 0,007873 | 0,403545 |                          |
| TC0900001385.mm.1 | 2,78 Camkv                  | JUC0900006014.mm.1 | 3,44  | 0,000115 | 0,267977 |                          |
| TC0900001385.mm.1 | 2,78 Camkv                  | JUC0900006016.mm.1 | 3,39  | 0,028017 | 0,505851 |                          |
| TC0900001385.mm.1 | 2,78 Camkv                  | PSR0900010935.mm.1 | 2,94  | 0,000236 | 0,28803  | Cassette Exon 0,28       |



|                   |              |                    |       |          |          |                     |      |
|-------------------|--------------|--------------------|-------|----------|----------|---------------------|------|
| TC0900001385.mm.1 | 2,78 Camkv   | PSR0900010930.mm.1 | 2,24  | 0,003051 | 0,353892 | Cassette Exon       | 0,15 |
| TC0900001385.mm.1 | 2,78 Camkv   | PSR0900010938.mm.1 | 2,07  | 0,000981 | 0,31497  | Cassette Exon       | 0,22 |
| TC0900001385.mm.1 | 2,78 Camkv   | PSR0900010939.mm.1 | -2,19 | 0,008448 | 0,406611 | Cassette Exon       | 0,1  |
| TC0900001385.mm.1 | 2,78 Camkv   | JUC0900006013.mm.1 | -2,55 | 0,036729 | 0,531779 |                     |      |
| TC0900001385.mm.1 | 2,78 Camkv   | PSR0900010929.mm.1 | -2,8  | 0,01357  | 0,443703 | Cassette Exon       | 0,17 |
| TC0900001385.mm.1 | 2,78 Camkv   | PSR0900010933.mm.1 | -3,24 | 0,014456 | 0,44909  | Intron Retention    | 0,54 |
| TC0600003316.mm.1 | 3,81 Gsg1    | JUC0600013564.mm.1 | 3,44  | 0,003297 | 0,354243 |                     |      |
| TC0600003316.mm.1 | 3,81 Gsg1    | JUC0600013565.mm.1 | 3,42  | 0,030665 | 0,513807 |                     |      |
| TC0600003316.mm.1 | 3,81 Gsg1    | PSR0600025997.mm.1 | 2,93  | 0,00386  | 0,358861 | Cassette Exon       | 0,25 |
| TC0600003316.mm.1 | 3,81 Gsg1    | PSR0600025996.mm.1 | 2,12  | 0,016791 | 0,460623 | Cassette Exon       | 0,32 |
| TC0600003316.mm.1 | 3,81 Gsg1    | JUC0600013569.mm.1 | -2,58 | 0,010626 | 0,422841 |                     |      |
| TC0600003316.mm.1 | 3,81 Gsg1    | PSR0600026002.mm.1 | -2,83 | 0,001395 | 0,325997 | Cassette Exon       | 0,02 |
| TC0600003316.mm.1 | 3,81 Gsg1    | PSR0600026001.mm.1 | -3,09 | 0,026827 | 0,502373 | Cassette Exon       | 0,04 |
| TC0600003316.mm.1 | 3,81 Gsg1    | PSR0600026004.mm.1 | -4,41 | 0,007784 | 0,402902 | Cassette Exon       | 0,28 |
| TC0600003316.mm.1 | 3,81 Gsg1    | PSR0600026005.mm.1 | -4,48 | 0,008906 | 0,410728 | Cassette Exon       | 0,28 |
| TC0600003316.mm.1 | 3,81 Gsg1    | JUC0600013571.mm.1 | -4,67 | 0,012748 | 0,436821 |                     |      |
| TC0600003316.mm.1 | 3,81 Gsg1    | PSR0600026003.mm.1 | -6,09 | 0,002785 | 0,35133  | Cassette Exon       | 0,41 |
| TC1100003665.mm.1 | 2,73 Stac2   | JUC1100017678.mm.1 | 3,44  | 0,006496 | 0,390944 |                     |      |
| TC1100003665.mm.1 | 2,73 Stac2   | PSR1100033737.mm.1 | 2,34  | 0,00541  | 0,379167 | Cassette Exon       | 0,05 |
| TC1100003665.mm.1 | 2,73 Stac2   | PSR1100033738.mm.1 | -2,36 | 0,031003 | 0,514829 | Cassette Exon       | 0,2  |
| TC1100003665.mm.1 | 2,73 Stac2   | JUC1100017674.mm.1 | -2,57 | 0,011302 | 0,427133 |                     |      |
| TC1100003665.mm.1 | 2,73 Stac2   | PSR1100033748.mm.1 | -2,58 | 0,033576 | 0,523185 | Alternative 5' Donc | 0,32 |
| TC1100003665.mm.1 | 2,73 Stac2   | JUC1100017671.mm.1 | -2,72 | 0,018363 | 0,468484 |                     |      |
| TC1100003665.mm.1 | 2,73 Stac2   | PSR1100033739.mm.1 | -2,74 | 0,015202 | 0,452738 | Cassette Exon       | 0,3  |
| TC1100003665.mm.1 | 2,73 Stac2   | JUC1100017676.mm.1 | -3,15 | 0,000083 | 0,252976 |                     |      |
| TC1100003665.mm.1 | 2,73 Stac2   | PSR1100033749.mm.1 | -3,37 | 0,019536 | 0,474538 | Alternative 5' Donc | 0,32 |
| TC1100003665.mm.1 | 2,73 Stac2   | JUC1100017680.mm.1 | -4,16 | 0,000712 | 0,306015 |                     |      |
| TC0200000492.mm.1 | -1,07 Ak8    | JUC0200001727.mm.1 | 3,44  | 0,00833  | 0,406336 |                     |      |
| TC0X00001005.mm.1 | -1,24 Gm9126 | JUC0X00003382.mm.1 | 3,44  | 0,019993 | 0,476227 |                     |      |
| TC0X00002417.mm.1 | -1,08 Xlr4a  | JUC0X00007584.mm.1 | 3,44  | 0,018273 | 0,468043 |                     |      |
| TC0200002835.mm.1 | 2 Myt1       | JUC0200011905.mm.1 | 3,43  | 0,002074 | 0,342181 |                     |      |
| TC0200002835.mm.1 | 2 Myt1       | JUC0200011897.mm.1 | 3,33  | 0,009302 | 0,414883 |                     |      |
| TC0200002835.mm.1 | 2 Myt1       | PSR0200023525.mm.1 | 3,06  | 0,001123 | 0,317328 | Alternative 5' Donc | 0,3  |
| TC0200002835.mm.1 | 2 Myt1       | JUC0200011917.mm.1 | 2,33  | 0,005813 | 0,383104 |                     |      |
| TC0200002835.mm.1 | 2 Myt1       | PSR0200023495.mm.1 | 2,26  | 0,009948 | 0,41841  | Alternative 3' Acce | 0,2  |
| TC0200002835.mm.1 | 2 Myt1       | JUC0200011906.mm.1 | 2,14  | 0,035786 | 0,529153 |                     |      |
| TC0200002835.mm.1 | 2 Myt1       | PSR0200023496.mm.1 | -2,01 | 0,006884 | 0,39438  | Cassette Exon       | 0,09 |
| TC0200002835.mm.1 | 2 Myt1       | PSR0200023519.mm.1 | -2,31 | 0,00265  | 0,349612 | Cassette Exon       | 0,17 |
| TC0200002835.mm.1 | 2 Myt1       | JUC0200011908.mm.1 | -2,32 | 0,004275 | 0,363868 |                     |      |
| TC0200002835.mm.1 | 2 Myt1       | JUC0200011911.mm.1 | -2,37 | 0,04607  | 0,555658 |                     |      |
| TC0200002835.mm.1 | 2 Myt1       | PSR0200023494.mm.1 | -2,39 | 0,000128 | 0,270905 | Cassette Exon       | 0,22 |
| TC0200002835.mm.1 | 2 Myt1       | PSR0200023484.mm.1 | -2,46 | 0,038212 | 0,535805 | Cassette Exon       | 0,14 |
| TC0200002835.mm.1 | 2 Myt1       | JUC0200011920.mm.1 | -2,54 | 0,028312 | 0,506741 |                     |      |
| TC0200002835.mm.1 | 2 Myt1       | PSR0200023490.mm.1 | -2,64 | 0,009564 | 0,416927 |                     |      |
| TC0200002835.mm.1 | 2 Myt1       | PSR0200023487.mm.1 | -3,03 | 0,011142 | 0,426226 | Alternative 3' Acce | 0,06 |
| TC0200002835.mm.1 | 2 Myt1       | JUC0200011899.mm.1 | -3,07 | 0,019435 | 0,473998 |                     |      |
| TC0200002835.mm.1 | 2 Myt1       | JUC0200011926.mm.1 | -3,13 | 0,003109 | 0,353892 |                     |      |
| TC0200002835.mm.1 | 2 Myt1       | PSR0200023518.mm.1 | -3,17 | 0,003667 | 0,357266 | Cassette Exon       | 0,24 |

|                   |                         |                    |       |          |          |                          |
|-------------------|-------------------------|--------------------|-------|----------|----------|--------------------------|
| TC0200002835.mm.1 | 2 Myt1                  | JUC0200011924.mm.1 | -3,31 | 0,033613 | 0,523309 |                          |
| TC0200002835.mm.1 | 2 Myt1                  | PSR0200023513.mm.1 | -3,65 | 0,007084 | 0,396891 | Alternative 5' Donc 0,52 |
| TC0200002835.mm.1 | 2 Myt1                  | JUC0200011909.mm.1 | -6,42 | 0,002126 | 0,342919 |                          |
| TC0200004108.mm.1 | 2,51 Madd               | JUC0200017542.mm.1 | 3,43  | 0,002922 | 0,352289 |                          |
| TC0200004108.mm.1 | 2,51 Madd               | PSR0200034324.mm.1 | 2,14  | 0,033066 | 0,521667 | Cassette Exon 0,1        |
| TC0200004108.mm.1 | 2,51 Madd               | PSR0200034359.mm.1 | -2,03 | 0,014928 | 0,451919 | Alternative 5' Donc 0,2  |
| TC0200004108.mm.1 | 2,51 Madd               | PSR0200034316.mm.1 | -2,05 | 0,007202 | 0,398011 | Alternative 5' Donc 0,12 |
| TC0200004108.mm.1 | 2,51 Madd               | PSR0200034394.mm.1 | -2,07 | 0,015922 | 0,456718 | Cassette Exon 0,14       |
| TC0200004108.mm.1 | 2,51 Madd               | JUC0200017573.mm.1 | -2,09 | 0,009849 | 0,417839 |                          |
| TC0200004108.mm.1 | 2,51 Madd               | PSR0200034386.mm.1 | -2,2  | 0,008361 | 0,406435 | Cassette Exon 0,14       |
| TC0200004108.mm.1 | 2,51 Madd               | JUC0200017533.mm.1 | -2,24 | 0,015612 | 0,455082 |                          |
| TC0200004108.mm.1 | 2,51 Madd               | PSR0200034384.mm.1 | -2,25 | 0,014499 | 0,449528 | Cassette Exon 0,14       |
| TC0200004108.mm.1 | 2,51 Madd               | JUC0200017551.mm.1 | -2,28 | 0,041163 | 0,544039 |                          |
| TC0200004108.mm.1 | 2,51 Madd               | PSR0200034377.mm.1 | -2,42 | 0,00934  | 0,415075 | Alternative 3' Acce 0,23 |
| TC0200004108.mm.1 | 2,51 Madd               | PSR0200034326.mm.1 | -2,59 | 0,024493 | 0,493992 | Alternative 3' Acce 0,28 |
| TC0200004108.mm.1 | 2,51 Madd               | JUC0200017561.mm.1 | -2,61 | 0,020835 | 0,479521 |                          |
| TC0200004108.mm.1 | 2,51 Madd               | PSR0200034322.mm.1 | -2,75 | 0,015512 | 0,454456 | Alternative 3' Acce 0,32 |
| TC0200004108.mm.1 | 2,51 Madd               | PSR0200034393.mm.1 | -2,79 | 0,01283  | 0,437626 | Cassette Exon 0,14       |
| TC0200004108.mm.1 | 2,51 Madd               | PSR0200034396.mm.1 | -2,99 | 0,041332 | 0,544314 | Alternative 5' Donc 0,15 |
| TC0200004108.mm.1 | 2,51 Madd               | PSR0200034338.mm.1 | -3,01 | 0,003588 | 0,356223 | Intron Retention 0,5     |
| TC0200004108.mm.1 | 2,51 Madd               | PSR0200034323.mm.1 | -3,06 | 0,010633 | 0,422841 | Alternative 3' Acce 0,34 |
| TC0200004108.mm.1 | 2,51 Madd               | JUC0200017550.mm.1 | -3,12 | 0,002263 | 0,34578  |                          |
| TC0200004108.mm.1 | 2,51 Madd               | JUC0200017562.mm.1 | -3,17 | 0,010515 | 0,422183 |                          |
| TC0200004108.mm.1 | 2,51 Madd               | JUC0200017546.mm.1 | -3,22 | 0,00268  | 0,349612 |                          |
| TC0200004108.mm.1 | 2,51 Madd               | JUC0200017539.mm.1 | -5,06 | 0,020306 | 0,477245 |                          |
| TC1300000482.mm.1 | 1,58 Phactr1            | JUC1300001504.mm.1 | 3,43  | 0,008349 | 0,406435 |                          |
| TC1300000482.mm.1 | 1,58 Phactr1            | PSR1300002917.mm.1 | -2,27 | 0,007707 | 0,402552 | Intron Retention 0,28    |
| TC1300000482.mm.1 | 1,58 Phactr1            | PSR1300002888.mm.1 | -2,52 | 0,042748 | 0,548097 | Cassette Exon 0,16       |
| TC1300000482.mm.1 | 1,58 Phactr1            | PSR1300002890.mm.1 | -2,77 | 0,002742 | 0,349612 | Alternative 3' Acce 0,29 |
| TC1300000482.mm.1 | 1,58 Phactr1            | JUC1300001513.mm.1 | -5,35 | 0,015374 | 0,453849 |                          |
| TC1000002586.mm.1 | -1,31 Appl2             | JUC1000010667.mm.1 | 3,43  | 0,00101  | 0,316361 |                          |
| TC1000002586.mm.1 | -1,31 Appl2             | PSR1000019535.mm.1 | -2,66 | 0,034943 | 0,52717  | Alternative 3' Acce 0,26 |
| TC0100001447.mm.1 | 1,04 Tnr                | JUC0100006801.mm.1 | 3,43  | 0,021912 | 0,484828 |                          |
| TC0100001447.mm.1 | 1,04 Tnr                | JUC0100006800.mm.1 | 2,68  | 0,006206 | 0,387873 |                          |
| TC0100001447.mm.1 | 1,04 Tnr                | JUC0100006807.mm.1 | 2,12  | 0,03382  | 0,523933 |                          |
| TC0200002277.mm.1 | 1,17 Csnk2a1            | JUC0200008952.mm.1 | 3,43  | 0,045925 | 0,555257 |                          |
| TC0800001566.mm.1 | -1,32 Ntpr              | JUC0800007013.mm.1 | 3,43  | 0,043692 | 0,550248 |                          |
| TC0700001942.mm.1 | 1,52 Zranb1             | JUC0700008989.mm.1 | 3,43  | 0,030385 | 0,512923 |                          |
| TC0700002045.mm.1 | 3,54 Drd4               | JUC0700009595.mm.1 | 3,43  | 0,023542 | 0,490947 |                          |
| TC1000000240.mm.1 | -1,19 Arhgap18          | JUC1000000904.mm.1 | 3,43  | 0,016295 | 0,458465 |                          |
| TC0200002077.mm.1 | 13,12 Snap25            | JUC0200008338.mm.1 | 3,42  | 0,00106  | 0,316361 |                          |
| TC0200002077.mm.1 | 13,12 Snap25            | PSR0200016535.mm.1 | 2,77  | 0,007268 | 0,398281 | Cassette Exon 0,17       |
| TC0200002077.mm.1 | 13,12 Snap25            | PSR0200016537.mm.1 | 2,03  | 0,023211 | 0,490032 | Cassette Exon 0,12       |
| TC0200002077.mm.1 | 13,12 Snap25            | PSR0200016538.mm.1 | -4,28 | 0,047922 | 0,559453 | Alternative 5' Donc 0,51 |
| TC0300002785.mm.1 | -1,16 Amy2a1            | PSR0300021920.mm.1 | 3,42  | 0,035642 | 0,528956 | Cassette Exon 0,22       |
| TC1100003128.mm.1 | -1,48 Nlrp1c-ps; Nlrp1c | JUC1100015187.mm.1 | 3,42  | 0,044534 | 0,551894 |                          |
| TC1100003128.mm.1 | -1,48 Nlrp1c-ps; Nlrp1c | PSR1100028999.mm.1 | 2,19  | 0,000533 | 0,304044 | Cassette Exon 0,22       |
| TC1100003932.mm.1 | -1,28 Pecam1            | JUC1100019272.mm.1 | 3,42  | 0,008423 | 0,406611 |                          |

|                   |                              |                    |       |          |                              |      |
|-------------------|------------------------------|--------------------|-------|----------|------------------------------|------|
| TC1100003932.mm.1 | -1,28 Pecam1                 | PSR1100036859.mm.1 | 2,3   | 0,020725 | 0,479166 Cassette Exon       | 0,14 |
| TC1100003932.mm.1 | -1,28 Pecam1                 | PSR1100036879.mm.1 | 2,14  | 0,005559 | 0,380773 Cassette Exon       | 0,12 |
| TC1100003932.mm.1 | -1,28 Pecam1                 | JUC1100019269.mm.1 | 2,05  | 0,035458 | 0,528724                     |      |
| TC1600000150.mm.1 | -1,42 Mkl2                   | JUC1600000562.mm.1 | 3,42  | 0,038774 | 0,537463                     |      |
| TC1600000150.mm.1 | -1,42 Mkl2                   | JUC1600000543.mm.1 | 2,29  | 0,002495 | 0,349135                     |      |
| TC0600000006.mm.1 | 5,46 Gngt1                   | JUC0600000041.mm.1 | 3,41  | 0,000279 | 0,28803                      |      |
| TC0600000006.mm.1 | 5,46 Gngt1                   | JUC0600000042.mm.1 | 3,3   | 0,002009 | 0,341091                     |      |
| TC0600000006.mm.1 | 5,46 Gngt1                   | PSR0600000074.mm.1 | -2,12 | 0,026824 | 0,502373 Alternative 5' Donc | 0,18 |
| TC0600000006.mm.1 | 5,46 Gngt1                   | PSR0600000068.mm.1 | -5,66 | 0,005673 | 0,382036 Alternative 3' Acce | 0,48 |
| TC0500002931.mm.1 | -1,83 4930428O21Rik          | PSR0500025899.mm.1 | 3,41  | 0,010071 | 0,418974 Alternative 5' Donc | 0,36 |
| TC0800001509.mm.1 | 1,22 Cpne7; Mir7080; mmu-mii | JUC0800006715.mm.1 | 3,41  | 0,004904 | 0,372548                     |      |
| TC0800001509.mm.1 | 1,22 Cpne7; Mir7080; mmu-mii | JUC0800006719.mm.1 | 3,09  | 0,026994 | 0,502864                     |      |
| TC0800001509.mm.1 | 1,22 Cpne7; Mir7080; mmu-mii | PSR0800012330.mm.1 | 2,09  | 0,024225 | 0,493294 Cassette Exon       | 0,1  |
| TC0800001509.mm.1 | 1,22 Cpne7; Mir7080; mmu-mii | PSR0800012329.mm.1 | -2,28 | 0,000473 | 0,298999 Intron Retention    | 0,32 |
| TC0800001509.mm.1 | 1,22 Cpne7; Mir7080; mmu-mii | JUC0800006716.mm.1 | -2,92 | 0,013271 | 0,441614                     |      |
| TC1100003538.mm.1 | -2,76 Tom11                  | PSR1100032314.mm.1 | 3,41  | 0,006138 | 0,387543 Cassette Exon       | 0,31 |
| TC1100003538.mm.1 | -2,76 Tom11                  | JUC1100016883.mm.1 | 3,2   | 0,009386 | 0,415457                     |      |
| TC1100003538.mm.1 | -2,76 Tom11                  | PSR1100032310.mm.1 | 3,02  | 0,019403 | 0,473802 Cassette Exon       | 0,22 |
| TC1100003538.mm.1 | -2,76 Tom11                  | JUC1100016895.mm.1 | 2,85  | 0,017963 | 0,466771                     |      |
| TC1100003538.mm.1 | -2,76 Tom11                  | PSR1100032308.mm.1 | 2,78  | 0,004488 | 0,367995 Cassette Exon       | 0,19 |
| TC1100003538.mm.1 | -2,76 Tom11                  | PSR1100032318.mm.1 | 2,72  | 0,009483 | 0,416578 Cassette Exon       | 0,16 |
| TC1100003538.mm.1 | -2,76 Tom11                  | JUC1100016892.mm.1 | 2,64  | 0,00058  | 0,304044                     |      |
| TC1100003538.mm.1 | -2,76 Tom11                  | PSR1100032303.mm.1 | 2,39  | 0,007269 | 0,398281 Alternative 5' Donc | 0,11 |
| TC1100003538.mm.1 | -2,76 Tom11                  | PSR1100032287.mm.1 | 2,27  | 0,022224 | 0,485896 Cassette Exon       | 0,13 |
| TC1100003538.mm.1 | -2,76 Tom11                  | JUC1100016898.mm.1 | 2,27  | 0,0243   | 0,49362                      |      |
| TC0700004444.mm.1 | 1,87 Fam196a                 | PSR0700037341.mm.1 | 3,41  | 0,004814 | 0,371408 Cassette Exon       | 0,22 |
| TC0700004444.mm.1 | 1,87 Fam196a                 | JUC0700019673.mm.1 | -3,85 | 0,011578 | 0,429122                     |      |
| TC1600000529.mm.1 | 1,31 Hcls1                   | PSR1600004994.mm.1 | 3,41  | 0,011003 | 0,425491 Cassette Exon       | 0,22 |
| TC1600000529.mm.1 | 1,31 Hcls1                   | JUC1600002637.mm.1 | -4,97 | 0,023008 | 0,48911                      |      |
| TC0400003832.mm.1 | -1,56 Pla2g5                 | PSR0400031604.mm.1 | 3,41  | 0,048137 | 0,559938 Cassette Exon       | 0,21 |
| TC0600003321.mm.1 | 1,51 Grin2b                  | JUC0600013580.mm.1 | 3,41  | 0,017611 | 0,464312                     |      |
| TC0600003321.mm.1 | 1,51 Grin2b                  | JUC0600013577.mm.1 | 3,01  | 0,039227 | 0,53882                      |      |
| TC0600003321.mm.1 | 1,51 Grin2b                  | PSR0600026047.mm.1 | 2,17  | 0,020942 | 0,479959 Cassette Exon       | 0,14 |
| TC0600003321.mm.1 | 1,51 Grin2b                  | PSR0600026050.mm.1 | -3,2  | 0,005448 | 0,379921 Cassette Exon       | 0,21 |
| TC0900003041.mm.1 | 2,23 Gnat1                   | JUC0900014265.mm.1 | 3,41  | 0,016912 | 0,460797                     |      |
| TC0900003041.mm.1 | 2,23 Gnat1                   | JUC0900014261.mm.1 | -2,38 | 0,00239  | 0,348564                     |      |
| TC0900003041.mm.1 | 2,23 Gnat1                   | PSR0900025426.mm.1 | -2,51 | 0,001128 | 0,317328 Cassette Exon       | 0,16 |
| TC1200002150.mm.1 | -1,47 Cep128                 | JUC1200008225.mm.1 | 3,41  | 0,018667 | 0,470205                     |      |
| TC1200002150.mm.1 | -1,47 Cep128                 | PSR1200014946.mm.1 | 2,56  | 0,018173 | 0,467441 Cassette Exon       | 0,13 |
| TC1200002150.mm.1 | -1,47 Cep128                 | PSR1200014912.mm.1 | 2,19  | 0,047526 | 0,558686 Cassette Exon       | 0,09 |
| TC1200002150.mm.1 | -1,47 Cep128                 | PSR1200014928.mm.1 | 2,07  | 0,016001 | 0,457051 Cassette Exon       | 0,1  |
| TC1200002150.mm.1 | -1,47 Cep128                 | JUC1200008205.mm.1 | 2,04  | 0,040416 | 0,541998                     |      |
| TC0400000080.mm.1 | -1,85 Gm11827                | JUC0400000241.mm.1 | 3,41  | 0,020952 | 0,479982                     |      |
| TC0400000080.mm.1 | -1,85 Gm11827                | JUC0400000239.mm.1 | 2,97  | 0,000149 | 0,272178                     |      |
| TC0400000080.mm.1 | -1,85 Gm11827                | PSR0400000500.mm.1 | 2,24  | 0,000628 | 0,304044 Cassette Exon       | 0,12 |
| TC0400000080.mm.1 | -1,85 Gm11827                | PSR0400000501.mm.1 | 2,17  | 0,00206  | 0,341885 Cassette Exon       | 0,12 |
| TC0800000550.mm.1 | 1,26 Rwd4a                   | JUC0800002102.mm.1 | 3,41  | 0,004818 | 0,371408                     |      |
| TC0900001458.mm.1 | 1,14 Elp6                    | JUC0900006757.mm.1 | 3,41  | 0,016272 | 0,45836                      |      |

|                   |                       |                    |       |          |                              |      |
|-------------------|-----------------------|--------------------|-------|----------|------------------------------|------|
| TC0700003001.mm.1 | -1,13 Trpm4           | JUC0700014483.mm.1 | 3,41  | 0,021443 | 0,482173                     |      |
| TC0400001090.mm.1 | -1,38 1700024P16Rik   | JUC0400003823.mm.1 | 3,41  | 0,010446 | 0,421652                     |      |
| TC1700000754.mm.1 | 2,03 Gabbr1           | JUC1700004140.mm.1 | 3,4   | 0,023297 | 0,49004                      |      |
| TC1700000754.mm.1 | 2,03 Gabbr1           | JUC1700004150.mm.1 | 3,22  | 0,011784 | 0,430144                     |      |
| TC1700000754.mm.1 | 2,03 Gabbr1           | JUC1700004137.mm.1 | 2,29  | 0,007708 | 0,402552                     |      |
| TC1700000754.mm.1 | 2,03 Gabbr1           | JUC1700004143.mm.1 | 2,18  | 0,028455 | 0,507299                     |      |
| TC1700000754.mm.1 | 2,03 Gabbr1           | PSR1700007622.mm.1 | -2,11 | 0,035756 | 0,529087                     |      |
| TC1700000754.mm.1 | 2,03 Gabbr1           | PSR1700007645.mm.1 | -2,21 | 0,041724 | 0,545379 Alternative 3' Acce | 0,2  |
| TC1700000754.mm.1 | 2,03 Gabbr1           | PSR1700007620.mm.1 | -2,35 | 0,048461 | 0,560828 Cassette Exon       | 0,21 |
| TC1700000754.mm.1 | 2,03 Gabbr1           | PSR1700007632.mm.1 | -2,5  | 0,031592 | 0,517221 Alternative 3' Acce | 0,38 |
| TC1700000754.mm.1 | 2,03 Gabbr1           | PSR1700007623.mm.1 | -2,65 | 0,026466 | 0,501252 Cassette Exon       | 0,18 |
| TC1700000754.mm.1 | 2,03 Gabbr1           | PSR1700007619.mm.1 | -2,65 | 0,015661 | 0,45537 Cassette Exon        | 0,14 |
| TC1700000754.mm.1 | 2,03 Gabbr1           | PSR1700007633.mm.1 | -2,9  | 0,019838 | 0,475536 Alternative 3' Acce | 0,41 |
| TC1700000754.mm.1 | 2,03 Gabbr1           | JUC1700004136.mm.1 | -2,97 | 0,008287 | 0,406032                     |      |
| TC1700000754.mm.1 | 2,03 Gabbr1           | PSR1700007654.mm.1 | -3,25 | 0,017046 | 0,461805 Alternative 3' Acce | 0,35 |
| TC1700000754.mm.1 | 2,03 Gabbr1           | PSR1700007624.mm.1 | -3,96 | 0,022458 | 0,487003 Alternative 5' Donc | 0,27 |
| TC1700000754.mm.1 | 2,03 Gabbr1           | PSR1700007628.mm.1 | -4,06 | 0,012378 | 0,434939 Alternative 5' Donc | 0,48 |
| TC1700000754.mm.1 | 2,03 Gabbr1           | JUC1700004139.mm.1 | -4,88 | 0,021094 | 0,480377                     |      |
| TC0X00003339.mm.1 | 2,76 Gira2            | PSR0X00020818.mm.1 | 3,4   | 0,002513 | 0,349347 Cassette Exon       | 0,31 |
| TC0X00003339.mm.1 | 2,76 Gira2            | JUC0X00010503.mm.1 | 2,34  | 0,038403 | 0,536405                     |      |
| TC0X00003339.mm.1 | 2,76 Gira2            | PSR0X00020824.mm.1 | -2,02 | 0,039527 | 0,539764 Alternative 5' Donc | 0,15 |
| TC0X00003339.mm.1 | 2,76 Gira2            | PSR0X00020816.mm.1 | -2,19 | 0,001299 | 0,322929 Cassette Exon       | 0,07 |
| TC0400001514.mm.1 | -1,24 Fndc5           | JUC0400006088.mm.1 | 3,4   | 0,006864 | 0,394116                     |      |
| TC0400001514.mm.1 | -1,24 Fndc5           | PSR0400011660.mm.1 | 2,72  | 0,000624 | 0,304044 Cassette Exon       | 0,27 |
| TC0400001514.mm.1 | -1,24 Fndc5           | JUC0400006085.mm.1 | 2,52  | 0,03043  | 0,513134                     |      |
| TC0400001514.mm.1 | -1,24 Fndc5           | PSR0400011658.mm.1 | 2,29  | 0,047875 | 0,559408 Cassette Exon       | 0,16 |
| TC0200003192.mm.1 | -1,11 Notch1          | JUC0200013543.mm.1 | 3,4   | 0,00965  | 0,417359                     |      |
| TC0200003192.mm.1 | -1,11 Notch1          | JUC0200013523.mm.1 | 2,16  | 0,001463 | 0,328846                     |      |
| TC1200002101.mm.1 | -1,64 0610007P14Rik   | JUC1200008029.mm.1 | 3,4   | 0,008446 | 0,406611                     |      |
| TC0200004983.mm.1 | -1,11 Rbm39           | JUC0200021986.mm.1 | 3,4   | 0,049678 | 0,563531                     |      |
| TC1200002406.mm.1 | 4,02 Gm266            | PSR1200016702.mm.1 | 3,39  | 0,020302 | 0,477245 Alternative 3' Acce | 0,38 |
| TC1200002406.mm.1 | 4,02 Gm266            | PSR1200016704.mm.1 | -3,39 | 0,020302 | 0,477245 Cassette Exon       | 0,22 |
| TC0900001297.mm.1 | -1,73 Slco2a1         | JUC0900005541.mm.1 | 3,39  | 0,011852 | 0,430752                     |      |
| TC0900001297.mm.1 | -1,73 Slco2a1         | PSR0900010077.mm.1 | 2,26  | 0,03462  | 0,52602 Cassette Exon        | 0,12 |
| TC0900001297.mm.1 | -1,73 Slco2a1         | PSR0900010103.mm.1 | 2,02  | 0,001921 | 0,34017 Cassette Exon        | 0,1  |
| TC1800001054.mm.1 | 1,17 Garem            | JUC1800004345.mm.1 | 3,39  | 0,044579 | 0,551978                     |      |
| TC0700000018.mm.1 | -1,35 Tsen34          | JUC0700000114.mm.1 | 3,39  | 0,048868 | 0,561704                     |      |
| TC0500002979.mm.1 | 1,25 Zfp932; Gm17655  | JUC0500014364.mm.1 | 3,39  | 0,024227 | 0,493294                     |      |
| TC0500002979.mm.1 | 1,25 Zfp932; Gm17655  | JUC0500014362.mm.1 | -2,51 | 0,033256 | 0,52224                      |      |
| TC0X00001343.mm.1 | 2,09 Zcchc18; Gm15038 | PSR0X00008471.mm.1 | 3,38  | 0,000357 | 0,290838 Alternative 5' Donc | 0,34 |
| TC0X00001343.mm.1 | 2,09 Zcchc18; Gm15038 | PSR0X00008476.mm.1 | -2,04 | 0,046379 | 0,556334 Alternative 5' Donc | 0,17 |
| TC0X00001343.mm.1 | 2,09 Zcchc18; Gm15038 | PSR0X00008466.mm.1 | -2,93 | 0,041283 | 0,544166 Alternative 3' Acce | 0,18 |
| TC1700002422.mm.1 | -1,36 Ndufv2          | PSR1700022485.mm.1 | 3,38  | 0,002433 | 0,349135 Cassette Exon       | 0,28 |
| TC0200002078.mm.1 | -1,15 Slx4ip          | JUC0200008342.mm.1 | 3,38  | 0,024566 | 0,494179                     |      |
| TC0200002078.mm.1 | -1,15 Slx4ip          | JUC0200008350.mm.1 | 2,04  | 0,013252 | 0,441416                     |      |
| TC1000003132.mm.1 | -1,32 Spryd4          | JUC1000012946.mm.1 | 3,38  | 0,030221 | 0,512452                     |      |
| TC0400004050.mm.1 | 1,65 Slc25a33         | JUC0400017582.mm.1 | 3,38  | 0,008735 | 0,409597                     |      |
| TC0900002698.mm.1 | -1,88 Mlip            | JUC0900012490.mm.1 | 3,38  | 0,022942 | 0,488667                     |      |

|                   |                    |                    |       |          |          |                          |
|-------------------|--------------------|--------------------|-------|----------|----------|--------------------------|
| TC0900002698.mm.1 | -1,88 Mlip         | JUC0900012487.mm.1 | 2,18  | 0,034363 | 0,525595 |                          |
| TC1200000792.mm.1 | -1,34 Psen1        | PSR1200005610.mm.1 | 3,37  | 0,018681 | 0,470289 | Alternative 3' Acce 0,35 |
| TC0600001802.mm.1 | -1,01 Sgce         | PSR0600014235.mm.1 | 3,37  | 0,023135 | 0,489756 | Cassette Exon 0,34       |
| TC0400003337.mm.1 | 1,89 Mast2         | PSR0400026655.mm.1 | 3,37  | 0,010452 | 0,421652 | Alternative 3' Acce 0,33 |
| TC0400003337.mm.1 | 1,89 Mast2         | PSR0400026667.mm.1 | 3,19  | 0,004477 | 0,367858 | Cassette Exon 0,29       |
| TC0400003337.mm.1 | 1,89 Mast2         | PSR0400026638.mm.1 | -2,16 | 0,0103   | 0,420394 | Alternative 5' Donc 0,18 |
| TC1400002366.mm.1 | 1,07 LOC675947     | JUC1400010201.mm.1 | 3,37  | 0,018324 | 0,468127 |                          |
| TC1400002366.mm.1 | 1,07 LOC675947     | JUC1400010203.mm.1 | 3,18  | 0,009941 | 0,41841  |                          |
| TC1400002366.mm.1 | 1,07 LOC675947     | JUC1400010195.mm.1 | 2,95  | 0,023204 | 0,490032 |                          |
| TC1400002366.mm.1 | 1,07 LOC675947     | PSR1400018492.mm.1 | 2,19  | 0,026713 | 0,502096 | Cassette Exon 0,17       |
| TC1400002366.mm.1 | 1,07 LOC675947     | PSR1400018498.mm.1 | 2,05  | 0,011195 | 0,426491 | Cassette Exon 0,2        |
| TC1400002366.mm.1 | 1,07 LOC675947     | JUC1400010219.mm.1 | -2,15 | 0,046234 | 0,556097 |                          |
| TC1400002366.mm.1 | 1,07 LOC675947     | JUC1400010198.mm.1 | -2,2  | 0,003215 | 0,354243 |                          |
| TC1800000641.mm.1 | 1,09 Htr4          | JUC1800002625.mm.1 | 3,37  | 0,007173 | 0,397855 |                          |
| TC0100001202.mm.1 | 1,02 Ppp1r15b      | JUC0100005665.mm.1 | 3,37  | 0,0316   | 0,517317 |                          |
| TC1500002238.mm.1 | -1,01 Slc11a2      | JUC1500010441.mm.1 | 3,37  | 0,025011 | 0,496061 |                          |
| TC0800001463.mm.1 | 1,07 1700030M09Rik | JUC0800006521.mm.1 | 3,37  | 0,015152 | 0,452699 |                          |
| TC0700000169.mm.1 | -1,44 Sult2a2      | JUC0700000650.mm.1 | 3,37  | 0,035252 | 0,52837  |                          |
| TC0600000182.mm.1 | -1,16 Cped1        | JUC0600000577.mm.1 | 3,37  | 0,037434 | 0,533831 |                          |
| TC0600000182.mm.1 | -1,16 Cped1        | JUC0600000564.mm.1 | 3,21  | 0,042356 | 0,547419 |                          |
| TC0X00000388.mm.1 | 1,4 Gria3; Gm22413 | JUC0X00001295.mm.1 | 3,37  | 0,011436 | 0,427663 |                          |
| TC0X00000388.mm.1 | 1,4 Gria3; Gm22413 | JUC0X00001296.mm.1 | -2,17 | 0,019233 | 0,472971 |                          |
| TC0800000112.mm.1 | 1,85 Mcf2l         | JUC0800000549.mm.1 | 3,36  | 0,002125 | 0,342919 |                          |
| TC0800000112.mm.1 | 1,85 Mcf2l         | JUC0800000558.mm.1 | 2,15  | 0,022462 | 0,487037 |                          |
| TC0800000112.mm.1 | 1,85 Mcf2l         | JUC0800000542.mm.1 | 2,15  | 0,02735  | 0,503766 |                          |
| TC0800000112.mm.1 | 1,85 Mcf2l         | PSR0800001006.mm.1 | 2,14  | 0,001004 | 0,316361 | Cassette Exon 0,15       |
| TC0800000112.mm.1 | 1,85 Mcf2l         | PSR0800001031.mm.1 | -2,01 | 0,034223 | 0,525151 |                          |
| TC0800000112.mm.1 | 1,85 Mcf2l         | JUC0800000551.mm.1 | -2,03 | 0,046176 | 0,555838 |                          |
| TC0800000112.mm.1 | 1,85 Mcf2l         | PSR0800000967.mm.1 | -2,04 | 0,039375 | 0,539409 | Alternative 3' Acce 0,11 |
| TC0800000112.mm.1 | 1,85 Mcf2l         | JUC0800000566.mm.1 | -2,07 | 0,019191 | 0,472846 |                          |
| TC0800000112.mm.1 | 1,85 Mcf2l         | PSR0800000960.mm.1 | -2,09 | 0,022933 | 0,488642 |                          |
| TC0800000112.mm.1 | 1,85 Mcf2l         | JUC0800000536.mm.1 | -2,1  | 0,005234 | 0,377425 |                          |
| TC0800000112.mm.1 | 1,85 Mcf2l         | PSR0800001027.mm.1 | -2,11 | 0,036866 | 0,532257 | Intron Retention 0,08    |
| TC0800000112.mm.1 | 1,85 Mcf2l         | JUC0800000563.mm.1 | -2,11 | 0,00752  | 0,401141 |                          |
| TC0800000112.mm.1 | 1,85 Mcf2l         | JUC0800000572.mm.1 | -2,11 | 0,02713  | 0,503041 |                          |
| TC0800000112.mm.1 | 1,85 Mcf2l         | PSR0800000974.mm.1 | -2,13 | 0,031139 | 0,515568 | Alternative 3' Acce 0,08 |
| TC0800000112.mm.1 | 1,85 Mcf2l         | PSR0800000963.mm.1 | -2,16 | 0,005665 | 0,381922 | Alternative 3' Acce 0,16 |
| TC0800000112.mm.1 | 1,85 Mcf2l         | PSR0800000982.mm.1 | -2,26 | 0,019063 | 0,471993 | Alternative 5' Donc 0,09 |
| TC0800000112.mm.1 | 1,85 Mcf2l         | JUC0800000540.mm.1 | -2,34 | 0,030971 | 0,514659 |                          |
| TC0800000112.mm.1 | 1,85 Mcf2l         | PSR0800000955.mm.1 | -2,38 | 0,00269  | 0,349612 | Cassette Exon 0,13       |
| TC0800000112.mm.1 | 1,85 Mcf2l         | JUC0800000547.mm.1 | -2,75 | 0,013811 | 0,445064 |                          |
| TC0800000112.mm.1 | 1,85 Mcf2l         | JUC0800000539.mm.1 | -2,75 | 0,03356  | 0,523131 |                          |
| TC0800000112.mm.1 | 1,85 Mcf2l         | PSR0800000970.mm.1 | -2,8  | 0,008748 | 0,409704 | Alternative 3' Acce 0,13 |
| TC0800000112.mm.1 | 1,85 Mcf2l         | PSR0800000957.mm.1 | -2,82 | 0,0315   | 0,516965 | Cassette Exon 0,27       |
| TC0800000112.mm.1 | 1,85 Mcf2l         | JUC0800000543.mm.1 | -3,31 | 0,016888 | 0,460797 |                          |
| TC0800000112.mm.1 | 1,85 Mcf2l         | JUC0800000573.mm.1 | -3,31 | 0,028526 | 0,507436 |                          |
| TC0800000112.mm.1 | 1,85 Mcf2l         | JUC0800000538.mm.1 | -5,22 | 0,002332 | 0,347203 |                          |
| TC0100000044.mm.1 | -1,4 Sgk3          | PSR0100000348.mm.1 | 3,36  | 0,008298 | 0,406122 | Cassette Exon 0,22       |

|                   |                     |                    |        |          |                              |      |
|-------------------|---------------------|--------------------|--------|----------|------------------------------|------|
| TC0600003176.mm.1 | 1,92 Prmt8          | PSR0600024799.mm.1 | 3,36   | 0,000089 | 0,255472 Cassette Exon       | 0,2  |
| TC0600003176.mm.1 | 1,92 Prmt8          | PSR0600024795.mm.1 | 2,1    | 0,009331 | 0,414973 Cassette Exon       | 0,09 |
| TC1000002903.mm.1 | 1,7 Lgr5            | JUC1000012045.mm.1 | 3,36   | 0,048778 | 0,561474                     |      |
| TC1000002903.mm.1 | 1,7 Lgr5            | JUC1000012052.mm.1 | 3,28   | 0,01058  | 0,422493                     |      |
| TC1000002903.mm.1 | 1,7 Lgr5            | JUC1000012053.mm.1 | 2,21   | 0,016894 | 0,460797                     |      |
| TC1000002903.mm.1 | 1,7 Lgr5            | PSR1000021922.mm.1 | -2,29  | 0,016102 | 0,457676 Intron Retention    | 0,15 |
| TC1000002903.mm.1 | 1,7 Lgr5            | PSR1000021929.mm.1 | -2,52  | 0,000816 | 0,311886 Alternative 3' Acce | 0,13 |
| TC1200000149.mm.1 | 1 Gm9222            | JUC1200000744.mm.1 | 3,36   | 0,006905 | 0,394866                     |      |
| TC1200000149.mm.1 | 1 Gm9222            | JUC1200000748.mm.1 | 2,62   | 0,001655 | 0,334378                     |      |
| TC1200000149.mm.1 | 1 Gm9222            | JUC1200000743.mm.1 | 2,12   | 0,037906 | 0,535116                     |      |
| TC1200000149.mm.1 | 1 Gm9222            | JUC1200000751.mm.1 | -2,5   | 0,047765 | 0,559125                     |      |
| TC1000000752.mm.1 | 1,01 Slc19a1        | JUC1000002978.mm.1 | 3,36   | 0,041429 | 0,544646                     |      |
| TC1200000247.mm.1 | 1,58 Myt1l          | PSR1200001881.mm.1 | 3,35   | 0,001198 | 0,321568 Cassette Exon       | 0,22 |
| TC1200000247.mm.1 | 1,58 Myt1l          | JUC1200001075.mm.1 | 2,7    | 0,004077 | 0,36209                      |      |
| TC1200000247.mm.1 | 1,58 Myt1l          | PSR1200001874.mm.1 | 2,47   | 0,002595 | 0,349501 Cassette Exon       | 0,18 |
| TC1200000247.mm.1 | 1,58 Myt1l          | JUC1200001068.mm.1 | 2,36   | 0,033872 | 0,524121                     |      |
| TC1200000247.mm.1 | 1,58 Myt1l          | PSR1200001893.mm.1 | 2,16   | 0,009159 | 0,413447 Cassette Exon       | 0,15 |
| TC1200000247.mm.1 | 1,58 Myt1l          | PSR1200001905.mm.1 | 2,07   | 0,016839 | 0,460729 Cassette Exon       | 0,14 |
| TC1200000247.mm.1 | 1,58 Myt1l          | PSR1200001870.mm.1 | -2,04  | 0,035757 | 0,529087 Alternative 5' Donc | 0,08 |
| TC1200000247.mm.1 | 1,58 Myt1l          | PSR1200001911.mm.1 | -2,05  | 0,038218 | 0,535805                     |      |
| TC1200000247.mm.1 | 1,58 Myt1l          | PSR1200001871.mm.1 | -2,52  | 0,040761 | 0,543092 Alternative 5' Donc | 0,08 |
| TC1200000247.mm.1 | 1,58 Myt1l          | PSR1200001882.mm.1 | -2,58  | 0,012317 | 0,434392 Alternative 5' Donc | 0,39 |
| TC1200000247.mm.1 | 1,58 Myt1l          | PSR1200001894.mm.1 | -2,6   | 0,036948 | 0,532361 Cassette Exon       | 0,22 |
| TC1200000247.mm.1 | 1,58 Myt1l          | PSR1200001883.mm.1 | -3,22  | 0,004314 | 0,364152 Alternative 3' Acce | 0,49 |
| TC1200000247.mm.1 | 1,58 Myt1l          | JUC1200001085.mm.1 | -3,43  | 0,006755 | 0,393343                     |      |
| TC1200000247.mm.1 | 1,58 Myt1l          | JUC1200001095.mm.1 | -4,08  | 0,017109 | 0,46232                      |      |
| TC0900000096.mm.1 | -1,06 Fam76b        | PSR0900000681.mm.1 | 3,35   | 0,01765  | 0,464582 Alternative 5' Donc | 0,39 |
| TC0800000127.mm.1 | 11,67 Grk1          | JUC0800000673.mm.1 | 3,35   | 0,007106 | 0,396897                     |      |
| TC0800000127.mm.1 | 11,67 Grk1          | PSR0800001188.mm.1 | -2,23  | 0,013822 | 0,445154 Cassette Exon       | 0,25 |
| TC0800000127.mm.1 | 11,67 Grk1          | JUC0800000677.mm.1 | -2,84  | 0,006382 | 0,389554                     |      |
| TC0800000127.mm.1 | 11,67 Grk1          | JUC0800000676.mm.1 | -10,45 | 0,002051 | 0,341397                     |      |
| TC1700000085.mm.1 | -1,8 Mpc1           | JUC1700000379.mm.1 | 3,35   | 0,023246 | 0,490032                     |      |
| TC1700000085.mm.1 | -1,8 Mpc1           | PSR1700000670.mm.1 | 2,97   | 0,048486 | 0,560864 Cassette Exon       | 0,1  |
| TC1700000085.mm.1 | -1,8 Mpc1           | PSR1700000675.mm.1 | 2,86   | 0,030464 | 0,513244 Cassette Exon       | 0,09 |
| TC1700000085.mm.1 | -1,8 Mpc1           | JUC1700000377.mm.1 | 2,18   | 0,048431 | 0,560744                     |      |
| TC0200001786.mm.1 | -1,03 Mapkbp1       | JUC0200006753.mm.1 | 3,35   | 0,009568 | 0,416927                     |      |
| TC0200001786.mm.1 | -1,03 Mapkbp1       | JUC0200006747.mm.1 | 2,66   | 0,020813 | 0,479514                     |      |
| TC0700004363.mm.1 | -2,13 Rgs10         | JUC0700019318.mm.1 | 3,35   | 0,003393 | 0,354856                     |      |
| TC0700004122.mm.1 | -1,36 2310014F06Rik | JUC0700017949.mm.1 | 3,35   | 0,04886  | 0,561704                     |      |
| TC0400001137.mm.1 | -1,17 0610037L13Rik | JUC0400004137.mm.1 | 3,35   | 0,038934 | 0,537874                     |      |
| TC0400003957.mm.1 | -1,26 Tnfrsf1b      | JUC0400017108.mm.1 | 3,35   | 0,038431 | 0,536405                     |      |
| TC0900002427.mm.1 | 11,4 Nr2e3; Gm15507 | PSR0900020342.mm.1 | 3,34   | 0,000012 | 0,179072                     |      |
| TC0900002427.mm.1 | 11,4 Nr2e3; Gm15507 | JUC0900011470.mm.1 | 3,31   | 0,000003 | 0,179072                     |      |
| TC0900002427.mm.1 | 11,4 Nr2e3; Gm15507 | JUC0900011467.mm.1 | 2,51   | 0,000314 | 0,288663                     |      |
| TC0900002427.mm.1 | 11,4 Nr2e3; Gm15507 | JUC0900011465.mm.1 | -2,22  | 0,016764 | 0,460504                     |      |
| TC0900002427.mm.1 | 11,4 Nr2e3; Gm15507 | PSR0900020332.mm.1 | -3,25  | 0,043571 | 0,550033 Alternative 3' Acce | 0,28 |
| TC0900002427.mm.1 | 11,4 Nr2e3; Gm15507 | PSR0900020341.mm.1 | -4,51  | 0,001133 | 0,317344                     |      |
| TC0900002427.mm.1 | 11,4 Nr2e3; Gm15507 | JUC0900011471.mm.1 | -6,84  | 0,000135 | 0,270905                     |      |

|                   |                     |                    |        |          |                              |      |
|-------------------|---------------------|--------------------|--------|----------|------------------------------|------|
| TC0900002427.mm.1 | 11,4 Nr2e3; Gm15507 | PSR0900020334.mm.1 | -8,1   | 0,012976 | 0,439245 Intron Retention    | 0,73 |
| TC0900002427.mm.1 | 11,4 Nr2e3; Gm15507 | JUC0900011472.mm.1 | -8,13  | 0,001525 | 0,330287                     |      |
| TC0900002427.mm.1 | 11,4 Nr2e3; Gm15507 | PSR0900020328.mm.1 | -8,18  | 0,008893 | 0,410717 Alternative 3' Acce | 0,45 |
| TC0900002427.mm.1 | 11,4 Nr2e3; Gm15507 | JUC0900011473.mm.1 | -8,31  | 0,000371 | 0,291725                     |      |
| TC0900002427.mm.1 | 11,4 Nr2e3; Gm15507 | PSR0900020349.mm.1 | -8,7   | 0,005442 | 0,379743 Intron Retention    | 0,67 |
| TC0900002427.mm.1 | 11,4 Nr2e3; Gm15507 | PSR0900020363.mm.1 | -10,37 | 0,002385 | 0,348564 Cassette Exon       | 0,21 |
| TC0900002427.mm.1 | 11,4 Nr2e3; Gm15507 | PSR0900020346.mm.1 | -11    | 0,006102 | 0,387166 Intron Retention    | 0,68 |
| TC0900002427.mm.1 | 11,4 Nr2e3; Gm15507 | PSR0900020344.mm.1 | -11,33 | 0,000438 | 0,297771 Intron Retention    | 0,75 |
| TC0900002427.mm.1 | 11,4 Nr2e3; Gm15507 | PSR0900020356.mm.1 | -12,37 | 0,002686 | 0,349612 Cassette Exon       | 0,21 |
| TC0900002427.mm.1 | 11,4 Nr2e3; Gm15507 | PSR0900020348.mm.1 | -14,24 | 0,001251 | 0,322251 Intron Retention    | 0,67 |
| TC0900002427.mm.1 | 11,4 Nr2e3; Gm15507 | PSR0900020353.mm.1 | -14,46 | 0,00225  | 0,34578 Alternative 5' Donc  | 0,44 |
| TC0900002427.mm.1 | 11,4 Nr2e3; Gm15507 | JUC0900011477.mm.1 | -19,76 | 0,030913 | 0,514584                     |      |
| TC0900002427.mm.1 | 11,4 Nr2e3; Gm15507 | PSR0900020355.mm.1 | -21,62 | 0,000217 | 0,28803 Cassette Exon        | 0,21 |
| TC0900002427.mm.1 | 11,4 Nr2e3; Gm15507 | PSR0900020360.mm.1 | -24,08 | 0,000618 | 0,304044 Cassette Exon       | 0,55 |
| TC0900002427.mm.1 | 11,4 Nr2e3; Gm15507 | JUC0900011476.mm.1 | -24,09 | 0,001693 | 0,335395                     |      |
| TC0900002427.mm.1 | 11,4 Nr2e3; Gm15507 | PSR0900020364.mm.1 | -24,5  | 0,000539 | 0,304044 Cassette Exon       | 0,41 |
| TC0900002427.mm.1 | 11,4 Nr2e3; Gm15507 | JUC0900011475.mm.1 | -36,87 | 0,000643 | 0,304044                     |      |
| TC0900002427.mm.1 | 11,4 Nr2e3; Gm15507 | PSR0900020338.mm.1 | -38,34 | 0,0003   | 0,288663 Intron Retention    | 0,75 |
| TC0900002427.mm.1 | 11,4 Nr2e3; Gm15507 | JUC0900011478.mm.1 | -54,12 | 0,000491 | 0,298999                     |      |
| TC0900002427.mm.1 | 11,4 Nr2e3; Gm15507 | PSR0900020365.mm.1 | -61,46 | 0,000666 | 0,304088 Cassette Exon       | 0,28 |
| TC1100003387.mm.1 | -3,07               | JUC1100016224.mm.1 | 3,34   | 0,025578 | 0,497808                     |      |
| TC1100003387.mm.1 | -3,07               | PSR1100031034.mm.1 | 3,19   | 0,048335 | 0,560493 Cassette Exon       | 0,31 |
| TC1300002436.mm.1 | -1,1 Bhmt           | JUC1300008596.mm.1 | 3,34   | 0,000103 | 0,262646                     |      |
| TC0100002554.mm.1 | -1,08 Pecr          | JUC0100011656.mm.1 | 3,34   | 0,034316 | 0,525546                     |      |
| TC1600001112.mm.1 | -1,12 Slx4          | JUC1600004595.mm.1 | 3,34   | 0,019872 | 0,475704                     |      |
| TC0600001522.mm.1 | -1,49 Clec2g        | JUC0600006530.mm.1 | 3,34   | 0,016176 | 0,457969                     |      |
| TC1100001066.mm.1 | 1,01 Smyd4          | JUC1100005047.mm.1 | 3,34   | 0,002496 | 0,349135                     |      |
| TC0X00003376.mm.1 | 1,15 Hccs           | JUC0X00010655.mm.1 | 3,34   | 0,00616  | 0,387873                     |      |
| TC1500000049.mm.1 | 3,22                | PSR1500000434.mm.1 | 3,33   | 0,025499 | 0,497664 Cassette Exon       | 0,23 |
| TC1500000049.mm.1 | 3,22                | JUC1500000265.mm.1 | -3,46  | 0,019136 | 0,472431                     |      |
| TC1700000946.mm.1 | 2,58 Lfn2           | PSR1700009122.mm.1 | 3,33   | 0,042403 | 0,547627 Cassette Exon       | 0,2  |
| TC0700004579.mm.1 | -1,07 Trpm5         | JUC0700020367.mm.1 | 3,33   | 0,013635 | 0,444143                     |      |
| TC0700004579.mm.1 | -1,07 Trpm5         | JUC0700020349.mm.1 | 2,09   | 0,022216 | 0,485896                     |      |
| TC0900000221.mm.1 | 1,31 9530077C05Rik  | JUC0900000887.mm.1 | 3,33   | 0,001191 | 0,321162                     |      |
| TC0400001893.mm.1 | -2,04               | JUC0400008174.mm.1 | 3,33   | 0,000074 | 0,251428                     |      |
| TC0X00002423.mm.1 | -1,26 Xlr4c         | JUC0X00007631.mm.1 | 3,33   | 0,019511 | 0,474538                     |      |
| TC1000002702.mm.1 | 1,17 Vezt; Mir331   | PSR1000020790.mm.1 | 3,32   | 0,025187 | 0,496653 Cassette Exon       | 0,29 |
| TC1000002702.mm.1 | 1,17 Vezt; Mir331   | JUC1000011432.mm.1 | -2,03  | 0,009311 | 0,414883                     |      |
| TC1300001012.mm.1 | -1,57 Tmem167       | PSR1300006471.mm.1 | 3,32   | 0,016286 | 0,458454 Alternative 5' Donc | 0,27 |
| TC1300001012.mm.1 | -1,57 Tmem167       | JUC1300003393.mm.1 | -2,25  | 0,014989 | 0,452048                     |      |
| TC0200001620.mm.1 | -1,05 Kif18a        | JUC0200006021.mm.1 | 3,32   | 0,040368 | 0,541959                     |      |
| TC0200001620.mm.1 | -1,05 Kif18a        | PSR0200012093.mm.1 | -2,32  | 0,042855 | 0,548131 Alternative 5' Donc | 0,24 |
| TC0200001620.mm.1 | -1,05 Kif18a        | JUC0200006020.mm.1 | -2,61  | 0,02163  | 0,483552                     |      |
| TC0300001231.mm.1 | -1,36               | JUC0300005166.mm.1 | 3,32   | 0,01251  | 0,435429                     |      |
| TC1800000754.mm.1 | -1,29               | JUC1800003022.mm.1 | 3,32   | 0,043585 | 0,550052                     |      |
| TC1800000754.mm.1 | -1,29               | JUC1800003024.mm.1 | 2,71   | 0,008397 | 0,406601                     |      |
| TC1500000125.mm.1 | 1,41 Cdh10          | JUC1500000656.mm.1 | 3,32   | 0,003342 | 0,354243                     |      |
| TC1500000125.mm.1 | 1,41 Cdh10          | JUC1500000662.mm.1 | 2,15   | 0,023043 | 0,489301                     |      |

|                   |                               |                    |       |          |          |                          |
|-------------------|-------------------------------|--------------------|-------|----------|----------|--------------------------|
| TC0800000516.mm.1 | -1,05 Sorbs2; LOC100861925; G | JUC0800001934.mm.1 | 3,32  | 0,03917  | 0,538679 |                          |
| TC0600001890.mm.1 | -1,37 Tfec                    | JUC0600007769.mm.1 | 3,32  | 0,028016 | 0,505851 |                          |
| TC0500003008.mm.1 | -1,43 E130006D01Rik           | JUC0500014579.mm.1 | 3,32  | 0,003203 | 0,354243 |                          |
| TC1100003124.mm.1 | -1,22 Nlrp1a                  | JUC1100015155.mm.1 | 3,32  | 0,025891 | 0,498956 |                          |
| TC0300002153.mm.1 | 1,84 Slitrk3                  | JUC0300008492.mm.1 | 3,32  | 0,025776 | 0,498465 |                          |
| TC0900002338.mm.1 | 1,18 Scaper                   | JUC0900011085.mm.1 | 3,32  | 0,003733 | 0,357586 |                          |
| TC0400002578.mm.1 | -1,74 Slc25a51; Gm25692       | JUC0400010904.mm.1 | 3,32  | 0,000769 | 0,308403 |                          |
| TC0400002578.mm.1 | -1,74 Slc25a51; Gm25692       | JUC0400010902.mm.1 | 3,08  | 0,000823 | 0,311886 |                          |
| TC0400002578.mm.1 | -1,74 Slc25a51; Gm25692       | PSR0400021025.mm.1 | 2,67  | 0,003503 | 0,355749 |                          |
| TC0300002242.mm.1 | 1,77 Trim2                    | JUC0300008876.mm.1 | 3,31  | 0,007155 | 0,397804 |                          |
| TC0300002242.mm.1 | 1,77 Trim2                    | PSR0300016879.mm.1 | 2,44  | 0,006953 | 0,395699 | Alternative 3' Acce 0,19 |
| TC0300002242.mm.1 | 1,77 Trim2                    | PSR0300016907.mm.1 | -2,01 | 0,029543 | 0,510303 | Cassette Exon 0,03       |
| TC0300002242.mm.1 | 1,77 Trim2                    | PSR0300016857.mm.1 | -2,07 | 0,0117   | 0,429969 | Cassette Exon 0,11       |
| TC0300002242.mm.1 | 1,77 Trim2                    | PSR0300016906.mm.1 | -2,13 | 0,039854 | 0,54093  | Alternative 3' Acce 0,02 |
| TC0300002242.mm.1 | 1,77 Trim2                    | PSR0300016910.mm.1 | -2,17 | 0,023805 | 0,491893 | Alternative 5' Donc 0,15 |
| TC0300002242.mm.1 | 1,77 Trim2                    | JUC0300008883.mm.1 | -2,35 | 0,030883 | 0,514551 |                          |
| TC0300002242.mm.1 | 1,77 Trim2                    | JUC0300008878.mm.1 | -2,87 | 0,004291 | 0,363973 |                          |
| TC0300002242.mm.1 | 1,77 Trim2                    | PSR0300016903.mm.1 | -3,42 | 0,024366 | 0,49362  | Alternative 5' Donc 0,29 |
| TC0200003373.mm.1 | 1,47 Ttl11                    | JUC0200014650.mm.1 | 3,31  | 0,02754  | 0,504368 |                          |
| TC0200003373.mm.1 | 1,47 Ttl11                    | PSR0200029011.mm.1 | 3     | 0,002439 | 0,349135 | Cassette Exon 0,28       |
| TC0200003373.mm.1 | 1,47 Ttl11                    | JUC0200014656.mm.1 | -2,67 | 0,013328 | 0,441836 |                          |
| TC0200003373.mm.1 | 1,47 Ttl11                    | JUC0200014654.mm.1 | -2,82 | 0,000025 | 0,225289 |                          |
| TC0600001958.mm.1 | 1,97 Grm8; Mir592             | PSR0600015338.mm.1 | 3,31  | 0,020373 | 0,477557 | Cassette Exon 0,26       |
| TC0600001958.mm.1 | 1,97 Grm8; Mir592             | JUC0600008032.mm.1 | 2,61  | 0,002873 | 0,352207 |                          |
| TC0600001958.mm.1 | 1,97 Grm8; Mir592             | PSR0600015341.mm.1 | 2,18  | 0,007811 | 0,403089 | Cassette Exon 0,12       |
| TC0600001958.mm.1 | 1,97 Grm8; Mir592             | PSR0600015335.mm.1 | 2,11  | 0,026628 | 0,50179  | Cassette Exon 0,11       |
| TC0600001958.mm.1 | 1,97 Grm8; Mir592             | PSR0600015337.mm.1 | 2,11  | 0,006026 | 0,386586 | Cassette Exon 0,11       |
| TC0600001958.mm.1 | 1,97 Grm8; Mir592             | PSR0600015339.mm.1 | 2,1   | 0,015697 | 0,455416 | Cassette Exon 0,22       |
| TC0600001958.mm.1 | 1,97 Grm8; Mir592             | PSR0600015351.mm.1 | -2,34 | 0,014876 | 0,451677 | Alternative 5' Donc 0,21 |
| TC0600001958.mm.1 | 1,97 Grm8; Mir592             | PSR0600015345.mm.1 | -3,19 | 0,018256 | 0,467907 | Cassette Exon 0,11       |
| TC0600001958.mm.1 | 1,97 Grm8; Mir592             | PSR0600015356.mm.1 | -3,9  | 0,010631 | 0,422841 | Cassette Exon 0,27       |
| TC0500000466.mm.1 | 1,37 Bst1                     | JUC0500002519.mm.1 | 3,31  | 0,024906 | 0,495688 |                          |
| TC0500000466.mm.1 | 1,37 Bst1                     | JUC0500002524.mm.1 | 2,82  | 0,000824 | 0,311886 |                          |
| TC0500000466.mm.1 | 1,37 Bst1                     | PSR0500004509.mm.1 | 2,64  | 0,011762 | 0,430069 | Cassette Exon 0,17       |
| TC0500000466.mm.1 | 1,37 Bst1                     | JUC0500002525.mm.1 | -2,08 | 0,008423 | 0,406611 |                          |
| TC0200002735.mm.1 | 1,23 2210418O10Rik; Gm1725    | JUC0200011321.mm.1 | 3,31  | 0,02613  | 0,499897 |                          |
| TC0300001247.mm.1 | -1,09 Bcar3                   | JUC0300005313.mm.1 | 3,31  | 0,002154 | 0,343877 |                          |
| TC0100000658.mm.1 | -1,05 Speg                    | JUC0100003216.mm.1 | 3,31  | 0,008864 | 0,410539 |                          |
| TC0100000658.mm.1 | -1,05 Speg                    | JUC0100003223.mm.1 | 2,14  | 0,004059 | 0,361877 |                          |
| TC0200001387.mm.1 | -2,29                         | PSR0200010911.mm.1 | 3,31  | 0,004852 | 0,37168  |                          |
| TC0100000638.mm.1 | -1,1 Bcs1l                    | JUC0100003032.mm.1 | 3,31  | 0,023229 | 0,490032 |                          |
| TC0200001794.mm.1 | -1,16 Snap23                  | JUC0200006872.mm.1 | 3,31  | 0,027408 | 0,503961 |                          |
| TC0700002938.mm.1 | -1,02 Vmn2r63                 | JUC0700013906.mm.1 | 3,31  | 0,018925 | 0,47133  |                          |
| TC1100000374.mm.1 | -1,29 Slit3                   | JUC1100001660.mm.1 | 3,31  | 0,015839 | 0,456215 |                          |
| TC1100000374.mm.1 | -1,29 Slit3                   | JUC1100001642.mm.1 | 2,62  | 0,003083 | 0,353892 |                          |
| TC1100002180.mm.1 | 1,05 Nacad                    | JUC1100011078.mm.1 | 3,31  | 0,026564 | 0,501526 |                          |
| TC1100002180.mm.1 | 1,05 Nacad                    | JUC1100011076.mm.1 | -2,73 | 0,001812 | 0,336654 |                          |
| TC0Y00000293.mm.1 | -1,37 Gm21488                 | JUC0Y00001252.mm.1 | 3,31  | 0,018794 | 0,470789 |                          |



|                   |               |                    |       |          |                              |      |
|-------------------|---------------|--------------------|-------|----------|------------------------------|------|
| TC0Y00000292.mm.1 | -1,37 Gm20890 | JUC0Y00001243.mm.1 | 3,31  | 0,018794 | 0,470789                     |      |
| TC0600003074.mm.1 | 2,78 Slc2a3   | JUC0600012413.mm.1 | 3,3   | 0,031845 | 0,517896                     |      |
| TC0600003074.mm.1 | 2,78 Slc2a3   | PSR0600023811.mm.1 | -2,37 | 0,00942  | 0,41597 Alternative 3' Acce  | 0,23 |
| TC0600003074.mm.1 | 2,78 Slc2a3   | PSR0600023837.mm.1 | -2,48 | 0,029139 | 0,509333 Cassette Exon       | 0,17 |
| TC0600003074.mm.1 | 2,78 Slc2a3   | PSR0600023836.mm.1 | -2,64 | 0,008418 | 0,406611 Cassette Exon       | 0,32 |
| TC0600003074.mm.1 | 2,78 Slc2a3   | PSR0600023818.mm.1 | -2,87 | 0,035766 | 0,529126 Alternative 5' Donc | 0,25 |
| TC0600003074.mm.1 | 2,78 Slc2a3   | PSR0600023812.mm.1 | -3,53 | 0,013656 | 0,444386 Alternative 3' Acce | 0,32 |
| TC0600003074.mm.1 | 2,78 Slc2a3   | PSR0600023834.mm.1 | -3,55 | 0,021851 | 0,484607 Cassette Exon       | 0,03 |
| TC0600003074.mm.1 | 2,78 Slc2a3   | PSR0600023833.mm.1 | -4,17 | 0,022084 | 0,485424 Alternative 5' Donc | 0,47 |
| TC0600003074.mm.1 | 2,78 Slc2a3   | JUC0600012420.mm.1 | -4,33 | 0,026739 | 0,502096                     |      |
| TC0600003074.mm.1 | 2,78 Slc2a3   | JUC0600012418.mm.1 | -4,48 | 0,035696 | 0,529027                     |      |
| TC0600003074.mm.1 | 2,78 Slc2a3   | JUC0600012421.mm.1 | -4,55 | 0,03099  | 0,514765                     |      |
| TC0600001953.mm.1 | 3,36 Gpr37    | PSR0600015281.mm.1 | 3,3   | 0,00443  | 0,366832 Cassette Exon       | 0,22 |
| TC0600001953.mm.1 | 3,36 Gpr37    | PSR0600015283.mm.1 | -3,42 | 0,000612 | 0,304044 Alternative 5' Donc | 0,43 |
| TC0600001953.mm.1 | 3,36 Gpr37    | PSR0600015284.mm.1 | -4,73 | 0,002217 | 0,345773 Alternative 5' Donc | 0,43 |
| TC0400001391.mm.1 | 1,58 Hpcal4   | PSR0400010490.mm.1 | 3,3   | 0,003701 | 0,357266 Alternative 5' Donc | 0,29 |
| TC0400001391.mm.1 | 1,58 Hpcal4   | PSR0400010489.mm.1 | 2,32  | 0,006288 | 0,388916 Alternative 5' Donc | 0,29 |
| TC0400001391.mm.1 | 1,58 Hpcal4   | PSR0400010491.mm.1 | 2,3   | 0,032415 | 0,519327 Alternative 5' Donc | 0,26 |
| TC0400001391.mm.1 | 1,58 Hpcal4   | PSR0400010481.mm.1 | -2,4  | 0,006034 | 0,386586 Alternative 3' Acce | 0,17 |
| TC1000001466.mm.1 | 1,99 Grip1    | JUC1000005608.mm.1 | 3,3   | 0,002905 | 0,352262                     |      |
| TC1000001466.mm.1 | 1,99 Grip1    | JUC1000005607.mm.1 | 3,01  | 0,003029 | 0,353543                     |      |
| TC1000001466.mm.1 | 1,99 Grip1    | PSR1000010451.mm.1 | 2,13  | 0,000657 | 0,304044 Cassette Exon       | 0,21 |
| TC1000001466.mm.1 | 1,99 Grip1    | PSR1000010434.mm.1 | -2,17 | 0,016626 | 0,459985 Cassette Exon       | 0,07 |
| TC1000001466.mm.1 | 1,99 Grip1    | PSR1000010439.mm.1 | -2,35 | 0,024917 | 0,4958 Alternative 5' Donc   | 0,11 |
| TC1000001466.mm.1 | 1,99 Grip1    | JUC1000005609.mm.1 | -2,63 | 0,049548 | 0,563325                     |      |
| TC1000001466.mm.1 | 1,99 Grip1    | PSR1000010411.mm.1 | -2,67 | 0,003694 | 0,357266 Cassette Exon       | 0,23 |
| TC1000001466.mm.1 | 1,99 Grip1    | JUC1000005597.mm.1 | -2,69 | 0,00257  | 0,349501                     |      |
| TC1000001466.mm.1 | 1,99 Grip1    | PSR1000010418.mm.1 | -2,96 | 0,004531 | 0,368648 Cassette Exon       | 0,07 |
| TC1000001466.mm.1 | 1,99 Grip1    | JUC1000005588.mm.1 | -4,54 | 0,017173 | 0,46232                      |      |
| TC1000001466.mm.1 | 1,99 Grip1    | PSR1000010420.mm.1 | -4,73 | 0,001056 | 0,316361 Cassette Exon       | 0,27 |
| TC1400001536.mm.1 | 1 Ttc18       | JUC1400006143.mm.1 | 3,3   | 0,013837 | 0,445311                     |      |
| TC1200002224.mm.1 | 1,26 Ttc7b    | JUC1200008444.mm.1 | 3,3   | 0,00868  | 0,408815                     |      |
| TC1200002224.mm.1 | 1,26 Ttc7b    | JUC1200008446.mm.1 | 2,1   | 0,037411 | 0,533831                     |      |
| TC1900000944.mm.1 | 1,09 Npas4    | JUC1900004588.mm.1 | 3,3   | 0,012395 | 0,434939                     |      |
| TC0100003318.mm.1 | -1,23 Axdnd1  | JUC0100015495.mm.1 | 3,3   | 0,000668 | 0,304088                     |      |
| TC0100003318.mm.1 | -1,23 Axdnd1  | JUC0100015521.mm.1 | -3,75 | 0,024725 | 0,494838                     |      |
| TC0500000215.mm.1 | 1,11 Slc4a2   | JUC0500000927.mm.1 | 3,3   | 0,049543 | 0,563325                     |      |
| TC0900001463.mm.1 | -1,24 Setd2   | JUC0900006822.mm.1 | 3,3   | 0,013475 | 0,442984                     |      |
| TC0900001463.mm.1 | -1,24 Setd2   | JUC0900006830.mm.1 | 3,24  | 0,041006 | 0,543644                     |      |
| TC0900001463.mm.1 | -1,24 Setd2   | JUC0900006846.mm.1 | -2,94 | 0,028361 | 0,506881                     |      |
| TC0500001492.mm.1 | -1,1          | JUC0500007359.mm.1 | 3,3   | 0,019015 | 0,471745                     |      |
| TC0200000347.mm.1 | 1,95 Gad2     | PSR0200001683.mm.1 | 3,29  | 0,000156 | 0,272178 Cassette Exon       | 0,22 |
| TC0200000347.mm.1 | 1,95 Gad2     | PSR0200001684.mm.1 | 3,11  | 0,000144 | 0,272178 Cassette Exon       | 0,2  |
| TC0200000347.mm.1 | 1,95 Gad2     | PSR0200001682.mm.1 | 2,28  | 0,011098 | 0,426 Cassette Exon          | 0,16 |
| TC0200000347.mm.1 | 1,95 Gad2     | PSR0200001685.mm.1 | 2,11  | 0,018149 | 0,467399 Alternative 3' Acce | 0,19 |
| TC0200000347.mm.1 | 1,95 Gad2     | PSR0200001677.mm.1 | 2,09  | 0,035585 | 0,528808 Cassette Exon       | 0,07 |
| TC0200000347.mm.1 | 1,95 Gad2     | JUC0200000748.mm.1 | -2,3  | 0,010282 | 0,42034                      |      |
| TC0200000347.mm.1 | 1,95 Gad2     | PSR0200001673.mm.1 | -2,31 | 0,002579 | 0,349501 Alternative 5' Donc | 0,2  |

|                   |                               |                    |       |          |                              |      |
|-------------------|-------------------------------|--------------------|-------|----------|------------------------------|------|
| TC0200000347.mm.1 | 1,95 Gad2                     | PSR0200001663.mm.1 | -2,41 | 0,013411 | 0,442624 Cassette Exon       | 0,15 |
| TC0200000347.mm.1 | 1,95 Gad2                     | PSR0200001665.mm.1 | -3,42 | 0,001418 | 0,327189 Cassette Exon       | 0,26 |
| TC0200000347.mm.1 | 1,95 Gad2                     | JUC0200000750.mm.1 | -3,91 | 0,010111 | 0,418998                     |      |
| TC0200000347.mm.1 | 1,95 Gad2                     | PSR0200001666.mm.1 | -4,84 | 0,005608 | 0,381115 Alternative 3' Acce | 0,35 |
| TC0600001103.mm.1 | -1,06 9530026P05Rik; LOC10051 | JUC0600004439.mm.1 | 3,29  | 0,012217 | 0,433321                     |      |
| TC0600001103.mm.1 | -1,06 9530026P05Rik; LOC10051 | PSR0600008705.mm.1 | -3,18 | 0,005806 | 0,383104 Alternative 5' Donc | 0,19 |
| TC0500002752.mm.1 | 3,86 Ppef2                    | JUC0500013205.mm.1 | 3,29  | 0,001912 | 0,339584                     |      |
| TC0500002752.mm.1 | 3,86 Ppef2                    | JUC0500013198.mm.1 | 2,89  | 0,042306 | 0,547224                     |      |
| TC0500002752.mm.1 | 3,86 Ppef2                    | JUC0500013195.mm.1 | 2,05  | 0,011377 | 0,427487                     |      |
| TC0500002752.mm.1 | 3,86 Ppef2                    | PSR0500024228.mm.1 | -2,24 | 0,031379 | 0,516345 Alternative 3' Acce | 0,15 |
| TC0500002752.mm.1 | 3,86 Ppef2                    | PSR0500024235.mm.1 | -2,42 | 0,021253 | 0,481431 Cassette Exon       | 0,16 |
| TC0500002752.mm.1 | 3,86 Ppef2                    | PSR0500024244.mm.1 | -2,42 | 0,001638 | 0,33312 Cassette Exon        | 0,15 |
| TC0500002752.mm.1 | 3,86 Ppef2                    | JUC0500013197.mm.1 | -4,25 | 0,000608 | 0,304044                     |      |
| TC0400000271.mm.1 | 1,16 Mdn1                     | JUC0400000854.mm.1 | 3,29  | 0,033704 | 0,523549                     |      |
| TC0400000271.mm.1 | 1,16 Mdn1                     | PSR0400001632.mm.1 | 2,61  | 0,019998 | 0,476227 Cassette Exon       | 0,15 |
| TC0400000271.mm.1 | 1,16 Mdn1                     | JUC0400000795.mm.1 | 2,05  | 0,01733  | 0,463416                     |      |
| TC0300003156.mm.1 | -1,97                         | JUC0300012983.mm.1 | 3,29  | 0,004077 | 0,36209                      |      |
| TC0300003156.mm.1 | -1,97                         | PSR0300024745.mm.1 | 2,19  | 0,030131 | 0,512017 Cassette Exon       | 0,11 |
| TC0300003156.mm.1 | -1,97                         | JUC0300012982.mm.1 | 2,02  | 0,001131 | 0,317328                     |      |
| TC1500002040.mm.1 | -1,12 Plxnb2                  | JUC1500009286.mm.1 | 3,29  | 0,019585 | 0,474672                     |      |
| TC1500002040.mm.1 | -1,12 Plxnb2                  | PSR1500016284.mm.1 | -2,4  | 0,00813  | 0,405267 Alternative 3' Acce | 0,1  |
| TC1400000808.mm.1 | -1,46 Parp4                   | JUC1400003552.mm.1 | 3,29  | 0,025849 | 0,498657                     |      |
| TC0200005354.mm.1 | 1,27 Gm14296; 2210418O10Ril   | JUC0200023470.mm.1 | 3,29  | 0,027306 | 0,503732                     |      |
| TC1300001178.mm.1 | -1,44 Srek1ip1                | JUC1300003923.mm.1 | 3,29  | 0,013062 | 0,439579                     |      |
| TC0500000317.mm.1 | 1,01 Nrbp1                    | JUC0500001522.mm.1 | 3,29  | 0,002546 | 0,349501                     |      |
| TC0600001373.mm.1 | -1,14 Mug1                    | JUC0600005760.mm.1 | 3,29  | 0,005151 | 0,37646                      |      |
| TC1000001465.mm.1 | -1,35 1700025F24Rik           | JUC1000005586.mm.1 | 3,29  | 0,009089 | 0,412827                     |      |
| TC0400001539.mm.1 | -1,18 Col16a1                 | JUC0400006313.mm.1 | 3,29  | 0,003356 | 0,354243                     |      |
| TC0400001539.mm.1 | -1,18 Col16a1                 | JUC0400006261.mm.1 | 2,15  | 0,000555 | 0,304044                     |      |
| TC0Y00000193.mm.1 | -1,24 Gm20870; Gm20736        | JUC0Y00000698.mm.1 | 3,29  | 0,010097 | 0,418998                     |      |
| TC0Y00000213.mm.1 | -1,45 Gm20906; Gm20736        | JUC0Y00000862.mm.1 | 3,29  | 0,008872 | 0,410554                     |      |
| TC0200002072.mm.1 | 8,1 Lamp5                     | PSR0200016482.mm.1 | 3,28  | 0,003143 | 0,353892 Cassette Exon       | 0,29 |
| TC0200002072.mm.1 | 8,1 Lamp5                     | JUC0200008307.mm.1 | 2,68  | 0,013006 | 0,439291                     |      |
| TC0200002072.mm.1 | 8,1 Lamp5                     | JUC0200008305.mm.1 | -4,04 | 0,030903 | 0,514574                     |      |
| TC0200002072.mm.1 | 8,1 Lamp5                     | PSR0200016472.mm.1 | -4,83 | 0,005903 | 0,383835 Cassette Exon       | 0,41 |
| TC0200002072.mm.1 | 8,1 Lamp5                     | PSR0200016481.mm.1 | -4,98 | 0,000718 | 0,306015 Alternative 3' Acce | 0,32 |
| TC0200002072.mm.1 | 8,1 Lamp5                     | PSR0200016478.mm.1 | -5,87 | 0,003448 | 0,3554 Intron Retention      | 0,74 |
| TC0200002072.mm.1 | 8,1 Lamp5                     | PSR0200016479.mm.1 | -6,03 | 0,003227 | 0,354243 Intron Retention    | 0,74 |
| TC0200002072.mm.1 | 8,1 Lamp5                     | PSR0200016474.mm.1 | -6,47 | 0,000803 | 0,311765 Alternative 3' Acce | 0,57 |
| TC0200002072.mm.1 | 8,1 Lamp5                     | PSR0200016485.mm.1 | -6,48 | 0,00274  | 0,349612 Alternative 5' Donc | 0,44 |
| TC0200002072.mm.1 | 8,1 Lamp5                     | JUC0200008304.mm.1 | -8,74 | 0,000265 | 0,28803                      |      |
| TC0200002072.mm.1 | 8,1 Lamp5                     | PSR0200016477.mm.1 | -12,6 | 0,002261 | 0,34578 Intron Retention     | 0,74 |
| TC1400002641.mm.1 | -2,7 Ednrb                    | PSR1400019790.mm.1 | 3,28  | 0,011017 | 0,425624 Alternative 5' Donc | 0,26 |
| TC0800000049.mm.1 | -1,57 Gm17215                 | PSR0800000511.mm.1 | 3,28  | 0,04008  | 0,541392 Cassette Exon       | 0,24 |
| TC1000002406.mm.1 | 1,13 Col6a1                   | JUC1000009551.mm.1 | 3,28  | 0,007927 | 0,403819                     |      |
| TC1000002406.mm.1 | 1,13 Col6a1                   | PSR1000017406.mm.1 | -2,31 | 0,000238 | 0,28803 Cassette Exon        | 0,12 |
| TC1000002406.mm.1 | 1,13 Col6a1                   | PSR1000017420.mm.1 | -2,42 | 0,002478 | 0,349135 Alternative 5' Donc | 0,23 |
| TC1000002406.mm.1 | 1,13 Col6a1                   | JUC1000009547.mm.1 | -2,46 | 0,013178 | 0,44063                      |      |

|                   |                      |                    |       |          |          |                          |
|-------------------|----------------------|--------------------|-------|----------|----------|--------------------------|
| TC0400002233.mm.1 | -1,08 Lrrc69         | JUC0400009761.mm.1 | 3,28  | 0,010745 | 0,423772 |                          |
| TC0400002233.mm.1 | -1,08 Lrrc69         | PSR0400018665.mm.1 | 2,45  | 0,01276  | 0,436997 | Cassette Exon 0,22       |
| TC0200000741.mm.1 | 1,3 Arhgap15         | PSR0200006410.mm.1 | 3,28  | 0,019916 | 0,475879 | Cassette Exon 0,21       |
| TC0200002558.mm.1 | -1,2 Ncoa3           | JUC0200010688.mm.1 | 3,28  | 0,011139 | 0,426226 |                          |
| TC0200004548.mm.1 | -1,14 Itpr1          | JUC0200020175.mm.1 | 3,28  | 0,023063 | 0,489502 |                          |
| TC0100003191.mm.1 | -1,36 Cfhr2; Gm16332 | JUC0100014729.mm.1 | 3,28  | 0,033996 | 0,524346 |                          |
| TC1500002035.mm.1 | -3,26 1810021B22Rik  | JUC1500009171.mm.1 | 3,28  | 0,021847 | 0,484607 |                          |
| TC1500002035.mm.1 | -3,26 1810021B22Rik  | JUC1500009165.mm.1 | 2,79  | 0,011451 | 0,427811 |                          |
| TC0600000308.mm.1 | 1,14 Exoc4           | JUC0600001158.mm.1 | 3,28  | 0,031862 | 0,517902 |                          |
| TC0300002779.mm.1 | -1,15 Amy2-ps1       | JUC0300011386.mm.1 | 3,28  | 0,015202 | 0,452738 |                          |
| TC0300002674.mm.1 | -1,04 Rap1a          | JUC0300010838.mm.1 | 3,28  | 0,003762 | 0,357586 |                          |
| TC1000000696.mm.1 | 3,9 Pcdh15           | JUC1000002651.mm.1 | 3,27  | 0,033589 | 0,523246 |                          |
| TC1000000696.mm.1 | 3,9 Pcdh15           | JUC1000002634.mm.1 | 2,18  | 0,037345 | 0,533573 |                          |
| TC1000000696.mm.1 | 3,9 Pcdh15           | PSR1000004883.mm.1 | -2,09 | 0,003928 | 0,359818 |                          |
| TC1000000696.mm.1 | 3,9 Pcdh15           | PSR1000004890.mm.1 | -2,18 | 0,020761 | 0,479263 |                          |
| TC1000000696.mm.1 | 3,9 Pcdh15           | PSR1000004898.mm.1 | -2,31 | 0,047024 | 0,557783 | Cassette Exon 0,27       |
| TC1000000696.mm.1 | 3,9 Pcdh15           | PSR1000004855.mm.1 | -2,55 | 0,036525 | 0,531352 | Cassette Exon 0,35       |
| TC1000000696.mm.1 | 3,9 Pcdh15           | PSR1000004904.mm.1 | -2,55 | 0,001222 | 0,322251 | Cassette Exon 0,11       |
| TC1000000696.mm.1 | 3,9 Pcdh15           | PSR1000004922.mm.1 | -2,57 | 0,031504 | 0,516965 | Cassette Exon 0,18       |
| TC1000000696.mm.1 | 3,9 Pcdh15           | JUC1000002633.mm.1 | -2,64 | 0,000342 | 0,289576 |                          |
| TC1000000696.mm.1 | 3,9 Pcdh15           | PSR1000004913.mm.1 | -2,65 | 0,002653 | 0,349612 | Alternative 3' Acce 0,26 |
| TC1000000696.mm.1 | 3,9 Pcdh15           | JUC1000002653.mm.1 | -2,66 | 0,043356 | 0,549429 |                          |
| TC1000000696.mm.1 | 3,9 Pcdh15           | JUC1000002668.mm.1 | -2,7  | 0,009698 | 0,417707 |                          |
| TC1000000696.mm.1 | 3,9 Pcdh15           | JUC1000002677.mm.1 | -2,9  | 0,042327 | 0,547323 |                          |
| TC1000000696.mm.1 | 3,9 Pcdh15           | JUC1000002690.mm.1 | -2,9  | 0,027566 | 0,50444  |                          |
| TC1000000696.mm.1 | 3,9 Pcdh15           | PSR1000004910.mm.1 | -2,91 | 0,006206 | 0,387873 | Cassette Exon 0,05       |
| TC1000000696.mm.1 | 3,9 Pcdh15           | JUC1000002687.mm.1 | -3    | 0,00218  | 0,344453 |                          |
| TC1000000696.mm.1 | 3,9 Pcdh15           | JUC1000002682.mm.1 | -3,05 | 0,011377 | 0,427487 |                          |
| TC1000000696.mm.1 | 3,9 Pcdh15           | PSR1000004903.mm.1 | -3,13 | 0,030237 | 0,512468 | Cassette Exon 0,17       |
| TC1000000696.mm.1 | 3,9 Pcdh15           | PSR1000004906.mm.1 | -3,2  | 0,021457 | 0,482386 | Alternative 5' Donc 0,22 |
| TC1000000696.mm.1 | 3,9 Pcdh15           | PSR1000004881.mm.1 | -3,54 | 0,007105 | 0,396897 | Cassette Exon 0,03       |
| TC1000000696.mm.1 | 3,9 Pcdh15           | JUC1000002683.mm.1 | -3,56 | 0,03295  | 0,52122  |                          |
| TC1000000696.mm.1 | 3,9 Pcdh15           | PSR1000004889.mm.1 | -3,73 | 0,015168 | 0,452699 | Alternative 5' Donc 0,22 |
| TC1000000696.mm.1 | 3,9 Pcdh15           | JUC1000002638.mm.1 | -3,73 | 0,00651  | 0,391307 |                          |
| TC1000000696.mm.1 | 3,9 Pcdh15           | JUC1000002674.mm.1 | -3,78 | 0,042194 | 0,546939 |                          |
| TC1000000696.mm.1 | 3,9 Pcdh15           | JUC1000002688.mm.1 | -4,09 | 0,022054 | 0,485327 |                          |
| TC1000000696.mm.1 | 3,9 Pcdh15           | PSR1000004923.mm.1 | -4,13 | 0,007298 | 0,398847 | Cassette Exon 0,28       |
| TC1000000696.mm.1 | 3,9 Pcdh15           | PSR1000004859.mm.1 | -4,18 | 0,007913 | 0,403819 | Alternative 3' Acce 0,48 |
| TC1000000696.mm.1 | 3,9 Pcdh15           | PSR1000004853.mm.1 | -4,22 | 0,01092  | 0,424705 | Cassette Exon 0,41       |
| TC1000000696.mm.1 | 3,9 Pcdh15           | JUC1000002658.mm.1 | -4,96 | 0,020574 | 0,478487 |                          |
| TC1000000696.mm.1 | 3,9 Pcdh15           | PSR1000004852.mm.1 | -5,16 | 0,036627 | 0,531552 | Cassette Exon 0,41       |
| TC1000000696.mm.1 | 3,9 Pcdh15           | PSR1000004854.mm.1 | -5,18 | 0,017389 | 0,463716 | Cassette Exon 0,41       |
| TC1000000696.mm.1 | 3,9 Pcdh15           | JUC1000002639.mm.1 | -5,63 | 0,002303 | 0,346364 |                          |
| TC1000000696.mm.1 | 3,9 Pcdh15           | JUC1000002652.mm.1 | -5,65 | 0,002958 | 0,352501 |                          |
| TC1000000696.mm.1 | 3,9 Pcdh15           | JUC1000002637.mm.1 | -6,06 | 0,024983 | 0,496025 |                          |
| TC1000000696.mm.1 | 3,9 Pcdh15           | JUC1000002679.mm.1 | -6,1  | 0,023019 | 0,489186 |                          |
| TC1000000696.mm.1 | 3,9 Pcdh15           | JUC1000002669.mm.1 | -6,18 | 0,008895 | 0,410717 |                          |
| TC1000000696.mm.1 | 3,9 Pcdh15           | PSR1000004856.mm.1 | -6,25 | 0,007347 | 0,399281 | Cassette Exon 0,41       |

|                   |                                 |                    |        |          |          |                     |      |
|-------------------|---------------------------------|--------------------|--------|----------|----------|---------------------|------|
| TC100000696.mm.1  | 3,9 Pcdh15                      | JUC1000002660.mm.1 | -6,36  | 0,027881 | 0,505612 |                     |      |
| TC100000696.mm.1  | 3,9 Pcdh15                      | JUC1000002622.mm.1 | -6,74  | 0,010273 | 0,420305 |                     |      |
| TC100000696.mm.1  | 3,9 Pcdh15                      | JUC1000002620.mm.1 | -7,05  | 0,004451 | 0,367239 |                     |      |
| TC100000696.mm.1  | 3,9 Pcdh15                      | JUC1000002678.mm.1 | -7,07  | 0,003072 | 0,353892 |                     |      |
| TC100000696.mm.1  | 3,9 Pcdh15                      | JUC1000002689.mm.1 | -7,52  | 0,044352 | 0,551441 |                     |      |
| TC100000696.mm.1  | 3,9 Pcdh15                      | PSR1000004857.mm.1 | -9,04  | 0,003208 | 0,354243 | Cassette Exon       | 0,28 |
| TC100000696.mm.1  | 3,9 Pcdh15                      | JUC1000002686.mm.1 | -11,93 | 0,006523 | 0,391502 |                     |      |
| TC100000696.mm.1  | 3,9 Pcdh15                      | JUC1000002670.mm.1 | -17,7  | 0,001148 | 0,317344 |                     |      |
| TC100000696.mm.1  | 3,9 Pcdh15                      | JUC1000002666.mm.1 | -18,9  | 0,000816 | 0,311886 |                     |      |
| TC0500002528.mm.1 | 1,08 Atp8a1                     | JUC0500012248.mm.1 | 3,27   | 0,043047 | 0,54841  |                     |      |
| TC0500002528.mm.1 | 1,08 Atp8a1                     | PSR0500022509.mm.1 | 2,11   | 0,032793 | 0,520798 | Cassette Exon       | 0,21 |
| TC0500002528.mm.1 | 1,08 Atp8a1                     | PSR0500022513.mm.1 | -2,41  | 0,002846 | 0,352207 | Alternative 3' Acce | 0,24 |
| TC0100003860.mm.1 | -1,77 Lypla1                    | PSR0100000024.mm.1 | 3,27   | 0,005773 | 0,383104 | Cassette Exon       | 0,06 |
| TC0100003860.mm.1 | -1,77 Lypla1                    | JUC0100000004.mm.1 | 2,96   | 0,013554 | 0,443605 |                     |      |
| TC0100003860.mm.1 | -1,77 Lypla1                    | JUC0100000012.mm.1 | 2,29   | 0,021417 | 0,482126 |                     |      |
| TC0100003860.mm.1 | -1,77 Lypla1                    | PSR0100000032.mm.1 | 2,12   | 0,009813 | 0,417839 | Intron Retention    | 0,22 |
| TC0100003860.mm.1 | -1,77 Lypla1                    | PSR0100000045.mm.1 | 2,07   | 0,00074  | 0,307808 | Cassette Exon       | 0,16 |
| TC0100003860.mm.1 | -1,77 Lypla1                    | JUC0100000008.mm.1 | 2,05   | 0,018337 | 0,468212 |                     |      |
| TC0700003512.mm.1 | 1,17 St8sia2                    | JUC0700015711.mm.1 | 3,27   | 0,019254 | 0,473074 |                     |      |
| TC0700003512.mm.1 | 1,17 St8sia2                    | PSR0700029771.mm.1 | 3,23   | 0,035162 | 0,528029 | Cassette Exon       | 0,21 |
| TC1600000242.mm.1 | -1,41 Txnrd2                    | JUC1600001147.mm.1 | 3,27   | 0,005562 | 0,381231 |                     |      |
| TC1600000242.mm.1 | -1,41 Txnrd2                    | PSR1600002209.mm.1 | 2,16   | 0,042182 | 0,54689  | Cassette Exon       | 0,11 |
| TC1600000242.mm.1 | -1,41 Txnrd2                    | PSR1600002227.mm.1 | 2,14   | 0,04823  | 0,560257 | Cassette Exon       | 0,21 |
| TC1400000501.mm.1 | -1,83 Cdkn3                     | JUC1400002394.mm.1 | 3,27   | 0,022063 | 0,485335 |                     |      |
| TC0200004425.mm.1 | -1,07 Ppp1r14d                  | JUC0200018929.mm.1 | 3,27   | 0,000292 | 0,288663 |                     |      |
| TC1500000641.mm.1 | -1,23 Csf2rb; mmu-mir-7676-1; r | JUC1500002655.mm.1 | 3,27   | 0,028043 | 0,50586  |                     |      |
| TC1700000659.mm.1 | -1,15 Vwa7                      | JUC1700003669.mm.1 | 3,27   | 0,015302 | 0,45339  |                     |      |
| TC1700000659.mm.1 | -1,15 Vwa7                      | JUC1700003670.mm.1 | 2,38   | 0,002277 | 0,345991 |                     |      |
| TC0900000189.mm.1 | 1,03 Pde4a                      | JUC0900000614.mm.1 | 3,27   | 0,000667 | 0,304088 |                     |      |
| TC0800002021.mm.1 | -1,15 Dctn6                     | PSR0800015827.mm.1 | 3,26   | 0,027848 | 0,505597 | Alternative 3' Acce | 0,33 |
| TC0800002021.mm.1 | -1,15 Dctn6                     | JUC0800008646.mm.1 | 2,43   | 0,009094 | 0,412827 |                     |      |
| TC1200002523.mm.1 | -2,22 Fntb                      | PSR1200004913.mm.1 | 3,26   | 0,026377 | 0,501011 | Cassette Exon       | 0,26 |
| TC1200002523.mm.1 | -2,22 Fntb                      | PSR1200004899.mm.1 | 3,24   | 0,014928 | 0,451919 | Cassette Exon       | 0,27 |
| TC1200002523.mm.1 | -2,22 Fntb                      | PSR1200004900.mm.1 | 2,51   | 0,012954 | 0,438936 | Cassette Exon       | 0,07 |
| TC1200002523.mm.1 | -2,22 Fntb                      | PSR1200004905.mm.1 | 2,35   | 0,016724 | 0,460261 | Cassette Exon       | 0,08 |
| TC1200002523.mm.1 | -2,22 Fntb                      | PSR1200004917.mm.1 | 2,2    | 0,025527 | 0,497712 | Cassette Exon       | 0,09 |
| TC1200002523.mm.1 | -2,22 Fntb                      | PSR1200004912.mm.1 | 2,09   | 0,043507 | 0,549909 | Cassette Exon       | 0,16 |
| TC1200002523.mm.1 | -2,22 Fntb                      | PSR1200004901.mm.1 | 2,01   | 0,03314  | 0,521898 | Cassette Exon       | 0,05 |
| TC1700000159.mm.1 | -1,19 Mllt4                     | JUC1700000665.mm.1 | 3,26   | 0,034399 | 0,525736 |                     |      |
| TC1700000159.mm.1 | -1,19 Mllt4                     | JUC1700000672.mm.1 | 2,8    | 0,038602 | 0,536862 |                     |      |
| TC1700000159.mm.1 | -1,19 Mllt4                     | JUC1700000679.mm.1 | 2,71   | 0,002922 | 0,352289 |                     |      |
| TC1700000159.mm.1 | -1,19 Mllt4                     | PSR1700001240.mm.1 | 2,01   | 0,026145 | 0,500002 | Cassette Exon       | 0,24 |
| TC1000002249.mm.1 | -1,11 Col13a1                   | PSR1000015940.mm.1 | 3,26   | 0,03279  | 0,520798 | Cassette Exon       | 0,21 |
| TC1000002249.mm.1 | -1,11 Col13a1                   | PSR1000015946.mm.1 | -2,67  | 0,028969 | 0,508766 | Cassette Exon       | 0,11 |
| TC1000001701.mm.1 | -1,5 Ginm1; 6530403G13Rik       | JUC1000006746.mm.1 | 3,26   | 0,046901 | 0,557454 |                     |      |
| TC1000001701.mm.1 | -1,5 Ginm1; 6530403G13Rik       | PSR1000012449.mm.1 | 2,8    | 0,002121 | 0,342919 | Alternative 3' Acce | 0,07 |
| TC0100001644.mm.1 | -1,1 Spta1                      | JUC0100007719.mm.1 | 3,26   | 0,026706 | 0,502096 |                     |      |
| TC0100001644.mm.1 | -1,1 Spta1                      | JUC0100007720.mm.1 | -2,43  | 0,012278 | 0,434165 |                     |      |

|                   |       |               |                    |       |          |          |                          |
|-------------------|-------|---------------|--------------------|-------|----------|----------|--------------------------|
| TC0200001798.mm.1 | -1,23 | Stard9        | JUC0200006901.mm.1 | 3,26  | 0,030402 | 0,513014 |                          |
| TC1600001400.mm.1 | -1,06 | Bcl6          | JUC1600006056.mm.1 | 3,26  | 0,048934 | 0,5618   |                          |
| TC0700000351.mm.1 | 1,11  | Nlrp5         | JUC0700001277.mm.1 | 3,26  | 0,035246 | 0,52837  |                          |
| TC0700000351.mm.1 | 1,11  | Nlrp5         | JUC0700001276.mm.1 | 3,07  | 0,03343  | 0,522793 |                          |
| TC0700000351.mm.1 | 1,11  | Nlrp5         | JUC0700001274.mm.1 | 2,15  | 0,0263   | 0,500634 |                          |
| TC0700003559.mm.1 | 1,16  | Polg          | JUC0700015856.mm.1 | 3,26  | 0,007669 | 0,402377 |                          |
| TC0700003559.mm.1 | 1,16  | Polg          | JUC0700015846.mm.1 | 2,5   | 0,025082 | 0,496264 |                          |
| TC0700003559.mm.1 | 1,16  | Polg          | JUC0700015863.mm.1 | -2,23 | 0,03126  | 0,516001 |                          |
| TC0700003559.mm.1 | 1,16  | Polg          | JUC0700015865.mm.1 | -2,33 | 0,000444 | 0,297771 |                          |
| TC1100001204.mm.1 | -1,05 | Zfp207        | JUC1100005948.mm.1 | 3,26  | 0,012444 | 0,43528  |                          |
| TC1100001204.mm.1 | -1,05 | Zfp207        | JUC1100005944.mm.1 | 2,91  | 0,01863  | 0,469941 |                          |
| TC0700001795.mm.1 | 2,43  | D430042O09Rik | PSR0700015292.mm.1 | 3,25  | 0,000212 | 0,28803  | Mutually Exclusive 0,27  |
| TC0700001795.mm.1 | 2,43  | D430042O09Rik | JUC0700008041.mm.1 | -2,38 | 0,038368 | 0,536303 |                          |
| TC0700001795.mm.1 | 2,43  | D430042O09Rik | PSR0700015290.mm.1 | -2,41 | 0,045505 | 0,554359 | Mutually Exclusive 0,27  |
| TC0700001795.mm.1 | 2,43  | D430042O09Rik | JUC0700008013.mm.1 | -2,54 | 0,019723 | 0,474887 |                          |
| TC0700001795.mm.1 | 2,43  | D430042O09Rik | PSR0700015305.mm.1 | -2,59 | 0,013937 | 0,446202 | Alternative 5' Donc 0,16 |
| TC0700001795.mm.1 | 2,43  | D430042O09Rik | JUC0700008016.mm.1 | -2,6  | 0,014161 | 0,447466 |                          |
| TC0700001795.mm.1 | 2,43  | D430042O09Rik | JUC0700008038.mm.1 | -2,61 | 0,043188 | 0,548921 |                          |
| TC0700001795.mm.1 | 2,43  | D430042O09Rik | PSR0700015273.mm.1 | -2,62 | 0,014416 | 0,448786 | Alternative 5' Donc 0,14 |
| TC0700001795.mm.1 | 2,43  | D430042O09Rik | PSR0700015284.mm.1 | -2,68 | 0,020221 | 0,477145 | Cassette Exon 0,36       |
| TC0700001795.mm.1 | 2,43  | D430042O09Rik | PSR0700015287.mm.1 | -2,76 | 0,011726 | 0,429969 | Cassette Exon 0,32       |
| TC0700001795.mm.1 | 2,43  | D430042O09Rik | PSR0700015274.mm.1 | -2,94 | 0,044754 | 0,552348 | Alternative 5' Donc 0,14 |
| TC0700001795.mm.1 | 2,43  | D430042O09Rik | PSR0700015280.mm.1 | -2,97 | 0,002838 | 0,352207 | Cassette Exon 0,22       |
| TC0700001795.mm.1 | 2,43  | D430042O09Rik | JUC0700008017.mm.1 | -2,98 | 0,012933 | 0,438537 |                          |
| TC0700001795.mm.1 | 2,43  | D430042O09Rik | PSR0700015285.mm.1 | -3,07 | 0,018251 | 0,467881 | Cassette Exon 0,33       |
| TC0700001795.mm.1 | 2,43  | D430042O09Rik | PSR0700015283.mm.1 | -3,12 | 0,019039 | 0,471934 | Cassette Exon 0,17       |
| TC0700001795.mm.1 | 2,43  | D430042O09Rik | JUC0700008019.mm.1 | -3,25 | 0,038504 | 0,536557 |                          |
| TC0700001795.mm.1 | 2,43  | D430042O09Rik | PSR0700015282.mm.1 | -3,36 | 0,007469 | 0,400381 | Cassette Exon 0,29       |
| TC0700001795.mm.1 | 2,43  | D430042O09Rik | PSR0700015278.mm.1 | -3,43 | 0,004896 | 0,372257 | Cassette Exon 0,31       |
| TC0700001795.mm.1 | 2,43  | D430042O09Rik | JUC0700008040.mm.1 | -3,66 | 0,039372 | 0,539409 |                          |
| TC0700001795.mm.1 | 2,43  | D430042O09Rik | PSR0700015286.mm.1 | -3,98 | 0,010927 | 0,424768 | Cassette Exon 0,35       |
| TC0700001795.mm.1 | 2,43  | D430042O09Rik | JUC0700008018.mm.1 | -3,99 | 0,014601 | 0,449914 |                          |
| TC0700001795.mm.1 | 2,43  | D430042O09Rik | JUC0700008036.mm.1 | -4,08 | 0,016661 | 0,460023 |                          |
| TC0700001795.mm.1 | 2,43  | D430042O09Rik | JUC0700008014.mm.1 | -4,3  | 0,037513 | 0,533968 |                          |
| TC0700001795.mm.1 | 2,43  | D430042O09Rik | PSR0700015288.mm.1 | -4,44 | 0,006014 | 0,386586 | Cassette Exon 0,5        |
| TC0700001795.mm.1 | 2,43  | D430042O09Rik | PSR0700015277.mm.1 | -4,71 | 0,004718 | 0,370888 | Cassette Exon 0,46       |
| TC0700001795.mm.1 | 2,43  | D430042O09Rik | PSR0700015289.mm.1 | -5,09 | 0,033311 | 0,522389 | Cassette Exon 0,51       |
| TC0700001795.mm.1 | 2,43  | D430042O09Rik | JUC0700008009.mm.1 | -5,93 | 0,010603 | 0,422777 |                          |
| TC1100004164.mm.1 | 1,9   | Rbfox3        | JUC1100020824.mm.1 | 3,25  | 0,034882 | 0,526858 |                          |
| TC1100004164.mm.1 | 1,9   | Rbfox3        | PSR1100039623.mm.1 | -2,01 | 0,028404 | 0,507085 | Cassette Exon 0,16       |
| TC1100004164.mm.1 | 1,9   | Rbfox3        | PSR1100039615.mm.1 | -2,2  | 0,008817 | 0,410077 | Cassette Exon 0,12       |
| TC1100004164.mm.1 | 1,9   | Rbfox3        | JUC1100020825.mm.1 | -2,23 | 0,004475 | 0,367858 |                          |
| TC1100004164.mm.1 | 1,9   | Rbfox3        | JUC1100020840.mm.1 | -2,58 | 0,008757 | 0,409704 |                          |
| TC1100004164.mm.1 | 1,9   | Rbfox3        | PSR1100039630.mm.1 | -2,73 | 0,016428 | 0,459007 | Cassette Exon 0,18       |
| TC1100004164.mm.1 | 1,9   | Rbfox3        | PSR1100039627.mm.1 | -2,76 | 0,016795 | 0,460623 | Cassette Exon 0,16       |
| TC1100004164.mm.1 | 1,9   | Rbfox3        | JUC1100020816.mm.1 | -2,92 | 0,018797 | 0,4708   |                          |
| TC1700001215.mm.1 | -1,02 | Arhgef33      | JUC1700006220.mm.1 | 3,25  | 0,011898 | 0,431468 |                          |
| TC1700001215.mm.1 | -1,02 | Arhgef33      | PSR1700011386.mm.1 | 2,16  | 0,003768 | 0,357586 | Cassette Exon 0,12       |

|                   |                     |                    |        |          |                              |      |
|-------------------|---------------------|--------------------|--------|----------|------------------------------|------|
| TC1300000765.mm.1 | 1,29                | JUC1300002658.mm.1 | 3,25   | 0,027283 | 0,503732                     |      |
| TC1000001275.mm.1 | -1,37               | JUC1000005173.mm.1 | 3,25   | 0,010437 | 0,421595                     |      |
| TC1000000413.mm.1 | -1,21 Atg5          | JUC1000001532.mm.1 | 3,25   | 0,048448 | 0,560744                     |      |
| TC0Y00000024.mm.1 | -1,35 Gm20824       | JUC0Y00000174.mm.1 | 3,25   | 0,01742  | 0,463792                     |      |
| TC0300002207.mm.1 | 8,59 Gria2; Gm25749 | JUC0300008717.mm.1 | 3,24   | 0,000251 | 0,28803                      |      |
| TC0300002207.mm.1 | 8,59 Gria2; Gm25749 | PSR0300016586.mm.1 | -2,42  | 0,003276 | 0,354243 Cassette Exon       | 0,28 |
| TC0300002207.mm.1 | 8,59 Gria2; Gm25749 | PSR0300016581.mm.1 | -2,52  | 0,002219 | 0,345773 Cassette Exon       | 0,21 |
| TC0300002207.mm.1 | 8,59 Gria2; Gm25749 | JUC0300008712.mm.1 | -2,53  | 0,004199 | 0,363134                     |      |
| TC0300002207.mm.1 | 8,59 Gria2; Gm25749 | JUC0300008706.mm.1 | -2,86  | 0,000906 | 0,313363                     |      |
| TC0300002207.mm.1 | 8,59 Gria2; Gm25749 | PSR0300016582.mm.1 | -3,06  | 0,003268 | 0,354243 Cassette Exon       | 0,28 |
| TC0300002207.mm.1 | 8,59 Gria2; Gm25749 | JUC0300008715.mm.1 | -3,28  | 0,016905 | 0,460797                     |      |
| TC0300002207.mm.1 | 8,59 Gria2; Gm25749 | JUC0300008711.mm.1 | -3,45  | 0,008576 | 0,40821                      |      |
| TC0300002207.mm.1 | 8,59 Gria2; Gm25749 | PSR0300016584.mm.1 | -3,84  | 0,000012 | 0,179072 Intron Retention    | 0,44 |
| TC0300002207.mm.1 | 8,59 Gria2; Gm25749 | JUC0300008713.mm.1 | -3,92  | 0,00001  | 0,179072                     |      |
| TC0300002207.mm.1 | 8,59 Gria2; Gm25749 | PSR0300016592.mm.1 | -4,06  | 0,003416 | 0,355257 Alternative 3' Acce | 0,45 |
| TC0300002207.mm.1 | 8,59 Gria2; Gm25749 | PSR0300016590.mm.1 | -4,31  | 0,001096 | 0,317328 Alternative 3' Acce | 0,45 |
| TC0300002207.mm.1 | 8,59 Gria2; Gm25749 | JUC0300008724.mm.1 | -4,58  | 0,006984 | 0,395722                     |      |
| TC0300002207.mm.1 | 8,59 Gria2; Gm25749 | PSR0300016576.mm.1 | -4,63  | 0,000841 | 0,311886                     |      |
| TC0300002207.mm.1 | 8,59 Gria2; Gm25749 | JUC0300008720.mm.1 | -5,25  | 0,004029 | 0,361636                     |      |
| TC0300002207.mm.1 | 8,59 Gria2; Gm25749 | JUC0300008710.mm.1 | -5,75  | 0,000009 | 0,179072                     |      |
| TC0300002207.mm.1 | 8,59 Gria2; Gm25749 | PSR0300016580.mm.1 | -6,34  | 0,001787 | 0,336311 Cassette Exon       | 0,52 |
| TC0300002207.mm.1 | 8,59 Gria2; Gm25749 | PSR0300016594.mm.1 | -6,48  | 0,000306 | 0,288663 Intron Retention    | 0,68 |
| TC0300002207.mm.1 | 8,59 Gria2; Gm25749 | PSR0300016577.mm.1 | -7,16  | 0,001153 | 0,317344 Cassette Exon       | 0,28 |
| TC0300002207.mm.1 | 8,59 Gria2; Gm25749 | PSR0300016605.mm.1 | -7,29  | 0,001996 | 0,341091 Alternative 5' Donc | 0,53 |
| TC0300002207.mm.1 | 8,59 Gria2; Gm25749 | PSR0300016585.mm.1 | -7,29  | 0,000092 | 0,255472 Intron Retention    | 0,44 |
| TC0300002207.mm.1 | 8,59 Gria2; Gm25749 | PSR0300016589.mm.1 | -8,77  | 0,003425 | 0,355303 Alternative 3' Acce | 0,45 |
| TC0300002207.mm.1 | 8,59 Gria2; Gm25749 | PSR0300016607.mm.1 | -8,81  | 0,000847 | 0,311909 Alternative 5' Donc | 0,43 |
| TC0300002207.mm.1 | 8,59 Gria2; Gm25749 | PSR0300016608.mm.1 | -11,12 | 0,000508 | 0,303579 Alternative 5' Donc | 0,43 |
| TC0300002207.mm.1 | 8,59 Gria2; Gm25749 | JUC0300008723.mm.1 | -46,02 | 0,00016  | 0,272566                     |      |
| TC0300002207.mm.1 | 8,59 Gria2; Gm25749 | JUC0300008721.mm.1 | -49,94 | 0,000311 | 0,288663                     |      |
| TC1200001018.mm.1 | 3,38 Chga           | JUC1200003997.mm.1 | 3,24   | 0,008646 | 0,408463                     |      |
| TC1200001018.mm.1 | 3,38 Chga           | PSR1200007173.mm.1 | -2,57  | 0,044012 | 0,550779 Cassette Exon       | 0,27 |
| TC1200001018.mm.1 | 3,38 Chga           | PSR1200007166.mm.1 | -5,24  | 0,006727 | 0,393343 Alternative 3' Acce | 0,48 |
| TC1200001018.mm.1 | 3,38 Chga           | JUC1200004000.mm.1 | -5,64  | 0,000259 | 0,28803                      |      |
| TC1200001018.mm.1 | 3,38 Chga           | JUC1200004002.mm.1 | -7,59  | 0,005475 | 0,379939                     |      |
| TC0900002366.mm.1 | -1,44 Commd4        | PSR0900019814.mm.1 | 3,24   | 0,027234 | 0,503642 Alternative 3' Acce | 0,31 |
| TC0900000840.mm.1 | 2,8 Ubap1l          | JUC0900003461.mm.1 | 3,24   | 0,020778 | 0,479405                     |      |
| TC0900000840.mm.1 | 2,8 Ubap1l          | PSR0900006412.mm.1 | -2,28  | 0,02863  | 0,50782 Cassette Exon        | 0,18 |
| TC0900000840.mm.1 | 2,8 Ubap1l          | JUC0900003465.mm.1 | -2,37  | 0,016797 | 0,460623                     |      |
| TC0300001206.mm.1 | 3,11 4833424O15Rik  | JUC0300005112.mm.1 | 3,24   | 0,000056 | 0,24627                      |      |
| TC0300001206.mm.1 | 3,11 4833424O15Rik  | JUC0300005115.mm.1 | 2,94   | 0,010005 | 0,418559                     |      |
| TC0300001206.mm.1 | 3,11 4833424O15Rik  | PSR0300009822.mm.1 | -2,43  | 0,033867 | 0,524083 Cassette Exon       | 0,16 |
| TC0300001206.mm.1 | 3,11 4833424O15Rik  | JUC0300005114.mm.1 | -3,03  | 0,006566 | 0,39213                      |      |
| TC0300001206.mm.1 | 3,11 4833424O15Rik  | PSR0300009820.mm.1 | -3,49  | 0,009232 | 0,414336 Alternative 3' Acce | 0,17 |
| TC1200001231.mm.1 | -1,15 Traf3         | JUC1200004741.mm.1 | 3,24   | 0,00107  | 0,31648                      |      |
| TC0100001733.mm.1 | -1,1                | JUC0100008149.mm.1 | 3,24   | 0,01454  | 0,449545                     |      |
| TC0700004141.mm.1 | -1,43 Cyp2r1        | JUC0700018042.mm.1 | 3,24   | 0,004419 | 0,366832                     |      |
| TC0700001660.mm.1 | 1,46 Arntl          | JUC0700007129.mm.1 | 3,24   | 0,032919 | 0,521149                     |      |

|                   |       |         |                    |       |          |          |                          |
|-------------------|-------|---------|--------------------|-------|----------|----------|--------------------------|
| TC0700001660.mm.1 | 1,46  | Arntl   | JUC0700007128.mm.1 | 2,69  | 0,00602  | 0,386586 |                          |
| TC0900003264.mm.1 | 1,35  | Ulk4    | JUC0900015481.mm.1 | 3,24  | 0,001532 | 0,330287 |                          |
| TC0900003264.mm.1 | 1,35  | Ulk4    | JUC0900015491.mm.1 | 2,05  | 0,045274 | 0,553703 |                          |
| TC0900003264.mm.1 | 1,35  | Ulk4    | JUC0900015457.mm.1 | -2,16 | 0,024607 | 0,494523 |                          |
| TC0600001974.mm.1 | 3,19  | Impdh1  | JUC0600008113.mm.1 | 3,23  | 0,000689 | 0,304792 |                          |
| TC0600001974.mm.1 | 3,19  | Impdh1  | JUC0600008096.mm.1 | 3,19  | 0,00037  | 0,291725 |                          |
| TC0600001974.mm.1 | 3,19  | Impdh1  | PSR0600015512.mm.1 | 2,58  | 0,006129 | 0,387368 | Cassette Exon 0,17       |
| TC0600001974.mm.1 | 3,19  | Impdh1  | JUC0600008104.mm.1 | 2,34  | 0,032951 | 0,52122  |                          |
| TC0600001974.mm.1 | 3,19  | Impdh1  | PSR0600015495.mm.1 | 2,33  | 0,007466 | 0,400381 | Cassette Exon 0,32       |
| TC0600001974.mm.1 | 3,19  | Impdh1  | JUC0600008109.mm.1 | 2,3   | 0,002341 | 0,347317 |                          |
| TC0600001974.mm.1 | 3,19  | Impdh1  | PSR0600015493.mm.1 | -2,01 | 0,024777 | 0,495014 | Cassette Exon 0,09       |
| TC0600001974.mm.1 | 3,19  | Impdh1  | PSR0600015507.mm.1 | -2,12 | 0,000056 | 0,24627  |                          |
| TC0600001974.mm.1 | 3,19  | Impdh1  | JUC0600008114.mm.1 | -3,02 | 0,010155 | 0,419579 |                          |
| TC0600001974.mm.1 | 3,19  | Impdh1  | JUC0600008097.mm.1 | -3,85 | 0,000961 | 0,313363 |                          |
| TC0600001974.mm.1 | 3,19  | Impdh1  | PSR0600015517.mm.1 | -4,03 | 0,00315  | 0,353892 | Alternative 5' Donc 0,61 |
| TC0600001974.mm.1 | 3,19  | Impdh1  | PSR0600015509.mm.1 | -4,56 | 0,000684 | 0,304511 | Alternative 3' Acce 0,54 |
| TC0600001974.mm.1 | 3,19  | Impdh1  | JUC0600008111.mm.1 | -4,59 | 0,005011 | 0,373851 |                          |
| TC0600001974.mm.1 | 3,19  | Impdh1  | JUC0600008115.mm.1 | -5,88 | 0,00146  | 0,328595 |                          |
| TC0500002989.mm.1 | -1,3  | Fbrsl1  | JUC0500014439.mm.1 | 3,23  | 0,038359 | 0,536265 |                          |
| TC0500002989.mm.1 | -1,3  | Fbrsl1  | JUC0500014438.mm.1 | 2,63  | 0,025255 | 0,496939 |                          |
| TC0500002989.mm.1 | -1,3  | Fbrsl1  | PSR0500026462.mm.1 | 2,39  | 0,037618 | 0,534161 | Cassette Exon 0,3        |
| TC0500002989.mm.1 | -1,3  | Fbrsl1  | PSR0500026463.mm.1 | 2,25  | 0,046323 | 0,556186 | Cassette Exon 0,25       |
| TC1400000829.mm.1 | 2,65  | Fgf9    | JUC1400003659.mm.1 | 3,23  | 0,003427 | 0,355303 |                          |
| TC1400000829.mm.1 | 2,65  | Fgf9    | PSR1400006801.mm.1 | 2,01  | 0,02137  | 0,481977 | Alternative 5' Donc 0,16 |
| TC1400000829.mm.1 | 2,65  | Fgf9    | PSR1400006798.mm.1 | -3,16 | 0,046426 | 0,556547 | Cassette Exon 0,16       |
| TC1200001233.mm.1 | 1,03  | Amn     | JUC1200004754.mm.1 | 3,23  | 0,028442 | 0,507234 |                          |
| TC0700003027.mm.1 | -1,56 | Syngn4  | JUC0700014676.mm.1 | 3,23  | 0,033316 | 0,522414 |                          |
| TC0700003027.mm.1 | -1,56 | Syngn4  | JUC0700014679.mm.1 | 2,42  | 0,03061  | 0,513498 |                          |
| TC0600000240.mm.1 | -1,01 | Tspan33 | JUC0600000845.mm.1 | 3,23  | 0,039458 | 0,539705 |                          |
| TC1000002543.mm.1 | 1,63  | Celf5   | JUC1000010478.mm.1 | 3,23  | 0,027554 | 0,504437 |                          |
| TC1000002543.mm.1 | 1,63  | Celf5   | JUC1000010489.mm.1 | -2,71 | 0,018605 | 0,469657 |                          |
| TC1000002543.mm.1 | 1,63  | Celf5   | JUC1000010481.mm.1 | -3,77 | 0,000286 | 0,28803  |                          |
| TC1700002724.mm.1 | 3,74  | Nrxn1   | JUC1700013277.mm.1 | 3,22  | 0,021507 | 0,482741 |                          |
| TC1700002724.mm.1 | 3,74  | Nrxn1   | PSR1700024602.mm.1 | 2,75  | 0,001276 | 0,322251 | Alternative 3' Acce 0,15 |
| TC1700002724.mm.1 | 3,74  | Nrxn1   | JUC1700013258.mm.1 | 2,64  | 0,008569 | 0,40821  |                          |
| TC1700002724.mm.1 | 3,74  | Nrxn1   | PSR1700024582.mm.1 | -2,07 | 0,048671 | 0,561341 | Cassette Exon 0,36       |
| TC1700002724.mm.1 | 3,74  | Nrxn1   | PSR1700024567.mm.1 | -2,24 | 0,040997 | 0,5436   | Cassette Exon 0,32       |
| TC1700002724.mm.1 | 3,74  | Nrxn1   | PSR1700024572.mm.1 | -2,24 | 0,032556 | 0,520128 | Cassette Exon 0,32       |
| TC1700002724.mm.1 | 3,74  | Nrxn1   | PSR1700024580.mm.1 | -2,3  | 0,037386 | 0,533689 | Cassette Exon 0,32       |
| TC1700002724.mm.1 | 3,74  | Nrxn1   | PSR1700024566.mm.1 | -2,32 | 0,00818  | 0,40568  | Cassette Exon 0,32       |
| TC1700002724.mm.1 | 3,74  | Nrxn1   | PSR1700024619.mm.1 | -2,44 | 0,013144 | 0,440196 | Alternative 3' Acce 0,15 |
| TC1700002724.mm.1 | 3,74  | Nrxn1   | JUC1700013275.mm.1 | -2,58 | 0,005211 | 0,377078 |                          |
| TC1700002724.mm.1 | 3,74  | Nrxn1   | PSR1700024606.mm.1 | -2,66 | 0,026684 | 0,502057 | Alternative 3' Acce 0,25 |
| TC1700002724.mm.1 | 3,74  | Nrxn1   | PSR1700024579.mm.1 | -2,68 | 0,011252 | 0,426718 | Cassette Exon 0,32       |
| TC1700002724.mm.1 | 3,74  | Nrxn1   | PSR1700024630.mm.1 | -2,72 | 0,008274 | 0,405976 | Alternative 3' Acce 0,35 |
| TC1700002724.mm.1 | 3,74  | Nrxn1   | JUC1700013282.mm.1 | -2,84 | 0,00143  | 0,327447 |                          |
| TC1700002724.mm.1 | 3,74  | Nrxn1   | JUC1700013271.mm.1 | -2,89 | 0,00246  | 0,349135 |                          |
| TC1700002724.mm.1 | 3,74  | Nrxn1   | PSR1700024586.mm.1 | -2,95 | 0,006111 | 0,387239 | Cassette Exon 0,31       |

|                   |             |                    |       |          |                              |      |
|-------------------|-------------|--------------------|-------|----------|------------------------------|------|
| TC1700002724.mm.1 | 3,74 Nrxn1  | PSR1700024593.mm.1 | -3,08 | 0,007582 | 0,40171 Cassette Exon        | 0,33 |
| TC1700002724.mm.1 | 3,74 Nrxn1  | PSR1700024631.mm.1 | -3,14 | 0,003095 | 0,353892 Alternative 3' Acce | 0,35 |
| TC1700002724.mm.1 | 3,74 Nrxn1  | PSR1700024608.mm.1 | -3,19 | 0,001751 | 0,335996 Alternative 5' Donc | 0,35 |
| TC1700002724.mm.1 | 3,74 Nrxn1  | PSR1700024573.mm.1 | -3,43 | 0,002695 | 0,349612 Cassette Exon       | 0,32 |
| TC1700002724.mm.1 | 3,74 Nrxn1  | JUC1700013254.mm.1 | -3,53 | 0,005139 | 0,376442                     |      |
| TC1700002724.mm.1 | 3,74 Nrxn1  | PSR1700024585.mm.1 | -3,77 | 0,00387  | 0,358872 Cassette Exon       | 0,17 |
| TC1700002724.mm.1 | 3,74 Nrxn1  | PSR1700024594.mm.1 | -3,79 | 0,010136 | 0,419217 Cassette Exon       | 0,5  |
| TC1700002724.mm.1 | 3,74 Nrxn1  | JUC1700013288.mm.1 | -3,82 | 0,001469 | 0,329052                     |      |
| TC1700002724.mm.1 | 3,74 Nrxn1  | JUC1700013280.mm.1 | -3,86 | 0,012434 | 0,43528                      |      |
| TC1700002724.mm.1 | 3,74 Nrxn1  | PSR1700024569.mm.1 | -4,03 | 0,005311 | 0,378059 Cassette Exon       | 0,32 |
| TC1700002724.mm.1 | 3,74 Nrxn1  | PSR1700024568.mm.1 | -4,54 | 0,024716 | 0,494838 Cassette Exon       | 0,32 |
| TC1700002724.mm.1 | 3,74 Nrxn1  | PSR1700024587.mm.1 | -4,61 | 0,013262 | 0,441524 Cassette Exon       | 0,35 |
| TC1700002724.mm.1 | 3,74 Nrxn1  | JUC1700013259.mm.1 | -4,76 | 0,002845 | 0,352207                     |      |
| TC1700002724.mm.1 | 3,74 Nrxn1  | PSR1700024632.mm.1 | -4,94 | 0,004524 | 0,368648 Alternative 3' Acce | 0,35 |
| TC1700002724.mm.1 | 3,74 Nrxn1  | PSR1700024565.mm.1 | -5,08 | 0,007616 | 0,401872 Cassette Exon       | 0,32 |
| TC1700002724.mm.1 | 3,74 Nrxn1  | PSR1700024596.mm.1 | -5,11 | 0,002818 | 0,352207 Cassette Exon       | 0,39 |
| TC1700002724.mm.1 | 3,74 Nrxn1  | PSR1700024589.mm.1 | -5,24 | 0,005609 | 0,381115 Alternative 3' Acce | 0,33 |
| TC1700002724.mm.1 | 3,74 Nrxn1  | JUC1700013285.mm.1 | -5,8  | 0,005896 | 0,383835                     |      |
| TC1700002724.mm.1 | 3,74 Nrxn1  | JUC1700013253.mm.1 | -7    | 0,003992 | 0,360753                     |      |
| TC0300003122.mm.1 | 1,51 Lphn2  | PSR0300024526.mm.1 | 3,22  | 0,001033 | 0,316361 Cassette Exon       | 0,01 |
| TC0300003122.mm.1 | 1,51 Lphn2  | JUC0300012871.mm.1 | -2,32 | 0,001267 | 0,322251                     |      |
| TC0300003122.mm.1 | 1,51 Lphn2  | JUC0300012869.mm.1 | -2,42 | 0,011574 | 0,429058                     |      |
| TC0300003122.mm.1 | 1,51 Lphn2  | PSR0300024524.mm.1 | -2,86 | 0,003084 | 0,353892 Cassette Exon       | 0,31 |
| TC0300003122.mm.1 | 1,51 Lphn2  | PSR0300024529.mm.1 | -3,22 | 0,001033 | 0,316361 Cassette Exon       | 0,34 |
| TC0300003122.mm.1 | 1,51 Lphn2  | JUC0300012870.mm.1 | -4,08 | 0,00943  | 0,416081                     |      |
| TC0300003122.mm.1 | 1,51 Lphn2  | JUC0300012868.mm.1 | -7,61 | 0,002787 | 0,351436                     |      |
| TC0X00003278.mm.1 | -1,26 Cdk15 | JUC0X00010350.mm.1 | 3,22  | 0,047653 | 0,558801                     |      |
| TC0X00003278.mm.1 | -1,26 Cdk15 | JUC0X00010358.mm.1 | 2,79  | 0,01809  | 0,46716                      |      |
| TC0X00003278.mm.1 | -1,26 Cdk15 | PSR0X00020508.mm.1 | 2,69  | 0,006867 | 0,394135 Cassette Exon       | 0,3  |
| TC0X00003278.mm.1 | -1,26 Cdk15 | PSR0X00020495.mm.1 | 2,69  | 0,007422 | 0,399901 Cassette Exon       | 0,14 |
| TC0X00003278.mm.1 | -1,26 Cdk15 | PSR0X00020514.mm.1 | 2,65  | 0,008884 | 0,410642 Cassette Exon       | 0,24 |
| TC0X00003278.mm.1 | -1,26 Cdk15 | PSR0X00020511.mm.1 | 2,64  | 0,008288 | 0,406032 Cassette Exon       | 0,17 |
| TC0X00003278.mm.1 | -1,26 Cdk15 | JUC0X00010354.mm.1 | 2,51  | 0,013937 | 0,446202                     |      |
| TC0X00003278.mm.1 | -1,26 Cdk15 | JUC0X00010355.mm.1 | 2,42  | 0,026759 | 0,502096                     |      |
| TC0X00003278.mm.1 | -1,26 Cdk15 | PSR0X00020512.mm.1 | 2,39  | 0,004336 | 0,364898 Cassette Exon       | 0,21 |
| TC0X00003278.mm.1 | -1,26 Cdk15 | PSR0X00020510.mm.1 | 2,27  | 0,011516 | 0,42831 Cassette Exon        | 0,16 |
| TC0X00003278.mm.1 | -1,26 Cdk15 | JUC0X00010357.mm.1 | 2,18  | 0,030887 | 0,514574                     |      |
| TC0X00003278.mm.1 | -1,26 Cdk15 | PSR0X00020515.mm.1 | 2,17  | 0,013912 | 0,445966 Cassette Exon       | 0,19 |
| TC0X00003278.mm.1 | -1,26 Cdk15 | PSR0X00020513.mm.1 | 2,16  | 0,005534 | 0,380557 Cassette Exon       | 0,24 |
| TC0X00003278.mm.1 | -1,26 Cdk15 | PSR0X00020505.mm.1 | 2,1   | 0,003716 | 0,357586 Cassette Exon       | 0,12 |
| TC0X00003278.mm.1 | -1,26 Cdk15 | JUC0X00010351.mm.1 | 2,08  | 0,009624 | 0,417315                     |      |
| TC1400000096.mm.1 | -1,09 Ptprg | JUC1400000490.mm.1 | 3,22  | 0,012486 | 0,435429                     |      |
| TC1400000096.mm.1 | -1,09 Ptprg | JUC1400000479.mm.1 | 2,44  | 0,014313 | 0,448078                     |      |
| TC1400000096.mm.1 | -1,09 Ptprg | PSR1400000769.mm.1 | 2,24  | 0,037866 | 0,534863 Alternative 3' Acce | 0,2  |
| TC1200000765.mm.1 | 1,09 Pcnx   | JUC1200003079.mm.1 | 3,22  | 0,021978 | 0,485125                     |      |
| TC1200000765.mm.1 | 1,09 Pcnx   | PSR1200005378.mm.1 | 2,15  | 0,026505 | 0,50132 Cassette Exon        | 0,11 |
| TC0200005110.mm.1 | -1,34 Svs3b | JUC0200022457.mm.1 | 3,22  | 0,015873 | 0,456526                     |      |
| TC0100002381.mm.1 | -1,73 Clk1  | JUC0100010968.mm.1 | 3,22  | 0,009967 | 0,418446                     |      |



|                   |                                                 |                    |       |          |                              |      |
|-------------------|-------------------------------------------------|--------------------|-------|----------|------------------------------|------|
| TC0600002923.mm.1 | 1,15 Prrt3                                      | JUC0600011647.mm.1 | 3,22  | 0,028061 | 0,505951                     |      |
| TC0700002708.mm.1 | -1,28 Actn4                                     | JUC0700012632.mm.1 | 3,22  | 0,023118 | 0,489756                     |      |
| TC0400000240.mm.1 | -1,03                                           | JUC0400000705.mm.1 | 3,22  | 0,008372 | 0,406495                     |      |
| TC1200001142.mm.1 | 2,42 Rian; AF357355; AF35735 PSR1200008236.mm.1 |                    | 3,21  | 0,020618 | 0,478652 Casette Exon        | 0,27 |
| TC1200001142.mm.1 | 2,42 Rian; AF357355; AF35735 PSR1200008178.mm.1 |                    | 3,11  | 0,000314 | 0,288663 Alternative 3' Acce | 0,07 |
| TC1200001142.mm.1 | 2,42 Rian; AF357355; AF35735 PSR1200008216.mm.1 |                    | 2,76  | 0,006166 | 0,387873                     |      |
| TC1200001142.mm.1 | 2,42 Rian; AF357355; AF35735 JUC1200004504.mm.1 |                    | 2,71  | 0,039742 | 0,540494                     |      |
| TC1200001142.mm.1 | 2,42 Rian; AF357355; AF35735 PSR1200008179.mm.1 |                    | 2,67  | 0,00509  | 0,375607 Casette Exon        | 0,12 |
| TC1200001142.mm.1 | 2,42 Rian; AF357355; AF35735 PSR1200008170.mm.1 |                    | 2,57  | 0,042838 | 0,548097 Casette Exon        | 0,14 |
| TC1200001142.mm.1 | 2,42 Rian; AF357355; AF35735 JUC1200004528.mm.1 |                    | 2,37  | 0,018553 | 0,469453                     |      |
| TC1200001142.mm.1 | 2,42 Rian; AF357355; AF35735 JUC1200004527.mm.1 |                    | 2,32  | 0,005855 | 0,383747                     |      |
| TC1200001142.mm.1 | 2,42 Rian; AF357355; AF35735 PSR1200008237.mm.1 |                    | 2,28  | 0,017446 | 0,463886 Casette Exon        | 0,18 |
| TC1200001142.mm.1 | 2,42 Rian; AF357355; AF35735 PSR1200008217.mm.1 |                    | 2,28  | 0,007868 | 0,403545 Casette Exon        | 0,1  |
| TC1200001142.mm.1 | 2,42 Rian; AF357355; AF35735 PSR1200008165.mm.1 |                    | -2,02 | 0,036519 | 0,531352 Alternative 3' Acce | 0,17 |
| TC1200001142.mm.1 | 2,42 Rian; AF357355; AF35735 PSR1200008227.mm.1 |                    | -2,16 | 0,042771 | 0,548097 Intron Retention    | 0,17 |
| TC1200001142.mm.1 | 2,42 Rian; AF357355; AF35735 PSR1200008230.mm.1 |                    | -2,24 | 0,00036  | 0,290838                     |      |
| TC1200001142.mm.1 | 2,42 Rian; AF357355; AF35735 PSR1200008244.mm.1 |                    | -2,29 | 0,018088 | 0,46716 Alternative 3' Acce  | 0,21 |
| TC1200001142.mm.1 | 2,42 Rian; AF357355; AF35735 JUC1200004505.mm.1 |                    | -2,37 | 0,006041 | 0,386586                     |      |
| TC1200001142.mm.1 | 2,42 Rian; AF357355; AF35735 PSR1200008176.mm.1 |                    | -2,71 | 0,00357  | 0,356223 Casette Exon        | 0,16 |
| TC1200001142.mm.1 | 2,42 Rian; AF357355; AF35735 JUC1200004535.mm.1 |                    | -2,82 | 0,023544 | 0,490947                     |      |
| TC1200001142.mm.1 | 2,42 Rian; AF357355; AF35735 JUC1200004542.mm.1 |                    | -2,91 | 0,018006 | 0,466939                     |      |
| TC1200001142.mm.1 | 2,42 Rian; AF357355; AF35735 JUC1200004509.mm.1 |                    | -3,02 | 0,015591 | 0,454982                     |      |
| TC1200001142.mm.1 | 2,42 Rian; AF357355; AF35735 PSR1200008218.mm.1 |                    | -3,16 | 0,00064  | 0,304044 Intron Retention    | 0,37 |
| TC1200001142.mm.1 | 2,42 Rian; AF357355; AF35735 PSR1200008200.mm.1 |                    | -3,28 | 0,02224  | 0,485896                     |      |
| TC1200001142.mm.1 | 2,42 Rian; AF357355; AF35735 PSR1200008145.mm.1 |                    | -3,29 | 0,011497 | 0,428152 Alternative 3' Acce | 0,05 |
| TC1200001142.mm.1 | 2,42 Rian; AF357355; AF35735 PSR1200008152.mm.1 |                    | -3,56 | 0,000052 | 0,24627 Casette Exon         | 0,18 |
| TC1200001142.mm.1 | 2,42 Rian; AF357355; AF35735 JUC1200004513.mm.1 |                    | -4,24 | 0,013597 | 0,443703                     |      |
| TC1800000266.mm.1 | 1,31 Camk4                                      | PSR1800001950.mm.1 | 3,21  | 0,00002  | 0,211693 Casette Exon        | 0,2  |
| TC1800000266.mm.1 | 1,31 Camk4                                      | JUC1800001160.mm.1 | 2,44  | 0,008496 | 0,407077                     |      |
| TC0Y00000212.mm.1 | -1,35 Gm21477; Gm21627; Gm2                     | JUC0Y00000851.mm.1 | 3,21  | 0,012333 | 0,434392                     |      |
| TC0Y00000212.mm.1 | -1,35 Gm21477; Gm21627; Gm2                     | PSR0Y00001166.mm.1 | -2,46 | 0,023841 | 0,491997 Casette Exon        | 0,13 |
| TC0Y00000319.mm.1 | -1,35 Gm20896; Gm21627; Gm2                     | JUC0Y00001484.mm.1 | 3,21  | 0,012333 | 0,434392                     |      |
| TC0Y00000319.mm.1 | -1,35 Gm20896; Gm21627; Gm2                     | PSR0Y00001948.mm.1 | -2,46 | 0,023841 | 0,491997 Casette Exon        | 0,13 |
| TC0100000302.mm.1 | -1,17 Slc9a2                                    | JUC0100001288.mm.1 | 3,21  | 0,002603 | 0,349501                     |      |
| TC0100000302.mm.1 | -1,17 Slc9a2                                    | PSR0100002274.mm.1 | 2,19  | 0,022761 | 0,487938 Casette Exon        | 0,11 |
| TC0200003103.mm.1 | -1,03 Mastl                                     | JUC0200012809.mm.1 | 3,21  | 0,047334 | 0,558291                     |      |
| TC0100001031.mm.1 | -1,59 Serpinb8                                  | JUC0100004945.mm.1 | 3,21  | 0,036674 | 0,531675                     |      |
| TC0100000307.mm.1 | -1,03                                           | JUC0100001307.mm.1 | 3,21  | 0,036386 | 0,530857                     |      |
| TC0700000301.mm.1 | -2,27 Ckm                                       | JUC0700001175.mm.1 | 3,21  | 0,03166  | 0,517405                     |      |
| TC1100002007.mm.1 | 1,04 Rptor                                      | JUC1100010048.mm.1 | 3,21  | 0,0217   | 0,484104                     |      |
| TC1100002007.mm.1 | 1,04 Rptor                                      | JUC1100010081.mm.1 | -3    | 0,021028 | 0,480239                     |      |
| TC0600003060.mm.1 | 4,29 Iqsec3                                     | JUC0600012338.mm.1 | 3,2   | 0,000689 | 0,304792                     |      |
| TC0600003060.mm.1 | 4,29 Iqsec3                                     | PSR0600023661.mm.1 | 2,37  | 0,002175 | 0,344453 Casette Exon        | 0,11 |
| TC0600003060.mm.1 | 4,29 Iqsec3                                     | PSR0600023657.mm.1 | 2,18  | 0,003716 | 0,357586 Casette Exon        | 0,15 |
| TC0600003060.mm.1 | 4,29 Iqsec3                                     | PSR0600023653.mm.1 | -2,23 | 0,01429  | 0,448073 Casette Exon        | 0,12 |
| TC0600003060.mm.1 | 4,29 Iqsec3                                     | JUC0600012334.mm.1 | -3,32 | 0,000041 | 0,24627                      |      |
| TC0600003060.mm.1 | 4,29 Iqsec3                                     | PSR0600023664.mm.1 | -3,82 | 0,005891 | 0,383835 Alternative 3' Acce | 0,34 |
| TC0600003060.mm.1 | 4,29 Iqsec3                                     | PSR0600023655.mm.1 | -4,56 | 0,012897 | 0,438165 Casette Exon        | 0,48 |

|                   |       |                 |                    |       |          |          |                     |      |
|-------------------|-------|-----------------|--------------------|-------|----------|----------|---------------------|------|
| TC0600003060.mm.1 | 4,29  | Iqsec3          | PSR0600023667.mm.1 | -4,59 | 0,0021   | 0,342919 | Cassette Exon       | 0,35 |
| TC0600003060.mm.1 | 4,29  | Iqsec3          | PSR0600023669.mm.1 | -4,7  | 0,003627 | 0,356534 | Cassette Exon       | 0,25 |
| TC0600003060.mm.1 | 4,29  | Iqsec3          | PSR0600023670.mm.1 | -5,31 | 0,00555  | 0,380756 | Cassette Exon       | 0,25 |
| TC0600003060.mm.1 | 4,29  | Iqsec3          | PSR0600023671.mm.1 | -6,15 | 0,002128 | 0,342919 | Cassette Exon       | 0,25 |
| TC0600003060.mm.1 | 4,29  | Iqsec3          | JUC0600012330.mm.1 | -6,5  | 0,006431 | 0,389972 |                     |      |
| TC1000001797.mm.1 | -1,62 | Gm20655         | JUC1000007118.mm.1 | 3,2   | 0,000509 | 0,303579 |                     |      |
| TC1000001797.mm.1 | -1,62 | Gm20655         | PSR1000013058.mm.1 | 3,13  | 0,021051 | 0,480262 | Cassette Exon       | 0,21 |
| TC1000001797.mm.1 | -1,62 | Gm20655         | PSR1000013066.mm.1 | 3,05  | 0,016418 | 0,458966 | Cassette Exon       | 0,29 |
| TC1600001335.mm.1 | 2,65  | A930003A15Rik   | PSR1600011001.mm.1 | 3,2   | 0,007814 | 0,403089 | Cassette Exon       | 0,29 |
| TC1600001335.mm.1 | 2,65  | A930003A15Rik   | PSR1600011007.mm.1 | -3,19 | 0,001365 | 0,32572  | Alternative 5' Donc | 0,25 |
| TC0800002066.mm.1 | -1,02 | Dlc1            | JUC0800008757.mm.1 | 3,2   | 0,025716 | 0,498173 |                     |      |
| TC0800002066.mm.1 | -1,02 | Dlc1            | JUC0800008758.mm.1 | 2,2   | 0,000055 | 0,24627  |                     |      |
| TC0800002066.mm.1 | -1,02 | Dlc1            | JUC0800008756.mm.1 | 2,12  | 0,023992 | 0,492783 |                     |      |
| TC0800002066.mm.1 | -1,02 | Dlc1            | PSR0800016042.mm.1 | 2,02  | 0,014147 | 0,447466 | Cassette Exon       | 0,24 |
| TC0X00001829.mm.1 | -1,66 | Cybb            | JUC0X00005926.mm.1 | 3,2   | 0,022707 | 0,487767 |                     |      |
| TC0X00001829.mm.1 | -1,66 | Cybb            | JUC0X00005919.mm.1 | 2,56  | 0,024018 | 0,492809 |                     |      |
| TC0X00001829.mm.1 | -1,66 | Cybb            | PSR0X00011736.mm.1 | 2,54  | 0,020521 | 0,478264 | Cassette Exon       | 0,24 |
| TC0X00001829.mm.1 | -1,66 | Cybb            | PSR0X00011713.mm.1 | 2,27  | 0,030956 | 0,514654 | Alternative 5' Donc | 0,06 |
| TC0X00001829.mm.1 | -1,66 | Cybb            | PSR0X00011727.mm.1 | -2,06 | 0,014185 | 0,447608 | Cassette Exon       | 0,08 |
| TC0600003337.mm.1 | -2,36 | Arhgdib         | PSR0600026200.mm.1 | 3,2   | 0,009073 | 0,412827 | Cassette Exon       | 0,2  |
| TC0600003337.mm.1 | -2,36 | Arhgdib         | PSR0600026201.mm.1 | 2,63  | 0,011341 | 0,427345 | Cassette Exon       | 0,17 |
| TC0600003337.mm.1 | -2,36 | Arhgdib         | PSR0600026207.mm.1 | 2,4   | 0,039724 | 0,540494 | Cassette Exon       | 0,18 |
| TC0100003743.mm.1 | 1,66  | Mark1           | JUC0100017412.mm.1 | 3,2   | 0,01239  | 0,434939 |                     |      |
| TC0100003743.mm.1 | 1,66  | Mark1           | JUC0100017418.mm.1 | 2,02  | 0,01892  | 0,471305 |                     |      |
| TC0100003743.mm.1 | 1,66  | Mark1           | PSR0100030667.mm.1 | -2,04 | 0,042729 | 0,548097 | Cassette Exon       | 0,09 |
| TC1700000625.mm.1 | -1,55 | H2-Ob           | JUC1700003307.mm.1 | 3,2   | 0,014481 | 0,449332 |                     |      |
| TC0800001349.mm.1 | -1,29 | Cntnap4         | JUC0800006059.mm.1 | 3,2   | 0,003636 | 0,3566   |                     |      |
| TC0800001349.mm.1 | -1,29 | Cntnap4         | JUC0800006066.mm.1 | 2,35  | 0,021586 | 0,483245 |                     |      |
| TC0800001349.mm.1 | -1,29 | Cntnap4         | JUC0800006069.mm.1 | 2,07  | 0,022892 | 0,488524 |                     |      |
| TC0500001719.mm.1 | 1,22  | Slc29a4         | JUC0500008580.mm.1 | 3,2   | 0,036861 | 0,532257 |                     |      |
| TC0500001719.mm.1 | 1,22  | Slc29a4         | JUC0500008578.mm.1 | 2,41  | 0,007235 | 0,39826  |                     |      |
| TC0200002427.mm.1 | 5,04  | Snhg11; Gm25187 | PSR0200019714.mm.1 | 3,19  | 0,004129 | 0,3623   | Alternative 5' Donc | 0,16 |
| TC0200002427.mm.1 | 5,04  | Snhg11; Gm25187 | PSR0200019715.mm.1 | 2,83  | 0,008953 | 0,411469 | Alternative 5' Donc | 0,16 |
| TC0200002427.mm.1 | 5,04  | Snhg11; Gm25187 | PSR0200019716.mm.1 | 2,38  | 0,033948 | 0,524252 | Alternative 5' Donc | 0,16 |
| TC0200002427.mm.1 | 5,04  | Snhg11; Gm25187 | PSR0200019699.mm.1 | 2,04  | 0,002978 | 0,352501 | Cassette Exon       | 0,16 |
| TC0200002427.mm.1 | 5,04  | Snhg11; Gm25187 | PSR0200019708.mm.1 | -2,84 | 0,01873  | 0,470733 | Alternative 5' Donc | 0,27 |
| TC0200002427.mm.1 | 5,04  | Snhg11; Gm25187 | PSR0200019705.mm.1 | -3,16 | 0,027672 | 0,504723 | Alternative 5' Donc | 0,27 |
| TC0200002427.mm.1 | 5,04  | Snhg11; Gm25187 | PSR0200019707.mm.1 | -3,16 | 0,007938 | 0,403819 | Alternative 5' Donc | 0,27 |
| TC0200002427.mm.1 | 5,04  | Snhg11; Gm25187 | PSR0200019700.mm.1 | -3,4  | 0,001264 | 0,322251 | Intron Retention    | 0,6  |
| TC0200002427.mm.1 | 5,04  | Snhg11; Gm25187 | PSR0200019703.mm.1 | -3,42 | 0,000209 | 0,28803  | Intron Retention    | 0,54 |
| TC0200002427.mm.1 | 5,04  | Snhg11; Gm25187 | PSR0200019693.mm.1 | -3,42 | 0,018608 | 0,469665 | Alternative 3' Acce | 0,38 |
| TC1000002316.mm.1 | 7,35  | Zfp365          | PSR1000016542.mm.1 | 3,19  | 0,00809  | 0,405014 | Cassette Exon       | 0,07 |
| TC1000002316.mm.1 | 7,35  | Zfp365          | PSR1000016541.mm.1 | 2,27  | 0,035873 | 0,529376 | Cassette Exon       | 0,12 |
| TC1000002316.mm.1 | 7,35  | Zfp365          | PSR1000016547.mm.1 | -3,98 | 0,030356 | 0,512923 | Cassette Exon       | 0,28 |
| TC1000002316.mm.1 | 7,35  | Zfp365          | JUC1000009049.mm.1 | -5,55 | 0,003716 | 0,357586 |                     |      |
| TC1000002316.mm.1 | 7,35  | Zfp365          | PSR1000016543.mm.1 | -5,79 | 0,001035 | 0,316361 | Alternative 3' Acce | 0,34 |
| TC1000002316.mm.1 | 7,35  | Zfp365          | PSR1000016545.mm.1 | -6,59 | 0,008845 | 0,410308 | Cassette Exon       | 0,38 |
| TC1000002316.mm.1 | 7,35  | Zfp365          | PSR1000016551.mm.1 | -7,58 | 0,006041 | 0,386586 | Cassette Exon       | 0,28 |

|                   |                              |                    |       |          |                              |      |
|-------------------|------------------------------|--------------------|-------|----------|------------------------------|------|
| TC1000002316.mm.1 | 7,35 Zfp365                  | PSR1000016548.mm.1 | -8,31 | 0,003059 | 0,353892 Cassette Exon       | 0,28 |
| TC0800002560.mm.1 | 1,09 Gm26721                 | PSR0800019510.mm.1 | 3,19  | 0,022296 | 0,486095 Alternative 5' Donc | 0,35 |
| TC1800001744.mm.1 | 1,01 Arhgap26                | JUC1800001704.mm.1 | 3,19  | 0,000157 | 0,272178                     |      |
| TC1800001744.mm.1 | 1,01 Arhgap26                | PSR1800003052.mm.1 | 2,81  | 0,007966 | 0,403853 Cassette Exon       | 0,28 |
| TC1800001744.mm.1 | 1,01 Arhgap26                | JUC1800001687.mm.1 | 2,45  | 0,012485 | 0,435429                     |      |
| TC1800001744.mm.1 | 1,01 Arhgap26                | JUC1800001696.mm.1 | 2,44  | 0,005544 | 0,379743                     |      |
| TC1800001744.mm.1 | 1,01 Arhgap26                | PSR1800003055.mm.1 | 2,21  | 0,003509 | 0,355749 Cassette Exon       | 0,11 |
| TC1800001744.mm.1 | 1,01 Arhgap26                | PSR1800003058.mm.1 | 2,17  | 0,00758  | 0,40171 Cassette Exon        | 0,12 |
| TC1800001744.mm.1 | 1,01 Arhgap26                | JUC1800001686.mm.1 | 2,1   | 0,019856 | 0,475698                     |      |
| TC1100002993.mm.1 | 1,71 Dnah9                   | PSR1100027161.mm.1 | 3,19  | 0,001261 | 0,322251 Cassette Exon       | 0,26 |
| TC1100002993.mm.1 | 1,71 Dnah9                   | PSR1100027135.mm.1 | 2,72  | 0,000931 | 0,313363 Cassette Exon       | 0,18 |
| TC1100002993.mm.1 | 1,71 Dnah9                   | PSR1100027158.mm.1 | 2,44  | 0,027405 | 0,503961 Cassette Exon       | 0,17 |
| TC1100002993.mm.1 | 1,71 Dnah9                   | PSR1100027153.mm.1 | -2,14 | 0,025363 | 0,497403 Cassette Exon       | 0,13 |
| TC1100002993.mm.1 | 1,71 Dnah9                   | JUC1100014131.mm.1 | -2,14 | 0,001137 | 0,317344                     |      |
| TC1100002993.mm.1 | 1,71 Dnah9                   | JUC1100014192.mm.1 | -2,33 | 0,012141 | 0,432868                     |      |
| TC1100002993.mm.1 | 1,71 Dnah9                   | PSR1100027151.mm.1 | -2,41 | 0,00204  | 0,341377 Cassette Exon       | 0,19 |
| TC1100002993.mm.1 | 1,71 Dnah9                   | JUC1100014127.mm.1 | -2,46 | 0,022833 | 0,488349                     |      |
| TC1100002993.mm.1 | 1,71 Dnah9                   | PSR1100027096.mm.1 | -2,5  | 0,003233 | 0,354243 Cassette Exon       | 0,2  |
| TC1100002993.mm.1 | 1,71 Dnah9                   | PSR1100027152.mm.1 | -2,54 | 0,021792 | 0,484434 Cassette Exon       | 0,17 |
| TC1100002993.mm.1 | 1,71 Dnah9                   | PSR1100027095.mm.1 | -2,65 | 0,002926 | 0,352289 Cassette Exon       | 0,23 |
| TC0200003245.mm.1 | 2,22 Ntng2; 6530402F18Rik    | PSR0200027399.mm.1 | 3,19  | 0,012184 | 0,433072 Alternative 5' Donc | 0,23 |
| TC0200003245.mm.1 | 2,22 Ntng2; 6530402F18Rik    | PSR0200027398.mm.1 | 2,59  | 0,046299 | 0,556186 Alternative 5' Donc | 0,23 |
| TC0200003245.mm.1 | 2,22 Ntng2; 6530402F18Rik    | PSR0200027391.mm.1 | 2,41  | 0,000723 | 0,306174 Alternative 3' Acce | 0,13 |
| TC0200003245.mm.1 | 2,22 Ntng2; 6530402F18Rik    | PSR0200027403.mm.1 | 2,27  | 0,002893 | 0,352207 Alternative 5' Donc | 0,2  |
| TC0200003245.mm.1 | 2,22 Ntng2; 6530402F18Rik    | PSR0200027393.mm.1 | 2,23  | 0,016973 | 0,461419 Alternative 3' Acce | 0,13 |
| TC0200003245.mm.1 | 2,22 Ntng2; 6530402F18Rik    | PSR0200027400.mm.1 | 2,02  | 0,006961 | 0,395722 Alternative 5' Donc | 0,2  |
| TC0200003245.mm.1 | 2,22 Ntng2; 6530402F18Rik    | PSR0200027378.mm.1 | -2,15 | 0,033649 | 0,523479 Alternative 3' Acce | 0,12 |
| TC0200003245.mm.1 | 2,22 Ntng2; 6530402F18Rik    | PSR0200027389.mm.1 | -2,75 | 0,013397 | 0,442454 Cassette Exon       | 0,25 |
| TC0200003245.mm.1 | 2,22 Ntng2; 6530402F18Rik    | PSR0200027375.mm.1 | -2,86 | 0,037758 | 0,534682 Alternative 3' Acce | 0,1  |
| TC0200003245.mm.1 | 2,22 Ntng2; 6530402F18Rik    | JUC0200013852.mm.1 | -2,92 | 0,011629 | 0,429746                     |      |
| TC0200003245.mm.1 | 2,22 Ntng2; 6530402F18Rik    | JUC0200013847.mm.1 | -3,16 | 0,012919 | 0,438344                     |      |
| TC0200003245.mm.1 | 2,22 Ntng2; 6530402F18Rik    | JUC0200013855.mm.1 | -3,57 | 0,005337 | 0,378059                     |      |
| TC1500000139.mm.1 | 3,73 Cdh12                   | JUC1500000681.mm.1 | 3,19  | 0,000406 | 0,297771                     |      |
| TC1500000139.mm.1 | 3,73 Cdh12                   | PSR1500001154.mm.1 | 2,23  | 0,007692 | 0,402552 Cassette Exon       | 0,14 |
| TC1500000139.mm.1 | 3,73 Cdh12                   | JUC1500000682.mm.1 | 2,06  | 0,024112 | 0,49322                      |      |
| TC1500000139.mm.1 | 3,73 Cdh12                   | PSR1500001145.mm.1 | -2,03 | 0,006891 | 0,394558 Cassette Exon       | 0,17 |
| TC1500000139.mm.1 | 3,73 Cdh12                   | PSR1500001155.mm.1 | -2,21 | 0,009804 | 0,417839 Cassette Exon       | 0,13 |
| TC1500000139.mm.1 | 3,73 Cdh12                   | JUC1500000674.mm.1 | -2,56 | 0,001218 | 0,322251                     |      |
| TC1500000139.mm.1 | 3,73 Cdh12                   | JUC1500000675.mm.1 | -6,59 | 0,000491 | 0,298999                     |      |
| TC0700000896.mm.1 | -1,16 Nav2; Gm2788; LOC54596 | JUC0700004051.mm.1 | 3,19  | 0,021103 | 0,480467                     |      |
| TC0700000896.mm.1 | -1,16 Nav2; Gm2788; LOC54596 | PSR0700008015.mm.1 | -2,38 | 0,009973 | 0,418446 Alternative 5' Donc | 0,16 |
| TC0200002359.mm.1 | 1,26 Itch                    | JUC0200009498.mm.1 | 3,19  | 0,001238 | 0,322251                     |      |
| TC0200002359.mm.1 | 1,26 Itch                    | JUC0200009515.mm.1 | -2,06 | 0,006162 | 0,387873                     |      |
| TC0200002359.mm.1 | 1,26 Itch                    | PSR0200018773.mm.1 | -2,13 | 0,002489 | 0,349135 Alternative 3' Acce | 0,14 |
| TC0200002359.mm.1 | 1,26 Itch                    | JUC0200009517.mm.1 | -2,37 | 0,027359 | 0,503858                     |      |
| TC0200000872.mm.1 | -1,07 Galnt5                 | JUC0200003573.mm.1 | 3,19  | 0,045054 | 0,553098                     |      |
| TC1000001704.mm.1 | -1,09 Tab2                   | JUC1000006759.mm.1 | 3,19  | 0,022877 | 0,488524                     |      |
| TC0700003361.mm.1 | 1,65 A230006K03Rik           | PSR0700028769.mm.1 | 3,18  | 0,014494 | 0,449491 Cassette Exon       | 0,29 |

|                   |                           |                    |       |          |                              |      |
|-------------------|---------------------------|--------------------|-------|----------|------------------------------|------|
| TC0700003361.mm.1 | 1,65 A230006K03Rik        | PSR0700028804.mm.1 | 2,07  | 0,011404 | 0,427549 Mutually Exclusive  | 0,2  |
| TC0700003361.mm.1 | 1,65 A230006K03Rik        | PSR0700028796.mm.1 | 2,07  | 0,011404 | 0,427549 Mutually Exclusive  | 0,18 |
| TC0700003361.mm.1 | 1,65 A230006K03Rik        | PSR0700028795.mm.1 | 2,04  | 0,043973 | 0,550752 Cassette Exon       | 0,11 |
| TC0700003361.mm.1 | 1,65 A230006K03Rik        | PSR0700028797.mm.1 | -2,07 | 0,011404 | 0,427549 Mutually Exclusive  | 0,18 |
| TC0700003361.mm.1 | 1,65 A230006K03Rik        | JUC0700015234.mm.1 | -2,08 | 0,000154 | 0,272178                     |      |
| TC0700003361.mm.1 | 1,65 A230006K03Rik        | JUC0700015209.mm.1 | -2,13 | 0,009736 | 0,417839                     |      |
| TC0700003361.mm.1 | 1,65 A230006K03Rik        | JUC0700015231.mm.1 | -2,24 | 0,004888 | 0,372195                     |      |
| TC0700003361.mm.1 | 1,65 A230006K03Rik        | JUC0700015219.mm.1 | -2,27 | 0,00944  | 0,416119                     |      |
| TC0700003361.mm.1 | 1,65 A230006K03Rik        | PSR0700028793.mm.1 | -2,33 | 0,004471 | 0,367776 Alternative 3' Acce | 0,15 |
| TC0700003361.mm.1 | 1,65 A230006K03Rik        | PSR0700028771.mm.1 | -2,4  | 0,009847 | 0,417839 Cassette Exon       | 0,13 |
| TC0700003361.mm.1 | 1,65 A230006K03Rik        | JUC0700015205.mm.1 | -2,5  | 0,029329 | 0,509981                     |      |
| TC0700003361.mm.1 | 1,65 A230006K03Rik        | JUC0700015233.mm.1 | -2,87 | 0,009333 | 0,414973                     |      |
| TC0700003361.mm.1 | 1,65 A230006K03Rik        | JUC0700015226.mm.1 | -3,03 | 0,003933 | 0,359818                     |      |
| TC0700003361.mm.1 | 1,65 A230006K03Rik        | PSR0700028805.mm.1 | -3,05 | 0,00029  | 0,288663 Mutually Exclusive  | 0,2  |
| TC0700003361.mm.1 | 1,65 A230006K03Rik        | JUC0700015235.mm.1 | -3,29 | 0,005669 | 0,381983                     |      |
| TC0700003361.mm.1 | 1,65 A230006K03Rik        | JUC0700015215.mm.1 | -4,11 | 0,047852 | 0,559373                     |      |
| TC1200000641.mm.1 | -1,04 Slc38a6             | JUC1200002466.mm.1 | 3,18  | 0,00964  | 0,417354                     |      |
| TC1200000641.mm.1 | -1,04 Slc38a6             | JUC1200002480.mm.1 | 2,72  | 0,01037  | 0,421259                     |      |
| TC1200000641.mm.1 | -1,04 Slc38a6             | JUC1200002467.mm.1 | 2,49  | 0,018984 | 0,471445                     |      |
| TC1200000641.mm.1 | -1,04 Slc38a6             | JUC1200002477.mm.1 | 2,22  | 0,033728 | 0,523549                     |      |
| TC1200000641.mm.1 | -1,04 Slc38a6             | PSR1200004410.mm.1 | 2,03  | 0,028317 | 0,506741 Cassette Exon       | 0,27 |
| TC1200000641.mm.1 | -1,04 Slc38a6             | JUC1200002469.mm.1 | -3,48 | 0,01459  | 0,449914                     |      |
| TC0400002460.mm.1 | 1,33 Ubap2; Gm23090       | PSR0400019865.mm.1 | 3,18  | 0,02899  | 0,508842 Cassette Exon       | 0,23 |
| TC1900001128.mm.1 | -1,33 Ms4a1               | JUC1900005800.mm.1 | 3,18  | 0,001046 | 0,316361                     |      |
| TC1900001590.mm.1 | 1,4 Kcnp2                 | JUC1900007803.mm.1 | 3,18  | 0,034518 | 0,525929                     |      |
| TC0100000697.mm.1 | -1,03 Nyap2               | JUC0100003403.mm.1 | 3,18  | 0,001716 | 0,335996                     |      |
| TC0700000908.mm.1 | 1,09 Nell1                | JUC0700004109.mm.1 | 3,18  | 0,018409 | 0,468484                     |      |
| TC0600002209.mm.1 | -1,3                      | JUC0600009121.mm.1 | 3,18  | 0,044951 | 0,552878                     |      |
| TC0700002168.mm.1 | -1,16 Tmem150b            | JUC0700010534.mm.1 | 3,18  | 0,005982 | 0,386153                     |      |
| TC0X00001390.mm.1 | -1,4 Atg4a                | JUC0X00004312.mm.1 | 3,18  | 0,021101 | 0,480439                     |      |
| TC0X00001390.mm.1 | -1,4 Atg4a                | JUC0X00004323.mm.1 | 2,14  | 0,003343 | 0,354243                     |      |
| TC0400002362.mm.1 | -1,41 Bach2os; BC024582   | JUC0400010010.mm.1 | 3,18  | 0,002887 | 0,352207                     |      |
| TC0300001493.mm.1 | -1,59 Gng5; Gm15776       | PSR0300012103.mm.1 | 3,17  | 0,026859 | 0,502454 Intron Retention    | 0,54 |
| TC0100000222.mm.1 | -1,26 Imp4                | PSR0100001425.mm.1 | 3,17  | 0,036871 | 0,532257 Alternative 5' Donc | 0,35 |
| TC1400002648.mm.1 | 1,18 Pou4f1; RP24-312G4.2 | PSR1400019812.mm.1 | 3,17  | 0,025705 | 0,498173 Alternative 3' Acce | 0,19 |
| TC1400002648.mm.1 | 1,18 Pou4f1; RP24-312G4.2 | JUC1400010907.mm.1 | -2,44 | 0,008352 | 0,406435                     |      |
| TC0300002497.mm.1 | 1,22 Bola1                | JUC0300010154.mm.1 | 3,17  | 0,031754 | 0,517489                     |      |
| TC0300002497.mm.1 | 1,22 Bola1                | PSR0300019506.mm.1 | -2,23 | 0,014452 | 0,44909 Cassette Exon        | 0,14 |
| TC0100002193.mm.1 | -1,46 Tmem131             | JUC0100010027.mm.1 | 3,17  | 0,014748 | 0,450662                     |      |
| TC0900003338.mm.1 | 1,43 Dync2h1              | JUC0900008095.mm.1 | 3,17  | 0,017566 | 0,464258                     |      |
| TC0900003338.mm.1 | 1,43 Dync2h1              | JUC0900008161.mm.1 | -3,16 | 0,022917 | 0,488524                     |      |
| TC0900003338.mm.1 | 1,43 Dync2h1              | JUC0900008135.mm.1 | -3,57 | 0,000716 | 0,306015                     |      |
| TC0900003338.mm.1 | 1,43 Dync2h1              | JUC0900008134.mm.1 | -3,67 | 0,041435 | 0,544646                     |      |
| TC0900000544.mm.1 | 1,25 Bace1                | JUC0900001974.mm.1 | 3,17  | 0,036185 | 0,529982                     |      |
| TC0700002888.mm.1 | -1,07 Gm6124              | JUC0700013773.mm.1 | 3,17  | 0,046743 | 0,556856                     |      |
| TC1200001109.mm.1 | 1,99 Eml1                 | JUC1200004404.mm.1 | 3,16  | 0,043956 | 0,550745                     |      |
| TC1200001109.mm.1 | 1,99 Eml1                 | PSR1200007876.mm.1 | -2,32 | 0,011954 | 0,431862 Alternative 3' Acce | 0,13 |
| TC1200001109.mm.1 | 1,99 Eml1                 | PSR1200007897.mm.1 | -2,43 | 0,037754 | 0,534682 Alternative 5' Donc | 0,24 |

|                   |                               |                    |       |          |                              |      |
|-------------------|-------------------------------|--------------------|-------|----------|------------------------------|------|
| TC1200001109.mm.1 | 1,99 Eml1                     | PSR1200007868.mm.1 | -2,67 | 0,005689 | 0,382387 Alternative 3' Acce | 0,12 |
| TC1200001109.mm.1 | 1,99 Eml1                     | PSR1200007874.mm.1 | -2,8  | 0,01329  | 0,441719 Alternative 3' Acce | 0,17 |
| TC1200001109.mm.1 | 1,99 Eml1                     | JUC1200004425.mm.1 | -3,19 | 0,01328  | 0,441719                     |      |
| TC1200001109.mm.1 | 1,99 Eml1                     | JUC1200004406.mm.1 | -4,41 | 0,018408 | 0,468484                     |      |
| TC0500000652.mm.1 | 1,08 C330024D21Rik            | PSR0500005785.mm.1 | 3,16  | 0,041283 | 0,544166 Mutually Exclusive  | 0,21 |
| TC0500000652.mm.1 | 1,08 C330024D21Rik            | PSR0500005784.mm.1 | -2,15 | 0,012574 | 0,435847 Mutually Exclusive  | 0,21 |
| TC0700002502.mm.1 | -2,9 Cblc                     | JUC0700011812.mm.1 | 3,16  | 0,037372 | 0,533674                     |      |
| TC0700002502.mm.1 | -2,9 Cblc                     | PSR0700022126.mm.1 | 2,48  | 0,007904 | 0,403819 Cassette Exon       | 0,14 |
| TC0700002502.mm.1 | -2,9 Cblc                     | PSR0700022148.mm.1 | 2,48  | 0,049892 | 0,563773 Cassette Exon       | 0,14 |
| TC1400001475.mm.1 | -1,18                         | JUC1400005974.mm.1 | 3,16  | 0,03085  | 0,514341                     |      |
| TC1700001940.mm.1 | -1,12 Msh5                    | JUC1700009837.mm.1 | 3,16  | 0,003725 | 0,357586                     |      |
| TC0100000678.mm.1 | 1,96 Sgpp2                    | JUC0100003351.mm.1 | 3,16  | 0,037514 | 0,533968                     |      |
| TC0200001985.mm.1 | 1,15 Ptpra                    | JUC0200007924.mm.1 | 3,16  | 0,014463 | 0,44909                      |      |
| TC0600001481.mm.1 | 1,32 Parp11                   | JUC0600006449.mm.1 | 3,16  | 0,028944 | 0,50876                      |      |
| TC1100000316.mm.1 | -1,06 Asb3                    | JUC1100001442.mm.1 | 3,16  | 0,034751 | 0,526574                     |      |
| TC0Y00000322.mm.1 | -1,22 Gm20897                 | JUC0Y00001510.mm.1 | 3,16  | 0,016586 | 0,459685                     |      |
| TC0Y00000151.mm.1 | -1,36 Gm21258; LOC101056210   | JUC0Y00000455.mm.1 | 3,16  | 0,018737 | 0,470733                     |      |
| TC0Y00000176.mm.1 | -1,36 Gm20736; LOC101056210   | JUC0Y00000661.mm.1 | 3,16  | 0,018737 | 0,470733                     |      |
| TC0900002636.mm.1 | -1,04 BC065403; RP24-282D16.5 | PSR0900021890.mm.1 | 3,15  | 0,011719 | 0,429969 Alternative 3' Acce | 0,27 |
| TC0500003730.mm.1 | -2,04 Gbp9                    | PSR0500025580.mm.1 | 3,15  | 0,009339 | 0,415075 Cassette Exon       | 0,25 |
| TC0700003129.mm.1 | 3,4                           | JUC0700015075.mm.1 | 3,15  | 0,010972 | 0,42518                      |      |
| TC0700003129.mm.1 | 3,4                           | PSR0700028296.mm.1 | -3,1  | 0,003863 | 0,358861 Cassette Exon       | 0,16 |
| TC0200004528.mm.1 | -1 Cep152                     | JUC0200019938.mm.1 | 3,15  | 0,027126 | 0,503022                     |      |
| TC0200004528.mm.1 | -1 Cep152                     | JUC0200019935.mm.1 | -2,51 | 0,027891 | 0,505612                     |      |
| TC0800003067.mm.1 | -1,38                         | JUC0800012948.mm.1 | 3,15  | 0,044398 | 0,551445                     |      |
| TC0400000190.mm.1 | -1,02 Fbxl4                   | JUC0400000620.mm.1 | 3,15  | 0,012103 | 0,43255                      |      |
| TC0300000609.mm.1 | 3,75 FstI5                    | PSR0300004024.mm.1 | 3,14  | 0,003665 | 0,357266 Cassette Exon       | 0,16 |
| TC0300000609.mm.1 | 3,75 FstI5                    | JUC0300002101.mm.1 | 2,86  | 0,01438  | 0,448389                     |      |
| TC0300000609.mm.1 | 3,75 FstI5                    | JUC0300002098.mm.1 | 2,78  | 0,018602 | 0,469657                     |      |
| TC0300000609.mm.1 | 3,75 FstI5                    | JUC0300002111.mm.1 | 2,77  | 0,014781 | 0,45081                      |      |
| TC0300000609.mm.1 | 3,75 FstI5                    | PSR0300004020.mm.1 | -2,23 | 0,004542 | 0,368648 Cassette Exon       | 0,18 |
| TC0300000609.mm.1 | 3,75 FstI5                    | PSR0300004027.mm.1 | -2,34 | 0,000606 | 0,304044 Cassette Exon       | 0,12 |
| TC0300000609.mm.1 | 3,75 FstI5                    | PSR0300004035.mm.1 | -2,54 | 0,024151 | 0,493245                     |      |
| TC0300000609.mm.1 | 3,75 FstI5                    | PSR0300004019.mm.1 | -2,93 | 0,010216 | 0,419955 Cassette Exon       | 0,18 |
| TC0300000609.mm.1 | 3,75 FstI5                    | PSR0300004017.mm.1 | -3,54 | 0,006194 | 0,387873 Cassette Exon       | 0,18 |
| TC0300000609.mm.1 | 3,75 FstI5                    | PSR0300004030.mm.1 | -4,02 | 0,000674 | 0,304338 Alternative 3' Acce | 0,45 |
| TC0300000609.mm.1 | 3,75 FstI5                    | JUC0300002114.mm.1 | -4,04 | 0,031129 | 0,51548                      |      |
| TC0300000609.mm.1 | 3,75 FstI5                    | PSR0300004032.mm.1 | -4,07 | 0,004909 | 0,372662 Alternative 5' Donc | 0,47 |
| TC0300000609.mm.1 | 3,75 FstI5                    | JUC0300002113.mm.1 | -4,11 | 0,025882 | 0,498873                     |      |
| TC0300000609.mm.1 | 3,75 FstI5                    | PSR0300004029.mm.1 | -5,05 | 0,003738 | 0,357586 Cassette Exon       | 0,29 |
| TC0300000609.mm.1 | 3,75 FstI5                    | PSR0300004021.mm.1 | -8,75 | 0,000172 | 0,27703 Cassette Exon        | 0,44 |
| TC1100001425.mm.1 | 1,77 Spag9                    | JUC1100006965.mm.1 | 3,14  | 0,036088 | 0,529716                     |      |
| TC1100001425.mm.1 | 1,77 Spag9                    | PSR1100013262.mm.1 | -2,08 | 0,020489 | 0,478019 Intron Retention    | 0,27 |
| TC1100001425.mm.1 | 1,77 Spag9                    | JUC1100006932.mm.1 | -2,08 | 0,044107 | 0,550916                     |      |
| TC1100001425.mm.1 | 1,77 Spag9                    | JUC1100006933.mm.1 | -2,14 | 0,017834 | 0,466084                     |      |
| TC1100001425.mm.1 | 1,77 Spag9                    | PSR1100013278.mm.1 | -2,46 | 0,036021 | 0,529546 Alternative 3' Acce | 0,23 |
| TC1100001425.mm.1 | 1,77 Spag9                    | PSR1100013290.mm.1 | -3,05 | 0,007377 | 0,39943 Alternative 5' Donc  | 0,34 |
| TC0500003483.mm.1 | 3 Prkar1b; Gm15672            | JUC0500017309.mm.1 | 3,14  | 0,019958 | 0,476104                     |      |

|                   |                    |                    |       |          |          |                          |
|-------------------|--------------------|--------------------|-------|----------|----------|--------------------------|
| TC0500003483.mm.1 | 3 Prkar1b; Gm15672 | JUC0500017312.mm.1 | 2,23  | 0,00607  | 0,386691 |                          |
| TC0500003483.mm.1 | 3 Prkar1b; Gm15672 | JUC0500017308.mm.1 | 2,18  | 0,001102 | 0,317328 |                          |
| TC0500003483.mm.1 | 3 Prkar1b; Gm15672 | PSR0500031884.mm.1 | -2,4  | 0,01512  | 0,452652 |                          |
| TC0500003483.mm.1 | 3 Prkar1b; Gm15672 | PSR0500031875.mm.1 | -2,5  | 0,006096 | 0,386954 | Alternative 3' Acce 0,24 |
| TC0500003483.mm.1 | 3 Prkar1b; Gm15672 | PSR0500031894.mm.1 | -2,5  | 0,028743 | 0,508141 | Cassette Exon 0,12       |
| TC0500003483.mm.1 | 3 Prkar1b; Gm15672 | PSR0500031889.mm.1 | -2,54 | 0,011513 | 0,42831  | Cassette Exon 0,07       |
| TC0500003483.mm.1 | 3 Prkar1b; Gm15672 | PSR0500031878.mm.1 | -3,05 | 0,007818 | 0,403089 | Cassette Exon 0,29       |
| TC0500003483.mm.1 | 3 Prkar1b; Gm15672 | PSR0500031881.mm.1 | -3,22 | 0,017837 | 0,466096 | Cassette Exon 0,11       |
| TC0500003483.mm.1 | 3 Prkar1b; Gm15672 | JUC0500017319.mm.1 | -3,32 | 0,02988  | 0,51129  |                          |
| TC0500003483.mm.1 | 3 Prkar1b; Gm15672 | PSR0500031893.mm.1 | -3,6  | 0,008917 | 0,410822 | Cassette Exon 0,3        |
| TC0500003483.mm.1 | 3 Prkar1b; Gm15672 | PSR0500031862.mm.1 | -3,69 | 0,016765 | 0,460504 | Cassette Exon 0,33       |
| TC0500003483.mm.1 | 3 Prkar1b; Gm15672 | JUC0500017324.mm.1 | -4,11 | 0,008046 | 0,40434  |                          |
| TC0500003483.mm.1 | 3 Prkar1b; Gm15672 | PSR0500031895.mm.1 | -4,13 | 0,038206 | 0,535805 | Cassette Exon 0,32       |
| TC0500003483.mm.1 | 3 Prkar1b; Gm15672 | JUC0500017317.mm.1 | -4,15 | 0,012187 | 0,433072 |                          |
| TC0500003483.mm.1 | 3 Prkar1b; Gm15672 | JUC0500017322.mm.1 | -4,25 | 0,009411 | 0,415853 |                          |
| TC0500003483.mm.1 | 3 Prkar1b; Gm15672 | JUC0500017327.mm.1 | -4,26 | 0,016482 | 0,459355 |                          |
| TC0500003483.mm.1 | 3 Prkar1b; Gm15672 | PSR0500031890.mm.1 | -4,28 | 0,015761 | 0,455437 | Cassette Exon 0,21       |
| TC0500003483.mm.1 | 3 Prkar1b; Gm15672 | PSR0500031877.mm.1 | -4,33 | 0,018401 | 0,468484 | Cassette Exon 0,29       |
| TC0500003483.mm.1 | 3 Prkar1b; Gm15672 | PSR0500031892.mm.1 | -4,34 | 0,008859 | 0,410501 | Cassette Exon 0,21       |
| TC0500003483.mm.1 | 3 Prkar1b; Gm15672 | PSR0500031891.mm.1 | -4,63 | 0,008622 | 0,408442 | Cassette Exon 0,21       |
| TC0500003483.mm.1 | 3 Prkar1b; Gm15672 | JUC0500017323.mm.1 | -4,85 | 0,001358 | 0,325659 |                          |
| TC0500003483.mm.1 | 3 Prkar1b; Gm15672 | PSR0500031887.mm.1 | -5,23 | 0,013648 | 0,444323 | Cassette Exon 0,1        |
| TC0400002093.mm.1 | 1,22 Aurkaip1      | PSR0400017465.mm.1 | 3,14  | 0,000236 | 0,28803  | Intron Retention 0,29    |
| TC0700002037.mm.1 | 1,73 B4galnt4      | PSR0700017931.mm.1 | 3,14  | 0,022043 | 0,48529  | Cassette Exon 0,25       |
| TC0700002037.mm.1 | 1,73 B4galnt4      | JUC0700009509.mm.1 | -2,31 | 0,000069 | 0,250992 |                          |
| TC1400001752.mm.1 | 1,37 Nrg3          | PSR1400013641.mm.1 | 3,14  | 0,000661 | 0,304044 | Cassette Exon 0,22       |
| TC1400001752.mm.1 | 1,37 Nrg3          | JUC1400007457.mm.1 | -2,37 | 0,003118 | 0,353892 |                          |
| TC1400001752.mm.1 | 1,37 Nrg3          | PSR1400013636.mm.1 | -2,7  | 0,049559 | 0,563325 | Cassette Exon 0,16       |
| TC1400001752.mm.1 | 1,37 Nrg3          | JUC1400007463.mm.1 | -2,99 | 0,006675 | 0,393187 |                          |
| TC1000003006.mm.1 | -1,09              | JUC1000012307.mm.1 | 3,14  | 0,025195 | 0,49668  |                          |
| TC1000003006.mm.1 | -1,09              | PSR1000022458.mm.1 | 2,28  | 0,021924 | 0,484893 | Cassette Exon 0,14       |
| TC1900000689.mm.1 | -1,4 Nfkb2         | PSR1900006145.mm.1 | 3,14  | 0,048718 | 0,561355 | Alternative 3' Acce 0,02 |
| TC1400002336.mm.1 | 1,01 Slc39a14      | JUC1400010013.mm.1 | 3,14  | 0,004672 | 0,370181 |                          |
| TC1400002336.mm.1 | 1,01 Slc39a14      | JUC1400010018.mm.1 | 3,14  | 0,004672 | 0,370181 |                          |
| TC1400002336.mm.1 | 1,01 Slc39a14      | PSR1400018216.mm.1 | 2,2   | 0,005271 | 0,378059 |                          |
| TC1100003920.mm.1 | -1,22 Cd79b        | JUC1100019186.mm.1 | 3,14  | 0,017825 | 0,465913 |                          |
| TC1100003920.mm.1 | -1,22 Cd79b        | JUC1100019187.mm.1 | -3,13 | 0,019441 | 0,474109 |                          |
| TC0600000533.mm.1 | -1,13              | JUC0600001976.mm.1 | 3,14  | 0,016293 | 0,458465 |                          |
| TC1000000626.mm.1 | 1,1 Jmjd1c         | JUC1000002347.mm.1 | 3,14  | 0,024503 | 0,493992 |                          |
| TC1000000626.mm.1 | 1,1 Jmjd1c         | JUC1000002359.mm.1 | -2,12 | 0,009386 | 0,415457 |                          |
| TC0100002143.mm.1 | 2,24 Bend6         | JUC0100009763.mm.1 | 3,13  | 0,005418 | 0,379167 |                          |
| TC0100002143.mm.1 | 2,24 Bend6         | PSR0100017227.mm.1 | 2,39  | 0,008524 | 0,407684 | Cassette Exon 0,29       |
| TC0100002143.mm.1 | 2,24 Bend6         | PSR0100017225.mm.1 | 2,01  | 0,006552 | 0,39213  | Cassette Exon 0,2        |
| TC0100002143.mm.1 | 2,24 Bend6         | PSR0100017233.mm.1 | -2,7  | 0,004466 | 0,367639 | Alternative 5' Donc 0,2  |
| TC0100002143.mm.1 | 2,24 Bend6         | PSR0100017229.mm.1 | -2,83 | 0,005254 | 0,377869 | Cassette Exon 0,18       |
| TC0100002143.mm.1 | 2,24 Bend6         | PSR0100017235.mm.1 | -3,15 | 0,003256 | 0,354243 | Cassette Exon 0,24       |
| TC0100002143.mm.1 | 2,24 Bend6         | JUC0100009767.mm.1 | -3,21 | 0,008783 | 0,409822 |                          |
| TC0100002143.mm.1 | 2,24 Bend6         | PSR0100017226.mm.1 | -3,41 | 0,022308 | 0,486127 | Alternative 3' Acce 0,45 |

|                   |                              |                    |       |          |                              |      |
|-------------------|------------------------------|--------------------|-------|----------|------------------------------|------|
| TC0100002143.mm.1 | 2,24 Bend6                   | PSR0100017234.mm.1 | -4,4  | 0,001221 | 0,322251 Cassette Exon       | 0,32 |
| TC0400002077.mm.1 | 2,63 Gnb1                    | JUC0400009069.mm.1 | 3,13  | 0,039127 | 0,538487                     |      |
| TC0400002077.mm.1 | 2,63 Gnb1                    | PSR0400017238.mm.1 | 2,74  | 0,019193 | 0,472846 Alternative 5' Donc | 0,28 |
| TC0400002077.mm.1 | 2,63 Gnb1                    | PSR0400017228.mm.1 | -2,19 | 0,013042 | 0,439418 Cassette Exon       | 0,08 |
| TC0400002077.mm.1 | 2,63 Gnb1                    | PSR0400017214.mm.1 | -2,38 | 0,011733 | 0,429969 Cassette Exon       | 0,13 |
| TC0400002077.mm.1 | 2,63 Gnb1                    | PSR0400017227.mm.1 | -2,41 | 0,007895 | 0,403819 Alternative 5' Donc | 0,2  |
| TC1200001192.mm.1 | 1,58 Mirg; Mir134; Mir377; M | PSR1200008345.mm.1 | 3,13  | 0,030638 | 0,513746 Cassette Exon       | 0,2  |
| TC1200001192.mm.1 | 1,58 Mirg; Mir134; Mir377; M | PSR1200008399.mm.1 | 2,06  | 0,008276 | 0,405976                     |      |
| TC1200001192.mm.1 | 1,58 Mirg; Mir134; Mir377; M | PSR1200008328.mm.1 | -2,13 | 0,000949 | 0,313363 Cassette Exon       | 0,13 |
| TC1200001192.mm.1 | 1,58 Mirg; Mir134; Mir377; M | PSR1200008375.mm.1 | -3    | 0,001821 | 0,336896 Cassette Exon       | 0,12 |
| TC0600003064.mm.1 | -1,51 Phc1                   | PSR0600023725.mm.1 | 3,13  | 0,017683 | 0,464956 Cassette Exon       | 0,18 |
| TC1600001758.mm.1 | -1,05 Tbc1d23                | JUC1600007446.mm.1 | 3,13  | 0,030269 | 0,512602                     |      |
| TC1600001758.mm.1 | -1,05 Tbc1d23                | PSR1600014284.mm.1 | 2,57  | 0,03401  | 0,524445 Alternative 5' Donc | 0,14 |
| TC0300000714.mm.1 | -1,41 Iqgap3                 | JUC0300002566.mm.1 | 3,13  | 0,027081 | 0,502997                     |      |
| TC0300000714.mm.1 | -1,41 Iqgap3                 | JUC0300002567.mm.1 | -2,13 | 0,002315 | 0,346468                     |      |
| TC1300000912.mm.1 | -1,62 Ell2                   | JUC1300003130.mm.1 | 3,13  | 0,001959 | 0,340561                     |      |
| TC1700002656.mm.1 | 2,12 Lrpprc                  | JUC1700013001.mm.1 | 3,13  | 0,000163 | 0,272566                     |      |
| TC1700002656.mm.1 | 2,12 Lrpprc                  | JUC1700013009.mm.1 | -2,22 | 0,023861 | 0,492097                     |      |
| TC1700002656.mm.1 | 2,12 Lrpprc                  | JUC1700013019.mm.1 | -3,41 | 0,003566 | 0,356223                     |      |
| TC1700002656.mm.1 | 2,12 Lrpprc                  | JUC1700013020.mm.1 | -5,54 | 0,006215 | 0,387912                     |      |
| TC0500001737.mm.1 | -1,22 Cyth3                  | JUC0500008677.mm.1 | 3,13  | 0,014692 | 0,450253                     |      |
| TC0700004301.mm.1 | -1,1 Ino80e                  | JUC0700019020.mm.1 | 3,13  | 0,012113 | 0,432704                     |      |
| TC0900001650.mm.1 | -1,07 Zfp105                 | JUC0900007782.mm.1 | 3,13  | 0,041282 | 0,544166                     |      |
| TC1700001160.mm.1 | 1,03 Birc6                   | JUC1700006013.mm.1 | 3,12  | 0,025058 | 0,496166                     |      |
| TC1700001160.mm.1 | 1,03 Birc6                   | JUC1700005955.mm.1 | 2,17  | 0,039441 | 0,539677                     |      |
| TC1700001160.mm.1 | 1,03 Birc6                   | PSR1700010930.mm.1 | -5,3  | 0,044245 | 0,551191 Alternative 5' Donc | 0,48 |
| TC0100000115.mm.1 | 1,4 Tfp2d                    | JUC0100000450.mm.1 | 3,12  | 0,033722 | 0,523549                     |      |
| TC0100000115.mm.1 | 1,4 Tfp2d                    | PSR0100000834.mm.1 | 2,02  | 0,044261 | 0,551268 Alternative 5' Donc | 0,26 |
| TC0100000115.mm.1 | 1,4 Tfp2d                    | PSR0100000824.mm.1 | -2,88 | 0,002061 | 0,341987 Alternative 3' Acce | 0,3  |
| TC1100004277.mm.1 | -3,18 Ramp2                  | PSR1100015354.mm.1 | 3,12  | 0,012213 | 0,433321 Alternative 3' Acce | 0,27 |
| TC0900003324.mm.1 | -1,89 Bcl9l                  | PSR0900003320.mm.1 | 3,12  | 0,039185 | 0,538692 Alternative 3' Acce | 0,21 |
| TC0X00000916.mm.1 | -2,21 Msn                    | PSR0X00005879.mm.1 | 3,12  | 0,042395 | 0,547599 Alternative 5' Donc | 0,21 |
| TC0X00000916.mm.1 | -2,21 Msn                    | JUC0X00002899.mm.1 | 2,2   | 0,023021 | 0,489186                     |      |
| TC0X00000916.mm.1 | -2,21 Msn                    | JUC0X00002888.mm.1 | 2,02  | 0,045947 | 0,555339                     |      |
| TC0300002334.mm.1 | -1,54 Fdps                   | PSR0300017841.mm.1 | 3,12  | 0,028854 | 0,508485 Cassette Exon       | 0,2  |
| TC1600001070.mm.1 | -1,67 Kcnj15                 | JUC1600004405.mm.1 | 3,12  | 0,00276  | 0,35022                      |      |
| TC1600001070.mm.1 | -1,67 Kcnj15                 | PSR1600008453.mm.1 | 2,08  | 0,015966 | 0,456885 Cassette Exon       | 0,13 |
| TC1200001692.mm.1 | 1,16 Nova1                   | JUC1200006479.mm.1 | 3,12  | 0,014306 | 0,448073                     |      |
| TC1600001277.mm.1 | -1,41 2610318N02Rik          | JUC1600005396.mm.1 | 3,12  | 0,005241 | 0,377642                     |      |
| TC0600002567.mm.1 | -1,03 Tet3                   | JUC0600010353.mm.1 | 3,12  | 0,037663 | 0,53431                      |      |
| TC0600003005.mm.1 | -1,12 Cacna1c                | JUC0600012083.mm.1 | 3,12  | 0,017148 | 0,46232                      |      |
| TC1100003095.mm.1 | 1,28 Pelp1                   | JUC1100014973.mm.1 | 3,12  | 0,019743 | 0,474932                     |      |
| TC0X00003348.mm.1 | 1,05 Tceanc                  | JUC0X00010540.mm.1 | 3,12  | 0,00433  | 0,36486                      |      |
| TC0700000881.mm.1 | 2 Ldha                       | PSR0700007923.mm.1 | 3,11  | 0,045405 | 0,554085 Alternative 3' Acce | 0,34 |
| TC0700000881.mm.1 | 2 Ldha                       | PSR0700007921.mm.1 | 2,31  | 0,047031 | 0,557783 Cassette Exon       | 0,13 |
| TC0700000881.mm.1 | 2 Ldha                       | JUC0700003952.mm.1 | 2,1   | 0,005825 | 0,383169                     |      |
| TC0700000881.mm.1 | 2 Ldha                       | PSR0700007912.mm.1 | -4,96 | 0,025727 | 0,498173 Alternative 3' Acce | 0,4  |
| TC0300001094.mm.1 | -1,32 Fam212b                | PSR0300008841.mm.1 | 3,11  | 0,014109 | 0,447137 Alternative 5' Donc | 0,24 |

|                   |                      |                    |        |          |                              |      |
|-------------------|----------------------|--------------------|--------|----------|------------------------------|------|
| TC0900001652.mm.1 | -1,55 Kif15          | PSR0900013859.mm.1 | 3,11   | 0,025898 | 0,498978 Cassette Exon       | 0,23 |
| TC0900001652.mm.1 | -1,55 Kif15          | PSR0900013853.mm.1 | 2,87   | 0,014304 | 0,448073                     |      |
| TC0900001652.mm.1 | -1,55 Kif15          | PSR0900013886.mm.1 | 2,29   | 0,021718 | 0,484104 Cassette Exon       | 0,1  |
| TC0900001652.mm.1 | -1,55 Kif15          | JUC0900007820.mm.1 | -12,74 | 0,000186 | 0,284485                     |      |
| TC0100000817.mm.1 | -1,16 Neu2           | PSR1000006929.mm.1 | 3,11   | 0,002715 | 0,349612 Cassette Exon       | 0,2  |
| TC1100002066.mm.1 | -1,51 Tbcd           | JUC1100010420.mm.1 | 3,11   | 0,01516  | 0,452699                     |      |
| TC1100002066.mm.1 | -1,51 Tbcd           | JUC1100010415.mm.1 | 2,99   | 0,019809 | 0,475245                     |      |
| TC1100002066.mm.1 | -1,51 Tbcd           | JUC1100010407.mm.1 | 2,27   | 0,015229 | 0,452839                     |      |
| TC1100002066.mm.1 | -1,51 Tbcd           | PSR1100019968.mm.1 | 2,06   | 0,037595 | 0,534053 Cassette Exon       | 0,12 |
| TC1100002066.mm.1 | -1,51 Tbcd           | PSR1100019964.mm.1 | 2,05   | 0,027564 | 0,50444 Cassette Exon        | 0,15 |
| TC1100002066.mm.1 | -1,51 Tbcd           | PSR1100019966.mm.1 | 2,05   | 0,034421 | 0,525828 Cassette Exon       | 0,13 |
| TC1100002066.mm.1 | -1,51 Tbcd           | PSR1100019970.mm.1 | 2,03   | 0,009987 | 0,418456 Cassette Exon       | 0,12 |
| TC1000000717.mm.1 | -2,52 Ggt1           | JUC1000002806.mm.1 | 3,11   | 0,02778  | 0,505265                     |      |
| TC1000000717.mm.1 | -2,52 Ggt1           | PSR1000005096.mm.1 | 2,68   | 0,018156 | 0,467427 Cassette Exon       | 0,12 |
| TC1000000717.mm.1 | -2,52 Ggt1           | JUC1000002797.mm.1 | 2,55   | 0,027894 | 0,505612                     |      |
| TC1000000717.mm.1 | -2,52 Ggt1           | JUC1000002784.mm.1 | 2,13   | 0,017631 | 0,464508                     |      |
| TC1500002284.mm.1 | 1,09 Spryd3          | JUC1500010771.mm.1 | 3,11   | 0,046717 | 0,556856                     |      |
| TC1500002284.mm.1 | 1,09 Spryd3          | JUC1500010775.mm.1 | 2,04   | 0,005372 | 0,378731                     |      |
| TC0700000723.mm.1 | -1,39 Gm4884; Gm2128 | JUC0700002940.mm.1 | 3,11   | 0,017467 | 0,463886                     |      |
| TC0500003047.mm.1 | 1,33 Sart3           | JUC0500014800.mm.1 | 3,11   | 0,023942 | 0,49258                      |      |
| TC0900002997.mm.1 | -1,25 Col6a6         | JUC0900013871.mm.1 | 3,11   | 0,020272 | 0,477245                     |      |
| TC1000000286.mm.1 | -2,67 Trdn           | JUC1000001052.mm.1 | 3,11   | 0,037445 | 0,533849                     |      |
| TC1000000286.mm.1 | -2,67 Trdn           | JUC1000001021.mm.1 | -7,23  | 0,001905 | 0,338712                     |      |
| TC0400001663.mm.1 | -1,31 Myom3          | JUC0400006864.mm.1 | 3,11   | 0,003025 | 0,353502                     |      |
| TC0400001663.mm.1 | -1,31 Myom3          | JUC0400006871.mm.1 | 2,19   | 0,00508  | 0,375342                     |      |
| TC0400001663.mm.1 | -1,31 Myom3          | JUC0400006888.mm.1 | -2,32  | 0,001028 | 0,316361                     |      |
| TC0900001940.mm.1 | 2,6 Glb1l3           | JUC0900009212.mm.1 | 3,1    | 0,004727 | 0,370888                     |      |
| TC0900001940.mm.1 | 2,6 Glb1l3           | JUC0900009222.mm.1 | 2,7    | 0,005308 | 0,378059                     |      |
| TC0900001940.mm.1 | 2,6 Glb1l3           | PSR0900016274.mm.1 | -2,15  | 0,032598 | 0,520272 Alternative 3' Acce | 0,15 |
| TC0900001940.mm.1 | 2,6 Glb1l3           | PSR0900016295.mm.1 | -2,3   | 0,024533 | 0,493992 Cassette Exon       | 0,26 |
| TC0900001940.mm.1 | 2,6 Glb1l3           | JUC0900009226.mm.1 | -2,87  | 0,002464 | 0,349135                     |      |
| TC0900001940.mm.1 | 2,6 Glb1l3           | JUC0900009216.mm.1 | -3,01  | 0,01573  | 0,455416                     |      |
| TC0900001940.mm.1 | 2,6 Glb1l3           | JUC0900009230.mm.1 | -4,23  | 0,018083 | 0,46716                      |      |
| TC0900001940.mm.1 | 2,6 Glb1l3           | PSR0900016294.mm.1 | -4,46  | 0,011364 | 0,427452 Cassette Exon       | 0,41 |
| TC0800000291.mm.1 | 1,42 Ank1            | JUC0800001176.mm.1 | 3,1    | 0,003903 | 0,35953                      |      |
| TC0800000291.mm.1 | 1,42 Ank1            | PSR0800002195.mm.1 | 2,93   | 0,001361 | 0,32572 Cassette Exon        | 0,19 |
| TC0800000291.mm.1 | 1,42 Ank1            | JUC0800001179.mm.1 | 2,72   | 0,004404 | 0,366624                     |      |
| TC0800000291.mm.1 | 1,42 Ank1            | JUC0800001177.mm.1 | 2,68   | 0,028262 | 0,506565                     |      |
| TC0800000291.mm.1 | 1,42 Ank1            | PSR0800002185.mm.1 | 2,66   | 0,000851 | 0,311909 Cassette Exon       | 0,31 |
| TC0800000291.mm.1 | 1,42 Ank1            | PSR0800002225.mm.1 | 2,61   | 0,0114   | 0,427549 Cassette Exon       | 0,05 |
| TC0800000291.mm.1 | 1,42 Ank1            | PSR0800002218.mm.1 | 2,44   | 0,003828 | 0,358463 Cassette Exon       | 0,12 |
| TC0800000291.mm.1 | 1,42 Ank1            | JUC0800001175.mm.1 | 2,32   | 0,006835 | 0,393893                     |      |
| TC0800000291.mm.1 | 1,42 Ank1            | PSR0800002187.mm.1 | 2,07   | 0,004072 | 0,361956 Cassette Exon       | 0,17 |
| TC0800000291.mm.1 | 1,42 Ank1            | PSR0800002252.mm.1 | -2,01  | 0,048037 | 0,559636 Alternative 5' Donc | 0,17 |
| TC0800000291.mm.1 | 1,42 Ank1            | JUC0800001208.mm.1 | -2,03  | 0,032451 | 0,519588                     |      |
| TC0800000291.mm.1 | 1,42 Ank1            | PSR0800002240.mm.1 | -2,05  | 0,031316 | 0,516204 Cassette Exon       | 0,13 |
| TC0800000291.mm.1 | 1,42 Ank1            | PSR0800002210.mm.1 | -2,11  | 0,01851  | 0,469047 Cassette Exon       | 0,06 |
| TC0800000291.mm.1 | 1,42 Ank1            | PSR0800002236.mm.1 | -2,31  | 0,012269 | 0,434074 Cassette Exon       | 0,08 |



|                   |                               |                    |       |          |          |                     |      |
|-------------------|-------------------------------|--------------------|-------|----------|----------|---------------------|------|
| TC0800000291.mm.1 | 1,42 Ank1                     | PSR0800002239.mm.1 | -2,33 | 0,028172 | 0,506368 | Cassette Exon       | 0,31 |
| TC0800000291.mm.1 | 1,42 Ank1                     | PSR0800002249.mm.1 | -2,33 | 0,022385 | 0,486477 | Alternative 5' Donc | 0,2  |
| TC0800000291.mm.1 | 1,42 Ank1                     | JUC0800001219.mm.1 | -2,65 | 0,049939 | 0,563958 |                     |      |
| TC0800000291.mm.1 | 1,42 Ank1                     | PSR0800002246.mm.1 | -2,86 | 0,000156 | 0,272178 | Alternative 5' Donc | 0,26 |
| TC0800000291.mm.1 | 1,42 Ank1                     | JUC0800001216.mm.1 | -2,91 | 0,004464 | 0,367578 |                     |      |
| TC0800000291.mm.1 | 1,42 Ank1                     | JUC0800001214.mm.1 | -3,2  | 0,007509 | 0,401082 |                     |      |
| TC0800000291.mm.1 | 1,42 Ank1                     | PSR0800002247.mm.1 | -3,34 | 0,028309 | 0,506741 | Alternative 5' Donc | 0,26 |
| TC0600001088.mm.1 | -1,67 Lsm3                    | PSR0600008525.mm.1 | 3,1   | 0,034446 | 0,525886 | Alternative 5' Donc | 0,27 |
| TC1300000284.mm.1 | 1,36 Gpld1                    | JUC1300000875.mm.1 | 3,1   | 0,001055 | 0,316361 |                     |      |
| TC1300000284.mm.1 | 1,36 Gpld1                    | JUC1300000873.mm.1 | -2,28 | 0,016283 | 0,458425 |                     |      |
| TC1300000284.mm.1 | 1,36 Gpld1                    | PSR1300001764.mm.1 | -2,3  | 0,025313 | 0,497278 | Alternative 5' Donc | 0,19 |
| TC1300000284.mm.1 | 1,36 Gpld1                    | PSR1300001742.mm.1 | -2,61 | 0,003351 | 0,354243 | Alternative 3' Acce | 0,26 |
| TC0200004645.mm.1 | 1,46 Gfra4; Mir6973b; mmu-mi  | PSR0200039831.mm.1 | 3,1   | 0,012267 | 0,43405  | Alternative 3' Acce | 0,19 |
| TC1200002442.mm.1 | -1,13                         | JUC1200009335.mm.1 | 3,1   | 0,001624 | 0,332831 |                     |      |
| TC1300000464.mm.1 | -1,42 Sycp2l                  | JUC1300001441.mm.1 | 3,1   | 0,034604 | 0,52602  |                     |      |
| TC0800002941.mm.1 | 1,05 Glg1                     | JUC0800012392.mm.1 | 3,1   | 0,013872 | 0,445672 |                     |      |
| TC0800002941.mm.1 | 1,05 Glg1                     | JUC0800012370.mm.1 | -2,25 | 0,031469 | 0,516922 |                     |      |
| TC0500001514.mm.1 | -1,3 Sumf2                    | JUC0500007511.mm.1 | 3,1   | 0,03075  | 0,514077 |                     |      |
| TC0500001514.mm.1 | -1,3 Sumf2                    | JUC0500007516.mm.1 | 2,31  | 0,039093 | 0,538395 |                     |      |
| TC1100000856.mm.1 | -2,27 Myh8                    | JUC1100003697.mm.1 | 3,1   | 0,001929 | 0,340171 |                     |      |
| TC0400001712.mm.1 | -1,01 Rap1gap                 | JUC0400007199.mm.1 | 3,1   | 0,000844 | 0,311909 |                     |      |
| TC0400001712.mm.1 | -1,01 Rap1gap                 | JUC0400007200.mm.1 | 2,61  | 0,026244 | 0,500211 |                     |      |
| TC0400001712.mm.1 | -1,01 Rap1gap                 | JUC0400007214.mm.1 | -2,58 | 0,008236 | 0,405976 |                     |      |
| TC0400003293.mm.1 | -1,32 Skint6                  | PSR0400026224.mm.1 | 3,09  | 0,007707 | 0,402552 | Cassette Exon       | 0,25 |
| TC0400003293.mm.1 | -1,32 Skint6                  | JUC0400013640.mm.1 | 2,63  | 0,032277 | 0,519116 |                     |      |
| TC0400003293.mm.1 | -1,32 Skint6                  | PSR0400026232.mm.1 | -2,09 | 0,001757 | 0,335996 | Cassette Exon       | 0,05 |
| TC0400003293.mm.1 | -1,32 Skint6                  | JUC0400013631.mm.1 | -2,17 | 0,001949 | 0,34055  |                     |      |
| TC0200001664.mm.1 | 1,72 Katnbl1; Slc12a6; Gm219f | JUC0200006149.mm.1 | 3,09  | 0,013491 | 0,443193 |                     |      |
| TC0200001664.mm.1 | 1,72 Katnbl1; Slc12a6; Gm219f | JUC0200006173.mm.1 | -2,09 | 0,023451 | 0,490586 |                     |      |
| TC0200001664.mm.1 | 1,72 Katnbl1; Slc12a6; Gm219f | PSR0200012405.mm.1 | -2,1  | 0,006373 | 0,389488 | Cassette Exon       | 0,13 |
| TC0200001664.mm.1 | 1,72 Katnbl1; Slc12a6; Gm219f | PSR0200012390.mm.1 | -2,46 | 0,024063 | 0,493026 | Cassette Exon       | 0,16 |
| TC0200001664.mm.1 | 1,72 Katnbl1; Slc12a6; Gm219f | PSR0200012409.mm.1 | -2,54 | 0,013178 | 0,44063  | Cassette Exon       | 0,14 |
| TC0200001664.mm.1 | 1,72 Katnbl1; Slc12a6; Gm219f | JUC0200006174.mm.1 | -3,13 | 0,002741 | 0,349612 |                     |      |
| TC0200001664.mm.1 | 1,72 Katnbl1; Slc12a6; Gm219f | JUC0200006171.mm.1 | -3,68 | 0,001664 | 0,335182 |                     |      |
| TC1400002274.mm.1 | -1,07 1700001G11Rik           | JUC1400009626.mm.1 | 3,09  | 0,000639 | 0,304044 |                     |      |
| TC1400002274.mm.1 | -1,07 1700001G11Rik           | PSR1400017573.mm.1 | 2,02  | 0,003959 | 0,359922 | Cassette Exon       | 0,15 |
| TC0300002778.mm.1 | 1,38 Amy2b                    | JUC0300011369.mm.1 | 3,09  | 0,015627 | 0,45509  |                     |      |
| TC0300002778.mm.1 | 1,38 Amy2b                    | PSR0300021827.mm.1 | 2,25  | 0,02531  | 0,49725  | Cassette Exon       | 0,1  |
| TC0300002778.mm.1 | 1,38 Amy2b                    | JUC0300011368.mm.1 | 2,19  | 0,02334  | 0,490131 |                     |      |
| TC0100003536.mm.1 | 1,31 Ppox                     | JUC0100016496.mm.1 | 3,09  | 0,04574  | 0,554855 |                     |      |
| TC0700003793.mm.1 | -1,09 Dgat2                   | JUC0700016905.mm.1 | 3,09  | 0,018546 | 0,469354 |                     |      |
| TC0700002270.mm.1 | -1,31 Gm18191                 | JUC0700010905.mm.1 | 3,09  | 0,000466 | 0,298999 |                     |      |
| TC1100001020.mm.1 | -1,39 Trpv3                   | JUC1100004892.mm.1 | 3,09  | 0,038993 | 0,537976 |                     |      |
| TC1000002067.mm.1 | 1,05 Nr2e1                    | JUC1000008032.mm.1 | 3,09  | 0,0405   | 0,542217 |                     |      |
| TC0900002570.mm.1 | -1,65 4930502A04Rik           | JUC0900012076.mm.1 | 3,09  | 0,008575 | 0,40821  |                     |      |
| TC0700003823.mm.1 | 4,14 Plekhhb1                 | JUC0700017035.mm.1 | 3,08  | 0,008882 | 0,410619 |                     |      |
| TC0700003823.mm.1 | 4,14 Plekhhb1                 | PSR0700032203.mm.1 | 2,73  | 0,000759 | 0,308387 | Cassette Exon       | 0,29 |
| TC0700003823.mm.1 | 4,14 Plekhhb1                 | PSR0700032212.mm.1 | -2,19 | 0,018917 | 0,471305 |                     |      |

|                   |                             |                    |       |          |                              |      |
|-------------------|-----------------------------|--------------------|-------|----------|------------------------------|------|
| TC0700003823.mm.1 | 4,14 Plekhh1                | JUC0700017038.mm.1 | -2,93 | 0,008841 | 0,410293                     |      |
| TC0700003823.mm.1 | 4,14 Plekhh1                | PSR0700032216.mm.1 | -3,5  | 0,04574  | 0,554855 Alternative 5' Donc | 0,28 |
| TC0700003823.mm.1 | 4,14 Plekhh1                | PSR0700032220.mm.1 | -3,59 | 0,014764 | 0,450801 Alternative 5' Donc | 0,41 |
| TC1000001260.mm.1 | 4,49 Lin7a                  | PSR1000009502.mm.1 | 3,08  | 0,011399 | 0,427549 Alternative 3' Acce | 0,28 |
| TC1000001260.mm.1 | 4,49 Lin7a                  | JUC1000005124.mm.1 | 2,77  | 0,002878 | 0,352207                     |      |
| TC1000001260.mm.1 | 4,49 Lin7a                  | PSR1000009497.mm.1 | 2,06  | 0,002466 | 0,349135 Cassette Exon       | 0,3  |
| TC1000001260.mm.1 | 4,49 Lin7a                  | PSR1000009499.mm.1 | -2,67 | 0,037141 | 0,533034 Cassette Exon       | 0,35 |
| TC1000001260.mm.1 | 4,49 Lin7a                  | JUC1000005128.mm.1 | -3,02 | 0,025686 | 0,498173                     |      |
| TC1000001260.mm.1 | 4,49 Lin7a                  | PSR1000009496.mm.1 | -3,33 | 0,004095 | 0,36228 Cassette Exon        | 0,2  |
| TC1000001260.mm.1 | 4,49 Lin7a                  | JUC1000005130.mm.1 | -3,82 | 0,025364 | 0,497403                     |      |
| TC1000001260.mm.1 | 4,49 Lin7a                  | PSR1000009495.mm.1 | -6,08 | 0,001807 | 0,336311 Cassette Exon       | 0,29 |
| TC0700004358.mm.1 | -1,95 Cox6a2                | PSR0700036594.mm.1 | 3,08  | 0,005274 | 0,378059 Alternative 3' Acce | 0,33 |
| TC1500000591.mm.1 | 1,01 Mroh1; Mir6954; mmu-mi | JUC1500002446.mm.1 | 3,08  | 0,031225 | 0,515879                     |      |
| TC1500000591.mm.1 | 1,01 Mroh1; Mir6954; mmu-mi | JUC1500002427.mm.1 | -2,02 | 0,048817 | 0,561556                     |      |
| TC1500000591.mm.1 | 1,01 Mroh1; Mir6954; mmu-mi | PSR1500004233.mm.1 | -2,79 | 0,002049 | 0,341391 Alternative 5' Donc | 0,29 |
| TC0200004948.mm.1 | 2,55 Gm14216                | PSR0200041964.mm.1 | 3,08  | 0,014163 | 0,447466 Cassette Exon       | 0,19 |
| TC0200004948.mm.1 | 2,55 Gm14216                | JUC0200021660.mm.1 | -4,5  | 0,047349 | 0,558291                     |      |
| TC0900001892.mm.1 | 2,46 Elavl3                 | PSR0900015972.mm.1 | 3,08  | 0,005726 | 0,382767 Cassette Exon       | 0,05 |
| TC0900001892.mm.1 | 2,46 Elavl3                 | PSR0900015971.mm.1 | -2,45 | 0,026117 | 0,499897 Alternative 3' Acce | 0,14 |
| TC0900001892.mm.1 | 2,46 Elavl3                 | PSR0900015978.mm.1 | -2,64 | 0,008001 | 0,403872 Cassette Exon       | 0,14 |
| TC0900001892.mm.1 | 2,46 Elavl3                 | JUC0900009031.mm.1 | -3,11 | 0,008586 | 0,40821                      |      |
| TC0900001892.mm.1 | 2,46 Elavl3                 | JUC0900009037.mm.1 | -4,24 | 0,037294 | 0,533573                     |      |
| TC0900001892.mm.1 | 2,46 Elavl3                 | JUC0900009038.mm.1 | -4,27 | 0,035266 | 0,52837                      |      |
| TC1400001441.mm.1 | -1,26 4930452B06Rik         | JUC1400005841.mm.1 | 3,08  | 0,017639 | 0,464582                     |      |
| TC1700002240.mm.1 | -1,1 Daam2                  | JUC1700011257.mm.1 | 3,08  | 0,023601 | 0,490995                     |      |
| TC1700002240.mm.1 | -1,1 Daam2                  | JUC1700011258.mm.1 | -2,38 | 0,013629 | 0,444136                     |      |
| TC0100002285.mm.1 | -1,02 Slc40a1               | JUC0100010450.mm.1 | 3,08  | 0,025761 | 0,498442                     |      |
| TC0100003778.mm.1 | -1,12 Kcnk2                 | JUC0100017525.mm.1 | 3,08  | 0,001893 | 0,338712                     |      |
| TC0100003778.mm.1 | -1,12 Kcnk2                 | JUC0100017529.mm.1 | 2,21  | 0,020211 | 0,477145                     |      |
| TC0500000286.mm.1 | -1,32 Hadhb                 | JUC0500001236.mm.1 | 3,08  | 0,001771 | 0,336311                     |      |
| TC0500001327.mm.1 | 1,03 Tbx3                   | JUC0500006318.mm.1 | 3,08  | 0,033301 | 0,522389                     |      |
| TC0500001327.mm.1 | 1,03 Tbx3                   | JUC0500006315.mm.1 | 2,09  | 0,012355 | 0,434613                     |      |
| TC1000002944.mm.1 | 1,38 Nup107                 | JUC1000012246.mm.1 | 3,08  | 0,00792  | 0,403819                     |      |
| TC0400000706.mm.1 | -1,15 Gm11210               | JUC0400002529.mm.1 | 3,08  | 0,042809 | 0,548097                     |      |
| TC0200002543.mm.1 | 6,6 Slc12a5; Gm11459        | JUC0200010605.mm.1 | 3,07  | 0,00002  | 0,211693                     |      |
| TC0200002543.mm.1 | 6,6 Slc12a5; Gm11459        | PSR0200020865.mm.1 | 2,99  | 0,032687 | 0,520439 Cassette Exon       | 0,08 |
| TC0200002543.mm.1 | 6,6 Slc12a5; Gm11459        | JUC0200010597.mm.1 | 2,89  | 0,005454 | 0,379939                     |      |
| TC0200002543.mm.1 | 6,6 Slc12a5; Gm11459        | JUC0200010604.mm.1 | 2,43  | 0,004206 | 0,363236                     |      |
| TC0200002543.mm.1 | 6,6 Slc12a5; Gm11459        | PSR0200020877.mm.1 | 2,41  | 0,038494 | 0,536557 Cassette Exon       | 0,01 |
| TC0200002543.mm.1 | 6,6 Slc12a5; Gm11459        | PSR0200020866.mm.1 | 2,39  | 0,016728 | 0,460261                     |      |
| TC0200002543.mm.1 | 6,6 Slc12a5; Gm11459        | JUC0200010595.mm.1 | 2,29  | 0,012704 | 0,436428                     |      |
| TC0200002543.mm.1 | 6,6 Slc12a5; Gm11459        | PSR0200020871.mm.1 | 2,12  | 0,010872 | 0,424174 Cassette Exon       | 0,17 |
| TC0200002543.mm.1 | 6,6 Slc12a5; Gm11459        | PSR0200020861.mm.1 | -2,05 | 0,000153 | 0,272178 Cassette Exon       | 0,37 |
| TC0200002543.mm.1 | 6,6 Slc12a5; Gm11459        | PSR0200020862.mm.1 | -2,33 | 0,000959 | 0,313363 Cassette Exon       | 0,33 |
| TC0200002543.mm.1 | 6,6 Slc12a5; Gm11459        | PSR0200020884.mm.1 | -3    | 0,006028 | 0,386586 Cassette Exon       | 0,46 |
| TC0200002543.mm.1 | 6,6 Slc12a5; Gm11459        | PSR0200020860.mm.1 | -3,04 | 0,00448  | 0,367858 Cassette Exon       | 0,32 |
| TC0200002543.mm.1 | 6,6 Slc12a5; Gm11459        | JUC0200010589.mm.1 | -3,58 | 0,005705 | 0,382524                     |      |
| TC0200002543.mm.1 | 6,6 Slc12a5; Gm11459        | PSR0200020885.mm.1 | -3,61 | 0,000005 | 0,179072 Cassette Exon       | 0,37 |

|                   |                               |                    |        |          |                              |      |
|-------------------|-------------------------------|--------------------|--------|----------|------------------------------|------|
| TC0200002543.mm.1 | 6,6 Slc12a5; Gm11459          | PSR0200020869.mm.1 | -4,14  | 0,003106 | 0,353892 Alternative 3' Acce | 0,39 |
| TC0200002543.mm.1 | 6,6 Slc12a5; Gm11459          | JUC0200010607.mm.1 | -4,37  | 0,027843 | 0,505564                     |      |
| TC0200002543.mm.1 | 6,6 Slc12a5; Gm11459          | PSR0200020855.mm.1 | -4,54  | 0,010372 | 0,421273 Cassette Exon       | 0,55 |
| TC0200002543.mm.1 | 6,6 Slc12a5; Gm11459          | JUC0200010587.mm.1 | -4,72  | 0,000348 | 0,290082                     |      |
| TC0200002543.mm.1 | 6,6 Slc12a5; Gm11459          | JUC0200010591.mm.1 | -4,72  | 0,000182 | 0,283791                     |      |
| TC0200002543.mm.1 | 6,6 Slc12a5; Gm11459          | JUC0200010601.mm.1 | -5,13  | 0,012598 | 0,435933                     |      |
| TC0200002543.mm.1 | 6,6 Slc12a5; Gm11459          | JUC0200010608.mm.1 | -5,3   | 0,000996 | 0,316361                     |      |
| TC0200002543.mm.1 | 6,6 Slc12a5; Gm11459          | JUC0200010602.mm.1 | -7,17  | 0,000013 | 0,185427                     |      |
| TC0200002543.mm.1 | 6,6 Slc12a5; Gm11459          | PSR0200020859.mm.1 | -7,68  | 0,002702 | 0,349612 Cassette Exon       | 0,28 |
| TC0200002543.mm.1 | 6,6 Slc12a5; Gm11459          | PSR0200020854.mm.1 | -7,9   | 0,001895 | 0,338712 Cassette Exon       | 0,41 |
| TC0200002543.mm.1 | 6,6 Slc12a5; Gm11459          | PSR0200020856.mm.1 | -8,73  | 0,000308 | 0,288663 Cassette Exon       | 0,41 |
| TC0200002543.mm.1 | 6,6 Slc12a5; Gm11459          | PSR0200020888.mm.1 | -9,36  | 0,000769 | 0,308403 Intron Retention    | 0,35 |
| TC0200002543.mm.1 | 6,6 Slc12a5; Gm11459          | PSR0200020886.mm.1 | -10,75 | 0,000642 | 0,304044 Alternative 3' Acce | 0,31 |
| TC0200002543.mm.1 | 6,6 Slc12a5; Gm11459          | PSR0200020858.mm.1 | -12,52 | 0,0006   | 0,304044 Cassette Exon       | 0,28 |
| TC0200002543.mm.1 | 6,6 Slc12a5; Gm11459          | JUC0200010584.mm.1 | -15,01 | 0,000851 | 0,311909                     |      |
| TC0200002543.mm.1 | 6,6 Slc12a5; Gm11459          | JUC0200010612.mm.1 | -17,28 | 0,000097 | 0,261355                     |      |
| TC0200002543.mm.1 | 6,6 Slc12a5; Gm11459          | JUC0200010583.mm.1 | -19,02 | 0,002079 | 0,342181                     |      |
| TC0200002543.mm.1 | 6,6 Slc12a5; Gm11459          | JUC0200010586.mm.1 | -20,74 | 0,002189 | 0,344463                     |      |
| TC0600000250.mm.1 | 3,41 Strip2                   | JUC0600000902.mm.1 | 3,07   | 0,002688 | 0,349612                     |      |
| TC0600000250.mm.1 | 3,41 Strip2                   | PSR0600001777.mm.1 | 2,69   | 0,001338 | 0,325349 Alternative 3' Acce | 0,29 |
| TC0600000250.mm.1 | 3,41 Strip2                   | PSR0600001773.mm.1 | 2,59   | 0,018614 | 0,469723 Cassette Exon       | 0,18 |
| TC0600000250.mm.1 | 3,41 Strip2                   | PSR0600001758.mm.1 | 2,39   | 0,006023 | 0,386586 Cassette Exon       | 0,23 |
| TC0600000250.mm.1 | 3,41 Strip2                   | JUC0600000901.mm.1 | 2,18   | 0,010732 | 0,423745                     |      |
| TC0600000250.mm.1 | 3,41 Strip2                   | PSR0600001756.mm.1 | 2,03   | 0,004798 | 0,371408 Cassette Exon       | 0,14 |
| TC0600000250.mm.1 | 3,41 Strip2                   | PSR0600001762.mm.1 | -2,15  | 0,011374 | 0,427487 Cassette Exon       | 0,05 |
| TC0600000250.mm.1 | 3,41 Strip2                   | JUC0600000912.mm.1 | -2,16  | 0,034468 | 0,525929                     |      |
| TC0600000250.mm.1 | 3,41 Strip2                   | JUC0600000899.mm.1 | -2,78  | 0,028474 | 0,507299                     |      |
| TC0600000250.mm.1 | 3,41 Strip2                   | PSR0600001764.mm.1 | -2,83  | 0,00386  | 0,358861 Intron Retention    | 0,39 |
| TC0600000250.mm.1 | 3,41 Strip2                   | PSR0600001784.mm.1 | -3,12  | 0,002534 | 0,349501 Alternative 5' Donc | 0,34 |
| TC1700001264.mm.1 | -1,31 Dync2li1                | PSR1700011663.mm.1 | 3,07   | 0,048142 | 0,559956 Cassette Exon       | 0,18 |
| TC1700001264.mm.1 | -1,31 Dync2li1                | JUC1700006381.mm.1 | 3,07   | 0,007884 | 0,403723                     |      |
| TC1700001264.mm.1 | -1,31 Dync2li1                | JUC1700006377.mm.1 | 2,98   | 0,045525 | 0,554359                     |      |
| TC0700002145.mm.1 | 1,69 9430041J12Rik            | JUC0700010366.mm.1 | 3,07   | 0,018407 | 0,468484                     |      |
| TC0700002145.mm.1 | 1,69 9430041J12Rik            | PSR0700019493.mm.1 | -2,01  | 0,041296 | 0,544228 Alternative 3' Acce | 0,14 |
| TC0700002145.mm.1 | 1,69 9430041J12Rik            | PSR0700019508.mm.1 | -2,12  | 0,021228 | 0,481319 Alternative 5' Donc | 0,15 |
| TC0700002145.mm.1 | 1,69 9430041J12Rik            | JUC0700010371.mm.1 | -2,53  | 0,028929 | 0,50862                      |      |
| TC0300003222.mm.1 | 1,72 Ovgp1                    | JUC0300004616.mm.1 | 3,07   | 0,009719 | 0,417826                     |      |
| TC0300003222.mm.1 | 1,72 Ovgp1                    | JUC0300004618.mm.1 | 2,52   | 0,026736 | 0,502096                     |      |
| TC0200005092.mm.1 | 1,06 Hnf4aos; O610008F07Rik   | JUC0200022394.mm.1 | 3,07   | 0,01551  | 0,454456                     |      |
| TC0100003550.mm.1 | -1,67 Slamf7                  | JUC0100016573.mm.1 | 3,07   | 0,014997 | 0,452052                     |      |
| TC0100003323.mm.1 | 1,04 Ralgps2                  | JUC0100015582.mm.1 | 3,07   | 0,041103 | 0,543933                     |      |
| TC0600001672.mm.1 | -1,36 Slco1b2                 | JUC0600007001.mm.1 | 3,07   | 0,011038 | 0,425682                     |      |
| TC0600001672.mm.1 | -1,36 Slco1b2                 | JUC0600006995.mm.1 | 2,06   | 0,039458 | 0,539705                     |      |
| TC0900002026.mm.1 | -1,23 9230110F15Rik; RP23-319 | JUC0900009496.mm.1 | 3,07   | 0,014861 | 0,451623                     |      |
| TC0Y00000149.mm.1 | -1,27 Gm20920                 | JUC0Y00000446.mm.1 | 3,07   | 0,013843 | 0,445333                     |      |
| TC0Y00000174.mm.1 | -1,27 Gm20908                 | JUC0Y00000652.mm.1 | 3,07   | 0,013843 | 0,445333                     |      |
| TC0900000232.mm.1 | -1,71 Npsr1                   | PSR0900001777.mm.1 | 3,06   | 0,019554 | 0,474538 Alternative 3' Acce | 0,34 |
| TC0700004475.mm.1 | -1 Stk32c                     | JUC0700019780.mm.1 | 3,06   | 0,009232 | 0,414336                     |      |

|                   |              |                    |       |          |                              |      |
|-------------------|--------------|--------------------|-------|----------|------------------------------|------|
| TC0700004475.mm.1 | -1 Stk32c    | PSR0700037538.mm.1 | 2,96  | 0,004814 | 0,371408 Cassette Exon       | 0,28 |
| TC1000000261.mm.1 | 2,08 Soga3   | PSR1000001800.mm.1 | 3,06  | 0,003295 | 0,354243 Cassette Exon       | 0,27 |
| TC1000000261.mm.1 | 2,08 Soga3   | JUC1000000976.mm.1 | 2,8   | 0,031163 | 0,515677                     |      |
| TC1000000261.mm.1 | 2,08 Soga3   | PSR1000001796.mm.1 | -2,66 | 0,009658 | 0,417484 Cassette Exon       | 0,17 |
| TC1000000261.mm.1 | 2,08 Soga3   | PSR1000001797.mm.1 | -2,95 | 0,003997 | 0,361023 Cassette Exon       | 0,19 |
| TC1000000261.mm.1 | 2,08 Soga3   | PSR1000001798.mm.1 | -2,96 | 0,006565 | 0,39213 Cassette Exon        | 0,19 |
| TC1000000261.mm.1 | 2,08 Soga3   | JUC1000000979.mm.1 | -4,3  | 0,004426 | 0,366832                     |      |
| TC1200000823.mm.1 | -1,72 Fcf1   | JUC1200003354.mm.1 | 3,06  | 0,045001 | 0,552975                     |      |
| TC1200000823.mm.1 | -1,72 Fcf1   | PSR1200005937.mm.1 | 2,39  | 0,000128 | 0,270905 Cassette Exon       | 0,25 |
| TC0200003865.mm.1 | -1,86 Calcr1 | JUC0200017204.mm.1 | 3,06  | 0,027854 | 0,505597                     |      |
| TC0200003865.mm.1 | -1,86 Calcr1 | PSR0200033352.mm.1 | 2,48  | 0,029782 | 0,511132 Alternative 3' Acce | 0,23 |
| TC0400001306.mm.1 | -1,04 Med8   | PSR0400009807.mm.1 | 3,06  | 0,014826 | 0,451164 Alternative 3' Acce | 0,17 |
| TC0900002542.mm.1 | 1,37 Tln2    | JUC0900012057.mm.1 | 3,06  | 0,010842 | 0,424161                     |      |
| TC0900002542.mm.1 | 1,37 Tln2    | JUC0900012001.mm.1 | 2,89  | 0,015179 | 0,452699                     |      |
| TC0900002542.mm.1 | 1,37 Tln2    | JUC0900012060.mm.1 | 2,65  | 0,018533 | 0,469204                     |      |
| TC0900002542.mm.1 | 1,37 Tln2    | JUC0900012027.mm.1 | 2,35  | 0,016794 | 0,460623                     |      |
| TC0900002542.mm.1 | 1,37 Tln2    | PSR0900021433.mm.1 | 2,33  | 0,004029 | 0,361636 Cassette Exon       | 0,06 |
| TC0900002542.mm.1 | 1,37 Tln2    | JUC0900012030.mm.1 | 2,25  | 0,012094 | 0,43255                      |      |
| TC0900002542.mm.1 | 1,37 Tln2    | JUC0900012056.mm.1 | 2,25  | 0,02382  | 0,491955                     |      |
| TC0900002542.mm.1 | 1,37 Tln2    | JUC0900012043.mm.1 | 2,22  | 0,01144  | 0,427685                     |      |
| TC0900002542.mm.1 | 1,37 Tln2    | JUC0900012050.mm.1 | 2,13  | 0,013825 | 0,445193                     |      |
| TC0900002542.mm.1 | 1,37 Tln2    | PSR0900021436.mm.1 | 2,06  | 0,009591 | 0,417183 Cassette Exon       | 0,17 |
| TC0900002542.mm.1 | 1,37 Tln2    | JUC0900012061.mm.1 | -2,36 | 0,008872 | 0,410549                     |      |
| TC0900002542.mm.1 | 1,37 Tln2    | JUC0900012016.mm.1 | -3,69 | 0,02906  | 0,508976                     |      |
| TC1300002099.mm.1 | 1,33 Hnrnpk  | JUC1300006930.mm.1 | 3,06  | 0,016856 | 0,460797                     |      |
| TC1300002099.mm.1 | 1,33 Hnrnpk  | PSR1300013378.mm.1 | 2,18  | 0,037059 | 0,532719 Alternative 3' Acce | 0,17 |
| TC1900001485.mm.1 | -1,09 Sorbs1 | JUC1900007153.mm.1 | 3,06  | 0,002907 | 0,352262                     |      |
| TC1900001485.mm.1 | -1,09 Sorbs1 | JUC1900007148.mm.1 | 2,5   | 0,009109 | 0,413018                     |      |
| TC1100002488.mm.1 | 1,22 Ranbp17 | JUC1100012037.mm.1 | 3,06  | 0,042795 | 0,548097                     |      |
| TC1100000110.mm.1 | 1,61         | PSR1100001141.mm.1 | 3,05  | 0,017133 | 0,46232 Alternative 3' Acce  | 0,33 |
| TC1100003137.mm.1 | 1,97 Pitpnm3 | PSR1100029057.mm.1 | 3,05  | 0,000905 | 0,313363 Cassette Exon       | 0,17 |
| TC1100003137.mm.1 | 1,97 Pitpnm3 | JUC1100015209.mm.1 | 2,76  | 0,03215  | 0,518586                     |      |
| TC1100003137.mm.1 | 1,97 Pitpnm3 | PSR1100029058.mm.1 | 2,46  | 0,004364 | 0,365487 Cassette Exon       | 0,08 |
| TC1100003137.mm.1 | 1,97 Pitpnm3 | JUC1100015222.mm.1 | 2,35  | 0,020029 | 0,476453                     |      |
| TC1100003137.mm.1 | 1,97 Pitpnm3 | PSR1100029053.mm.1 | 2,24  | 0,002825 | 0,352207 Cassette Exon       | 0,13 |
| TC1100003137.mm.1 | 1,97 Pitpnm3 | JUC1100015213.mm.1 | 2,23  | 0,002521 | 0,349501                     |      |
| TC1100003137.mm.1 | 1,97 Pitpnm3 | PSR1100029062.mm.1 | -2,1  | 0,043467 | 0,549841 Cassette Exon       | 0,09 |
| TC1100003137.mm.1 | 1,97 Pitpnm3 | PSR1100029037.mm.1 | -2,11 | 0,011686 | 0,429961 Alternative 5' Donc | 0,18 |
| TC1100003137.mm.1 | 1,97 Pitpnm3 | PSR1100029059.mm.1 | -2,36 | 0,014305 | 0,448073 Alternative 5' Donc | 0,16 |
| TC1100003137.mm.1 | 1,97 Pitpnm3 | JUC1100015221.mm.1 | -2,36 | 0,010761 | 0,423859                     |      |
| TC1100003137.mm.1 | 1,97 Pitpnm3 | PSR1100029035.mm.1 | -2,39 | 0,042205 | 0,546983 Cassette Exon       | 0,15 |
| TC1100003137.mm.1 | 1,97 Pitpnm3 | PSR1100029039.mm.1 | -2,47 | 0,000862 | 0,311909 Alternative 3' Acce | 0,21 |
| TC1100003137.mm.1 | 1,97 Pitpnm3 | JUC1100015215.mm.1 | -2,48 | 0,030319 | 0,51274                      |      |
| TC1300000405.mm.1 | -1,21 Cdyl   | JUC1300001251.mm.1 | 3,05  | 0,006519 | 0,391382                     |      |
| TC1300000405.mm.1 | -1,21 Cdyl   | PSR1300002451.mm.1 | 2,16  | 0,01369  | 0,444581 Alternative 5' Donc | 0,16 |
| TC1300000405.mm.1 | -1,21 Cdyl   | JUC1300001254.mm.1 | 2,02  | 0,032626 | 0,520338                     |      |
| TC0200000507.mm.1 | 1,18 Rapgef1 | JUC0200001828.mm.1 | 3,05  | 0,004621 | 0,369794                     |      |
| TC0200000507.mm.1 | 1,18 Rapgef1 | PSR0200003684.mm.1 | 2,15  | 0,042006 | 0,546101 Cassette Exon       | 0,12 |

|                   |                              |                    |       |          |                              |      |
|-------------------|------------------------------|--------------------|-------|----------|------------------------------|------|
| TC0700003854.mm.1 | -1,07 Nup98                  | JUC0700017259.mm.1 | 3,05  | 0,00014  | 0,272178                     |      |
| TC0700003854.mm.1 | -1,07 Nup98                  | JUC0700017252.mm.1 | 2,27  | 0,039626 | 0,540106                     |      |
| TC0900002010.mm.1 | -1,01 Fam118b                | JUC0900009450.mm.1 | 3,05  | 0,00558  | 0,381035                     |      |
| TC0X00002108.mm.1 | 1,18 Thoc2                   | JUC0X00006838.mm.1 | 3,05  | 0,000946 | 0,313363                     |      |
| TC0400002470.mm.1 | -1,25 1110017D15Rik          | PSR0400019940.mm.1 | 3,04  | 0,020375 | 0,477572 Alternative 3' Acce | 0,33 |
| TC0700001564.mm.1 | -1,25 Olfr701                | JUC0700006763.mm.1 | 3,04  | 0,016978 | 0,461419                     |      |
| TC0700001564.mm.1 | -1,25 Olfr701                | PSR0700013146.mm.1 | 2,11  | 0,013462 | 0,442805 Alternative 3' Acce | 0,17 |
| TC0200002826.mm.1 | -1,08 Tpd52l2; Gm25184       | JUC0200011822.mm.1 | 3,04  | 0,02693  | 0,502599                     |      |
| TC0200002826.mm.1 | -1,08 Tpd52l2; Gm25184       | JUC0200011821.mm.1 | 2,58  | 0,000286 | 0,28803                      |      |
| TC1500000395.mm.1 | -1,6 Col14a1                 | JUC1500001616.mm.1 | 3,04  | 0,04843  | 0,560744                     |      |
| TC1500000395.mm.1 | -1,6 Col14a1                 | JUC1500001612.mm.1 | 2,07  | 0,048014 | 0,559589                     |      |
| TC0700000917.mm.1 | 1,05 Gas2                    | JUC0700004167.mm.1 | 3,04  | 0,028854 | 0,508485                     |      |
| TC0700000917.mm.1 | 1,05 Gas2                    | JUC0700004175.mm.1 | -2,52 | 0,011901 | 0,431543                     |      |
| TC0600000269.mm.1 | -1,03 Cpa2                   | JUC0600000977.mm.1 | 3,04  | 0,033795 | 0,523795                     |      |
| TC0400000912.mm.1 | -1,3 Gm12603                 | JUC0400003112.mm.1 | 3,04  | 0,005138 | 0,376442                     |      |
| TC0400003880.mm.1 | -1,06 Clnka                  | JUC0400016715.mm.1 | 3,04  | 0,011147 | 0,426226                     |      |
| TC0100003104.mm.1 | 1,69 Adora1                  | PSR0100025012.mm.1 | 3,03  | 0,043143 | 0,548664 Alternative 5' Donc | 0,32 |
| TC0100003104.mm.1 | 1,69 Adora1                  | PSR0100025015.mm.1 | -2,39 | 0,03428  | 0,525322 Alternative 5' Donc | 0,16 |
| TC0700000486.mm.1 | -1,12 9530053A07Rik          | PSR0700003937.mm.1 | 3,03  | 0,018339 | 0,468225 Alternative 5' Donc | 0,32 |
| TC0900001424.mm.1 | 2,62 Celsr3; Gm23156         | JUC0900006376.mm.1 | 3,03  | 0,012513 | 0,435429                     |      |
| TC0900001424.mm.1 | 2,62 Celsr3; Gm23156         | PSR0900011568.mm.1 | 2,99  | 0,020118 | 0,47686 Mutually Exclusive   | 0,19 |
| TC0900001424.mm.1 | 2,62 Celsr3; Gm23156         | JUC0900006386.mm.1 | 2,77  | 0,031188 | 0,515739                     |      |
| TC0900001424.mm.1 | 2,62 Celsr3; Gm23156         | PSR0900011579.mm.1 | 2,63  | 0,001592 | 0,331726 Cassette Exon       | 0,15 |
| TC0900001424.mm.1 | 2,62 Celsr3; Gm23156         | PSR0900011567.mm.1 | 2,26  | 0,002779 | 0,351017 Cassette Exon       | 0,05 |
| TC0900001424.mm.1 | 2,62 Celsr3; Gm23156         | PSR0900011543.mm.1 | 2,18  | 0,032218 | 0,518916 Cassette Exon       | 0,12 |
| TC0900001424.mm.1 | 2,62 Celsr3; Gm23156         | PSR0900011573.mm.1 | 2,11  | 0,015174 | 0,452699 Mutually Exclusive  | 0,11 |
| TC0900001424.mm.1 | 2,62 Celsr3; Gm23156         | PSR0900011570.mm.1 | -2,16 | 0,001939 | 0,340349 Mutually Exclusive  | 0,19 |
| TC0900001424.mm.1 | 2,62 Celsr3; Gm23156         | JUC0900006387.mm.1 | -2,19 | 0,009587 | 0,417183                     |      |
| TC0900001424.mm.1 | 2,62 Celsr3; Gm23156         | JUC0900006394.mm.1 | -2,26 | 0,041442 | 0,544646                     |      |
| TC0900001424.mm.1 | 2,62 Celsr3; Gm23156         | PSR0900011553.mm.1 | -2,38 | 0,014755 | 0,450728 Cassette Exon       | 0,21 |
| TC0900001424.mm.1 | 2,62 Celsr3; Gm23156         | JUC0900006399.mm.1 | -2,47 | 0,007697 | 0,402552                     |      |
| TC0900001424.mm.1 | 2,62 Celsr3; Gm23156         | PSR0900011558.mm.1 | -2,6  | 0,001865 | 0,337974 Cassette Exon       | 0,28 |
| TC0900001424.mm.1 | 2,62 Celsr3; Gm23156         | JUC0900006390.mm.1 | -2,61 | 0,031981 | 0,518197                     |      |
| TC0900001424.mm.1 | 2,62 Celsr3; Gm23156         | JUC0900006378.mm.1 | -2,8  | 0,000538 | 0,304044                     |      |
| TC0900001424.mm.1 | 2,62 Celsr3; Gm23156         | JUC0900006372.mm.1 | -2,94 | 0,004165 | 0,3623                       |      |
| TC0900001424.mm.1 | 2,62 Celsr3; Gm23156         | JUC0900006388.mm.1 | -3,89 | 0,000251 | 0,28803                      |      |
| TC0900001424.mm.1 | 2,62 Celsr3; Gm23156         | JUC0900006383.mm.1 | -4,3  | 0,001368 | 0,32572                      |      |
| TC0200005154.mm.1 | -2,45                        | PSR0200044037.mm.1 | 3,03  | 0,010835 | 0,424161 Cassette Exon       | 0,25 |
| TC0200005154.mm.1 | -2,45                        | JUC0200022720.mm.1 | 2,4   | 0,043549 | 0,550022                     |      |
| TC0500001531.mm.1 | 2,17 Caln1                   | JUC0500007592.mm.1 | 3,03  | 0,041331 | 0,544314                     |      |
| TC0500001531.mm.1 | 2,17 Caln1                   | PSR0500013861.mm.1 | -2,03 | 0,009565 | 0,416927 Cassette Exon       | 0,12 |
| TC0500001531.mm.1 | 2,17 Caln1                   | PSR0500013852.mm.1 | -2,71 | 0,014863 | 0,451623 Cassette Exon       | 0,16 |
| TC0500001531.mm.1 | 2,17 Caln1                   | PSR0500013854.mm.1 | -3,13 | 0,017641 | 0,464582 Cassette Exon       | 0,23 |
| TC0500001531.mm.1 | 2,17 Caln1                   | PSR0500013856.mm.1 | -3,62 | 0,002781 | 0,351017 Cassette Exon       | 0,19 |
| TC0300002325.mm.1 | -1,07 1500004A13Rik; RP23-19 | PSR0300017715.mm.1 | 3,03  | 0,02623  | 0,50019 Alternative 5' Donc  | 0,11 |
| TC1700001927.mm.1 | -1,15 Cyp21a1                | JUC1700009708.mm.1 | 3,03  | 0,040142 | 0,541609                     |      |
| TC0900000153.mm.1 | 1,35 Zfp317                  | JUC0900000505.mm.1 | 3,03  | 0,037635 | 0,534189                     |      |
| TC0600002781.mm.1 | -1,34 1700010K10Rik          | JUC0600011211.mm.1 | 3,03  | 0,004009 | 0,36119                      |      |

|                   |                    |                    |       |          |          |                          |
|-------------------|--------------------|--------------------|-------|----------|----------|--------------------------|
| TC0700003740.mm.1 | 1,42 Pcf11         | JUC0700016659.mm.1 | 3,03  | 0,006656 | 0,393187 |                          |
| TC0700003740.mm.1 | 1,42 Pcf11         | JUC0700016660.mm.1 | -2,43 | 0,004454 | 0,367239 |                          |
| TC1200000866.mm.1 | 4,19 Tmem63c       | PSR1200006336.mm.1 | 3,02  | 0,002078 | 0,342181 | Cassette Exon 0,19       |
| TC1200000866.mm.1 | 4,19 Tmem63c       | PSR1200006335.mm.1 | 2,08  | 0,016199 | 0,458183 | Cassette Exon 0,09       |
| TC1200000866.mm.1 | 4,19 Tmem63c       | JUC1200003586.mm.1 | -2,15 | 0,029125 | 0,509285 |                          |
| TC1200000866.mm.1 | 4,19 Tmem63c       | PSR1200006345.mm.1 | -2,32 | 0,002856 | 0,352207 | Cassette Exon 0,13       |
| TC1200000866.mm.1 | 4,19 Tmem63c       | JUC1200003585.mm.1 | -3,14 | 0,004815 | 0,371408 |                          |
| TC1200000866.mm.1 | 4,19 Tmem63c       | PSR1200006328.mm.1 | -3,28 | 0,003786 | 0,357586 | Cassette Exon 0,37       |
| TC1200000866.mm.1 | 4,19 Tmem63c       | JUC1200003577.mm.1 | -3,4  | 0,009947 | 0,41841  |                          |
| TC1200000866.mm.1 | 4,19 Tmem63c       | PSR1200006327.mm.1 | -3,46 | 0,002496 | 0,349135 | Cassette Exon 0,02       |
| TC1200000866.mm.1 | 4,19 Tmem63c       | PSR1200006329.mm.1 | -3,48 | 0,001524 | 0,330287 | Cassette Exon 0,33       |
| TC1200000866.mm.1 | 4,19 Tmem63c       | PSR1200006354.mm.1 | -3,75 | 0,010142 | 0,419347 | Cassette Exon 0,25       |
| TC1200000866.mm.1 | 4,19 Tmem63c       | PSR1200006352.mm.1 | -4,12 | 0,011585 | 0,429241 | Cassette Exon 0,29       |
| TC1200000866.mm.1 | 4,19 Tmem63c       | JUC1200003565.mm.1 | -4,21 | 0,024406 | 0,4937   |                          |
| TC1200000866.mm.1 | 4,19 Tmem63c       | PSR1200006353.mm.1 | -4,36 | 0,015254 | 0,452847 | Cassette Exon 0,28       |
| TC1200000866.mm.1 | 4,19 Tmem63c       | JUC1200003567.mm.1 | -4,65 | 0,001698 | 0,335395 |                          |
| TC1200000866.mm.1 | 4,19 Tmem63c       | PSR1200006325.mm.1 | -4,68 | 0,004675 | 0,370194 | Cassette Exon 0,07       |
| TC1200000866.mm.1 | 4,19 Tmem63c       | PSR1200006322.mm.1 | -5,09 | 0,011459 | 0,427962 | Cassette Exon 0,41       |
| TC1200000866.mm.1 | 4,19 Tmem63c       | PSR1200006323.mm.1 | -5,52 | 0,001572 | 0,331411 | Alternative 3' Acce 0,16 |
| TC1200000866.mm.1 | 4,19 Tmem63c       | JUC1200003583.mm.1 | -5,63 | 0,00021  | 0,28803  |                          |
| TCOX00002815.mm.1 | 2,54 5330434G04Rik | PSROX00017813.mm.1 | 3,02  | 0,012453 | 0,43528  | Alternative 3' Acce 0,32 |
| TCOX00002815.mm.1 | 2,54 5330434G04Rik | PSROX00017824.mm.1 | 2,35  | 0,020148 | 0,477043 | Cassette Exon 0,12       |
| TCOX00002815.mm.1 | 2,54 5330434G04Rik | PSROX00017821.mm.1 | -2,55 | 0,038612 | 0,536911 | Cassette Exon 0,19       |
| TCOX00002815.mm.1 | 2,54 5330434G04Rik | PSROX00017822.mm.1 | -2,92 | 0,006831 | 0,393893 | Alternative 3' Acce 0,26 |
| TCOX00002815.mm.1 | 2,54 5330434G04Rik | PSROX00017827.mm.1 | -2,99 | 0,007722 | 0,402552 | Alternative 3' Acce 0,19 |
| TCOX00002815.mm.1 | 2,54 5330434G04Rik | PSROX00017828.mm.1 | -3,44 | 0,00023  | 0,28803  | Intron Retention 0,33    |
| TCOX00002815.mm.1 | 2,54 5330434G04Rik | PSROX00017826.mm.1 | -3,5  | 0,016431 | 0,459007 | Alternative 3' Acce 0,19 |
| TCOX00002815.mm.1 | 2,54 5330434G04Rik | JUCOX00008981.mm.1 | -5,98 | 0,01159  | 0,429241 |                          |
| TCOX00000405.mm.1 | 2,02 Sh2d1a        | PSROX00002733.mm.1 | 3,02  | 0,016232 | 0,458312 | Cassette Exon 0,24       |
| TCOX00000405.mm.1 | 2,02 Sh2d1a        | PSROX00002728.mm.1 | -2,37 | 0,036904 | 0,532283 | Alternative 3' Acce 0,3  |
| TCOX00000405.mm.1 | 2,02 Sh2d1a        | PSROX00002726.mm.1 | -3,44 | 0,005551 | 0,380756 | Alternative 3' Acce 0,3  |
| TCOX00000405.mm.1 | 2,02 Sh2d1a        | PSROX00002725.mm.1 | -5,09 | 0,012429 | 0,43528  | Alternative 3' Acce 0,3  |
| TCOX00000405.mm.1 | 2,02 Sh2d1a        | PSROX00002727.mm.1 | -5,19 | 0,029854 | 0,511132 | Alternative 3' Acce 0,3  |
| TCOX00001619.mm.1 | 2,67 Map7d2        | JUCOX00005108.mm.1 | 3,02  | 0,018496 | 0,468939 |                          |
| TCOX00001619.mm.1 | 2,67 Map7d2        | JUCOX00005112.mm.1 | 2,41  | 0,011962 | 0,431914 |                          |
| TCOX00001619.mm.1 | 2,67 Map7d2        | JUCOX00005114.mm.1 | -2,16 | 0,024977 | 0,496    |                          |
| TCOX00001619.mm.1 | 2,67 Map7d2        | PSROX00010170.mm.1 | -2,41 | 0,007635 | 0,402113 | Cassette Exon 0,13       |
| TCOX00001619.mm.1 | 2,67 Map7d2        | PSROX00010189.mm.1 | -2,63 | 0,02934  | 0,509981 | Cassette Exon 0,15       |
| TCOX00001619.mm.1 | 2,67 Map7d2        | PSROX00010176.mm.1 | -2,78 | 0,003673 | 0,357266 | Alternative 3' Acce 0,23 |
| TCOX00001619.mm.1 | 2,67 Map7d2        | PSROX00010178.mm.1 | -2,79 | 0,012327 | 0,434392 |                          |
| TCOX00001619.mm.1 | 2,67 Map7d2        | PSROX00010196.mm.1 | -2,86 | 0,025399 | 0,497403 | Alternative 5' Donc 0,2  |
| TCOX00001619.mm.1 | 2,67 Map7d2        | JUCOX00005120.mm.1 | -2,88 | 0,010033 | 0,41878  |                          |
| TCOX00001619.mm.1 | 2,67 Map7d2        | JUCOX00005115.mm.1 | -3,48 | 0,011602 | 0,429473 |                          |
| TC0700000596.mm.1 | -2,2 Scgb1b12      | PSR0700005285.mm.1 | 3,02  | 0,018984 | 0,471445 | Cassette Exon 0,22       |
| TC0300000778.mm.1 | -1,16 Tpm3         | PSR0300006009.mm.1 | 3,02  | 0,027837 | 0,50552  | Cassette Exon 0,19       |
| TCOX00002739.mm.1 | -2,22 Cited1       | PSROX00017287.mm.1 | 3,02  | 0,03734  | 0,533573 | Cassette Exon 0,19       |
| TCOX00002739.mm.1 | -2,22 Cited1       | PSROX00017283.mm.1 | 2,51  | 0,04191  | 0,545811 | Cassette Exon 0,17       |
| TCOX00002739.mm.1 | -2,22 Cited1       | PSROX00017279.mm.1 | 2,35  | 0,049025 | 0,561902 |                          |

|                   |                |                    |       |          |          |                          |
|-------------------|----------------|--------------------|-------|----------|----------|--------------------------|
| TC0200005442.mm.1 | 2,2 Stmn3      | JUC0200023917.mm.1 | 3,02  | 0,020769 | 0,479303 |                          |
| TC0200005442.mm.1 | 2,2 Stmn3      | PSR0200046406.mm.1 | 2,16  | 0,014338 | 0,448173 | Cassette Exon 0,11       |
| TC0200005442.mm.1 | 2,2 Stmn3      | PSR0200046413.mm.1 | -2,51 | 0,013583 | 0,443703 | Cassette Exon 0,05       |
| TC0200005442.mm.1 | 2,2 Stmn3      | PSR0200046415.mm.1 | -3,03 | 0,020127 | 0,47686  | Alternative 5' Donc 0,08 |
| TC1800001462.mm.1 | 1,02 Nars      | JUC1800006007.mm.1 | 3,02  | 0,037861 | 0,534818 |                          |
| TC1500001690.mm.1 | 1,28 Ptk2      | JUC1500007258.mm.1 | 3,02  | 0,030198 | 0,512394 |                          |
| TC1500001690.mm.1 | 1,28 Ptk2      | JUC1500007224.mm.1 | 2,3   | 0,036848 | 0,532256 |                          |
| TC1500001690.mm.1 | 1,28 Ptk2      | JUC1500007259.mm.1 | -2,64 | 0,033443 | 0,522793 |                          |
| TC0900001633.mm.1 | -1,19 Fam198a  | JUC0900007696.mm.1 | 3,02  | 0,000811 | 0,311886 |                          |
| TC0700001131.mm.1 | -1,61 Ticrr    | JUC0700005115.mm.1 | 3,02  | 0,014752 | 0,450714 |                          |
| TC0600002745.mm.1 | -1,17 Prickle2 | JUC0600011087.mm.1 | 3,02  | 0,000057 | 0,24627  |                          |
| TC0600001258.mm.1 | -1,42 Irak2    | JUC0600005114.mm.1 | 3,02  | 0,045305 | 0,553742 |                          |
| TC0500000057.mm.1 | 1,4 Tmem243    | JUC0500000300.mm.1 | 3,02  | 0,011437 | 0,427663 |                          |
| TC0X00002307.mm.1 | 1,06 Atp11c    | JUC0X00007442.mm.1 | 3,02  | 0,004919 | 0,37289  |                          |
| TC0X00002307.mm.1 | 1,06 Atp11c    | JUC0X00007462.mm.1 | 2,2   | 0,04282  | 0,548097 |                          |
| TC1100001802.mm.1 | -1,49 Helz     | PSR1100016991.mm.1 | 3,01  | 0,024928 | 0,49582  | Cassette Exon 0,25       |
| TC1100001802.mm.1 | -1,49 Helz     | PSR1100017000.mm.1 | 2,52  | 0,043766 | 0,55037  | Cassette Exon 0,15       |
| TC1200001931.mm.1 | 1,5 Kcnh5      | PSR1200013260.mm.1 | 3,01  | 0,003118 | 0,353892 | Cassette Exon 0,18       |
| TC1200001931.mm.1 | 1,5 Kcnh5      | PSR1200013266.mm.1 | 2,88  | 0,008726 | 0,409438 | Cassette Exon 0,23       |
| TC1200001931.mm.1 | 1,5 Kcnh5      | JUC1200007358.mm.1 | 2,43  | 0,012672 | 0,43631  |                          |
| TC1200001931.mm.1 | 1,5 Kcnh5      | PSR1200013258.mm.1 | 2,32  | 0,046482 | 0,556634 | Cassette Exon 0,12       |
| TC1200001931.mm.1 | 1,5 Kcnh5      | PSR1200013265.mm.1 | 2,16  | 0,031856 | 0,517902 | Cassette Exon 0,13       |
| TC0X00002803.mm.1 | -1,56 Zdhhc15  | JUC0X00008928.mm.1 | 3,01  | 0,002481 | 0,349135 |                          |
| TC0X00002803.mm.1 | -1,56 Zdhhc15  | PSR0X00017673.mm.1 | 2,28  | 0,005582 | 0,381035 | Cassette Exon 0,21       |
| TC0700003171.mm.1 | 6,25 Gm22130   | PSR0700028355.mm.1 | 3,01  | 0,001078 | 0,317191 | Cassette Exon 0,19       |
| TC1200001725.mm.1 | 1,04 Heatr5a   | JUC1200006608.mm.1 | 3,01  | 0,018299 | 0,468049 |                          |
| TC1200001725.mm.1 | 1,04 Heatr5a   | JUC1200006597.mm.1 | 2,81  | 0,01499  | 0,452048 |                          |
| TC1200001725.mm.1 | 1,04 Heatr5a   | JUC1200006596.mm.1 | 2,41  | 0,000878 | 0,311909 |                          |
| TC1200001725.mm.1 | 1,04 Heatr5a   | PSR1200011889.mm.1 | 2,27  | 0,013208 | 0,440872 | Cassette Exon 0,14       |
| TC1200001725.mm.1 | 1,04 Heatr5a   | JUC1200006599.mm.1 | 2,23  | 0,031853 | 0,517902 |                          |
| TC1200001725.mm.1 | 1,04 Heatr5a   | PSR1200011890.mm.1 | 2,17  | 0,035668 | 0,528966 | Cassette Exon 0,12       |
| TC1200001725.mm.1 | 1,04 Heatr5a   | PSR1200011872.mm.1 | 2,1   | 0,024718 | 0,494838 | Cassette Exon 0,16       |
| TC1200001725.mm.1 | 1,04 Heatr5a   | JUC1200011882.mm.1 | 2,06  | 0,007367 | 0,39938  | Cassette Exon 0,19       |
| TC1700001500.mm.1 | 1,43 Pcd2      | JUC1700007333.mm.1 | 3,01  | 0,041166 | 0,544039 |                          |
| TC1700001500.mm.1 | 1,43 Pcd2      | PSR1700013436.mm.1 | -2,16 | 0,031266 | 0,516032 | Alternative 3' Acce 0,18 |
| TC1700000665.mm.1 | -1,95 Ly6g6e   | PSR1700006712.mm.1 | 3,01  | 0,02525  | 0,496939 | Alternative 3' Acce 0,15 |
| TC1700000665.mm.1 | -1,95 Ly6g6e   | PSR1700006717.mm.1 | 2,1   | 0,03104  | 0,515011 | Cassette Exon 0,14       |
| TC1800000456.mm.1 | -1,06          | JUC1800001880.mm.1 | 3,01  | 0,030655 | 0,513785 |                          |
| TC0100000985.mm.1 | 1,17 Cntnap5b  | PSR0100008268.mm.1 | 3,01  | 0,004283 | 0,363973 |                          |
| TC0100000985.mm.1 | 1,17 Cntnap5b  | JUC0100004748.mm.1 | 2,48  | 0,019202 | 0,472922 |                          |
| TC0100000985.mm.1 | 1,17 Cntnap5b  | JUC0100004753.mm.1 | -2,2  | 0,0259   | 0,498978 |                          |
| TC0100000985.mm.1 | 1,17 Cntnap5b  | JUC0100004766.mm.1 | -2,61 | 0,049575 | 0,563357 |                          |
| TC1700000412.mm.1 | 1,09 Neur11b   | JUC1700001897.mm.1 | 3,01  | 0,009847 | 0,417839 |                          |
| TC0600003503.mm.1 | -1,29 Herc6    | JUC0600002711.mm.1 | 3,01  | 0,00472  | 0,370888 |                          |
| TC0600003503.mm.1 | -1,29 Herc6    | JUC0600002703.mm.1 | 2,23  | 0,008577 | 0,40821  |                          |
| TC0600002733.mm.1 | 1,14 Grip2     | JUC0600011036.mm.1 | 3,01  | 0,000322 | 0,288663 |                          |
| TC0600003604.mm.1 | -1,09 Atn1     | JUC0600012584.mm.1 | 3,01  | 0,037915 | 0,535116 |                          |
| TC1000001708.mm.1 | -1,02 Ust      | JUC1000006773.mm.1 | 3,01  | 0,040572 | 0,542455 |                          |

|                   |                              |                    |       |          |                              |      |
|-------------------|------------------------------|--------------------|-------|----------|------------------------------|------|
| TC100000718.mm.1  | -1,44 Ggt5                   | JUC1000002822.mm.1 | 3,01  | 0,029633 | 0,510569                     |      |
| TC0500003556.mm.1 | -1,29 Zdhhc4                 | PSR0500032603.mm.1 | 3     | 0,011688 | 0,429969 Alternative 3' Acce | 0,28 |
| TC0800002959.mm.1 | 1,22 Tmem231                 | JUC0800012501.mm.1 | 3     | 0,048584 | 0,561078                     |      |
| TC0700001431.mm.1 | -1,17 Arap1                  | JUC0700006355.mm.1 | 3     | 0,026668 | 0,501915                     |      |
| TC0700001431.mm.1 | -1,17 Arap1                  | JUC0700006361.mm.1 | -2,34 | 0,016209 | 0,458312                     |      |
| TC0700002491.mm.1 | -1,15 Relb                   | JUC0700011729.mm.1 | 3     | 0,025249 | 0,496939                     |      |
| TC1100000930.mm.1 | -1,03 Ybx2                   | JUC1100004200.mm.1 | 3     | 0,010033 | 0,41878                      |      |
| TC1100001744.mm.1 | 1,23 Tlk2                    | JUC1100008565.mm.1 | 3     | 0,016818 | 0,460623                     |      |
| TC0400003208.mm.1 | 1 Acot11                     | JUC0400013284.mm.1 | 3     | 0,039194 | 0,538692                     |      |
| TC1800000105.mm.1 | 2,36 Ttc39c                  | JUC1800000467.mm.1 | 2,99  | 0,009262 | 0,414559                     |      |
| TC1800000105.mm.1 | 2,36 Ttc39c                  | JUC1800000465.mm.1 | 2,78  | 0,010591 | 0,42255                      |      |
| TC1800000105.mm.1 | 2,36 Ttc39c                  | PSR1800000797.mm.1 | -2,25 | 0,004943 | 0,373242 Alternative 5' Donc | 0,19 |
| TC1800000105.mm.1 | 2,36 Ttc39c                  | PSR1800000793.mm.1 | -2,81 | 0,012714 | 0,43654 Alternative 3' Acce  | 0,25 |
| TC1800000105.mm.1 | 2,36 Ttc39c                  | PSR1800000798.mm.1 | -2,81 | 0,000565 | 0,304044 Cassette Exon       | 0,09 |
| TC1800000105.mm.1 | 2,36 Ttc39c                  | PSR1800000792.mm.1 | -3,56 | 0,002421 | 0,34896 Alternative 3' Acce  | 0,25 |
| TC1800000105.mm.1 | 2,36 Ttc39c                  | PSR1800000802.mm.1 | -3,93 | 0,000445 | 0,297771 Alternative 5' Donc | 0,52 |
| TC0700000038.mm.1 | 2,37 Brsk1                   | JUC0700000242.mm.1 | 2,99  | 0,024249 | 0,493315                     |      |
| TC0700000038.mm.1 | 2,37 Brsk1                   | JUC0700000234.mm.1 | 2,87  | 0,002775 | 0,350935                     |      |
| TC0700000038.mm.1 | 2,37 Brsk1                   | PSR0700000478.mm.1 | -2,11 | 0,023057 | 0,489443 Cassette Exon       | 0,12 |
| TC0700000038.mm.1 | 2,37 Brsk1                   | PSR0700000494.mm.1 | -2,25 | 0,000865 | 0,311909 Cassette Exon       | 0,08 |
| TC0700000038.mm.1 | 2,37 Brsk1                   | PSR0700000501.mm.1 | -2,3  | 0,002552 | 0,349501 Cassette Exon       | 0,12 |
| TC0700000038.mm.1 | 2,37 Brsk1                   | PSR0700000500.mm.1 | -2,87 | 0,002213 | 0,34564 Alternative 5' Donc  | 0,3  |
| TC0700000038.mm.1 | 2,37 Brsk1                   | PSR0700000490.mm.1 | -3    | 0,017982 | 0,466929 Alternative 5' Donc | 0,33 |
| TC0700000038.mm.1 | 2,37 Brsk1                   | PSR0700000479.mm.1 | -3,02 | 0,00263  | 0,349612 Alternative 3' Acce | 0,18 |
| TC0400003559.mm.1 | 1,03 Zmyym1                  | PSR0400029016.mm.1 | 2,99  | 0,03619  | 0,530002 Alternative 5' Donc | 0,32 |
| TC0400003559.mm.1 | 1,03 Zmyym1                  | JUC0400015151.mm.1 | -5,31 | 0,012802 | 0,437296                     |      |
| TC0600000669.mm.1 | -1,4 Gm3279                  | PSR0600005191.mm.1 | 2,99  | 0,005579 | 0,381035 Cassette Exon       | 0,18 |
| TC0400002847.mm.1 | -1,05 Cdk5rap2; Gm11226; Ywh | JUC0400012153.mm.1 | 2,99  | 0,005456 | 0,379939                     |      |
| TC0400002847.mm.1 | -1,05 Cdk5rap2; Gm11226; Ywh | JUC0400012142.mm.1 | 2,43  | 0,006593 | 0,39213                      |      |
| TC0400002847.mm.1 | -1,05 Cdk5rap2; Gm11226; Ywh | JUC0400012125.mm.1 | 2,22  | 0,017284 | 0,463143                     |      |
| TC0400002847.mm.1 | -1,05 Cdk5rap2; Gm11226; Ywh | PSR0400023260.mm.1 | 2,03  | 0,00004  | 0,245341 Cassette Exon       | 0,15 |
| TC0Y00000148.mm.1 | -1,36 Gm21117; Gm21258       | JUC0Y00000436.mm.1 | 2,99  | 0,008259 | 0,405976                     |      |
| TC0Y00000148.mm.1 | -1,36 Gm21117; Gm21258       | PSR0Y00000651.mm.1 | -2,13 | 0,027012 | 0,502979 Cassette Exon       | 0,1  |
| TC0Y00000148.mm.1 | -1,36 Gm21117; Gm21258       | PSR0Y00000660.mm.1 | -2,31 | 0,043488 | 0,549901 Cassette Exon       | 0,11 |
| TC1200000651.mm.1 | -1,5                         | JUC1200002510.mm.1 | 2,99  | 0,038641 | 0,537096                     |      |
| TC0300001193.mm.1 | -1,57 Lrrc39                 | JUC0300005064.mm.1 | 2,99  | 0,030968 | 0,514654                     |      |
| TC0200003528.mm.1 | -1,38 Nmi                    | JUC0200015113.mm.1 | 2,99  | 0,002467 | 0,349135                     |      |
| TC1700001774.mm.1 | -1,02 Stk38; Gm23887         | JUC1700008817.mm.1 | 2,99  | 0,025786 | 0,498505                     |      |
| TC0100001016.mm.1 | -1,1 Zcchc2                  | JUC0100004849.mm.1 | 2,99  | 0,039247 | 0,53893                      |      |
| TC1600001663.mm.1 | 1,46 Tagln3                  | JUC1600007098.mm.1 | 2,99  | 0,00288  | 0,352207                     |      |
| TC0700000410.mm.1 | -1,46 Cic                    | JUC0700001521.mm.1 | 2,99  | 0,016361 | 0,458693                     |      |
| TC1100003965.mm.1 | 2,03 Cacng5                  | JUC1100019439.mm.1 | 2,98  | 0,012095 | 0,43255                      |      |
| TC1100003965.mm.1 | 2,03 Cacng5                  | PSR1100037211.mm.1 | -2,09 | 0,00255  | 0,349501 Cassette Exon       | 0,02 |
| TC1100003965.mm.1 | 2,03 Cacng5                  | JUC1100019441.mm.1 | -2,41 | 0,027252 | 0,503642                     |      |
| TC1100003965.mm.1 | 2,03 Cacng5                  | JUC1100019438.mm.1 | -3,01 | 0,004205 | 0,363236                     |      |
| TC1100003965.mm.1 | 2,03 Cacng5                  | JUC1100019442.mm.1 | -3,12 | 0,000255 | 0,28803                      |      |
| TC1100003965.mm.1 | 2,03 Cacng5                  | PSR1100037202.mm.1 | -3,65 | 0,046116 | 0,555792 Alternative 3' Acce | 0,42 |
| TC0200004556.mm.1 | 3,72 Kcnip3                  | PSR0200039036.mm.1 | 2,98  | 0,020007 | 0,476351 Cassette Exon       | 0,19 |



|                   |                     |                    |       |          |                              |      |
|-------------------|---------------------|--------------------|-------|----------|------------------------------|------|
| TC0200004556.mm.1 | 3,72 Kcnp3          | PSR0200039040.mm.1 | -2,16 | 0,03528  | 0,52837 Cassette Exon        | 0,08 |
| TC0200004556.mm.1 | 3,72 Kcnp3          | PSR0200039029.mm.1 | -2,28 | 0,00488  | 0,372195 Alternative 3' Acce | 0,2  |
| TC0200004556.mm.1 | 3,72 Kcnp3          | PSR0200039038.mm.1 | -3,33 | 0,011151 | 0,42626 Cassette Exon        | 0,32 |
| TC0200004556.mm.1 | 3,72 Kcnp3          | JUC0200020209.mm.1 | -3,55 | 0,0124   | 0,434948                     |      |
| TC1400001914.mm.1 | -2,58 Bmp4          | PSR1400014472.mm.1 | 2,98  | 0,044144 | 0,551024 Alternative 5' Donc | 0,3  |
| TC1200000173.mm.1 | -1,08               | JUC1200000774.mm.1 | 2,98  | 0,007893 | 0,403819                     |      |
| TC1200000173.mm.1 | -1,08               | PSR1200001366.mm.1 | 2,67  | 0,001517 | 0,330268 Cassette Exon       | 0,27 |
| TC1200000173.mm.1 | -1,08               | JUC1200000775.mm.1 | 2,65  | 0,009925 | 0,418378                     |      |
| TC0500000670.mm.1 | -2,52 Atp10d        | PSR0500005910.mm.1 | 2,98  | 0,006337 | 0,389463 Cassette Exon       | 0,26 |
| TC0500000670.mm.1 | -2,52 Atp10d        | JUC0500003250.mm.1 | 2,77  | 0,006158 | 0,387873                     |      |
| TC0500000670.mm.1 | -2,52 Atp10d        | PSR0500005909.mm.1 | 2,58  | 0,002224 | 0,345773 Cassette Exon       | 0,24 |
| TC0500000670.mm.1 | -2,52 Atp10d        | JUC0500003271.mm.1 | 2,41  | 0,031947 | 0,518113                     |      |
| TC0700003031.mm.1 | 1,19 Abcc8          | PSR0700027601.mm.1 | 2,98  | 0,001439 | 0,32773 Cassette Exon        | 0,22 |
| TC0X00000618.mm.1 | -1 Aff2             | PSR0X00003915.mm.1 | 2,98  | 0,025541 | 0,497789 Cassette Exon       | 0,19 |
| TC1600000344.mm.1 | -1,93 LOC102633188  | PSR1600003423.mm.1 | 2,98  | 0,019795 | 0,475212 Cassette Exon       | 0,18 |
| TC0100001434.mm.1 | -1,16 Sec16b        | JUC0100006731.mm.1 | 2,98  | 0,004934 | 0,373093                     |      |
| TC1400002753.mm.1 | -1,24 2610035F20Rik | JUC1400011331.mm.1 | 2,98  | 0,012666 | 0,43631                      |      |
| TC1500000604.mm.1 | 1,29 Ppp1r16a       | JUC1500002528.mm.1 | 2,98  | 0,020668 | 0,478862                     |      |
| TC0900001670.mm.1 | -1,36 Ccr9; Gm17200 | JUC0900007905.mm.1 | 2,98  | 0,023254 | 0,490032                     |      |
| TC0900001462.mm.1 | 1,01 Kif9           | JUC0900006798.mm.1 | 2,98  | 0,015287 | 0,453287                     |      |
| TC0500001130.mm.1 | 1,09 Plcx1          | JUC0500005233.mm.1 | 2,98  | 0,0011   | 0,317328                     |      |
| TC0500001130.mm.1 | 1,09 Plcx1          | JUC0500005237.mm.1 | 2,03  | 0,000953 | 0,313363                     |      |
| TC0700003448.mm.1 | -1,23 Lrrc28        | JUC0700015535.mm.1 | 2,98  | 0,034565 | 0,525975                     |      |
| TC0400000185.mm.1 | -1,02 Coq3          | JUC0400000598.mm.1 | 2,98  | 0,029151 | 0,509333                     |      |
| TC1000001743.mm.1 | -1,59 Adgb          | JUC1000006878.mm.1 | 2,98  | 0,003866 | 0,358861                     |      |
| TC1000001743.mm.1 | -1,59 Adgb          | JUC1000006863.mm.1 | 2,74  | 0,004578 | 0,369794                     |      |
| TC1000001743.mm.1 | -1,59 Adgb          | JUC1000006872.mm.1 | 2,64  | 0,043716 | 0,550256                     |      |
| TC1000001743.mm.1 | -1,59 Adgb          | JUC1000006851.mm.1 | 2,21  | 0,005783 | 0,383104                     |      |
| TC1000001743.mm.1 | -1,59 Adgb          | JUC1000006853.mm.1 | -2,05 | 0,007327 | 0,399002                     |      |
| TC1000001743.mm.1 | -1,59 Adgb          | JUC1000006870.mm.1 | -2,41 | 0,00044  | 0,297771                     |      |
| TC1000001336.mm.1 | -2 Ptprb            | JUC1000005415.mm.1 | 2,98  | 0,005131 | 0,376377                     |      |
| TC0300001490.mm.1 | -1,24 Lpar3         | JUC0300006360.mm.1 | 2,98  | 0,001703 | 0,335511                     |      |
| TC0900002236.mm.1 | -1,08 Rbm7          | PSR0900018661.mm.1 | 2,97  | 0,017032 | 0,461729 Intron Retention    | 0,36 |
| TC0900002236.mm.1 | -1,08 Rbm7          | JUC0900010510.mm.1 | 2,05  | 0,032562 | 0,520128                     |      |
| TC1400001253.mm.1 | 1,07 Gpc6           | PSR1400009608.mm.1 | 2,97  | 0,006067 | 0,386691 Cassette Exon       | 0,28 |
| TC1400001253.mm.1 | 1,07 Gpc6           | JUC1400005120.mm.1 | -2,29 | 0,046697 | 0,556856                     |      |
| TC0300002743.mm.1 | 1,27 5330417C22Rik  | JUC0300011247.mm.1 | 2,97  | 0,005358 | 0,378582                     |      |
| TC0300002743.mm.1 | 1,27 5330417C22Rik  | PSR0300021586.mm.1 | -2,32 | 0,026085 | 0,499688 Cassette Exon       | 0,1  |
| TC0300002743.mm.1 | 1,27 5330417C22Rik  | PSR0300021592.mm.1 | -2,34 | 0,02107  | 0,480303 Alternative 5' Donc | 0,23 |
| TC0200004312.mm.1 | 1,55 Ano3           | JUC0200018441.mm.1 | 2,97  | 0,048719 | 0,561355                     |      |
| TC0200004312.mm.1 | 1,55 Ano3           | JUC0200018436.mm.1 | 2,47  | 0,005215 | 0,377078                     |      |
| TC0200004312.mm.1 | 1,55 Ano3           | PSR0200036126.mm.1 | -2,16 | 0,020656 | 0,478862 Cassette Exon       | 0,13 |
| TC0200004312.mm.1 | 1,55 Ano3           | JUC0200018444.mm.1 | -2,21 | 0,008464 | 0,406624                     |      |
| TC0200004312.mm.1 | 1,55 Ano3           | PSR0200036123.mm.1 | -2,25 | 0,007584 | 0,40171 Cassette Exon        | 0,14 |
| TC0200004312.mm.1 | 1,55 Ano3           | PSR0200036125.mm.1 | -2,27 | 0,026676 | 0,501977 Cassette Exon       | 0,13 |
| TC0200004312.mm.1 | 1,55 Ano3           | JUC0200018447.mm.1 | -3,95 | 0,001075 | 0,316759                     |      |
| TC0700003770.mm.1 | -1,03 Myo7a         | JUC0700016772.mm.1 | 2,97  | 0,017382 | 0,463704                     |      |
| TC0700003770.mm.1 | -1,03 Myo7a         | PSR0700031724.mm.1 | -2,25 | 0,013244 | 0,441395 Alternative 3' Acce | 0,14 |

|                   |                                |                    |       |          |                              |      |
|-------------------|--------------------------------|--------------------|-------|----------|------------------------------|------|
| TC1900000206.mm.1 | -1,09 Vwce                     | JUC1900001348.mm.1 | 2,97  | 0,038974 | 0,53792                      |      |
| TC1500002109.mm.1 | -1,04 Adamts20                 | JUC1500009644.mm.1 | 2,97  | 0,049735 | 0,563552                     |      |
| TC1500002109.mm.1 | -1,04 Adamts20                 | PSR1500016948.mm.1 | -2,12 | 0,015379 | 0,453849                     |      |
| TC0200000427.mm.1 | -1,1 Lcn8                      | JUC0200001216.mm.1 | 2,97  | 0,028775 | 0,508148                     |      |
| TC0500001911.mm.1 | 1,16 A330021E22Rik             | JUC0500009575.mm.1 | 2,97  | 0,003114 | 0,353892                     |      |
| TC0500001911.mm.1 | 1,16 A330021E22Rik             | JUC0500009584.mm.1 | -3,25 | 0,000536 | 0,304044                     |      |
| TC0300001645.mm.1 | -1,24 Zfand1                   | JUC0300006930.mm.1 | 2,97  | 0,033043 | 0,521532                     |      |
| TC0300001645.mm.1 | -1,24 Zfand1                   | JUC0300006934.mm.1 | 2,42  | 0,02676  | 0,502096                     |      |
| TC0X00000426.mm.1 | -1,47 Xpnpep2                  | JUC0X00001415.mm.1 | 2,97  | 0,000437 | 0,297771                     |      |
| TC0900002870.mm.1 | 1,33 Pls1                      | JUC0900013225.mm.1 | 2,97  | 0,001848 | 0,337414                     |      |
| TC1900000417.mm.1 | 7,08 Kcnv2                     | JUC1900002027.mm.1 | 2,96  | 0,02127  | 0,481596                     |      |
| TC1900000417.mm.1 | 7,08 Kcnv2                     | PSR1900003899.mm.1 | -3,58 | 0,025504 | 0,497664 Alternative 3' Acce | 0,41 |
| TC0200000477.mm.1 | -1,05 Rxra                     | PSR0200003231.mm.1 | 2,96  | 0,024788 | 0,495082 Cassette Exon       | 0,18 |
| TC1000001228.mm.1 | 1,77 Mgat4c; 4930402119Rik     | JUC1000005012.mm.1 | 2,96  | 0,007665 | 0,402377                     |      |
| TC1000001228.mm.1 | 1,77 Mgat4c; 4930402119Rik     | PSR1000009278.mm.1 | -2,05 | 0,013123 | 0,439932 Alternative 5' Donc | 0,15 |
| TC1000001228.mm.1 | 1,77 Mgat4c; 4930402119Rik     | PSR1000009287.mm.1 | -2,05 | 0,033278 | 0,522358 Cassette Exon       | 0,07 |
| TC1000001228.mm.1 | 1,77 Mgat4c; 4930402119Rik     | JUC1000005018.mm.1 | -2,22 | 0,03988  | 0,54093                      |      |
| TC1000001228.mm.1 | 1,77 Mgat4c; 4930402119Rik     | PSR1000009279.mm.1 | -2,23 | 0,047687 | 0,558901 Alternative 5' Donc | 0,15 |
| TC1000001228.mm.1 | 1,77 Mgat4c; 4930402119Rik     | PSR1000009283.mm.1 | -2,32 | 0,022872 | 0,488524 Cassette Exon       | 0,12 |
| TC1000001228.mm.1 | 1,77 Mgat4c; 4930402119Rik     | PSR1000009273.mm.1 | -2,45 | 0,037869 | 0,534872 Alternative 3' Acce | 0,16 |
| TC1000001228.mm.1 | 1,77 Mgat4c; 4930402119Rik     | PSR1000009272.mm.1 | -3,05 | 0,015384 | 0,453849 Cassette Exon       | 0,16 |
| TC1000001228.mm.1 | 1,77 Mgat4c; 4930402119Rik     | JUC1000005020.mm.1 | -3,26 | 0,008146 | 0,405457                     |      |
| TC0400001758.mm.1 | 1,48 Gm13029                   | PSR0400014527.mm.1 | 2,96  | 0,004847 | 0,37168 Cassette Exon        | 0,05 |
| TC0400001758.mm.1 | 1,48 Gm13029                   | JUC0400007638.mm.1 | -8,53 | 0,024388 | 0,493641                     |      |
| TC1400002027.mm.1 | 1,51 Chd8                      | JUC1400008333.mm.1 | 2,96  | 0,036396 | 0,530877                     |      |
| TC0300000639.mm.1 | -1,39 Rbm46os; 4930564K09Rik   | JUC0300002198.mm.1 | 2,96  | 0,044666 | 0,55216                      |      |
| TC0300000639.mm.1 | -1,39 Rbm46os; 4930564K09Rik   | JUC0300002205.mm.1 | 2,43  | 0,018873 | 0,4711                       |      |
| TC0300000631.mm.1 | -1,27 Pdgfc                    | JUC0300002154.mm.1 | 2,96  | 0,002697 | 0,349612                     |      |
| TC0200003837.mm.1 | -1,08 Nckap1                   | JUC0200017175.mm.1 | 2,96  | 0,033686 | 0,523549                     |      |
| TC0700004487.mm.1 | 1,15 Adam8                     | JUC0700019866.mm.1 | 2,96  | 0,009996 | 0,418456                     |      |
| TC1100000565.mm.1 | 1,09 Clk4; Gm25082             | JUC1100002256.mm.1 | 2,96  | 0,032149 | 0,518586                     |      |
| TC1000001542.mm.1 | -1,47 Ctdsp2; Mir26a-2; Mir546 | PSR1000010862.mm.1 | 2,96  | 0,003006 | 0,353447                     |      |
| TC1100002988.mm.1 | -1,28 Map2k4                   | JUC1100014121.mm.1 | 2,96  | 0,013558 | 0,443655                     |      |
| TC0900001012.mm.1 | 8,28 Gnb5                      | JUC0900004334.mm.1 | 2,95  | 0,006572 | 0,39213                      |      |
| TC0900001012.mm.1 | 8,28 Gnb5                      | JUC0900004335.mm.1 | 2,26  | 0,004538 | 0,368648                     |      |
| TC0900001012.mm.1 | 8,28 Gnb5                      | JUC0900004336.mm.1 | 2,06  | 0,02356  | 0,490947                     |      |
| TC0900001012.mm.1 | 8,28 Gnb5                      | PSR0900008004.mm.1 | -2,03 | 0,028154 | 0,506347 Alternative 5' Donc | 0,13 |
| TC0900001012.mm.1 | 8,28 Gnb5                      | PSR0900007992.mm.1 | -2,83 | 0,004737 | 0,370933 Cassette Exon       | 0,39 |
| TC0900001012.mm.1 | 8,28 Gnb5                      | JUC0900004345.mm.1 | -6,98 | 0,014949 | 0,451968                     |      |
| TC0900001012.mm.1 | 8,28 Gnb5                      | PSR0900007989.mm.1 | -7,2  | 0,005624 | 0,381314 Alternative 3' Acce | 0,44 |
| TC0900001012.mm.1 | 8,28 Gnb5                      | PSR0900007985.mm.1 | -9,15 | 0,000205 | 0,28803 Cassette Exon        | 0,28 |
| TC0200000929.mm.1 | 3,58 Slc4a10                   | JUC0200003794.mm.1 | 2,95  | 0,010945 | 0,425002                     |      |
| TC0200000929.mm.1 | 3,58 Slc4a10                   | JUC0200003798.mm.1 | 2,44  | 0,009865 | 0,417945                     |      |
| TC0200000929.mm.1 | 3,58 Slc4a10                   | PSR0200007464.mm.1 | 2,37  | 0,019228 | 0,472971 Cassette Exon       | 0,14 |
| TC0200000929.mm.1 | 3,58 Slc4a10                   | JUC0200003803.mm.1 | 2,07  | 0,008591 | 0,408237                     |      |
| TC0200000929.mm.1 | 3,58 Slc4a10                   | PSR0200007450.mm.1 | -2,02 | 0,013949 | 0,446234 Cassette Exon       | 0,19 |
| TC0200000929.mm.1 | 3,58 Slc4a10                   | PSR0200007459.mm.1 | -2,24 | 0,012778 | 0,437233 Cassette Exon       | 0,15 |
| TC0200000929.mm.1 | 3,58 Slc4a10                   | PSR0200007455.mm.1 | -2,37 | 0,011061 | 0,425887 Cassette Exon       | 0,35 |

|                   |                            |                    |       |          |                              |      |
|-------------------|----------------------------|--------------------|-------|----------|------------------------------|------|
| TC0200000929.mm.1 | 3,58 Slc4a10               | PSR0200007443.mm.1 | -2,53 | 0,004362 | 0,365487 Cassette Exon       | 0,22 |
| TC0200000929.mm.1 | 3,58 Slc4a10               | JUC0200003801.mm.1 | -2,76 | 0,034229 | 0,525168                     |      |
| TC0200000929.mm.1 | 3,58 Slc4a10               | PSR0200007461.mm.1 | -2,83 | 0,046262 | 0,556176 Alternative 3' Acce | 0,18 |
| TC0200000929.mm.1 | 3,58 Slc4a10               | PSR0200007444.mm.1 | -2,89 | 0,007258 | 0,39826 Cassette Exon        | 0,22 |
| TC0200000929.mm.1 | 3,58 Slc4a10               | JUC0200003808.mm.1 | -3,04 | 0,029908 | 0,511464                     |      |
| TC0200000929.mm.1 | 3,58 Slc4a10               | PSR0200007446.mm.1 | -3,16 | 0,021974 | 0,485125 Cassette Exon       | 0,38 |
| TC0200000929.mm.1 | 3,58 Slc4a10               | JUC0200003813.mm.1 | -3,4  | 0,040877 | 0,543423                     |      |
| TC0200000929.mm.1 | 3,58 Slc4a10               | PSR0200007441.mm.1 | -4,2  | 0,008041 | 0,40434 Alternative 3' Acce  | 0,23 |
| TC0200000929.mm.1 | 3,58 Slc4a10               | PSR0200007440.mm.1 | -4,22 | 0,007801 | 0,403089 Alternative 3' Acce | 0,23 |
| TC0200000929.mm.1 | 3,58 Slc4a10               | JUC0200003814.mm.1 | -4,59 | 0,011684 | 0,429961                     |      |
| TC0200000929.mm.1 | 3,58 Slc4a10               | JUC0200003800.mm.1 | -5,01 | 0,019484 | 0,474383                     |      |
| TC0200000929.mm.1 | 3,58 Slc4a10               | JUC0200003809.mm.1 | -5,33 | 0,037681 | 0,534394                     |      |
| TC0200000929.mm.1 | 3,58 Slc4a10               | JUC0200003806.mm.1 | -6,46 | 0,022186 | 0,485756                     |      |
| TC0400001683.mm.1 | 1,25 Hnrnpr; 9130020K20Rik | PSR0400013548.mm.1 | 2,95  | 0,037839 | 0,534803 Alternative 3' Acce | 0,31 |
| TC0200004594.mm.1 | 6,05 Al847159              | JUC0200020394.mm.1 | 2,95  | 0,048872 | 0,561713                     |      |
| TC0200004594.mm.1 | 6,05 Al847159              | PSR0200039359.mm.1 | 2,05  | 0,008658 | 0,408463                     |      |
| TC0200004594.mm.1 | 6,05 Al847159              | PSR0200039365.mm.1 | -4,82 | 0,035989 | 0,529491 Cassette Exon       | 0,28 |
| TC0200004594.mm.1 | 6,05 Al847159              | JUC0200020395.mm.1 | -5,3  | 0,016313 | 0,45857                      |      |
| TC0200004594.mm.1 | 6,05 Al847159              | JUC0200020397.mm.1 | -6,73 | 0,005608 | 0,381115                     |      |
| TC0200004594.mm.1 | 6,05 Al847159              | PSR0200039353.mm.1 | -6,82 | 0,003357 | 0,354243 Cassette Exon       | 0,28 |
| TC0200004594.mm.1 | 6,05 Al847159              | PSR0200039366.mm.1 | -8,58 | 0,01564  | 0,455245 Cassette Exon       | 0,28 |
| TC0500001451.mm.1 | -1,43 Atp6v0a2             | JUC0500007149.mm.1 | 2,95  | 0,040817 | 0,543269                     |      |
| TC0500001451.mm.1 | -1,43 Atp6v0a2             | JUC0500007159.mm.1 | 2,85  | 0,025447 | 0,497549                     |      |
| TC0500001451.mm.1 | -1,43 Atp6v0a2             | JUC0500007154.mm.1 | 2,73  | 0,035864 | 0,529376                     |      |
| TC0500001451.mm.1 | -1,43 Atp6v0a2             | PSR0500013072.mm.1 | 2,3   | 0,016803 | 0,460623 Cassette Exon       | 0,22 |
| TC0500001451.mm.1 | -1,43 Atp6v0a2             | PSR0500013083.mm.1 | 2,1   | 0,048212 | 0,560209 Cassette Exon       | 0,18 |
| TC1100003736.mm.1 | -2,16 Krtap4-8             | PSR1100034339.mm.1 | 2,95  | 0,001786 | 0,336311 Cassette Exon       | 0,18 |
| TC1100002921.mm.1 | -1,25 Ulk2                 | JUC1100013889.mm.1 | 2,95  | 0,032877 | 0,521147                     |      |
| TC1100002921.mm.1 | -1,25 Ulk2                 | PSR1100026616.mm.1 | 2,07  | 0,005662 | 0,381922 Cassette Exon       | 0,13 |
| TC1100002921.mm.1 | -1,25 Ulk2                 | JUC1100013883.mm.1 | 2,07  | 0,009197 | 0,413763                     |      |
| TC0100000053.mm.1 | -1,02                      | JUC0100000258.mm.1 | 2,95  | 0,02498  | 0,496025                     |      |
| TC1500002147.mm.1 | -1,38 Slc38a4              | JUC1500009810.mm.1 | 2,95  | 0,010326 | 0,420743                     |      |
| TC1600001259.mm.1 | 1,17 Dnm1l                 | JUC1600005297.mm.1 | 2,95  | 0,00635  | 0,389463                     |      |
| TC0500002846.mm.1 | 1,15 Fam175a               | JUC0500013659.mm.1 | 2,95  | 0,024503 | 0,493992                     |      |
| TC0700000147.mm.1 | 1,44 Zfp110                | JUC0700000532.mm.1 | 2,95  | 0,015786 | 0,455641                     |      |
| TC0600003020.mm.1 | -1,15 Erc1                 | JUC0600012153.mm.1 | 2,95  | 0,008267 | 0,405976                     |      |
| TC0700002472.mm.1 | -1,18 Gipr                 | JUC0700011593.mm.1 | 2,95  | 0,000593 | 0,304044                     |      |
| TC0300001314.mm.1 | -1,02 Pla2g12a             | JUC0300005544.mm.1 | 2,95  | 0,035956 | 0,529431                     |      |
| TC0300001508.mm.1 | -1,51                      | JUC0300006441.mm.1 | 2,95  | 0,005588 | 0,381035                     |      |
| TC0Y00000283.mm.1 | -1,28 Gm20736              | JUC0Y00001178.mm.1 | 2,95  | 0,016073 | 0,457489                     |      |
| TC1700002802.mm.1 | 2,59 Rhot2                 | PSR1700015405.mm.1 | 2,94  | 0,015744 | 0,455416 Cassette Exon       | 0,19 |
| TC1700002802.mm.1 | 2,59 Rhot2                 | PSR1700015406.mm.1 | 2,42  | 0,024337 | 0,49362 Cassette Exon        | 0,14 |
| TC1700002802.mm.1 | 2,59 Rhot2                 | JUC1700008354.mm.1 | -2,65 | 0,007557 | 0,401384                     |      |
| TC1700002802.mm.1 | 2,59 Rhot2                 | PSR1700015370.mm.1 | -2,99 | 0,037783 | 0,534693 Intron Retention    | 0,33 |
| TC1700002802.mm.1 | 2,59 Rhot2                 | PSR1700015382.mm.1 | -3,68 | 0,007872 | 0,403545 Alternative 3' Acce | 0,42 |
| TC1700002802.mm.1 | 2,59 Rhot2                 | JUC1700008373.mm.1 | -4,34 | 0,00596  | 0,385397                     |      |
| TC1100001157.mm.1 | -1,08 Pigs                 | PSR1100010772.mm.1 | 2,94  | 0,019695 | 0,474887 Alternative 3' Acce | 0,34 |
| TC1100001157.mm.1 | -1,08 Pigs                 | PSR1100010777.mm.1 | 2,16  | 0,005397 | 0,378916 Intron Retention    | 0,25 |

|                   |                             |                    |       |          |                              |      |
|-------------------|-----------------------------|--------------------|-------|----------|------------------------------|------|
| TC1100001157.mm.1 | -1,08 Pigs                  | PSR1100010768.mm.1 | 2,13  | 0,003558 | 0,356223 Intron Retention    | 0,28 |
| TC0400001695.mm.1 | 3,63 Lactbl1                | JUC0400007040.mm.1 | 2,94  | 0,021825 | 0,484607                     |      |
| TC0400001695.mm.1 | 3,63 Lactbl1                | PSR0400013625.mm.1 | 2,22  | 0,008435 | 0,406611 Cassette Exon       | 0,21 |
| TC0400001695.mm.1 | 3,63 Lactbl1                | JUC0400007038.mm.1 | 2,02  | 0,003625 | 0,356444                     |      |
| TC0400001695.mm.1 | 3,63 Lactbl1                | PSR0400013628.mm.1 | -2,08 | 0,027001 | 0,502911 Cassette Exon       | 0,12 |
| TC0400001695.mm.1 | 3,63 Lactbl1                | PSR0400013627.mm.1 | -2,92 | 0,000909 | 0,313363 Cassette Exon       | 0,31 |
| TC0400001695.mm.1 | 3,63 Lactbl1                | JUC0400007037.mm.1 | -3,05 | 0,000109 | 0,267977                     |      |
| TC0400001695.mm.1 | 3,63 Lactbl1                | JUC0400007041.mm.1 | -3,49 | 0,002405 | 0,348653                     |      |
| TC0500002676.mm.1 | -1,67 Uba6                  | PSR0500023584.mm.1 | 2,94  | 0,048098 | 0,559875 Alternative 5' Donc | 0,28 |
| TC0500001221.mm.1 | -1,24 Acacb                 | JUC0500005692.mm.1 | 2,94  | 0,030891 | 0,514574                     |      |
| TC0500001221.mm.1 | -1,24 Acacb                 | PSR0500010371.mm.1 | -2,11 | 0,047066 | 0,557783 Cassette Exon       | 0,12 |
| TC0200003654.mm.1 | -1,01 Grb14                 | JUC0200015800.mm.1 | 2,94  | 0,014994 | 0,452052                     |      |
| TC1900001619.mm.1 | 1,1 Pcgf6                   | JUC1900007957.mm.1 | 2,94  | 0,048251 | 0,560279                     |      |
| TC0200002270.mm.1 | -1,03 Angpt4                | JUC0200008922.mm.1 | 2,94  | 0,008267 | 0,405976                     |      |
| TC1600001556.mm.1 | -1,38 Parp14                | JUC1600006655.mm.1 | 2,94  | 0,02419  | 0,493294                     |      |
| TC0800001861.mm.1 | -1 Nek5                     | JUC0800007994.mm.1 | 2,94  | 0,039879 | 0,54093                      |      |
| TC0900000351.mm.1 | 1,39 Fez1                   | JUC0900001406.mm.1 | 2,94  | 0,049735 | 0,563552                     |      |
| TC1100000935.mm.1 | 1,16 Phf23                  | JUC1100004224.mm.1 | 2,94  | 0,033915 | 0,52424                      |      |
| TC1100000935.mm.1 | 1,16 Phf23                  | JUC1100004228.mm.1 | -5,13 | 0,049539 | 0,563325                     |      |
| TC1000001597.mm.1 | 1,3 Pan2                    | JUC1000006298.mm.1 | 2,94  | 0,00168  | 0,335182                     |      |
| TC1100001579.mm.1 | -1,14 Csf3                  | JUC1100007631.mm.1 | 2,94  | 0,005893 | 0,383835                     |      |
| TC0900002095.mm.1 | 2,94 Gramd1b                | JUC0900009721.mm.1 | 2,93  | 0,011385 | 0,427549                     |      |
| TC0900002095.mm.1 | 2,94 Gramd1b                | PSR0900017325.mm.1 | -2,13 | 0,030672 | 0,51384 Alternative 5' Donc  | 0,18 |
| TC0900002095.mm.1 | 2,94 Gramd1b                | PSR0900017322.mm.1 | -2,23 | 0,041353 | 0,54446 Cassette Exon        | 0,01 |
| TC0900002095.mm.1 | 2,94 Gramd1b                | JUC0900009737.mm.1 | -3,24 | 0,006016 | 0,386586                     |      |
| TC0900002095.mm.1 | 2,94 Gramd1b                | JUC0900009733.mm.1 | -3,31 | 0,009641 | 0,417354                     |      |
| TC0900002095.mm.1 | 2,94 Gramd1b                | PSR0900017327.mm.1 | -4,19 | 0,009782 | 0,417839 Cassette Exon       | 0,3  |
| TC0900002095.mm.1 | 2,94 Gramd1b                | PSR0900017329.mm.1 | -4,46 | 0,033697 | 0,523549 Cassette Exon       | 0,44 |
| TC0900002095.mm.1 | 2,94 Gramd1b                | JUC0900009743.mm.1 | -4,89 | 0,004697 | 0,370559                     |      |
| TC0900002095.mm.1 | 2,94 Gramd1b                | JUC0900009744.mm.1 | -5,46 | 0,001868 | 0,337974                     |      |
| TC0900002095.mm.1 | 2,94 Gramd1b                | JUC0900009735.mm.1 | -6,77 | 0,000125 | 0,270905                     |      |
| TC0500001898.mm.1 | 2,68 Cdk14                  | JUC0500009511.mm.1 | 2,93  | 0,002281 | 0,34605                      |      |
| TC0500001898.mm.1 | 2,68 Cdk14                  | PSR0500017489.mm.1 | 2,4   | 0,000153 | 0,272178 Alternative 3' Acce | 0,17 |
| TC0500001898.mm.1 | 2,68 Cdk14                  | PSR0500017502.mm.1 | -2,54 | 0,041484 | 0,544745 Cassette Exon       | 0,18 |
| TC0500001898.mm.1 | 2,68 Cdk14                  | PSR0500017473.mm.1 | -2,66 | 0,013082 | 0,4396 Alternative 3' Acce   | 0,25 |
| TC0500001898.mm.1 | 2,68 Cdk14                  | JUC0500009518.mm.1 | -2,91 | 0,048087 | 0,55985                      |      |
| TC0500001898.mm.1 | 2,68 Cdk14                  | PSR0500017499.mm.1 | -2,92 | 0,012037 | 0,432286 Cassette Exon       | 0,2  |
| TC0500001898.mm.1 | 2,68 Cdk14                  | JUC0500009512.mm.1 | -4,58 | 0,012043 | 0,432309                     |      |
| TC0900000180.mm.1 | 2,95 Rdh8                   | JUC0900000547.mm.1 | 2,93  | 0,0029   | 0,352207                     |      |
| TC0900000180.mm.1 | 2,95 Rdh8                   | PSR0900001124.mm.1 | 2,72  | 0,003749 | 0,357586 Cassette Exon       | 0,19 |
| TC0900000180.mm.1 | 2,95 Rdh8                   | JUC0900000550.mm.1 | 2,24  | 0,006432 | 0,389972                     |      |
| TC0900000180.mm.1 | 2,95 Rdh8                   | PSR0900001123.mm.1 | 2,12  | 0,011127 | 0,426023 Cassette Exon       | 0,23 |
| TC0200004368.mm.1 | 3,39 Gjd2                   | PSR0200036492.mm.1 | 2,93  | 0,008113 | 0,405267 Cassette Exon       | 0,15 |
| TC0200004368.mm.1 | 3,39 Gjd2                   | PSR0200036493.mm.1 | -2,93 | 0,008113 | 0,405267 Cassette Exon       | 0,21 |
| TC0Y00000203.mm.1 | -1,26 Gm20916; Gm21627; Gm2 | JUC0Y00000771.mm.1 | 2,93  | 0,027936 | 0,505612                     |      |
| TC0Y00000203.mm.1 | -1,26 Gm20916; Gm21627; Gm2 | PSR0Y00001065.mm.1 | -3,14 | 0,027498 | 0,504313 Cassette Exon       | 0,19 |
| TC1200002438.mm.1 | -1,41 Ahnak2                | PSR1200016938.mm.1 | 2,93  | 0,0458   | 0,554863 Cassette Exon       | 0,18 |
| TC1200002438.mm.1 | -1,41 Ahnak2                | PSR1200016924.mm.1 | 2,22  | 0,001986 | 0,341091 Cassette Exon       | 0,11 |

|                   |                              |                    |       |          |                              |      |
|-------------------|------------------------------|--------------------|-------|----------|------------------------------|------|
| TC1200002438.mm.1 | -1,41 Ahnak2                 | PSR1200016928.mm.1 | 2,09  | 0,018121 | 0,467204                     |      |
| TC0800003233.mm.1 | 1,21 Trmt1                   | PSR0800007200.mm.1 | 2,93  | 0,003635 | 0,3566 Intron Retention      | 0,16 |
| TC0800003233.mm.1 | 1,21 Trmt1                   | JUC0800003836.mm.1 | 2,36  | 0,02195  | 0,485095                     |      |
| TC1000002645.mm.1 | -1,47 Chpt1                  | JUC1000010951.mm.1 | 2,93  | 0,007261 | 0,39826                      |      |
| TC1000002645.mm.1 | -1,47 Chpt1                  | JUC1000010949.mm.1 | 2,36  | 0,026064 | 0,499627                     |      |
| TC1000002645.mm.1 | -1,47 Chpt1                  | PSR1000020010.mm.1 | 2,35  | 0,042273 | 0,547092 Cassette Exon       | 0,1  |
| TC0200002834.mm.1 | 1,03 Opr1                    | JUC0200011882.mm.1 | 2,93  | 0,003918 | 0,359788                     |      |
| TC0300000411.mm.1 | 1,09 Supt20                  | JUC0300001461.mm.1 | 2,93  | 0,00089  | 0,313363                     |      |
| TC0300000411.mm.1 | 1,09 Supt20                  | JUC0300001492.mm.1 | -2,7  | 0,029273 | 0,509873                     |      |
| TC1100003831.mm.1 | 1,15 Ubtf                    | JUC1100018631.mm.1 | 2,93  | 0,012975 | 0,439245                     |      |
| TC0500001597.mm.1 | 1,32 Rasa4; Mir7035; mmu-mir | JUC0500007870.mm.1 | 2,93  | 0,037721 | 0,534622                     |      |
| TC0500001597.mm.1 | 1,32 Rasa4; Mir7035; mmu-mir | PSR0500014445.mm.1 | 2,04  | 0,006402 | 0,38966                      |      |
| TC0500001597.mm.1 | 1,32 Rasa4; Mir7035; mmu-mir | JUC0500007892.mm.1 | -2,66 | 0,018158 | 0,467432                     |      |
| TC0700000990.mm.1 | 1,05 Vimp                    | JUC0700004669.mm.1 | 2,93  | 0,046227 | 0,556056                     |      |
| TC0400001180.mm.1 | 1,16 Agbl4                   | JUC0400004428.mm.1 | 2,93  | 0,01346  | 0,442805                     |      |
| TC0400001116.mm.1 | -1,02 Ssbp3                  | JUC0400003974.mm.1 | 2,93  | 0,024485 | 0,493992                     |      |
| TC0300001427.mm.1 | 1,02 Stpg2                   | JUC0300006051.mm.1 | 2,93  | 0,007531 | 0,40125                      |      |
| TC1100002255.mm.1 | 1,02 Etaa1                   | JUC1100011391.mm.1 | 2,93  | 0,016768 | 0,460504                     |      |
| TC0400001453.mm.1 | 1,1 Stk40                    | JUC0400005770.mm.1 | 2,93  | 0,027931 | 0,505612                     |      |
| TC1800001088.mm.1 | 3,54 Celf4                   | PSR1800008017.mm.1 | 2,92  | 0,001061 | 0,316361                     |      |
| TC1800001088.mm.1 | 3,54 Celf4                   | JUC1800004464.mm.1 | 2,73  | 0,005485 | 0,379939                     |      |
| TC1800001088.mm.1 | 3,54 Celf4                   | PSR1800008006.mm.1 | 2,32  | 0,018427 | 0,468598 Cassette Exon       | 0,11 |
| TC1800001088.mm.1 | 3,54 Celf4                   | JUC1800004454.mm.1 | 2,24  | 0,000649 | 0,304044                     |      |
| TC1800001088.mm.1 | 3,54 Celf4                   | JUC1800004468.mm.1 | -3,68 | 0,044656 | 0,552129                     |      |
| TC1800001088.mm.1 | 3,54 Celf4                   | PSR1800008022.mm.1 | -3,69 | 0,021552 | 0,483034 Cassette Exon       | 0,17 |
| TC1800001088.mm.1 | 3,54 Celf4                   | JUC1800004456.mm.1 | -3,79 | 0,010009 | 0,418602                     |      |
| TC1800001088.mm.1 | 3,54 Celf4                   | JUC1800004470.mm.1 | -3,84 | 0,0181   | 0,467161                     |      |
| TC1800001088.mm.1 | 3,54 Celf4                   | PSR1800008012.mm.1 | -4,06 | 0,008867 | 0,410539 Cassette Exon       | 0,55 |
| TC1800001088.mm.1 | 3,54 Celf4                   | JUC1800004457.mm.1 | -4,5  | 0,001304 | 0,323504                     |      |
| TC1800001088.mm.1 | 3,54 Celf4                   | JUC1800004462.mm.1 | -4,67 | 0,009635 | 0,417354                     |      |
| TC1800001088.mm.1 | 3,54 Celf4                   | JUC1800004460.mm.1 | -5,06 | 0,034962 | 0,52724                      |      |
| TC1800001088.mm.1 | 3,54 Celf4                   | JUC1800004466.mm.1 | -5,29 | 0,00767  | 0,402377                     |      |
| TC1800001088.mm.1 | 3,54 Celf4                   | PSR1800008020.mm.1 | -7,11 | 0,00295  | 0,352501 Alternative 3' Acce | 0,41 |
| TC1800001088.mm.1 | 3,54 Celf4                   | JUC1800004467.mm.1 | -8,19 | 0,003474 | 0,355628                     |      |
| TC1800001088.mm.1 | 3,54 Celf4                   | JUC1800004465.mm.1 | -9,46 | 0,01232  | 0,434392                     |      |
| TC0200003300.mm.1 | 6,61 Dnm1                    | JUC0200014145.mm.1 | 2,92  | 0,003895 | 0,359372                     |      |
| TC0200003300.mm.1 | 6,61 Dnm1                    | PSR0200028056.mm.1 | 2,43  | 0,00953  | 0,416602 Cassette Exon       | 0,16 |
| TC0200003300.mm.1 | 6,61 Dnm1                    | JUC0200014135.mm.1 | 2,3   | 0,016501 | 0,459428                     |      |
| TC0200003300.mm.1 | 6,61 Dnm1                    | JUC0200014146.mm.1 | 2,01  | 0,002395 | 0,348564                     |      |
| TC0200003300.mm.1 | 6,61 Dnm1                    | PSR0200028049.mm.1 | -2,12 | 0,002843 | 0,352207 Cassette Exon       | 0,26 |
| TC0200003300.mm.1 | 6,61 Dnm1                    | PSR0200028023.mm.1 | -2,18 | 0,034065 | 0,524583 Alternative 5' Donc | 0,18 |
| TC0200003300.mm.1 | 6,61 Dnm1                    | PSR0200028034.mm.1 | -2,45 | 0,004564 | 0,369273 Cassette Exon       | 0,27 |
| TC0200003300.mm.1 | 6,61 Dnm1                    | JUC0200014147.mm.1 | -2,64 | 0,016468 | 0,459288                     |      |
| TC0200003300.mm.1 | 6,61 Dnm1                    | PSR0200028021.mm.1 | -2,65 | 0,031726 | 0,517489 Alternative 5' Donc | 0,25 |
| TC0200003300.mm.1 | 6,61 Dnm1                    | PSR0200028024.mm.1 | -2,73 | 0,006341 | 0,389463 Alternative 5' Donc | 0,18 |
| TC0200003300.mm.1 | 6,61 Dnm1                    | PSR0200028047.mm.1 | -2,87 | 0,013305 | 0,441836 Cassette Exon       | 0,17 |
| TC0200003300.mm.1 | 6,61 Dnm1                    | PSR0200028025.mm.1 | -3,21 | 0,002583 | 0,349501 Cassette Exon       | 0,2  |
| TC0200003300.mm.1 | 6,61 Dnm1                    | JUC0200014133.mm.1 | -3,63 | 0,009507 | 0,416602                     |      |

|                   |                     |                    |        |          |                              |      |
|-------------------|---------------------|--------------------|--------|----------|------------------------------|------|
| TC0200003300.mm.1 | 6,61 Dnm1           | PSR0200028060.mm.1 | -4,62  | 0,020509 | 0,47825 Cassette Exon        | 0,41 |
| TC0200003300.mm.1 | 6,61 Dnm1           | PSR0200028036.mm.1 | -5,28  | 0,000454 | 0,298307 Alternative 5' Donc | 0,47 |
| TC0200003300.mm.1 | 6,61 Dnm1           | JUC0200014154.mm.1 | -6     | 0,001844 | 0,337414                     |      |
| TC0200003300.mm.1 | 6,61 Dnm1           | PSR0200028022.mm.1 | -6,48  | 0,002075 | 0,342181 Cassette Exon       | 0,28 |
| TC0200003300.mm.1 | 6,61 Dnm1           | PSR0200028027.mm.1 | -6,89  | 0,019861 | 0,475704 Cassette Exon       | 0,28 |
| TC0200003300.mm.1 | 6,61 Dnm1           | PSR0200028028.mm.1 | -7,04  | 0,003095 | 0,353892                     |      |
| TC0200003300.mm.1 | 6,61 Dnm1           | JUC0200014150.mm.1 | -7,62  | 0,009622 | 0,417315                     |      |
| TC0200003300.mm.1 | 6,61 Dnm1           | PSR0200028059.mm.1 | -7,78  | 0,002633 | 0,349612 Cassette Exon       | 0,21 |
| TC0200003300.mm.1 | 6,61 Dnm1           | PSR0200028068.mm.1 | -8,1   | 0,005119 | 0,37627 Cassette Exon        | 0,41 |
| TC0200003300.mm.1 | 6,61 Dnm1           | JUC0200014155.mm.1 | -8,22  | 0,003413 | 0,355249                     |      |
| TC0200003300.mm.1 | 6,61 Dnm1           | PSR0200028041.mm.1 | -12,3  | 0,000806 | 0,311765 Cassette Exon       | 0,4  |
| TC0200003300.mm.1 | 6,61 Dnm1           | JUC0200014160.mm.1 | -14,31 | 0,005264 | 0,377955                     |      |
| TC0200003300.mm.1 | 6,61 Dnm1           | JUC0200014158.mm.1 | -21,43 | 0,000015 | 0,18968                      |      |
| TC1400001703.mm.1 | 1,45 Chat           | JUC1400007196.mm.1 | 2,92   | 0,025832 | 0,498598                     |      |
| TC1400001703.mm.1 | 1,45 Chat           | PSR1400013218.mm.1 | -3,67  | 0,010464 | 0,421696 Alternative 5' Donc | 0,41 |
| TC0X00002450.mm.1 | -2,15 Lage3         | PSR0X00015576.mm.1 | 2,92   | 0,008307 | 0,406196 Alternative 3' Acce | 0,23 |
| TC0200000651.mm.1 | -1,52 Ptgs1         | PSR0200005995.mm.1 | 2,92   | 0,002346 | 0,34761 Cassette Exon        | 0,22 |
| TC0200000651.mm.1 | -1,52 Ptgs1         | JUC0200003065.mm.1 | 2,06   | 0,01425  | 0,447947                     |      |
| TC0600000293.mm.1 | -2,28 Gm13844       | PSR0600002161.mm.1 | 2,92   | 0,012245 | 0,433659 Cassette Exon       | 0,22 |
| TC0300000990.mm.1 | -1,99 Tbx15         | PSR0300008005.mm.1 | 2,92   | 0,002282 | 0,34605 Alternative 3' Acce  | 0,21 |
| TC1700001834.mm.1 | -1,38 Notch3        | PSR1700016886.mm.1 | 2,92   | 0,048509 | 0,560989 Cassette Exon       | 0,21 |
| TC0400000036.mm.1 | 1,05 Ubxn2b         | PSR0400000244.mm.1 | 2,92   | 0,030655 | 0,513785 Cassette Exon       | 0,19 |
| TC0300002567.mm.1 | -1,59 5730437C11Rik | PSR0300020062.mm.1 | 2,92   | 0,043597 | 0,550133 Cassette Exon       | 0,18 |
| TC0800000936.mm.1 | 1,32 Lphn1          | JUC0800003669.mm.1 | 2,92   | 0,001656 | 0,334378                     |      |
| TC0800000936.mm.1 | 1,32 Lphn1          | PSR0800006948.mm.1 | -2,12  | 0,040889 | 0,543423 Alternative 5' Donc | 0,18 |
| TC0800000936.mm.1 | 1,32 Lphn1          | JUC0800003692.mm.1 | -2,26  | 0,002205 | 0,345178                     |      |
| TC0700003474.mm.1 | -2,02 LOC624549     | JUC0700015583.mm.1 | 2,92   | 0,038279 | 0,536002                     |      |
| TC0700003474.mm.1 | -2,02 LOC624549     | PSR0700029519.mm.1 | 2,49   | 0,022307 | 0,486127 Alternative 5' Donc | 0,13 |
| TC0200002496.mm.1 | -1,41 Wisp2         | JUC0200010364.mm.1 | 2,92   | 0,001314 | 0,324276                     |      |
| TC0200004457.mm.1 | -1,08 Pla2g4f       | JUC0200019206.mm.1 | 2,92   | 0,006706 | 0,393343                     |      |
| TC0200004457.mm.1 | -1,08 Pla2g4f       | JUC0200019210.mm.1 | -2,27  | 0,017549 | 0,464165                     |      |
| TC0500000387.mm.1 | -1,39 Rgs12         | JUC0500002129.mm.1 | 2,92   | 0,015967 | 0,456885                     |      |
| TC0900001410.mm.1 | 1,11 Qars           | JUC0900006265.mm.1 | 2,92   | 0,036585 | 0,531424                     |      |
| TC0700004189.mm.1 | -1,06 Eri2          | JUC0700018354.mm.1 | 2,92   | 0,008368 | 0,406435                     |      |
| TC1900000546.mm.1 | 3,26 Pde6c          | JUC1900002583.mm.1 | 2,91   | 0,00595  | 0,385276                     |      |
| TC1900000546.mm.1 | 3,26 Pde6c          | JUC1900002593.mm.1 | 2,53   | 0,004863 | 0,371692                     |      |
| TC1900000546.mm.1 | 3,26 Pde6c          | PSR1900004884.mm.1 | 2,22   | 0,002007 | 0,341091 Cassette Exon       | 0,14 |
| TC1900000546.mm.1 | 3,26 Pde6c          | PSR1900004892.mm.1 | -2,98  | 0,003964 | 0,359943 Cassette Exon       | 0,31 |
| TC1900000546.mm.1 | 3,26 Pde6c          | PSR1900004872.mm.1 | -3,15  | 0,001256 | 0,322251 Cassette Exon       | 0,11 |
| TC1900000546.mm.1 | 3,26 Pde6c          | JUC1900002603.mm.1 | -5,05  | 0,004449 | 0,367227                     |      |
| TC1600001528.mm.1 | -1,16 Kalrn         | PSR1600012530.mm.1 | 2,91   | 0,029789 | 0,511132 Cassette Exon       | 0,21 |
| TC1600001528.mm.1 | -1,16 Kalrn         | PSR1600012532.mm.1 | 2,25   | 0,035349 | 0,528451 Cassette Exon       | 0,12 |
| TC1600001528.mm.1 | -1,16 Kalrn         | JUC1600006544.mm.1 | 2,18   | 0,002611 | 0,349501                     |      |
| TC1600001528.mm.1 | -1,16 Kalrn         | JUC1600006586.mm.1 | -2,45  | 0,040716 | 0,542933                     |      |
| TC0100000338.mm.1 | -1,44 Gulp1         | JUC0100001431.mm.1 | 2,91   | 0,016117 | 0,457756                     |      |
| TC0100000338.mm.1 | -1,44 Gulp1         | JUC0100001427.mm.1 | 2,51   | 0,014676 | 0,450139                     |      |
| TC0100000338.mm.1 | -1,44 Gulp1         | PSR0100002529.mm.1 | 2,3    | 0,001095 | 0,317328 Alternative 3' Acce | 0,15 |
| TC1100003778.mm.1 | -1,2 Zfp385c        | JUC1100018188.mm.1 | 2,91   | 0,041899 | 0,545772                     |      |

|                   |                        |                    |       |          |          |                          |
|-------------------|------------------------|--------------------|-------|----------|----------|--------------------------|
| TC1100003778.mm.1 | -1,2 Zfp385c           | JUC1100018190.mm.1 | 2,59  | 0,005005 | 0,373851 |                          |
| TC1100003778.mm.1 | -1,2 Zfp385c           | JUC1100018191.mm.1 | -2,03 | 0,029629 | 0,510558 |                          |
| TC1200002158.mm.1 | 1,11 Sel1l             | JUC1200008269.mm.1 | 2,91  | 0,029296 | 0,509874 |                          |
| TC1200002158.mm.1 | 1,11 Sel1l             | JUC1200008282.mm.1 | -3,3  | 0,036694 | 0,531756 |                          |
| TC1500001776.mm.1 | -1,17 Bop1             | JUC1500007768.mm.1 | 2,91  | 0,022031 | 0,485268 |                          |
| TC1500001776.mm.1 | -1,17 Bop1             | JUC1500007769.mm.1 | 2,27  | 0,000771 | 0,308743 |                          |
| TC0500001594.mm.1 | -1,23 Dtx2             | JUC0500007835.mm.1 | 2,91  | 0,043695 | 0,550256 |                          |
| TC0600000226.mm.1 | 1,14 Hilpda            | JUC0600000714.mm.1 | 2,91  | 0,036327 | 0,530547 |                          |
| TC0400003073.mm.1 | -1,06 Plaa             | JUC0400012772.mm.1 | 2,91  | 0,013747 | 0,444758 |                          |
| TC0400003124.mm.1 | -1,13 Dock7            | JUC0400012973.mm.1 | 2,91  | 0,024545 | 0,494083 |                          |
| TC0500003092.mm.1 | 2,6 Cabp1              | PSR0500027504.mm.1 | 2,9   | 0,002606 | 0,349501 | Cassette Exon 0,04       |
| TC0500003092.mm.1 | 2,6 Cabp1              | JUC0500015009.mm.1 | 2,73  | 0,037337 | 0,533573 |                          |
| TC0500003092.mm.1 | 2,6 Cabp1              | JUC0500015013.mm.1 | 2,29  | 0,030764 | 0,514109 |                          |
| TC0500003092.mm.1 | 2,6 Cabp1              | JUC0500015007.mm.1 | 2,26  | 0,002754 | 0,350151 |                          |
| TC0500003092.mm.1 | 2,6 Cabp1              | PSR0500027498.mm.1 | -2,1  | 0,006303 | 0,389124 | Cassette Exon 0,03       |
| TC0500003092.mm.1 | 2,6 Cabp1              | JUC0500015016.mm.1 | -2,12 | 0,029574 | 0,510456 |                          |
| TC0500003092.mm.1 | 2,6 Cabp1              | PSR0500027508.mm.1 | -2,18 | 0,009452 | 0,416438 | Cassette Exon 0,22       |
| TC0500003092.mm.1 | 2,6 Cabp1              | PSR0500027509.mm.1 | -2,19 | 0,018292 | 0,468049 | Cassette Exon 0,22       |
| TC0500003092.mm.1 | 2,6 Cabp1              | PSR0500027505.mm.1 | -2,27 | 0,000593 | 0,304044 | Cassette Exon 0,22       |
| TC0500003092.mm.1 | 2,6 Cabp1              | PSR0500027513.mm.1 | -2,55 | 0,002279 | 0,345991 | Alternative 5' Donc 0,25 |
| TC0500003092.mm.1 | 2,6 Cabp1              | PSR0500027515.mm.1 | -2,84 | 0,006576 | 0,39213  | Cassette Exon 0,11       |
| TC0500003092.mm.1 | 2,6 Cabp1              | JUC0500015010.mm.1 | -5,62 | 0,047273 | 0,558224 |                          |
| TC1600000911.mm.1 | -1,14 1700066C05Rik    | PSR1600007255.mm.1 | 2,9   | 0,005322 | 0,378059 | Cassette Exon 0,18       |
| TC0500003446.mm.1 | -1,45 Zan              | JUC0500017024.mm.1 | 2,9   | 0,005472 | 0,379939 |                          |
| TC0500003446.mm.1 | -1,45 Zan              | PSR0500031301.mm.1 | 2,47  | 0,034097 | 0,524826 | Cassette Exon 0,16       |
| TC0500003446.mm.1 | -1,45 Zan              | JUC0500017045.mm.1 | 2,05  | 0,004853 | 0,37168  |                          |
| TC0500003446.mm.1 | -1,45 Zan              | PSR0500031323.mm.1 | 2,03  | 0,036293 | 0,530447 | Cassette Exon 0,09       |
| TC1100004236.mm.1 | 1,12 Csnk1d            | JUC1100021310.mm.1 | 2,9   | 0,005264 | 0,377955 |                          |
| TC1500002327.mm.1 | -1,2 Prlr              | JUC1500000442.mm.1 | 2,9   | 0,045454 | 0,554199 |                          |
| TC0600003120.mm.1 | 1,31 Usp5              | JUC0600012628.mm.1 | 2,9   | 0,002893 | 0,352207 |                          |
| TC0700001896.mm.1 | 1,11 Ppapdc1a          | JUC0700008698.mm.1 | 2,9   | 0,025971 | 0,499207 |                          |
| TC1600001642.mm.1 | 1,13 Sidt1             | JUC1600006991.mm.1 | 2,89  | 0,003737 | 0,357586 |                          |
| TC1600001642.mm.1 | 1,13 Sidt1             | PSR1600013405.mm.1 | -3,61 | 0,024125 | 0,493245 | Alternative 5' Donc 0,41 |
| TC0100000659.mm.1 | -1,54 Gmppa            | PSR0100005635.mm.1 | 2,89  | 0,025348 | 0,497375 | Alternative 5' Donc 0,3  |
| TC0700000980.mm.1 | 1,2 Apba2              | PSR0700008978.mm.1 | 2,89  | 0,007438 | 0,399934 | Alternative 5' Donc 0,3  |
| TC0700000980.mm.1 | 1,2 Apba2              | PSR0700008967.mm.1 | 2,3   | 0,032335 | 0,519155 | Cassette Exon 0,15       |
| TC0700000980.mm.1 | 1,2 Apba2              | PSR0700008961.mm.1 | 2,08  | 0,004994 | 0,373851 | Cassette Exon 0,11       |
| TC0700000980.mm.1 | 1,2 Apba2              | JUC0700004583.mm.1 | 2,05  | 0,033995 | 0,524346 |                          |
| TC0400000460.mm.1 | -1,08 Cta              | PSR0400003240.mm.1 | 2,89  | 0,01535  | 0,453763 | Cassette Exon 0,26       |
| TC1000003113.mm.1 | -1,63 Gli1             | JUC1000012798.mm.1 | 2,89  | 0,02109  | 0,480371 |                          |
| TC1000003113.mm.1 | -1,63 Gli1             | PSR1000023280.mm.1 | 2,16  | 0,035447 | 0,52871  | Cassette Exon 0,2        |
| TC0X00000069.mm.1 | 1,13 Gripap1           | PSR0X00000475.mm.1 | 2,89  | 0,022512 | 0,487114 | Cassette Exon 0,18       |
| TC1500000594.mm.1 | 2,3                    | PSR1500004267.mm.1 | 2,89  | 0,00922  | 0,41411  | Cassette Exon 0,17       |
| TC1500000594.mm.1 | 2,3                    | PSR1500004265.mm.1 | -2,6  | 0,00112  | 0,317328 | Cassette Exon 0,15       |
| TC0Y00000217.mm.1 | -1,23 Gm21294; Gm20736 | JUC0Y00000891.mm.1 | 2,89  | 0,023266 | 0,49004  |                          |
| TC0Y00000217.mm.1 | -1,23 Gm21294; Gm20736 | PSR0Y00001213.mm.1 | -2,32 | 0,03657  | 0,531355 | Cassette Exon 0,13       |
| TC1300000072.mm.1 | 1,32 Ero1lb            | JUC1300000311.mm.1 | 2,89  | 0,043063 | 0,54841  |                          |
| TC0800001620.mm.1 | -1,4 Rprl3             | PSR0800013329.mm.1 | 2,89  | 0,036532 | 0,531352 |                          |

|                   |                     |                    |       |          |                              |      |
|-------------------|---------------------|--------------------|-------|----------|------------------------------|------|
| TC1500001177.mm.1 | -1,2                | JUC1500005321.mm.1 | 2,89  | 0,012671 | 0,43631                      |      |
| TC1500000034.mm.1 | -1,01 C9            | JUC1500000174.mm.1 | 2,89  | 0,013299 | 0,441759                     |      |
| TC0800000981.mm.1 | 1,16 Dhps           | JUC0800003986.mm.1 | 2,89  | 0,012676 | 0,43631                      |      |
| TC1000003156.mm.1 | 1,02 lkzf4          | JUC1000013083.mm.1 | 2,89  | 0,011655 | 0,429904                     |      |
| TC1000003156.mm.1 | 1,02 lkzf4          | JUC1000013095.mm.1 | -3,5  | 0,028333 | 0,506831                     |      |
| TC1000000301.mm.1 | -1,95 Frk           | JUC1000001090.mm.1 | 2,89  | 0,001872 | 0,338238                     |      |
| TCOX00003018.mm.1 | 1,15 Bex2           | JUCOX00009580.mm.1 | 2,89  | 0,000608 | 0,304044                     |      |
| TC1100001162.mm.1 | 6,14 Vtn            | JUC1100005678.mm.1 | 2,88  | 0,014236 | 0,447947                     |      |
| TC1100001162.mm.1 | 6,14 Vtn            | JUC1100005676.mm.1 | 2,4   | 0,023564 | 0,490947                     |      |
| TC1100001162.mm.1 | 6,14 Vtn            | PSR1100010837.mm.1 | -2,41 | 0,037194 | 0,533261 Alternative 3' Acce | 0,22 |
| TC1100001162.mm.1 | 6,14 Vtn            | PSR1100010833.mm.1 | -3,41 | 0,002596 | 0,349501 Intron Retention    | 0,6  |
| TC1100001162.mm.1 | 6,14 Vtn            | PSR1100010826.mm.1 | -3,49 | 0,000634 | 0,304044 Alternative 3' Acce | 0,44 |
| TC1100001162.mm.1 | 6,14 Vtn            | PSR1100010827.mm.1 | -5,54 | 0,000063 | 0,250119 Alternative 3' Acce | 0,44 |
| TC1100001162.mm.1 | 6,14 Vtn            | PSR1100010830.mm.1 | -7,18 | 0,00002  | 0,211693 Intron Retention    | 0,73 |
| TC1400000947.mm.1 | -1,17 Adra1a        | PSR1400007628.mm.1 | 2,88  | 0,023446 | 0,490562 Alternative 3' Acce | 0,21 |
| TCOX00001514.mm.1 | 1,55 Wnk3           | JUCOX00004716.mm.1 | 2,88  | 0,048123 | 0,559938                     |      |
| TCOX00001514.mm.1 | 1,55 Wnk3           | JUCOX00004720.mm.1 | -2,56 | 0,032054 | 0,518469                     |      |
| TCOX00001514.mm.1 | 1,55 Wnk3           | PSROX00009460.mm.1 | -3,15 | 0,003933 | 0,359818 Alternative 5' Donc | 0,17 |
| TC1700001942.mm.1 | -1,43 G6b; AU023871 | JUC1700009874.mm.1 | 2,88  | 0,009318 | 0,414883                     |      |
| TC1500000666.mm.1 | -1,3 Micall1        | JUC1500002841.mm.1 | 2,88  | 0,008205 | 0,405909                     |      |
| TC1500000666.mm.1 | -1,3 Micall1        | JUC1500002848.mm.1 | 2,22  | 0,021077 | 0,480371                     |      |
| TC0800001899.mm.1 | -1,03 Adam5         | JUC0800008216.mm.1 | 2,88  | 0,004092 | 0,36228                      |      |
| TC0600002592.mm.1 | -1,11 Cyp26b1       | JUC0600010443.mm.1 | 2,88  | 0,010352 | 0,421002                     |      |
| TCOY00000205.mm.1 | -1,28 Gm20911       | JUCOY00000788.mm.1 | 2,88  | 0,029037 | 0,508904                     |      |
| TC0600001180.mm.1 | 3,62 Cntn4          | PSR0600009130.mm.1 | 2,87  | 0,024509 | 0,493992 Cassette Exon       | 0,19 |
| TC0600001180.mm.1 | 3,62 Cntn4          | JUC0600004680.mm.1 | 2,62  | 0,002395 | 0,348564                     |      |
| TC0600001180.mm.1 | 3,62 Cntn4          | JUC0600004683.mm.1 | -2,04 | 0,000472 | 0,298999                     |      |
| TC0600001180.mm.1 | 3,62 Cntn4          | PSR0600009133.mm.1 | -2,08 | 0,003457 | 0,355628 Cassette Exon       | 0,29 |
| TC0600001180.mm.1 | 3,62 Cntn4          | JUC0600004672.mm.1 | -2,09 | 0,01876  | 0,470733                     |      |
| TC0600001180.mm.1 | 3,62 Cntn4          | PSR0600009100.mm.1 | -2,1  | 0,002043 | 0,341377 Alternative 3' Acce | 0,35 |
| TC0600001180.mm.1 | 3,62 Cntn4          | PSR0600009095.mm.1 | -2,23 | 0,025521 | 0,497708 Cassette Exon       | 0,12 |
| TC0600001180.mm.1 | 3,62 Cntn4          | JUC0600004699.mm.1 | -2,87 | 0,000188 | 0,285336                     |      |
| TC0600001180.mm.1 | 3,62 Cntn4          | PSR0600009103.mm.1 | -3,04 | 0,037023 | 0,532502 Cassette Exon       | 0,19 |
| TC0600001180.mm.1 | 3,62 Cntn4          | JUC0600004673.mm.1 | -3,17 | 0,032521 | 0,519901                     |      |
| TC0600001180.mm.1 | 3,62 Cntn4          | JUC0600004668.mm.1 | -3,28 | 0,001754 | 0,335996                     |      |
| TC0600001180.mm.1 | 3,62 Cntn4          | PSR0600009134.mm.1 | -3,3  | 0,009189 | 0,413763 Cassette Exon       | 0,29 |
| TC0600001180.mm.1 | 3,62 Cntn4          | PSR0600009093.mm.1 | -3,35 | 0,016823 | 0,460623 Cassette Exon       | 0,2  |
| TC0600001180.mm.1 | 3,62 Cntn4          | PSR0600009097.mm.1 | -3,6  | 0,020039 | 0,476453 Cassette Exon       | 0,38 |
| TC0600001180.mm.1 | 3,62 Cntn4          | PSR0600009089.mm.1 | -3,67 | 0,006068 | 0,386691 Cassette Exon       | 0,36 |
| TC0600001180.mm.1 | 3,62 Cntn4          | PSR0600009096.mm.1 | -3,75 | 0,038242 | 0,535883 Cassette Exon       | 0,26 |
| TC0600001180.mm.1 | 3,62 Cntn4          | PSR0600009128.mm.1 | -3,84 | 0,001574 | 0,331411 Cassette Exon       | 0,32 |
| TC0600001180.mm.1 | 3,62 Cntn4          | PSR0600009124.mm.1 | -4,02 | 0,000101 | 0,262646 Alternative 5' Donc | 0,46 |
| TC0600001180.mm.1 | 3,62 Cntn4          | PSR0600009135.mm.1 | -4,04 | 0,005013 | 0,373867 Alternative 3' Acce | 0,48 |
| TC0600001180.mm.1 | 3,62 Cntn4          | PSR0600009091.mm.1 | -4,37 | 0,026827 | 0,502373 Cassette Exon       | 0,36 |
| TC0600001180.mm.1 | 3,62 Cntn4          | PSR0600009115.mm.1 | -4,56 | 0,019972 | 0,476227 Alternative 5' Donc | 0,55 |
| TC0600001180.mm.1 | 3,62 Cntn4          | PSR0600009126.mm.1 | -4,91 | 0,007889 | 0,403787 Cassette Exon       | 0,28 |
| TC0600001180.mm.1 | 3,62 Cntn4          | JUC0600004676.mm.1 | -5,03 | 0,001065 | 0,316361                     |      |
| TC0600001180.mm.1 | 3,62 Cntn4          | JUC0600004691.mm.1 | -5,42 | 0,023439 | 0,490451                     |      |



|                   |                              |                     |       |          |                              |      |
|-------------------|------------------------------|---------------------|-------|----------|------------------------------|------|
| TC0600001180.mm.1 | 3,62 Cntn4                   | PSR0600009106.mm.1  | -5,53 | 0,00756  | 0,401384 Alternative 5' Donc | 0,34 |
| TC0600001180.mm.1 | 3,62 Cntn4                   | PSR0600009099.mm.1  | -5,68 | 0,004066 | 0,361956 Alternative 3' Acce | 0,35 |
| TC0600001180.mm.1 | 3,62 Cntn4                   | PSR0600009098.mm.1  | -5,85 | 0,009764 | 0,417839 Alternative 3' Acce | 0,35 |
| TC0600001180.mm.1 | 3,62 Cntn4                   | PSR0600009118.mm.1  | -6,61 | 0,004029 | 0,361636 Alternative 5' Donc | 0,49 |
| TC0600001180.mm.1 | 3,62 Cntn4                   | JUC0600004666.mm.1  | -7,24 | 0,000194 | 0,28803                      |      |
| TC0600001180.mm.1 | 3,62 Cntn4                   | PSR0600009125.mm.1  | -7,55 | 0,001319 | 0,324348 Cassette Exon       | 0,3  |
| TC0600001180.mm.1 | 3,62 Cntn4                   | JUC0600004670.mm.1  | -8,2  | 0,00994  | 0,41841                      |      |
| TC0800000353.mm.1 | -1,94 Eif4ebp1               | JUC0800001473.mm.1  | 2,87  | 0,00266  | 0,349612                     |      |
| TC0800000353.mm.1 | -1,94 Eif4ebp1               | PSR0800002713.mm.1  | 2,53  | 0,007958 | 0,403853 Cassette Exon       | 0,23 |
| TC0800000353.mm.1 | -1,94 Eif4ebp1               | PSR0800002712.mm.1  | 2,48  | 0,005081 | 0,375342 Cassette Exon       | 0,23 |
| TC1600001334.mm.1 | 1,55 Lamp3                   | PSR1600010994.mm.1  | 2,87  | 0,045959 | 0,555364 Cassette Exon       | 0,21 |
| TC0600002607.mm.1 | 1,4 Sfxn5                    | PSR06000020237.mm.1 | 2,87  | 0,003017 | 0,353447 Cassette Exon       | 0,17 |
| TC0600002607.mm.1 | 1,4 Sfxn5                    | PSR06000020235.mm.1 | 2,37  | 0,011929 | 0,431666 Cassette Exon       | 0,13 |
| TC0600002607.mm.1 | 1,4 Sfxn5                    | PSR06000020244.mm.1 | 2,03  | 0,018012 | 0,466939                     |      |
| TC0600002607.mm.1 | 1,4 Sfxn5                    | JUC06000010498.mm.1 | -3,6  | 0,011301 | 0,427126                     |      |
| TC1300001512.mm.1 | 1,07 Pou6f2                  | PSR1300009581.mm.1  | 2,87  | 0,004661 | 0,370181 Alternative 3' Acce | 0,17 |
| TC0Y00000210.mm.1 | -1,1 Gm21409                 | JUC0Y00000830.mm.1  | 2,87  | 0,020428 | 0,478018                     |      |
| TC0Y00000210.mm.1 | -1,1 Gm21409                 | PSR0Y00001140.mm.1  | -2,49 | 0,033587 | 0,523246 Cassette Exon       | 0,14 |
| TC0400001451.mm.1 | 1,45 Oscp1                   | JUC0400005749.mm.1  | 2,87  | 0,038889 | 0,537855                     |      |
| TC0400001451.mm.1 | 1,45 Oscp1                   | PSR0400011037.mm.1  | -2,25 | 0,043911 | 0,550662 Cassette Exon       | 0,12 |
| TC1800000076.mm.1 | 1,1 Greb1l                   | JUC1800000259.mm.1  | 2,87  | 0,027039 | 0,502979                     |      |
| TC1800000076.mm.1 | 1,1 Greb1l                   | JUC1800000278.mm.1  | -2,18 | 0,005575 | 0,381035                     |      |
| TC0500000602.mm.1 | -1,47 Fam114a1               | JUC0500002954.mm.1  | 2,87  | 0,019521 | 0,474538                     |      |
| TC1100002841.mm.1 | -1,18 Obscn                  | JUC1100013308.mm.1  | 2,87  | 0,043996 | 0,550779                     |      |
| TC1100002841.mm.1 | -1,18 Obscn                  | JUC1100013343.mm.1  | -2,84 | 0,020573 | 0,478487                     |      |
| TC1100001723.mm.1 | 1,2 Crhr1                    | JUC1100008413.mm.1  | 2,87  | 0,038655 | 0,537102                     |      |
| TC0X00002994.mm.1 | -1,33 Btk                    | JUC0X00009427.mm.1  | 2,87  | 0,000235 | 0,28803                      |      |
| TC0X00002994.mm.1 | -1,33 Btk                    | JUC0X00009430.mm.1  | 2,23  | 0,014531 | 0,449545                     |      |
| TC0300000354.mm.1 | -1,5 Ccrn4l                  | PSR0300002538.mm.1  | 2,86  | 0,013445 | 0,442693 Alternative 5' Donc | 0,28 |
| TC1000001901.mm.1 | 1,48 Akap7                   | JUC1000007479.mm.1  | 2,86  | 0,006299 | 0,389034                     |      |
| TC1000001901.mm.1 | 1,48 Akap7                   | PSR1000013724.mm.1  | -2,07 | 0,043832 | 0,550456 Cassette Exon       | 0,1  |
| TC1000001901.mm.1 | 1,48 Akap7                   | PSR1000013709.mm.1  | -2,1  | 0,008634 | 0,408463 Alternative 5' Donc | 0,18 |
| TC1000001901.mm.1 | 1,48 Akap7                   | JUC1000007473.mm.1  | -2,1  | 0,012973 | 0,439245                     |      |
| TC0800000782.mm.1 | 1,08 Myo9b                   | JUC0800002970.mm.1  | 2,86  | 0,000055 | 0,24627                      |      |
| TC0800000782.mm.1 | 1,08 Myo9b                   | PSR0800005553.mm.1  | -2,07 | 0,000347 | 0,290082 Cassette Exon       | 0,13 |
| TC1300000566.mm.1 | -1,76 Aspn                   | JUC1300001802.mm.1  | 2,86  | 0,0306   | 0,513461                     |      |
| TC0100002707.mm.1 | -1,31 C130026I2Rik; A530032I | JUC0100012467.mm.1  | 2,86  | 0,009822 | 0,417839                     |      |
| TC0100002707.mm.1 | -1,31 C130026I2Rik; A530032I | JUC0100012469.mm.1  | -2,07 | 0,035604 | 0,528912                     |      |
| TC0500003161.mm.1 | -2,02 1700021F13Rik          | JUC0500015248.mm.1  | 2,86  | 0,009316 | 0,414883                     |      |
| TC0300002683.mm.1 | -1,23 Chi3l7; Chil5          | JUC0300010867.mm.1  | 2,86  | 0,036547 | 0,531355                     |      |
| TC0400003285.mm.1 | -1,29 Slc5a9                 | JUC0400013594.mm.1  | 2,86  | 0,010463 | 0,421696                     |      |
| TC0900002604.mm.1 | 1,04 Aqp9                    | JUC0900012183.mm.1  | 2,86  | 0,040378 | 0,541959                     |      |
| TC0600000103.mm.1 | -1,49 Foxp2                  | PSR0600000683.mm.1  | 2,85  | 0,014534 | 0,449545 Alternative 3' Acce | 0,29 |
| TC0600000103.mm.1 | -1,49 Foxp2                  | JUC0600000366.mm.1  | 2,03  | 0,04469  | 0,552181                     |      |
| TC0400001193.mm.1 | -1,37 Skint7                 | PSR0400008672.mm.1  | 2,85  | 0,01132  | 0,427133 Cassette Exon       | 0,18 |
| TC0600000387.mm.1 | -1,57 4930502C15Rik          | JUC0600001496.mm.1  | 2,85  | 0,017255 | 0,46278                      |      |
| TC0600000387.mm.1 | -1,57 4930502C15Rik          | PSR0600002966.mm.1  | 2,03  | 0,041471 | 0,54472 Cassette Exon        | 0,09 |
| TC0200002485.mm.1 | 1,7 Gdap1l1                  | JUC0200010315.mm.1  | 2,85  | 0,003528 | 0,355858                     |      |

|                   |                     |                    |       |          |                              |      |
|-------------------|---------------------|--------------------|-------|----------|------------------------------|------|
| TC0200002485.mm.1 | 1,7 Gdap1l1         | JUC0200010311.mm.1 | 2,41  | 0,007558 | 0,401384                     |      |
| TC0200002485.mm.1 | 1,7 Gdap1l1         | JUC0200010309.mm.1 | -2,02 | 0,002764 | 0,350231                     |      |
| TC0200002485.mm.1 | 1,7 Gdap1l1         | JUC0200010314.mm.1 | -2,55 | 0,006827 | 0,393893                     |      |
| TC0200003649.mm.1 | 1,11 Gm13575        | JUC0200015784.mm.1 | 2,85  | 0,010724 | 0,423745                     |      |
| TC1700002618.mm.1 | -1,33               | JUC1700012841.mm.1 | 2,85  | 0,022427 | 0,48681                      |      |
| TC1700002368.mm.1 | -1,74 EfnA5         | JUC1700011909.mm.1 | 2,85  | 0,023366 | 0,490143                     |      |
| TC1700001036.mm.1 | -1,05 Cntnap5c      | JUC1700005360.mm.1 | 2,85  | 0,031575 | 0,517177                     |      |
| TC0900001344.mm.1 | -1,2 Poc1a          | JUC0900005764.mm.1 | 2,85  | 0,003786 | 0,357586                     |      |
| TC0500001006.mm.1 | -1,17 Ptpn13        | JUC0500004663.mm.1 | 2,85  | 0,031501 | 0,516965                     |      |
| TC0300002876.mm.1 | 1,1 Mettl14         | JUC0300011873.mm.1 | 2,85  | 0,000449 | 0,297771                     |      |
| TC0300002876.mm.1 | 1,1 Mettl14         | JUC0300011874.mm.1 | 2,16  | 0,033549 | 0,523131                     |      |
| TC1000002288.mm.1 | 1,42 Lrrtm3         | JUC1000008993.mm.1 | 2,85  | 0,015228 | 0,452839                     |      |
| TC1000002288.mm.1 | 1,42 Lrrtm3         | PSR1000016407.mm.1 | 2,26  | 0,015463 | 0,454312                     |      |
| TC0900003204.mm.1 | -1,19 Rbms3         | PSR0900027014.mm.1 | 2,85  | 0,047888 | 0,559408                     |      |
| TC0400001535.mm.1 | 1,02 E330017L17Rik  | JUC0400006188.mm.1 | 2,85  | 0,008806 | 0,409934                     |      |
| TC0300000928.mm.1 | 3,19 Sv2a           | JUC0300003857.mm.1 | 2,84  | 0,007411 | 0,399901                     |      |
| TC0300000928.mm.1 | 3,19 Sv2a           | JUC0300003848.mm.1 | -2,41 | 0,043196 | 0,548962                     |      |
| TC0300000928.mm.1 | 3,19 Sv2a           | PSR0300007427.mm.1 | -3,16 | 0,01379  | 0,444974 Alternative 3' Acce | 0,25 |
| TC0300000928.mm.1 | 3,19 Sv2a           | PSR0300007426.mm.1 | -3,18 | 0,003797 | 0,357968 Cassette Exon       | 0,33 |
| TC0300000928.mm.1 | 3,19 Sv2a           | PSR0300007424.mm.1 | -3,67 | 0,013097 | 0,439759 Cassette Exon       | 0,31 |
| TC1300001395.mm.1 | 3,72 Pfkp           | PSR1300008736.mm.1 | 2,84  | 0,000921 | 0,313363 Alternative 3' Acce | 0,12 |
| TC1300001395.mm.1 | 3,72 Pfkp           | PSR1300008750.mm.1 | -2,02 | 0,006298 | 0,389033 Cassette Exon       | 0,06 |
| TC1300001395.mm.1 | 3,72 Pfkp           | JUC1300004541.mm.1 | -2,06 | 0,035051 | 0,527561                     |      |
| TC1300001395.mm.1 | 3,72 Pfkp           | PSR1300008754.mm.1 | -2,11 | 0,00173  | 0,335996 Cassette Exon       | 0,14 |
| TC1300001395.mm.1 | 3,72 Pfkp           | PSR1300008721.mm.1 | -2,16 | 0,01574  | 0,455416 Cassette Exon       | 0,2  |
| TC1300001395.mm.1 | 3,72 Pfkp           | JUC1300004529.mm.1 | -2,16 | 0,040417 | 0,541998                     |      |
| TC1300001395.mm.1 | 3,72 Pfkp           | JUC1300004550.mm.1 | -2,36 | 0,011808 | 0,430357                     |      |
| TC1300001395.mm.1 | 3,72 Pfkp           | PSR1300008755.mm.1 | -2,48 | 0,00354  | 0,3562 Alternative 3' Acce   | 0,17 |
| TC1300001395.mm.1 | 3,72 Pfkp           | JUC1300004531.mm.1 | -2,55 | 0,002498 | 0,349142                     |      |
| TC1300001395.mm.1 | 3,72 Pfkp           | PSR1300008719.mm.1 | -2,75 | 0,01462  | 0,449914 Cassette Exon       | 0,2  |
| TC1300001395.mm.1 | 3,72 Pfkp           | PSR1300008773.mm.1 | -3,06 | 0,004479 | 0,367858 Cassette Exon       | 0,19 |
| TC1300001395.mm.1 | 3,72 Pfkp           | PSR1300008777.mm.1 | -3,2  | 0,011945 | 0,431753 Alternative 5' Donc | 0,33 |
| TC1300001395.mm.1 | 3,72 Pfkp           | PSR1300008766.mm.1 | -3,24 | 0,000892 | 0,313363 Cassette Exon       | 0,24 |
| TC1300001395.mm.1 | 3,72 Pfkp           | PSR1300008727.mm.1 | -3,31 | 0,00412  | 0,3623 Alternative 3' Acce   | 0,33 |
| TC1300001395.mm.1 | 3,72 Pfkp           | PSR1300008764.mm.1 | -3,38 | 0,003778 | 0,357586 Alternative 3' Acce | 0,29 |
| TC1300001395.mm.1 | 3,72 Pfkp           | PSR1300008718.mm.1 | -3,6  | 0,017569 | 0,464258 Cassette Exon       | 0,2  |
| TC1300001395.mm.1 | 3,72 Pfkp           | PSR1300008726.mm.1 | -3,71 | 0,016716 | 0,460202 Cassette Exon       | 0,28 |
| TC1300001395.mm.1 | 3,72 Pfkp           | JUC1300004551.mm.1 | -4,7  | 0,015362 | 0,453813                     |      |
| TC1300001395.mm.1 | 3,72 Pfkp           | JUC1300004555.mm.1 | -4,81 | 0,018598 | 0,469657                     |      |
| TC1300001395.mm.1 | 3,72 Pfkp           | JUC1300004552.mm.1 | -4,94 | 0,00308  | 0,353892                     |      |
| TC1700001600.mm.1 | -1,16 1520401A03Rik | PSR1700013984.mm.1 | 2,84  | 0,009526 | 0,416602 Cassette Exon       | 0,18 |
| TC1700001600.mm.1 | -1,16 1520401A03Rik | JUC1700007614.mm.1 | -2,45 | 0,001897 | 0,338712                     |      |
| TC1700001600.mm.1 | -1,16 1520401A03Rik | JUC1700007622.mm.1 | -2,45 | 0,001897 | 0,338712                     |      |
| TC0800002144.mm.1 | 1,26 Klkb1; Cyp4v3  | PSR0800016472.mm.1 | 2,84  | 0,012432 | 0,43528 Cassette Exon        | 0,12 |
| TC1300002146.mm.1 | -1,35 Ctsq          | JUC1300007144.mm.1 | 2,84  | 0,045858 | 0,555043                     |      |
| TC0800002404.mm.1 | -1,17 Pik3r2        | JUC0800009932.mm.1 | 2,84  | 0,025455 | 0,497549                     |      |
| TC0800002404.mm.1 | -1,17 Pik3r2        | JUC0800009930.mm.1 | -2,24 | 0,010671 | 0,423038                     |      |
| TC0400004074.mm.1 | 1,23 Per3           | JUC0400017716.mm.1 | 2,83  | 0,045232 | 0,553651                     |      |

|                   |                     |                    |       |          |          |                     |      |
|-------------------|---------------------|--------------------|-------|----------|----------|---------------------|------|
| TC0400004074.mm.1 | 1,23 Per3           | PSR0400033947.mm.1 | 2,31  | 0,006955 | 0,395722 | Cassette Exon       | 0,26 |
| TC1600001884.mm.1 | 1,56 Robo2          | JUC1600007678.mm.1 | 2,83  | 0,000533 | 0,304044 |                     |      |
| TC1600001884.mm.1 | 1,56 Robo2          | PSR1600014841.mm.1 | 2,65  | 0,002042 | 0,341377 | Cassette Exon       | 0,16 |
| TC1600001884.mm.1 | 1,56 Robo2          | JUC1600007682.mm.1 | 2,13  | 0,01306  | 0,439579 |                     |      |
| TC1600001884.mm.1 | 1,56 Robo2          | JUC1600007687.mm.1 | -2,5  | 0,039433 | 0,539618 |                     |      |
| TC1600000292.mm.1 | -1,11 Chrd          | JUC1600001517.mm.1 | 2,83  | 0,024706 | 0,494838 |                     |      |
| TC0800001023.mm.1 | -1,22 Cnep1r1       | JUC0800004158.mm.1 | 2,83  | 0,010341 | 0,421002 |                     |      |
| TC0700002749.mm.1 | -1,15 Wdr62         | JUC0700013020.mm.1 | 2,83  | 0,004662 | 0,370181 |                     |      |
| TC0700002749.mm.1 | -1,15 Wdr62         | JUC0700013031.mm.1 | -2,08 | 0,032409 | 0,519325 |                     |      |
| TC0400000576.mm.1 | -1,58 Nipsnap3b     | JUC0400002094.mm.1 | 2,83  | 0,021974 | 0,485125 |                     |      |
| TC0400000576.mm.1 | -1,58 Nipsnap3b     | JUC0400002091.mm.1 | 2,51  | 0,020311 | 0,477245 |                     |      |
| TC0Y00000321.mm.1 | -1,13 Gm20736       | JUC0Y00001501.mm.1 | 2,83  | 0,011772 | 0,430069 |                     |      |
| TC0400002035.mm.1 | 1,16 Cep104         | JUC0400008795.mm.1 | 2,83  | 0,024941 | 0,495859 |                     |      |
| TC0Y00000215.mm.1 | -1,13 Gm20736       | JUC0Y00000875.mm.1 | 2,83  | 0,011772 | 0,430069 |                     |      |
| TC0X00003040.mm.1 | 1,27 Gira4          | JUC0X00009640.mm.1 | 2,83  | 0,033829 | 0,523962 |                     |      |
| TC0X00003040.mm.1 | 1,27 Gira4          | JUC0X00009641.mm.1 | -2,18 | 0,012248 | 0,43367  |                     |      |
| TC0500002840.mm.1 | -1,98 Plac8         | PSR0500025033.mm.1 | 2,82  | 0,0058   | 0,383104 | Alternative 3' Acce | 0,27 |
| TC1100003562.mm.1 | 1,36 Cacna1g        | PSR1100032513.mm.1 | 2,82  | 0,007071 | 0,396677 | Cassette Exon       | 0,26 |
| TC1100003562.mm.1 | 1,36 Cacna1g        | PSR1100032536.mm.1 | -2,23 | 0,048372 | 0,56056  | Cassette Exon       | 0,12 |
| TC0300001092.mm.1 | 1,5 Kcnd3           | JUC0300004578.mm.1 | 2,82  | 0,021462 | 0,482404 |                     |      |
| TC0300001092.mm.1 | 1,5 Kcnd3           | PSR0300008820.mm.1 | 2,15  | 0,000983 | 0,31497  | Cassette Exon       | 0,13 |
| TC0300001092.mm.1 | 1,5 Kcnd3           | PSR0300008825.mm.1 | 2,14  | 0,044902 | 0,55271  | Cassette Exon       | 0,21 |
| TC0300001092.mm.1 | 1,5 Kcnd3           | JUC0300004577.mm.1 | -4,11 | 0,044652 | 0,552129 |                     |      |
| TC1000000906.mm.1 | 1,43 Ankrd24        | JUC1000003903.mm.1 | 2,82  | 0,015575 | 0,454968 |                     |      |
| TC1000000906.mm.1 | 1,43 Ankrd24        | JUC1000003922.mm.1 | -2,06 | 0,014578 | 0,449876 |                     |      |
| TC1000000906.mm.1 | 1,43 Ankrd24        | PSR1000007242.mm.1 | -2,08 | 0,001092 | 0,317225 | Alternative 3' Acce | 0,07 |
| TC1000000906.mm.1 | 1,43 Ankrd24        | PSR1000007230.mm.1 | -2,15 | 0,016406 | 0,458907 | Alternative 3' Acce | 0,17 |
| TC1000000906.mm.1 | 1,43 Ankrd24        | JUC1000003909.mm.1 | -2,41 | 0,023122 | 0,489756 |                     |      |
| TC1000000906.mm.1 | 1,43 Ankrd24        | PSR1000007261.mm.1 | -2,58 | 0,036876 | 0,532257 | Alternative 5' Donc | 0,16 |
| TC1200001235.mm.1 | -1,14 A230065H16Rik | JUC1200004765.mm.1 | 2,82  | 0,035095 | 0,527591 |                     |      |
| TC1300001244.mm.1 | -1,16 LOC102635797  | JUC1300004086.mm.1 | 2,82  | 0,031841 | 0,517877 |                     |      |
| TC0200003869.mm.1 | -1,32 Ctnnd1        | JUC0200017274.mm.1 | 2,82  | 0,040917 | 0,543423 |                     |      |
| TC0800001599.mm.1 | -1,11 Itgb1         | JUC0800007128.mm.1 | 2,82  | 0,007265 | 0,39826  |                     |      |
| TC0900001008.mm.1 | -1,45 Arpp19        | JUC0900004230.mm.1 | 2,82  | 0,044559 | 0,551921 |                     |      |
| TC0600001955.mm.1 | -1,19 Pot1a         | JUC0600008009.mm.1 | 2,82  | 0,028246 | 0,506552 |                     |      |
| TC0600001955.mm.1 | -1,19 Pot1a         | JUC0600008011.mm.1 | 2,69  | 0,045317 | 0,553774 |                     |      |
| TC0600003440.mm.1 | 1,05 Tm7sf3         | JUC0600014269.mm.1 | 2,82  | 0,013458 | 0,442805 |                     |      |
| TC0600003003.mm.1 | 1,08 Ankrd26        | JUC0600012004.mm.1 | 2,82  | 0,01582  | 0,45594  |                     |      |
| TC0600003003.mm.1 | 1,08 Ankrd26        | JUC0600012016.mm.1 | -2,16 | 0,006671 | 0,393187 |                     |      |
| TC0400000179.mm.1 | -1,14 Usp45         | JUC0400000558.mm.1 | 2,82  | 0,014828 | 0,451168 |                     |      |
| TC0400001105.mm.1 | -1,05 Usp24         | JUC0400003883.mm.1 | 2,82  | 0,042526 | 0,547845 |                     |      |
| TC0300002245.mm.1 | -1,33 Fhdc1         | JUC0300008900.mm.1 | 2,82  | 0,001634 | 0,332913 |                     |      |
| TC0400003383.mm.1 | -1,03 St3gal3       | JUC0400014186.mm.1 | 2,82  | 0,001165 | 0,318159 |                     |      |
| TC0400003383.mm.1 | -1,03 St3gal3       | JUC0400014191.mm.1 | -2,77 | 0,000849 | 0,311909 |                     |      |
| TC0400004104.mm.1 | 1,5 Ajap1           | JUC0400017842.mm.1 | 2,82  | 0,030492 | 0,513341 |                     |      |
| TC0400004104.mm.1 | 1,5 Ajap1           | JUC0400017846.mm.1 | -2,53 | 0,004589 | 0,369794 |                     |      |
| TC0400004104.mm.1 | 1,5 Ajap1           | JUC0400017843.mm.1 | -2,82 | 0,009063 | 0,412827 |                     |      |
| TC1000000473.mm.1 | 1,79 Slc35f1        | JUC1000001747.mm.1 | 2,82  | 0,0055   | 0,379939 |                     |      |

|                   |                              |                    |       |          |                              |      |
|-------------------|------------------------------|--------------------|-------|----------|------------------------------|------|
| TC100000473.mm.1  | 1,79 Slc35f1                 | JUC1000001745.mm.1 | 2,8   | 0,022342 | 0,486348                     |      |
| TC1100002072.mm.1 | -1,86 Gm12586                | JUC1100010463.mm.1 | 2,81  | 0,040299 | 0,541823                     |      |
| TC1100002072.mm.1 | -1,86 Gm12586                | PSR1100020047.mm.1 | 2,59  | 0,010509 | 0,422115 Cassette Exon       | 0,23 |
| TC1100003669.mm.1 | -1,01 Med1                   | PSR1100033819.mm.1 | 2,81  | 0,011935 | 0,431703 Cassette Exon       | 0,2  |
| TC1400002003.mm.1 | -1,59 4930597G03Rik; Gm3719  | PSR1400015051.mm.1 | 2,81  | 0,015584 | 0,454974 Cassette Exon       | 0,18 |
| TC0200004454.mm.1 | -1,45 Ehd4                   | JUC0200019138.mm.1 | 2,81  | 0,015564 | 0,454812                     |      |
| TC0200004454.mm.1 | -1,45 Ehd4                   | PSR0200037310.mm.1 | -2,35 | 0,013339 | 0,441924 Cassette Exon       | 0,16 |
| TC1200001761.mm.1 | 1,09 Gm2436                  | PSR1200012134.mm.1 | 2,81  | 0,04656  | 0,556761 Cassette Exon       | 0,16 |
| TC1200001762.mm.1 | 1,09 Gm2446                  | PSR1200012143.mm.1 | 2,81  | 0,04656  | 0,556761 Cassette Exon       | 0,16 |
| TC0200002272.mm.1 | -2,33 Slc52a3                | PSR0200017773.mm.1 | 2,81  | 0,034956 | 0,52724 Alternative 3' Acce  | 0,15 |
| TC0300000407.mm.1 | 1,38 Trpc4                   | JUC0300001428.mm.1 | 2,81  | 0,004832 | 0,371555                     |      |
| TC0300000407.mm.1 | 1,38 Trpc4                   | JUC0300001423.mm.1 | -2,07 | 0,028346 | 0,506843                     |      |
| TC0100002543.mm.1 | -1,73 Abca12                 | JUC0100011534.mm.1 | 2,81  | 0,01078  | 0,423955                     |      |
| TC0100002543.mm.1 | -1,73 Abca12                 | JUC0100011535.mm.1 | 2,25  | 0,025595 | 0,497814                     |      |
| TC0100000375.mm.1 | -1,35 Stat1                  | JUC0100001709.mm.1 | 2,81  | 0,024165 | 0,493245                     |      |
| TC1700000183.mm.1 | 1,19 Tbp                     | JUC1700000817.mm.1 | 2,81  | 0,004945 | 0,373282                     |      |
| TC1700000183.mm.1 | 1,19 Tbp                     | JUC1700000806.mm.1 | -2,13 | 0,014424 | 0,448786                     |      |
| TC1600000491.mm.1 | 1,24 Adcy5                   | JUC1600002447.mm.1 | 2,81  | 0,003073 | 0,353892                     |      |
| TC0900000720.mm.1 | 1,68 Sema7a                  | JUC0900002793.mm.1 | 2,81  | 0,012701 | 0,43642                      |      |
| TC0900000187.mm.1 | -1,23 1700084C06Rik          | JUC0900000598.mm.1 | 2,81  | 0,004071 | 0,361956                     |      |
| TC1100002729.mm.1 | 1,36 Uqcrq                   | JUC1100012873.mm.1 | 2,81  | 0,012556 | 0,435721                     |      |
| TC1100003382.mm.1 | -1,29 Slfn8                  | JUC1100016216.mm.1 | 2,81  | 0,018774 | 0,470789                     |      |
| TC1100001792.mm.1 | -1,8                         | JUC1100008820.mm.1 | 2,81  | 0,017538 | 0,464105                     |      |
| TC0X00000414.mm.1 | -1,33 Prr32; 1110059M19Rik   | JUC0X00001376.mm.1 | 2,81  | 0,033561 | 0,523131                     |      |
| TC0900002283.mm.1 | -1,44 Layn                   | JUC0900010743.mm.1 | 2,81  | 0,026622 | 0,50179                      |      |
| TC0900002283.mm.1 | -1,44 Layn                   | JUC0900010742.mm.1 | 2,46  | 0,001676 | 0,335182                     |      |
| TC1000000541.mm.1 | 1,09 Ascc1                   | JUC1000002008.mm.1 | 2,81  | 0,019397 | 0,473783                     |      |
| TC0100003175.mm.1 | 1,55 Lhx9                    | PSR0100025751.mm.1 | 2,8   | 0,046682 | 0,556849 Alternative 3' Acce | 0,29 |
| TC1300001666.mm.1 | 1,05 Gmnn                    | PSR1300010376.mm.1 | 2,8   | 0,04971  | 0,563531 Alternative 5' Donc | 0,29 |
| TC0400002105.mm.1 | 1,07 9430015G10Rik           | PSR0400017762.mm.1 | 2,8   | 0,000061 | 0,250119 Alternative 3' Acce | 0,28 |
| TC0100002561.mm.1 | -1,56                        | PSR0100020649.mm.1 | 2,8   | 0,033306 | 0,522389 Alternative 5' Donc | 0,27 |
| TC0100002561.mm.1 | -1,56                        | JUC0100011700.mm.1 | 2,57  | 0,005426 | 0,379494                     |      |
| TC0100002561.mm.1 | -1,56                        | PSR0100020645.mm.1 | 2,27  | 0,001344 | 0,325349 Cassette Exon       | 0,19 |
| TC1900001592.mm.1 | -1,39 9130011E15Rik          | PSR1900014161.mm.1 | 2,8   | 0,032512 | 0,519846 Cassette Exon       | 0,17 |
| TC1900001592.mm.1 | -1,39 9130011E15Rik          | PSR1900014158.mm.1 | 2,74  | 0,013588 | 0,443703 Cassette Exon       | 0,23 |
| TC1900001592.mm.1 | -1,39 9130011E15Rik          | JUC1900007821.mm.1 | 2,34  | 0,024231 | 0,493294                     |      |
| TC1900001592.mm.1 | -1,39 9130011E15Rik          | JUC1900007840.mm.1 | 2,23  | 0,020447 | 0,478018                     |      |
| TC0300001318.mm.1 | -1,02 Col25a1; 4930502M04Rik | PSR0300010687.mm.1 | 2,8   | 0,003286 | 0,354243 Cassette Exon       | 0,21 |
| TC0300001318.mm.1 | -1,02 Col25a1; 4930502M04Rik | PSR0300010667.mm.1 | 2,71  | 0,008351 | 0,406435 Cassette Exon       | 0,14 |
| TC0300001318.mm.1 | -1,02 Col25a1; 4930502M04Rik | JUC0300005579.mm.1 | 2,61  | 0,03088  | 0,51451                      |      |
| TC0500000247.mm.1 | -2,2 Gm7361                  | PSR0500001870.mm.1 | 2,8   | 0,033552 | 0,523131 Cassette Exon       | 0,18 |
| TC0500000247.mm.1 | -2,2 Gm7361                  | JUC0500001062.mm.1 | 2,24  | 0,01039  | 0,421341                     |      |
| TC0600002564.mm.1 | -1,17 Gm15624; LOC102635553  | PSR0600019899.mm.1 | 2,8   | 0,008068 | 0,404508 Cassette Exon       | 0,17 |
| TC0200005505.mm.1 | 1,76 4930402H24Rik; Gm1405   | JUC0200020576.mm.1 | 2,8   | 0,011994 | 0,432286                     |      |
| TC0200005505.mm.1 | 1,76 4930402H24Rik; Gm1405   | PSR0200039760.mm.1 | -2,21 | 0,029569 | 0,510456 Alternative 3' Acce | 0,14 |
| TC1400001886.mm.1 | -1,25 Gm5624                 | JUC1400007821.mm.1 | 2,8   | 0,009606 | 0,417256                     |      |
| TC0300000635.mm.1 | -1,06 Ctso                   | JUC0300002157.mm.1 | 2,8   | 0,000961 | 0,313363                     |      |
| TC1300000101.mm.1 | -1,03 Psma2                  | JUC1300000461.mm.1 | 2,8   | 0,029354 | 0,509995                     |      |

|                   |                              |                    |        |          |          |                          |
|-------------------|------------------------------|--------------------|--------|----------|----------|--------------------------|
| TC0100002801.mm.1 | -1,14 Per2                   | JUC0100012865.mm.1 | 2,8    | 0,024186 | 0,493294 |                          |
| TC1700001606.mm.1 | -1,36 Tceb2                  | JUC1700007672.mm.1 | 2,8    | 0,00296  | 0,352501 |                          |
| TC1900001649.mm.1 | 1,45 Sorcs1                  | JUC1900008137.mm.1 | 2,8    | 0,002727 | 0,349612 |                          |
| TC1900001649.mm.1 | 1,45 Sorcs1                  | JUC1900008132.mm.1 | 2,19   | 0,033234 | 0,522175 |                          |
| TC1800001449.mm.1 | -1,28 Piezo2                 | JUC1800005911.mm.1 | 2,8    | 0,031992 | 0,518312 |                          |
| TC1800001449.mm.1 | -1,28 Piezo2                 | JUC1800005942.mm.1 | 2,63   | 0,005062 | 0,375196 |                          |
| TC1800001384.mm.1 | -1,23 Fbn2                   | JUC1800005580.mm.1 | 2,8    | 0,016115 | 0,457756 |                          |
| TC1800001384.mm.1 | -1,23 Fbn2                   | JUC1800005613.mm.1 | -3,13  | 0,002555 | 0,349501 |                          |
| TC1500000558.mm.1 | 1,04 Zfp41                   | JUC1500002248.mm.1 | 2,8    | 0,028821 | 0,508362 |                          |
| TC1600001742.mm.1 | -1,21 Nfkbiz                 | JUC1600007343.mm.1 | 2,8    | 0,006437 | 0,390047 |                          |
| TC1600001047.mm.1 | -1,26 Dopey2                 | JUC1600004228.mm.1 | 2,8    | 0,007375 | 0,39943  |                          |
| TC0800000525.mm.1 | 1,34 Ufsp2                   | JUC0800001977.mm.1 | 2,8    | 0,020661 | 0,478862 |                          |
| TC0500000701.mm.1 | -1,06 Fip1l1                 | JUC0500003415.mm.1 | 2,8    | 0,034581 | 0,52602  |                          |
| TC0500000701.mm.1 | -1,06 Fip1l1                 | JUC0500003407.mm.1 | 2,37   | 0,016744 | 0,460378 |                          |
| TC0800002777.mm.1 | -1,19                        | JUC0800011630.mm.1 | 2,8    | 0,015446 | 0,454271 |                          |
| TC0800002869.mm.1 | -1,16 Pdf; Cog8              | JUC0800012090.mm.1 | 2,8    | 0,048272 | 0,560283 |                          |
| TC0700002790.mm.1 | -1,09 Hpn                    | JUC0700013377.mm.1 | 2,8    | 0,003318 | 0,354243 |                          |
| TC0600000556.mm.1 | 3,05 Atp6v0e2                | JUC0600002175.mm.1 | 2,8    | 0,010702 | 0,423331 |                          |
| TC0400004174.mm.1 | 1,13 Klhl17; Mir7658; mmu-mi | JUC0400018289.mm.1 | 2,8    | 0,007737 | 0,402774 |                          |
| TC0Y00000564.mm.1 | -1,11 Gm20835                | JUC0Y00001470.mm.1 | 2,8    | 0,020161 | 0,477086 |                          |
| TC1400000344.mm.1 | 1,56 Ogdhl                   | JUC1400001796.mm.1 | 2,79   | 0,036701 | 0,531756 |                          |
| TC1400000344.mm.1 | 1,56 Ogdhl                   | PSR1400003038.mm.1 | 2,77   | 0,029339 | 0,509981 | Cassette Exon 0,15       |
| TC1400000344.mm.1 | 1,56 Ogdhl                   | JUC1400001805.mm.1 | -2,51  | 0,007816 | 0,403089 |                          |
| TC1400000344.mm.1 | 1,56 Ogdhl                   | PSR1400003034.mm.1 | -3,35  | 0,014357 | 0,448293 | Alternative 3' Acce 0,4  |
| TC0400000280.mm.1 | 9,09 Gabrr1                  | PSR0400001830.mm.1 | 2,79   | 0,001783 | 0,336311 | Mutually Exclusive 0,3   |
| TC0400000280.mm.1 | 9,09 Gabrr1                  | PSR0400001836.mm.1 | -2,21  | 0,013254 | 0,441424 | Cassette Exon 0,37       |
| TC0400000280.mm.1 | 9,09 Gabrr1                  | PSR0400001828.mm.1 | -2,4   | 0,000761 | 0,308387 | Cassette Exon 0,29       |
| TC0400000280.mm.1 | 9,09 Gabrr1                  | PSR0400001831.mm.1 | -2,55  | 0,002889 | 0,352207 | Mutually Exclusive 0,18  |
| TC0400000280.mm.1 | 9,09 Gabrr1                  | PSR0400001837.mm.1 | -2,84  | 0,025786 | 0,498505 | Cassette Exon 0,31       |
| TC0400000280.mm.1 | 9,09 Gabrr1                  | PSR0400001829.mm.1 | -3     | 0,011001 | 0,425491 | Mutually Exclusive 0,3   |
| TC0400000280.mm.1 | 9,09 Gabrr1                  | JUC0400000911.mm.1 | -3,31  | 0,001619 | 0,332831 |                          |
| TC0400000280.mm.1 | 9,09 Gabrr1                  | PSR0400001827.mm.1 | -3,61  | 0,016497 | 0,459419 | Cassette Exon 0,29       |
| TC0400000280.mm.1 | 9,09 Gabrr1                  | JUC0400000918.mm.1 | -3,66  | 0,002247 | 0,34578  |                          |
| TC0400000280.mm.1 | 9,09 Gabrr1                  | JUC0400000919.mm.1 | -12,17 | 0,001271 | 0,322251 |                          |
| TC1700000407.mm.1 | 2,15 Rgs11                   | JUC1700001865.mm.1 | 2,79   | 0,002118 | 0,342919 |                          |
| TC1700000407.mm.1 | 2,15 Rgs11                   | PSR1700003449.mm.1 | 2,43   | 0,001756 | 0,335996 | Cassette Exon 0,26       |
| TC1700000407.mm.1 | 2,15 Rgs11                   | JUC1700001864.mm.1 | 2,09   | 0,020129 | 0,476862 |                          |
| TC1700000407.mm.1 | 2,15 Rgs11                   | JUC1700001879.mm.1 | -2,04  | 0,011273 | 0,426793 |                          |
| TC1700000407.mm.1 | 2,15 Rgs11                   | PSR1700003438.mm.1 | -2,08  | 0,006598 | 0,39213  | Intron Retention 0,27    |
| TC1700000407.mm.1 | 2,15 Rgs11                   | PSR1700003460.mm.1 | -2,12  | 0,010668 | 0,423012 | Cassette Exon 0,1        |
| TC1700000407.mm.1 | 2,15 Rgs11                   | JUC1700001878.mm.1 | -2,26  | 0,042474 | 0,547627 |                          |
| TC1700000407.mm.1 | 2,15 Rgs11                   | JUC1700001863.mm.1 | -2,34  | 0,029475 | 0,510123 |                          |
| TC1700000407.mm.1 | 2,15 Rgs11                   | PSR1700003459.mm.1 | -2,44  | 0,003778 | 0,357586 | Alternative 3' Acce 0,05 |
| TC1700000407.mm.1 | 2,15 Rgs11                   | PSR1700003436.mm.1 | -2,75  | 0,004855 | 0,37168  | Alternative 3' Acce 0,19 |
| TC1700000407.mm.1 | 2,15 Rgs11                   | JUC1700001876.mm.1 | -2,88  | 0,0087   | 0,409002 |                          |
| TC1600001661.mm.1 | -1,08 Tmprss7                | JUC1600007082.mm.1 | 2,79   | 0,010415 | 0,42148  |                          |
| TC1600001661.mm.1 | -1,08 Tmprss7                | PSR1600013583.mm.1 | 2,01   | 0,046293 | 0,556186 | Cassette Exon 0,09       |
| TC1200001597.mm.1 | -1,19 Bcap29                 | JUC1200006129.mm.1 | 2,79   | 0,033325 | 0,522415 |                          |

|                   |                              |                    |        |          |                              |      |
|-------------------|------------------------------|--------------------|--------|----------|------------------------------|------|
| TC1200002108.mm.1 | 1,02 Angel1                  | JUC1200008052.mm.1 | 2,79   | 0,010692 | 0,423294                     |      |
| TC0200004455.mm.1 | -1,13 Pla2g4e; Gm13997       | JUC0200019151.mm.1 | 2,79   | 0,013784 | 0,444974                     |      |
| TC0200004455.mm.1 | -1,13 Pla2g4e; Gm13997       | JUC0200019147.mm.1 | 2,3    | 0,041204 | 0,544126                     |      |
| TC1800001672.mm.1 | 1,09 4930594M17Rik           | JUC1800006680.mm.1 | 2,79   | 0,029213 | 0,509515                     |      |
| TC1900000817.mm.1 | -1,21                        | JUC1900003927.mm.1 | 2,79   | 0,015695 | 0,455416                     |      |
| TC0200000036.mm.1 | 1,26 Sephs1                  | JUC0200000129.mm.1 | 2,79   | 0,019295 | 0,473074                     |      |
| TC0500001261.mm.1 | 1,07 Pla2g1b                 | JUC0500005941.mm.1 | 2,79   | 0,04793  | 0,559506                     |      |
| TC0600002912.mm.1 | 1,35 Lhfp14                  | JUC0600011595.mm.1 | 2,79   | 0,031704 | 0,517443                     |      |
| TC0600000362.mm.1 | -1,17 Trim24                 | JUC0600001407.mm.1 | 2,79   | 0,032264 | 0,519058                     |      |
| TC1000001767.mm.1 | -1,48 Ltv1                   | JUC1000007001.mm.1 | 2,79   | 0,002477 | 0,349135                     |      |
| TC0300001485.mm.1 | -1,4 2410004B18Rik           | JUC0300006324.mm.1 | 2,79   | 0,021301 | 0,481714                     |      |
| TC1000000372.mm.1 | 1,09 Sesn1                   | JUC1000001419.mm.1 | 2,79   | 0,032912 | 0,521149                     |      |
| TC0700000832.mm.1 | 9,65 Slc17a7                 | JUC0700003520.mm.1 | 2,78   | 0,001116 | 0,317328                     |      |
| TC0700000832.mm.1 | 9,65 Slc17a7                 | JUC0700003523.mm.1 | -2,28  | 0,005812 | 0,383104                     |      |
| TC0700000832.mm.1 | 9,65 Slc17a7                 | JUC0700003526.mm.1 | -3,02  | 0,035248 | 0,52837                      |      |
| TC0700000832.mm.1 | 9,65 Slc17a7                 | PSR0700007123.mm.1 | -4,5   | 0,022156 | 0,48561 Intron Retention     | 0,38 |
| TC0700000832.mm.1 | 9,65 Slc17a7                 | PSR0700007133.mm.1 | -5,68  | 0,025354 | 0,497395 Alternative 5' Donc | 0,45 |
| TC0700000832.mm.1 | 9,65 Slc17a7                 | PSR0700007127.mm.1 | -5,84  | 0,015425 | 0,454071 Intron Retention    | 0,71 |
| TC0700000832.mm.1 | 9,65 Slc17a7                 | JUC0700003517.mm.1 | -6,39  | 0,025767 | 0,498444                     |      |
| TC0700000832.mm.1 | 9,65 Slc17a7                 | PSR0700007125.mm.1 | -6,85  | 0,005993 | 0,386404 Intron Retention    | 0,75 |
| TC0700000832.mm.1 | 9,65 Slc17a7                 | PSR0700007131.mm.1 | -6,93  | 0,007079 | 0,396891 Intron Retention    | 0,7  |
| TC0700000832.mm.1 | 9,65 Slc17a7                 | PSR0700007119.mm.1 | -7,7   | 0,022974 | 0,48884 Cassette Exon        | 0,27 |
| TC0700000832.mm.1 | 9,65 Slc17a7                 | PSR0700007129.mm.1 | -12,16 | 0,006277 | 0,388804 Intron Retention    | 0,69 |
| TC0800001362.mm.1 | 1,3 Wwox                     | JUC0800006120.mm.1 | 2,78   | 0,007702 | 0,402552                     |      |
| TC0800001362.mm.1 | 1,3 Wwox                     | JUC0800006132.mm.1 | -2,36  | 0,030722 | 0,514036                     |      |
| TC0800001362.mm.1 | 1,3 Wwox                     | PSR0800011226.mm.1 | -2,84  | 0,007577 | 0,401703 Alternative 5' Donc | 0,23 |
| TC1100004115.mm.1 | 2,1 Foxj1; Rnf157            | PSR1100038958.mm.1 | 2,78   | 0,006588 | 0,39213 Cassette Exon        | 0,16 |
| TC1100004115.mm.1 | 2,1 Foxj1; Rnf157            | PSR1100038949.mm.1 | 2,25   | 0,032621 | 0,520338 Cassette Exon       | 0,13 |
| TC1100004115.mm.1 | 2,1 Foxj1; Rnf157            | JUC1100020439.mm.1 | -2,08  | 0,041835 | 0,545586                     |      |
| TC1100004115.mm.1 | 2,1 Foxj1; Rnf157            | PSR1100038912.mm.1 | -2,32  | 0,040454 | 0,542112 Cassette Exon       | 0,12 |
| TC1100004115.mm.1 | 2,1 Foxj1; Rnf157            | PSR1100038913.mm.1 | -2,67  | 0,027935 | 0,505612 Intron Retention    | 0,13 |
| TC1100004115.mm.1 | 2,1 Foxj1; Rnf157            | JUC1100020419.mm.1 | -2,92  | 0,010529 | 0,42227                      |      |
| TC1100004115.mm.1 | 2,1 Foxj1; Rnf157            | PSR1100038961.mm.1 | -2,98  | 0,01748  | 0,463933 Alternative 5' Donc | 0,19 |
| TC0Y00000341.mm.1 | -1,45 LOC101055632; 1700040F | PSR0Y00002054.mm.1 | 2,78   | 0,014861 | 0,451623 Cassette Exon       | 0,18 |
| TC0Y00000341.mm.1 | -1,45 LOC101055632; 1700040F | JUC0Y00001576.mm.1 | 2,46   | 0,006216 | 0,387912                     |      |
| TC0400002097.mm.1 | -2,06 Cpsf3l                 | PSR0400017550.mm.1 | 2,78   | 0,038985 | 0,537923 Cassette Exon       | 0,17 |
| TC1600001024.mm.1 | 1,07 Kcne2                   | PSR1600008024.mm.1 | 2,78   | 0,002703 | 0,349612 Cassette Exon       | 0,14 |
| TC1600001024.mm.1 | 1,07 Kcne2                   | JUC1600004160.mm.1 | 2,34   | 0,010048 | 0,418902                     |      |
| TC1200000348.mm.1 | -1,11 Etv1; Gm5454           | JUC1200001433.mm.1 | 2,78   | 0,001782 | 0,336311                     |      |
| TC1200000348.mm.1 | -1,11 Etv1; Gm5454           | JUC1200001437.mm.1 | 2,23   | 0,000379 | 0,293183                     |      |
| TC0200001365.mm.1 | -1,19 Rapsn                  | JUC0200005252.mm.1 | 2,78   | 0,003861 | 0,358861                     |      |
| TC0200002201.mm.1 | -1,37 Cst8                   | JUC0200008770.mm.1 | 2,78   | 0,02504  | 0,496116                     |      |
| TC0500000690.mm.1 | -1,12 Spata18                | JUC0500003369.mm.1 | 2,78   | 0,018893 | 0,471219                     |      |
| TC0500000690.mm.1 | -1,12 Spata18                | JUC0500003370.mm.1 | 2,68   | 0,001404 | 0,325997                     |      |
| TC0700003414.mm.1 | 1,58 Fam189a1                | JUC0700015382.mm.1 | 2,78   | 0,027146 | 0,503137                     |      |
| TC1100000596.mm.1 | -1,41 Fstl4                  | JUC1100002432.mm.1 | 2,78   | 0,01263  | 0,436139                     |      |
| TC1000001584.mm.1 | 1,44 Atp5b                   | JUC1000006161.mm.1 | 2,78   | 0,04339  | 0,54959                      |      |
| TC0300002358.mm.1 | 1,13 Atp8b2                  | JUC0300009536.mm.1 | 2,78   | 0,004918 | 0,372872                     |      |

|                   |                                 |                    |       |          |          |                     |      |
|-------------------|---------------------------------|--------------------|-------|----------|----------|---------------------|------|
| TC0300002358.mm.1 | 1,13 Atp8b2                     | JUC0300009540.mm.1 | 2,58  | 0,010569 | 0,422432 |                     |      |
| TC0900003015.mm.1 | 1,52 Grm2                       | JUC0900014052.mm.1 | 2,78  | 0,000186 | 0,284485 |                     |      |
| TC0400001544.mm.1 | -1,29 Snrnp40                   | JUC0400006345.mm.1 | 2,78  | 0,02705  | 0,502979 |                     |      |
| TC0400001544.mm.1 | -1,29 Snrnp40                   | JUC0400006341.mm.1 | 2,38  | 0,027893 | 0,505612 |                     |      |
| TC0X00002706.mm.1 | -2,06 Pdzd11                    | JUC0X00008604.mm.1 | 2,78  | 0,012318 | 0,434392 |                     |      |
| TC0500002232.mm.1 | 1,97 Zfyve28                    | JUC0500011129.mm.1 | 2,77  | 0,009134 | 0,413353 |                     |      |
| TC0500002232.mm.1 | 1,97 Zfyve28                    | PSR0500020402.mm.1 | 2,63  | 0,014337 | 0,448173 | Mutually Exclusive  | 0,18 |
| TC0500002232.mm.1 | 1,97 Zfyve28                    | PSR0500020395.mm.1 | 2,63  | 0,000305 | 0,288663 | Cassette Exon       | 0,12 |
| TC0500002232.mm.1 | 1,97 Zfyve28                    | PSR0500020393.mm.1 | 2,44  | 0,006591 | 0,39213  | Alternative 3' Acce | 0,2  |
| TC0500002232.mm.1 | 1,97 Zfyve28                    | JUC0500011130.mm.1 | 2,17  | 0,001703 | 0,335511 |                     |      |
| TC0500002232.mm.1 | 1,97 Zfyve28                    | PSR0500020401.mm.1 | -2,18 | 0,037311 | 0,533573 | Mutually Exclusive  | 0,18 |
| TC0500002232.mm.1 | 1,97 Zfyve28                    | PSR0500020408.mm.1 | -2,46 | 0,010019 | 0,418618 | Cassette Exon       | 0,28 |
| TC0500002232.mm.1 | 1,97 Zfyve28                    | JUC0500011128.mm.1 | -2,9  | 0,024951 | 0,495859 |                     |      |
| TC0500002232.mm.1 | 1,97 Zfyve28                    | JUC0500011134.mm.1 | -2,97 | 0,0064   | 0,389654 |                     |      |
| TC0500002232.mm.1 | 1,97 Zfyve28                    | JUC0500011141.mm.1 | -3,21 | 0,019445 | 0,474131 |                     |      |
| TC0600001288.mm.1 | 1,29 lft122                     | PSR0600010165.mm.1 | 2,77  | 0,015371 | 0,453849 | Alternative 3' Acce | 0,28 |
| TC0600001288.mm.1 | 1,29 lft122                     | JUC0600005281.mm.1 | 2,15  | 0,043097 | 0,548553 |                     |      |
| TC0600001288.mm.1 | 1,29 lft122                     | PSR0600010164.mm.1 | -2,02 | 0,033251 | 0,52224  | Alternative 3' Acce | 0,16 |
| TC0600001288.mm.1 | 1,29 lft122                     | PSR0600010195.mm.1 | -2,17 | 0,026254 | 0,500323 | Alternative 3' Acce | 0,2  |
| TC1900001599.mm.1 | 3,28 Psd                        | PSR1900014227.mm.1 | 2,77  | 0,000551 | 0,304044 | Mutually Exclusive  | 0,22 |
| TC1900001599.mm.1 | 3,28 Psd                        | PSR1900014233.mm.1 | 2,65  | 0,008462 | 0,406624 | Cassette Exon       | 0,21 |
| TC1900001599.mm.1 | 3,28 Psd                        | PSR1900014240.mm.1 | 2,14  | 0,020324 | 0,477245 |                     |      |
| TC1900001599.mm.1 | 3,28 Psd                        | PSR1900014222.mm.1 | -2,42 | 0,024678 | 0,49472  | Cassette Exon       | 0,13 |
| TC1900001599.mm.1 | 3,28 Psd                        | JUC1900007879.mm.1 | -2,82 | 0,00797  | 0,403853 |                     |      |
| TC1900001599.mm.1 | 3,28 Psd                        | PSR1900014228.mm.1 | -2,96 | 0,005723 | 0,382767 | Mutually Exclusive  | 0,22 |
| TC1900001599.mm.1 | 3,28 Psd                        | JUC1900007881.mm.1 | -3,26 | 0,032133 | 0,518586 |                     |      |
| TC1900001599.mm.1 | 3,28 Psd                        | JUC1900007878.mm.1 | -3,31 | 0,01625  | 0,458312 |                     |      |
| TC1900001599.mm.1 | 3,28 Psd                        | PSR1900014229.mm.1 | -3,44 | 0,006344 | 0,389463 | Cassette Exon       | 0,23 |
| TC1900001599.mm.1 | 3,28 Psd                        | PSR1900014243.mm.1 | -4,01 | 0,004421 | 0,366832 | Cassette Exon       | 0,28 |
| TC0300003237.mm.1 | -1,52 Mtx1                      | PSR0300017903.mm.1 | 2,77  | 0,011092 | 0,425947 | Alternative 5' Donc | 0,27 |
| TC0300003237.mm.1 | -1,52 Mtx1                      | PSR0300017904.mm.1 | 2,45  | 0,028057 | 0,505951 |                     |      |
| TC0300003237.mm.1 | -1,52 Mtx1                      | PSR0300017886.mm.1 | 2,17  | 0,03594  | 0,529399 | Alternative 3' Acce | 0,15 |
| TC0400003478.mm.1 | -1,35 Ppie                      | PSR0400028188.mm.1 | 2,77  | 0,00185  | 0,337414 | Alternative 3' Acce | 0,24 |
| TC0200001741.mm.1 | 1,46 Bub1b                      | JUC0200006427.mm.1 | 2,77  | 0,009561 | 0,416927 |                     |      |
| TC0200001741.mm.1 | 1,46 Bub1b                      | PSR0200012894.mm.1 | 2,02  | 0,031403 | 0,516484 | Alternative 5' Donc | 0,16 |
| TC0200001741.mm.1 | 1,46 Bub1b                      | PSR0200012880.mm.1 | -2,68 | 0,009187 | 0,413756 | Cassette Exon       | 0,18 |
| TC0200002026.mm.1 | -1,05 Prnd; Prnp; Prn; RP23-401 | PSR0200016115.mm.1 | 2,77  | 0,003422 | 0,355303 | Cassette Exon       | 0,17 |
| TC0200002026.mm.1 | -1,05 Prnd; Prnp; Prn; RP23-401 | PSR0200016121.mm.1 | 2,15  | 0,045973 | 0,555395 | Cassette Exon       | 0,11 |
| TC0200002026.mm.1 | -1,05 Prnd; Prnp; Prn; RP23-401 | PSR0200016123.mm.1 | 2,12  | 0,013747 | 0,444758 | Cassette Exon       | 0,11 |
| TC0400000743.mm.1 | -1,76 Tlr4                      | PSR0400005325.mm.1 | 2,77  | 0,018306 | 0,468049 | Cassette Exon       | 0,17 |
| TC0400002530.mm.1 | -1,64 Tln1                      | JUC0400010738.mm.1 | 2,77  | 0,031494 | 0,516965 |                     |      |
| TC0400002530.mm.1 | -1,64 Tln1                      | PSR0400020601.mm.1 | 2,52  | 0,024362 | 0,49362  | Cassette Exon       | 0,17 |
| TC0400002530.mm.1 | -1,64 Tln1                      | JUC0400010719.mm.1 | 2,14  | 0,008667 | 0,408649 |                     |      |
| TC0200005360.mm.1 | 1,02 Gm14410; Gm14411; Gm1      | PSR0200045648.mm.1 | 2,77  | 0,028455 | 0,507299 | Cassette Exon       | 0,16 |
| TC0X00003430.mm.1 | -1,32 Arhgap4                   | JUC0X00007787.mm.1 | 2,77  | 0,00172  | 0,335996 |                     |      |
| TC0X00003430.mm.1 | -1,32 Arhgap4                   | PSR0X00015214.mm.1 | 2,1   | 0,008724 | 0,409361 | Cassette Exon       | 0,14 |
| TC0X00003430.mm.1 | -1,32 Arhgap4                   | PSR0X00015201.mm.1 | 2,03  | 0,032011 | 0,518367 | Alternative 5' Donc | 0,14 |
| TC0900003311.mm.1 | 1,6 Fyco1; Gm17021              | JUC0900015710.mm.1 | 2,77  | 0,024954 | 0,495885 |                     |      |

|                   |                         |                    |        |          |                              |      |
|-------------------|-------------------------|--------------------|--------|----------|------------------------------|------|
| TC0900003311.mm.1 | 1,6 Fyco1; Gm17021      | PSR0900027966.mm.1 | 2,23   | 0,036432 | 0,530967 Cassette Exon       | 0,12 |
| TC1900000118.mm.1 | -1,12 Rasgrp2           | JUC1900000810.mm.1 | 2,77   | 0,025662 | 0,498118                     |      |
| TC0800001236.mm.1 | 1,13 Dus2; Dus2l        | JUC0800005380.mm.1 | 2,77   | 0,003714 | 0,357586                     |      |
| TC0900001011.mm.1 | -1,11 Myo5c             | JUC0900004310.mm.1 | 2,77   | 0,022707 | 0,487767                     |      |
| TC0900001011.mm.1 | -1,11 Myo5c             | JUC0900004325.mm.1 | 2,12   | 0,024654 | 0,49468                      |      |
| TC1100000654.mm.1 | 3,72 Gria1              | JUC1100002742.mm.1 | 2,76   | 0,002445 | 0,349135                     |      |
| TC1100000654.mm.1 | 3,72 Gria1              | PSR1100005290.mm.1 | 2,25   | 0,032857 | 0,521076 Cassette Exon       | 0,25 |
| TC1100000654.mm.1 | 3,72 Gria1              | JUC1100002741.mm.1 | -2,2   | 0,046725 | 0,556856                     |      |
| TC1100000654.mm.1 | 3,72 Gria1              | JUC1100002738.mm.1 | -2,87  | 0,024078 | 0,49304                      |      |
| TC1100000654.mm.1 | 3,72 Gria1              | PSR1100005276.mm.1 | -3,02  | 0,031789 | 0,517596 Cassette Exon       | 0,2  |
| TC1100000654.mm.1 | 3,72 Gria1              | PSR1100005279.mm.1 | -4,96  | 0,041755 | 0,545454 Cassette Exon       | 0,3  |
| TC0200003365.mm.1 | -1,27 Ggta1             | PSR0200028965.mm.1 | 2,76   | 0,015738 | 0,455416 Cassette Exon       | 0,16 |
| TC0X00003069.mm.1 | -1,54 Nup62cl           | PSR0X00019282.mm.1 | 2,76   | 0,027908 | 0,505612 Cassette Exon       | 0,16 |
| TC0X00003069.mm.1 | -1,54 Nup62cl           | JUC0X00009767.mm.1 | 2,5    | 0,020637 | 0,478837                     |      |
| TC1300000708.mm.1 | -1,22 1700066J03Rik     | JUC1300002436.mm.1 | 2,76   | 0,007719 | 0,402552                     |      |
| TC0800003009.mm.1 | -1,17 Pkd1l2            | JUC0800012680.mm.1 | 2,76   | 0,004574 | 0,369789                     |      |
| TC0500000093.mm.1 | 1,55 Sema3e             | JUC0500000469.mm.1 | 2,76   | 0,000362 | 0,290942                     |      |
| TC0X00002068.mm.1 | -1,37 Rhox2g            | JUC0X00006699.mm.1 | 2,76   | 0,002724 | 0,349612                     |      |
| TC1100002557.mm.1 | 6,03 Gabra1             | JUC1100012317.mm.1 | 2,75   | 0,001281 | 0,322251                     |      |
| TC1100002557.mm.1 | 6,03 Gabra1             | JUC1100012316.mm.1 | 2,54   | 0,002081 | 0,34222                      |      |
| TC1100002557.mm.1 | 6,03 Gabra1             | PSR1100023663.mm.1 | 2,43   | 0,001841 | 0,337414 Cassette Exon       | 0,12 |
| TC1100002557.mm.1 | 6,03 Gabra1             | JUC1100012313.mm.1 | -2,12  | 0,010841 | 0,424161                     |      |
| TC1100002557.mm.1 | 6,03 Gabra1             | PSR1100023668.mm.1 | -2,15  | 0,001131 | 0,317328 Cassette Exon       | 0,04 |
| TC1100002557.mm.1 | 6,03 Gabra1             | PSR1100023654.mm.1 | -2,85  | 0,027667 | 0,504707 Alternative 3' Acce | 0,25 |
| TC1100002557.mm.1 | 6,03 Gabra1             | JUC1100012318.mm.1 | -3     | 0,039963 | 0,540973                     |      |
| TC1100002557.mm.1 | 6,03 Gabra1             | PSR1100023671.mm.1 | -3,52  | 0,001593 | 0,331726 Cassette Exon       | 0,37 |
| TC1100002557.mm.1 | 6,03 Gabra1             | JUC1100012321.mm.1 | -4,08  | 0,0321   | 0,518557                     |      |
| TC1100002557.mm.1 | 6,03 Gabra1             | JUC1100012323.mm.1 | -4,68  | 0,031832 | 0,517847                     |      |
| TC1100002557.mm.1 | 6,03 Gabra1             | PSR1100023669.mm.1 | -5,05  | 0,015366 | 0,453849 Cassette Exon       | 0,21 |
| TC1100002557.mm.1 | 6,03 Gabra1             | PSR1100023674.mm.1 | -5,33  | 0,010584 | 0,42255 Alternative 5' Donc  | 0,38 |
| TC1100002557.mm.1 | 6,03 Gabra1             | PSR1100023677.mm.1 | -5,48  | 0,008256 | 0,405976 Alternative 5' Donc | 0,38 |
| TC1100002557.mm.1 | 6,03 Gabra1             | JUC1100012324.mm.1 | -6,34  | 0,035688 | 0,529027                     |      |
| TC1100002557.mm.1 | 6,03 Gabra1             | PSR1100023676.mm.1 | -11,05 | 0,005718 | 0,382767 Alternative 5' Donc | 0,38 |
| TC1100002557.mm.1 | 6,03 Gabra1             | PSR1100023666.mm.1 | -15,37 | 0,005325 | 0,378059 Cassette Exon       | 0,27 |
| TC0200004102.mm.1 | -1,18 Ndufs3            | PSR0200034231.mm.1 | 2,75   | 0,003761 | 0,357586 Alternative 3' Acce | 0,28 |
| TC1000002482.mm.1 | 1,21 BC005764           | PSR1000018180.mm.1 | 2,75   | 0,020137 | 0,476995 Cassette Exon       | 0,14 |
| TC1000002482.mm.1 | 1,21 BC005764           | JUC1000009977.mm.1 | -2,6   | 0,045149 | 0,553323                     |      |
| TC1000002482.mm.1 | 1,21 BC005764           | PSR1000018162.mm.1 | -2,93  | 0,045118 | 0,553234 Cassette Exon       | 0,25 |
| TC0X00002593.mm.1 | 2,09 Mir1906-2; Gm27000 | PSR0X00016306.mm.1 | 2,75   | 0,00138  | 0,32572 Alternative 3' Acce  | 0,17 |
| TC0X00002593.mm.1 | 2,09 Mir1906-2; Gm27000 | PSR0X00016308.mm.1 | 2,41   | 0,024792 | 0,495094 Alternative 5' Donc | 0,23 |
| TC0400003076.mm.1 | -1,71 Mym1              | JUC0400012813.mm.1 | 2,75   | 0,036708 | 0,531762                     |      |
| TC0400003076.mm.1 | -1,71 Mym1              | PSR0400024629.mm.1 | 2,32   | 0,011625 | 0,429746 Alternative 3' Acce | 0,19 |
| TC1100003559.mm.1 | 1,18 Luc7l3             | PSR1100032448.mm.1 | 2,75   | 0,00587  | 0,383835 Cassette Exon       | 0,14 |
| TC1100003559.mm.1 | 1,18 Luc7l3             | PSR1100032442.mm.1 | -2,13  | 0,035181 | 0,528125 Alternative 5' Donc | 0,18 |
| TC1100003559.mm.1 | 1,18 Luc7l3             | JUC1100016952.mm.1 | -3,74  | 0,019571 | 0,474672                     |      |
| TC1100003559.mm.1 | 1,18 Luc7l3             | JUC1100016949.mm.1 | -4,01  | 0,020463 | 0,478018                     |      |
| TC1100001572.mm.1 | -2,24                   | PSR1100014579.mm.1 | 2,75   | 0,031656 | 0,517405 Cassette Exon       | 0,16 |
| TC1100001572.mm.1 | -2,24                   | PSR1100014580.mm.1 | 2,25   | 0,023549 | 0,490947 Cassette Exon       | 0,14 |



|                   |                     |                    |       |          |                              |      |
|-------------------|---------------------|--------------------|-------|----------|------------------------------|------|
| TC1200001512.mm.1 | 1,66 Gm9292         | PSR1200010578.mm.1 | 2,75  | 0,017386 | 0,463704 Cassette Exon       | 0,09 |
| TC1500001104.mm.1 | -1,3                | JUC1500005046.mm.1 | 2,75  | 0,001992 | 0,341091                     |      |
| TC0600000917.mm.1 | -1,1 Dqx1           | JUC0600003477.mm.1 | 2,75  | 0,031761 | 0,517489                     |      |
| TC0700001212.mm.1 | -1,3 2610206C17Rik  | JUC0700005526.mm.1 | 2,75  | 0,003556 | 0,356223                     |      |
| TC0600002472.mm.1 | 1,31 Kdm3a          | JUC0600009914.mm.1 | 2,75  | 0,037664 | 0,53431                      |      |
| TC0600003373.mm.1 | 1,03 Recql          | JUC0600013877.mm.1 | 2,75  | 0,005727 | 0,382767                     |      |
| TC0600001644.mm.1 | -1,14               | JUC0600006863.mm.1 | 2,75  | 0,029121 | 0,509241                     |      |
| TC0700001356.mm.1 | 1,04 Rsf1           | JUC0700005939.mm.1 | 2,75  | 0,034044 | 0,524583                     |      |
| TC0700002062.mm.1 | -1,4 Muc5ac         | JUC0700009772.mm.1 | 2,75  | 0,020246 | 0,477245                     |      |
| TC0700002062.mm.1 | -1,4 Muc5ac         | JUC0700009792.mm.1 | 2,31  | 0,01928  | 0,473074                     |      |
| TC0700002062.mm.1 | -1,4 Muc5ac         | JUC0700009764.mm.1 | -2,09 | 0,027668 | 0,504707                     |      |
| TC1100002462.mm.1 | -1,45               | JUC1100011908.mm.1 | 2,75  | 0,006286 | 0,388916                     |      |
| TC0400001437.mm.1 | 1,35 Meaf6          | JUC0400005682.mm.1 | 2,75  | 0,023418 | 0,490343                     |      |
| TC1500001060.mm.1 | 3,45 Ankrd33        | JUC1500004770.mm.1 | 2,74  | 0,001536 | 0,330388                     |      |
| TC1500001060.mm.1 | 3,45 Ankrd33        | PSR1500008414.mm.1 | -3,24 | 0,01097  | 0,42518 Cassette Exon        | 0,34 |
| TC1500001060.mm.1 | 3,45 Ankrd33        | JUC1500004772.mm.1 | -4,07 | 0,005952 | 0,385276                     |      |
| TC1200002263.mm.1 | -1,82 Asb2          | PSR1200015725.mm.1 | 2,74  | 0,015099 | 0,452453 Alternative 5' Donc | 0,29 |
| TC1300001775.mm.1 | -1,11 Serpinb6e     | JUC1300005643.mm.1 | 2,74  | 0,008734 | 0,409583                     |      |
| TC1300001775.mm.1 | -1,11 Serpinb6e     | PSR1300011050.mm.1 | -3,76 | 0,019141 | 0,472472 Cassette Exon       | 0,29 |
| TC1900000628.mm.1 | 2,34 Cnnm1          | JUC1900002970.mm.1 | 2,74  | 0,015811 | 0,455923                     |      |
| TC1900000628.mm.1 | 2,34 Cnnm1          | PSR1900005580.mm.1 | -2,14 | 0,036711 | 0,531762 Cassette Exon       | 0,06 |
| TC1900000628.mm.1 | 2,34 Cnnm1          | PSR1900005581.mm.1 | -2,35 | 0,000631 | 0,304044 Cassette Exon       | 0,1  |
| TC1900000628.mm.1 | 2,34 Cnnm1          | PSR1900005578.mm.1 | -2,54 | 0,011428 | 0,427656 Cassette Exon       | 0,29 |
| TC1900000628.mm.1 | 2,34 Cnnm1          | JUC1900002976.mm.1 | -3,51 | 0,003197 | 0,354243                     |      |
| TC0100000765.mm.1 | -1,39 Sp140; Gm2427 | JUC0100003626.mm.1 | 2,74  | 0,003791 | 0,357817                     |      |
| TC0100000765.mm.1 | -1,39 Sp140; Gm2427 | PSR0100006332.mm.1 | 2,12  | 0,004511 | 0,368648 Cassette Exon       | 0,19 |
| TC0100000765.mm.1 | -1,39 Sp140; Gm2427 | JUC0100003639.mm.1 | 2,02  | 0,048479 | 0,560864                     |      |
| TC0400001721.mm.1 | 1,14 Sh2d5; Kif17   | PSR0400014046.mm.1 | 2,74  | 0,017463 | 0,463886 Cassette Exon       | 0,18 |
| TC0400001721.mm.1 | 1,14 Sh2d5; Kif17   | PSR0400014045.mm.1 | 2,31  | 0,002656 | 0,349612 Cassette Exon       | 0,18 |
| TC1400000340.mm.1 | 1,06 Ncoa4          | JUC1400001755.mm.1 | 2,74  | 0,038939 | 0,537874                     |      |
| TC1300001928.mm.1 | 1,12 Dek            | JUC1300006174.mm.1 | 2,74  | 0,005441 | 0,379743                     |      |
| TC0900000643.mm.1 | 1,06 Npat           | JUC0900002404.mm.1 | 2,74  | 0,007756 | 0,402774                     |      |
| TC0600003433.mm.1 | -1,44 Itpr2         | JUC0600014219.mm.1 | 2,74  | 0,04559  | 0,554548                     |      |
| TC0600003433.mm.1 | -1,44 Itpr2         | JUC0600014191.mm.1 | 2,47  | 0,038843 | 0,537777                     |      |
| TC0600003433.mm.1 | -1,44 Itpr2         | JUC0600014236.mm.1 | 2,39  | 0,045122 | 0,553247                     |      |
| TC0600003433.mm.1 | -1,44 Itpr2         | JUC0600014225.mm.1 | 2,26  | 0,024135 | 0,493245                     |      |
| TC0700001348.mm.1 | -1,54 Alg8          | JUC0700005894.mm.1 | 2,74  | 0,031756 | 0,517489                     |      |
| TC0700001737.mm.1 | 1,08 Polr3e         | JUC0700007709.mm.1 | 2,74  | 0,037695 | 0,534488                     |      |
| TC1100002515.mm.1 | -1,11 Tenm2         | JUC1100012237.mm.1 | 2,74  | 0,032136 | 0,518586                     |      |
| TC0100002974.mm.1 | -1,15 Ddx18         | PSR0100023977.mm.1 | 2,73  | 0,004155 | 0,3623 Alternative 5' Donc   | 0,26 |
| TC1600001142.mm.1 | -1,72               | PSR1600009111.mm.1 | 2,73  | 0,02727  | 0,503711 Alternative 5' Donc | 0,25 |
| TC1600001142.mm.1 | -1,72               | PSR1600009109.mm.1 | 2,3   | 0,010794 | 0,424049 Alternative 3' Acce | 0,18 |
| TC0700003140.mm.1 | 4,28                | PSR0700028313.mm.1 | 2,73  | 0,032413 | 0,519325 Cassette Exon       | 0,21 |
| TC0700003140.mm.1 | 4,28                | PSR0700028314.mm.1 | -2,73 | 0,032413 | 0,519325 Cassette Exon       | 0,11 |
| TC0300001014.mm.1 | -1,82 Igsf3         | PSR0300008176.mm.1 | 2,73  | 0,001192 | 0,321265 Alternative 5' Donc | 0,19 |
| TC0300001014.mm.1 | -1,82 Igsf3         | PSR0300008173.mm.1 | 2,7   | 0,007802 | 0,403089 Cassette Exon       | 0,19 |
| TC0300001014.mm.1 | -1,82 Igsf3         | PSR0300008172.mm.1 | 2,42  | 0,004187 | 0,36279 Cassette Exon        | 0,18 |
| TC0300001014.mm.1 | -1,82 Igsf3         | JUC0300004240.mm.1 | 2,36  | 0,003632 | 0,3566                       |      |

|                   |                      |                    |        |          |                              |      |
|-------------------|----------------------|--------------------|--------|----------|------------------------------|------|
| TC0300001014.mm.1 | -1,82 Igsf3          | PSR0300008183.mm.1 | 2,26   | 0,001634 | 0,332913 Cassette Exon       | 0,16 |
| TC0300001014.mm.1 | -1,82 Igsf3          | PSR0300008187.mm.1 | 2,18   | 0,043629 | 0,550161 Alternative 3' Acce | 0,1  |
| TC0300001014.mm.1 | -1,82 Igsf3          | PSR0300008178.mm.1 | 2,04   | 0,002713 | 0,349612 Cassette Exon       | 0,12 |
| TC0100000766.mm.1 | -1,5 Sp100; n-R5s215 | JUC0100003663.mm.1 | 2,73   | 0,026031 | 0,49949                      |      |
| TC0100000766.mm.1 | -1,5 Sp100; n-R5s215 | PSR0100006365.mm.1 | 2,54   | 0,020175 | 0,477086 Cassette Exon       | 0,13 |
| TC0100000766.mm.1 | -1,5 Sp100; n-R5s215 | PSR0100006404.mm.1 | 2,01   | 0,039636 | 0,540125 Alternative 5' Donc | 0,11 |
| TC1000001745.mm.1 | 1,36 Grm1            | JUC1000006886.mm.1 | 2,73   | 0,005823 | 0,383169                     |      |
| TC1000001745.mm.1 | 1,36 Grm1            | PSR1000012695.mm.1 | -2,01  | 0,008135 | 0,405276 Cassette Exon       | 0,09 |
| TC1000001745.mm.1 | 1,36 Grm1            | JUC1000006894.mm.1 | -2,37  | 0,028997 | 0,508842                     |      |
| TC1200001953.mm.1 | 1,43 Sptb            | JUC1200007424.mm.1 | 2,73   | 0,029622 | 0,510558                     |      |
| TC1200001953.mm.1 | 1,43 Sptb            | JUC1200007430.mm.1 | -2,6   | 0,014976 | 0,452048                     |      |
| TC1800000063.mm.1 | -1,36 Colec12        | JUC1800000214.mm.1 | 2,73   | 0,015905 | 0,456586                     |      |
| TC0100000546.mm.1 | -1,21 Pth2r          | JUC0100002590.mm.1 | 2,73   | 0,023265 | 0,49004                      |      |
| TC1600001629.mm.1 | -1,51 4932412D23Rik  | JUC1600006890.mm.1 | 2,73   | 0,015016 | 0,452101                     |      |
| TC0800002856.mm.1 | 1,26 Smpd3           | JUC0800012059.mm.1 | 2,73   | 0,014714 | 0,45037                      |      |
| TC0800002856.mm.1 | 1,26 Smpd3           | PSR0800022050.mm.1 | 2,31   | 0,031552 | 0,517136                     |      |
| TC0800002856.mm.1 | 1,26 Smpd3           | PSR0800022052.mm.1 | -2,14  | 0,022511 | 0,487114                     |      |
| TC0800002856.mm.1 | 1,26 Smpd3           | JUC0800012061.mm.1 | -2,42  | 0,007474 | 0,400381                     |      |
| TC0800002856.mm.1 | 1,26 Smpd3           | JUC0800012063.mm.1 | -4,75  | 0,004034 | 0,361636                     |      |
| TC0500003466.mm.1 | -1,42 Cyp3a13        | JUC0500017198.mm.1 | 2,73   | 0,023293 | 0,49004                      |      |
| TC0700004193.mm.1 | -1,03 Zp2            | JUC0700018431.mm.1 | 2,73   | 0,025697 | 0,498173                     |      |
| TC0700004193.mm.1 | -1,03 Zp2            | JUC0700018435.mm.1 | 2,58   | 0,006837 | 0,393893                     |      |
| TC0700001651.mm.1 | -1,59 Tead1          | JUC0700007090.mm.1 | 2,73   | 0,011525 | 0,428401                     |      |
| TC0700001651.mm.1 | -1,59 Tead1          | JUC0700007077.mm.1 | 2,19   | 0,009846 | 0,417839                     |      |
| TC1100002985.mm.1 | -1,23 Gm12295        | JUC1100014098.mm.1 | 2,73   | 0,018386 | 0,468484                     |      |
| TC0100002640.mm.1 | 11,26 Scg2           | PSR0100021473.mm.1 | 2,72   | 0,005846 | 0,383654 Cassette Exon       | 0,14 |
| TC0100002640.mm.1 | 11,26 Scg2           | PSR0100021472.mm.1 | -3,57  | 0,003791 | 0,357817 Intron Retention    | 0,64 |
| TC0100002640.mm.1 | 11,26 Scg2           | PSR0100021475.mm.1 | -8,66  | 0,000779 | 0,309605 Alternative 5' Donc | 0,48 |
| TC0100002640.mm.1 | 11,26 Scg2           | PSR0100021470.mm.1 | -29,55 | 0,002279 | 0,345991 Alternative 3' Acce | 0,48 |
| TC0500000300.mm.1 | 2,77 Mapre3          | JUC0500001315.mm.1 | 2,72   | 0,001139 | 0,317344                     |      |
| TC0500000300.mm.1 | 2,77 Mapre3          | PSR0500002376.mm.1 | -2,15  | 0,047586 | 0,558743 Alternative 3' Acce | 0,12 |
| TC0500000300.mm.1 | 2,77 Mapre3          | PSR0500002381.mm.1 | -2,29  | 0,023533 | 0,490947 Cassette Exon       | 0,37 |
| TC0500000300.mm.1 | 2,77 Mapre3          | PSR0500002393.mm.1 | -2,75  | 0,011068 | 0,425887 Alternative 5' Donc | 0,25 |
| TC0500000300.mm.1 | 2,77 Mapre3          | JUC0500001322.mm.1 | -4,59  | 0,028085 | 0,506061                     |      |
| TC0200002042.mm.1 | 7,67 Chgb            | JUC0200008170.mm.1 | 2,72   | 0,016151 | 0,457969                     |      |
| TC0200002042.mm.1 | 7,67 Chgb            | JUC0200008168.mm.1 | -3,13  | 0,004532 | 0,368648                     |      |
| TC0200002042.mm.1 | 7,67 Chgb            | PSR0200016248.mm.1 | -10,01 | 0,001011 | 0,316361 Cassette Exon       | 0,28 |
| TC0200002042.mm.1 | 7,67 Chgb            | PSR0200016247.mm.1 | -12,27 | 0,003753 | 0,357586 Cassette Exon       | 0,28 |
| TC0100003092.mm.1 | 1,23 Snrpe           | PSR0100024850.mm.1 | 2,72   | 0,01645  | 0,459106 Alternative 3' Acce | 0,25 |
| TC1700002214.mm.1 | -1,55 Mdfi           | PSR1700020933.mm.1 | 2,72   | 0,013926 | 0,446193 Alternative 5' Donc | 0,22 |
| TC1700002214.mm.1 | -1,55 Mdfi           | PSR1700020922.mm.1 | 2,51   | 0,01658  | 0,459685 Alternative 5' Donc | 0,23 |
| TC1700002214.mm.1 | -1,55 Mdfi           | JUC1700011147.mm.1 | 2,32   | 0,032873 | 0,521141                     |      |
| TC0600003212.mm.1 | -1,62 Clec2j         | PSR0600025112.mm.1 | 2,72   | 0,035585 | 0,528808 Cassette Exon       | 0,16 |
| TC1600000760.mm.1 | 1,23 Dcbld2          | JUC1600003504.mm.1 | 2,72   | 0,019915 | 0,475879                     |      |
| TC1600000760.mm.1 | 1,23 Dcbld2          | PSR1600006600.mm.1 | -2,19  | 0,012318 | 0,434392 Cassette Exon       | 0,12 |
| TC0100002335.mm.1 | 1,3 Dnah7a           | JUC0100010644.mm.1 | 2,72   | 0,042424 | 0,547627                     |      |
| TC0100002335.mm.1 | 1,3 Dnah7a           | PSR0100018877.mm.1 | 2,59   | 0,008582 | 0,40821 Cassette Exon        | 0,07 |
| TC0100002335.mm.1 | 1,3 Dnah7a           | JUC0100010682.mm.1 | -2,44  | 0,014618 | 0,449914                     |      |

|                   |                          |                    |       |          |                              |      |
|-------------------|--------------------------|--------------------|-------|----------|------------------------------|------|
| TC1100003776.mm.1 | -1,09 Dnajc7             | JUC1100018178.mm.1 | 2,72  | 0,002476 | 0,349135                     |      |
| TC1700002253.mm.1 | -1 Tbc1d5; Gm25177       | JUC1700011327.mm.1 | 2,72  | 0,02658  | 0,501657                     |      |
| TC1700001794.mm.1 | 1,17 Mdga1               | JUC1700008914.mm.1 | 2,72  | 0,022647 | 0,487573                     |      |
| TC1700001794.mm.1 | 1,17 Mdga1               | JUC1700008927.mm.1 | -2,01 | 0,014423 | 0,448786                     |      |
| TC1700001794.mm.1 | 1,17 Mdga1               | JUC1700008912.mm.1 | -2,58 | 0,029597 | 0,510558                     |      |
| TC0500002277.mm.1 | -1,13                    | JUC0500011429.mm.1 | 2,72  | 0,039813 | 0,540831                     |      |
| TC0800000581.mm.1 | -1,73 1190028D05Rik      | JUC0800002171.mm.1 | 2,72  | 0,029524 | 0,510193                     |      |
| TC0500000385.mm.1 | 1,09 Htt                 | JUC0500002064.mm.1 | 2,72  | 0,005246 | 0,377696                     |      |
| TC0500003219.mm.1 | 1,27 Camkk2              | PSR0500028769.mm.1 | 2,72  | 0,014648 | 0,450098                     |      |
| TC0500003219.mm.1 | 1,27 Camkk2              | JUC0500015679.mm.1 | -2,32 | 0,035778 | 0,529143                     |      |
| TC0700001951.mm.1 | -1,07 Dock1              | JUC0700009053.mm.1 | 2,72  | 0,009946 | 0,41841                      |      |
| TC0400000064.mm.1 | 1 Clvs1                  | JUC0400000206.mm.1 | 2,72  | 0,013806 | 0,445064                     |      |
| TC1000002650.mm.1 | -1,08 Utp20              | JUC1000011053.mm.1 | 2,72  | 0,004466 | 0,367639                     |      |
| TC0X00000999.mm.1 | -1,46 Dmrtc1b            | JUC0X00003335.mm.1 | 2,72  | 0,016899 | 0,460797                     |      |
| TC0900002906.mm.1 | -1,44                    | JUC0900013358.mm.1 | 2,72  | 0,005901 | 0,383835                     |      |
| TC0600000885.mm.1 | 3,07 Lrrtm4              | PSR0600006705.mm.1 | 2,71  | 0,034599 | 0,52602 Cassette Exon        | 0,02 |
| TC0600000885.mm.1 | 3,07 Lrrtm4              | PSR0600006709.mm.1 | -3,03 | 0,04227  | 0,547092 Cassette Exon       | 0,38 |
| TC0600000885.mm.1 | 3,07 Lrrtm4              | PSR0600006715.mm.1 | -3,05 | 0,001899 | 0,338712 Alternative 5' Donc | 0,31 |
| TC0600000885.mm.1 | 3,07 Lrrtm4              | PSR0600006701.mm.1 | -3,89 | 0,014457 | 0,44909 Alternative 3' Acce  | 0,47 |
| TC0600000885.mm.1 | 3,07 Lrrtm4              | JUC0600003382.mm.1 | -3,99 | 0,00659  | 0,39213                      |      |
| TC0600000885.mm.1 | 3,07 Lrrtm4              | PSR0600006707.mm.1 | -4,6  | 0,001043 | 0,316361 Cassette Exon       | 0,38 |
| TC0600000885.mm.1 | 3,07 Lrrtm4              | PSR0600006703.mm.1 | -5,16 | 0,00037  | 0,291725 Alternative 3' Acce | 0,48 |
| TC0600000885.mm.1 | 3,07 Lrrtm4              | PSR0600006716.mm.1 | -5,47 | 0,000867 | 0,311909 Cassette Exon       | 0,41 |
| TC0600000885.mm.1 | 3,07 Lrrtm4              | PSR0600006706.mm.1 | -5,49 | 0,012782 | 0,437236 Cassette Exon       | 0,38 |
| TC0600000885.mm.1 | 3,07 Lrrtm4              | PSR0600006702.mm.1 | -5,76 | 0,003614 | 0,356223 Alternative 3' Acce | 0,48 |
| TC0600000885.mm.1 | 3,07 Lrrtm4              | PSR0600006717.mm.1 | -5,88 | 0,017762 | 0,465425 Cassette Exon       | 0,28 |
| TC0600000885.mm.1 | 3,07 Lrrtm4              | JUC0600003385.mm.1 | -5,94 | 0,002279 | 0,345991                     |      |
| TC0600000885.mm.1 | 3,07 Lrrtm4              | JUC0600003381.mm.1 | -5,99 | 0,003953 | 0,359922                     |      |
| TC1500000183.mm.1 | 2,24 Ctnnd2              | JUC1500000883.mm.1 | 2,71  | 0,033269 | 0,522286                     |      |
| TC1500000183.mm.1 | 2,24 Ctnnd2              | PSR1500001459.mm.1 | -2,06 | 0,049922 | 0,563902 Cassette Exon       | 0,13 |
| TC1500000183.mm.1 | 2,24 Ctnnd2              | JUC1500000894.mm.1 | -2,09 | 0,006387 | 0,389608                     |      |
| TC1500000183.mm.1 | 2,24 Ctnnd2              | PSR1500001466.mm.1 | -2,43 | 0,039095 | 0,538395 Cassette Exon       | 0,21 |
| TC1500000183.mm.1 | 2,24 Ctnnd2              | JUC1500000886.mm.1 | -4,62 | 0,010096 | 0,418998                     |      |
| TC0700002773.mm.1 | -1 Haus5; Rbm42; Gm21982 | PSR0700024760.mm.1 | 2,71  | 0,036914 | 0,5323 Cassette Exon         | 0,2  |
| TC0700002773.mm.1 | -1 Haus5; Rbm42; Gm21982 | JUC0700013232.mm.1 | 2,21  | 0,039364 | 0,539381                     |      |
| TC0700002773.mm.1 | -1 Haus5; Rbm42; Gm21982 | PSR0700024735.mm.1 | 2,01  | 0,03735  | 0,533573 Cassette Exon       | 0,1  |
| TC1300002532.mm.1 | -1,31 Naip6; Naip7       | PSR1300017120.mm.1 | 2,71  | 0,020782 | 0,479424 Cassette Exon       | 0,19 |
| TC0700000612.mm.1 | -1,9 Scgb1b20            | PSR0700005318.mm.1 | 2,71  | 0,009661 | 0,417484 Cassette Exon       | 0,18 |
| TC0600001629.mm.1 | -1,1 BC049715            | PSR0600012958.mm.1 | 2,71  | 0,002829 | 0,352207 Cassette Exon       | 0,16 |
| TC1400001445.mm.1 | -1,42 Fhit               | JUC1400005862.mm.1 | 2,71  | 0,012876 | 0,438024                     |      |
| TC1400001445.mm.1 | -1,42 Fhit               | JUC1400005861.mm.1 | 2,27  | 0,010308 | 0,420505                     |      |
| TC1400001445.mm.1 | -1,42 Fhit               | JUC1400005850.mm.1 | 2,02  | 0,023204 | 0,490032                     |      |
| TC1400002833.mm.1 | -1,01 Rnf31              | JUC1400003359.mm.1 | 2,71  | 0,000875 | 0,311909                     |      |
| TC1400002833.mm.1 | -1,01 Rnf31              | JUC1400003371.mm.1 | -2,02 | 0,009885 | 0,418122                     |      |
| TC1400002833.mm.1 | -1,01 Rnf31              | JUC1400003364.mm.1 | -2,96 | 0,000566 | 0,304044                     |      |
| TC0200002410.mm.1 | -1,05 Src                | JUC0200009887.mm.1 | 2,71  | 0,000705 | 0,306015                     |      |
| TC0500000368.mm.1 | -1,14 4930557J02Rik      | JUC0500001943.mm.1 | 2,71  | 0,03593  | 0,529399                     |      |
| TC1000002611.mm.1 | 1,26 Prdm4               | JUC1000010745.mm.1 | 2,71  | 0,016067 | 0,457431                     |      |

|                   |                     |                    |        |          |          |                     |      |
|-------------------|---------------------|--------------------|--------|----------|----------|---------------------|------|
| TC1000002611.mm.1 | 1,26 Prdm4          | JUC1000010738.mm.1 | -2,05  | 0,034483 | 0,525929 |                     |      |
| TC0200001866.mm.1 | -1,52 Sema6d        | PSR0200014535.mm.1 | 2,7    | 0,03219  | 0,518843 | Alternative 3' Acce | 0,24 |
| TC0200001866.mm.1 | -1,52 Sema6d        | JUC0200007278.mm.1 | 2,16   | 0,015776 | 0,455583 |                     |      |
| TC0200001866.mm.1 | -1,52 Sema6d        | JUC0200007290.mm.1 | 2,1    | 0,027404 | 0,503961 |                     |      |
| TC0700000932.mm.1 | -1,1 Tubgcp5        | PSR0700008422.mm.1 | 2,7    | 0,007665 | 0,402377 | Cassette Exon       | 0,14 |
| TC0400002023.mm.1 | 1,69 Chd5           | PSR0400016641.mm.1 | 2,7    | 0,013487 | 0,443178 | Cassette Exon       | 0,1  |
| TC0400002023.mm.1 | 1,69 Chd5           | PSR0400016623.mm.1 | 2,61   | 0,009094 | 0,412827 | Cassette Exon       | 0,13 |
| TC0400002023.mm.1 | 1,69 Chd5           | JUC0400008714.mm.1 | 2,34   | 0,023052 | 0,489379 |                     |      |
| TC0400002023.mm.1 | 1,69 Chd5           | JUC0400008728.mm.1 | -2,31  | 0,006821 | 0,39387  |                     |      |
| TC0400002023.mm.1 | 1,69 Chd5           | JUC0400008734.mm.1 | -4,05  | 0,041197 | 0,544126 |                     |      |
| TC0300000485.mm.1 | 1,18 Mbnl1          | JUC0300001774.mm.1 | 2,7    | 0,015992 | 0,456985 |                     |      |
| TC0200000235.mm.1 | -1,43               | JUC0200000385.mm.1 | 2,7    | 0,000268 | 0,28803  |                     |      |
| TC0600000672.mm.1 | 1,81 Ppp1r17        | JUC0600002636.mm.1 | 2,7    | 0,044382 | 0,551441 |                     |      |
| TC0600000672.mm.1 | 1,81 Ppp1r17        | JUC0600002637.mm.1 | -2,66  | 0,021151 | 0,480825 |                     |      |
| TC0X00001922.mm.1 | 2,96 Slc9a7         | JUC0X00006173.mm.1 | 2,69   | 0,024673 | 0,494711 |                     |      |
| TC0X00001922.mm.1 | 2,96 Slc9a7         | PSR0X00012223.mm.1 | -2,81  | 0,034651 | 0,526169 | Cassette Exon       | 0,14 |
| TC0X00001922.mm.1 | 2,96 Slc9a7         | PSR0X00012210.mm.1 | -3,8   | 0,003658 | 0,357266 | Cassette Exon       | 0,06 |
| TC0X00001922.mm.1 | 2,96 Slc9a7         | PSR0X00012208.mm.1 | -3,94  | 0,012021 | 0,432286 | Cassette Exon       | 0,29 |
| TC0X00001922.mm.1 | 2,96 Slc9a7         | PSR0X00012205.mm.1 | -4,12  | 0,003235 | 0,354243 | Alternative 3' Acce | 0,36 |
| TC0X00001922.mm.1 | 2,96 Slc9a7         | JUC0X00006170.mm.1 | -4,47  | 0,010567 | 0,422432 |                     |      |
| TC0X00001922.mm.1 | 2,96 Slc9a7         | JUC0X00006182.mm.1 | -8,25  | 0,015727 | 0,455416 |                     |      |
| TC0400001431.mm.1 | -1,08 Epha10        | PSR0400010793.mm.1 | 2,69   | 0,014531 | 0,449545 | Alternative 5' Donc | 0,23 |
| TC0700003719.mm.1 | -1,08 l7Rn6         | JUC0700016580.mm.1 | 2,69   | 0,000826 | 0,311886 |                     |      |
| TC0700003719.mm.1 | -1,08 l7Rn6         | PSR0700031362.mm.1 | 2,19   | 0,002243 | 0,34578  | Cassette Exon       | 0,09 |
| TC1900000297.mm.1 | -1,86 C130060C02Rik | PSR1900003086.mm.1 | 2,69   | 0,047145 | 0,557948 | Alternative 3' Acce | 0,07 |
| TC1200001241.mm.1 | 1,33 Mark3          | JUC1200004824.mm.1 | 2,69   | 0,039707 | 0,540443 |                     |      |
| TC0200004487.mm.1 | -1,03 Catsper2      | JUC0200019603.mm.1 | 2,69   | 0,012597 | 0,435933 |                     |      |
| TC1700001447.mm.1 | 1,2 Map3k4          | JUC1700007009.mm.1 | 2,69   | 0,033348 | 0,522553 |                     |      |
| TC1800001637.mm.1 | -1,73 Slc14a1       | JUC1800006556.mm.1 | 2,69   | 0,003143 | 0,353892 |                     |      |
| TC1400002872.mm.1 | 1,15                | JUC1400011435.mm.1 | 2,69   | 0,005465 | 0,379939 |                     |      |
| TC0200000033.mm.1 | 1,32 Bend7          | JUC0200000118.mm.1 | 2,69   | 0,031109 | 0,515319 |                     |      |
| TC0800001400.mm.1 | -1,06 Cmip          | JUC0800006209.mm.1 | 2,69   | 0,001178 | 0,319796 |                     |      |
| TC0600001980.mm.1 | 9,61 Opn1sw         | JUC0600008123.mm.1 | 2,68   | 0,018403 | 0,468484 |                     |      |
| TC0600001980.mm.1 | 9,61 Opn1sw         | PSR0600015535.mm.1 | -2,52  | 0,024441 | 0,49395  | Cassette Exon       | 0,18 |
| TC0600001980.mm.1 | 9,61 Opn1sw         | PSR0600015536.mm.1 | -2,57  | 0,015963 | 0,456885 | Cassette Exon       | 0,18 |
| TC0600001980.mm.1 | 9,61 Opn1sw         | JUC0600008124.mm.1 | -4,96  | 0,015848 | 0,456345 |                     |      |
| TC0600001980.mm.1 | 9,61 Opn1sw         | JUC0600008125.mm.1 | -7,94  | 0,010606 | 0,422777 |                     |      |
| TC0600001980.mm.1 | 9,61 Opn1sw         | PSR0600015546.mm.1 | -8,84  | 0,022228 | 0,485896 | Alternative 5' Donc | 0,48 |
| TC0600001980.mm.1 | 9,61 Opn1sw         | PSR0600015548.mm.1 | -9,34  | 0,014886 | 0,451777 | Alternative 5' Donc | 0,48 |
| TC0600001980.mm.1 | 9,61 Opn1sw         | PSR0600015549.mm.1 | -9,45  | 0,020887 | 0,479589 | Cassette Exon       | 0,41 |
| TC0600001980.mm.1 | 9,61 Opn1sw         | JUC0600008126.mm.1 | -12,99 | 0,014202 | 0,447698 |                     |      |
| TC0400002514.mm.1 | -1,01 Fancg         | PSR0400020329.mm.1 | 2,68   | 0,013838 | 0,445311 | Intron Retention    | 0,32 |
| TC0400002514.mm.1 | -1,01 Fancg         | JUC0400010571.mm.1 | -2,84  | 0,012508 | 0,435429 |                     |      |
| TC1600001343.mm.1 | 1,36 Abcc5          | PSR1600011136.mm.1 | 2,68   | 0,010137 | 0,419217 | Alternative 5' Donc | 0,26 |
| TC1600001343.mm.1 | 1,36 Abcc5          | JUC1600005796.mm.1 | 2,09   | 0,039123 | 0,538475 |                     |      |
| TC0200003529.mm.1 | -2,25 Neb           | JUC0200015129.mm.1 | 2,68   | 0,014941 | 0,451968 |                     |      |
| TC0200003529.mm.1 | -2,25 Neb           | PSR0200030029.mm.1 | 2,51   | 0,01202  | 0,432286 | Alternative 3' Acce | 0,25 |
| TC0200003529.mm.1 | -2,25 Neb           | PSR0200030039.mm.1 | 2,3    | 0,002365 | 0,34829  | Alternative 3' Acce | 0,21 |

|                   |                             |                    |        |          |                              |      |
|-------------------|-----------------------------|--------------------|--------|----------|------------------------------|------|
| TC0200003529.mm.1 | -2,25 Neb                   | PSR0200030178.mm.1 | 2,27   | 0,033323 | 0,522414 Cassette Exon       | 0,14 |
| TC0200003529.mm.1 | -2,25 Neb                   | JUC0200015195.mm.1 | 2,26   | 0,044618 | 0,552129                     |      |
| TC0200005022.mm.1 | -1,2 Gm14286                | PSR0200043002.mm.1 | 2,68   | 0,010147 | 0,419448 Alternative 5' Donc | 0,25 |
| TC0200005022.mm.1 | -1,2 Gm14286                | JUC0200022183.mm.1 | 2,67   | 0,003013 | 0,353447                     |      |
| TC0800000661.mm.1 | 2,58 Spock3                 | PSR0800004508.mm.1 | 2,68   | 0,041739 | 0,545426 Cassette Exon       | 0,16 |
| TC0800000661.mm.1 | 2,58 Spock3                 | PSR0800004516.mm.1 | 2,28   | 0,025793 | 0,498519 Cassette Exon       | 0,11 |
| TC0800000661.mm.1 | 2,58 Spock3                 | JUC0800002416.mm.1 | -2,38  | 0,003411 | 0,355242                     |      |
| TC0800000661.mm.1 | 2,58 Spock3                 | PSR0800004498.mm.1 | -2,5   | 0,009624 | 0,417315 Cassette Exon       | 0,12 |
| TC0800000661.mm.1 | 2,58 Spock3                 | PSR0800004495.mm.1 | -2,96  | 0,030334 | 0,512885 Cassette Exon       | 0,19 |
| TC0800000661.mm.1 | 2,58 Spock3                 | PSR0800004496.mm.1 | -3,04  | 0,014284 | 0,448073 Cassette Exon       | 0,25 |
| TC0800000661.mm.1 | 2,58 Spock3                 | PSR0800004511.mm.1 | -3,2   | 0,015487 | 0,454456 Cassette Exon       | 0,22 |
| TC0800000661.mm.1 | 2,58 Spock3                 | PSR0800004505.mm.1 | -3,21  | 0,001096 | 0,317328 Cassette Exon       | 0,13 |
| TC0800000661.mm.1 | 2,58 Spock3                 | PSR0800004499.mm.1 | -4,39  | 0,031918 | 0,518021 Alternative 3' Acce | 0,16 |
| TC0800000661.mm.1 | 2,58 Spock3                 | JUC0800002417.mm.1 | -4,95  | 0,020734 | 0,479166                     |      |
| TC0400000772.mm.1 | -2,02 Gm11240               | PSR0400005449.mm.1 | 2,68   | 0,013152 | 0,440265 Cassette Exon       | 0,16 |
| TC0400000772.mm.1 | -2,02 Gm11240               | PSR0400005452.mm.1 | 2,43   | 0,02998  | 0,51153 Alternative 5' Donc  | 0,2  |
| TC0400000772.mm.1 | -2,02 Gm11240               | PSR0400005437.mm.1 | 2,17   | 0,002211 | 0,345614 Alternative 3' Acce | 0,14 |
| TC0200002788.mm.1 | -1 Gata5os; Gm14318         | JUC0200011560.mm.1 | 2,68   | 0,004043 | 0,36172                      |      |
| TC1500000565.mm.1 | -1,1 Gsdmd                  | JUC1500002285.mm.1 | 2,68   | 0,010872 | 0,424174                     |      |
| TC1700000813.mm.1 | -1,35 Esp6; Esp5; Esp6-esp5 | JUC1700004237.mm.1 | 2,68   | 0,019638 | 0,474876                     |      |
| TC1600000454.mm.1 | 1,17 Lrch3                  | JUC1600002235.mm.1 | 2,68   | 0,029307 | 0,509874                     |      |
| TC0500002002.mm.1 | 1,42 4921504A21Rik          | JUC0500009891.mm.1 | 2,68   | 0,005198 | 0,377015                     |      |
| TC0700003757.mm.1 | -1,03 Gm15413               | JUC0700016691.mm.1 | 2,68   | 0,029014 | 0,508842                     |      |
| TC1800000627.mm.1 | 10,34 Pde6a                 | JUC1800002544.mm.1 | 2,67   | 0,000475 | 0,298999                     |      |
| TC1800000627.mm.1 | 10,34 Pde6a                 | PSR1800004574.mm.1 | -2,18  | 0,008654 | 0,408463 Alternative 5' Donc | 0,13 |
| TC1800000627.mm.1 | 10,34 Pde6a                 | PSR1800004544.mm.1 | -12,08 | 0,001566 | 0,331411 Alternative 3' Acce | 0,48 |
| TC1800000627.mm.1 | 10,34 Pde6a                 | PSR1800004563.mm.1 | -12,1  | 0,000668 | 0,304088 Cassette Exon       | 0,36 |
| TC1800000627.mm.1 | 10,34 Pde6a                 | JUC1800002563.mm.1 | -13,67 | 0,009962 | 0,418429                     |      |
| TC1600001849.mm.1 | 3,49 Cadm2                  | PSR1600014725.mm.1 | 2,67   | 0,019406 | 0,473802                     |      |
| TC1600001849.mm.1 | 3,49 Cadm2                  | PSR1600014728.mm.1 | 2,28   | 0,000028 | 0,229631 Cassette Exon       | 0,12 |
| TC1600001849.mm.1 | 3,49 Cadm2                  | JUC1600007634.mm.1 | 2,02   | 0,044615 | 0,552129                     |      |
| TC1600001849.mm.1 | 3,49 Cadm2                  | PSR1600014735.mm.1 | -2,05  | 0,009643 | 0,417354 Cassette Exon       | 0,13 |
| TC1600001849.mm.1 | 3,49 Cadm2                  | PSR1600014747.mm.1 | -2,58  | 0,030834 | 0,514305 Cassette Exon       | 0,19 |
| TC1600001849.mm.1 | 3,49 Cadm2                  | PSR1600014749.mm.1 | -2,79  | 0,012819 | 0,437476 Cassette Exon       | 0,19 |
| TC1600001849.mm.1 | 3,49 Cadm2                  | PSR1600014727.mm.1 | -3,17  | 0,001846 | 0,337414                     |      |
| TC1600001849.mm.1 | 3,49 Cadm2                  | PSR1600014746.mm.1 | -3,59  | 0,005369 | 0,378662 Alternative 5' Donc | 0,46 |
| TC1600001849.mm.1 | 3,49 Cadm2                  | PSR1600014750.mm.1 | -3,74  | 0,005196 | 0,377015 Cassette Exon       | 0,19 |
| TC1600001849.mm.1 | 3,49 Cadm2                  | PSR1600014744.mm.1 | -5,43  | 0,019978 | 0,476227 Cassette Exon       | 0,27 |
| TC1700000496.mm.1 | -2,1 Cdkn1a                 | PSR1700004363.mm.1 | 2,67   | 0,039857 | 0,54093 Alternative 3' Acce  | 0,27 |
| TC1200002522.mm.1 | -1,37 Churc1                | PSR1200004888.mm.1 | 2,67   | 0,029696 | 0,510949 Alternative 5' Donc | 0,26 |
| TC1200002522.mm.1 | -1,37 Churc1                | PSR1200004890.mm.1 | 2,09   | 0,037394 | 0,533743 Alternative 5' Donc | 0,26 |
| TC0900002375.mm.1 | 5,5 Cplx3                   | JUC0900011213.mm.1 | 2,67   | 0,013575 | 0,443703                     |      |
| TC0900002375.mm.1 | 5,5 Cplx3                   | PSR0900019890.mm.1 | -2,47  | 0,013119 | 0,439856 Alternative 3' Acce | 0,24 |
| TC1700002520.mm.1 | 1,58 Galnt14                | PSR1700023089.mm.1 | 2,67   | 0,009845 | 0,417839 Alternative 3' Acce | 0,23 |
| TC1700002520.mm.1 | 1,58 Galnt14                | JUC1700023105.mm.1 | -2,07  | 0,011392 | 0,427549 Alternative 3' Acce | 0,2  |
| TC0600000337.mm.1 | 1,03 Agbl3                  | JUC0600001270.mm.1 | 2,67   | 0,00317  | 0,354089                     |      |
| TC0600000337.mm.1 | 1,03 Agbl3                  | PSR0600002523.mm.1 | -2,5   | 0,031893 | 0,51802 Alternative 3' Acce  | 0,22 |
| TC1400002216.mm.1 | -1,27 Neil2                 | JUC1400009380.mm.1 | 2,67   | 0,001598 | 0,332515                     |      |

|                   |                     |                    |       |          |                              |      |
|-------------------|---------------------|--------------------|-------|----------|------------------------------|------|
| TC0200002602.mm.1 | -1,28 Ptpn1         | JUC0200010896.mm.1 | 2,67  | 0,027666 | 0,504707                     |      |
| TC1100003934.mm.1 | 1,83 Polg2          | JUC1100019279.mm.1 | 2,67  | 0,00677  | 0,393372                     |      |
| TC0200004199.mm.1 | 2,73 Gm13810        | JUC0200018014.mm.1 | 2,67  | 0,004724 | 0,370888                     |      |
| TC1200002152.mm.1 | 1,25 Gtf2a1         | JUC1200008242.mm.1 | 2,67  | 0,031158 | 0,515677                     |      |
| TC1400002738.mm.1 | -1,56 Slc15a1       | JUC1400011226.mm.1 | 2,67  | 0,00342  | 0,355274                     |      |
| TC0900000369.mm.1 | -1,21 Vsig2         | JUC0900001471.mm.1 | 2,67  | 0,030388 | 0,512923                     |      |
| TC0500001222.mm.1 | 1,03 Myo1h; Gm13789 | JUC0500005729.mm.1 | 2,67  | 0,00641  | 0,389851                     |      |
| TC0500001222.mm.1 | 1,03 Myo1h; Gm13789 | JUC0500005705.mm.1 | -3,14 | 0,04447  | 0,551693                     |      |
| TC0700001875.mm.1 | -1,35 Itgam         | JUC0700008508.mm.1 | 2,67  | 0,00138  | 0,32572                      |      |
| TC0700001875.mm.1 | -1,35 Itgam         | JUC0700008504.mm.1 | 2,1   | 0,029703 | 0,51095                      |      |
| TC0300001444.mm.1 | -1,06 Gbp2b; Gbp5   | JUC0300006088.mm.1 | 2,67  | 0,028073 | 0,506002                     |      |
| TC0300001497.mm.1 | 1,61 Ttl7           | JUC0300006424.mm.1 | 2,67  | 0,013518 | 0,443431                     |      |
| TC0300001497.mm.1 | 1,61 Ttl7           | JUC0300006417.mm.1 | -2,32 | 0,012589 | 0,435933                     |      |
| TC1100003339.mm.1 | 1,54 Crif3          | JUC1100016049.mm.1 | 2,67  | 0,012959 | 0,438967                     |      |
| TC1100003339.mm.1 | 1,54 Crif3          | JUC1100016056.mm.1 | -2,47 | 0,016724 | 0,460261                     |      |
| TC0X00001275.mm.1 | 1,01 Tmem35         | JUC0X00003883.mm.1 | 2,67  | 0,009679 | 0,417605                     |      |
| TC0900002320.mm.1 | 2,09 Dmxl2          | JUC0900010960.mm.1 | 2,66  | 0,02063  | 0,478805                     |      |
| TC0900002320.mm.1 | 2,09 Dmxl2          | JUC0900010982.mm.1 | -2,08 | 0,046883 | 0,557414                     |      |
| TC0900002320.mm.1 | 2,09 Dmxl2          | PSR0900019456.mm.1 | -2,27 | 0,035247 | 0,52837 Alternative 5' Donc  | 0,1  |
| TC0900002320.mm.1 | 2,09 Dmxl2          | PSR0900019450.mm.1 | -2,5  | 0,021605 | 0,483422 Cassette Exon       | 0,15 |
| TC0900002320.mm.1 | 2,09 Dmxl2          | PSR0900019407.mm.1 | -2,84 | 0,007811 | 0,403089 Cassette Exon       | 0,44 |
| TC0900002320.mm.1 | 2,09 Dmxl2          | JUC0900010945.mm.1 | -3,99 | 0,001631 | 0,332897                     |      |
| TC0900002320.mm.1 | 2,09 Dmxl2          | JUC0900010946.mm.1 | -4,14 | 0,007244 | 0,39826                      |      |
| TC0900002320.mm.1 | 2,09 Dmxl2          | PSR0900019445.mm.1 | -4,85 | 0,005582 | 0,381035 Alternative 3' Acce | 0,49 |
| TC0400001557.mm.1 | -2,22 Laptm5        | PSR0400012261.mm.1 | 2,66  | 0,046297 | 0,556186 Alternative 5' Donc | 0,06 |
| TC0400001557.mm.1 | -2,22 Laptm5        | PSR0400012246.mm.1 | 2,36  | 0,031962 | 0,518173 Alternative 5' Donc | 0,21 |
| TC0400001557.mm.1 | -2,22 Laptm5        | PSR0400012260.mm.1 | 2,3   | 0,047181 | 0,558037                     |      |
| TC0700004081.mm.1 | 1,67 Nrip3          | PSR0700033719.mm.1 | 2,66  | 0,000063 | 0,250119 Cassette Exon       | 0,18 |
| TC0700004081.mm.1 | 1,67 Nrip3          | JUC0700017711.mm.1 | -3,02 | 0,00293  | 0,352289                     |      |
| TC0500000815.mm.1 | -1,72 Mob1b         | PSR0500007189.mm.1 | 2,66  | 0,037189 | 0,533252 Cassette Exon       | 0,17 |
| TC1800001507.mm.1 | 1,92 Spire1         | JUC1800006175.mm.1 | 2,66  | 0,006163 | 0,387873                     |      |
| TC1800001507.mm.1 | 1,92 Spire1         | PSR1800011060.mm.1 | -2,1  | 0,003943 | 0,359922 Cassette Exon       | 0,11 |
| TC1800001507.mm.1 | 1,92 Spire1         | PSR1800011077.mm.1 | -2,25 | 0,002495 | 0,349135 Cassette Exon       | 0,12 |
| TC1800001507.mm.1 | 1,92 Spire1         | PSR1800011061.mm.1 | -2,33 | 0,003341 | 0,354243 Cassette Exon       | 0,12 |
| TC0800001317.mm.1 | 1,04 Hydin          | JUC0800005830.mm.1 | 2,66  | 0,012942 | 0,438596                     |      |
| TC0800001317.mm.1 | 1,04 Hydin          | PSR0800010701.mm.1 | -2,14 | 0,04802  | 0,559603 Cassette Exon       | 0,1  |
| TC0800001317.mm.1 | 1,04 Hydin          | JUC0800005862.mm.1 | -2,16 | 0,024513 | 0,493992                     |      |
| TC1400000309.mm.1 | 1,02 Rft1           | JUC1400001485.mm.1 | 2,66  | 0,036545 | 0,531355                     |      |
| TC1200000523.mm.1 | 1,15 Fam179b        | JUC1200002012.mm.1 | 2,66  | 0,034055 | 0,524583                     |      |
| TC1200000013.mm.1 | -1,35 Dtnb          | JUC1200000087.mm.1 | 2,66  | 0,000184 | 0,284485                     |      |
| TC0100002367.mm.1 | 1,55 BC055402       | JUC0100010909.mm.1 | 2,66  | 0,047891 | 0,559408                     |      |
| TC1500001069.mm.1 | 1,14 6030408B16Rik  | JUC1500004826.mm.1 | 2,66  | 0,027325 | 0,503766                     |      |
| TC0900001468.mm.1 | -1,13 Myl3          | JUC0900006857.mm.1 | 2,66  | 0,002071 | 0,342181                     |      |
| TC0600001252.mm.1 | -1,48 Il17rc        | JUC0600005045.mm.1 | 2,66  | 0,035865 | 0,529376                     |      |
| TC0500003297.mm.1 | 1,06 Stx2           | JUC0500016268.mm.1 | 2,66  | 0,04292  | 0,548271                     |      |
| TC1100000125.mm.1 | 1,11 Vwc2           | JUC1100000707.mm.1 | 2,66  | 0,010353 | 0,421002                     |      |
| TC0X00002867.mm.1 | 1,29 Hdx            | JUC0X00009244.mm.1 | 2,66  | 0,033221 | 0,522175                     |      |
| TC0100003878.mm.1 | 6,84 Mpp4           | JUC0100011088.mm.1 | 2,65  | 0,001368 | 0,32572                      |      |

|                   |             |                    |        |          |                              |      |
|-------------------|-------------|--------------------|--------|----------|------------------------------|------|
| TC0100003878.mm.1 | 6,84 Mpp4   | JUC0100011098.mm.1 | 2,63   | 0,000196 | 0,28803                      |      |
| TC0100003878.mm.1 | 6,84 Mpp4   | JUC0100011100.mm.1 | 2,57   | 0,047516 | 0,558686                     |      |
| TC0100003878.mm.1 | 6,84 Mpp4   | JUC0100011086.mm.1 | 2,5    | 0,009495 | 0,416578                     |      |
| TC0100003878.mm.1 | 6,84 Mpp4   | JUC0100011093.mm.1 | 2,4    | 0,014501 | 0,449528                     |      |
| TC0100003878.mm.1 | 6,84 Mpp4   | JUC0100011106.mm.1 | 2,22   | 0,033908 | 0,52424                      |      |
| TC0100003878.mm.1 | 6,84 Mpp4   | PSR0100019580.mm.1 | -2,16  | 0,018605 | 0,469657 Cassette Exon       | 0,28 |
| TC0100003878.mm.1 | 6,84 Mpp4   | PSR0100019561.mm.1 | -2,42  | 0,026756 | 0,502096 Alternative 5' Donc | 0,3  |
| TC0100003878.mm.1 | 6,84 Mpp4   | JUC0100011105.mm.1 | -2,63  | 0,009157 | 0,413447                     |      |
| TC0100003878.mm.1 | 6,84 Mpp4   | PSR0100019587.mm.1 | -3,26  | 0,001727 | 0,335996 Cassette Exon       | 0,48 |
| TC0100003878.mm.1 | 6,84 Mpp4   | PSR0100019557.mm.1 | -4,19  | 0,000036 | 0,238339 Alternative 3' Acce | 0,39 |
| TC0100003878.mm.1 | 6,84 Mpp4   | JUC0100011107.mm.1 | -4,44  | 0,000359 | 0,290838                     |      |
| TC0100003878.mm.1 | 6,84 Mpp4   | JUC0100011103.mm.1 | -4,66  | 0,000053 | 0,24627                      |      |
| TC0100003878.mm.1 | 6,84 Mpp4   | PSR0100019584.mm.1 | -4,82  | 0,010998 | 0,425491 Alternative 5' Donc | 0,41 |
| TC0100003878.mm.1 | 6,84 Mpp4   | PSR0100019570.mm.1 | -5     | 0,001122 | 0,317328 Alternative 3' Acce | 0,48 |
| TC0100003878.mm.1 | 6,84 Mpp4   | JUC0100011097.mm.1 | -5,78  | 0,003089 | 0,353892                     |      |
| TC0100003878.mm.1 | 6,84 Mpp4   | JUC0100011108.mm.1 | -6,07  | 0,001519 | 0,330268                     |      |
| TC0100003878.mm.1 | 6,84 Mpp4   | PSR0100019590.mm.1 | -7,03  | 0,005036 | 0,374502 Cassette Exon       | 0,41 |
| TC0100003878.mm.1 | 6,84 Mpp4   | JUC0100011111.mm.1 | -7,37  | 0,001707 | 0,335996                     |      |
| TC0100003878.mm.1 | 6,84 Mpp4   | JUC0100011099.mm.1 | -18,62 | 0,003551 | 0,356223                     |      |
| TC0100003878.mm.1 | 6,84 Mpp4   | JUC0100011115.mm.1 | -21,16 | 0,001583 | 0,331726                     |      |
| TC0100003878.mm.1 | 6,84 Mpp4   | JUC0100011113.mm.1 | -21,71 | 0,001271 | 0,322251                     |      |
| TC0500002719.mm.1 | 2,9 Adamts3 | JUC0500013060.mm.1 | 2,65   | 0,000812 | 0,311886                     |      |
| TC0500002719.mm.1 | 2,9 Adamts3 | PSR0500023990.mm.1 | 2,57   | 0,002856 | 0,352207 Alternative 5' Donc | 0,23 |
| TC0500002719.mm.1 | 2,9 Adamts3 | JUC0500013054.mm.1 | -2,09  | 0,025282 | 0,497095                     |      |
| TC0500002719.mm.1 | 2,9 Adamts3 | PSR0500023969.mm.1 | -2,52  | 0,007696 | 0,402552 Cassette Exon       | 0,29 |
| TC0500002719.mm.1 | 2,9 Adamts3 | PSR0500023968.mm.1 | -2,62  | 0,004847 | 0,37168 Cassette Exon        | 0,18 |
| TC0500002719.mm.1 | 2,9 Adamts3 | JUC0500013062.mm.1 | -3,17  | 0,048399 | 0,560651                     |      |
| TC0500002719.mm.1 | 2,9 Adamts3 | JUC0500013048.mm.1 | -3,86  | 0,032198 | 0,518843                     |      |
| TC0500002719.mm.1 | 2,9 Adamts3 | JUC0500013047.mm.1 | -4,41  | 0,003585 | 0,356223                     |      |
| TC0500002719.mm.1 | 2,9 Adamts3 | JUC0500013058.mm.1 | -4,75  | 0,000114 | 0,267977                     |      |
| TC0500002719.mm.1 | 2,9 Adamts3 | JUC0500013051.mm.1 | -5     | 0,040159 | 0,541622                     |      |
| TC0500002719.mm.1 | 2,9 Adamts3 | PSR0500023963.mm.1 | -5,64  | 0,001994 | 0,341091 Alternative 3' Acce | 0,47 |
| TC0900002274.mm.1 | 2,27 Dixdc1 | PSR0900018967.mm.1 | 2,65   | 0,020126 | 0,47686 Cassette Exon        | 0,18 |
| TC0900002274.mm.1 | 2,27 Dixdc1 | JUC0900010687.mm.1 | 2,54   | 0,012754 | 0,436914                     |      |
| TC0900002274.mm.1 | 2,27 Dixdc1 | PSR0900018971.mm.1 | 2,43   | 0,02697  | 0,502831 Alternative 3' Acce | 0,18 |
| TC0900002274.mm.1 | 2,27 Dixdc1 | JUC0900010673.mm.1 | -2,25  | 0,009101 | 0,412874                     |      |
| TC0900002274.mm.1 | 2,27 Dixdc1 | PSR0900018963.mm.1 | -2,28  | 0,049272 | 0,562691 Alternative 5' Donc | 0,12 |
| TC0900002274.mm.1 | 2,27 Dixdc1 | PSR0900018976.mm.1 | -2,52  | 0,009597 | 0,417256 Alternative 5' Donc | 0,23 |
| TC0900002274.mm.1 | 2,27 Dixdc1 | JUC0900010690.mm.1 | -2,71  | 0,014133 | 0,447373                     |      |
| TC0900002274.mm.1 | 2,27 Dixdc1 | PSR0900018961.mm.1 | -3,07  | 0,011761 | 0,430069 Cassette Exon       | 0,14 |
| TC0900002274.mm.1 | 2,27 Dixdc1 | PSR0900018973.mm.1 | -3,37  | 0,008992 | 0,41198 Cassette Exon        | 0,22 |
| TC0900002274.mm.1 | 2,27 Dixdc1 | PSR0900018979.mm.1 | -4,39  | 0,007573 | 0,401638 Alternative 5' Donc | 0,41 |
| TC0900002274.mm.1 | 2,27 Dixdc1 | JUC0900010693.mm.1 | -4,57  | 0,021439 | 0,482126                     |      |
| TC1900000312.mm.1 | 1,38 Prune2 | JUC1900001624.mm.1 | 2,65   | 0,008141 | 0,405394                     |      |
| TC1900000312.mm.1 | 1,38 Prune2 | PSR1900003178.mm.1 | -2,06  | 0,023113 | 0,489756 Alternative 5' Donc | 0,23 |
| TC1900000312.mm.1 | 1,38 Prune2 | PSR1900003161.mm.1 | -2,06  | 0,001265 | 0,322251 Cassette Exon       | 0,15 |
| TC1900000312.mm.1 | 1,38 Prune2 | JUC1900001626.mm.1 | -2,21  | 0,021076 | 0,480371                     |      |
| TC1900000312.mm.1 | 1,38 Prune2 | PSR1900003153.mm.1 | -2,3   | 0,000842 | 0,311886 Cassette Exon       | 0,17 |

|                   |                         |                    |       |          |                              |      |
|-------------------|-------------------------|--------------------|-------|----------|------------------------------|------|
| TC1900000312.mm.1 | 1,38 Prune2             | PSR1900003152.mm.1 | -2,53 | 0,001924 | 0,34017 Cassette Exon        | 0,16 |
| TC1900000312.mm.1 | 1,38 Prune2             | PSR1900003157.mm.1 | -2,93 | 0,016162 | 0,457969 Cassette Exon       | 0,22 |
| TC0100001541.mm.1 | 2,02 Fam78b             | PSR0100012696.mm.1 | 2,65  | 0,006186 | 0,387873 Cassette Exon       | 0,15 |
| TC0100001541.mm.1 | 2,02 Fam78b             | PSR0100012698.mm.1 | -2,37 | 0,006349 | 0,389463 Alternative 5' Donc | 0,22 |
| TC1000001224.mm.1 | 2,37 Cep290             | JUC1000004946.mm.1 | 2,65  | 0,008587 | 0,40821                      |      |
| TC1000001224.mm.1 | 2,37 Cep290             | JUC1000004981.mm.1 | -2,04 | 0,000601 | 0,304044                     |      |
| TC1000001224.mm.1 | 2,37 Cep290             | JUC1000004943.mm.1 | -2,12 | 0,011396 | 0,427549                     |      |
| TC1000001224.mm.1 | 2,37 Cep290             | PSR1000009223.mm.1 | -2,87 | 0,016669 | 0,460057 Cassette Exon       | 0,17 |
| TC0900001639.mm.1 | -1,08 9530059O14Rik     | PSR0900013769.mm.1 | 2,65  | 0,022506 | 0,487114 Cassette Exon       | 0,16 |
| TC0700001402.mm.1 | 2,46 Pgm211             | JUC0700006163.mm.1 | 2,65  | 0,046184 | 0,555876                     |      |
| TC0700001402.mm.1 | 2,46 Pgm211             | JUC0700006172.mm.1 | 2,46  | 0,010726 | 0,423745                     |      |
| TC0700001402.mm.1 | 2,46 Pgm211             | PSR0700011889.mm.1 | 2,32  | 0,006416 | 0,389881 Cassette Exon       | 0,12 |
| TC0700001402.mm.1 | 2,46 Pgm211             | PSR0700011904.mm.1 | 2,15  | 0,036598 | 0,531454                     |      |
| TC0700001402.mm.1 | 2,46 Pgm211             | PSR0700011902.mm.1 | -2,35 | 0,002824 | 0,352207 Alternative 3' Acce | 0,04 |
| TC0700001402.mm.1 | 2,46 Pgm211             | PSR0700011884.mm.1 | -2,48 | 0,009554 | 0,41681 Alternative 3' Acce  | 0,13 |
| TC0700001402.mm.1 | 2,46 Pgm211             | JUC0700006165.mm.1 | -2,69 | 0,003937 | 0,359818                     |      |
| TC0700001402.mm.1 | 2,46 Pgm211             | JUC0700006171.mm.1 | -2,82 | 0,040855 | 0,543295                     |      |
| TC0700001402.mm.1 | 2,46 Pgm211             | JUC0700006174.mm.1 | -4,35 | 0,006196 | 0,387873                     |      |
| TC1400001188.mm.1 | -1,17 Scel              | JUC1400004998.mm.1 | 2,65  | 0,038159 | 0,535786                     |      |
| TC0200002945.mm.1 | -1,34 Itih2             | JUC0200012270.mm.1 | 2,65  | 0,02685  | 0,502454                     |      |
| TC1100004194.mm.1 | 1 Cep131; Gm25948; Azi1 | JUC1100020960.mm.1 | 2,65  | 0,033288 | 0,522367                     |      |
| TC1100004194.mm.1 | 1 Cep131; Gm25948; Azi1 | JUC1100020943.mm.1 | -2,01 | 0,021186 | 0,481033                     |      |
| TC0300003218.mm.1 | -1,15 Itga10            | JUC0300003937.mm.1 | 2,65  | 0,00286  | 0,352207                     |      |
| TC0300003218.mm.1 | -1,15 Itga10            | JUC0300003925.mm.1 | -2,27 | 0,033806 | 0,52387                      |      |
| TC0200004506.mm.1 | -1,17 Duox2             | JUC0200019767.mm.1 | 2,65  | 0,029485 | 0,510123                     |      |
| TC0200004506.mm.1 | -1,17 Duox2             | JUC0200019747.mm.1 | -3,35 | 0,020286 | 0,477245                     |      |
| TC0200004506.mm.1 | -1,17 Duox2             | JUC0200019765.mm.1 | -3,53 | 0,002247 | 0,34578                      |      |
| TC0200004815.mm.1 | -1,19 9230104L09Rik     | JUC0200021267.mm.1 | 2,65  | 0,037599 | 0,534053                     |      |
| TC0200002067.mm.1 | 1,29 Plcb4              | JUC0200008253.mm.1 | 2,65  | 0,047968 | 0,559552                     |      |
| TC0200002067.mm.1 | 1,29 Plcb4              | JUC0200008255.mm.1 | 2,06  | 0,000253 | 0,28803                      |      |
| TC0600001193.mm.1 | 1,07 Itpr1              | JUC0600004721.mm.1 | 2,65  | 0,029289 | 0,509874                     |      |
| TC1100000464.mm.1 | -1,11 Adam19            | JUC1100001874.mm.1 | 2,65  | 0,036197 | 0,530037                     |      |
| TC0300002047.mm.1 | 1,55 Clrn1              | JUC0300008115.mm.1 | 2,65  | 0,046948 | 0,557563                     |      |
| TC0300001670.mm.1 | -3,11                   | JUC0300006977.mm.1 | 2,65  | 0,021171 | 0,480978                     |      |
| TC1100001660.mm.1 | 1,17 Nbr1               | JUC1100008084.mm.1 | 2,65  | 0,019863 | 0,475704                     |      |
| TC1100001660.mm.1 | 1,17 Nbr1               | JUC1100008069.mm.1 | -2,06 | 0,044782 | 0,552442                     |      |
| TC1100001660.mm.1 | 1,17 Nbr1               | JUC1100008089.mm.1 | -2,31 | 0,00919  | 0,413763                     |      |
| TC0900003260.mm.1 | -1,08 Gm19385           | JUC0900015447.mm.1 | 2,65  | 0,029397 | 0,509995                     |      |
| TC0900001921.mm.1 | 1,02 Dpy19l1            | JUC0900009136.mm.1 | 2,65  | 0,022996 | 0,488935                     |      |
| TC1500000303.mm.1 | 5,35 Rims2              | JUC1500001273.mm.1 | 2,64  | 0,013115 | 0,439759                     |      |
| TC1500000303.mm.1 | 5,35 Rims2              | PSR1500002190.mm.1 | 2,43  | 0,012894 | 0,438165 Cassette Exon       | 0,23 |
| TC1500000303.mm.1 | 5,35 Rims2              | JUC1500001267.mm.1 | 2,14  | 0,003697 | 0,357266                     |      |
| TC1500000303.mm.1 | 5,35 Rims2              | JUC1500001268.mm.1 | 2,04  | 0,00963  | 0,417315                     |      |
| TC1500000303.mm.1 | 5,35 Rims2              | PSR1500002185.mm.1 | 2,02  | 0,022188 | 0,485756 Cassette Exon       | 0,04 |
| TC1500000303.mm.1 | 5,35 Rims2              | PSR1500002191.mm.1 | 2,01  | 0,006984 | 0,395722 Cassette Exon       | 0,14 |
| TC1500000303.mm.1 | 5,35 Rims2              | PSR1500002182.mm.1 | -2,09 | 0,023942 | 0,49258 Cassette Exon        | 0,37 |
| TC1500000303.mm.1 | 5,35 Rims2              | JUC1500001265.mm.1 | -2,31 | 0,006684 | 0,393187                     |      |
| TC1500000303.mm.1 | 5,35 Rims2              | JUC1500001285.mm.1 | -2,39 | 0,015128 | 0,452674                     |      |



|                   |                     |                    |        |          |                              |      |
|-------------------|---------------------|--------------------|--------|----------|------------------------------|------|
| TC1500000303.mm.1 | 5,35 Rims2          | PSR1500002214.mm.1 | -2,58  | 0,010692 | 0,423294 Alternative 5' Donc | 0,25 |
| TC1500000303.mm.1 | 5,35 Rims2          | PSR1500002179.mm.1 | -2,98  | 0,003555 | 0,356223 Cassette Exon       | 0,26 |
| TC1500000303.mm.1 | 5,35 Rims2          | PSR1500002209.mm.1 | -3,09  | 0,007429 | 0,399925 Cassette Exon       | 0,46 |
| TC1500000303.mm.1 | 5,35 Rims2          | JUC1500001261.mm.1 | -3,26  | 0,001118 | 0,317328                     |      |
| TC1500000303.mm.1 | 5,35 Rims2          | PSR1500002183.mm.1 | -3,42  | 0,000542 | 0,304044 Cassette Exon       | 0,41 |
| TC1500000303.mm.1 | 5,35 Rims2          | JUC1500001275.mm.1 | -3,79  | 0,004561 | 0,369273                     |      |
| TC1500000303.mm.1 | 5,35 Rims2          | JUC1500001276.mm.1 | -3,84  | 0,009989 | 0,418456                     |      |
| TC1500000303.mm.1 | 5,35 Rims2          | JUC1500001282.mm.1 | -3,87  | 0,017775 | 0,465534                     |      |
| TC1500000303.mm.1 | 5,35 Rims2          | PSR1500002204.mm.1 | -3,91  | 0,003954 | 0,359922 Cassette Exon       | 0,24 |
| TC1500000303.mm.1 | 5,35 Rims2          | PSR1500002181.mm.1 | -4,28  | 0,002868 | 0,352207 Cassette Exon       | 0,26 |
| TC1500000303.mm.1 | 5,35 Rims2          | PSR1500002208.mm.1 | -4,6   | 0,004102 | 0,36228                      |      |
| TC1500000303.mm.1 | 5,35 Rims2          | JUC1500001264.mm.1 | -4,67  | 0,001884 | 0,338712                     |      |
| TC1500000303.mm.1 | 5,35 Rims2          | JUC1500001281.mm.1 | -4,88  | 0,004432 | 0,366894                     |      |
| TC1500000303.mm.1 | 5,35 Rims2          | JUC1500001287.mm.1 | -5,3   | 0,00389  | 0,359225                     |      |
| TC1500000303.mm.1 | 5,35 Rims2          | PSR1500002180.mm.1 | -5,47  | 0,000113 | 0,267977 Cassette Exon       | 0,26 |
| TC1500000303.mm.1 | 5,35 Rims2          | JUC1500001290.mm.1 | -5,53  | 0,005165 | 0,376735                     |      |
| TC1500000303.mm.1 | 5,35 Rims2          | PSR1500002206.mm.1 | -5,86  | 0,006866 | 0,394116                     |      |
| TC1500000303.mm.1 | 5,35 Rims2          | JUC1500001295.mm.1 | -6,03  | 0,008243 | 0,405976                     |      |
| TC1500000303.mm.1 | 5,35 Rims2          | JUC1500001262.mm.1 | -6,32  | 0,00044  | 0,297771                     |      |
| TC1500000303.mm.1 | 5,35 Rims2          | PSR1500002207.mm.1 | -6,34  | 0,003377 | 0,354303                     |      |
| TC1500000303.mm.1 | 5,35 Rims2          | PSR1500002210.mm.1 | -6,37  | 0,000742 | 0,307808 Cassette Exon       | 0,44 |
| TC1500000303.mm.1 | 5,35 Rims2          | JUC1500001280.mm.1 | -6,61  | 0,015705 | 0,455416                     |      |
| TC1500000303.mm.1 | 5,35 Rims2          | PSR1500002184.mm.1 | -7,31  | 0,00309  | 0,353892 Cassette Exon       | 0,27 |
| TC1500000303.mm.1 | 5,35 Rims2          | JUC1500001297.mm.1 | -9     | 0,002845 | 0,352207                     |      |
| TC1500000303.mm.1 | 5,35 Rims2          | JUC1500001291.mm.1 | -9,21  | 0,000044 | 0,24627                      |      |
| TC1500000303.mm.1 | 5,35 Rims2          | PSR1500002178.mm.1 | -11,36 | 0,002365 | 0,34829 Cassette Exon        | 0,31 |
| TC0100003795.mm.1 | 1,45 Rps6kc1        | JUC0100017609.mm.1 | 2,64   | 0,034015 | 0,524484                     |      |
| TC0100003795.mm.1 | 1,45 Rps6kc1        | PSR0100031028.mm.1 | -2,06  | 0,03764  | 0,534204 Cassette Exon       | 0,07 |
| TC0100003795.mm.1 | 1,45 Rps6kc1        | JUC0100017592.mm.1 | -2,11  | 0,002847 | 0,352207                     |      |
| TC0100003795.mm.1 | 1,45 Rps6kc1        | JUC0100017606.mm.1 | -2,23  | 0,047353 | 0,558291                     |      |
| TC0100003795.mm.1 | 1,45 Rps6kc1        | PSR0100030995.mm.1 | -2,52  | 0,004169 | 0,3623 Cassette Exon         | 0,28 |
| TC0100003795.mm.1 | 1,45 Rps6kc1        | JUC0100017593.mm.1 | -3,61  | 0,001281 | 0,322251                     |      |
| TC0100003795.mm.1 | 1,45 Rps6kc1        | JUC0100017591.mm.1 | -4,95  | 0,000416 | 0,297771                     |      |
| TC0200003811.mm.1 | 1,42 Sestd1         | JUC0200016992.mm.1 | 2,64   | 0,004087 | 0,36228                      |      |
| TC0200003811.mm.1 | 1,42 Sestd1         | PSR0200032979.mm.1 | -2,02  | 0,007591 | 0,401712 Intron Retention    | 0,22 |
| TC0200003811.mm.1 | 1,42 Sestd1         | JUC0200016995.mm.1 | -2,03  | 0,020169 | 0,477086                     |      |
| TC1500000781.mm.1 | -1,3                | PSR1500006126.mm.1 | 2,64   | 0,042093 | 0,546488 Cassette Exon       | 0,2  |
| TC1500000781.mm.1 | -1,3                | JUC1500003435.mm.1 | 2,21   | 0,006266 | 0,388719                     |      |
| TC0700001185.mm.1 | 1,06 Sh3gl3         | PSR0700010448.mm.1 | 2,64   | 0,011119 | 0,426 Cassette Exon          | 0,15 |
| TC0700001185.mm.1 | 1,06 Sh3gl3         | PSR0700010456.mm.1 | -2,02  | 0,042097 | 0,546488 Alternative 5' Donc | 0,16 |
| TC0700001185.mm.1 | 1,06 Sh3gl3         | JUC0700005374.mm.1 | -2,44  | 0,040298 | 0,541823                     |      |
| TC0700002591.mm.1 | -1,78 Zfp111        | PSR0700022374.mm.1 | 2,64   | 0,014139 | 0,447453 Cassette Exon       | 0,16 |
| TC0700002591.mm.1 | -1,78 Zfp111        | PSR0700022366.mm.1 | 2,57   | 0,006572 | 0,39213 Alternative 3' Acce  | 0,15 |
| TC0700002591.mm.1 | -1,78 Zfp111        | PSR0700022367.mm.1 | 2,32   | 0,000752 | 0,308185 Alternative 3' Acce | 0,15 |
| TC0700002591.mm.1 | -1,78 Zfp111        | PSR0700022373.mm.1 | 2,14   | 0,012597 | 0,435933 Cassette Exon       | 0,16 |
| TC1800000684.mm.1 | -2,04               | PSR1800005062.mm.1 | 2,64   | 0,009123 | 0,413316 Cassette Exon       | 0,15 |
| TC0200002438.mm.1 | 1,33 Actr5; Mir3474 | PSR0200019818.mm.1 | 2,64   | 0,028326 | 0,506809 Cassette Exon       | 0,13 |
| TC0200002438.mm.1 | 1,33 Actr5; Mir3474 | JUC0200010050.mm.1 | -2,71  | 0,04468  | 0,55216                      |      |

|                   |                        |                     |       |          |          |                          |
|-------------------|------------------------|---------------------|-------|----------|----------|--------------------------|
| TC0X00001407.mm.1 | -1,24 Tmem164          | JUC0X00004413.mm.1  | 2,64  | 0,004762 | 0,371039 |                          |
| TC0X00001407.mm.1 | -1,24 Tmem164          | PSR0X00008927.mm.1  | 2,13  | 0,0062   | 0,387873 | Cassette Exon 0,11       |
| TC1300002303.mm.1 | -1,19 Slc6a19          | JUC1300007912.mm.1  | 2,64  | 0,00899  | 0,41198  |                          |
| TC0100000639.mm.1 | 1,56 Stk36             | JUC0100003059.mm.1  | 2,64  | 0,011876 | 0,431125 |                          |
| TC0100000639.mm.1 | 1,56 Stk36             | JUC0100003042.mm.1  | -2,35 | 0,00443  | 0,366832 |                          |
| TC0100000639.mm.1 | 1,56 Stk36             | JUC0100003065.mm.1  | -2,83 | 0,023712 | 0,491428 |                          |
| TC0100003273.mm.1 | -1,08 Lamc1            | JUC01000015194.mm.1 | 2,64  | 0,00011  | 0,267977 |                          |
| TC0200001007.mm.1 | 2,26 Bbs5              | JUC0200004035.mm.1  | 2,64  | 0,008839 | 0,410293 |                          |
| TC0200001007.mm.1 | 2,26 Bbs5              | JUC0200004034.mm.1  | 2,13  | 0,00399  | 0,360753 |                          |
| TC0200001007.mm.1 | 2,26 Bbs5              | JUC0200004037.mm.1  | -2,83 | 0,025298 | 0,497227 |                          |
| TC0200001007.mm.1 | 2,26 Bbs5              | JUC0200004043.mm.1  | -2,91 | 0,040415 | 0,541998 |                          |
| TC0400000458.mm.1 | -1,28 Glipr2           | JUC0400001569.mm.1  | 2,64  | 0,01936  | 0,473603 |                          |
| TC0400001238.mm.1 | -1,02 Mob3c            | JUC0400004759.mm.1  | 2,64  | 0,044284 | 0,551322 |                          |
| TC1000001605.mm.1 | 1,45 Rnf41             | JUC1000006373.mm.1  | 2,64  | 0,044798 | 0,552475 |                          |
| TC0X00001700.mm.1 | -1,43 Arhgap6          | JUC0X00005510.mm.1  | 2,64  | 0,034842 | 0,526823 |                          |
| TC0X00001700.mm.1 | -1,43 Arhgap6          | JUC0X00005517.mm.1  | 2,25  | 0,003154 | 0,353892 |                          |
| TC0400001974.mm.1 | 1,24 Eno1; Eno1b       | PSR0400016168.mm.1  | 2,63  | 0,042763 | 0,548097 | Alternative 3' Acce 0,26 |
| TC0400001974.mm.1 | 1,24 Eno1; Eno1b       | JUC0400008496.mm.1  | -6,06 | 0,037546 | 0,534001 |                          |
| TC0700001922.mm.1 | 1,03 Acadsb            | PSR0700016878.mm.1  | 2,63  | 0,043329 | 0,549369 | Alternative 5' Donc 0,26 |
| TC1900001360.mm.1 | -1,33 Dkk1             | PSR1900012072.mm.1  | 2,63  | 0,030734 | 0,514036 | Alternative 5' Donc 0,25 |
| TC1300000500.mm.1 | 1,3                    | PSR1300003034.mm.1  | 2,63  | 0,023166 | 0,489896 | Intron Retention 0,22    |
| TC1900000099.mm.1 | -1,14 Cdca5            | PSR1900001143.mm.1  | 2,63  | 0,047117 | 0,557905 | Cassette Exon 0,17       |
| TC1200001337.mm.1 | 1,31 Tmem196           | JUC1200005310.mm.1  | 2,63  | 0,002245 | 0,34578  |                          |
| TC1200001337.mm.1 | 1,31 Tmem196           | PSR1200009593.mm.1  | 2,09  | 0,012701 | 0,43642  | Cassette Exon 0,12       |
| TC0500002233.mm.1 | 1,43 Gm15513           | PSR0500020421.mm.1  | 2,63  | 0,01124  | 0,426718 | Cassette Exon 0,11       |
| TC0900001022.mm.1 | 1,72 Hmgcll1           | PSR0900008085.mm.1  | 2,63  | 0,039421 | 0,539611 | Cassette Exon 0,11       |
| TC1100003604.mm.1 | -1,52 Igf2bp1; Mir3063 | JUC1100017303.mm.1  | 2,63  | 0,008381 | 0,4065   |                          |
| TC1100003604.mm.1 | -1,52 Igf2bp1; Mir3063 | JUC1100017310.mm.1  | 2,51  | 0,021432 | 0,482126 |                          |
| TC1100003604.mm.1 | -1,52 Igf2bp1; Mir3063 | PSR1100033051.mm.1  | 2,01  | 0,005799 | 0,383104 | Cassette Exon 0,1        |
| TC1400001710.mm.1 | -1,01 Gm15512          | JUC1400007281.mm.1  | 2,63  | 0,024833 | 0,495408 |                          |
| TC0100000892.mm.1 | -1,37 Scly             | JUC0100004336.mm.1  | 2,63  | 0,025011 | 0,496061 |                          |
| TC0100000892.mm.1 | -1,37 Scly             | JUC0100004318.mm.1  | 2,3   | 0,03205  | 0,518459 |                          |
| TC0800001414.mm.1 | -1,2 Cdh13             | JUC0800006289.mm.1  | 2,63  | 0,036763 | 0,531925 |                          |
| TC0800001202.mm.1 | -1,32 Ces4a            | JUC0800005072.mm.1  | 2,63  | 0,028771 | 0,508148 |                          |
| TC0800002949.mm.1 | 1,49 Wdr59             | JUC0800012446.mm.1  | 2,63  | 0,048721 | 0,561355 |                          |
| TC0800002949.mm.1 | 1,49 Wdr59             | JUC0800012433.mm.1  | -3,36 | 0,041536 | 0,544809 |                          |
| TC0500003514.mm.1 | 1,16 Iqce              | JUC0500017532.mm.1  | 2,63  | 0,017111 | 0,462232 |                          |
| TC1000002248.mm.1 | 1,05 H2afy2            | JUC1000008680.mm.1  | 2,63  | 0,042245 | 0,547034 |                          |
| TC0400003324.mm.1 | -1,66                  | JUC0400013806.mm.1  | 2,63  | 0,022181 | 0,485756 |                          |
| TC0400001854.mm.1 | -1,25 Gm13177          | JUC0400007992.mm.1  | 2,63  | 0,020229 | 0,477145 |                          |
| TC1000000656.mm.1 | -1,09 Rhobtb1          | JUC1000002440.mm.1  | 2,63  | 0,008047 | 0,40434  |                          |
| TC1000000656.mm.1 | -1,09 Rhobtb1          | JUC1000002447.mm.1  | 2,46  | 0,005487 | 0,379939 |                          |
| TC0X00002995.mm.1 | 1,21 Gla               | JUC0X00009450.mm.1  | 2,63  | 0,032432 | 0,519471 |                          |
| TC0600000231.mm.1 | 1,69 Ccdc136; Gm26220  | JUC0600000751.mm.1  | 2,62  | 0,010598 | 0,422764 |                          |
| TC0600000231.mm.1 | 1,69 Ccdc136; Gm26220  | JUC0600000758.mm.1  | 2,53  | 0,032892 | 0,521149 |                          |
| TC0600000231.mm.1 | 1,69 Ccdc136; Gm26220  | PSR0600001522.mm.1  | -4,25 | 0,008437 | 0,406611 | Alternative 5' Donc 0,48 |
| TC0100000588.mm.1 | 1,89 Vwc2l             | PSR0100004738.mm.1  | 2,62  | 0,042798 | 0,548097 | Alternative 5' Donc 0,39 |
| TC0100000588.mm.1 | 1,89 Vwc2l             | PSR0100004734.mm.1  | 2,5   | 0,004068 | 0,361956 | Alternative 5' Donc 0,12 |

|                   |                               |                    |       |          |                              |      |
|-------------------|-------------------------------|--------------------|-------|----------|------------------------------|------|
| TC0100000588.mm.1 | 1,89 Vwc2l                    | PSR0100004740.mm.1 | -2,58 | 0,018971 | 0,471398 Cassette Exon       | 0,12 |
| TC0100000588.mm.1 | 1,89 Vwc2l                    | JUC0100002789.mm.1 | -2,8  | 0,014417 | 0,448786                     |      |
| TC0100000588.mm.1 | 1,89 Vwc2l                    | JUC0100002785.mm.1 | -4,98 | 0,005336 | 0,378059                     |      |
| TC1900001078.mm.1 | 1,18                          | PSR1900010093.mm.1 | 2,62  | 0,039044 | 0,538264 Alternative 3' Acce | 0,26 |
| TC0100003320.mm.1 | -1,14 Tor3a                   | PSR0100027189.mm.1 | 2,62  | 0,043787 | 0,550404 Alternative 5' Donc | 0,25 |
| TC0400001766.mm.1 | -1,77 Rcc2; Gm25951           | PSR0400014556.mm.1 | 2,62  | 0,028117 | 0,506228 Cassette Exon       | 0,22 |
| TC0400001766.mm.1 | -1,77 Rcc2; Gm25951           | JUC0400007654.mm.1 | 2,48  | 0,005006 | 0,373851                     |      |
| TC0400001766.mm.1 | -1,77 Rcc2; Gm25951           | PSR0400014560.mm.1 | 2,18  | 0,006518 | 0,391382 Cassette Exon       | 0,17 |
| TC0300002543.mm.1 | -1,27 Pde4dip; Mir7225; mmu-n | PSR0300019885.mm.1 | 2,62  | 0,046171 | 0,555838 Cassette Exon       | 0,17 |
| TC0300002543.mm.1 | -1,27 Pde4dip; Mir7225; mmu-n | PSR0300019865.mm.1 | 2,22  | 0,009364 | 0,41516 Alternative 3' Acce  | 0,09 |
| TC0300002543.mm.1 | -1,27 Pde4dip; Mir7225; mmu-n | JUC0300010312.mm.1 | -2,08 | 0,013765 | 0,444925                     |      |
| TC0300002543.mm.1 | -1,27 Pde4dip; Mir7225; mmu-n | PSR0300019835.mm.1 | -2,68 | 0,008632 | 0,408463 Alternative 3' Acce | 0,21 |
| TC0X00003017.mm.1 | -1,55                         | JUC0X00009578.mm.1 | 2,62  | 0,020829 | 0,47952                      |      |
| TC0X00003017.mm.1 | -1,55                         | PSR0X00018906.mm.1 | 2,3   | 0,016687 | 0,460085 Cassette Exon       | 0,19 |
| TC0X00000437.mm.1 | 1,22 Slc25a14                 | JUC0X00001475.mm.1 | 2,62  | 0,018835 | 0,470905                     |      |
| TC0X00000437.mm.1 | 1,22 Slc25a14                 | JUC0X00001488.mm.1 | 2,28  | 0,009565 | 0,416927                     |      |
| TC0X00000437.mm.1 | 1,22 Slc25a14                 | PSR0X00002937.mm.1 | -2,54 | 0,007632 | 0,402047 Cassette Exon       | 0,18 |
| TC0300002828.mm.1 | 2,09 Ptbp2                    | JUC0300011652.mm.1 | 2,62  | 0,00131  | 0,323877                     |      |
| TC0300002828.mm.1 | 2,09 Ptbp2                    | JUC0300011655.mm.1 | 2,44  | 0,030064 | 0,511856                     |      |
| TC0300002828.mm.1 | 2,09 Ptbp2                    | PSR0300022368.mm.1 | -2,02 | 0,046448 | 0,556553 Cassette Exon       | 0,09 |
| TC0300002828.mm.1 | 2,09 Ptbp2                    | PSR0300022372.mm.1 | -2,23 | 0,006221 | 0,387912 Alternative 5' Donc | 0,17 |
| TC1400002805.mm.1 | 1,77 Trav6n-6                 | PSR1400005133.mm.1 | 2,62  | 0,000158 | 0,272178                     |      |
| TC1400002805.mm.1 | 1,77 Trav6n-6                 | PSR1400020710.mm.1 | -2,62 | 0,000158 | 0,272178 Cassette Exon       | 0,17 |
| TC1200000670.mm.1 | -1,92                         | PSR1200004603.mm.1 | 2,62  | 0,007419 | 0,399901 Cassette Exon       | 0,15 |
| TC0200001498.mm.1 | -1,32                         | JUC0200005666.mm.1 | 2,62  | 0,01181  | 0,430377                     |      |
| TC0800001078.mm.1 | 1,41 Lpcat2                   | JUC0800004425.mm.1 | 2,62  | 0,036769 | 0,531966                     |      |
| TC0800000659.mm.1 | -1,4 Ddx60                    | JUC0800002404.mm.1 | 2,62  | 0,048929 | 0,5618                       |      |
| TC0800000659.mm.1 | -1,4 Ddx60                    | JUC0800002386.mm.1 | 2,29  | 0,007538 | 0,401261                     |      |
| TC0700001773.mm.1 | -1,15 Lcmt1                   | JUC0700007950.mm.1 | 2,62  | 0,001743 | 0,335996                     |      |
| TC0700002061.mm.1 | 1,19 Muc2; MUC2               | JUC0700009722.mm.1 | 2,62  | 0,038044 | 0,535548                     |      |
| TC0700002061.mm.1 | 1,19 Muc2; MUC2               | JUC0700009759.mm.1 | -3,57 | 0,026416 | 0,501198                     |      |
| TC0400003780.mm.1 | -1,04 Gm13009                 | JUC0400016202.mm.1 | 2,62  | 0,007183 | 0,397855                     |      |
| TC0700003552.mm.1 | 2,06 Mfge8                    | JUC0700015822.mm.1 | 2,61  | 0,002058 | 0,341838                     |      |
| TC0700003552.mm.1 | 2,06 Mfge8                    | JUC0700015821.mm.1 | 2,49  | 0,046796 | 0,557041                     |      |
| TC0700003552.mm.1 | 2,06 Mfge8                    | PSR0700029997.mm.1 | -2,01 | 0,019768 | 0,475035 Alternative 5' Donc | 0,27 |
| TC1000000851.mm.1 | 1,4 Apc2                      | PSR1000006490.mm.1 | 2,61  | 0,044936 | 0,552848 Cassette Exon       | 0,15 |
| TC1000000851.mm.1 | 1,4 Apc2                      | PSR1000006489.mm.1 | 2,34  | 0,003577 | 0,356223 Cassette Exon       | 0,16 |
| TC1000000851.mm.1 | 1,4 Apc2                      | PSR1000006474.mm.1 | 2,29  | 0,026496 | 0,501252 Cassette Exon       | 0,12 |
| TC1000000851.mm.1 | 1,4 Apc2                      | PSR1000006473.mm.1 | -2,03 | 0,01341  | 0,442624 Intron Retention    | 0,25 |
| TC1000000851.mm.1 | 1,4 Apc2                      | JUC1000003496.mm.1 | -2,25 | 0,045466 | 0,554267                     |      |
| TC1100000956.mm.1 | -1,34 Pld2                    | PSR1100008436.mm.1 | 2,61  | 0,048709 | 0,561355 Alternative 3' Acce | 0,24 |
| TC1100004158.mm.1 | -1,8 BC100451                 | PSR1100039535.mm.1 | 2,61  | 0,003506 | 0,355749 Alternative 5' Donc | 0,24 |
| TC0400001327.mm.1 | -1,88 Ccdc23                  | PSR0400010036.mm.1 | 2,61  | 0,037181 | 0,533188 Alternative 3' Acce | 0,23 |
| TC0500000381.mm.1 | -1,02 Add1; Mir7036b; mmu-mi  | PSR0500003682.mm.1 | 2,61  | 0,017138 | 0,46232 Cassette Exon        | 0,18 |
| TC0500000381.mm.1 | -1,02 Add1; Mir7036b; mmu-mi  | JUC0500002039.mm.1 | -2,02 | 0,030639 | 0,513746                     |      |
| TC0400000705.mm.1 | 1,05 Rgs3                     | JUC0400002519.mm.1 | 2,61  | 0,024131 | 0,493245                     |      |
| TC0400000705.mm.1 | 1,05 Rgs3                     | PSR0400005018.mm.1 | 2,34  | 0,012001 | 0,432286 Cassette Exon       | 0,16 |
| TC0400000705.mm.1 | 1,05 Rgs3                     | JUC0400002498.mm.1 | 2,02  | 0,038064 | 0,535633                     |      |

|                   |                     |                    |        |          |                              |      |
|-------------------|---------------------|--------------------|--------|----------|------------------------------|------|
| TC0X00001625.mm.1 | -1,15 Sh3kbp1       | JUC0X00005146.mm.1 | 2,61   | 0,043539 | 0,549995                     |      |
| TC0X00001625.mm.1 | -1,15 Sh3kbp1       | PSR0X00010244.mm.1 | 2,09   | 0,04894  | 0,5618 Cassette Exon         | 0,16 |
| TC0X00001625.mm.1 | -1,15 Sh3kbp1       | JUC0X00005170.mm.1 | 2,06   | 0,003562 | 0,356223                     |      |
| TC0100002073.mm.1 | -1,14 Col19a1       | PSR0100016873.mm.1 | 2,61   | 0,005341 | 0,378188 Alternative 5' Donc | 0,14 |
| TC1500002310.mm.1 | 2,19 Smug1          | PSR1500019150.mm.1 | 2,61   | 0,00093  | 0,313363 Alternative 5' Donc | 0,14 |
| TC1500002310.mm.1 | 2,19 Smug1          | JUC1500010929.mm.1 | -4,67  | 0,02332  | 0,490065                     |      |
| TC1500002310.mm.1 | 2,19 Smug1          | JUC1500010936.mm.1 | -4,8   | 0,030787 | 0,514144                     |      |
| TC0400001933.mm.1 | -1,07 Exosc10       | JUC0400008315.mm.1 | 2,61   | 0,011403 | 0,427549                     |      |
| TC0400001933.mm.1 | -1,07 Exosc10       | PSR0400015839.mm.1 | 2,1    | 0,00444  | 0,367041 Cassette Exon       | 0,1  |
| TC1700001348.mm.1 | 1,47 Pisd-ps2       | JUC1700006688.mm.1 | 2,61   | 0,038005 | 0,535454                     |      |
| TC1700001348.mm.1 | 1,47 Pisd-ps2       | PSR1700012254.mm.1 | 2,44   | 0,02811  | 0,506167                     |      |
| TC1700001348.mm.1 | 1,47 Pisd-ps2       | JUC1700006681.mm.1 | -2,19  | 0,023306 | 0,490004                     |      |
| TC1700001348.mm.1 | 1,47 Pisd-ps2       | PSR1700012248.mm.1 | -2,45  | 0,015932 | 0,456765 Cassette Exon       | 0,09 |
| TC1200001506.mm.1 | -1,09 Gm10476       | JUC1200005817.mm.1 | 2,61   | 0,006199 | 0,387873                     |      |
| TC1900000028.mm.1 | -1,76 Tmem134       | JUC1900000207.mm.1 | 2,61   | 0,049926 | 0,56393                      |      |
| TC1900000028.mm.1 | -1,76 Tmem134       | JUC1900000201.mm.1 | 2,09   | 0,043874 | 0,550542                     |      |
| TC1600000421.mm.1 | -1,28 Mfi2          | JUC1600002030.mm.1 | 2,61   | 0,031315 | 0,516204                     |      |
| TC0500002102.mm.1 | 1,07 Kmt2c          | JUC0500010440.mm.1 | 2,61   | 0,033218 | 0,522175                     |      |
| TC0500000790.mm.1 | 1,07 Ythdc1         | JUC0500003750.mm.1 | 2,61   | 0,026467 | 0,501252                     |      |
| TC0600001515.mm.1 | -1,02 Clec2h        | JUC0600006508.mm.1 | 2,61   | 0,025862 | 0,498741                     |      |
| TC1100003075.mm.1 | -1,18 2810408A11Rik | JUC1100014815.mm.1 | 2,61   | 0,007972 | 0,403853                     |      |
| TC0300002343.mm.1 | -1,53 Slc50a1       | JUC0300009393.mm.1 | 2,61   | 0,022021 | 0,485226                     |      |
| TC1000000726.mm.1 | -1,1 Derl3          | JUC100002833.mm.1  | 2,61   | 0,01769  | 0,465018                     |      |
| TC0900002869.mm.1 | 7,78 Trpc1          | JUC0900013205.mm.1 | 2,6    | 0,011545 | 0,42877                      |      |
| TC0900002869.mm.1 | 7,78 Trpc1          | JUC0900013204.mm.1 | 2,58   | 0,009383 | 0,415457                     |      |
| TC0900002869.mm.1 | 7,78 Trpc1          | JUC0900013208.mm.1 | -2,59  | 0,031668 | 0,517405                     |      |
| TC0900002869.mm.1 | 7,78 Trpc1          | PSR0900023620.mm.1 | -4,07  | 0,004706 | 0,370888 Alternative 3' Acce | 0,54 |
| TC0900002869.mm.1 | 7,78 Trpc1          | PSR0900023624.mm.1 | -4,13  | 0,004673 | 0,370181 Alternative 5' Donc | 0,47 |
| TC0900002869.mm.1 | 7,78 Trpc1          | PSR0900023622.mm.1 | -4,63  | 0,002335 | 0,347265 Intron Retention    | 0,74 |
| TC0900002869.mm.1 | 7,78 Trpc1          | JUC0900013202.mm.1 | -5,67  | 0,002142 | 0,343679                     |      |
| TC0900002869.mm.1 | 7,78 Trpc1          | PSR0900023631.mm.1 | -9,11  | 0,004237 | 0,363295 Cassette Exon       | 0,27 |
| TC0200004813.mm.1 | 12,43 Napb          | JUC0200021262.mm.1 | 2,6    | 0,016312 | 0,45857                      |      |
| TC0200004813.mm.1 | 12,43 Napb          | PSR0200041071.mm.1 | -2,52  | 0,015232 | 0,452839 Alternative 3' Acce | 0,14 |
| TC0200004813.mm.1 | 12,43 Napb          | JUC0200021253.mm.1 | -4,13  | 0,031386 | 0,516345                     |      |
| TC0200004813.mm.1 | 12,43 Napb          | JUC0200021260.mm.1 | -5,16  | 0,01437  | 0,448293                     |      |
| TC0200004813.mm.1 | 12,43 Napb          | PSR0200041081.mm.1 | -5,48  | 0,001211 | 0,322251 Alternative 3' Acce | 0,51 |
| TC0200004813.mm.1 | 12,43 Napb          | PSR0200041087.mm.1 | -8,73  | 0,001885 | 0,338712 Cassette Exon       | 0,41 |
| TC0200004813.mm.1 | 12,43 Napb          | PSR0200041084.mm.1 | -10,02 | 0,000974 | 0,314364 Intron Retention    | 0,68 |
| TC0200004813.mm.1 | 12,43 Napb          | PSR0200041091.mm.1 | -13,74 | 0,002699 | 0,349612 Cassette Exon       | 0,41 |
| TC1800000924.mm.1 | 1,11 Crem           | PSR1800006769.mm.1 | 2,6    | 0,013295 | 0,441721 Alternative 5' Donc | 0,26 |
| TC1800000924.mm.1 | 1,11 Crem           | JUC1800003744.mm.1 | 2,33   | 0,021508 | 0,482741                     |      |
| TC1800000924.mm.1 | 1,11 Crem           | PSR1800006730.mm.1 | -3,48  | 0,01324  | 0,441329 Alternative 5' Donc | 0,37 |
| TC1400002290.mm.1 | -1,2 Cdca2          | PSR1400017699.mm.1 | 2,6    | 0,002046 | 0,341377 Alternative 5' Donc | 0,26 |
| TC0200003707.mm.1 | -1,72 Gm16292       | PSR0200031752.mm.1 | 2,6    | 0,027411 | 0,503961 Alternative 3' Acce | 0,25 |
| TC1600000526.mm.1 | 1,51 lqcb1          | JUC1600002592.mm.1 | 2,6    | 0,007263 | 0,39826                      |      |
| TC1600000526.mm.1 | 1,51 lqcb1          | JUC1600002597.mm.1 | -2,77  | 0,009839 | 0,417839                     |      |
| TC1600000526.mm.1 | 1,51 lqcb1          | PSR1600004924.mm.1 | -2,93  | 0,041243 | 0,544166 Alternative 5' Donc | 0,25 |
| TC0100002724.mm.1 | -1,46               | PSR0100022037.mm.1 | 2,6    | 0,01167  | 0,429939 Alternative 3' Acce | 0,24 |

|                   |                            |                    |       |          |                              |      |
|-------------------|----------------------------|--------------------|-------|----------|------------------------------|------|
| TC0700004629.mm.1 | -1,27 Setd1a               | PSR0700016021.mm.1 | 2,6   | 0,017904 | 0,466466 Alternative 5' Donc | 0,23 |
| TC1500000897.mm.1 | -1,42 Lrrk2                | JUC1500003983.mm.1 | 2,6   | 0,018502 | 0,468972                     |      |
| TC1500000897.mm.1 | -1,42 Lrrk2                | PSR1500007121.mm.1 | 2,56  | 0,037066 | 0,532747 Cassette Exon       | 0,16 |
| TC1500000897.mm.1 | -1,42 Lrrk2                | PSR1500007101.mm.1 | 2,51  | 0,02588  | 0,498873 Cassette Exon       | 0,21 |
| TC1500000897.mm.1 | -1,42 Lrrk2                | JUC1500004016.mm.1 | 2,26  | 0,019586 | 0,474672                     |      |
| TC1500000897.mm.1 | -1,42 Lrrk2                | PSR1500007090.mm.1 | 2,05  | 0,027144 | 0,503137 Cassette Exon       | 0,09 |
| TC1400000988.mm.1 | 1,26 Pebp4                 | JUC1400004271.mm.1 | 2,6   | 0,036698 | 0,531756                     |      |
| TC1400000988.mm.1 | 1,26 Pebp4                 | PSR1400007952.mm.1 | -2,13 | 0,018409 | 0,468484 Cassette Exon       | 0,18 |
| TC1400000988.mm.1 | 1,26 Pebp4                 | PSR1400007950.mm.1 | -2,25 | 0,024516 | 0,493992 Cassette Exon       | 0,04 |
| TC1400000988.mm.1 | 1,26 Pebp4                 | JUC1400004273.mm.1 | -2,76 | 0,022699 | 0,487767                     |      |
| TC1400000988.mm.1 | 1,26 Pebp4                 | JUC1400004269.mm.1 | -6,19 | 0,012981 | 0,439245                     |      |
| TC1100001095.mm.1 | -1,6 Fam57a; 4932415L08RIK | PSR1100009969.mm.1 | 2,6   | 0,000998 | 0,316361 Cassette Exon       | 0,15 |
| TC1400001934.mm.1 | -1,48                      | JUC1400008010.mm.1 | 2,6   | 0,020263 | 0,477245                     |      |
| TC0500001853.mm.1 | -1,63 B3glct; B3galtl      | JUC0500009254.mm.1 | 2,6   | 0,018003 | 0,466939                     |      |
| TC0500001853.mm.1 | -1,63 B3glct; B3galtl      | JUC0500009256.mm.1 | 2,27  | 0,018348 | 0,468287                     |      |
| TC0900000842.mm.1 | -1,28 Rasl12               | JUC0900003470.mm.1 | 2,6   | 0,016566 | 0,459612                     |      |
| TC0600001239.mm.1 | -1,21 Setd5                | JUC0600004890.mm.1 | 2,6   | 0,045557 | 0,554404                     |      |
| TC0600001239.mm.1 | -1,21 Setd5                | JUC0600004882.mm.1 | 2,47  | 0,041528 | 0,544763                     |      |
| TC1000001570.mm.1 | -1,02 Myo1a                | JUC1000006073.mm.1 | 2,6   | 0,031324 | 0,516204                     |      |
| TC1000001570.mm.1 | -1,02 Myo1a                | JUC1000006084.mm.1 | -2,22 | 0,026375 | 0,501                        |      |
| TC0700000424.mm.1 | -2,18 Tgfb1                | PSR0700003315.mm.1 | 2,59  | 0,012126 | 0,432868 Intron Retention    | 0,33 |
| TC0900000085.mm.1 | -2,17                      | PSR0900000612.mm.1 | 2,59  | 0,040317 | 0,541838 Alternative 5' Donc | 0,25 |
| TC1800001544.mm.1 | 1,65 Dcc                   | PSR1800011321.mm.1 | 2,59  | 0,00127  | 0,322251 Cassette Exon       | 0,13 |
| TC1800001544.mm.1 | 1,65 Dcc                   | JUC1800006315.mm.1 | 2,54  | 0,003202 | 0,354243                     |      |
| TC1800001544.mm.1 | 1,65 Dcc                   | JUC1800006319.mm.1 | 2,43  | 0,025798 | 0,498529                     |      |
| TC1800001544.mm.1 | 1,65 Dcc                   | PSR1800011340.mm.1 | 2,32  | 0,01349  | 0,44319 Cassette Exon        | 0,1  |
| TC1800001544.mm.1 | 1,65 Dcc                   | JUC1800006329.mm.1 | -2,01 | 0,043049 | 0,54841                      |      |
| TC1800001544.mm.1 | 1,65 Dcc                   | PSR1800011343.mm.1 | -2,03 | 0,036077 | 0,529704 Alternative 3' Acce | 0,19 |
| TC1800001544.mm.1 | 1,65 Dcc                   | PSR1800011325.mm.1 | -2,08 | 0,015746 | 0,455416 Cassette Exon       | 0,17 |
| TC1800001544.mm.1 | 1,65 Dcc                   | JUC1800006327.mm.1 | -2,12 | 0,00185  | 0,337414                     |      |
| TC1800001544.mm.1 | 1,65 Dcc                   | PSR1800011324.mm.1 | -2,25 | 0,029216 | 0,509515 Cassette Exon       | 0,22 |
| TC1800001544.mm.1 | 1,65 Dcc                   | JUC1800006332.mm.1 | -2,67 | 0,036766 | 0,531925                     |      |
| TC1800001544.mm.1 | 1,65 Dcc                   | PSR1800011315.mm.1 | -2,71 | 0,025714 | 0,498173 Cassette Exon       | 0,23 |
| TC1800001544.mm.1 | 1,65 Dcc                   | PSR1800011339.mm.1 | -2,71 | 0,005462 | 0,379939 Alternative 3' Acce | 0,22 |
| TC1800001544.mm.1 | 1,65 Dcc                   | JUC1800006325.mm.1 | -2,96 | 0,018146 | 0,467399                     |      |
| TC1800001544.mm.1 | 1,65 Dcc                   | JUC1800006314.mm.1 | -4,42 | 0,012139 | 0,432868                     |      |
| TC0100002793.mm.1 | -1,09 Rab17                | PSR0100022617.mm.1 | 2,59  | 0,040043 | 0,541323 Alternative 5' Donc | 0,22 |
| TC1300000496.mm.1 | -1,22 Gm20751              | PSR1300003004.mm.1 | 2,59  | 0,045283 | 0,553724 Cassette Exon       | 0,15 |
| TC1300000105.mm.1 | -2,07 Gli3                 | PSR1300000784.mm.1 | 2,59  | 0,022883 | 0,488524 Alternative 3' Acce | 0,13 |
| TC1300000105.mm.1 | -2,07 Gli3                 | JUC1300000482.mm.1 | 2,51  | 0,007459 | 0,400326                     |      |
| TC1300000105.mm.1 | -2,07 Gli3                 | PSR1300000783.mm.1 | 2,27  | 0,01855  | 0,469405 Cassette Exon       | 0,12 |
| TC0100000824.mm.1 | 1,37 Atg16l1               | PSR0100007018.mm.1 | 2,59  | 0,000811 | 0,311886 Alternative 3' Acce | 0,1  |
| TC0100000824.mm.1 | 1,37 Atg16l1               | PSR0100007019.mm.1 | 2,09  | 0,008879 | 0,410619 Cassette Exon       | 0,1  |
| TC0700000811.mm.1 | 1,37 Kcnc3                 | PSR0700006735.mm.1 | 2,59  | 0,034139 | 0,524882 Cassette Exon       | 0,05 |
| TC0700000811.mm.1 | 1,37 Kcnc3                 | JUC0700003346.mm.1 | -2,07 | 0,031325 | 0,516208                     |      |
| TC0700000811.mm.1 | 1,37 Kcnc3                 | JUC0700003343.mm.1 | -3,12 | 0,024629 | 0,494656                     |      |
| TC1400002357.mm.1 | -1,56                      | JUC1400010183.mm.1 | 2,59  | 0,023251 | 0,490032                     |      |
| TC0200004481.mm.1 | 1,12 Zscan29               | JUC0200019472.mm.1 | 2,59  | 0,007669 | 0,402377                     |      |

|                   |                               |                    |       |          |                              |      |
|-------------------|-------------------------------|--------------------|-------|----------|------------------------------|------|
| TC1300000569.mm.1 | -2,12 Ogn                     | JUC1300001811.mm.1 | 2,59  | 0,02024  | 0,477187                     |      |
| TC1300000569.mm.1 | -2,12 Ogn                     | JUC1300001807.mm.1 | 2,03  | 0,021319 | 0,481723                     |      |
| TC0100000946.mm.1 | -1,1 Ing5                     | JUC0100004627.mm.1 | 2,59  | 0,04348  | 0,549896                     |      |
| TC1800001748.mm.1 | 1,39 Apbb3                    | JUC1800004917.mm.1 | 2,59  | 0,034052 | 0,524583                     |      |
| TC1900000523.mm.1 | 1,56 Btaf1                    | JUC1900002458.mm.1 | 2,59  | 0,016595 | 0,459691                     |      |
| TC1900000523.mm.1 | 1,56 Btaf1                    | JUC1900002485.mm.1 | -2,19 | 0,042904 | 0,548218                     |      |
| TC1700000385.mm.1 | 1,26 Narfl; Mir6966; mmu-mir- | JUC1700001758.mm.1 | 2,59  | 0,002443 | 0,349135                     |      |
| TC0700000017.mm.1 | -2,07 Gm15929                 | JUC0700000102.mm.1 | 2,59  | 0,008902 | 0,410728                     |      |
| TC0700000017.mm.1 | -2,07 Gm15929                 | JUC0700000101.mm.1 | 2,47  | 0,000104 | 0,263684                     |      |
| TC0700003603.mm.1 | -1,17                         | JUC0700016179.mm.1 | 2,59  | 0,012956 | 0,438944                     |      |
| TC1100001987.mm.1 | -1,76                         | JUC1100009815.mm.1 | 2,59  | 0,017382 | 0,463704                     |      |
| TC0400004000.mm.1 | -1 Zfp933                     | JUC0400017194.mm.1 | 2,59  | 0,001285 | 0,322384                     |      |
| TC0X00002470.mm.1 | -1,09 Mpp1                    | JUC0X00008036.mm.1 | 2,59  | 0,020995 | 0,480143                     |      |
| TC0400002987.mm.1 | 2,39 Slc24a2                  | PSR0400024189.mm.1 | 2,58  | 0,021204 | 0,48113 Alternative 3' Acce  | 0,15 |
| TC0400002987.mm.1 | 2,39 Slc24a2                  | JUC0400012622.mm.1 | -2,08 | 0,039935 | 0,540973                     |      |
| TC0400002987.mm.1 | 2,39 Slc24a2                  | JUC0400012624.mm.1 | -2,18 | 0,025209 | 0,49669                      |      |
| TC0400002987.mm.1 | 2,39 Slc24a2                  | PSR0400024206.mm.1 | -2,63 | 0,019219 | 0,472971 Alternative 3' Acce | 0,29 |
| TC0400002987.mm.1 | 2,39 Slc24a2                  | PSR0400024211.mm.1 | -2,64 | 0,037782 | 0,534693 Alternative 5' Donc | 0,24 |
| TC0400002987.mm.1 | 2,39 Slc24a2                  | PSR0400024209.mm.1 | -2,88 | 0,01085  | 0,424161 Alternative 3' Acce | 0,29 |
| TC0400002987.mm.1 | 2,39 Slc24a2                  | PSR0400024194.mm.1 | -3,08 | 0,014387 | 0,44839 Cassette Exon        | 0,2  |
| TC0400002987.mm.1 | 2,39 Slc24a2                  | PSR0400024218.mm.1 | -3,15 | 0,012096 | 0,43255 Cassette Exon        | 0,22 |
| TC0400002987.mm.1 | 2,39 Slc24a2                  | JUC0400012633.mm.1 | -3,24 | 0,036087 | 0,529712                     |      |
| TC0400002987.mm.1 | 2,39 Slc24a2                  | JUC0400012636.mm.1 | -3,77 | 0,014719 | 0,45037                      |      |
| TC0400002987.mm.1 | 2,39 Slc24a2                  | PSR0400024205.mm.1 | -4,2  | 0,012806 | 0,437316 Alternative 3' Acce | 0,29 |
| TC0400002987.mm.1 | 2,39 Slc24a2                  | JUC0400012632.mm.1 | -4,3  | 0,015664 | 0,455416                     |      |
| TC0700000102.mm.1 | -2,03 Mir5620; Gm23572        | PSR0700000973.mm.1 | 2,58  | 0,005887 | 0,383835 Alternative 3' Acce | 0,25 |
| TC0900000494.mm.1 | 3,43                          | PSR0900003232.mm.1 | 2,58  | 0,003883 | 0,359196 Cassette Exon       | 0,21 |
| TC0900000494.mm.1 | 3,43                          | JUC0900001646.mm.1 | 2,48  | 0,035893 | 0,529385                     |      |
| TC0900000494.mm.1 | 3,43                          | PSR0900003231.mm.1 | -2,58 | 0,003883 | 0,359196 Cassette Exon       | 0,08 |
| TC1500000603.mm.1 | 1,65 Kifc2                    | JUC1500002515.mm.1 | 2,58  | 0,012836 | 0,437683                     |      |
| TC1500000603.mm.1 | 1,65 Kifc2                    | JUC1500002509.mm.1 | -2,11 | 0,01168  | 0,429939                     |      |
| TC1500000603.mm.1 | 1,65 Kifc2                    | PSR1500004352.mm.1 | -2,14 | 0,027501 | 0,504313 Cassette Exon       | 0,19 |
| TC1900000913.mm.1 | -1,09 Ssh3                    | PSR1900007953.mm.1 | 2,58  | 0,03812  | 0,535709 Cassette Exon       | 0,19 |
| TC0200004482.mm.1 | 1,26 Trp53bp1                 | JUC0200019497.mm.1 | 2,58  | 0,008038 | 0,40434                      |      |
| TC0200004482.mm.1 | 1,26 Trp53bp1                 | JUC0200019489.mm.1 | 2,34  | 0,00719  | 0,397927                     |      |
| TC0200004482.mm.1 | 1,26 Trp53bp1                 | PSR0200037909.mm.1 | 2,13  | 0,001042 | 0,316361 Cassette Exon       | 0,17 |
| TC0200004482.mm.1 | 1,26 Trp53bp1                 | PSR0200037908.mm.1 | 2,11  | 0,000664 | 0,304044 Cassette Exon       | 0,17 |
| TC0500000214.mm.1 | 1,75 Asic3                    | PSR0500001590.mm.1 | 2,58  | 0,00726  | 0,39826 Cassette Exon        | 0,16 |
| TC0500000214.mm.1 | 1,75 Asic3                    | PSR0500001591.mm.1 | 2,46  | 0,020504 | 0,478221 Cassette Exon       | 0,15 |
| TC0500000214.mm.1 | 1,75 Asic3                    | JUC0500000921.mm.1 | 2,03  | 0,04338  | 0,549544                     |      |
| TC0600002904.mm.1 | 1,44 Srgap3                   | JUC0600011587.mm.1 | 2,58  | 0,040149 | 0,541609                     |      |
| TC0600002904.mm.1 | 1,44 Srgap3                   | PSR0600022303.mm.1 | -2,01 | 0,025522 | 0,497712 Alternative 3' Acce | 0,16 |
| TC0600002904.mm.1 | 1,44 Srgap3                   | JUC0600011589.mm.1 | -2,11 | 0,029569 | 0,510456                     |      |
| TC0600002904.mm.1 | 1,44 Srgap3                   | JUC0600011577.mm.1 | -2,29 | 0,046342 | 0,556272                     |      |
| TC1600001548.mm.1 | 1,48 Pdia5                    | PSR1600012709.mm.1 | 2,58  | 0,014043 | 0,44654 Cassette Exon        | 0,15 |
| TC1600001548.mm.1 | 1,48 Pdia5                    | PSR1600012708.mm.1 | 2,27  | 0,046761 | 0,556925 Cassette Exon       | 0,16 |
| TC1600001548.mm.1 | 1,48 Pdia5                    | PSR1600012707.mm.1 | 2,2   | 0,046943 | 0,557545 Cassette Exon       | 0,13 |
| TC0100003308.mm.1 | 1,84 Lhx4; Pdzrn4             | PSR0100026935.mm.1 | 2,58  | 0,003992 | 0,360753 Cassette Exon       | 0,15 |

|                   |                     |                    |       |          |                              |      |
|-------------------|---------------------|--------------------|-------|----------|------------------------------|------|
| TC0100003308.mm.1 | 1,84 Lhx4; Pdzn4    | PSR0100026943.mm.1 | -2,26 | 0,009961 | 0,418429 Cassette Exon       | 0,12 |
| TC0200004236.mm.1 | -3,99 Gm10799       | PSR0200035651.mm.1 | 2,58  | 0,049981 | 0,564078 Cassette Exon       | 0,15 |
| TC0200004236.mm.1 | -3,99 Gm10799       | PSR0200035652.mm.1 | -2,58 | 0,049981 | 0,564078 Cassette Exon       | 0,15 |
| TC1900000409.mm.1 | -1,26 Smarca2       | PSR1900003764.mm.1 | 2,58  | 0,006094 | 0,386848 Cassette Exon       | 0,12 |
| TC0600000319.mm.1 | 1,52 Lrguk          | PSR0600002328.mm.1 | 2,58  | 0,005724 | 0,382767 Cassette Exon       | 0,1  |
| TC1400002871.mm.1 | 1,07 Gm4285         | JUC1400011434.mm.1 | 2,58  | 0,014546 | 0,449562                     |      |
| TC0200005090.mm.1 | -1,47 Oser1         | JUC0200022388.mm.1 | 2,58  | 0,01434  | 0,448173                     |      |
| TC1800000682.mm.1 | -1,12 Sec11c        | JUC1800002819.mm.1 | 2,58  | 0,014972 | 0,452048                     |      |
| TC1800001541.mm.1 | 1,3 Poli            | JUC1800006294.mm.1 | 2,58  | 0,043388 | 0,549583                     |      |
| TC1800001541.mm.1 | 1,3 Poli            | JUC1800006300.mm.1 | -4,07 | 0,001913 | 0,339584                     |      |
| TC1500001933.mm.1 | 1,14 Polr3h         | JUC1500008609.mm.1 | 2,58  | 0,005334 | 0,378059                     |      |
| TC0500002139.mm.1 | 1,4 Lmbr1           | JUC0500010603.mm.1 | 2,58  | 0,00929  | 0,414799                     |      |
| TC0500000877.mm.1 | -1,72 Stbd1         | JUC0500004179.mm.1 | 2,58  | 0,017536 | 0,464105                     |      |
| TC0600002543.mm.1 | -1,65 Mrpl19        | JUC0600010225.mm.1 | 2,58  | 0,039228 | 0,53882                      |      |
| TC0600003122.mm.1 | 1,08 Leprel2        | JUC0600012662.mm.1 | 2,58  | 0,017215 | 0,462603                     |      |
| TC0300002870.mm.1 | -1,78 Myoz2         | JUC0300011856.mm.1 | 2,58  | 0,000387 | 0,295505                     |      |
| TC0300002636.mm.1 | -1,1 Magi3          | JUC0300010712.mm.1 | 2,58  | 0,020195 | 0,477145                     |      |
| TC1000000555.mm.1 | -1,77 Gm26947       | JUC1000002079.mm.1 | 2,58  | 0,024856 | 0,495511                     |      |
| TC1000000048.mm.1 | -1,07 Lats1         | JUC1000000199.mm.1 | 2,58  | 0,003014 | 0,353447                     |      |
| TC1000001010.mm.1 | 1,23 A230046K03Rik  | JUC1000004053.mm.1 | 2,58  | 0,00194  | 0,340349                     |      |
| TC1000001010.mm.1 | 1,23 A230046K03Rik  | JUC1000004031.mm.1 | -2,02 | 0,034004 | 0,524385                     |      |
| TC0100003832.mm.1 | 3,42 Syt14          | PSR0100031328.mm.1 | 2,57  | 0,007538 | 0,401261 Cassette Exon       | 0,34 |
| TC0100003832.mm.1 | 3,42 Syt14          | JUC0100017774.mm.1 | -2,67 | 0,016837 | 0,4607                       |      |
| TC0100003832.mm.1 | 3,42 Syt14          | JUC0100017780.mm.1 | -2,83 | 0,045106 | 0,553206                     |      |
| TC0100003832.mm.1 | 3,42 Syt14          | PSR0100031331.mm.1 | -3,14 | 0,002134 | 0,343402 Cassette Exon       | 0,24 |
| TC0100003832.mm.1 | 3,42 Syt14          | JUC0100017781.mm.1 | -3,89 | 0,010629 | 0,422841                     |      |
| TC0100003832.mm.1 | 3,42 Syt14          | JUC0100017773.mm.1 | -8,93 | 0,000429 | 0,297771                     |      |
| TC0600002325.mm.1 | -1,39 Crhr2         | PSR0600018188.mm.1 | 2,57  | 0,009434 | 0,416082 Alternative 5' Donc | 0,25 |
| TC0600002325.mm.1 | -1,39 Crhr2         | PSR0600018181.mm.1 | 2,2   | 0,034208 | 0,525106 Alternative 5' Donc | 0,21 |
| TC0600002325.mm.1 | -1,39 Crhr2         | PSR0600018165.mm.1 | -2,18 | 0,013206 | 0,440851 Cassette Exon       | 0,12 |
| TC0900000826.mm.1 | 1,01 Dpp8           | PSR0900006268.mm.1 | 2,57  | 0,023919 | 0,492324 Alternative 5' Donc | 0,25 |
| TC0400002095.mm.1 | -1,46 Mxra8         | PSR0400017489.mm.1 | 2,57  | 0,023526 | 0,490947 Cassette Exon       | 0,23 |
| TC0400002095.mm.1 | -1,46 Mxra8         | JUC0400009180.mm.1 | 2,57  | 0,028349 | 0,506843                     |      |
| TC0100002326.mm.1 | -2,89               | PSR0100018726.mm.1 | 2,57  | 0,034685 | 0,526294 Alternative 3' Acce | 0,22 |
| TC1500000489.mm.1 | 1,22 Wisp1          | PSR1500003504.mm.1 | 2,57  | 0,021514 | 0,482767 Alternative 5' Donc | 0,21 |
| TC1500000489.mm.1 | 1,22 Wisp1          | PSR1500003501.mm.1 | 2,05  | 0,005156 | 0,376575 Cassette Exon       | 0,11 |
| TC1500000489.mm.1 | 1,22 Wisp1          | PSR1500003495.mm.1 | -2,06 | 0,012295 | 0,434277 Cassette Exon       | 0,11 |
| TC0300001909.mm.1 | -1,39 Pgrmc2        | PSR0300014646.mm.1 | 2,57  | 0,009196 | 0,413763 Cassette Exon       | 0,15 |
| TC0300001909.mm.1 | -1,39 Pgrmc2        | PSR0300014643.mm.1 | 2,12  | 0,034298 | 0,525445 Cassette Exon       | 0,19 |
| TC0700003938.mm.1 | -1,89 Trim12a       | PSR0700032899.mm.1 | 2,57  | 0,001236 | 0,322251 Cassette Exon       | 0,19 |
| TC1100002334.mm.1 | 1,11 Ehbp1          | PSR1100022149.mm.1 | 2,57  | 0,026602 | 0,501778 Cassette Exon       | 0,19 |
| TC1100002334.mm.1 | 1,11 Ehbp1          | JUC1100011530.mm.1 | 2,31  | 0,003121 | 0,353892                     |      |
| TC0300000733.mm.1 | -1,32 2810403A07Rik | PSR0300005289.mm.1 | 2,57  | 0,046733 | 0,556856 Alternative 5' Donc | 0,17 |
| TC0900000596.mm.1 | 4,55                | PSR0900004224.mm.1 | 2,57  | 0,002815 | 0,352207 Cassette Exon       | 0,14 |
| TC0900000596.mm.1 | 4,55                | PSR0900004223.mm.1 | -2,57 | 0,002815 | 0,352207 Cassette Exon       | 0,15 |
| TC0200002056.mm.1 | 1,32 Plcb1          | PSR0200016337.mm.1 | 2,57  | 0,018207 | 0,467586 Cassette Exon       | 0,13 |
| TC0200002056.mm.1 | 1,32 Plcb1          | JUC0200008233.mm.1 | 2,31  | 0,005902 | 0,383835                     |      |
| TC0200002056.mm.1 | 1,32 Plcb1          | JUC0200008225.mm.1 | -2,31 | 0,012054 | 0,432426                     |      |

|                   |                     |                     |       |          |                              |      |
|-------------------|---------------------|---------------------|-------|----------|------------------------------|------|
| TC1400001303.mm.1 | -1,5 Mbnl2          | JUC1400005206.mm.1  | 2,57  | 0,000102 | 0,262646                     |      |
| TC1200001715.mm.1 | 1,12 Strn3          | JUC1200006531.mm.1  | 2,57  | 0,010153 | 0,419557                     |      |
| TC1700001989.mm.1 | 1,23 Abcf1          | JUC17000010143.mm.1 | 2,57  | 0,037289 | 0,533573                     |      |
| TC0100002864.mm.1 | 1,01 Ppip5k2        | JUC01000013192.mm.1 | 2,57  | 0,004682 | 0,370323                     |      |
| TC1700001798.mm.1 | 1,17 Btbd9          | JUC1700008936.mm.1  | 2,57  | 0,029544 | 0,510303                     |      |
| TC1500001807.mm.1 | -2,31 Apol7a        | JUC1500008013.mm.1  | 2,57  | 0,009192 | 0,413763                     |      |
| TC0500000357.mm.1 | -1,07 Uvssa         | JUC0500001840.mm.1  | 2,57  | 0,017409 | 0,463768                     |      |
| TC0500000357.mm.1 | -1,07 Uvssa         | JUC0500001855.mm.1  | 2,14  | 0,018264 | 0,46797                      |      |
| TC0500003379.mm.1 | -1,22 Eln           | JUC05000016609.mm.1 | 2,57  | 0,037586 | 0,534053                     |      |
| TC0500003379.mm.1 | -1,22 Eln           | JUC05000016631.mm.1 | -2,1  | 0,04755  | 0,558707                     |      |
| TC0500003379.mm.1 | -1,22 Eln           | JUC05000016634.mm.1 | -2,3  | 0,011161 | 0,426295                     |      |
| TC0500003379.mm.1 | -1,22 Eln           | JUC05000016607.mm.1 | -2,35 | 0,033644 | 0,523479                     |      |
| TC0700001689.mm.1 | 1,98 Xylt1          | JUC0700007251.mm.1  | 2,57  | 0,01996  | 0,476104                     |      |
| TC0700001689.mm.1 | 1,98 Xylt1          | JUC0700007249.mm.1  | -2,05 | 0,039029 | 0,538193                     |      |
| TC0700001689.mm.1 | 1,98 Xylt1          | JUC0700007257.mm.1  | -2,4  | 0,003012 | 0,353447                     |      |
| TC0700001689.mm.1 | 1,98 Xylt1          | JUC0700007252.mm.1  | -2,78 | 0,00333  | 0,354243                     |      |
| TC0400000183.mm.1 | 1,47 Pnlsr; Sfrs18  | JUC0400000581.mm.1  | 2,57  | 0,011163 | 0,426295                     |      |
| TC0400000183.mm.1 | 1,47 Pnlsr; Sfrs18  | JUC0400000593.mm.1  | -2,77 | 0,009315 | 0,414883                     |      |
| TC0400000183.mm.1 | 1,47 Pnlsr; Sfrs18  | JUC0400000596.mm.1  | -3,45 | 0,001061 | 0,316361                     |      |
| TC1100002032.mm.1 | -1,17 Gcgr          | JUC11000010223.mm.1 | 2,57  | 0,020775 | 0,479352                     |      |
| TC0900003246.mm.1 | -1,26 Scn11a        | JUC09000015396.mm.1 | 2,57  | 0,040296 | 0,541823                     |      |
| TC0400003701.mm.1 | -1,52 Gm13257       | JUC04000015794.mm.1 | 2,57  | 0,006456 | 0,390284                     |      |
| TC0900002772.mm.1 | 1,11 lbtk           | JUC09000012833.mm.1 | 2,57  | 0,024501 | 0,493992                     |      |
| TC0900002772.mm.1 | 1,11 lbtk           | JUC09000012841.mm.1 | 2,22  | 0,015605 | 0,455078                     |      |
| TC0600001458.mm.1 | -2,01 Scnn1a        | PSR06000011919.mm.1 | 2,56  | 0,011873 | 0,431125 Alternative 3' Acce | 0,19 |
| TC0600001458.mm.1 | -2,01 Scnn1a        | PSR06000011916.mm.1 | 2,48  | 0,02832  | 0,506741 Alternative 3' Acce | 0,11 |
| TC1800000201.mm.1 | 1,99 Fhod3          | PSR1800001503.mm.1  | 2,56  | 0,021666 | 0,483789 Cassette Exon       | 0,18 |
| TC1800000201.mm.1 | 1,99 Fhod3          | JUC1800000867.mm.1  | 2,47  | 0,01769  | 0,465018                     |      |
| TC1800000201.mm.1 | 1,99 Fhod3          | JUC1800000874.mm.1  | 2,37  | 0,034101 | 0,524833                     |      |
| TC1800000201.mm.1 | 1,99 Fhod3          | PSR1800001497.mm.1  | -2,03 | 0,005543 | 0,380603 Cassette Exon       | 0,19 |
| TC1800000201.mm.1 | 1,99 Fhod3          | PSR1800001500.mm.1  | -2,03 | 0,049673 | 0,563531                     |      |
| TC1800000201.mm.1 | 1,99 Fhod3          | PSR1800001495.mm.1  | -2,14 | 0,000741 | 0,307808 Cassette Exon       | 0,12 |
| TC1800000201.mm.1 | 1,99 Fhod3          | JUC1800000872.mm.1  | -2,2  | 0,046566 | 0,556761                     |      |
| TC1800000201.mm.1 | 1,99 Fhod3          | PSR1800001498.mm.1  | -2,27 | 0,003393 | 0,354841 Cassette Exon       | 0,19 |
| TC1800000201.mm.1 | 1,99 Fhod3          | PSR1800001501.mm.1  | -2,43 | 0,027525 | 0,504313 Cassette Exon       | 0,06 |
| TC1300002549.mm.1 | -2,73 4922502H24Rik | PSR13000017389.mm.1 | 2,56  | 0,020731 | 0,479166 Cassette Exon       | 0,16 |
| TC0900000254.mm.1 | -1 Thyn1            | PSR0900001890.mm.1  | 2,56  | 0,036595 | 0,531454 Cassette Exon       | 0,15 |
| TC0X00003432.mm.1 | 1,72 Mecp2          | PSR0X000015436.mm.1 | 2,56  | 0,004389 | 0,366156 Cassette Exon       | 0,15 |
| TC0X00003432.mm.1 | 1,72 Mecp2          | PSR0X000015450.mm.1 | -2,01 | 0,042589 | 0,548047 Alternative 5' Donc | 0,04 |
| TC0X00003432.mm.1 | 1,72 Mecp2          | JUC0X00007871.mm.1  | -3,05 | 0,010737 | 0,423772                     |      |
| TC1400001674.mm.1 | -1,08 Dnah1         | PSR14000012903.mm.1 | 2,56  | 0,031854 | 0,517902 Cassette Exon       | 0,14 |
| TC1400001674.mm.1 | -1,08 Dnah1         | JUC1400007062.mm.1  | 2,01  | 0,03787  | 0,534873                     |      |
| TC1400001674.mm.1 | -1,08 Dnah1         | JUC1400007005.mm.1  | -3,52 | 0,043992 | 0,550776                     |      |
| TC0800002683.mm.1 | 1,05 Rpgrip1l       | JUC08000011164.mm.1 | 2,56  | 0,008927 | 0,410972                     |      |
| TC0800002683.mm.1 | 1,05 Rpgrip1l       | JUC08000011143.mm.1 | 2,49  | 0,01414  | 0,447464                     |      |
| TC0800002683.mm.1 | 1,05 Rpgrip1l       | PSR08000020544.mm.1 | -2,27 | 0,040149 | 0,541609 Cassette Exon       | 0,12 |
| TC0800002683.mm.1 | 1,05 Rpgrip1l       | JUC08000011166.mm.1 | -2,63 | 0,026065 | 0,499627                     |      |
| TC0200003303.mm.1 | -1,08 Lcn2          | PSR02000028090.mm.1 | 2,56  | 0,008912 | 0,410728 Alternative 5' Donc | 0,05 |



|                   |                             |                    |       |          |                              |      |
|-------------------|-----------------------------|--------------------|-------|----------|------------------------------|------|
| TC0300001070.mm.1 | 1,15 Phtf1                  | JUC0300004490.mm.1 | 2,56  | 0,040091 | 0,541412                     |      |
| TC0300001070.mm.1 | 1,15 Phtf1                  | JUC0300004496.mm.1 | 2,25  | 0,01513  | 0,452674                     |      |
| TC1200002579.mm.1 | -1,77 lghv11-1              | JUC1200009972.mm.1 | 2,56  | 0,000589 | 0,304044                     |      |
| TC0200004737.mm.1 | -1 Kif16b                   | JUC0200021022.mm.1 | 2,56  | 0,03176  | 0,517489                     |      |
| TC0200001158.mm.1 | 1,17 Itga4                  | JUC0200004749.mm.1 | 2,56  | 0,015724 | 0,455416                     |      |
| TC0700000543.mm.1 | -1,33                       | JUC0700002333.mm.1 | 2,56  | 0,03032  | 0,51274                      |      |
| TC0600002741.mm.1 | -1,2 Mrps25                 | JUC0600011062.mm.1 | 2,56  | 0,041338 | 0,544348                     |      |
| TC1000002846.mm.1 | -1,27 Nav3                  | JUC1000011861.mm.1 | 2,56  | 0,010299 | 0,420394                     |      |
| TC1000002846.mm.1 | -1,27 Nav3                  | JUC1000011865.mm.1 | 2,15  | 0,026529 | 0,501411                     |      |
| TC1000002846.mm.1 | -1,27 Nav3                  | JUC1000011895.mm.1 | -3,22 | 0,000743 | 0,307808                     |      |
| TC1100001969.mm.1 | -1,48 Tmc8                  | JUC1100009744.mm.1 | 2,56  | 0,046166 | 0,555838                     |      |
| TC0400001449.mm.1 | -1,5 Csf3r                  | JUC0400005731.mm.1 | 2,56  | 0,001882 | 0,338712                     |      |
| TC1700000676.mm.1 | 2,31 Atp6v1g2               | PSR1700006894.mm.1 | 2,55  | 0,028985 | 0,508806                     |      |
| TC1700000676.mm.1 | 2,31 Atp6v1g2               | PSR1700006876.mm.1 | -2,28 | 0,032953 | 0,52122 Cassette Exon        | 0,17 |
| TC1700000676.mm.1 | 2,31 Atp6v1g2               | PSR1700006884.mm.1 | -2,55 | 0,015146 | 0,452699 Cassette Exon       | 0,16 |
| TC1700000676.mm.1 | 2,31 Atp6v1g2               | PSR1700006881.mm.1 | -3,14 | 0,035666 | 0,528966 Cassette Exon       | 0,36 |
| TC1700000676.mm.1 | 2,31 Atp6v1g2               | PSR1700006880.mm.1 | -3,16 | 0,002757 | 0,350151 Intron Retention    | 0,19 |
| TC1700000676.mm.1 | 2,31 Atp6v1g2               | PSR1700006886.mm.1 | -3,29 | 0,000525 | 0,304044 Alternative 3' Acce | 0,22 |
| TC1700000676.mm.1 | 2,31 Atp6v1g2               | PSR1700006877.mm.1 | -3,31 | 0,012283 | 0,434168 Cassette Exon       | 0,21 |
| TC1700000676.mm.1 | 2,31 Atp6v1g2               | JUC1700003782.mm.1 | -4,46 | 0,002139 | 0,343541                     |      |
| TC0300002071.mm.1 | 1,58 Plch1                  | JUC0300008200.mm.1 | 2,55  | 0,024834 | 0,495411                     |      |
| TC0300002071.mm.1 | 1,58 Plch1                  | PSR0300015655.mm.1 | -2,07 | 0,006191 | 0,387873 Alternative 5' Donc | 0,09 |
| TC0300002071.mm.1 | 1,58 Plch1                  | PSR0300015661.mm.1 | -2,25 | 0,024284 | 0,493611 Alternative 5' Donc | 0,15 |
| TC0300002071.mm.1 | 1,58 Plch1                  | PSR0300015623.mm.1 | -2,43 | 0,017676 | 0,464879 Alternative 5' Donc | 0,17 |
| TC0300002071.mm.1 | 1,58 Plch1                  | JUC0300008191.mm.1 | -2,45 | 0,00452  | 0,368648                     |      |
| TC0300002071.mm.1 | 1,58 Plch1                  | PSR0300015657.mm.1 | -3,05 | 0,046302 | 0,556186 Alternative 3' Acce | 0,28 |
| TC0300002071.mm.1 | 1,58 Plch1                  | JUC0300008217.mm.1 | -3,36 | 0,003845 | 0,358723                     |      |
| TC1200002021.mm.1 | -1,75                       | PSR1200013935.mm.1 | 2,55  | 0,001788 | 0,336311 Alternative 3' Acce | 0,24 |
| TC0200000914.mm.1 | 1,61 Gm13583                | PSR0200007325.mm.1 | 2,55  | 0,036888 | 0,532257 Alternative 5' Donc | 0,2  |
| TC0400004139.mm.1 | 1,8 Prkcz                   | JUC0400018069.mm.1 | 2,55  | 0,015998 | 0,45702                      |      |
| TC0400004139.mm.1 | 1,8 Prkcz                   | PSR0400034663.mm.1 | -2,02 | 0,022023 | 0,485237 Alternative 5' Donc | 0,2  |
| TC0400004139.mm.1 | 1,8 Prkcz                   | PSR0400034681.mm.1 | -2,04 | 0,009061 | 0,412827 Cassette Exon       | 0,12 |
| TC0400004139.mm.1 | 1,8 Prkcz                   | PSR0400034684.mm.1 | -2,1  | 0,001558 | 0,331094 Cassette Exon       | 0,12 |
| TC0400004139.mm.1 | 1,8 Prkcz                   | PSR0400034678.mm.1 | -2,42 | 0,028934 | 0,508625 Intron Retention    | 0,2  |
| TC0400004139.mm.1 | 1,8 Prkcz                   | PSR0400034666.mm.1 | -2,77 | 0,002962 | 0,352501 Cassette Exon       | 0,15 |
| TC0100000610.mm.1 | -2,52 Igfbp2                | PSR0100004913.mm.1 | 2,55  | 0,00715  | 0,39769 Cassette Exon        | 0,16 |
| TC0100000610.mm.1 | -2,52 Igfbp2                | PSR0100004914.mm.1 | 2,09  | 0,026076 | 0,499646 Alternative 3' Acce | 0,15 |
| TC0900001845.mm.1 | 1,28 Olfm2                  | PSR0900015399.mm.1 | 2,55  | 0,005758 | 0,383101 Cassette Exon       | 0,16 |
| TC0900001656.mm.1 | -1,78 Exosc7                | PSR0900013932.mm.1 | 2,55  | 0,040503 | 0,542217 Cassette Exon       | 0,12 |
| TC0900001656.mm.1 | -1,78 Exosc7                | PSR0900013939.mm.1 | 2,3   | 0,040364 | 0,541959 Cassette Exon       | 0,15 |
| TC0900001656.mm.1 | -1,78 Exosc7                | PSR0900013929.mm.1 | 2,25  | 0,045752 | 0,554863 Cassette Exon       | 0,13 |
| TC0600001848.mm.1 | 1,51 A430035B10Rik; LOC1008 | PSR0600014589.mm.1 | 2,55  | 0,040757 | 0,543082 Cassette Exon       | 0,14 |
| TC0700000558.mm.1 | 1,42 Alkbh6; Gm24757        | PSR0700004793.mm.1 | 2,55  | 0,017963 | 0,466771 Cassette Exon       | 0,13 |
| TC1400002867.mm.1 | -1,08 Xpo4                  | JUC1400009018.mm.1 | 2,55  | 0,005804 | 0,383104                     |      |
| TC1100003921.mm.1 | -1,13 Scn4a                 | JUC1100019211.mm.1 | 2,55  | 0,002219 | 0,345773                     |      |
| TC0300000979.mm.1 | -1,06 Hmgcs2                | JUC0300004092.mm.1 | 2,55  | 0,010812 | 0,424055                     |      |
| TC1300001938.mm.1 | -1,04 A330048O09Rik         | JUC1300006206.mm.1 | 2,55  | 0,008159 | 0,40551                      |      |
| TC0100002242.mm.1 | -1,16 Rfx8                  | JUC0100010238.mm.1 | 2,55  | 0,029416 | 0,509995                     |      |

|                   |                            |                    |       |          |          |                          |
|-------------------|----------------------------|--------------------|-------|----------|----------|--------------------------|
| TC0100002242.mm.1 | -1,16 Rfx8                 | JUC0100010242.mm.1 | -2,01 | 0,047513 | 0,558686 |                          |
| TC1700001428.mm.1 | -2,18 Qk                   | JUC1700006957.mm.1 | 2,55  | 0,02069  | 0,478999 |                          |
| TC1900001213.mm.1 | -1,23 Vps13a               | JUC1900006027.mm.1 | 2,55  | 0,011885 | 0,431306 |                          |
| TC1900001516.mm.1 | 1,19 Mms19                 | JUC1900007400.mm.1 | 2,55  | 0,021799 | 0,484444 |                          |
| TC0100000771.mm.1 | -1,34 Cab39                | JUC0100003688.mm.1 | 2,55  | 0,000591 | 0,304044 |                          |
| TC0200001369.mm.1 | -1,12 Mybpc3               | JUC0200005290.mm.1 | 2,55  | 0,00165  | 0,333988 |                          |
| TC0200001380.mm.1 | 1,01 Arhgap1               | JUC0200005481.mm.1 | 2,55  | 0,023307 | 0,49004  |                          |
| TC1600000680.mm.1 | 1,02 Gm15591               | JUC1600003126.mm.1 | 2,55  | 0,018429 | 0,468623 |                          |
| TC0700002982.mm.1 | 1 Scaf1                    | JUC0700014306.mm.1 | 2,55  | 0,018016 | 0,466939 |                          |
| TC0500003658.mm.1 | -1,33 Gm15997              | JUC0500018235.mm.1 | 2,55  | 0,031475 | 0,516922 |                          |
| TC0700001991.mm.1 | 1,05 Inpp5a                | JUC0700009266.mm.1 | 2,55  | 0,003257 | 0,354243 |                          |
| TC0700001991.mm.1 | 1,05 Inpp5a                | JUC0700009280.mm.1 | -2,45 | 0,005171 | 0,376797 |                          |
| TC1000003160.mm.1 | 1,01 Cdk2                  | JUC1000013109.mm.1 | 2,55  | 0,007447 | 0,40013  |                          |
| TC0900002389.mm.1 | -1,42 Pml                  | JUC0900011328.mm.1 | 2,55  | 0,016372 | 0,458693 |                          |
| TC0400000849.mm.1 | 1,57 Cntlh                 | PSR0400005773.mm.1 | 2,54  | 0,012075 | 0,43255  | Cassette Exon 0,24       |
| TC0400000849.mm.1 | 1,57 Cntlh                 | JUC0400002943.mm.1 | 2,06  | 0,031682 | 0,517423 |                          |
| TC0700003075.mm.1 | -1,73 E2f8                 | PSR0700028050.mm.1 | 2,54  | 0,048129 | 0,559938 | Cassette Exon 0,15       |
| TC1000001687.mm.1 | -1,03 Mtrf1l               | JUC1000006672.mm.1 | 2,54  | 0,029543 | 0,510303 |                          |
| TC1000001687.mm.1 | -1,03 Mtrf1l               | PSR1000012300.mm.1 | 2,26  | 0,022189 | 0,485756 | Alternative 5' Donc 0,15 |
| TC1000002373.mm.1 | -1,14                      | PSR1000016907.mm.1 | 2,54  | 0,009987 | 0,418456 | Cassette Exon 0,14       |
| TC0200004201.mm.1 | -1,31 Rag1; B230118H07Rik  | JUC0200018015.mm.1 | 2,54  | 0,004794 | 0,371408 |                          |
| TC0200004201.mm.1 | -1,31 Rag1; B230118H07Rik  | PSR0200035265.mm.1 | 2,32  | 0,006458 | 0,390284 | Cassette Exon 0,1        |
| TC0200004201.mm.1 | -1,31 Rag1; B230118H07Rik  | PSR0200035264.mm.1 | 2,11  | 0,004784 | 0,371208 | Cassette Exon 0,13       |
| TC0200004201.mm.1 | -1,31 Rag1; B230118H07Rik  | PSR0200035239.mm.1 | 2,1   | 0,01554  | 0,454617 | Alternative 3' Acce 0,11 |
| TC1100001208.mm.1 | 1,29 Cdk5r1                | PSR1100011374.mm.1 | 2,54  | 0,00404  | 0,361702 | Alternative 5' Donc 0,07 |
| TC0900000776.mm.1 | -1,51 Tle3                 | PSR0900005794.mm.1 | 2,54  | 0,040745 | 0,543028 | Cassette Exon 0,06       |
| TC0200004646.mm.1 | -1 Adam33                  | JUC0200020666.mm.1 | 2,54  | 0,002693 | 0,349612 |                          |
| TC1700002553.mm.1 | -1,28 Strn                 | JUC1700012523.mm.1 | 2,54  | 0,019265 | 0,473074 |                          |
| TC0100003202.mm.1 | -1,04 Cdc73                | JUC0100014797.mm.1 | 2,54  | 0,033648 | 0,523479 |                          |
| TC1700001987.mm.1 | -1,36 Mrps18b              | JUC1700010123.mm.1 | 2,54  | 0,012028 | 0,432286 |                          |
| TC1900000990.mm.1 | 1,2 Dpf2                   | JUC1900004955.mm.1 | 2,54  | 0,025566 | 0,497808 |                          |
| TC1900000990.mm.1 | 1,2 Dpf2                   | JUC1900004946.mm.1 | -2,1  | 0,007871 | 0,403545 |                          |
| TC0100001787.mm.1 | 1,16 Eprs                  | JUC0100008451.mm.1 | 2,54  | 0,018322 | 0,468127 |                          |
| TC0100001787.mm.1 | 1,16 Eprs                  | JUC0100008466.mm.1 | -2,05 | 0,001956 | 0,340561 |                          |
| TC1500001789.mm.1 | -1,06 Recql4               | JUC1500007920.mm.1 | 2,54  | 0,040991 | 0,543571 |                          |
| TC1500001789.mm.1 | -1,06 Recql4               | JUC1500007918.mm.1 | 2,04  | 0,017509 | 0,463964 |                          |
| TC1500001790.mm.1 | 1,18 C030006K11Rik; Lrrc24 | JUC1500007941.mm.1 | 2,54  | 0,011444 | 0,427741 |                          |
| TC1500001790.mm.1 | 1,18 C030006K11Rik; Lrrc24 | JUC1500007940.mm.1 | 2,38  | 0,017794 | 0,465621 |                          |
| TC1500001790.mm.1 | 1,18 C030006K11Rik; Lrrc24 | JUC1500007939.mm.1 | 2,17  | 0,049597 | 0,563406 |                          |
| TC0500001229.mm.1 | 1,16                       | JUC0500005780.mm.1 | 2,54  | 0,006162 | 0,387873 |                          |
| TC0600001813.mm.1 | -1,47 Slc25a13             | JUC0600007522.mm.1 | 2,54  | 0,018165 | 0,467441 |                          |
| TC0600001931.mm.1 | 1,17 Cadps2                | JUC0600007916.mm.1 | 2,54  | 0,012327 | 0,434392 |                          |
| TC0600001931.mm.1 | 1,17 Cadps2                | JUC0600007921.mm.1 | -2,06 | 0,01467  | 0,450098 |                          |
| TC0600001931.mm.1 | 1,17 Cadps2                | JUC0600007915.mm.1 | -2,28 | 0,046599 | 0,55677  |                          |
| TC0600001931.mm.1 | 1,17 Cadps2                | JUC0600007952.mm.1 | -3,05 | 0,028418 | 0,507154 |                          |
| TC0600001931.mm.1 | 1,17 Cadps2                | JUC0600007956.mm.1 | -3,2  | 0,001971 | 0,340622 |                          |
| TC1100001520.mm.1 | -2,09 Copz2                | JUC1100007274.mm.1 | 2,54  | 0,009719 | 0,417826 |                          |
| TC0500001103.mm.1 | 14,39 Pde6b                | JUC0500005113.mm.1 | 2,53  | 0,020081 | 0,476581 |                          |

|                   |               |                    |        |          |                              |      |
|-------------------|---------------|--------------------|--------|----------|------------------------------|------|
| TC0500001103.mm.1 | 14,39 Pde6b   | JUC0500005122.mm.1 | 2,38   | 0,005276 | 0,378059                     |      |
| TC0500001103.mm.1 | 14,39 Pde6b   | PSR0500009393.mm.1 | -2,01  | 0,01206  | 0,432426 Intron Retention    | 0,23 |
| TC0500001103.mm.1 | 14,39 Pde6b   | PSR0500009382.mm.1 | -2,02  | 0,000884 | 0,312542 Cassette Exon       | 0,09 |
| TC0500001103.mm.1 | 14,39 Pde6b   | PSR0500009388.mm.1 | -2,36  | 0,030054 | 0,511847 Intron Retention    | 0,31 |
| TC0500001103.mm.1 | 14,39 Pde6b   | PSR0500009407.mm.1 | -2,92  | 0,016926 | 0,460872 Cassette Exon       | 0,22 |
| TC0500001103.mm.1 | 14,39 Pde6b   | PSR0500009406.mm.1 | -3,23  | 0,005603 | 0,381115 Cassette Exon       | 0,22 |
| TC0500001103.mm.1 | 14,39 Pde6b   | PSR0500009405.mm.1 | -3,32  | 0,023747 | 0,491646 Cassette Exon       | 0,22 |
| TC0500001103.mm.1 | 14,39 Pde6b   | PSR0500009399.mm.1 | -3,33  | 0,021671 | 0,483837 Intron Retention    | 0,47 |
| TC0500001103.mm.1 | 14,39 Pde6b   | JUC0500005121.mm.1 | -3,37  | 0,040417 | 0,541998                     |      |
| TC0500001103.mm.1 | 14,39 Pde6b   | PSR0500009397.mm.1 | -3,97  | 0,008821 | 0,410155 Intron Retention    | 0,74 |
| TC0500001103.mm.1 | 14,39 Pde6b   | PSR0500009409.mm.1 | -5,98  | 0,003306 | 0,354243 Cassette Exon       | 0,22 |
| TC0500001103.mm.1 | 14,39 Pde6b   | JUC0500005120.mm.1 | -10,54 | 0,001867 | 0,337974                     |      |
| TC0500001103.mm.1 | 14,39 Pde6b   | PSR0500009376.mm.1 | -17,99 | 0,001697 | 0,335395 Alternative 3' Acce | 0,47 |
| TC0500001103.mm.1 | 14,39 Pde6b   | JUC0500005109.mm.1 | -22,9  | 0,000074 | 0,251428                     |      |
| TC0500001103.mm.1 | 14,39 Pde6b   | JUC0500005123.mm.1 | -23,48 | 0,003092 | 0,353892                     |      |
| TC1400000913.mm.1 | 5,43 Rp11     | PSR1400007301.mm.1 | 2,53   | 0,001228 | 0,322251 Cassette Exon       | 0,11 |
| TC1400000913.mm.1 | 5,43 Rp11     | JUC1400003920.mm.1 | -5,09  | 0,018036 | 0,467135                     |      |
| TC1400000913.mm.1 | 5,43 Rp11     | PSR1400007300.mm.1 | -5,54  | 0,001822 | 0,336896 Alternative 3' Acce | 0,48 |
| TC1100001407.mm.1 | 4,56 Car10    | PSR1100013135.mm.1 | 2,53   | 0,008804 | 0,409934 Cassette Exon       | 0,01 |
| TC1100001407.mm.1 | 4,56 Car10    | JUC1100006887.mm.1 | 2,21   | 0,025207 | 0,49668                      |      |
| TC1100001407.mm.1 | 4,56 Car10    | PSR1100013133.mm.1 | 2,04   | 0,004053 | 0,361816 Cassette Exon       | 0,16 |
| TC1100001407.mm.1 | 4,56 Car10    | PSR1100013138.mm.1 | -2,11  | 0,000101 | 0,262646 Cassette Exon       | 0,17 |
| TC1100001407.mm.1 | 4,56 Car10    | JUC1100006896.mm.1 | -2,25  | 0,019644 | 0,474876                     |      |
| TC1100001407.mm.1 | 4,56 Car10    | PSR1100013142.mm.1 | -2,28  | 0,008316 | 0,406313 Cassette Exon       | 0,1  |
| TC1100001407.mm.1 | 4,56 Car10    | PSR1100013145.mm.1 | -2,3   | 0,000219 | 0,28803 Cassette Exon        | 0,18 |
| TC1100001407.mm.1 | 4,56 Car10    | PSR1100013148.mm.1 | -2,36  | 0,023678 | 0,491379 Cassette Exon       | 0,18 |
| TC1100001407.mm.1 | 4,56 Car10    | JUC1100006895.mm.1 | -2,51  | 0,029164 | 0,509333                     |      |
| TC1100001407.mm.1 | 4,56 Car10    | PSR1100013127.mm.1 | -2,55  | 0,01895  | 0,471398 Cassette Exon       | 0,2  |
| TC1100001407.mm.1 | 4,56 Car10    | PSR1100013143.mm.1 | -2,55  | 0,000261 | 0,28803 Cassette Exon        | 0,15 |
| TC1100001407.mm.1 | 4,56 Car10    | PSR1100013144.mm.1 | -2,64  | 0,00884  | 0,410293 Cassette Exon       | 0,28 |
| TC1100001407.mm.1 | 4,56 Car10    | PSR1100013134.mm.1 | -3     | 0,023133 | 0,489756 Alternative 5' Donc | 0,33 |
| TC1100001407.mm.1 | 4,56 Car10    | PSR1100013137.mm.1 | -3,06  | 0,00452  | 0,368648 Cassette Exon       | 0,26 |
| TC1100001407.mm.1 | 4,56 Car10    | JUC1100013140.mm.1 | -3,81  | 0,008655 | 0,408463 Alternative 5' Donc | 0,34 |
| TC1100001407.mm.1 | 4,56 Car10    | PSR1600006890.mm.1 | -4,89  | 0,009786 | 0,417839                     |      |
| TC1100001407.mm.1 | 4,56 Car10    | JUC1100006889.mm.1 | -5,77  | 0,003457 | 0,355628                     |      |
| TC1100001407.mm.1 | 4,56 Car10    | PSR1100013124.mm.1 | -6,53  | 0,001258 | 0,322251 Cassette Exon       | 0,33 |
| TC1100003193.mm.1 | 1,3 Rap1gap2  | JUC1100015383.mm.1 | 2,53   | 0,048185 | 0,560088                     |      |
| TC1100003193.mm.1 | 1,3 Rap1gap2  | PSR1100029435.mm.1 | -2,26  | 0,038066 | 0,535633 Cassette Exon       | 0,1  |
| TC1100003193.mm.1 | 1,3 Rap1gap2  | PSR1100029429.mm.1 | -2,71  | 0,039844 | 0,540922 Alternative 5' Donc | 0,32 |
| TC1600000772.mm.1 | -1,68 Mina    | PSR1600006697.mm.1 | 2,53   | 0,011147 | 0,426226 Alternative 5' Donc | 0,26 |
| TC1600000772.mm.1 | -1,68 Mina    | JUC1600003561.mm.1 | -12,06 | 0,009927 | 0,418378                     |      |
| TC1700000418.mm.1 | -2,02 Atp6v0e | PSR1700003566.mm.1 | 2,53   | 0,017824 | 0,465913 Alternative 5' Donc | 0,26 |
| TC0300001797.mm.1 | -1,53 Zmat3   | PSR0300013928.mm.1 | 2,53   | 0,009018 | 0,412541 Alternative 3' Acce | 0,24 |
| TC0400002549.mm.1 | -1,38 Gne     | PSR0400020812.mm.1 | 2,53   | 0,044106 | 0,550916 Alternative 3' Acce | 0,24 |
| TC1400002032.mm.1 | 1,69 Mett13   | PSR1400015325.mm.1 | 2,53   | 0,048613 | 0,561169 Alternative 5' Donc | 0,24 |
| TC1200000988.mm.1 | -1,12 Tdp1    | PSR1200006884.mm.1 | 2,53   | 0,044443 | 0,551619 Alternative 3' Acce | 0,21 |
| TC0400000018.mm.1 | -1,03 Chchd7  | PSR0400000154.mm.1 | 2,53   | 0,014595 | 0,449914 Cassette Exon       | 0,12 |
| TC0400000018.mm.1 | -1,03 Chchd7  | PSR0400000137.mm.1 | 2,2    | 0,047858 | 0,559373 Alternative 5' Donc | 0,18 |

|                   |                               |                     |       |          |          |                     |      |
|-------------------|-------------------------------|---------------------|-------|----------|----------|---------------------|------|
| TC0500001914.mm.1 | -1,35 Steap1                  | PSR0500017668.mm.1  | 2,53  | 0,046459 | 0,556553 | Cassette Exon       | 0,14 |
| TC1000002154.mm.1 | -1,03 Ros1                    | PSR1000015109.mm.1  | 2,53  | 0,0269   | 0,502518 | Cassette Exon       | 0,13 |
| TC1400001036.mm.1 | -1,14 Suda2                   | JUC1400004454.mm.1  | 2,53  | 0,037622 | 0,534172 |                     |      |
| TC1200001420.mm.1 | -1,42 Gen1                    | JUC1200005527.mm.1  | 2,53  | 0,029638 | 0,510607 |                     |      |
| TC0300000763.mm.1 | -1,16 Shc1                    | JUC0300003047.mm.1  | 2,53  | 0,010035 | 0,41878  |                     |      |
| TC1500001044.mm.1 | -1,13 Higd1c; Mettl7a2Higd1c; | JUC1500004676.mm.1  | 2,53  | 0,024546 | 0,494088 |                     |      |
| TC0800001797.mm.1 | -1,34 Angpt2                  | JUC0800007829.mm.1  | 2,53  | 0,02123  | 0,481319 |                     |      |
| TC0800000091.mm.1 | 1,14 Ing1                     | JUC0800000436.mm.1  | 2,53  | 0,009874 | 0,417993 |                     |      |
| TC0500000607.mm.1 | 1,36 Wdr19                    | JUC0500003009.mm.1  | 2,53  | 0,014487 | 0,449376 |                     |      |
| TC0500000607.mm.1 | 1,36 Wdr19                    | JUC0500003005.mm.1  | 2,06  | 0,036313 | 0,530532 |                     |      |
| TC1000002464.mm.1 | 1,07 2610008E11Rik            | JUC1000009872.mm.1  | 2,53  | 0,049705 | 0,563531 |                     |      |
| TC1100003035.mm.1 | -1,09 Cntrob                  | JUC1100014424.mm.1  | 2,53  | 0,008595 | 0,408294 |                     |      |
| TC1100003035.mm.1 | -1,09 Cntrob                  | JUC1100014427.mm.1  | 2,03  | 0,005645 | 0,381706 |                     |      |
| TC1100001580.mm.1 | 1,09 Thra                     | JUC1100007649.mm.1  | 2,53  | 0,023954 | 0,4926   |                     |      |
| TC1100001580.mm.1 | 1,09 Thra                     | JUC1100007638.mm.1  | 2,28  | 0,013026 | 0,439354 |                     |      |
| TC1100002225.mm.1 | -1,55 Ddc                     | JUC1100011279.mm.1  | 2,53  | 0,034154 | 0,524919 |                     |      |
| TC0400003440.mm.1 | 1,01 Nfyc                     | JUC0400014576.mm.1  | 2,53  | 0,018016 | 0,466939 |                     |      |
| TC0500000299.mm.1 | 1,84 Dpysl5                   | PSR0500002359.mm.1  | 2,52  | 0,000055 | 0,24627  | Alternative 3' Acce | 0,13 |
| TC0500000299.mm.1 | 1,84 Dpysl5                   | PSR0500002354.mm.1  | -2,27 | 0,028676 | 0,508017 | Cassette Exon       | 0,12 |
| TC0500000299.mm.1 | 1,84 Dpysl5                   | JUC0500001301.mm.1  | -2,3  | 0,001466 | 0,329023 |                     |      |
| TC0500000299.mm.1 | 1,84 Dpysl5                   | PSR0500002357.mm.1  | -2,4  | 0,004121 | 0,3623   | Cassette Exon       | 0,04 |
| TC0500000299.mm.1 | 1,84 Dpysl5                   | PSR0500002356.mm.1  | -2,61 | 0,000222 | 0,28803  | Cassette Exon       | 0,21 |
| TC0500000299.mm.1 | 1,84 Dpysl5                   | PSR0500002355.mm.1  | -2,64 | 0,021691 | 0,484029 | Alternative 5' Donc | 0,06 |
| TC0500000299.mm.1 | 1,84 Dpysl5                   | PSR0500002368.mm.1  | -3,51 | 0,016237 | 0,458312 | Alternative 3' Acce | 0,35 |
| TC0700004243.mm.1 | -2,24 Gm27040; Gm26974        | PSR07000035341.mm.1 | 2,52  | 0,019163 | 0,472719 | Cassette Exon       | 0,14 |
| TC0700004243.mm.1 | -2,24 Gm27040; Gm26974        | PSR07000035321.mm.1 | 2,47  | 0,007932 | 0,403819 |                     |      |
| TC0700004243.mm.1 | -2,24 Gm27040; Gm26974        | PSR07000035322.mm.1 | 2,32  | 0,008772 | 0,40982  |                     |      |
| TC0700004243.mm.1 | -2,24 Gm27040; Gm26974        | PSR07000035335.mm.1 | 2,22  | 0,009087 | 0,412827 | Intron Retention    | 0,23 |
| TC0700004243.mm.1 | -2,24 Gm27040; Gm26974        | JUC0700018640.mm.1  | 2,03  | 0,039778 | 0,540568 |                     |      |
| TC0100003645.mm.1 | 1,81 Hnrnpu; Gm16586; AI503;  | JUC0100016960.mm.1  | 2,52  | 0,038299 | 0,536106 |                     |      |
| TC0100003645.mm.1 | 1,81 Hnrnpu; Gm16586; AI503;  | PSR0100029858.mm.1  | 2,09  | 0,023034 | 0,489272 | Cassette Exon       | 0,19 |
| TC0100003645.mm.1 | 1,81 Hnrnpu; Gm16586; AI503;  | PSR0100029862.mm.1  | 2,07  | 0,024994 | 0,49605  | Cassette Exon       | 0,17 |
| TC0500003296.mm.1 | 1,24 Rimbp2                   | JUC0500016250.mm.1  | 2,52  | 0,029927 | 0,511499 |                     |      |
| TC0500003296.mm.1 | 1,24 Rimbp2                   | PSR0500029806.mm.1  | 2,37  | 0,012779 | 0,437233 | Cassette Exon       | 0,17 |
| TC0500003296.mm.1 | 1,24 Rimbp2                   | PSR0500029805.mm.1  | 2,3   | 0,021436 | 0,482126 | Cassette Exon       | 0,17 |
| TC0500003296.mm.1 | 1,24 Rimbp2                   | JUC0500016237.mm.1  | 2,16  | 0,017035 | 0,461729 |                     |      |
| TC0500003296.mm.1 | 1,24 Rimbp2                   | JUC0500016251.mm.1  | -2,24 | 0,009484 | 0,416578 |                     |      |
| TC0500002586.mm.1 | 1,25 Fryl                     | PSR0500022961.mm.1  | 2,52  | 0,048215 | 0,560209 | Cassette Exon       | 0,15 |
| TC0500002586.mm.1 | 1,25 Fryl                     | JUC0500012487.mm.1  | -2,99 | 0,01975  | 0,474932 |                     |      |
| TC1800001620.mm.1 | 1,52 Katnal2                  | PSR1800011659.mm.1  | 2,52  | 0,040035 | 0,54131  | Cassette Exon       | 0,14 |
| TC1800001620.mm.1 | 1,52 Katnal2                  | JUC1800006484.mm.1  | -2,18 | 0,014867 | 0,451641 |                     |      |
| TC1600001722.mm.1 | -1,91 Alcam                   | PSR1600014013.mm.1  | 2,52  | 0,031017 | 0,514914 | Alternative 5' Donc | 0,13 |
| TC0200003188.mm.1 | 1,11 Snapc4                   | JUC0200013454.mm.1  | 2,52  | 0,047381 | 0,558302 |                     |      |
| TC0200003188.mm.1 | 1,11 Snapc4                   | JUC0200013447.mm.1  | -2,81 | 0,018479 | 0,468729 |                     |      |
| TC1200000856.mm.1 | 1,21 Vash1                    | JUC1200003535.mm.1  | 2,52  | 0,001053 | 0,316361 |                     |      |
| TC1200000856.mm.1 | 1,21 Vash1                    | JUC1200003538.mm.1  | -2,01 | 0,019086 | 0,472208 |                     |      |
| TC1200001885.mm.1 | -1,13 Pygl                    | JUC1200007180.mm.1  | 2,52  | 0,013538 | 0,44358  |                     |      |
| TC1200001885.mm.1 | -1,13 Pygl                    | JUC1200007171.mm.1  | 2,22  | 0,046668 | 0,556812 |                     |      |

|                   |                     |                    |        |          |                              |      |
|-------------------|---------------------|--------------------|--------|----------|------------------------------|------|
| TC0200005218.mm.1 | -1,91 Nfatc2        | JUC0200023025.mm.1 | 2,52   | 0,042242 | 0,547034                     |      |
| TC1900001766.mm.1 | -1,02 Zfp1          | JUC1900005053.mm.1 | 2,52   | 0,045797 | 0,554863                     |      |
| TC1900001053.mm.1 | -1,13 Slc22a19      | JUC1900005361.mm.1 | 2,52   | 0,011278 | 0,426842                     |      |
| TC0900000625.mm.1 | -1,13 4933407I05Rik | JUC0900002352.mm.1 | 2,52   | 0,015439 | 0,454266                     |      |
| TC0900000625.mm.1 | -1,13 4933407I05Rik | JUC0900002347.mm.1 | 2,04   | 0,027938 | 0,505612                     |      |
| TC0500000836.mm.1 | -1,22 Afm           | JUC0500004029.mm.1 | 2,52   | 0,015771 | 0,455535                     |      |
| TC0700000382.mm.1 | -1,17 Smg9          | JUC0700001339.mm.1 | 2,52   | 0,017461 | 0,463886                     |      |
| TC0600000768.mm.1 | -1,11 Prdm5         | JUC0600002898.mm.1 | 2,52   | 0,01912  | 0,472394                     |      |
| TC0600000768.mm.1 | -1,11 Prdm5         | JUC0600002896.mm.1 | 2,36   | 0,009192 | 0,413763                     |      |
| TC0700002090.mm.1 | -1,35 Kcnq1         | JUC0700010034.mm.1 | 2,52   | 0,031919 | 0,518021                     |      |
| TC0700002090.mm.1 | -1,35 Kcnq1         | JUC0700010023.mm.1 | -2,33  | 0,046203 | 0,555959                     |      |
| TC1100002835.mm.1 | -1,03 Zfp39         | JUC1100013289.mm.1 | 2,52   | 0,040993 | 0,543577                     |      |
| TC0X00000053.mm.1 | -1,28 Dgkk          | JUC0X00000045.mm.1 | 2,52   | 0,036405 | 0,530878                     |      |
| TC0X00000053.mm.1 | -1,28 Dgkk          | JUC0X00000057.mm.1 | 2,22   | 0,027581 | 0,504482                     |      |
| TC0X00001612.mm.1 | -1,07 Rps6ka3       | JUC0X00005073.mm.1 | 2,52   | 0,031605 | 0,517338                     |      |
| TC0X00001612.mm.1 | -1,07 Rps6ka3       | JUC0X00005077.mm.1 | -2,41  | 0,043424 | 0,549656                     |      |
| TC0400003885.mm.1 | -1,27 Fblim1        | JUC0400016773.mm.1 | 2,52   | 0,002489 | 0,349135                     |      |
| TC0800000765.mm.1 | 3,46 Rab3a          | JUC0800002883.mm.1 | 2,51   | 0,003266 | 0,354243                     |      |
| TC0800000765.mm.1 | 3,46 Rab3a          | PSR0800005464.mm.1 | -2,88  | 0,049645 | 0,563498 Alternative 5' Donc | 0,29 |
| TC0800000765.mm.1 | 3,46 Rab3a          | PSR0800005452.mm.1 | -2,92  | 0,028344 | 0,506843 Alternative 3' Acce | 0,3  |
| TC0800000765.mm.1 | 3,46 Rab3a          | JUC0800002882.mm.1 | -2,95  | 0,023944 | 0,492582                     |      |
| TC0800000765.mm.1 | 3,46 Rab3a          | PSR0800005451.mm.1 | -3,18  | 0,009701 | 0,417746 Alternative 3' Acce | 0,3  |
| TC0800000765.mm.1 | 3,46 Rab3a          | PSR0800005461.mm.1 | -3,33  | 0,009167 | 0,413447 Intron Retention    | 0,66 |
| TC0800000765.mm.1 | 3,46 Rab3a          | PSR0800005456.mm.1 | -3,43  | 0,013378 | 0,442312 Intron Retention    | 0,59 |
| TC0800000765.mm.1 | 3,46 Rab3a          | PSR0800005462.mm.1 | -4,05  | 0,00778  | 0,402902 Intron Retention    | 0,66 |
| TC0800000765.mm.1 | 3,46 Rab3a          | PSR0800005459.mm.1 | -4,62  | 0,024198 | 0,493294 Intron Retention    | 0,75 |
| TC0800000765.mm.1 | 3,46 Rab3a          | PSR0800005453.mm.1 | -6,97  | 0,005828 | 0,383235 Alternative 3' Acce | 0,3  |
| TC0800000765.mm.1 | 3,46 Rab3a          | JUC0800002887.mm.1 | -12,82 | 0,000586 | 0,304044                     |      |
| TC1300001859.mm.1 | 2,73 Elovl2         | JUC1300005957.mm.1 | 2,51   | 0,007039 | 0,396189                     |      |
| TC1300001859.mm.1 | 2,73 Elovl2         | JUC1300005961.mm.1 | -2,66  | 0,037635 | 0,534189                     |      |
| TC1300001859.mm.1 | 2,73 Elovl2         | PSR1300011611.mm.1 | -3,23  | 0,026536 | 0,501411 Cassette Exon       | 0,28 |
| TC1900001323.mm.1 | -2,71 Glis3         | PSR1900011785.mm.1 | 2,51   | 0,011873 | 0,431125 Alternative 5' Donc | 0,22 |
| TC1900001323.mm.1 | -2,71 Glis3         | PSR1900011791.mm.1 | 2,28   | 0,015398 | 0,453964 Cassette Exon       | 0,06 |
| TC1900001323.mm.1 | -2,71 Glis3         | JUC1900006460.mm.1 | 2,27   | 0,039035 | 0,53823                      |      |
| TC1900001323.mm.1 | -2,71 Glis3         | PSR1900011772.mm.1 | 2,24   | 0,017492 | 0,463964 Alternative 3' Acce | 0,16 |
| TC1300000267.mm.1 | -1,24 Slc17a1       | PSR1300001553.mm.1 | 2,51   | 0,004492 | 0,368077 Cassette Exon       | 0,21 |
| TC1300000267.mm.1 | -1,24 Slc17a1       | JUC1300000761.mm.1 | 2,47   | 0,010337 | 0,420958                     |      |
| TC0100003328.mm.1 | 1,94 Rasal2         | JUC0100015608.mm.1 | 2,51   | 0,036044 | 0,52965                      |      |
| TC0100003328.mm.1 | 1,94 Rasal2         | PSR0100027304.mm.1 | -2,09  | 0,046704 | 0,556856 Alternative 3' Acce | 0,17 |
| TC0700002105.mm.1 | 1,25 Shank2         | PSR0700019018.mm.1 | 2,51   | 0,039134 | 0,538491 Cassette Exon       | 0,14 |
| TC0700002105.mm.1 | 1,25 Shank2         | JUC0700010104.mm.1 | 2,34   | 0,040415 | 0,541998                     |      |
| TC0700002105.mm.1 | 1,25 Shank2         | PSR0700019004.mm.1 | 2,12   | 0,018116 | 0,467161 Cassette Exon       | 0,16 |
| TC1700002178.mm.1 | 1,23 Cul9           | PSR1700020496.mm.1 | 2,51   | 0,003219 | 0,354243 Cassette Exon       | 0,13 |
| TC1700002178.mm.1 | 1,23 Cul9           | JUC1700010898.mm.1 | 2,31   | 0,010526 | 0,422224                     |      |
| TC1600001584.mm.1 | -2,16 Eaf2          | JUC1600006736.mm.1 | 2,51   | 0,01395  | 0,446239                     |      |
| TC1600001584.mm.1 | -2,16 Eaf2          | PSR1600012957.mm.1 | 2,29   | 0,030727 | 0,514036 Cassette Exon       | 0,09 |
| TC0200003807.mm.1 | -1,8 Ttn            | JUC0200016902.mm.1 | 2,51   | 0,038305 | 0,536106                     |      |
| TC0200003807.mm.1 | -1,8 Ttn            | JUC0200016920.mm.1 | -2,77  | 0,001114 | 0,317328                     |      |

|                   |                    |                    |       |          |                              |      |
|-------------------|--------------------|--------------------|-------|----------|------------------------------|------|
| TC1300001098.mm.1 | 1,79 Fam169a       | JUC1300003651.mm.1 | 2,51  | 0,028532 | 0,507444                     |      |
| TC0500002010.mm.1 | 1,27 Ptpn12        | JUC0500009936.mm.1 | 2,51  | 0,028024 | 0,505851                     |      |
| TC0500000310.mm.1 | 1,33 Atraid        | JUC0500001454.mm.1 | 2,51  | 0,037747 | 0,53468                      |      |
| TC0700002792.mm.1 | 1,27 Gramd1a       | JUC0700013408.mm.1 | 2,51  | 0,001204 | 0,322097                     |      |
| TC0700002792.mm.1 | 1,27 Gramd1a       | JUC0700013414.mm.1 | -3,39 | 0,026161 | 0,500003                     |      |
| TC0700004647.mm.1 | 1,28 AW146154      | JUC0700013824.mm.1 | 2,51  | 0,030419 | 0,513079                     |      |
| TC0700004191.mm.1 | -1,13 Dnah3        | JUC0700018402.mm.1 | 2,51  | 0,006795 | 0,393554                     |      |
| TC0400001328.mm.1 | -1,14 Gm12898      | JUC0400005248.mm.1 | 2,51  | 0,008159 | 0,40551                      |      |
| TC1100002810.mm.1 | -1,26 Gm12248      | JUC1100013214.mm.1 | 2,51  | 0,018796 | 0,470789                     |      |
| TC1100001933.mm.1 | -1,38 Gm11739      | JUC1100009573.mm.1 | 2,51  | 0,03952  | 0,539762                     |      |
| TC1100002863.mm.1 | -1,05 Cops3        | PSR1100025993.mm.1 | 2,5   | 0,047557 | 0,558707 Alternative 5' Donc | 0,25 |
| TC1100002863.mm.1 | -1,05 Cops3        | PSR1100025997.mm.1 | -2,53 | 0,038702 | 0,537225 Alternative 5' Donc | 0,25 |
| TC0200002757.mm.1 | 1,3 Phactr3        | PSR0200022513.mm.1 | 2,5   | 0,029945 | 0,511499 Alternative 3' Acce | 0,24 |
| TC1700001755.mm.1 | -1,96 Tead3        | PSR1700016150.mm.1 | 2,5   | 0,004749 | 0,371039 Alternative 3' Acce | 0,19 |
| TC1700001755.mm.1 | -1,96 Tead3        | PSR1700016152.mm.1 | 2,23  | 0,036434 | 0,530977 Alternative 3' Acce | 0,19 |
| TC0600003601.mm.1 | -1,62 Foxp1        | PSR0600021891.mm.1 | 2,5   | 0,044193 | 0,551181 Cassette Exon       | 0,18 |
| TC0600003601.mm.1 | -1,62 Foxp1        | JUC0600011352.mm.1 | 2,04  | 0,033904 | 0,52424                      |      |
| TC0200001757.mm.1 | -1,26 Casc5        | PSR0200013117.mm.1 | 2,5   | 0,000405 | 0,297771 Alternative 3' Acce | 0,14 |
| TC0200001757.mm.1 | -1,26 Casc5        | JUC0200006541.mm.1 | -3,38 | 0,019029 | 0,471827                     |      |
| TC0600002044.mm.1 | 1,15 Slc35b4       | PSR0600016062.mm.1 | 2,5   | 0,016565 | 0,459612 Cassette Exon       | 0,13 |
| TC1400000985.mm.1 | 1,46 4930480K23Rik | JUC1400004256.mm.1 | 2,5   | 0,033638 | 0,523462                     |      |
| TC0100002600.mm.1 | -1,04 Cnppd1       | JUC0100011948.mm.1 | 2,5   | 0,02068  | 0,478929                     |      |
| TC0100002600.mm.1 | -1,04 Cnppd1       | JUC0100011950.mm.1 | -2,27 | 0,000829 | 0,311886                     |      |
| TC0100002844.mm.1 | -1,24 St8sia4      | JUC0100013107.mm.1 | 2,5   | 0,011711 | 0,429969                     |      |
| TC1900000977.mm.1 | -1,1 Sipa1         | JUC1900004812.mm.1 | 2,5   | 0,025628 | 0,497926                     |      |
| TC0100000334.mm.1 | 1,27 Ercc5         | JUC0100001399.mm.1 | 2,5   | 0,026735 | 0,502096                     |      |
| TC0100000334.mm.1 | 1,27 Ercc5         | JUC0100001396.mm.1 | 2,41  | 0,017728 | 0,465216                     |      |
| TC1500000278.mm.1 | -1,48 Grhl2        | JUC1500001200.mm.1 | 2,5   | 0,008306 | 0,406181                     |      |
| TC1500000088.mm.1 | -1,59 Slc45a2      | JUC1500000504.mm.1 | 2,5   | 0,032503 | 0,519746                     |      |
| TC0200000082.mm.1 | 1,03 Kin           | JUC0200000251.mm.1 | 2,5   | 0,020033 | 0,476453                     |      |
| TC0200000486.mm.1 | 1,07 Ralgs         | JUC0200001668.mm.1 | 2,5   | 0,004658 | 0,370181                     |      |
| TC0700004491.mm.1 | -1,37              | JUC0700019898.mm.1 | 2,5   | 0,005457 | 0,379939                     |      |
| TC0500000298.mm.1 | -1,18 Cenpa        | JUC0500001294.mm.1 | 2,5   | 0,025053 | 0,496166                     |      |
| TC0700000588.mm.1 | -1,48 Gm10640      | JUC0700002627.mm.1 | 2,5   | 0,030893 | 0,514574                     |      |
| TC0300001802.mm.1 | -1,36 Gnb4         | JUC0300007350.mm.1 | 2,5   | 0,006091 | 0,386809                     |      |
| TC0300001802.mm.1 | -1,36 Gnb4         | JUC0300007347.mm.1 | -2,06 | 0,007302 | 0,398847                     |      |
| TC0X00001658.mm.1 | -1,05 Ap1s2        | JUC0X00005376.mm.1 | 2,5   | 0,019513 | 0,474538                     |      |
| TC0900001939.mm.1 | 3,67 Glb1l2        | JUC0900009200.mm.1 | 2,49  | 0,041749 | 0,545426                     |      |
| TC0900001939.mm.1 | 3,67 Glb1l2        | JUC0900009204.mm.1 | -2,16 | 0,019058 | 0,471978                     |      |
| TC0900001939.mm.1 | 3,67 Glb1l2        | PSR0900016246.mm.1 | -2,33 | 0,006334 | 0,389463 Alternative 3' Acce | 0,09 |
| TC0900001939.mm.1 | 3,67 Glb1l2        | PSR0900016240.mm.1 | -2,35 | 0,030742 | 0,514065 Intron Retention    | 0,26 |
| TC0900001939.mm.1 | 3,67 Glb1l2        | JUC0900009198.mm.1 | -2,43 | 0,014488 | 0,449377                     |      |
| TC0900001939.mm.1 | 3,67 Glb1l2        | PSR0900016260.mm.1 | -2,68 | 0,025344 | 0,497329 Cassette Exon       | 0,2  |
| TC0900001939.mm.1 | 3,67 Glb1l2        | PSR0900016267.mm.1 | -3,01 | 0,00953  | 0,416602 Cassette Exon       | 0,36 |
| TC0900001939.mm.1 | 3,67 Glb1l2        | PSR0900016269.mm.1 | -3,28 | 0,008021 | 0,404268 Cassette Exon       | 0,21 |
| TC0900001939.mm.1 | 3,67 Glb1l2        | JUC0900009207.mm.1 | -3,38 | 0,009593 | 0,417183                     |      |
| TC0900001939.mm.1 | 3,67 Glb1l2        | PSR0900016264.mm.1 | -3,42 | 0,010728 | 0,423745 Cassette Exon       | 0,28 |
| TC0900001939.mm.1 | 3,67 Glb1l2        | JUC0900009201.mm.1 | -3,58 | 0,004977 | 0,373851                     |      |

|                   |                             |                    |       |          |          |                          |
|-------------------|-----------------------------|--------------------|-------|----------|----------|--------------------------|
| TC0900001939.mm.1 | 3,67 Glb1l2                 | JUC0900009188.mm.1 | -4,39 | 0,000777 | 0,309336 |                          |
| TC0900001939.mm.1 | 3,67 Glb1l2                 | JUC0900009209.mm.1 | -9,17 | 0,00115  | 0,317344 |                          |
| TC0500003582.mm.1 | 3,72 Tmem130                | JUC0500017855.mm.1 | 2,49  | 0,002662 | 0,349612 |                          |
| TC0500003582.mm.1 | 3,72 Tmem130                | PSR0500032835.mm.1 | -2,1  | 0,012874 | 0,438024 | Cassette Exon 0,2        |
| TC0500003582.mm.1 | 3,72 Tmem130                | JUC0500017853.mm.1 | -2,88 | 0,042937 | 0,548271 |                          |
| TC0500003582.mm.1 | 3,72 Tmem130                | PSR0500032845.mm.1 | -3,2  | 0,009481 | 0,416578 | Alternative 5' Donc 0,22 |
| TC0500003582.mm.1 | 3,72 Tmem130                | JUC0500017851.mm.1 | -4,44 | 0,008988 | 0,411965 |                          |
| TC1000001138.mm.1 | 1,17 Ntn4                   | PSR1000008635.mm.1 | 2,49  | 0,045035 | 0,553049 | Alternative 5' Donc 0,22 |
| TC0500000360.mm.1 | 1,27 Tacc3                  | JUC0500001862.mm.1 | 2,49  | 0,028274 | 0,506588 |                          |
| TC0500000360.mm.1 | 1,27 Tacc3                  | PSR0500003353.mm.1 | 2,38  | 0,024304 | 0,49362  | Alternative 3' Acce 0,21 |
| TC1200002030.mm.1 | -1,13                       | PSR1200013996.mm.1 | 2,49  | 0,01222  | 0,433326 | Alternative 5' Donc 0,21 |
| TC1800001312.mm.1 | 1,65 Sema6a                 | JUC1800005405.mm.1 | 2,49  | 0,019997 | 0,476227 |                          |
| TC1800001312.mm.1 | 1,65 Sema6a                 | JUC1800005411.mm.1 | -2,28 | 0,004538 | 0,368648 |                          |
| TC1800001312.mm.1 | 1,65 Sema6a                 | PSR1800009740.mm.1 | -2,37 | 0,034617 | 0,52602  | Cassette Exon 0,19       |
| TC1800001312.mm.1 | 1,65 Sema6a                 | PSR1800009741.mm.1 | -2,57 | 0,009711 | 0,417826 | Cassette Exon 0,21       |
| TC1000002393.mm.1 | -2,16 Gm867                 | PSR1000017154.mm.1 | 2,49  | 0,009616 | 0,417315 | Cassette Exon 0,19       |
| TC1000002393.mm.1 | -2,16 Gm867                 | JUC1000009356.mm.1 | 2,16  | 0,017098 | 0,46232  |                          |
| TC1900001549.mm.1 | -1,65 Cpn1                  | PSR1900013672.mm.1 | 2,49  | 0,010948 | 0,425002 | Alternative 5' Donc 0,17 |
| TC0Y00000221.mm.1 | -1,29 Gm21857; Mid1         | PSR0Y00001252.mm.1 | 2,49  | 0,012607 | 0,435947 | Cassette Exon 0,16       |
| TC0Y00000224.mm.1 | -1,29 Mid1                  | PSR0Y00001284.mm.1 | 2,49  | 0,012607 | 0,435947 | Cassette Exon 0,16       |
| TC1700000564.mm.1 | -1,28 Cyp4f16               | PSR1700005108.mm.1 | 2,49  | 0,049253 | 0,562576 | Cassette Exon 0,16       |
| TC1300002024.mm.1 | 1,24 Drd1a                  | PSR1300012641.mm.1 | 2,49  | 0,01105  | 0,42586  | Alternative 5' Donc 0,12 |
| TC1300002024.mm.1 | 1,24 Drd1a                  | PSR1300012639.mm.1 | -2,01 | 0,001772 | 0,336311 | Alternative 3' Acce 0,15 |
| TC1700001511.mm.1 | -1,69                       | PSR1700013491.mm.1 | 2,49  | 0,022281 | 0,486046 | Cassette Exon 0,15       |
| TC0300001161.mm.1 | 1,03 Vav3                   | JUC0300004924.mm.1 | 2,49  | 0,049882 | 0,563773 |                          |
| TC0300001161.mm.1 | 1,03 Vav3                   | PSR0300009521.mm.1 | 2,44  | 0,019161 | 0,472719 | Cassette Exon 0,14       |
| TC0700001096.mm.1 | -2,2                        | JUC0700004957.mm.1 | 2,49  | 0,037173 | 0,53313  |                          |
| TC0700001096.mm.1 | -2,2                        | PSR0700009680.mm.1 | 2,13  | 0,000648 | 0,304044 | Cassette Exon 0,1        |
| TC0200003106.mm.1 | 1,11 Spopl                  | JUC0200012824.mm.1 | 2,49  | 0,023856 | 0,492097 |                          |
| TC0300000910.mm.1 | -1,35 Mcl1                  | JUC0300003769.mm.1 | 2,49  | 0,000148 | 0,272178 |                          |
| TC0200003592.mm.1 | 1,35 Baz2b; LOC100505179    | JUC0200015499.mm.1 | 2,49  | 0,048548 | 0,561008 |                          |
| TC0200003592.mm.1 | 1,35 Baz2b; LOC100505179    | JUC0200015523.mm.1 | 2,49  | 0,004683 | 0,370323 |                          |
| TC0200003592.mm.1 | 1,35 Baz2b; LOC100505179    | JUC0200015497.mm.1 | 2,11  | 0,018483 | 0,46874  |                          |
| TC0200003592.mm.1 | 1,35 Baz2b; LOC100505179    | JUC0200015536.mm.1 | -2,84 | 0,003475 | 0,355628 |                          |
| TC0100003119.mm.1 | -1,18 Lgr6                  | JUC0100014284.mm.1 | 2,49  | 0,019387 | 0,473657 |                          |
| TC1700001084.mm.1 | -1,08 Ddx11                 | JUC1700005515.mm.1 | 2,49  | 0,005783 | 0,383104 |                          |
| TC1900001169.mm.1 | 1,02 Zfp91; Cntf; Zfp91Cntf | JUC1900005915.mm.1 | 2,49  | 0,012431 | 0,43528  |                          |
| TC0100000464.mm.1 | -1,17 Fam117b               | JUC0100002201.mm.1 | 2,49  | 0,04761  | 0,558743 |                          |
| TC1800001723.mm.1 | -1,26                       | JUC1800006825.mm.1 | 2,49  | 0,026589 | 0,501731 |                          |
| TC0100001125.mm.1 | 1,16 Rab3gap1               | JUC0100005296.mm.1 | 2,49  | 0,033964 | 0,524252 |                          |
| TC0100001125.mm.1 | 1,16 Rab3gap1               | JUC0100005288.mm.1 | 2,07  | 0,039312 | 0,539263 |                          |
| TC1900000491.mm.1 | 1,02 Lipn                   | JUC1900002276.mm.1 | 2,49  | 0,048178 | 0,560073 |                          |
| TC1500002159.mm.1 | 1,05 Vdr                    | JUC1500009944.mm.1 | 2,49  | 0,016439 | 0,459014 |                          |
| TC1500000878.mm.1 | 1,07 Shank3                 | JUC1500003918.mm.1 | 2,49  | 0,00304  | 0,353826 |                          |
| TC1500000878.mm.1 | 1,07 Shank3                 | JUC1500003903.mm.1 | -2,75 | 0,01955  | 0,474538 |                          |
| TC0700001332.mm.1 | 1,36 Tenm4                  | JUC0700005855.mm.1 | 2,49  | 0,03235  | 0,519174 |                          |
| TC0700002672.mm.1 | 1,02 Map3k10                | JUC0700012406.mm.1 | 2,49  | 0,021256 | 0,481453 |                          |
| TC0700002049.mm.1 | -1,38 Taldo1                | JUC0700009633.mm.1 | 2,49  | 0,004298 | 0,364027 |                          |

|                   |                                |                    |       |          |          |                          |
|-------------------|--------------------------------|--------------------|-------|----------|----------|--------------------------|
| TC0900002196.mm.1 | -1,24 Tmprss4                  | JUC0900010318.mm.1 | 2,49  | 0,007577 | 0,401703 |                          |
| TC0900002127.mm.1 | -1,18 Pou2f3                   | JUC0900009983.mm.1 | 2,49  | 0,004459 | 0,36753  |                          |
| TC1000000175.mm.1 | -1,28 H60b; Raet1a; Raet1b; Ra | JUC1000000714.mm.1 | 2,49  | 0,040637 | 0,542602 |                          |
| TC0Y00000367.mm.1 | -1,67 Gm20923; LOC101056194    | JUC0Y00001630.mm.1 | 2,49  | 0,005893 | 0,383835 |                          |
| TC0Y00000426.mm.1 | -1,67 Gm21171; LOC101056194    | JUC0Y00001740.mm.1 | 2,49  | 0,005893 | 0,383835 |                          |
| TC0Y00000437.mm.1 | -1,67 Gm20874; LOC101056194    | JUC0Y00001750.mm.1 | 2,49  | 0,005893 | 0,383835 |                          |
| TC0Y00000438.mm.1 | -1,67 Gm20937; LOC101056194    | JUC0Y00001756.mm.1 | 2,49  | 0,005893 | 0,383835 |                          |
| TC0Y00000452.mm.1 | -1,67 Gm20843; LOC101056194    | JUC0Y00001777.mm.1 | 2,49  | 0,005893 | 0,383835 |                          |
| TC0Y00000145.mm.1 | -1,67 Gm21209; LOC101056194    | JUC0Y00000414.mm.1 | 2,49  | 0,005893 | 0,383835 |                          |
| TC0Y00000170.mm.1 | -1,67 Gm21518; LOC101056194    | JUC0Y00000623.mm.1 | 2,49  | 0,005893 | 0,383835 |                          |
| TC0Y00000190.mm.1 | -1,67 Gm20888; LOC101056194    | JUC0Y00000669.mm.1 | 2,49  | 0,005893 | 0,383835 |                          |
| TC0Y00000202.mm.1 | -1,67 Gm21650; LOC101056194    | JUC0Y00000764.mm.1 | 2,49  | 0,005893 | 0,383835 |                          |
| TC0Y00000201.mm.1 | -1,67 Gm21638; LOC101056194    | JUC0Y00000758.mm.1 | 2,49  | 0,005893 | 0,383835 |                          |
| TC0400001594.mm.1 | -1,1 Eya3                      | PSR0400012506.mm.1 | 2,48  | 0,007947 | 0,403819 | Cassette Exon 0,24       |
| TC0200005333.mm.1 | 1,28 Gm14443                   | JUC0200023398.mm.1 | 2,48  | 0,029738 | 0,511096 |                          |
| TC0200005333.mm.1 | 1,28 Gm14443                   | PSR0200045440.mm.1 | 2,15  | 0,004147 | 0,3623   | Cassette Exon 0,19       |
| TC1700001395.mm.1 | -1,38 Tagap1                   | PSR1700012581.mm.1 | 2,48  | 0,015417 | 0,454055 | Cassette Exon 0,17       |
| TC0500000991.mm.1 | -1,6 9430085M18Rik             | PSR0500008374.mm.1 | 2,48  | 0,021181 | 0,480978 | Cassette Exon 0,16       |
| TC0800001959.mm.1 | 4,98 Chrna6                    | JUC0800008499.mm.1 | 2,48  | 0,016376 | 0,458693 |                          |
| TC0800001959.mm.1 | 4,98 Chrna6                    | PSR0800015561.mm.1 | 2,32  | 0,014506 | 0,449545 | Cassette Exon 0,12       |
| TC0800001959.mm.1 | 4,98 Chrna6                    | JUC0800008498.mm.1 | -2,2  | 0,023611 | 0,491012 |                          |
| TC0800001959.mm.1 | 4,98 Chrna6                    | PSR0800015560.mm.1 | -2,28 | 0,00269  | 0,349612 | Cassette Exon 0,05       |
| TC0200002797.mm.1 | -1 Col9a3                      | JUC0200011604.mm.1 | 2,48  | 0,023195 | 0,490032 |                          |
| TC0200004958.mm.1 | -1,18 Pigu                     | JUC0200021692.mm.1 | 2,48  | 0,021832 | 0,484607 |                          |
| TC1700000858.mm.1 | -1,11 B230354K17Rik            | JUC1700004399.mm.1 | 2,48  | 0,036801 | 0,532069 |                          |
| TC1500001534.mm.1 | -1,47 Dscc1                    | JUC1500006551.mm.1 | 2,48  | 0,043112 | 0,548605 |                          |
| TC1700000349.mm.1 | -1,38 Rps2; Snora64; Gm8842; ( | JUC1700001477.mm.1 | 2,48  | 0,02337  | 0,490143 |                          |
| TC1700000349.mm.1 | -1,38 Rps2; Snora64; Gm8842; ( | PSR1700002692.mm.1 | 2,24  | 0,006599 | 0,39213  |                          |
| TC1600001233.mm.1 | -1,3 Pla2g10                   | JUC1600005127.mm.1 | 2,48  | 0,000617 | 0,304044 |                          |
| TC0900000876.mm.1 | -1,25 Rps27l                   | PSR0900006793.mm.1 | 2,48  | 0,04176  | 0,545489 |                          |
| TC0800002628.mm.1 | -1,05 Abcc12                   | JUC0800010965.mm.1 | 2,48  | 0,002269 | 0,34579  |                          |
| TC0800002628.mm.1 | -1,05 Abcc12                   | JUC0800010967.mm.1 | -2,73 | 0,00569  | 0,382387 |                          |
| TC0700002924.mm.1 | -1,01 Zfp141                   | JUC0700013870.mm.1 | 2,48  | 0,012146 | 0,432868 |                          |
| TC0700002924.mm.1 | -1,01 Zfp141                   | JUC0700013874.mm.1 | -2,88 | 0,031002 | 0,514828 |                          |
| TC0400003747.mm.1 | 1,18 Tmem57                    | JUC0400016052.mm.1 | 2,48  | 0,049691 | 0,563531 |                          |
| TC0400003670.mm.1 | -2,38 Phactr4                  | PSR0400030116.mm.1 | 2,48  | 0,006583 | 0,39213  |                          |
| TC1700001247.mm.1 | -1,43 Mta3                     | PSR1700011553.mm.1 | 2,47  | 0,039405 | 0,539557 | Cassette Exon 0,17       |
| TC0400003395.mm.1 | -1,9 Tmem125                   | PSR0400027543.mm.1 | 2,47  | 0,014157 | 0,447466 | Cassette Exon 0,15       |
| TC0400003395.mm.1 | -1,9 Tmem125                   | PSR0400027544.mm.1 | 2,28  | 0,027138 | 0,503096 | Cassette Exon 0,13       |
| TC0700000402.mm.1 | -1,55 Cd79a                    | PSR0700002998.mm.1 | 2,47  | 0,003276 | 0,354243 | Cassette Exon 0,15       |
| TC0X00000316.mm.1 | -2,39 Il13ra1                  | PSR0X00002103.mm.1 | 2,47  | 0,016182 | 0,457969 | Alternative 3' Acce 0,12 |
| TC1100001235.mm.1 | -1,29 Unc45b                   | JUC1100006063.mm.1 | 2,47  | 0,007239 | 0,39826  |                          |
| TC1100001235.mm.1 | -1,29 Unc45b                   | PSR1100011581.mm.1 | -2,15 | 0,036468 | 0,531117 | Cassette Exon 0,11       |
| TC0100003113.mm.1 | 1,34 Ppp1r12b                  | JUC0100014264.mm.1 | 2,47  | 0,021398 | 0,482036 |                          |
| TC1500000787.mm.1 | -1 Parvg                       | PSR1500006202.mm.1 | 2,47  | 0,012096 | 0,43255  |                          |
| TC1500000787.mm.1 | -1 Parvg                       | JUC1500003477.mm.1 | -2,56 | 0,028509 | 0,507386 |                          |
| TC1700000431.mm.1 | -1,08 Itpr3; Mir7677; mmu-mir- | JUC1700002038.mm.1 | 2,47  | 0,022569 | 0,487322 |                          |
| TC0800001110.mm.1 | -1,16 Nlrc5; Mir7072; mmu-mir- | JUC0800004587.mm.1 | 2,47  | 0,020659 | 0,478862 |                          |



|                       |                                                   |                      |          |          |                              |      |
|-----------------------|---------------------------------------------------|----------------------|----------|----------|------------------------------|------|
| TC0800001110.mm.1     | -1,16 Nlrc5; Mir7072; mmu-mir- PSR0800008610.mm.1 | -2,04                | 0,009467 | 0,416539 |                              |      |
| TC0800001586.mm.1     | -1,31 Pard3                                       | JUC0800007098.mm.1   | 2,47     | 0,00953  | 0,416602                     |      |
| TC0900001200.mm.1     | -1,04 Pcolce2                                     | JUC0900005115.mm.1   | 2,47     | 0,041023 | 0,543661                     |      |
| TC0800003163.mm.1     | 1,11 Abcb10                                       | JUC0800013264.mm.1   | 2,47     | 0,006863 | 0,394112                     |      |
| TC0600001418.mm.1     | 1,08 Cd163                                        | JUC0600006017.mm.1   | 2,47     | 0,037596 | 0,534053                     |      |
| TC0300001445.mm.1     | -1,47 Gbp7                                        | JUC0300006113.mm.1   | 2,47     | 0,012989 | 0,439245                     |      |
| TC1100001331.mm.1     | 1,58 Trim37                                       | JUC1100006523.mm.1   | 2,47     | 0,009307 | 0,414883                     |      |
| TC1100001331.mm.1     | 1,58 Trim37                                       | JUC1100006518.mm.1   | 2,24     | 0,010732 | 0,423745                     |      |
| TC0900003064.mm.1     | 1,61 Wdr6                                         | JUC0900014478.mm.1   | 2,47     | 0,037841 | 0,534803                     |      |
| TCX_GL456233_random00 | 2,69 Spry3                                        | PSRX_GL456233_random | 2,46     | 0,011016 | 0,425624 Cassette Exon       | 0,23 |
| TCX_GL456233_random00 | 2,69 Spry3                                        | PSRX_GL456233_random | 2,41     | 0,010946 | 0,425002 Alternative 5' Donc | 0,32 |
| TC1700000662.mm.1     | -1,91 Clic1                                       | PSR1700006675.mm.1   | 2,46     | 0,006977 | 0,395722 Alternative 5' Donc | 0,23 |
| TC0100002470.mm.1     | -1,56 Fzd5                                        | PSR0100020049.mm.1   | 2,46     | 0,000879 | 0,311909 Alternative 3' Acce | 0,21 |
| TC1700001453.mm.1     | -1,35 Gm7162                                      | PSR1700012965.mm.1   | 2,46     | 0,005824 | 0,383169 Alternative 5' Donc | 0,18 |
| TC0400002021.mm.1     | 1,64 lcmt                                         | JUC0400008676.mm.1   | 2,46     | 0,002417 | 0,348907                     |      |
| TC0400002021.mm.1     | 1,64 lcmt                                         | JUC0400008677.mm.1   | 2,46     | 0,016178 | 0,457969                     |      |
| TC0400002021.mm.1     | 1,64 lcmt                                         | JUC0400008673.mm.1   | 2,41     | 0,008122 | 0,405267                     |      |
| TC0400002021.mm.1     | 1,64 lcmt                                         | PSR0400016558.mm.1   | 2,25     | 0,021559 | 0,483034 Cassette Exon       | 0,07 |
| TC0400002021.mm.1     | 1,64 lcmt                                         | PSR0400016559.mm.1   | 2,1      | 0,004568 | 0,369396 Cassette Exon       | 0,17 |
| TC0200000694.mm.1     | 1,02 Crb2                                         | PSR0200006134.mm.1   | 2,46     | 0,002367 | 0,34829 Cassette Exon        | 0,16 |
| TC0200000694.mm.1     | 1,02 Crb2                                         | PSR0200006130.mm.1   | 2,03     | 0,020218 | 0,477145 Cassette Exon       | 0,14 |
| TC1800000281.mm.1     | -1,5                                              | JUC1800001178.mm.1   | 2,46     | 0,040313 | 0,541838                     |      |
| TC1800000281.mm.1     | -1,5                                              | PSR1800002003.mm.1   | 2,11     | 0,041492 | 0,544746 Alternative 5' Donc | 0,16 |
| TC1800000281.mm.1     | -1,5                                              | JUC1800001175.mm.1   | 2,04     | 0,036923 | 0,53232                      |      |
| TC0X00001274.mm.1     | -1,02 Arl13a                                      | PSR0X00007895.mm.1   | 2,46     | 0,005726 | 0,382767 Cassette Exon       | 0,14 |
| TC0X00001274.mm.1     | -1,02 Arl13a                                      | PSR0X00007888.mm.1   | -2,46    | 0,011151 | 0,42626 Cassette Exon        | 0,13 |
| TC1500001480.mm.1     | 1,43 Csmc3                                        | PSR1500011314.mm.1   | 2,46     | 0,007344 | 0,399264 Cassette Exon       | 0,14 |
| TC1500001480.mm.1     | 1,43 Csmc3                                        | JUC1500006372.mm.1   | -2,12    | 0,038606 | 0,536875                     |      |
| TC1500001480.mm.1     | 1,43 Csmc3                                        | JUC1500006387.mm.1   | -4,78    | 0,003425 | 0,355303                     |      |
| TC0600000788.mm.1     | -1,34 Serbp1                                      | PSR0600005891.mm.1   | 2,46     | 0,03669  | 0,531756 Alternative 5' Donc | 0,08 |
| TC1400000946.mm.1     | 2,34 Stmn4                                        | PSR1400007617.mm.1   | 2,46     | 0,031422 | 0,51654 Cassette Exon        | 0,04 |
| TC1400000946.mm.1     | 2,34 Stmn4                                        | JUC1400004104.mm.1   | 2,02     | 0,038429 | 0,536405                     |      |
| TC1400000946.mm.1     | 2,34 Stmn4                                        | JUC1400004113.mm.1   | -3,09    | 0,039739 | 0,540494                     |      |
| TC1400001920.mm.1     | -1,47 Cnih1; Cnih                                 | JUC1400007958.mm.1   | 2,46     | 0,000877 | 0,311909                     |      |
| TC1300000718.mm.1     | 1,56 Ntrk2                                        | JUC1300002473.mm.1   | 2,46     | 0,040033 | 0,541307                     |      |
| TC1500001662.mm.1     | -1,38                                             | JUC1500007082.mm.1   | 2,46     | 0,003385 | 0,354476                     |      |
| TC0200001597.mm.1     | 1,03 Mpped2                                       | JUC0200006003.mm.1   | 2,46     | 0,005579 | 0,381035                     |      |
| TC1500000862.mm.1     | -1,23 Selo                                        | JUC1500003808.mm.1   | 2,46     | 0,033567 | 0,523133                     |      |
| TC0200001121.mm.1     | -1,04 Agps                                        | JUC0200004608.mm.1   | 2,46     | 0,007132 | 0,397304                     |      |
| TC0200001121.mm.1     | -1,04 Agps                                        | JUC0200004591.mm.1   | 2,04     | 0,024037 | 0,493014                     |      |
| TC0700001269.mm.1     | -1,24 Me3                                         | JUC0700005637.mm.1   | 2,46     | 0,036614 | 0,531494                     |      |
| TC0600001787.mm.1     | -1,88 Samd9l                                      | JUC0600007386.mm.1   | 2,46     | 0,028371 | 0,506881                     |      |
| TC1100002567.mm.1     | -1,42 Pttg1                                       | JUC1100012350.mm.1   | 2,46     | 0,031315 | 0,516204                     |      |
| TC0X00001798.mm.1     | -1,01 Tbc1d25                                     | JUC0X00005816.mm.1   | 2,46     | 0,010016 | 0,418611                     |      |
| TC0400001688.mm.1     | -1,26 Luzp1                                       | JUC0400007031.mm.1   | 2,46     | 0,017201 | 0,462491                     |      |
| TC0800000286.mm.1     | -1,44 Plat                                        | PSR0800002129.mm.1   | 2,45     | 0,034335 | 0,525546 Intron Retention    | 0,36 |
| TC1200001938.mm.1     | -1,26 Wdr89; Rplp2-ps1                            | PSR1200013305.mm.1   | 2,45     | 0,016144 | 0,457937 Alternative 5' Donc | 0,23 |
| TC1000000543.mm.1     | 2,02 Spock2                                       | JUC1000002025.mm.1   | 2,45     | 0,011037 | 0,425682                     |      |

|                   |                     |                    |       |          |                              |      |
|-------------------|---------------------|--------------------|-------|----------|------------------------------|------|
| TC100000543.mm.1  | 2,02 Spock2         | JUC1000002016.mm.1 | 2,44  | 0,024178 | 0,493294                     |      |
| TC100000543.mm.1  | 2,02 Spock2         | PSR1000003670.mm.1 | -2,04 | 0,002118 | 0,342919 Alternative 5' Donc | 0,22 |
| TC100000543.mm.1  | 2,02 Spock2         | PSR1000003658.mm.1 | -2,04 | 0,017809 | 0,46577 Alternative 3' Acce  | 0,12 |
| TC100000543.mm.1  | 2,02 Spock2         | PSR1000003659.mm.1 | -2,07 | 0,022573 | 0,487325 Alternative 3' Acce | 0,13 |
| TC100000543.mm.1  | 2,02 Spock2         | JUC1000002020.mm.1 | -2,09 | 0,036186 | 0,529982                     |      |
| TC100000543.mm.1  | 2,02 Spock2         | JUC1000002024.mm.1 | -2,29 | 0,015784 | 0,455613                     |      |
| TC100000543.mm.1  | 2,02 Spock2         | JUC1000002027.mm.1 | -5,23 | 0,014245 | 0,447947                     |      |
| TC0500001392.mm.1 | -1,43 Arpc3         | PSR0500012322.mm.1 | 2,45  | 0,04269  | 0,548097 Alternative 5' Donc | 0,21 |
| TC1100001707.mm.1 | 1,23 Hexim2         | PSR1100016145.mm.1 | 2,45  | 0,009239 | 0,414373 Alternative 5' Donc | 0,21 |
| TC0700001169.mm.1 | 1,97 Pde8a          | PSR0700010293.mm.1 | 2,45  | 0,049714 | 0,563531 Cassette Exon       | 0,1  |
| TC0700001169.mm.1 | 1,97 Pde8a          | JUC0700005322.mm.1 | -2,14 | 0,048153 | 0,560004                     |      |
| TC0700001169.mm.1 | 1,97 Pde8a          | PSR0700010280.mm.1 | -2,21 | 0,024462 | 0,493992 Alternative 5' Donc | 0,18 |
| TC0700001169.mm.1 | 1,97 Pde8a          | PSR0700010304.mm.1 | -2,23 | 0,029419 | 0,509995 Cassette Exon       | 0,17 |
| TC0700001169.mm.1 | 1,97 Pde8a          | PSR0700010291.mm.1 | -2,63 | 0,008038 | 0,40434 Cassette Exon        | 0,16 |
| TC0700001169.mm.1 | 1,97 Pde8a          | JUC0700005321.mm.1 | -4,2  | 0,009641 | 0,417354                     |      |
| TC0600003221.mm.1 | -2,32               | PSR0600025177.mm.1 | 2,45  | 0,024785 | 0,495079 Alternative 3' Acce | 0,15 |
| TC1700001360.mm.1 | -1,71 4930470H14Rik | PSR1700012328.mm.1 | 2,45  | 0,037641 | 0,534212 Cassette Exon       | 0,14 |
| TC0X00001318.mm.1 | -1,71 5730412P04Rik | PSR0X00008298.mm.1 | 2,45  | 0,014036 | 0,44654 Cassette Exon        | 0,13 |
| TC0X00001318.mm.1 | -1,71 5730412P04Rik | PSR0X00008301.mm.1 | 2,32  | 0,00016  | 0,272566 Cassette Exon       | 0,12 |
| TC1800000809.mm.1 | -1,56 Zbtb7c        | PSR1800005863.mm.1 | 2,45  | 0,020516 | 0,478264 Cassette Exon       | 0,12 |
| TC1400001988.mm.1 | -1,19 Tep1          | JUC1400008140.mm.1 | 2,45  | 0,01527  | 0,452983                     |      |
| TC1400000327.mm.1 | 1,12 Capn7          | JUC1400001697.mm.1 | 2,45  | 0,003212 | 0,354243                     |      |
| TC0300000742.mm.1 | 1,05 Ash1l          | JUC0300002871.mm.1 | 2,45  | 0,008203 | 0,405909                     |      |
| TC1700002225.mm.1 | -1,21 Nfya          | JUC1700011196.mm.1 | 2,45  | 0,026493 | 0,501252                     |      |
| TC0100001268.mm.1 | -1,46 Ddx59         | JUC0100006090.mm.1 | 2,45  | 0,000216 | 0,28803                      |      |
| TC1500001819.mm.1 | -1,43 Myh9; Gm22107 | JUC1500008090.mm.1 | 2,45  | 0,048933 | 0,5618                       |      |
| TC0800001437.mm.1 | 1,17 Gse1           | JUC0800006469.mm.1 | 2,45  | 0,049123 | 0,562253                     |      |
| TC1100001908.mm.1 | 1,18 Ugl2           | JUC1100009361.mm.1 | 2,45  | 0,023833 | 0,491992                     |      |
| TC1100001908.mm.1 | 1,18 Ugl2           | JUC1100009378.mm.1 | -2,26 | 0,001545 | 0,330631                     |      |
| TC0900001979.mm.1 | 1,37 Aplp2          | JUC0900009359.mm.1 | 2,45  | 0,048665 | 0,561341                     |      |
| TC0900001979.mm.1 | 1,37 Aplp2          | JUC0900009357.mm.1 | 2,36  | 0,032963 | 0,52127                      |      |
| TC0900001979.mm.1 | 1,37 Aplp2          | JUC0900009352.mm.1 | -2,55 | 0,044882 | 0,552704                     |      |
| TC1300001653.mm.1 | 4,94 Scgn           | JUC1300005233.mm.1 | 2,44  | 0,033609 | 0,523309                     |      |
| TC1300001653.mm.1 | 4,94 Scgn           | PSR1300010240.mm.1 | -2,47 | 0,012498 | 0,435429 Cassette Exon       | 0,05 |
| TC1300001653.mm.1 | 4,94 Scgn           | PSR1300010234.mm.1 | -8,48 | 0,001791 | 0,336311 Cassette Exon       | 0,34 |
| TC1300001653.mm.1 | 4,94 Scgn           | JUC1300005225.mm.1 | -9,74 | 0,000578 | 0,304044                     |      |
| TC1100002060.mm.1 | 1,75 Hexdc          | PSR1100019879.mm.1 | 2,44  | 0,042664 | 0,548097 Alternative 5' Donc | 0,12 |
| TC1100002060.mm.1 | 1,75 Hexdc          | PSR1100019857.mm.1 | -2,21 | 0,015656 | 0,455329                     |      |
| TC1100002060.mm.1 | 1,75 Hexdc          | PSR1100019880.mm.1 | -2,4  | 0,009447 | 0,416265 Intron Retention    | 0,28 |
| TC1400002186.mm.1 | 2,25 Ebpl           | PSR1400016933.mm.1 | 2,44  | 0,004484 | 0,367949 Cassette Exon       | 0,25 |
| TC1400002186.mm.1 | 2,25 Ebpl           | PSR1400016935.mm.1 | -2,23 | 0,004384 | 0,366156 Alternative 5' Donc | 0,19 |
| TC1400002186.mm.1 | 2,25 Ebpl           | JUC1400009266.mm.1 | -2,62 | 0,025182 | 0,496638                     |      |
| TC0700002135.mm.1 | 1,23 Mboat7         | JUC0700010232.mm.1 | 2,44  | 0,037338 | 0,533573                     |      |
| TC0700002135.mm.1 | 1,23 Mboat7         | PSR0700019279.mm.1 | -2,03 | 0,034641 | 0,526115 Intron Retention    | 0,24 |
| TC1000000136.mm.1 | 2,53 Gm20139        | PSR1000000950.mm.1 | 2,44  | 0,019494 | 0,474486 Alternative 5' Donc | 0,23 |
| TC1000000136.mm.1 | 2,53 Gm20139        | JUC1000000481.mm.1 | -3,29 | 0,01625  | 0,458312                     |      |
| TC1000000136.mm.1 | 2,53 Gm20139        | JUC1000000480.mm.1 | -3,46 | 0,004178 | 0,362543                     |      |
| TC1000000136.mm.1 | 2,53 Gm20139        | JUC1000000479.mm.1 | -3,82 | 0,000287 | 0,28803                      |      |

|                   |              |                    |       |          |          |                     |      |
|-------------------|--------------|--------------------|-------|----------|----------|---------------------|------|
| TC100000136.mm.1  | 2,53 Gm20139 | JUC1000000478.mm.1 | -3,84 | 0,000929 | 0,313363 |                     |      |
| TC0800002265.mm.1 | 2,13 Galntf6 | JUC0800009362.mm.1 | 2,44  | 0,012977 | 0,439245 |                     |      |
| TC0800002265.mm.1 | 2,13 Galntf6 | PSR0800017232.mm.1 | -2,15 | 0,013831 | 0,445222 | Cassette Exon       | 0,2  |
| TC0800002265.mm.1 | 2,13 Galntf6 | PSR0800017219.mm.1 | -2,5  | 0,008959 | 0,411476 | Cassette Exon       | 0,15 |
| TC0800002265.mm.1 | 2,13 Galntf6 | PSR0800017213.mm.1 | -2,96 | 0,00205  | 0,341391 | Cassette Exon       | 0,04 |
| TC0800002265.mm.1 | 2,13 Galntf6 | JUC0800009354.mm.1 | -3,16 | 0,024807 | 0,495222 |                     |      |
| TC0800002265.mm.1 | 2,13 Galntf6 | JUC0800009372.mm.1 | -3,83 | 0,019622 | 0,47483  |                     |      |
| TC0800002265.mm.1 | 2,13 Galntf6 | JUC0800009369.mm.1 | -3,87 | 0,009171 | 0,413447 |                     |      |
| TC0500000806.mm.1 | -1,26 Smr3a  | PSR0500007080.mm.1 | 2,44  | 0,011682 | 0,429939 | Cassette Exon       | 0,15 |
| TC0900003050.mm.1 | 1,53 Rnf123  | JUC0900014362.mm.1 | 2,44  | 0,013279 | 0,441719 |                     |      |
| TC0900003050.mm.1 | 1,53 Rnf123  | PSR0900025679.mm.1 | -2,01 | 0,009237 | 0,414373 | Cassette Exon       | 0,06 |
| TC0900003050.mm.1 | 1,53 Rnf123  | PSR0900025599.mm.1 | -2,08 | 0,0249   | 0,495661 | Alternative 3' Acce | 0,15 |
| TC0900003050.mm.1 | 1,53 Rnf123  | JUC0900014357.mm.1 | -2,09 | 0,020286 | 0,477245 |                     |      |
| TC1400000846.mm.1 | 2,04 Amer2   | PSR1400006919.mm.1 | 2,44  | 0,010035 | 0,41878  | Alternative 5' Donc | 0,15 |
| TC1400000846.mm.1 | 2,04 Amer2   | JUC1400003728.mm.1 | -2,19 | 0,02212  | 0,485558 |                     |      |
| TC1500002294.mm.1 | 1,89 Map3k12 | JUC1500010852.mm.1 | 2,44  | 0,014609 | 0,449914 |                     |      |
| TC1500002294.mm.1 | 1,89 Map3k12 | PSR1500018979.mm.1 | -2,11 | 0,019714 | 0,474887 | Alternative 5' Donc | 0,14 |
| TC1500002294.mm.1 | 1,89 Map3k12 | PSR1500018986.mm.1 | -2,73 | 0,014252 | 0,447947 | Alternative 5' Donc | 0,15 |
| TC1500002294.mm.1 | 1,89 Map3k12 | JUC1500010863.mm.1 | -2,99 | 0,019808 | 0,475245 |                     |      |
| TC0800002398.mm.1 | 1,64 Ssbp4   | JUC0800009892.mm.1 | 2,44  | 0,024645 | 0,49468  |                     |      |
| TC0800002398.mm.1 | 1,64 Ssbp4   | PSR0800018231.mm.1 | 2,08  | 0,010229 | 0,419955 | Cassette Exon       | 0,14 |
| TC0800002398.mm.1 | 1,64 Ssbp4   | PSR0800018225.mm.1 | 2,03  | 0,000364 | 0,290942 | Cassette Exon       | 0,12 |
| TC0800002398.mm.1 | 1,64 Ssbp4   | JUC0800009879.mm.1 | -2,45 | 0,035332 | 0,528404 |                     |      |
| TC1000002185.mm.1 | 1,74 Tbc1d32 | JUC1000008344.mm.1 | 2,44  | 0,041951 | 0,54592  |                     |      |
| TC1000002185.mm.1 | 1,74 Tbc1d32 | PSR1000015336.mm.1 | 2,19  | 0,019607 | 0,474765 | Cassette Exon       | 0,1  |
| TC1000002185.mm.1 | 1,74 Tbc1d32 | PSR1000015312.mm.1 | -2,11 | 0,040247 | 0,541731 | Cassette Exon       | 0,14 |
| TC1300002095.mm.1 | 1 Ubqln1     | PSR1300013302.mm.1 | 2,44  | 0,034047 | 0,524583 | Cassette Exon       | 0,14 |
| TC1100002641.mm.1 | -1,78 Irgm1  | PSR1100024154.mm.1 | 2,44  | 0,012784 | 0,437236 | Alternative 3' Acce | 0,13 |
| TC1100002641.mm.1 | -1,78 Irgm1  | PSR1100024152.mm.1 | 2,03  | 0,029679 | 0,510918 | Cassette Exon       | 0,11 |
| TC0200004959.mm.1 | -1,42 Ncoa6  | JUC0200021706.mm.1 | 2,44  | 0,018808 | 0,470836 |                     |      |
| TC0100000661.mm.1 | 1,13 Tmem198 | JUC0100003273.mm.1 | 2,44  | 0,004023 | 0,361485 |                     |      |
| TC1500001966.mm.1 | 1,34 Poldip3 | JUC1500008770.mm.1 | 2,44  | 0,030057 | 0,511847 |                     |      |
| TC0500001716.mm.1 | -1,05 Ap5z1  | JUC0500008542.mm.1 | 2,44  | 0,001149 | 0,317344 |                     |      |
| TC0600000958.mm.1 | -1,86 Emx1   | JUC0600003768.mm.1 | 2,44  | 0,028297 | 0,506675 |                     |      |
| TC0600003598.mm.1 | -1,4 Cml3    | JUC0600010535.mm.1 | 2,44  | 0,046011 | 0,555624 |                     |      |
| TC0600003598.mm.1 | -1,4 Cml3    | JUC0600010534.mm.1 | -2,84 | 0,018177 | 0,467441 |                     |      |
| TC1100003437.mm.1 | -1,01 Ints2  | JUC1100016489.mm.1 | 2,44  | 0,049296 | 0,562691 |                     |      |
| TC0300001521.mm.1 | -1,47 Eltd1  | JUC0300006473.mm.1 | 2,44  | 0,015083 | 0,452418 |                     |      |
| TC0300001521.mm.1 | -1,47 Eltd1  | JUC0300006476.mm.1 | 2,35  | 0,048885 | 0,561732 |                     |      |
| TC0400001347.mm.1 | -1,14 Scmh1  | JUC0400005356.mm.1 | 2,44  | 0,022634 | 0,487464 |                     |      |
| TC1700001105.mm.1 | 2,3 Epb4.1l3 | PSR1700010435.mm.1 | 2,43  | 0,039068 | 0,538368 | Cassette Exon       | 0,24 |
| TC1700001105.mm.1 | 2,3 Epb4.1l3 | JUC1700005654.mm.1 | 2,19  | 0,012062 | 0,432426 |                     |      |
| TC1700001105.mm.1 | 2,3 Epb4.1l3 | JUC1700005661.mm.1 | 2,12  | 0,030098 | 0,511942 |                     |      |
| TC1700001105.mm.1 | 2,3 Epb4.1l3 | PSR1700010432.mm.1 | -2,34 | 0,022781 | 0,488128 | Cassette Exon       | 0,31 |
| TC1700001105.mm.1 | 2,3 Epb4.1l3 | JUC1700005668.mm.1 | -2,75 | 0,016697 | 0,460085 |                     |      |
| TC1700001105.mm.1 | 2,3 Epb4.1l3 | PSR1700010428.mm.1 | -3,15 | 0,003114 | 0,353892 | Alternative 5' Donc | 0,27 |
| TC1700001105.mm.1 | 2,3 Epb4.1l3 | JUC1700005652.mm.1 | -3,59 | 0,018786 | 0,470789 |                     |      |
| TC1700001105.mm.1 | 2,3 Epb4.1l3 | JUC1700005663.mm.1 | -3,59 | 0,025322 | 0,497278 |                     |      |

|                   |                                 |                    |       |          |          |                          |
|-------------------|---------------------------------|--------------------|-------|----------|----------|--------------------------|
| TC0200001551.mm.1 | -1,7 Cd59b                      | JUC0200005824.mm.1 | 2,43  | 0,019297 | 0,473074 |                          |
| TC0200001551.mm.1 | -1,7 Cd59b                      | PSR0200011655.mm.1 | 2,32  | 0,001412 | 0,326543 | Alternative 5' Donc 0,16 |
| TC0200001551.mm.1 | -1,7 Cd59b                      | PSR0200011649.mm.1 | 2,22  | 0,042808 | 0,548097 | Cassette Exon 0,15       |
| TC0200001551.mm.1 | -1,7 Cd59b                      | JUC0200005817.mm.1 | 2,07  | 0,025391 | 0,497403 |                          |
| TC1300001636.mm.1 | -1,08 Hist1h2be; Hist1h1e; Hist | PSR1300010149.mm.1 | 2,43  | 0,002886 | 0,352207 | Alternative 3' Acce 0,04 |
| TC1300001636.mm.1 | -1,08 Hist1h2be; Hist1h1e; Hist | PSR1300010145.mm.1 | 2,26  | 0,009905 | 0,418332 | Alternative 3' Acce 0,03 |
| TC1300001636.mm.1 | -1,08 Hist1h2be; Hist1h1e; Hist | PSR1300010148.mm.1 | 2,1   | 0,011378 | 0,427502 | Alternative 3' Acce 0,04 |
| TC1300001636.mm.1 | -1,08 Hist1h2be; Hist1h1e; Hist | PSR1300010147.mm.1 | 2,08  | 0,0499   | 0,563773 | Alternative 3' Acce 0,04 |
| TC0300000144.mm.1 | -1,09 Tbl1xr1                   | JUC0300000312.mm.1 | 2,43  | 0,020824 | 0,47952  |                          |
| TC1200002220.mm.1 | 1,27 Nrde2                      | JUC1200008431.mm.1 | 2,43  | 0,006112 | 0,387239 |                          |
| TC1200002220.mm.1 | 1,27 Nrde2                      | JUC1200008421.mm.1 | -2,04 | 0,024149 | 0,493245 |                          |
| TC1700002186.mm.1 | 1,03 Ppp2r5d                    | JUC1700010995.mm.1 | 2,43  | 0,03891  | 0,537874 |                          |
| TC0100002856.mm.1 | -1,39 Slco4c1                   | JUC0100013126.mm.1 | 2,43  | 0,011992 | 0,432286 |                          |
| TC1900000708.mm.1 | -1,19 2010012005Rik             | JUC1900003388.mm.1 | 2,43  | 0,020434 | 0,478018 |                          |
| TC1500000119.mm.1 | 1,3 Cdh9                        | JUC1500000651.mm.1 | 2,43  | 0,023835 | 0,491992 |                          |
| TC1600000850.mm.1 | -1,14 Rbm11                     | JUC1600003702.mm.1 | 2,43  | 0,020419 | 0,477971 |                          |
| TC1600001473.mm.1 | -1,56 Acap2                     | JUC1600006356.mm.1 | 2,43  | 0,041334 | 0,544327 |                          |
| TC1600001473.mm.1 | -1,56 Acap2                     | JUC1600006345.mm.1 | 2,24  | 0,036975 | 0,532502 |                          |
| TC0800001300.mm.1 | 1,14 Zfp821                     | JUC0800005708.mm.1 | 2,43  | 0,026671 | 0,501946 |                          |
| TC0800002798.mm.1 | -1,48 Cmtm2a; Cmtm1             | JUC0800011681.mm.1 | 2,43  | 0,013639 | 0,444258 |                          |
| TC0500001644.mm.1 | 1,4 Ap4m1                       | JUC0500008204.mm.1 | 2,43  | 0,014458 | 0,44909  |                          |
| TC0900002239.mm.1 | 1 Nnmt                          | JUC0900010517.mm.1 | 2,43  | 0,017219 | 0,462614 |                          |
| TC1000000848.mm.1 | 1,05 Dazap1                     | JUC1000003483.mm.1 | 2,43  | 0,024377 | 0,49362  |                          |
| TC1000000848.mm.1 | 1,05 Dazap1                     | JUC1000003490.mm.1 | -2,04 | 0,017265 | 0,462888 |                          |
| TC0400002743.mm.1 | 1,07 Al314180                   | JUC0400011527.mm.1 | 2,43  | 0,022625 | 0,487464 |                          |
| TC0X00003189.mm.1 | 1,09 Kantr; 2900056M20Rik       | PSR0X00020038.mm.1 | 2,43  | 0,027382 | 0,503961 |                          |
| TC0X00003189.mm.1 | 1,09 Kantr; 2900056M20Rik       | JUC0X00010118.mm.1 | -2,79 | 0,019245 | 0,473063 |                          |
| TC1900000027.mm.1 | 3,17 Pitpnm1                    | JUC1900000177.mm.1 | 2,42  | 0,038949 | 0,537874 |                          |
| TC1900000027.mm.1 | 3,17 Pitpnm1                    | PSR1900000338.mm.1 | -2,13 | 0,021512 | 0,482748 | Cassette Exon 0,04       |
| TC1900000027.mm.1 | 3,17 Pitpnm1                    | JUC1900000193.mm.1 | -2,33 | 0,000016 | 0,192353 |                          |
| TC1900000027.mm.1 | 3,17 Pitpnm1                    | PSR1900000384.mm.1 | -2,4  | 0,000864 | 0,311909 | Intron Retention 0,54    |
| TC1900000027.mm.1 | 3,17 Pitpnm1                    | PSR1900000369.mm.1 | -2,68 | 0,017758 | 0,465425 | Intron Retention 0,34    |
| TC1900000027.mm.1 | 3,17 Pitpnm1                    | PSR1900000347.mm.1 | -3,38 | 0,004642 | 0,370181 | Alternative 5' Donc 0,37 |
| TC1900000027.mm.1 | 3,17 Pitpnm1                    | PSR1900000335.mm.1 | -3,54 | 0,006649 | 0,393053 | Cassette Exon 0,25       |
| TC1900000027.mm.1 | 3,17 Pitpnm1                    | JUC1900000198.mm.1 | -3,56 | 0,006908 | 0,394872 |                          |
| TC1900000027.mm.1 | 3,17 Pitpnm1                    | PSR1900000360.mm.1 | -3,68 | 0,01772  | 0,465209 | Alternative 3' Acce 0,31 |
| TC1900000027.mm.1 | 3,17 Pitpnm1                    | JUC1900000186.mm.1 | -3,74 | 0,016761 | 0,460504 |                          |
| TC1900000027.mm.1 | 3,17 Pitpnm1                    | PSR1900000337.mm.1 | -3,76 | 0,001623 | 0,332831 | Cassette Exon 0,39       |
| TC1900000027.mm.1 | 3,17 Pitpnm1                    | PSR1900000336.mm.1 | -3,82 | 0,009208 | 0,414013 | Cassette Exon 0,25       |
| TC1900000027.mm.1 | 3,17 Pitpnm1                    | PSR1900000383.mm.1 | -3,9  | 0,013318 | 0,441836 | Intron Retention 0,55    |
| TC1900000027.mm.1 | 3,17 Pitpnm1                    | JUC1900000199.mm.1 | -4,11 | 0,004935 | 0,373093 |                          |
| TC1900000027.mm.1 | 3,17 Pitpnm1                    | PSR1900000379.mm.1 | -4,54 | 0,001621 | 0,332831 | Intron Retention 0,72    |
| TC1900000027.mm.1 | 3,17 Pitpnm1                    | PSR1900000340.mm.1 | -4,55 | 0,005469 | 0,379939 | Alternative 3' Acce 0,34 |
| TC1900000027.mm.1 | 3,17 Pitpnm1                    | PSR1900000366.mm.1 | -4,77 | 0,010589 | 0,42255  | Alternative 3' Acce 0,38 |
| TC1900000027.mm.1 | 3,17 Pitpnm1                    | JUC1900000173.mm.1 | -6,27 | 0,003066 | 0,353892 |                          |
| TC1900000027.mm.1 | 3,17 Pitpnm1                    | JUC1900000196.mm.1 | -6,73 | 0,025226 | 0,496835 |                          |
| TC0400003171.mm.1 | 3,85 Wdr78                      | JUC0400013116.mm.1 | 2,42  | 0,010625 | 0,422841 |                          |
| TC0400003171.mm.1 | 3,85 Wdr78                      | PSR0400025192.mm.1 | 2,02  | 0,005561 | 0,380778 | Cassette Exon 0,12       |

|                   |                     |                    |       |          |                              |      |
|-------------------|---------------------|--------------------|-------|----------|------------------------------|------|
| TC0400003171.mm.1 | 3,85 Wdr78          | PSR0400025194.mm.1 | -2,09 | 0,013794 | 0,444974 Alternative 5' Donc | 0,18 |
| TC0400003171.mm.1 | 3,85 Wdr78          | PSR0400025193.mm.1 | -2,15 | 0,015047 | 0,452154 Alternative 5' Donc | 0,18 |
| TC0400003171.mm.1 | 3,85 Wdr78          | JUC0400013120.mm.1 | -2,19 | 0,012254 | 0,433778                     |      |
| TC0400003171.mm.1 | 3,85 Wdr78          | JUC0400013127.mm.1 | -2,44 | 0,018471 | 0,468729                     |      |
| TC0400003171.mm.1 | 3,85 Wdr78          | JUC0400013121.mm.1 | -2,45 | 0,034139 | 0,524882                     |      |
| TC0400003171.mm.1 | 3,85 Wdr78          | PSR0400025202.mm.1 | -2,52 | 0,002589 | 0,349501 Cassette Exon       | 0,34 |
| TC0400003171.mm.1 | 3,85 Wdr78          | PSR0400025203.mm.1 | -3,55 | 0,002312 | 0,346468 Cassette Exon       | 0,33 |
| TC0400003171.mm.1 | 3,85 Wdr78          | JUC0400013128.mm.1 | -4,47 | 0,009219 | 0,41411                      |      |
| TC0400003171.mm.1 | 3,85 Wdr78          | PSR0400025183.mm.1 | -4,67 | 0,015476 | 0,45435 Cassette Exon        | 0,32 |
| TC0400003171.mm.1 | 3,85 Wdr78          | PSR0400025206.mm.1 | -4,81 | 0,006361 | 0,389469 Alternative 5' Donc | 0,37 |
| TC0400003171.mm.1 | 3,85 Wdr78          | JUC0400013129.mm.1 | -7,13 | 0,032594 | 0,520272                     |      |
| TC1200001949.mm.1 | -1,46 4930426124Rik | PSR1200013380.mm.1 | 2,42  | 0,0197   | 0,474887 Alternative 5' Donc | 0,18 |
| TC0400002601.mm.1 | -1,18 Trim14        | PSR0400021210.mm.1 | 2,42  | 0,045718 | 0,554833 Cassette Exon       | 0,14 |
| TC0400002601.mm.1 | -1,18 Trim14        | JUC0400010987.mm.1 | 2,05  | 0,025117 | 0,496358                     |      |
| TC0400004225.mm.1 | 1,38 Epha8          | JUC0400016257.mm.1 | 2,42  | 0,03807  | 0,535633                     |      |
| TC0400004225.mm.1 | 1,38 Epha8          | PSR0400031287.mm.1 | 2,25  | 0,003726 | 0,357586 Cassette Exon       | 0,08 |
| TC0400004225.mm.1 | 1,38 Epha8          | PSR0400031284.mm.1 | 2,22  | 0,012321 | 0,434392 Cassette Exon       | 0,14 |
| TC0400004225.mm.1 | 1,38 Epha8          | JUC0400016256.mm.1 | -2,39 | 0,000773 | 0,308853                     |      |
| TC0400004225.mm.1 | 1,38 Epha8          | JUC0400016258.mm.1 | -2,81 | 0,014418 | 0,448786                     |      |
| TC0800002958.mm.1 | -1,85 Chst5         | PSR0800022848.mm.1 | 2,42  | 0,014098 | 0,44706 Cassette Exon        | 0,13 |
| TC0X00000694.mm.1 | 1,01 SrpK3          | PSR0X00004534.mm.1 | 2,42  | 0,015182 | 0,452699 Cassette Exon       | 0,12 |
| TC0900002898.mm.1 | 1,22 Clstn2         | JUC0900013349.mm.1 | 2,42  | 0,000949 | 0,313363                     |      |
| TC0900002898.mm.1 | 1,22 Clstn2         | PSR0900023911.mm.1 | -2,17 | 0,008807 | 0,409934 Cassette Exon       | 0,11 |
| TC1600002055.mm.1 | -1,22 Mis18a        | JUC1600008084.mm.1 | 2,42  | 0,024003 | 0,492783                     |      |
| TC0700004257.mm.1 | -1,81               | JUC0700018661.mm.1 | 2,42  | 0,033367 | 0,522601                     |      |
| TC0800000336.mm.1 | 1,22 Rnf170         | JUC0800001398.mm.1 | 2,42  | 0,045771 | 0,554863                     |      |
| TC0900001155.mm.1 | -1,7 Ctsh           | JUC0900004958.mm.1 | 2,42  | 0,01792  | 0,466466                     |      |
| TC0500003028.mm.1 | -1,04 Sgsm1         | JUC0500014746.mm.1 | 2,42  | 0,021188 | 0,481036                     |      |
| TC0400002799.mm.1 | 1,2 Akna            | JUC0400011984.mm.1 | 2,42  | 0,019051 | 0,471978                     |      |
| TC0400004011.mm.1 | -1,24 Gm13201       | JUC0400017300.mm.1 | 2,42  | 0,039674 | 0,540322                     |      |
| TC0X00002165.mm.1 | 1,01 Aifm1          | JUC0X00006983.mm.1 | 2,42  | 0,020794 | 0,479488                     |      |
| TC1100002932.mm.1 | -1,6 Zswim7         | PSR1100026680.mm.1 | 2,41  | 0,028032 | 0,505851 Cassette Exon       | 0,13 |
| TC1100002932.mm.1 | -1,6 Zswim7         | JUC1100013912.mm.1 | 2,3   | 0,025592 | 0,497808                     |      |
| TC1100002932.mm.1 | -1,6 Zswim7         | PSR1100026678.mm.1 | 2,02  | 0,001671 | 0,335182 Cassette Exon       | 0,24 |
| TC0400002174.mm.1 | 2,24 Car8           | JUC0400009492.mm.1 | 2,41  | 0,049739 | 0,563564                     |      |
| TC0400002174.mm.1 | 2,24 Car8           | PSR0400018182.mm.1 | -3,24 | 0,000927 | 0,313363 Cassette Exon       | 0,21 |
| TC0100000353.mm.1 | 1,49 Dnah7b; Dnah7c | JUC0100001522.mm.1 | 2,41  | 0,00947  | 0,416539                     |      |
| TC0100000353.mm.1 | 1,49 Dnah7b; Dnah7c | PSR0100002674.mm.1 | 2,17  | 0,015151 | 0,452699 Cassette Exon       | 0,2  |
| TC0100000353.mm.1 | 1,49 Dnah7b; Dnah7c | PSR0100002682.mm.1 | 2,03  | 0,032614 | 0,520338 Cassette Exon       | 0,1  |
| TC0300000129.mm.1 | -1,55 Dnajc5b       | PSR0300000553.mm.1 | 2,41  | 0,011056 | 0,425887 Alternative 3' Acce | 0,19 |
| TC1100002374.mm.1 | -1,71 Rel           | PSR1100022380.mm.1 | 2,41  | 0,01939  | 0,47371 Alternative 3' Acce  | 0,19 |
| TC1100002374.mm.1 | -1,71 Rel           | PSR1100022392.mm.1 | 2,2   | 0,032945 | 0,52122 Alternative 5' Donc  | 0,17 |
| TC1700001642.mm.1 | 1,18 Ndufb10        | PSR1700014712.mm.1 | 2,41  | 0,031629 | 0,517405 Alternative 5' Donc | 0,19 |
| TC0300000521.mm.1 | 1,65 Kcnab1         | JUC0300001869.mm.1 | 2,41  | 0,032492 | 0,519646                     |      |
| TC0300000521.mm.1 | 1,65 Kcnab1         | JUC0300001872.mm.1 | -2,09 | 0,00096  | 0,313363                     |      |
| TC0300000521.mm.1 | 1,65 Kcnab1         | PSR0300003565.mm.1 | -2,33 | 0,042269 | 0,547092 Cassette Exon       | 0,16 |
| TC0300000521.mm.1 | 1,65 Kcnab1         | PSR0300003559.mm.1 | -2,52 | 0,021499 | 0,482708 Cassette Exon       | 0,17 |
| TC1600001590.mm.1 | 1,25 Stxbp5l        | PSR1600013007.mm.1 | 2,41  | 0,041139 | 0,544 Cassette Exon          | 0,14 |

|                   |                            |                            |       |          |                              |      |
|-------------------|----------------------------|----------------------------|-------|----------|------------------------------|------|
| TC1600001590.mm.1 | 1,25 Stxbp5l               | PSR1600012999.mm.1         | -2,08 | 0,023109 | 0,489756 Alternative 3' Acce | 0,16 |
| TC0100000509.mm.1 | -1,51 Nrp2                 | PSR0100004095.mm.1         | 2,41  | 0,013734 | 0,444758 Alternative 3' Acce | 0,15 |
| TC0900000493.mm.1 | 2,34 Gm3898                | PSR0900003227.mm.1         | 2,41  | 0,009835 | 0,417839 Cassette Exon       | 0,15 |
| TC0900000493.mm.1 | 2,34 Gm3898                | PSR0900003225.mm.1         | -2,05 | 0,037498 | 0,533968 Cassette Exon       | 0,1  |
| TC0500001607.mm.1 | -1,09 Myl10                | PSR0500014536.mm.1         | 2,41  | 0,001017 | 0,316361 Cassette Exon       | 0,14 |
| TC0500002819.mm.1 | 1,59 A930011G23Rik         | PSR0500024766.mm.1         | 2,41  | 0,023807 | 0,491893 Cassette Exon       | 0,14 |
| TC0500002819.mm.1 | 1,59 A930011G23Rik         | JUC0500013473.mm.1         | -2,52 | 0,012085 | 0,43255                      |      |
| TC1100002895.mm.1 | 1,01 Top3a                 | PSR1100026250.mm.1         | 2,41  | 0,03982  | 0,540873 Cassette Exon       | 0,14 |
| TC1300000705.mm.1 | -2,24                      | PSR1300004653.mm.1         | 2,41  | 0,028484 | 0,50733 Cassette Exon        | 0,13 |
| TC0600001403.mm.1 | -1,36 Clec4n               | PSR0600011323.mm.1         | 2,41  | 0,002123 | 0,342919 Cassette Exon       | 0,12 |
| TC0600002861.mm.1 | -2,07 Pdzrn3               | JUC0600011426.mm.1         | 2,41  | 0,021556 | 0,483034                     |      |
| TC0600002861.mm.1 | -2,07 Pdzrn3               | PSR0600022025.mm.1         | 2,1   | 0,024688 | 0,494744 Cassette Exon       | 0,12 |
| TC1400002476.mm.1 | 1,11 Dgkh                  | JUC1400010494.mm.1         | 2,41  | 0,010335 | 0,420915                     |      |
| TC1400002476.mm.1 | 1,11 Dgkh                  | JUC1400010517.mm.1         | -2,22 | 0,046055 | 0,555632                     |      |
| TC1400002476.mm.1 | 1,11 Dgkh                  | PSR1400019063.mm.1         | -2,88 | 0,039595 | 0,539903 Cassette Exon       | 0,12 |
| TC0300000467.mm.1 | 1,21 Med12l                | JUC0300001699.mm.1         | 2,41  | 0,01403  | 0,44654                      |      |
| TC0300000467.mm.1 | 1,21 Med12l                | JUC0300001682.mm.1         | 2,08  | 0,036886 | 0,532257                     |      |
| TC1500001912.mm.1 | -1,81 Mkl1                 | JUC1500008531.mm.1         | 2,41  | 0,027031 | 0,502979                     |      |
| TC1700000269.mm.1 | -1,43 Zfp677               | JUC1700001079.mm.1         | 2,41  | 0,033972 | 0,524252                     |      |
| TC0100003399.mm.1 | -1,14 Fmo4                 | JUC0100015935.mm.1         | 2,41  | 0,002372 | 0,34829                      |      |
| TC0800001340.mm.1 | -1,68                      | JUC0800006034.mm.1         | 2,41  | 0,011295 | 0,427117                     |      |
| TC0500000178.mm.1 | 1,28                       | JUC0500000758.mm.1         | 2,41  | 0,035294 | 0,52837                      |      |
| TC0500001153.mm.1 | 1,03 Ttc28                 | JUC0500005431.mm.1         | 2,41  | 0,00618  | 0,387873                     |      |
| TC0700002033.mm.1 | -1,38 Athl1                | JUC0700009469.mm.1         | 2,41  | 0,017037 | 0,461729                     |      |
| TC0700002033.mm.1 | -1,38 Athl1                | JUC0700009484.mm.1         | 2,29  | 0,022056 | 0,485327                     |      |
| TC0400003116.mm.1 | 1,23 Tm2d1                 | JUC0400012948.mm.1         | 2,41  | 0,020043 | 0,476453                     |      |
| TC0400003116.mm.1 | 1,23 Tm2d1                 | JUC0400012956.mm.1         | -8,36 | 0,038645 | 0,537098                     |      |
| TC0900002029.mm.1 | -1,42 Gm5916; RP23-319C8.2 | JUC0900009506.mm.1         | 2,41  | 0,005726 | 0,382767                     |      |
| TC1000001190.mm.1 | -1,82 Lum                  | JUC1000004825.mm.1         | 2,41  | 0,01852  | 0,469138                     |      |
| TC1100004272.mm.1 | 1,76                       | sept-04 PSR1100012532.mm.1 | 2,4   | 0,003974 | 0,360082 Alternative 5' Donc | 0,11 |
| TC1100004272.mm.1 | 1,76                       | sept-04 JUC1100006579.mm.1 | 2,38  | 0,047536 | 0,558701                     |      |
| TC1100004272.mm.1 | 1,76                       | sept-04 PSR1100012528.mm.1 | 2,2   | 0,015201 | 0,452738 Cassette Exon       | 0,18 |
| TC0100000814.mm.1 | 1,07 Gigyf2                | JUC0100003907.mm.1         | 2,4   | 0,048588 | 0,561078                     |      |
| TC0100000814.mm.1 | 1,07 Gigyf2                | PSR0100006850.mm.1         | 2,02  | 0,027028 | 0,502979 Cassette Exon       | 0,14 |
| TC0100000814.mm.1 | 1,07 Gigyf2                | PSR0100006858.mm.1         | -2,08 | 0,00852  | 0,407614                     |      |
| TC0100000814.mm.1 | 1,07 Gigyf2                | PSR0100006859.mm.1         | -2,68 | 0,009789 | 0,417839 Alternative 5' Donc | 0,1  |
| TC0100001617.mm.1 | -1,97 Tagln2               | PSR0100013485.mm.1         | 2,4   | 0,014977 | 0,452048 Cassette Exon       | 0,13 |
| TC1800001577.mm.1 | 1 Smad4                    | PSR1800011413.mm.1         | 2,4   | 0,006971 | 0,395722 Cassette Exon       | 0,11 |
| TC0500000669.mm.1 | -1,65                      | PSR0500005905.mm.1         | 2,4   | 0,010916 | 0,424696 Cassette Exon       | 0,06 |
| TC0200002477.mm.1 | -1,15 lft52                | JUC0200010279.mm.1         | 2,4   | 0,01107  | 0,425887                     |      |
| TC1200001251.mm.1 | -1,28                      | JUC1200004888.mm.1         | 2,4   | 0,036426 | 0,530958                     |      |
| TC1300002437.mm.1 | -1,18 Bhmt2                | JUC1300008600.mm.1         | 2,4   | 0,000223 | 0,28803                      |      |
| TC1700002573.mm.1 | 1,23 Atl2                  | JUC1700012655.mm.1         | 2,4   | 0,022966 | 0,488789                     |      |
| TC0100002602.mm.1 | -1,19 Atg9a                | JUC0100011971.mm.1         | 2,4   | 0,010588 | 0,42255                      |      |
| TC0100002602.mm.1 | -1,19 Atg9a                | JUC0100011982.mm.1         | 2,23  | 0,029811 | 0,511132                     |      |
| TC1700001738.mm.1 | 1,25 Grm4                  | JUC1700008626.mm.1         | 2,4   | 0,002997 | 0,353111                     |      |
| TC1700001738.mm.1 | 1,25 Grm4                  | JUC1700008629.mm.1         | -3,67 | 0,031127 | 0,515475                     |      |
| TC0200001448.mm.1 | -1,67 Trp53i11             | JUC0200005614.mm.1         | 2,4   | 0,040124 | 0,541532                     |      |

|                   |                              |                     |        |          |                              |      |
|-------------------|------------------------------|---------------------|--------|----------|------------------------------|------|
| TC0200002421.mm.1 | 1,21 Rprd1b                  | JUC0200009932.mm.1  | 2,4    | 0,033108 | 0,521786                     |      |
| TC0900001474.mm.1 | -1,39 Prss50                 | JUC0900006890.mm.1  | 2,4    | 0,002532 | 0,349501                     |      |
| TC0500001548.mm.1 | 1,22 Gtf2ird2                | JUC0500007622.mm.1  | 2,4    | 0,029091 | 0,509063                     |      |
| TC0600002250.mm.1 | -1,55 Osbpl3                 | JUC0600009273.mm.1  | 2,4    | 0,011681 | 0,429939                     |      |
| TC0600003328.mm.1 | -1,47                        | JUC0600013600.mm.1  | 2,4    | 0,010821 | 0,424068                     |      |
| TC0700002850.mm.1 | -1,52 C230052112Rik          | JUC0700013623.mm.1  | 2,4    | 0,026005 | 0,499257                     |      |
| TC0700003581.mm.1 | 1,22 Idh2                    | JUC0700015955.mm.1  | 2,4    | 0,023326 | 0,490065                     |      |
| TC0700003581.mm.1 | 1,22 Idh2                    | JUC0700015949.mm.1  | -2,12  | 0,01995  | 0,476079                     |      |
| TC0700001363.mm.1 | -1,34 Gdpd4                  | JUC0700005985.mm.1  | 2,4    | 0,025387 | 0,497403                     |      |
| TC1100001887.mm.1 | -1,67 Tmem104                | JUC1100009205.mm.1  | 2,4    | 0,049894 | 0,563773                     |      |
| TC0900002745.mm.1 | 13,62 Impg1                  | JUC0900012705.mm.1  | 2,39   | 0,038062 | 0,535633                     |      |
| TC0900002745.mm.1 | 13,62 Impg1                  | JUC0900012709.mm.1  | -2,35  | 0,003292 | 0,354243                     |      |
| TC0900002745.mm.1 | 13,62 Impg1                  | JUC0900012708.mm.1  | -2,99  | 0,003019 | 0,353447                     |      |
| TC0900002745.mm.1 | 13,62 Impg1                  | PSR0900022713.mm.1  | -4,95  | 0,023297 | 0,49004 Cassette Exon        | 0,41 |
| TC0900002745.mm.1 | 13,62 Impg1                  | JUC0900012706.mm.1  | -6,68  | 0,001197 | 0,321568                     |      |
| TC0900002745.mm.1 | 13,62 Impg1                  | JUC0900012720.mm.1  | -7,18  | 0,004228 | 0,363295                     |      |
| TC0900002745.mm.1 | 13,62 Impg1                  | PSR0900022730.mm.1  | -11,49 | 0,004157 | 0,3623 Alternative 5' Donc   | 0,47 |
| TC0500003399.mm.1 | -1,5 Ccl24                   | JUC0500016732.mm.1  | 2,39   | 0,025293 | 0,497226                     |      |
| TC0500003399.mm.1 | -1,5 Ccl24                   | PSR0500030728.mm.1  | 2,34   | 0,003968 | 0,360063 Intron Retention    | 0,29 |
| TC0300000923.mm.1 | 1,11 Otud7b                  | PSR0300007371.mm.1  | 2,39   | 0,017922 | 0,466466 Alternative 5' Donc | 0,22 |
| TC0300000923.mm.1 | 1,11 Otud7b                  | JUC0300003812.mm.1  | -4,15  | 0,004275 | 0,363868                     |      |
| TC0800000366.mm.1 | 1,3 Dusp26                   | PSR0800002796.mm.1  | 2,39   | 0,011339 | 0,427345 Alternative 5' Donc | 0,22 |
| TC1100000926.mm.1 | -1,57 Plscr3                 | PSR1100007899.mm.1  | 2,39   | 0,038858 | 0,537834 Alternative 5' Donc | 0,22 |
| TC1100000926.mm.1 | -1,57 Plscr3                 | PSR1100007884.mm.1  | 2,02   | 0,026951 | 0,502779 Cassette Exon       | 0,11 |
| TC1100003923.mm.1 | -1,38 Icam2                  | PSR11000036768.mm.1 | 2,39   | 0,041287 | 0,544179 Alternative 5' Donc | 0,22 |
| TC1800001060.mm.1 | -1,42 Klhl14                 | PSR1800007814.mm.1  | 2,39   | 0,01119  | 0,426444 Alternative 5' Donc | 0,22 |
| TC1000000267.mm.1 | -2,16                        | PSR1000001839.mm.1  | 2,39   | 0,045405 | 0,554085 Alternative 3' Acce | 0,22 |
| TC0X00002427.mm.1 | -2,2 Trex2                   | PSR0X00015003.mm.1  | 2,39   | 0,020896 | 0,479701 Cassette Exon       | 0,13 |
| TC1400002332.mm.1 | -1,16 9930012K11Rik          | JUC1400009953.mm.1  | 2,39   | 0,006281 | 0,388863                     |      |
| TC1300001737.mm.1 | -1,02 Exoc2                  | JUC1300005507.mm.1  | 2,39   | 0,033724 | 0,523549                     |      |
| TC1300001737.mm.1 | -1,02 Exoc2                  | JUC1300005517.mm.1  | 2,15   | 0,012252 | 0,433767                     |      |
| TC1300000746.mm.1 | 1,05 Zfp808; BC052688; Gm199 | JUC1300002600.mm.1  | 2,39   | 0,020997 | 0,480143                     |      |
| TC1800000396.mm.1 | 1,18 Rnf14                   | JUC1800001650.mm.1  | 2,39   | 0,006542 | 0,391994                     |      |
| TC1700001877.mm.1 | -1,79 Angptl4                | JUC1700009376.mm.1  | 2,39   | 0,048796 | 0,561497                     |      |
| TC0100000535.mm.1 | 1,18 Creb1                   | JUC0100002522.mm.1  | 2,39   | 0,00752  | 0,401141                     |      |
| TC0200001452.mm.1 | -1,37 Gm10804                | JUC0200005623.mm.1  | 2,39   | 0,021499 | 0,482708                     |      |
| TC0500000513.mm.1 | -1,56                        | JUC0500002672.mm.1  | 2,39   | 0,022619 | 0,487464                     |      |
| TC0600001733.mm.1 | -1,28 Fgfr1op2               | JUC0600007185.mm.1  | 2,39   | 0,003493 | 0,355638                     |      |
| TC0600001733.mm.1 | -1,28 Fgfr1op2               | JUC0600007180.mm.1  | 2,3    | 0,025014 | 0,496061                     |      |
| TC0600001354.mm.1 | -1,02 Slc25a18               | JUC0600005627.mm.1  | 2,39   | 0,003535 | 0,3562                       |      |
| TC0700003439.mm.1 | 1,13 Asb7                    | JUC0700015495.mm.1  | 2,39   | 0,013446 | 0,442693                     |      |
| TC0400000438.mm.1 | -1,51 Car9                   | JUC0400001453.mm.1  | 2,39   | 0,007243 | 0,39826                      |      |
| TC1000002892.mm.1 | -1,08 Tph2                   | JUC1000011995.mm.1  | 2,39   | 0,00863  | 0,408463                     |      |
| TC1100002680.mm.1 | 1,86 Zfp879                  | JUC1100012684.mm.1  | 2,39   | 0,040529 | 0,542404                     |      |
| TC1100001646.mm.1 | -1,18 Wnk4                   | JUC1100007999.mm.1  | 2,39   | 0,024165 | 0,493245                     |      |
| TC1000000145.mm.1 | -1,53 Il20ra                 | JUC1000000514.mm.1  | 2,39   | 0,046178 | 0,555838                     |      |
| TC1400001524.mm.1 | 2,19 Gng2                    | JUC1400006097.mm.1  | 2,38   | 0,017934 | 0,466474                     |      |
| TC1400001524.mm.1 | 2,19 Gng2                    | PSR1400011349.mm.1  | -2,01  | 0,048711 | 0,561355                     |      |

|                   |                              |                    |       |          |                              |      |
|-------------------|------------------------------|--------------------|-------|----------|------------------------------|------|
| TC1400001524.mm.1 | 2,19 Gng2                    | PSR1400011347.mm.1 | -2,24 | 0,040253 | 0,541756 Cassette Exon       | 0,07 |
| TC1400001524.mm.1 | 2,19 Gng2                    | PSR1400011351.mm.1 | -2,96 | 0,003563 | 0,356223 Alternative 5' Donc | 0,28 |
| TC1400001524.mm.1 | 2,19 Gng2                    | PSR1400011352.mm.1 | -3,18 | 0,017846 | 0,466209 Alternative 5' Donc | 0,28 |
| TC1400001524.mm.1 | 2,19 Gng2                    | PSR1400011355.mm.1 | -3,49 | 0,01691  | 0,460797 Alternative 5' Donc | 0,28 |
| TC1400001524.mm.1 | 2,19 Gng2                    | JUC1400006105.mm.1 | -3,54 | 0,003666 | 0,357266                     |      |
| TC1400001524.mm.1 | 2,19 Gng2                    | PSR1400011353.mm.1 | -4,35 | 0,002925 | 0,352289 Alternative 5' Donc | 0,28 |
| TC0900002462.mm.1 | -2,07                        | PSR0900020599.mm.1 | 2,38  | 0,011701 | 0,429969 Alternative 3' Acce | 0,22 |
| TC0900003332.mm.1 | -1 Mthfs                     | PSR0900008987.mm.1 | 2,38  | 0,033004 | 0,521478 Alternative 5' Donc | 0,21 |
| TC0900003332.mm.1 | -1 Mthfs                     | JUC0900004891.mm.1 | -2,08 | 0,039018 | 0,538105                     |      |
| TC1900000572.mm.1 | -1,62 Entpd1                 | JUC1900002777.mm.1 | 2,38  | 0,005394 | 0,378916                     |      |
| TC1900000572.mm.1 | -1,62 Entpd1                 | PSR1900005214.mm.1 | 2,22  | 0,037307 | 0,533573 Alternative 5' Donc | 0,18 |
| TC1900000402.mm.1 | 1,25 Kank1                   | PSR1900003714.mm.1 | 2,38  | 0,031963 | 0,518173 Cassette Exon       | 0,17 |
| TC1600000221.mm.1 | -1,34 Smpd4                  | PSR1600001911.mm.1 | 2,38  | 0,048814 | 0,561539 Cassette Exon       | 0,15 |
| TC0X00003043.mm.1 | -1,4 Slc25a53                | PSR0X00019073.mm.1 | 2,38  | 0,001854 | 0,337479 Cassette Exon       | 0,13 |
| TC1000002330.mm.1 | -3,18 1700040L02Rik          | PSR1000016615.mm.1 | 2,38  | 0,010875 | 0,424174 Cassette Exon       | 0,13 |
| TC0200003122.mm.1 | -1,57 Arrdc1                 | JUC0200012984.mm.1 | 2,38  | 0,01808  | 0,46716                      |      |
| TC1400000999.mm.1 | 1,68 Lgi3                    | JUC1400004304.mm.1 | 2,38  | 0,038526 | 0,536634                     |      |
| TC0200002653.mm.1 | -1,23                        | JUC0200010999.mm.1 | 2,38  | 0,045208 | 0,553564                     |      |
| TC1400002057.mm.1 | 1,19 Prmt5                   | JUC1400008432.mm.1 | 2,38  | 0,028348 | 0,506843                     |      |
| TC1400002864.mm.1 | -1,27 Tm9sf1                 | JUC1400008749.mm.1 | 2,38  | 0,031729 | 0,517489                     |      |
| TC0100002305.mm.1 | -1,57 Nabp1                  | JUC0100010484.mm.1 | 2,38  | 0,003009 | 0,353447                     |      |
| TC0200002315.mm.1 | 1,09 Asxl1                   | JUC0200009156.mm.1 | 2,38  | 0,011364 | 0,427452                     |      |
| TC0200002371.mm.1 | -1,11 Gm14256; 0610038P03Rik | JUC0200009565.mm.1 | 2,38  | 0,006297 | 0,389033                     |      |
| TC1600000977.mm.1 | -1,68                        | JUC1600003958.mm.1 | 2,38  | 0,035588 | 0,528831                     |      |
| TC0700001122.mm.1 | -1,45 Fanci                  | JUC0700005067.mm.1 | 2,38  | 0,001618 | 0,332831                     |      |
| TC0700001122.mm.1 | -1,45 Fanci                  | JUC0700005083.mm.1 | -7,52 | 0,002726 | 0,349612                     |      |
| TC0500003585.mm.1 | -1,14 Smurf1                 | JUC0500017876.mm.1 | 2,38  | 0,000584 | 0,304044                     |      |
| TC0400000051.mm.1 | -1,39                        | JUC0400000145.mm.1 | 2,38  | 0,041513 | 0,544746                     |      |
| TC1000002000.mm.1 | -1,18 Nt5dc1                 | JUC1000007752.mm.1 | 2,38  | 0,029882 | 0,51129                      |      |
| TC0800003169.mm.1 | 1,92 Pgbd5                   | JUC0800013287.mm.1 | 2,37  | 0,029981 | 0,51153                      |      |
| TC0800003169.mm.1 | 1,92 Pgbd5                   | JUC0800013286.mm.1 | 2,29  | 0,02336  | 0,490143                     |      |
| TC0800003169.mm.1 | 1,92 Pgbd5                   | PSR0800024342.mm.1 | -2,07 | 0,016152 | 0,457969 Cassette Exon       | 0,1  |
| TC0800003169.mm.1 | 1,92 Pgbd5                   | PSR0800024330.mm.1 | -2,17 | 0,019628 | 0,474852 Cassette Exon       | 0,08 |
| TC0800003169.mm.1 | 1,92 Pgbd5                   | PSR0800024334.mm.1 | -2,26 | 0,011459 | 0,427962 Cassette Exon       | 0,05 |
| TC0800003169.mm.1 | 1,92 Pgbd5                   | PSR0800024333.mm.1 | -2,96 | 0,004108 | 0,36228 Cassette Exon        | 0,19 |
| TC0800003169.mm.1 | 1,92 Pgbd5                   | PSR0800024332.mm.1 | -3,29 | 0,000975 | 0,314364 Alternative 5' Donc | 0,34 |
| TC0800003169.mm.1 | 1,92 Pgbd5                   | JUC0800013290.mm.1 | -3,36 | 0,002637 | 0,349612                     |      |
| TC0100001438.mm.1 | 1,92 Astn1                   | JUC0100006753.mm.1 | 2,37  | 0,002349 | 0,34761                      |      |
| TC0100001438.mm.1 | 1,92 Astn1                   | PSR0100011777.mm.1 | -2,02 | 0,000926 | 0,313363 Cassette Exon       | 0,13 |
| TC0100001438.mm.1 | 1,92 Astn1                   | JUC0100006774.mm.1 | -2,04 | 0,006686 | 0,393201                     |      |
| TC0100001438.mm.1 | 1,92 Astn1                   | PSR0100011766.mm.1 | -2,26 | 0,004673 | 0,370181 Cassette Exon       | 0,25 |
| TC0100001438.mm.1 | 1,92 Astn1                   | PSR0100011779.mm.1 | -2,37 | 0,010421 | 0,42148 Cassette Exon        | 0,15 |
| TC0100001438.mm.1 | 1,92 Astn1                   | JUC0100006761.mm.1 | -2,38 | 0,032653 | 0,520431                     |      |
| TC0100001438.mm.1 | 1,92 Astn1                   | PSR0100011761.mm.1 | -2,43 | 0,006366 | 0,389469 Alternative 3' Acce | 0,2  |
| TC0100001438.mm.1 | 1,92 Astn1                   | PSR0100011760.mm.1 | -2,44 | 0,01554  | 0,454617 Alternative 3' Acce | 0,2  |
| TC0100001438.mm.1 | 1,92 Astn1                   | JUC0100006772.mm.1 | -2,68 | 0,005309 | 0,378059                     |      |
| TC0100001438.mm.1 | 1,92 Astn1                   | PSR0100011786.mm.1 | -3,67 | 0,023183 | 0,490016 Cassette Exon       | 0,3  |
| TC0100001438.mm.1 | 1,92 Astn1                   | JUC0100006754.mm.1 | -4,5  | 0,001254 | 0,322251                     |      |



|                   |                               |                    |       |          |                              |      |
|-------------------|-------------------------------|--------------------|-------|----------|------------------------------|------|
| TC1900001767.mm.1 | -1,07 Slc22a29                | PSR1900009907.mm.1 | 2,37  | 0,028265 | 0,506588 Cassette Exon       | 0,16 |
| TC1900001767.mm.1 | -1,07 Slc22a29                | PSR1900009910.mm.1 | -2,18 | 0,03009  | 0,511932 Intron Retention    | 0,29 |
| TC0400001944.mm.1 | 1,07 A930028C08Rik; Ube4bos   | PSR0400015988.mm.1 | 2,37  | 0,021831 | 0,484607 Cassette Exon       | 0,22 |
| TC1700001933.mm.1 | -1,46 1110038B12Rik; Snord52; | PSR1700018307.mm.1 | 2,37  | 0,029784 | 0,511132 Alternative 3' Acce | 0,22 |
| TC1600000620.mm.1 | -1,2 BC002163                 | PSR1600005559.mm.1 | 2,37  | 0,031296 | 0,516173 Alternative 3' Acce | 0,22 |
| TC0800003208.mm.1 | -1,03                         | PSR0800024662.mm.1 | 2,37  | 0,000539 | 0,304044 Alternative 3' Acce | 0,2  |
| TC0500000876.mm.1 | -1,07 Fam47e                  | PSR0500007623.mm.1 | 2,37  | 0,019668 | 0,474887 Alternative 5' Donc | 0,17 |
| TC0600002381.mm.1 | -1,37 Fam13a                  | PSR0600018448.mm.1 | 2,37  | 0,004462 | 0,36753 Cassette Exon        | 0,11 |
| TC0600002381.mm.1 | -1,37 Fam13a                  | PSR0600018452.mm.1 | 2,17  | 0,031533 | 0,51704 Alternative 5' Donc  | 0,14 |
| TC0600002381.mm.1 | -1,37 Fam13a                  | JUC0600009612.mm.1 | 2,12  | 0,001365 | 0,32572                      |      |
| TC1100001809.mm.1 | -1,05 Gm11657                 | PSR1100017050.mm.1 | 2,37  | 0,041726 | 0,545379 Cassette Exon       | 0,14 |
| TC0300001488.mm.1 | -1,93 Mcoln3                  | PSR0300012013.mm.1 | 2,37  | 0,020797 | 0,479489 Cassette Exon       | 0,12 |
| TC0400001329.mm.1 | -1,12 Lepre1                  | PSR0400010063.mm.1 | 2,37  | 0,013973 | 0,446239 Cassette Exon       | 0,12 |
| TC0900001644.mm.1 | -1,73 Topaz1                  | PSR0900013781.mm.1 | 2,37  | 0,040436 | 0,542058 Cassette Exon       | 0,07 |
| TC1400002206.mm.1 | -1,18 Gucy1b2                 | JUC1400009337.mm.1 | 2,37  | 0,009038 | 0,412748                     |      |
| TC1200000978.mm.1 | 1,53 Ttc8                     | JUC1200003799.mm.1 | 2,37  | 0,045603 | 0,55464                      |      |
| TC1200000978.mm.1 | 1,53 Ttc8                     | JUC1200003804.mm.1 | -2,31 | 0,020452 | 0,478018                     |      |
| TC0300001038.mm.1 | 1,45 Sike1                    | JUC0300004295.mm.1 | 2,37  | 0,029915 | 0,511499                     |      |
| TC1200000411.mm.1 | -1,4                          | JUC1200001603.mm.1 | 2,37  | 0,013396 | 0,442454                     |      |
| TC0200004362.mm.1 | -1,11 4930533B01Rik           | JUC0200018654.mm.1 | 2,37  | 0,004015 | 0,361291                     |      |
| TC1200002127.mm.1 | 1,08 Snw1                     | JUC1200008167.mm.1 | 2,37  | 0,027936 | 0,505612                     |      |
| TC1700002273.mm.1 | -1,1                          | JUC1700011366.mm.1 | 2,37  | 0,020935 | 0,479947                     |      |
| TC1700000535.mm.1 | 1,11 Pde9a                    | JUC1700002704.mm.1 | 2,37  | 0,047269 | 0,558223                     |      |
| TC0500002731.mm.1 | -1,26 Rassf6                  | JUC0500013125.mm.1 | 2,37  | 0,026461 | 0,501252                     |      |
| TC0600001095.mm.1 | 1 Fgd5                        | JUC0600004396.mm.1 | 2,37  | 0,039703 | 0,540417                     |      |
| TC0600001095.mm.1 | 1 Fgd5                        | JUC0600004387.mm.1 | 2,25  | 0,021352 | 0,481836                     |      |
| TC0600002342.mm.1 | -1,17 Nt5c3                   | JUC0600009562.mm.1 | 2,37  | 0,000834 | 0,311886                     |      |
| TC0700002373.mm.1 | -1,07 Sult2a4                 | JUC0700011213.mm.1 | 2,37  | 0,026723 | 0,502096                     |      |
| TC1100000211.mm.1 | 1,02 Vps54                    | JUC1100000902.mm.1 | 2,37  | 0,005268 | 0,378003                     |      |
| TC1000000051.mm.1 | -1,67 B430219N15Rik           | JUC1000000220.mm.1 | 2,37  | 0,033059 | 0,521637                     |      |
| TC0200001524.mm.1 | 3,32 Slc1a2                   | PSR0200011453.mm.1 | 2,36  | 0,001982 | 0,341091 Cassette Exon       | 0,03 |
| TC0200001524.mm.1 | 3,32 Slc1a2                   | PSR0200011465.mm.1 | 2,22  | 0,001333 | 0,325349                     |      |
| TC0200001524.mm.1 | 3,32 Slc1a2                   | JUC0200005718.mm.1 | 2,03  | 0,034661 | 0,526274                     |      |
| TC0200001524.mm.1 | 3,32 Slc1a2                   | PSR0200011447.mm.1 | -2,29 | 0,010577 | 0,422452 Cassette Exon       | 0,38 |
| TC0200001524.mm.1 | 3,32 Slc1a2                   | PSR0200011437.mm.1 | -2,88 | 0,009071 | 0,412827 Cassette Exon       | 0,44 |
| TC0200001524.mm.1 | 3,32 Slc1a2                   | JUC0200005716.mm.1 | -3,8  | 0,002554 | 0,349501                     |      |
| TC0200001524.mm.1 | 3,32 Slc1a2                   | PSR0200011448.mm.1 | -3,84 | 0,005554 | 0,380773 Cassette Exon       | 0,37 |
| TC0200001524.mm.1 | 3,32 Slc1a2                   | PSR0200011436.mm.1 | -3,92 | 0,000765 | 0,308403 Cassette Exon       | 0,44 |
| TC0200001524.mm.1 | 3,32 Slc1a2                   | PSR0200011441.mm.1 | -4,27 | 0,012453 | 0,43528 Cassette Exon        | 0,44 |
| TC0200001524.mm.1 | 3,32 Slc1a2                   | JUC0200005727.mm.1 | -5,08 | 0,008477 | 0,406791                     |      |
| TC0200001524.mm.1 | 3,32 Slc1a2                   | PSR0200011431.mm.1 | -5,3  | 0,005632 | 0,381532 Cassette Exon       | 0,28 |
| TC0200001524.mm.1 | 3,32 Slc1a2                   | PSR0200011443.mm.1 | -6,26 | 0,000553 | 0,304044 Cassette Exon       | 0,44 |
| TC0200001524.mm.1 | 3,32 Slc1a2                   | JUC0200005739.mm.1 | -6,6  | 0,020146 | 0,477043                     |      |
| TC0200001524.mm.1 | 3,32 Slc1a2                   | JUC0200005720.mm.1 | -6,8  | 0,002195 | 0,344814                     |      |
| TC0200001524.mm.1 | 3,32 Slc1a2                   | PSR0200011439.mm.1 | -6,96 | 0,001118 | 0,317328 Cassette Exon       | 0,44 |
| TC0200001524.mm.1 | 3,32 Slc1a2                   | PSR0200011438.mm.1 | -7,59 | 0,00182  | 0,336896 Cassette Exon       | 0,44 |
| TC0200001524.mm.1 | 3,32 Slc1a2                   | JUC0200005736.mm.1 | -8,66 | 0,014229 | 0,447947                     |      |
| TC0200001524.mm.1 | 3,32 Slc1a2                   | JUC0200005735.mm.1 | -8,67 | 0,011492 | 0,42815                      |      |

|                   |                                                  |                    |        |          |                              |      |
|-------------------|--------------------------------------------------|--------------------|--------|----------|------------------------------|------|
| TC0200001524.mm.1 | 3,32 Slc1a2                                      | JUC0200005730.mm.1 | -9,84  | 0,003512 | 0,355749                     |      |
| TC0200001524.mm.1 | 3,32 Slc1a2                                      | JUC0200005722.mm.1 | -13,04 | 0,000015 | 0,18968                      |      |
| TC0200001524.mm.1 | 3,32 Slc1a2                                      | JUC0200005734.mm.1 | -15,82 | 0,001291 | 0,322541                     |      |
| TC0100003739.mm.1 | -1,45 Marc2                                      | PSR0100030639.mm.1 | 2,36   | 0,045404 | 0,554085 Alternative 3' Acce | 0,22 |
| TC0100003739.mm.1 | -1,45 Marc2                                      | PSR0100030635.mm.1 | 2,16   | 0,011727 | 0,429969 Cassette Exon       | 0,12 |
| TC0400000346.mm.1 | 1,7 Tmem215                                      | PSR0400002109.mm.1 | 2,36   | 0,000003 | 0,229631 Alternative 5' Donc | 0,22 |
| TC1500001760.mm.1 | -1,17 Scrib                                      | PSR1500013351.mm.1 | 2,36   | 0,030801 | 0,514144 Alternative 5' Donc | 0,2  |
| TC1500001760.mm.1 | -1,17 Scrib                                      | JUC1500007591.mm.1 | 2,2    | 0,025341 | 0,497329                     |      |
| TC0400001569.mm.1 | 1,1 Mecr                                         | PSR0400012330.mm.1 | 2,36   | 0,009534 | 0,416602 Alternative 3' Acce | 0,18 |
| TC1300000460.mm.1 | -1,37 Gcnt2                                      | PSR1300002716.mm.1 | 2,36   | 0,026734 | 0,502096 Cassette Exon       | 0,14 |
| TC1200001520.mm.1 | -1,01 Gm20474                                    | JUC1200005859.mm.1 | 2,36   | 0,044396 | 0,551441                     |      |
| TC1200001520.mm.1 | -1,01 Gm20474                                    | PSR1200010611.mm.1 | 2,1    | 0,015151 | 0,452699 Cassette Exon       | 0,13 |
| TC1200001520.mm.1 | -1,01 Gm20474                                    | JUC1200005856.mm.1 | 2,06   | 0,015882 | 0,456526                     |      |
| TC0600000025.mm.1 | -1,36 Asb4                                       | PSR0600000267.mm.1 | 2,36   | 0,03094  | 0,514624 Cassette Exon       | 0,12 |
| TC0600000025.mm.1 | -1,36 Asb4                                       | JUC0600000164.mm.1 | -2,53  | 0,017051 | 0,461826                     |      |
| TC0900001785.mm.1 | -1,62 4931406C07Rik                              | PSR0900014986.mm.1 | 2,36   | 0,048753 | 0,561437 Cassette Exon       | 0,12 |
| TC1200001686.mm.1 | -1,06 Stxbp6                                     | JUC1200006462.mm.1 | 2,36   | 0,044698 | 0,552206                     |      |
| TC0200003699.mm.1 | 1,12 Lrp2                                        | JUC0200016154.mm.1 | 2,36   | 0,035477 | 0,528724                     |      |
| TC0200003699.mm.1 | 1,12 Lrp2                                        | JUC0200016177.mm.1 | 2,03   | 0,009036 | 0,412748                     |      |
| TC0100003889.mm.1 | -1,55 Mnda                                       | JUC0100016782.mm.1 | 2,36   | 0,049318 | 0,56273                      |      |
| TC1700000110.mm.1 | 1,19 Park2                                       | JUC1700000487.mm.1 | 2,36   | 0,005536 | 0,380557                     |      |
| TC0100003507.mm.1 | 1,28 Uap1                                        | JUC0100016350.mm.1 | 2,36   | 0,049734 | 0,563552                     |      |
| TC1600001624.mm.1 | 1,04 Gap43                                       | JUC1600006883.mm.1 | 2,36   | 0,023529 | 0,490947                     |      |
| TC0800001103.mm.1 | -1,16 Slc12a3                                    | JUC0800004525.mm.1 | 2,36   | 0,014498 | 0,449528                     |      |
| TC0900001299.mm.1 | 2,84 Rab6b                                       | JUC0900005545.mm.1 | 2,36   | 0,033273 | 0,522325                     |      |
| TC0900001299.mm.1 | 2,84 Rab6b                                       | JUC0900005550.mm.1 | -2,21  | 0,008266 | 0,405976                     |      |
| TC0500001470.mm.1 | -1,25                                            | JUC0500007303.mm.1 | 2,36   | 0,017769 | 0,465467                     |      |
| TC0700000016.mm.1 | -1,45 Cnot3; Mir3572                             | JUC0700000079.mm.1 | 2,36   | 0,04045  | 0,542094                     |      |
| TC0700001174.mm.1 | -1,07 Whamm                                      | JUC0700005341.mm.1 | 2,36   | 0,045482 | 0,554313                     |      |
| TC0600002975.mm.1 | -1,11 Alox5                                      | JUC0600011886.mm.1 | 2,36   | 0,047323 | 0,558291                     |      |
| TC0700002001.mm.1 | -1,54 Prap1                                      | JUC0700009343.mm.1 | 2,36   | 0,041874 | 0,545696                     |      |
| TC0700002102.mm.1 | -1,27 Dhcr7                                      | JUC0700010064.mm.1 | 2,36   | 0,013578 | 0,443703                     |      |
| TC0300002800.mm.1 | -1,31 Slc30a7                                    | JUC0300011486.mm.1 | 2,36   | 0,031091 | 0,515208                     |      |
| TC0300002800.mm.1 | -1,31 Slc30a7                                    | JUC0300011487.mm.1 | 2,07   | 0,039849 | 0,540922                     |      |
| TC0400000873.mm.1 | 1,23 Acer2                                       | JUC0400003039.mm.1 | 2,36   | 0,002645 | 0,349612                     |      |
| TC0400002762.mm.1 | -1,16 Inip                                       | JUC0400011657.mm.1 | 2,36   | 0,015876 | 0,456526                     |      |
| TC0100003241.mm.1 | -1,23 Hmcn1                                      | PSR0100026324.mm.1 | 2,35   | 0,020801 | 0,479493 Cassette Exon       | 0,02 |
| TC0100003241.mm.1 | -1,23 Hmcn1                                      | JUC0100014959.mm.1 | 2,3    | 0,034491 | 0,525929                     |      |
| TC0100003241.mm.1 | -1,23 Hmcn1                                      | JUC0100014945.mm.1 | 2,14   | 0,023743 | 0,491602                     |      |
| TC0100003241.mm.1 | -1,23 Hmcn1                                      | PSR0100026311.mm.1 | -2,23  | 0,002235 | 0,34578 Cassette Exon        | 0,13 |
| TC0100003241.mm.1 | -1,23 Hmcn1                                      | PSR0100026306.mm.1 | -3,05  | 0,040124 | 0,541532 Cassette Exon       | 0,29 |
| TC0100003241.mm.1 | -1,23 Hmcn1                                      | JUC0100014995.mm.1 | -3,09  | 0,030577 | 0,513415                     |      |
| TC1400000772.mm.1 | 2,64 Thtpa; Zfhx2os; Gm20687; PSR1400006023.mm.1 |                    | 2,35   | 0,000521 | 0,303623 Alternative 3' Acce | 0,22 |
| TC1400000772.mm.1 | 2,64 Thtpa; Zfhx2os; Gm20687; PSR1400006026.mm.1 |                    | -2,14  | 0,019091 | 0,47221 Alternative 5' Donc  | 0,02 |
| TC1400000772.mm.1 | 2,64 Thtpa; Zfhx2os; Gm20687; JUC1400003202.mm.1 |                    | -2,16  | 0,048222 | 0,560225                     |      |
| TC1400000772.mm.1 | 2,64 Thtpa; Zfhx2os; Gm20687; PSR1400006018.mm.1 |                    | -2,2   | 0,001733 | 0,335996 Cassette Exon       | 0,19 |
| TC1400000772.mm.1 | 2,64 Thtpa; Zfhx2os; Gm20687; PSR1400006019.mm.1 |                    | -2,27  | 0,000414 | 0,297771 Cassette Exon       | 0,19 |
| TC1400000772.mm.1 | 2,64 Thtpa; Zfhx2os; Gm20687; PSR1400006024.mm.1 |                    | -2,35  | 0,000521 | 0,303623                     |      |

|                   |       |                                             |       |          |          |                     |      |
|-------------------|-------|---------------------------------------------|-------|----------|----------|---------------------|------|
| TC1400000772.mm.1 | 2,64  | Thtpa; Zfhx2os; Gm20687; PSR1400006012.mm.1 | -2,38 | 0,027591 | 0,504485 | Cassette Exon       | 0,13 |
| TC1400000772.mm.1 | 2,64  | Thtpa; Zfhx2os; Gm20687; PSR1400006036.mm.1 | -2,51 | 0,002969 | 0,352501 | Alternative 3' Acce | 0,21 |
| TC1400000772.mm.1 | 2,64  | Thtpa; Zfhx2os; Gm20687; PSR1400006039.mm.1 | -2,61 | 0,000221 | 0,28803  | Alternative 3' Acce | 0,21 |
| TC1400000772.mm.1 | 2,64  | Thtpa; Zfhx2os; Gm20687; PSR1400006028.mm.1 | -2,67 | 0,000153 | 0,272178 | Cassette Exon       | 0,23 |
| TC1400000772.mm.1 | 2,64  | Thtpa; Zfhx2os; Gm20687; PSR1400006037.mm.1 | -2,69 | 0,003154 | 0,353892 | Alternative 3' Acce | 0,21 |
| TC1400000772.mm.1 | 2,64  | Thtpa; Zfhx2os; Gm20687; PSR1400006027.mm.1 | -2,72 | 0,010947 | 0,425002 | Alternative 5' Donc | 0,08 |
| TC1400000772.mm.1 | 2,64  | Thtpa; Zfhx2os; Gm20687; PSR1400006038.mm.1 | -3,07 | 0,002326 | 0,346856 | Cassette Exon       | 0,25 |
| TC1400000772.mm.1 | 2,64  | Thtpa; Zfhx2os; Gm20687; PSR1400006022.mm.1 | -3,4  | 0,005886 | 0,383835 | Cassette Exon       | 0,18 |
| TC1400000772.mm.1 | 2,64  | Thtpa; Zfhx2os; Gm20687; PSR1400006015.mm.1 | -3,61 | 0,001162 | 0,332831 | Cassette Exon       | 0,29 |
| TC1400000772.mm.1 | 2,64  | Thtpa; Zfhx2os; Gm20687; JUC1400003217.mm.1 | -4,14 | 0,026544 | 0,501435 |                     |      |
| TC0100001585.mm.1 | 1,17  | Dedd PSR0100013030.mm.1                     | 2,35  | 0,002475 | 0,349135 | Cassette Exon       | 0,17 |
| TC0800001076.mm.1 | 1,05  | Irx6 PSR0800008263.mm.1                     | 2,35  | 0,020108 | 0,47686  | Cassette Exon       | 0,17 |
| TC0900001431.mm.1 | -1,69 | Shisa5 PSR0900011828.mm.1                   | 2,35  | 0,038654 | 0,537102 | Alternative 3' Acce | 0,17 |
| TC0900001431.mm.1 | -1,69 | Shisa5 PSR0900011834.mm.1                   | 2,08  | 0,001266 | 0,322251 | Alternative 5' Donc | 0,16 |
| TC0900001431.mm.1 | -1,69 | Shisa5 PSR0900011810.mm.1                   | 2,05  | 0,030358 | 0,512923 | Alternative 3' Acce | 0,17 |
| TC0200003880.mm.1 | -1,79 | Serping1 PSR0200033581.mm.1                 | 2,35  | 0,034743 | 0,526574 | Alternative 5' Donc | 0,16 |
| TC0700001620.mm.1 | 1,39  | Ipo7; Snora23 PSR0700013430.mm.1            | 2,35  | 0,022379 | 0,486433 | Cassette Exon       | 0,15 |
| TC0X00000366.mm.1 | -1,05 | Gm7590 PSR0X00002492.mm.1                   | 2,35  | 0,040359 | 0,541949 | Cassette Exon       | 0,15 |
| TC0600002425.mm.1 | -1,31 | Il23r PSR0600018626.mm.1                    | 2,35  | 0,025395 | 0,497403 | Cassette Exon       | 0,14 |
| TC1900000733.mm.1 | -1,07 | Sorcs3 PSR1900006547.mm.1                   | 2,35  | 0,002538 | 0,349501 | Cassette Exon       | 0,13 |
| TC0100002308.mm.1 | 1,56  | Myo1b JUC0100010511.mm.1                    | 2,35  | 0,005176 | 0,376851 |                     |      |
| TC0100002308.mm.1 | 1,56  | Myo1b PSR0100018556.mm.1                    | 2,14  | 0,029372 | 0,509995 | Cassette Exon       | 0,12 |
| TC0100002308.mm.1 | 1,56  | Myo1b JUC0100010501.mm.1                    | -2,12 | 0,007034 | 0,39605  |                     |      |
| TC0500001225.mm.1 | -1,23 | Mvk PSR0500010514.mm.1                      | 2,35  | 0,045387 | 0,554078 | Cassette Exon       | 0,08 |
| TC0500001225.mm.1 | -1,23 | Mvk JUC0500005770.mm.1                      | 2,15  | 0,022532 | 0,487133 |                     |      |
| TC0200002530.mm.1 | 1,55  | Dnttip1 JUC0200010494.mm.1                  | 2,35  | 0,003411 | 0,355242 |                     |      |
| TC0200002530.mm.1 | 1,55  | Dnttip1 JUC0200010503.mm.1                  | -2,69 | 0,008894 | 0,410717 |                     |      |
| TC1200002299.mm.1 | 1,43  | Syne3 JUC1200008873.mm.1                    | 2,35  | 0,046054 | 0,555632 |                     |      |
| TC1200002299.mm.1 | 1,43  | Syne3 JUC1200008876.mm.1                    | 2,24  | 0,027353 | 0,503805 |                     |      |
| TC1700002502.mm.1 | 5,05  | BC027072 PSR1700022986.mm.1                 | 2,35  | 0,024531 | 0,493992 |                     |      |
| TC1700002502.mm.1 | 5,05  | BC027072 JUC1700012300.mm.1                 | -6,37 | 0,001717 | 0,335996 |                     |      |
| TC0100003253.mm.1 | -1,03 | Swt1 JUC0100015048.mm.1                     | 2,35  | 0,01419  | 0,447608 |                     |      |
| TC0100001703.mm.1 | 1,22  | Cdc42bpa JUC0100008006.mm.1                 | 2,35  | 0,037808 | 0,534767 |                     |      |
| TC0100001703.mm.1 | 1,22  | Cdc42bpa JUC0100007993.mm.1                 | 2,18  | 0,025158 | 0,496555 |                     |      |
| TC1600000088.mm.1 | 1,22  | Mettl22 JUC1600000291.mm.1                  | 2,35  | 0,00566  | 0,381922 |                     |      |
| TC0200002329.mm.1 | -1,21 | Bpifb3 JUC0200009273.mm.1                   | 2,35  | 0,012766 | 0,43712  |                     |      |
| TC1700002765.mm.1 | -1,32 | T2 JUC1700000397.mm.1                       | 2,35  | 0,007505 | 0,401045 |                     |      |
| TC1600000472.mm.1 | -1,25 | Slc12a8 JUC1600002331.mm.1                  | 2,35  | 0,004777 | 0,371044 |                     |      |
| TC0200000461.mm.1 | -1,14 | Adamts13 JUC0200001457.mm.1                 | 2,35  | 0,033784 | 0,523756 |                     |      |
| TC0500002182.mm.1 | 1,42  | lft172 JUC0500010912.mm.1                   | 2,35  | 0,021517 | 0,48281  |                     |      |
| TC0500002895.mm.1 | -1,37 | Gbp10; Gbp6 JUC0500013947.mm.1              | 2,35  | 0,026534 | 0,501411 |                     |      |
| TC0700001398.mm.1 | -1,1  | Xrra1 JUC0700006133.mm.1                    | 2,35  | 0,033098 | 0,521753 |                     |      |
| TC0700002372.mm.1 | -1,17 | Sult2a1 JUC0700011210.mm.1                  | 2,35  | 0,030074 | 0,511908 |                     |      |
| TC0300002972.mm.1 | -1,85 | Npnt JUC0300012245.mm.1                     | 2,35  | 0,041716 | 0,545356 |                     |      |
| TC0300002972.mm.1 | -1,85 | Npnt JUC0300012237.mm.1                     | -2,06 | 0,023954 | 0,4926   |                     |      |
| TC0300003052.mm.1 | -1,14 | Gm15540 JUC0300012550.mm.1                  | 2,35  | 0,028498 | 0,507345 |                     |      |
| TC0300001984.mm.1 | -1,08 | Ufm1 JUC0300007915.mm.1                     | 2,35  | 0,018787 | 0,470789 |                     |      |
| TC0X00001367.mm.1 | 1,15  | Mum1l1 JUC0X00004214.mm.1                   | 2,35  | 0,044541 | 0,551915 |                     |      |

|                   |                          |                    |       |          |                              |      |
|-------------------|--------------------------|--------------------|-------|----------|------------------------------|------|
| TC1400001540.mm.1 | 1,43 Ppp3cb              | JUC1400006206.mm.1 | 2,34  | 0,002266 | 0,34578                      |      |
| TC1400001540.mm.1 | 1,43 Ppp3cb              | PSR1400011509.mm.1 | -3,41 | 0,005975 | 0,386028 Alternative 5' Donc | 0,39 |
| TC0400004055.mm.1 | -1,16 Spsb1              | JUC0400017588.mm.1 | 2,34  | 0,025167 | 0,496555                     |      |
| TC0400004055.mm.1 | -1,16 Spsb1              | PSR0400033723.mm.1 | -2,42 | 0,010589 | 0,42255 Alternative 5' Donc  | 0,29 |
| TC0600002742.mm.1 | 1,43 Zfyve20             | JUC0600011067.mm.1 | 2,34  | 0,007662 | 0,402377                     |      |
| TC0600002742.mm.1 | 1,43 Zfyve20             | PSR0600021340.mm.1 | -2,81 | 0,002179 | 0,344453 Alternative 5' Donc | 0,29 |
| TC0700003426.mm.1 | 2,33 Gm7546              | PSR0700029208.mm.1 | 2,34  | 0,012737 | 0,436709 Cassette Exon       | 0,12 |
| TC0700003426.mm.1 | 2,33 Gm7546              | PSR0700029212.mm.1 | -2,63 | 0,017547 | 0,464139 Alternative 5' Donc | 0,26 |
| TC0200003526.mm.1 | -1,59 Rbm43              | JUC0200015107.mm.1 | 2,34  | 0,012996 | 0,439291                     |      |
| TC0200003526.mm.1 | -1,59 Rbm43              | PSR0200029950.mm.1 | 2,14  | 0,025567 | 0,497808 Alternative 3' Acce | 0,17 |
| TC0500000238.mm.1 | 1,86 Actr3b              | PSR0500001837.mm.1 | 2,34  | 0,002635 | 0,349612 Cassette Exon       | 0,15 |
| TC0500000238.mm.1 | 1,86 Actr3b              | PSR0500001845.mm.1 | -2,1  | 0,003087 | 0,353892 Cassette Exon       | 0,1  |
| TC0500000238.mm.1 | 1,86 Actr3b              | JUC0500001045.mm.1 | -2,79 | 0,009326 | 0,414973                     |      |
| TC0900001020.mm.1 | 1,4 Bmp5                 | JUC0900004380.mm.1 | 2,34  | 0,020766 | 0,479303                     |      |
| TC0900001020.mm.1 | 1,4 Bmp5                 | PSR0900008063.mm.1 | -2,5  | 0,036153 | 0,529844 Cassette Exon       | 0,14 |
| TC0200001583.mm.1 | 1,13 Pax6                | JUC0200005939.mm.1 | 2,34  | 0,017373 | 0,463612                     |      |
| TC0200001583.mm.1 | 1,13 Pax6                | JUC0200005909.mm.1 | 2,14  | 0,037802 | 0,534741                     |      |
| TC0200001583.mm.1 | 1,13 Pax6                | PSR0200011894.mm.1 | -2,01 | 0,046295 | 0,556186 Alternative 5' Donc | 0,13 |
| TC1500000031.mm.1 | -2,03 Dab2; LOC101055883 | PSR1500000249.mm.1 | 2,34  | 0,042672 | 0,548097 Alternative 3' Acce | 0,13 |
| TC1300001546.mm.1 | -1,53 Zfp389             | PSR1300009783.mm.1 | 2,34  | 0,041613 | 0,545095 Cassette Exon       | 0,12 |
| TC1300000175.mm.1 | -4,17 Hist1h2bm          | PSR1300001172.mm.1 | 2,34  | 0,015568 | 0,454866 Cassette Exon       | 0,12 |
| TC0600000344.mm.1 | 1,08 Nup205              | JUC0600001302.mm.1 | 2,34  | 0,017212 | 0,462545                     |      |
| TC0600000344.mm.1 | 1,08 Nup205              | PSR0600002644.mm.1 | -2,01 | 0,020026 | 0,476453 Alternative 5' Donc | 0,11 |
| TC1200000263.mm.1 | -1,23 Lamb1              | JUC1200001172.mm.1 | 2,34  | 0,047178 | 0,558033                     |      |
| TC1500001868.mm.1 | 1,11 Pla2g6              | JUC1500008311.mm.1 | 2,34  | 0,00564  | 0,381609                     |      |
| TC0200002146.mm.1 | 1,16 Pet117; Csrp2bp     | JUC0200008503.mm.1 | 2,34  | 0,018418 | 0,468484                     |      |
| TC0100003892.mm.1 | -1,17 Gm1305             | JUC0100017016.mm.1 | 2,34  | 0,010539 | 0,422281                     |      |
| TC0100003892.mm.1 | -1,17 Gm1305             | JUC0100017023.mm.1 | 2,21  | 0,043134 | 0,548664                     |      |
| TC1700000629.mm.1 | -1,08 Btl2               | JUC1700003339.mm.1 | 2,34  | 0,020084 | 0,4766                       |      |
| TC0100003443.mm.1 | 1,14 Dcaf6               | JUC0100016137.mm.1 | 2,34  | 0,007946 | 0,403819                     |      |
| TC1100001730.mm.1 | -1,07 Itgb3              | JUC1100008481.mm.1 | 2,34  | 0,015026 | 0,452111                     |      |
| TC0700000989.mm.1 | 1,12 Snrpa1              | JUC0700004657.mm.1 | 2,34  | 0,017413 | 0,46377                      |      |
| TC0700000936.mm.1 | 1,34 Herc2               | JUC0700004353.mm.1 | 2,34  | 0,021711 | 0,484104                     |      |
| TC0700000936.mm.1 | 1,34 Herc2               | JUC0700004361.mm.1 | -2,39 | 0,007158 | 0,397855                     |      |
| TC0700000936.mm.1 | 1,34 Herc2               | JUC0700004297.mm.1 | -2,45 | 0,012555 | 0,435721                     |      |
| TC0600002782.mm.1 | -1,33 AY512915           | JUC0600011218.mm.1 | 2,34  | 0,003429 | 0,355303                     |      |
| TC0300001289.mm.1 | 1,23 Zgrf1               | JUC0300005477.mm.1 | 2,34  | 0,007696 | 0,402552                     |      |
| TC0900002688.mm.1 | -1,53 Fam83b             | JUC0900012465.mm.1 | 2,34  | 0,029311 | 0,509874                     |      |
| TC0900002735.mm.1 | -1,68 Col12a1            | JUC0900012622.mm.1 | 2,34  | 0,012916 | 0,438335                     |      |
| TC0900002735.mm.1 | -1,68 Col12a1            | JUC0900012656.mm.1 | -2,23 | 0,044008 | 0,550779                     |      |
| TC1000001079.mm.1 | -1,17 Gnptab             | JUC1000004385.mm.1 | 2,34  | 0,048762 | 0,561437                     |      |
| TC1000001079.mm.1 | -1,17 Gnptab             | JUC1000004366.mm.1 | 2,03  | 0,019278 | 0,473074                     |      |
| TC0Y00000291.mm.1 | 1,1 Gm20858              | JUC0Y00001233.mm.1 | 2,34  | 0,020478 | 0,478018                     |      |
| TC0X00002447.mm.1 | -1,04 Flna               | JUC0X00007932.mm.1 | 2,34  | 0,031041 | 0,515011                     |      |
| TC0Y00000285.mm.1 | 1,1 Gm20857; Gm20858     | JUC0Y00001197.mm.1 | 2,34  | 0,020478 | 0,478018                     |      |
| TC0Y00000288.mm.1 | 1,1 Gm20858              | JUC0Y00001215.mm.1 | 2,34  | 0,020478 | 0,478018                     |      |
| TC0Y00000290.mm.1 | 1,1 Gm20858              | JUC0Y00001224.mm.1 | 2,34  | 0,020478 | 0,478018                     |      |
| TC0600003135.mm.1 | 1,07 Gapdh; Gm20899      | PSR0600024459.mm.1 | 2,33  | 0,008271 | 0,405976 Alternative 3' Acce | 0,18 |

|                   |                               |                    |       |          |                              |      |
|-------------------|-------------------------------|--------------------|-------|----------|------------------------------|------|
| TC0600003135.mm.1 | 1,07 Gapdh; Gm20899           | PSR0600024446.mm.1 | 2,3   | 0,002015 | 0,34123 Intron Retention     | 0,33 |
| TC0600003135.mm.1 | 1,07 Gapdh; Gm20899           | PSR0600024458.mm.1 | 2,14  | 0,016546 | 0,459612 Alternative 5' Donc | 0,18 |
| TC0600003135.mm.1 | 1,07 Gapdh; Gm20899           | JUC0600012734.mm.1 | 2,06  | 0,006256 | 0,388622                     |      |
| TC0600003135.mm.1 | 1,07 Gapdh; Gm20899           | PSR0600024465.mm.1 | 2,01  | 0,012283 | 0,434168 Cassette Exon       | 0,1  |
| TC0400003956.mm.1 | 1,3 Vps13d                    | JUC0400017081.mm.1 | 2,33  | 0,028957 | 0,508766                     |      |
| TC0400003956.mm.1 | 1,3 Vps13d                    | PSR0400032781.mm.1 | -2,17 | 0,001345 | 0,325349 Cassette Exon       | 0,04 |
| TC0400003956.mm.1 | 1,3 Vps13d                    | PSR0400032764.mm.1 | -2,61 | 0,002035 | 0,341377 Alternative 3' Acce | 0,24 |
| TC0400003956.mm.1 | 1,3 Vps13d                    | JUC0400017103.mm.1 | -2,69 | 0,000767 | 0,308403                     |      |
| TC0100003541.mm.1 | -1,32 Nit1                    | PSR0100029053.mm.1 | 2,33  | 0,008268 | 0,405976 Cassette Exon       | 0,12 |
| TC0100003541.mm.1 | -1,32 Nit1                    | PSR0100029068.mm.1 | 2,02  | 0,04928  | 0,562691 Intron Retention    | 0,23 |
| TC0100002380.mm.1 | -1,61                         | PSR0100019324.mm.1 | 2,33  | 0,000163 | 0,272566 Alternative 3' Acce | 0,21 |
| TC0200001264.mm.1 | -1,1 Olfr1033                 | PSR0200009985.mm.1 | 2,33  | 0,032992 | 0,521365 Alternative 5' Donc | 0,21 |
| TC1300002143.mm.1 | -1,23 Ctl2a                   | PSR1300013751.mm.1 | 2,33  | 0,008489 | 0,406944 Alternative 3' Acce | 0,21 |
| TC1400000882.mm.1 | -1,53 Fam124a                 | PSR1400007106.mm.1 | 2,33  | 0,040289 | 0,541823 Alternative 3' Acce | 0,17 |
| TC1000001282.mm.1 | -1,21 E2f7                    | PSR1000009576.mm.1 | 2,33  | 0,012081 | 0,43255 Alternative 3' Acce  | 0,15 |
| TC1600000244.mm.1 | -1,13 Gnb1l; Gm16314          | PSR1600002243.mm.1 | 2,33  | 0,037713 | 0,534585 Cassette Exon       | 0,14 |
| TC1600000244.mm.1 | -1,13 Gnb1l; Gm16314          | JUC1600001174.mm.1 | 2,32  | 0,004763 | 0,371039                     |      |
| TC0400002709.mm.1 | -1,55 Tmem245                 | PSR0400021915.mm.1 | 2,33  | 0,043846 | 0,55048 Cassette Exon        | 0,13 |
| TC0400002709.mm.1 | -1,55 Tmem245                 | PSR0400021887.mm.1 | 2,32  | 0,005294 | 0,378059 Alternative 5' Donc | 0,04 |
| TC0400002709.mm.1 | -1,55 Tmem245                 | JUC0400011352.mm.1 | 2,22  | 0,046111 | 0,555792                     |      |
| TC0400001152.mm.1 | -1,09 Cc2d1b                  | PSR0400008197.mm.1 | 2,33  | 0,039962 | 0,540973 Cassette Exon       | 0,12 |
| TC0900002799.mm.1 | 1,16 Snhg5; Gm25122; Gm244    | PSR0900023256.mm.1 | 2,33  | 0,038905 | 0,537874 Cassette Exon       | 0,12 |
| TC0400002063.mm.1 | 1,62 Pank4                    | JUC0400008947.mm.1 | 2,33  | 0,042028 | 0,546158                     |      |
| TC0400002063.mm.1 | 1,62 Pank4                    | JUC0400008944.mm.1 | 2,28  | 0,043021 | 0,54841                      |      |
| TC0400002063.mm.1 | 1,62 Pank4                    | JUC0400008943.mm.1 | -2,2  | 0,036623 | 0,531548                     |      |
| TC0400002063.mm.1 | 1,62 Pank4                    | PSR0400017009.mm.1 | -2,28 | 0,023556 | 0,490947 Intron Retention    | 0,11 |
| TC0400002063.mm.1 | 1,62 Pank4                    | JUC0400008955.mm.1 | -2,49 | 0,022996 | 0,488935                     |      |
| TC0700002038.mm.1 | -1,8 Pkp3                     | PSR0700017953.mm.1 | 2,33  | 0,044698 | 0,552206 Alternative 3' Acce | 0,1  |
| TC0700002038.mm.1 | -1,8 Pkp3                     | JUC0700009528.mm.1 | 2,12  | 0,040377 | 0,541959                     |      |
| TC0900000742.mm.1 | 2,09 Hcn4                     | JUC0900002891.mm.1 | 2,33  | 0,033949 | 0,524252                     |      |
| TC0900000742.mm.1 | 2,09 Hcn4                     | PSR0900005471.mm.1 | -2,09 | 0,038145 | 0,535762 Cassette Exon       | 0,1  |
| TC1200001450.mm.1 | 1,55 Trib2                    | JUC1200005589.mm.1 | 2,33  | 0,01119  | 0,426444                     |      |
| TC1200001450.mm.1 | 1,55 Trib2                    | PSR1200010141.mm.1 | 2,06  | 0,016348 | 0,458641 Cassette Exon       | 0,1  |
| TC1200001450.mm.1 | 1,55 Trib2                    | PSR1200010140.mm.1 | -2,02 | 0,046105 | 0,555758                     |      |
| TC0300002312.mm.1 | -1,57 Sema4a; Mir7011; mmu-n  | JUC0300009230.mm.1 | 2,33  | 0,025452 | 0,497549                     |      |
| TC0300002312.mm.1 | -1,57 Sema4a; Mir7011; mmu-n  | PSR0300017581.mm.1 | 2,12  | 0,047308 | 0,558289 Cassette Exon       | 0,09 |
| TC0700002475.mm.1 | 1,8 Ppm1n                     | PSR0700021787.mm.1 | 2,33  | 0,002995 | 0,353092 Cassette Exon       | 0,04 |
| TC0700002475.mm.1 | 1,8 Ppm1n                     | JUC0700011613.mm.1 | -2,78 | 0,017452 | 0,463886                     |      |
| TC0200002500.mm.1 | -1,15 Pabpc1l                 | JUC0200010377.mm.1 | 2,33  | 0,028317 | 0,506741                     |      |
| TC1100003830.mm.1 | -1,04 Atxn7l3                 | JUC1100018601.mm.1 | 2,33  | 0,042244 | 0,547034                     |      |
| TC1300002201.mm.1 | 1,02 Aaed1                    | JUC1300007401.mm.1 | 2,33  | 0,024934 | 0,495842                     |      |
| TC1300002201.mm.1 | 1,02 Aaed1                    | JUC1300007402.mm.1 | -3,43 | 0,044228 | 0,55119                      |      |
| TC1800000727.mm.1 | 1,28 Rnmt                     | JUC1800002956.mm.1 | 2,33  | 0,007549 | 0,401384                     |      |
| TC1800000727.mm.1 | 1,28 Rnmt                     | PSR1800005305.mm.1 | -2,15 | 0,001976 | 0,340886                     |      |
| TC1800000727.mm.1 | 1,28 Rnmt                     | JUC1800002964.mm.1 | -9,78 | 0,008598 | 0,408294                     |      |
| TC1500001568.mm.1 | -1,63 Atad2                   | JUC1500006671.mm.1 | 2,33  | 0,014969 | 0,452048                     |      |
| TC0900000867.mm.1 | -1,06 Herc1                   | JUC0900003582.mm.1 | 2,33  | 0,048415 | 0,560736                     |      |
| TC0800002558.mm.1 | -1,39 Cd97; Mir1668; mmu-mir- | JUC0800010617.mm.1 | 2,33  | 0,004413 | 0,366761                     |      |

|                   |                            |                    |       |          |                              |      |
|-------------------|----------------------------|--------------------|-------|----------|------------------------------|------|
| TC0700001439.mm.1 | -1,21 Phox2a               | JUC0700006430.mm.1 | 2,33  | 0,009696 | 0,417696                     |      |
| TC0600000180.mm.1 | -1,05 Ing3                 | JUC0600000552.mm.1 | 2,33  | 0,047028 | 0,557783                     |      |
| TC1100000694.mm.1 | 1,04 Trim58                | JUC1100002893.mm.1 | 2,33  | 0,014366 | 0,448293                     |      |
| TC0400000993.mm.1 | -1,14 Angptl3              | JUC0400003425.mm.1 | 2,33  | 0,01722  | 0,462614                     |      |
| TC1100003083.mm.1 | 1,32 Acadvl                | JUC1100014888.mm.1 | 2,33  | 0,028076 | 0,506011                     |      |
| TC1100003083.mm.1 | 1,32 Acadvl                | JUC1100014870.mm.1 | -2,13 | 0,016336 | 0,458616                     |      |
| TC0100001860.mm.1 | 2,41 Rd3                   | JUC0100008770.mm.1 | 2,32  | 0,044608 | 0,552129                     |      |
| TC0100001860.mm.1 | 2,41 Rd3                   | PSR0100015405.mm.1 | -2,38 | 0,044029 | 0,550824 Alternative 3' Acce | 0,22 |
| TC0100001860.mm.1 | 2,41 Rd3                   | JUC0100008768.mm.1 | -4,28 | 0,042728 | 0,548097                     |      |
| TC0100001860.mm.1 | 2,41 Rd3                   | PSR0100015408.mm.1 | -4,51 | 0,027601 | 0,504485 Cassette Exon       | 0,39 |
| TC0200004602.mm.1 | -1,96 Il1b                 | PSR0200039424.mm.1 | 2,32  | 0,009602 | 0,417256 Cassette Exon       | 0,21 |
| TC0600002127.mm.1 | 1,01 Braf                  | PSR0600016831.mm.1 | 2,32  | 0,01091  | 0,424541 Cassette Exon       | 0,21 |
| TC1100003821.mm.1 | 1,42 Mpp2                  | PSR1100035432.mm.1 | 2,32  | 0,039332 | 0,539324 Alternative 3' Acce | 0,21 |
| TC0100001696.mm.1 | -1,54 A730054J21Rik        | PSR0100014009.mm.1 | 2,32  | 0,002599 | 0,349501 Alternative 3' Acce | 0,2  |
| TC1000002616.mm.1 | -1,22 Syn3                 | PSR1000019725.mm.1 | 2,32  | 0,032903 | 0,521149 Alternative 3' Acce | 0,1  |
| TC1000002616.mm.1 | -1,22 Syn3                 | JUC1000010782.mm.1 | 2,2   | 0,03725  | 0,53345                      |      |
| TC1000002616.mm.1 | -1,22 Syn3                 | JUC1000010788.mm.1 | 2,06  | 0,013445 | 0,442693                     |      |
| TC0400002386.mm.1 | 1,09 Orc3                  | PSR0400019347.mm.1 | 2,32  | 0,043772 | 0,550398 Cassette Exon       | 0,07 |
| TC0400002386.mm.1 | 1,09 Orc3                  | JUC0400010086.mm.1 | -2,02 | 0,035535 | 0,528764                     |      |
| TC0400002386.mm.1 | 1,09 Orc3                  | JUC0400010069.mm.1 | -2,14 | 0,002973 | 0,352501                     |      |
| TC0200002879.mm.1 | 1,34 Cdc123                | PSR0200023898.mm.1 | 2,32  | 0,04856  | 0,561008 Cassette Exon       | 0,06 |
| TC1400002182.mm.1 | -1,11 Sgcg                 | PSR1400016898.mm.1 | 2,32  | 0,003752 | 0,357586                     |      |
| TC1400002182.mm.1 | -1,11 Sgcg                 | JUC1400009249.mm.1 | -2,21 | 0,042262 | 0,547092                     |      |
| TC1300002086.mm.1 | -1,05 Spock1               | JUC1300006832.mm.1 | 2,32  | 0,03688  | 0,532257                     |      |
| TC0100003120.mm.1 | -1,11 Ptprv                | JUC0100014334.mm.1 | 2,32  | 0,047075 | 0,557792                     |      |
| TC0100003120.mm.1 | -1,11 Ptprv                | JUC0100014323.mm.1 | -2,06 | 0,040837 | 0,543283                     |      |
| TC1700001693.mm.1 | 1,42 Itfg3                 | JUC1700008548.mm.1 | 2,32  | 0,014824 | 0,45116                      |      |
| TC1900000951.mm.1 | 1,44 Cnih2                 | JUC1900004608.mm.1 | 2,32  | 0,008018 | 0,404221                     |      |
| TC1500001167.mm.1 | -1,29 Osmr                 | JUC1500005268.mm.1 | 2,32  | 0,021847 | 0,484607                     |      |
| TC1500000255.mm.1 | -1,3                       | JUC1500001129.mm.1 | 2,32  | 0,044683 | 0,552176                     |      |
| TC1500000485.mm.1 | -1,08 Phf20l1              | JUC1500002003.mm.1 | 2,32  | 0,046744 | 0,556856                     |      |
| TC0800000882.mm.1 | 1,3 Otud4                  | JUC0800003499.mm.1 | 2,32  | 0,049623 | 0,563422                     |      |
| TC0900001504.mm.1 | 1,8 Clasp2                 | JUC0900007049.mm.1 | 2,32  | 0,039936 | 0,540973                     |      |
| TC0900001504.mm.1 | 1,8 Clasp2                 | JUC0900007063.mm.1 | 2,18  | 0,0128   | 0,437279                     |      |
| TC0900001504.mm.1 | 1,8 Clasp2                 | JUC0900007067.mm.1 | -2,25 | 0,000409 | 0,297771                     |      |
| TC0900001504.mm.1 | 1,8 Clasp2                 | JUC0900007037.mm.1 | -2,32 | 0,031052 | 0,515022                     |      |
| TC0600000711.mm.1 | -1,14 Abcg2; 4930430M16Rik | JUC0600002741.mm.1 | 2,32  | 0,002877 | 0,352207                     |      |
| TC0600002551.mm.1 | -1,04                      | JUC0600010262.mm.1 | 2,32  | 0,005183 | 0,376851                     |      |
| TC0500003696.mm.1 | -1,53                      | JUC0500018316.mm.1 | 2,32  | 0,002926 | 0,352289                     |      |
| TC0700002053.mm.1 | -1,4 Pnpla2                | JUC0700009644.mm.1 | 2,32  | 0,024196 | 0,493294                     |      |
| TC1100001684.mm.1 | -1,29 BC030867             | JUC1100008210.mm.1 | 2,32  | 0,018176 | 0,467441                     |      |
| TC0900002269.mm.1 | -1,13 Bco2                 | JUC0900010629.mm.1 | 2,32  | 0,006416 | 0,389881                     |      |
| TC1100002553.mm.1 | 3,96 Gabrg2                | JUC1100012309.mm.1 | 2,31  | 0,012588 | 0,435924                     |      |
| TC1100002553.mm.1 | 3,96 Gabrg2                | PSR1100023639.mm.1 | 2,08  | 0,001599 | 0,332546 Cassette Exon       | 0,12 |
| TC1100002553.mm.1 | 3,96 Gabrg2                | PSR1100023641.mm.1 | 2,06  | 0,007365 | 0,39938 Cassette Exon        | 0,15 |
| TC1100002553.mm.1 | 3,96 Gabrg2                | PSR1100023624.mm.1 | -2,07 | 0,009607 | 0,417256 Alternative 3' Acce | 0,08 |
| TC1100002553.mm.1 | 3,96 Gabrg2                | PSR1100023643.mm.1 | -2,6  | 0,02632  | 0,500739 Alternative 5' Donc | 0,19 |
| TC1100002553.mm.1 | 3,96 Gabrg2                | PSR1100023632.mm.1 | -3,25 | 0,015604 | 0,455078 Alternative 3' Acce | 0,36 |

|                   |                    |                    |        |          |                              |      |
|-------------------|--------------------|--------------------|--------|----------|------------------------------|------|
| TC1100002553.mm.1 | 3,96 Gabrg2        | PSR1100023634.mm.1 | -3,43  | 0,008625 | 0,408463 Alternative 5' Donc | 0,39 |
| TC1100002553.mm.1 | 3,96 Gabrg2        | PSR1100023645.mm.1 | -3,62  | 0,013962 | 0,446239 Alternative 5' Donc | 0,42 |
| TC1100002553.mm.1 | 3,96 Gabrg2        | PSR1100023635.mm.1 | -3,96  | 0,002486 | 0,349135 Alternative 3' Acce | 0,47 |
| TC1100002553.mm.1 | 3,96 Gabrg2        | PSR1100023629.mm.1 | -4,46  | 0,004668 | 0,370181                     |      |
| TC1100002553.mm.1 | 3,96 Gabrg2        | PSR1100023647.mm.1 | -11,84 | 0,001961 | 0,340561 Alternative 5' Donc | 0,37 |
| TC1100002553.mm.1 | 3,96 Gabrg2        | JUC1100012311.mm.1 | -16,07 | 0,003389 | 0,3547                       |      |
| TC1100002553.mm.1 | 3,96 Gabrg2        | JUC1100012302.mm.1 | -16,41 | 0,000072 | 0,251428                     |      |
| TC0200004493.mm.1 | 5,99 Frmd5         | JUC0200019659.mm.1 | 2,31   | 0,021552 | 0,483034                     |      |
| TC0200004493.mm.1 | 5,99 Frmd5         | JUC0200019656.mm.1 | 2,17   | 0,006634 | 0,392813                     |      |
| TC0200004493.mm.1 | 5,99 Frmd5         | PSR0200038140.mm.1 | -2,36  | 0,000949 | 0,313363 Cassette Exon       | 0,13 |
| TC0200004493.mm.1 | 5,99 Frmd5         | PSR0200038145.mm.1 | -2,55  | 0,000166 | 0,272566 Cassette Exon       | 0,06 |
| TC0200004493.mm.1 | 5,99 Frmd5         | PSR0200038139.mm.1 | -2,91  | 0,000399 | 0,297747 Cassette Exon       | 0,13 |
| TC0200004493.mm.1 | 5,99 Frmd5         | PSR0200038163.mm.1 | -3,59  | 0,00622  | 0,387912                     |      |
| TC0200004493.mm.1 | 5,99 Frmd5         | PSR0200038148.mm.1 | -3,62  | 0,011218 | 0,426683 Alternative 3' Acce | 0,42 |
| TC0200004493.mm.1 | 5,99 Frmd5         | PSR0200038127.mm.1 | -3,79  | 0,005133 | 0,376377 Alternative 3' Acce | 0,45 |
| TC0200004493.mm.1 | 5,99 Frmd5         | JUC0200019663.mm.1 | -4,1   | 0,00041  | 0,297771                     |      |
| TC0200004493.mm.1 | 5,99 Frmd5         | PSR0200038164.mm.1 | -4,59  | 0,006319 | 0,38927 Alternative 5' Donc  | 0,07 |
| TC0200004493.mm.1 | 5,99 Frmd5         | PSR0200038137.mm.1 | -4,7   | 0,002335 | 0,347265 Cassette Exon       | 0,13 |
| TC0200004493.mm.1 | 5,99 Frmd5         | JUC0200019668.mm.1 | -4,72  | 0,0075   | 0,400933                     |      |
| TC0200004493.mm.1 | 5,99 Frmd5         | JUC0200019670.mm.1 | -5,01  | 0,003067 | 0,353892                     |      |
| TC0200004493.mm.1 | 5,99 Frmd5         | PSR0200038167.mm.1 | -5,25  | 0,047407 | 0,558302 Alternative 5' Donc | 0,07 |
| TC0200004493.mm.1 | 5,99 Frmd5         | PSR0200038155.mm.1 | -6,17  | 0,001382 | 0,32572 Cassette Exon        | 0,28 |
| TC0200004493.mm.1 | 5,99 Frmd5         | PSR0200038160.mm.1 | -6,43  | 0,003126 | 0,353892 Cassette Exon       | 0,44 |
| TC0200004493.mm.1 | 5,99 Frmd5         | PSR0200038147.mm.1 | -7,28  | 0,003618 | 0,356223 Cassette Exon       | 0,29 |
| TC0200004493.mm.1 | 5,99 Frmd5         | JUC0200019654.mm.1 | -7,53  | 0,000314 | 0,288663                     |      |
| TC0200004493.mm.1 | 5,99 Frmd5         | JUC0200019666.mm.1 | -9     | 0,005403 | 0,378967                     |      |
| TC0200004493.mm.1 | 5,99 Frmd5         | JUC0200019652.mm.1 | -9,06  | 0,008901 | 0,410728                     |      |
| TC1300001955.mm.1 | 3,17 Susd3         | JUC1300006317.mm.1 | 2,31   | 0,002263 | 0,34578                      |      |
| TC1300001955.mm.1 | 3,17 Susd3         | PSR1300012244.mm.1 | -2,15  | 0,037861 | 0,534818 Cassette Exon       | 0,05 |
| TC1300001955.mm.1 | 3,17 Susd3         | PSR1300012245.mm.1 | -2,58  | 0,009785 | 0,417839 Cassette Exon       | 0,27 |
| TC1300001955.mm.1 | 3,17 Susd3         | PSR1300012254.mm.1 | -3,42  | 0,01518  | 0,452699 Cassette Exon       | 0,17 |
| TC0400003599.mm.1 | -1,29 Hdac1        | PSR0400029350.mm.1 | 2,31   | 0,004564 | 0,369273 Cassette Exon       | 0,11 |
| TC1200000126.mm.1 | -1,31              | PSR1200001102.mm.1 | 2,31   | 0,01679  | 0,460623 Cassette Exon       | 0,1  |
| TC0800001215.mm.1 | 1,4 Slc9a5         | JUC0800005183.mm.1 | 2,31   | 0,007933 | 0,403819                     |      |
| TC0800001215.mm.1 | 1,4 Slc9a5         | JUC0800005176.mm.1 | 2,13   | 0,03153  | 0,517029                     |      |
| TC0800001215.mm.1 | 1,4 Slc9a5         | PSR0800009596.mm.1 | -2,05  | 0,001457 | 0,328449 Cassette Exon       | 0,06 |
| TC1400002120.mm.1 | -2,05 Gzmb         | JUC1400008917.mm.1 | 2,31   | 0,000307 | 0,288663                     |      |
| TC0200002821.mm.1 | 1,18 Rtel1         | JUC0200011739.mm.1 | 2,31   | 0,02226  | 0,485896                     |      |
| TC0200002821.mm.1 | 1,18 Rtel1         | JUC0200011753.mm.1 | 2,16   | 0,024367 | 0,49362                      |      |
| TC0200002821.mm.1 | 1,18 Rtel1         | JUC0200011773.mm.1 | -2,06  | 0,002204 | 0,345178                     |      |
| TC0200002821.mm.1 | 1,18 Rtel1         | JUC0200011772.mm.1 | -2,19  | 0,012595 | 0,435933                     |      |
| TC0200002821.mm.1 | 1,18 Rtel1         | JUC0200011769.mm.1 | -2,5   | 0,002878 | 0,352207                     |      |
| TC1200000359.mm.1 | -1,29 Dock4        | JUC1200001479.mm.1 | 2,31   | 0,014149 | 0,447466                     |      |
| TC1200000359.mm.1 | -1,29 Dock4        | JUC1200001476.mm.1 | -2,29  | 0,031    | 0,514828                     |      |
| TC0200003656.mm.1 | -1,37 Cobll1       | JUC0200015804.mm.1 | 2,31   | 0,012053 | 0,432426                     |      |
| TC1700001156.mm.1 | 1,35 Spast         | JUC1700005914.mm.1 | 2,31   | 0,028486 | 0,50733                      |      |
| TC0800000875.mm.1 | -1,45              | PSR0800006550.mm.1 | 2,31   | 0,033608 | 0,523309                     |      |
| TC1700000176.mm.1 | 1,4 Ermard; Gm3435 | JUC1700000772.mm.1 | 2,31   | 0,047644 | 0,558744                     |      |

|                   |                       |                    |       |          |                              |      |
|-------------------|-----------------------|--------------------|-------|----------|------------------------------|------|
| TC1700000176.mm.1 | 1,4 Ermard; Gm3435    | JUC1700000788.mm.1 | -2,42 | 0,000362 | 0,290942                     |      |
| TC1600001340.mm.1 | -1,15 Parl            | JUC1600005749.mm.1 | 2,31  | 0,002496 | 0,349135                     |      |
| TC1600001352.mm.1 | 1,01 Clcn2            | JUC1600005855.mm.1 | 2,31  | 0,025745 | 0,498353                     |      |
| TC0500002157.mm.1 | -1,05 Otof            | JUC0500010695.mm.1 | 2,31  | 0,014943 | 0,451968                     |      |
| TC0500002252.mm.1 | -1,25 Htra3           | JUC0500011240.mm.1 | 2,31  | 0,020869 | 0,479521                     |      |
| TC0500002252.mm.1 | -1,25 Htra3           | JUC0500011244.mm.1 | -2,05 | 0,007472 | 0,400381                     |      |
| TC0900000696.mm.1 | -1,02 Man2c1          | JUC0900002696.mm.1 | 2,31  | 0,007704 | 0,402552                     |      |
| TC0900000696.mm.1 | -1,02 Man2c1          | JUC0900002688.mm.1 | -2,67 | 0,022798 | 0,488229                     |      |
| TC0800003093.mm.1 | -1,31 Chmp1a          | JUC0800013134.mm.1 | 2,31  | 0,016363 | 0,458693                     |      |
| TC0600000813.mm.1 | -1,17 Eif2ak3         | JUC0600003111.mm.1 | 2,31  | 0,000168 | 0,272566                     |      |
| TC0700001352.mm.1 | -1,18 Kctd14          | JUC0700005912.mm.1 | 2,31  | 0,043627 | 0,550161                     |      |
| TC1100001054.mm.1 | 1,1 Smg6              | JUC1100005027.mm.1 | 2,31  | 0,023559 | 0,490947                     |      |
| TC0300002752.mm.1 | -1,05 Stxbp3a         | JUC0300011292.mm.1 | 2,31  | 0,031504 | 0,516965                     |      |
| TC1000002257.mm.1 | 1,39 Hkdc1            | JUC1000008805.mm.1 | 2,31  | 0,025114 | 0,496358                     |      |
| TC0300002450.mm.1 | -1,58 Tuft1           | JUC0300009801.mm.1 | 2,31  | 0,007235 | 0,39826                      |      |
| TC0Y00000286.mm.1 | 1,11 Gm20858          | JUC0Y00001206.mm.1 | 2,31  | 0,020525 | 0,478276                     |      |
| TC0200004539.mm.1 | 3,07 Hdc              | JUC0200020056.mm.1 | 2,3   | 0,019856 | 0,475698                     |      |
| TC0200004539.mm.1 | 3,07 Hdc              | JUC0200020047.mm.1 | 2,01  | 0,030048 | 0,511812                     |      |
| TC0200004539.mm.1 | 3,07 Hdc              | PSR0200038740.mm.1 | -2,56 | 0,020985 | 0,480104 Alternative 5' Donc | 0,16 |
| TC0200004539.mm.1 | 3,07 Hdc              | JUC0200020051.mm.1 | -2,58 | 0,003136 | 0,353892                     |      |
| TC0200004539.mm.1 | 3,07 Hdc              | PSR0200038726.mm.1 | -2,78 | 0,015515 | 0,454456 Alternative 3' Acce | 0,28 |
| TC0200004539.mm.1 | 3,07 Hdc              | PSR0200038725.mm.1 | -3,16 | 0,015925 | 0,456718 Alternative 5' Donc | 0,31 |
| TC0200004539.mm.1 | 3,07 Hdc              | JUC0200020055.mm.1 | -3,2  | 0,003181 | 0,354243                     |      |
| TC0200004539.mm.1 | 3,07 Hdc              | PSR0200038736.mm.1 | -3,23 | 0,017121 | 0,46232 Alternative 5' Donc  | 0,26 |
| TC0200004539.mm.1 | 3,07 Hdc              | PSR0200038744.mm.1 | -4,16 | 0,003159 | 0,353892 Cassette Exon       | 0,37 |
| TC0200004539.mm.1 | 3,07 Hdc              | PSR0200038721.mm.1 | -5,08 | 0,005663 | 0,381922 Alternative 3' Acce | 0,48 |
| TC1800000418.mm.1 | 1,77 Kctd16           | JUC1800001728.mm.1 | 2,3   | 0,013317 | 0,441836                     |      |
| TC1800000418.mm.1 | 1,77 Kctd16           | PSR1800003108.mm.1 | -2,61 | 0,013365 | 0,442156 Cassette Exon       | 0,26 |
| TC1800000418.mm.1 | 1,77 Kctd16           | JUC1800001731.mm.1 | -2,79 | 0,018371 | 0,468484                     |      |
| TC1400002171.mm.1 | 1,04 Nupl1; Mir719    | PSR1400016832.mm.1 | 2,3   | 0,029169 | 0,509333 Alternative 3' Acce | 0,21 |
| TC1600001770.mm.1 | -1,56 St3gal6         | JUC1600007475.mm.1 | 2,3   | 0,048851 | 0,561704                     |      |
| TC1600001770.mm.1 | -1,56 St3gal6         | PSR1600014395.mm.1 | 2,13  | 0,029255 | 0,509776 Alternative 5' Donc | 0,15 |
| TC1600001770.mm.1 | -1,56 St3gal6         | PSR1600014402.mm.1 | 2,13  | 0,022639 | 0,487515 Intron Retention    | 0,15 |
| TC1200002527.mm.1 | -1,64 Rpl36al; Rpl36a | JUC1200006971.mm.1 | 2,3   | 0,015333 | 0,453763                     |      |
| TC1200002527.mm.1 | -1,64 Rpl36al; Rpl36a | PSR1200012614.mm.1 | 2,03  | 0,031276 | 0,516064 Intron Retention    | 0,13 |
| TC0400001777.mm.1 | -1,09 Spata21         | PSR0400014702.mm.1 | 2,3   | 0,019479 | 0,474295 Cassette Exon       | 0,12 |
| TC0400000207.mm.1 | -1,25 Mms22l          | PSR0400001343.mm.1 | 2,3   | 0,006698 | 0,393343 Cassette Exon       | 0,11 |
| TC1200000989.mm.1 | -1,81 Kcnk13          | PSR1200006897.mm.1 | 2,3   | 0,000717 | 0,306015 Alternative 5' Donc | 0,11 |
| TC0700002446.mm.1 | -1,06                 | PSR0700021558.mm.1 | 2,3   | 0,021566 | 0,483109 Cassette Exon       | 0,08 |
| TC0500003024.mm.1 | 1,33 Adrbk2           | JUC0500014710.mm.1 | 2,3   | 0,016672 | 0,460085                     |      |
| TC0500003024.mm.1 | 1,33 Adrbk2           | PSR0500026886.mm.1 | 2,18  | 0,002136 | 0,343402 Cassette Exon       | 0,07 |
| TC0500003024.mm.1 | 1,33 Adrbk2           | JUC0500014696.mm.1 | -6,61 | 0,001793 | 0,336311                     |      |
| TC0200003121.mm.1 | -1,47                 | JUC0200012969.mm.1 | 2,3   | 0,000463 | 0,298999                     |      |
| TC1900001524.mm.1 | 1,03 Crtac1           | JUC1900007434.mm.1 | 2,3   | 0,023587 | 0,490995                     |      |
| TC1900001524.mm.1 | 1,03 Crtac1           | JUC1900007436.mm.1 | 2,06  | 0,028815 | 0,508347                     |      |
| TC1600001667.mm.1 | -1,47 Phldb2          | JUC1600007136.mm.1 | 2,3   | 0,014341 | 0,448173                     |      |
| TC0700004664.mm.1 | -1,24 Prss53          | JUC0700019244.mm.1 | 2,3   | 0,0109   | 0,42445                      |      |
| TC0700000938.mm.1 | 1,09 Oca2             | JUC0700004412.mm.1 | 2,3   | 0,034685 | 0,526294                     |      |



|                   |                    |                    |        |          |                              |      |
|-------------------|--------------------|--------------------|--------|----------|------------------------------|------|
| TC0700000938.mm.1 | 1,09 Oca2          | JUC0700004396.mm.1 | 2,13   | 0,002919 | 0,352289                     |      |
| TC0600003439.mm.1 | 1,25 Asun          | JUC0600014258.mm.1 | 2,3    | 0,032721 | 0,520439                     |      |
| TC0300003084.mm.1 | 1,1 Clca3          | JUC0300012714.mm.1 | 2,3    | 0,022367 | 0,486407                     |      |
| TC1100002844.mm.1 | 1,85 Guk1          | JUC1100013446.mm.1 | 2,3    | 0,01425  | 0,447947                     |      |
| TC1100002844.mm.1 | 1,85 Guk1          | JUC1100013451.mm.1 | -2,21  | 0,047997 | 0,559574                     |      |
| TC0500000013.mm.1 | 1,01 1700109H08Rik | JUC0500000035.mm.1 | 2,3    | 0,035153 | 0,527974                     |      |
| TC1000001257.mm.1 | 1,94 Ppfa2         | JUC1000005091.mm.1 | 2,29   | 0,031015 | 0,514914                     |      |
| TC1000001257.mm.1 | 1,94 Ppfa2         | PSR1000009489.mm.1 | -2,06  | 0,013597 | 0,443703 Alternative 5' Donc | 0,16 |
| TC1000001257.mm.1 | 1,94 Ppfa2         | PSR1000009453.mm.1 | -2,43  | 0,02676  | 0,502096 Cassette Exon       | 0,14 |
| TC1000001257.mm.1 | 1,94 Ppfa2         | JUC1000005120.mm.1 | -2,55  | 0,013518 | 0,443431                     |      |
| TC1000001257.mm.1 | 1,94 Ppfa2         | PSR1000009458.mm.1 | -2,58  | 0,002734 | 0,349612 Cassette Exon       | 0,14 |
| TC1000001257.mm.1 | 1,94 Ppfa2         | JUC1000005122.mm.1 | -2,91  | 0,045334 | 0,553867                     |      |
| TC1000001257.mm.1 | 1,94 Ppfa2         | JUC1000005110.mm.1 | -3,42  | 0,027585 | 0,504482                     |      |
| TC1000001257.mm.1 | 1,94 Ppfa2         | PSR1000009480.mm.1 | -3,49  | 0,0098   | 0,417839 Cassette Exon       | 0,36 |
| TC1000001257.mm.1 | 1,94 Ppfa2         | JUC1000005104.mm.1 | -4,72  | 0,022629 | 0,487464                     |      |
| TC0200001221.mm.1 | 1,52 Ypel4         | PSR0200009729.mm.1 | 2,29   | 0,022149 | 0,48561 Cassette Exon        | 0,16 |
| TC0200001221.mm.1 | 1,52 Ypel4         | PSR0200009735.mm.1 | -2,14  | 0,003569 | 0,356223 Alternative 5' Donc | 0,18 |
| TC0200001221.mm.1 | 1,52 Ypel4         | PSR0200009720.mm.1 | -5,6   | 0,000006 | 0,179072 Alternative 3' Acce | 0,34 |
| TC0600002493.mm.1 | 1,1 Sh2d6          | PSR0600019332.mm.1 | 2,29   | 0,000787 | 0,309905 Cassette Exon       | 0,11 |
| TC0600002493.mm.1 | 1,1 Sh2d6          | PSR0600019331.mm.1 | -3,92  | 0,034758 | 0,52661 Cassette Exon        | 0,29 |
| TC0900002767.mm.1 | 8,56 Elov14        | JUC0900012805.mm.1 | 2,29   | 0,011597 | 0,429361                     |      |
| TC0900002767.mm.1 | 8,56 Elov14        | PSR0900022903.mm.1 | -2,25  | 0,000752 | 0,308185 Cassette Exon       | 0,2  |
| TC0900002767.mm.1 | 8,56 Elov14        | JUC0900012806.mm.1 | -4,51  | 0,003618 | 0,356223                     |      |
| TC0900002767.mm.1 | 8,56 Elov14        | PSR0900022907.mm.1 | -14,41 | 0,007967 | 0,403853 Alternative 5' Donc | 0,28 |
| TC0400003702.mm.1 | 3,31 Trnp1         | PSR0400030353.mm.1 | 2,29   | 0,004007 | 0,36119 Cassette Exon        | 0,13 |
| TC0400003702.mm.1 | 3,31 Trnp1         | PSR0400030350.mm.1 | 2,08   | 0,008882 | 0,410619 Cassette Exon       | 0,08 |
| TC0400003702.mm.1 | 3,31 Trnp1         | PSR0400030352.mm.1 | 2,05   | 0,002315 | 0,346468 Cassette Exon       | 0,08 |
| TC0400003702.mm.1 | 3,31 Trnp1         | PSR0400030354.mm.1 | -2,61  | 0,049835 | 0,563773 Alternative 5' Donc | 0,26 |
| TC0100003568.mm.1 | 2,68 Kcnj9         | PSR0100029333.mm.1 | 2,29   | 0,004909 | 0,372662 Alternative 5' Donc | 0,21 |
| TC0100003568.mm.1 | 2,68 Kcnj9         | PSR0100029330.mm.1 | -2,25  | 0,009411 | 0,415853 Cassette Exon       | 0,2  |
| TC0100003568.mm.1 | 2,68 Kcnj9         | PSR0100029335.mm.1 | -2,42  | 0,034673 | 0,526294 Cassette Exon       | 0,13 |
| TC0100003568.mm.1 | 2,68 Kcnj9         | JUC0100016679.mm.1 | -2,79  | 0,029085 | 0,509063                     |      |
| TC0100003872.mm.1 | -1,55 Irf6         | JUC0100008805.mm.1 | 2,29   | 0,001619 | 0,332831                     |      |
| TC0100003872.mm.1 | -1,55 Irf6         | PSR0100015486.mm.1 | 2,07   | 0,045446 | 0,554176 Alternative 3' Acce | 0,17 |
| TC0100002586.mm.1 | -1,15 Zfp142       | PSR0100020883.mm.1 | 2,29   | 0,026028 | 0,499483 Cassette Exon       | 0,14 |
| TC0400004088.mm.1 | 1,21 Zbtb48        | JUC0400017738.mm.1 | 2,29   | 0,010273 | 0,420305                     |      |
| TC0400004088.mm.1 | 1,21 Zbtb48        | JUC0400017741.mm.1 | 2,26   | 0,020881 | 0,479589                     |      |
| TC0400004088.mm.1 | 1,21 Zbtb48        | PSR0400034003.mm.1 | -2,43  | 0,008023 | 0,404268 Alternative 5' Donc | 0,14 |
| TC0100000742.mm.1 | -1,33 Gm6264       | PSR0100006232.mm.1 | 2,29   | 0,038466 | 0,536428 Cassette Exon       | 0,12 |
| TC0X00000212.mm.1 | 1,3 Uba1           | PSR0X00001351.mm.1 | 2,29   | 0,043949 | 0,550739 Cassette Exon       | 0,12 |
| TC1500002059.mm.1 | 1,49 Rabl2         | PSR1500016627.mm.1 | 2,29   | 0,002651 | 0,349612 Cassette Exon       | 0,12 |
| TC1600001220.mm.1 | -1,27              | PSR1600009796.mm.1 | 2,29   | 0,04395  | 0,550739 Cassette Exon       | 0,11 |
| TC1600001220.mm.1 | -1,27              | PSR1600009784.mm.1 | 2,2    | 0,0354   | 0,528631 Cassette Exon       | 0,12 |
| TC1600001220.mm.1 | -1,27              | PSR1600009789.mm.1 | 2,14   | 0,013138 | 0,440196 Cassette Exon       | 0,12 |
| TC0300000700.mm.1 | -1,04 Arhgef11     | JUC0300002450.mm.1 | 2,29   | 0,035296 | 0,52837                      |      |
| TC0300000700.mm.1 | -1,04 Arhgef11     | JUC0300002451.mm.1 | 2,24   | 0,009316 | 0,414883                     |      |
| TC0200004568.mm.1 | -1,1 Bub1          | JUC0200020296.mm.1 | 2,29   | 0,033916 | 0,52424                      |      |
| TC0200004568.mm.1 | -1,1 Bub1          | JUC0200020288.mm.1 | -2,41  | 0,014521 | 0,449545                     |      |

|                   |                     |                    |        |          |          |                          |
|-------------------|---------------------|--------------------|--------|----------|----------|--------------------------|
| TC0200001382.mm.1 | 1,2 Ambra1          | JUC0200005500.mm.1 | 2,29   | 0,03302  | 0,521478 |                          |
| TC0500002910.mm.1 | 1,86 Barhl2         | JUC0500013982.mm.1 | 2,29   | 0,018018 | 0,466939 |                          |
| TC0800002428.mm.1 | 1,46 Ano8           | JUC0800010084.mm.1 | 2,29   | 0,01356  | 0,443675 |                          |
| TC0800002428.mm.1 | 1,46 Ano8           | JUC0800010074.mm.1 | -2,23  | 0,003127 | 0,353892 |                          |
| TC0900001428.mm.1 | 1,12 Col7a1; Mir711 | JUC0900006490.mm.1 | 2,29   | 0,013677 | 0,444535 |                          |
| TC0900001428.mm.1 | 1,12 Col7a1; Mir711 | JUC0900006465.mm.1 | -2,29  | 0,034605 | 0,52602  |                          |
| TC0900001428.mm.1 | 1,12 Col7a1; Mir711 | JUC0900006556.mm.1 | -2,29  | 0,027706 | 0,504872 |                          |
| TC0900001428.mm.1 | 1,12 Col7a1; Mir711 | JUC0900006444.mm.1 | -2,6   | 0,031323 | 0,516204 |                          |
| TC0600001076.mm.1 | -1,03 Aldh1l1       | JUC0600004253.mm.1 | 2,29   | 0,004429 | 0,366832 |                          |
| TC0700000285.mm.1 | -1,08 Dmpk          | JUC0700001035.mm.1 | 2,29   | 0,038297 | 0,536106 |                          |
| TC0700002711.mm.1 | -1,66 Ryr1          | JUC0700012751.mm.1 | 2,29   | 0,040536 | 0,542414 |                          |
| TC0700002711.mm.1 | -1,66 Ryr1          | JUC0700012745.mm.1 | 2,2    | 0,043799 | 0,550421 |                          |
| TC0700002711.mm.1 | -1,66 Ryr1          | JUC0700012702.mm.1 | -2,16  | 0,014245 | 0,447947 |                          |
| TC0700002711.mm.1 | -1,66 Ryr1          | JUC0700012697.mm.1 | -2,26  | 0,039749 | 0,540505 |                          |
| TC0700002711.mm.1 | -1,66 Ryr1          | JUC0700012704.mm.1 | -2,53  | 0,030817 | 0,514173 |                          |
| TC0400003648.mm.1 | -1,3 Gm16080        | JUC0400015519.mm.1 | 2,29   | 0,040392 | 0,541998 |                          |
| TC0400003836.mm.1 | -1,25 Otud3         | JUC0400016442.mm.1 | 2,29   | 0,042971 | 0,54838  |                          |
| TC1000000676.mm.1 | -2,3                | PSR1000004714.mm.1 | 2,29   | 0,047105 | 0,557863 |                          |
| TC1300002722.mm.1 | 5,82 Isl1           | PSR1300018433.mm.1 | 2,28   | 0,011885 | 0,431306 | Cassette Exon 0,13       |
| TC1300002722.mm.1 | 5,82 Isl1           | PSR1300018427.mm.1 | -2,14  | 0,001962 | 0,340561 | Cassette Exon 0,21       |
| TC1300002722.mm.1 | 5,82 Isl1           | PSR1300018430.mm.1 | -2,51  | 0,000771 | 0,308743 | Cassette Exon 0,39       |
| TC1300002722.mm.1 | 5,82 Isl1           | PSR1300018422.mm.1 | -3,33  | 0,009255 | 0,414559 | Alternative 3' Acce 0,37 |
| TC1300002722.mm.1 | 5,82 Isl1           | JUC1300009898.mm.1 | -3,46  | 0,031096 | 0,51525  |                          |
| TC1300002722.mm.1 | 5,82 Isl1           | PSR1300018431.mm.1 | -3,58  | 0,008046 | 0,40434  | Cassette Exon 0,4        |
| TC1300002722.mm.1 | 5,82 Isl1           | JUC1300009900.mm.1 | -3,67  | 0,031644 | 0,517405 |                          |
| TC1300002722.mm.1 | 5,82 Isl1           | PSR1300018432.mm.1 | -4,42  | 0,013176 | 0,440629 | Alternative 3' Acce 0,48 |
| TC1300002722.mm.1 | 5,82 Isl1           | PSR1300018436.mm.1 | -7,38  | 0,002024 | 0,341377 | Alternative 5' Donc 0,39 |
| TC1300002722.mm.1 | 5,82 Isl1           | JUC1300009904.mm.1 | -14,77 | 0,005666 | 0,381922 |                          |
| TC0X00003096.mm.1 | 3,28 Gucy2f         | JUC0X00009853.mm.1 | 2,28   | 0,00499  | 0,373851 |                          |
| TC0X00003096.mm.1 | 3,28 Gucy2f         | JUC0X00009842.mm.1 | -2,35  | 0,01489  | 0,45179  |                          |
| TC0X00003096.mm.1 | 3,28 Gucy2f         | JUC0X00009849.mm.1 | -2,4   | 0,011739 | 0,429995 |                          |
| TC0X00003096.mm.1 | 3,28 Gucy2f         | JUC0X00009844.mm.1 | -2,69  | 0,002202 | 0,345178 |                          |
| TC0X00003096.mm.1 | 3,28 Gucy2f         | JUC0X00009841.mm.1 | -4,25  | 0,000251 | 0,28803  |                          |
| TC0X00003096.mm.1 | 3,28 Gucy2f         | PSR0X00019442.mm.1 | -5,36  | 0,001305 | 0,323504 | Cassette Exon 0,47       |
| TC1100002158.mm.1 | 2,57 Camk2b         | PSR1100021004.mm.1 | 2,28   | 0,00154  | 0,330388 | Cassette Exon 0,06       |
| TC1100002158.mm.1 | 2,57 Camk2b         | PSR1100021021.mm.1 | -2,17  | 0,027415 | 0,503961 | Cassette Exon 0,2        |
| TC1100002158.mm.1 | 2,57 Camk2b         | PSR1100021040.mm.1 | -2,24  | 0,032824 | 0,520896 | Alternative 5' Donc 0,24 |
| TC1100002158.mm.1 | 2,57 Camk2b         | PSR1100021028.mm.1 | -2,27  | 0,011607 | 0,429583 | Cassette Exon 0,27       |
| TC1100002158.mm.1 | 2,57 Camk2b         | JUC1100010960.mm.1 | -2,32  | 0,014985 | 0,452048 |                          |
| TC1100002158.mm.1 | 2,57 Camk2b         | PSR1100021016.mm.1 | -2,46  | 0,002428 | 0,349    | Cassette Exon 0,16       |
| TC1100002158.mm.1 | 2,57 Camk2b         | JUC1100010974.mm.1 | -2,55  | 0,039744 | 0,540494 |                          |
| TC1100002158.mm.1 | 2,57 Camk2b         | PSR1100021007.mm.1 | -2,56  | 0,023916 | 0,492316 | Cassette Exon 0,31       |
| TC1100002158.mm.1 | 2,57 Camk2b         | PSR1100021015.mm.1 | -2,56  | 0,042528 | 0,547845 | Cassette Exon 0,2        |
| TC1100002158.mm.1 | 2,57 Camk2b         | PSR1100021044.mm.1 | -2,58  | 0,043989 | 0,550776 | Cassette Exon 0,17       |
| TC1100002158.mm.1 | 2,57 Camk2b         | JUC1100010989.mm.1 | -2,62  | 0,029415 | 0,509995 |                          |
| TC1100002158.mm.1 | 2,57 Camk2b         | JUC1100010991.mm.1 | -2,63  | 0,032296 | 0,519116 |                          |
| TC1100002158.mm.1 | 2,57 Camk2b         | PSR1100021005.mm.1 | -2,76  | 0,009836 | 0,417839 | Intron Retention 0,44    |
| TC1100002158.mm.1 | 2,57 Camk2b         | PSR1100021042.mm.1 | -2,77  | 0,045111 | 0,553206 | Alternative 5' Donc 0,24 |

|                   |                          |                    |       |          |          |                     |      |
|-------------------|--------------------------|--------------------|-------|----------|----------|---------------------|------|
| TC1100002158.mm.1 | 2,57 Camk2b              | JUC1100010976.mm.1 | -2,79 | 0,04292  | 0,548271 |                     |      |
| TC1100002158.mm.1 | 2,57 Camk2b              | JUC1100010986.mm.1 | -2,79 | 0,04292  | 0,548271 |                     |      |
| TC1100002158.mm.1 | 2,57 Camk2b              | PSR1100021008.mm.1 | -3,49 | 0,020541 | 0,478308 | Cassette Exon       | 0,31 |
| TC1100002158.mm.1 | 2,57 Camk2b              | JUC1100010981.mm.1 | -3,66 | 0,037191 | 0,533252 |                     |      |
| TC1100002158.mm.1 | 2,57 Camk2b              | PSR1100021009.mm.1 | -4,05 | 0,011464 | 0,428022 | Cassette Exon       | 0,31 |
| TC1100002158.mm.1 | 2,57 Camk2b              | JUC1100010964.mm.1 | -4,1  | 0,002039 | 0,341377 |                     |      |
| TC1100002158.mm.1 | 2,57 Camk2b              | JUC1100010982.mm.1 | -4,92 | 0,011315 | 0,427133 |                     |      |
| TC0700003332.mm.1 | 2,97                     | PSR0700028623.mm.1 | 2,28  | 0,004624 | 0,369794 | Cassette Exon       | 0,02 |
| TC0700003332.mm.1 | 2,97                     | PSR0700028624.mm.1 | -2,28 | 0,004624 | 0,369794 | Cassette Exon       | 0,21 |
| TC0700003332.mm.1 | 2,97                     | JUC0700015154.mm.1 | -3,13 | 0,005099 | 0,375732 |                     |      |
| TC1000003007.mm.1 | 1,03 Cand1               | JUC1000012310.mm.1 | 2,28  | 0,044372 | 0,551441 |                     |      |
| TC1000003007.mm.1 | 1,03 Cand1               | PSR1000022471.mm.1 | -2,31 | 0,010432 | 0,421581 | Alternative 5' Donc | 0,2  |
| TC1300002773.mm.1 | -1,28 Zfp953; ZFP953     | PSR1300018651.mm.1 | 2,28  | 0,00346  | 0,355628 | Cassette Exon       | 0,14 |
| TC1900001137.mm.1 | -1,37 Ms4a6d             | PSR1900010674.mm.1 | 2,28  | 0,016316 | 0,45857  | Cassette Exon       | 0,12 |
| TC1900001137.mm.1 | -1,37 Ms4a6d             | PSR1900010675.mm.1 | 2,06  | 0,010806 | 0,424055 | Cassette Exon       | 0,13 |
| TC0100001677.mm.1 | 1,56 Gm7068              | PSR0100013874.mm.1 | 2,28  | 0,006349 | 0,389463 | Cassette Exon       | 0,12 |
| TC0400003446.mm.1 | -1,48 Zfp69              | PSR0400028000.mm.1 | 2,28  | 0,008207 | 0,405909 | Cassette Exon       | 0,12 |
| TC0400003446.mm.1 | -1,48 Zfp69              | PSR0400027998.mm.1 | 2,2   | 0,005359 | 0,378582 | Cassette Exon       | 0,12 |
| TC0900002486.mm.1 | -1,29 Smad6              | PSR0900020819.mm.1 | 2,28  | 0,002347 | 0,34761  | Cassette Exon       | 0,12 |
| TC0900002486.mm.1 | -1,29 Smad6              | JUC0900011733.mm.1 | -2,01 | 0,030363 | 0,512923 |                     |      |
| TC0500003444.mm.1 | 1,18                     | PSR0500031237.mm.1 | 2,28  | 0,030284 | 0,512627 | Cassette Exon       | 0,1  |
| TC0X00003003.mm.1 | -1,31 Nxf2               | JUC0X00009493.mm.1 | 2,28  | 0,033686 | 0,523549 |                     |      |
| TC0X00003003.mm.1 | -1,31 Nxf2               | PSR0X00018751.mm.1 | -2,02 | 0,008649 | 0,408463 | Cassette Exon       | 0,09 |
| TC1200002172.mm.1 | -1,09                    | JUC1200008295.mm.1 | 2,28  | 0,006244 | 0,388361 |                     |      |
| TC1700002692.mm.1 | 1,23 Calm2; Calm3; Calm1 | JUC1700013150.mm.1 | 2,28  | 0,023485 | 0,490681 |                     |      |
| TC0100002583.mm.1 | -1,62 Tmbim1             | JUC0100011802.mm.1 | 2,28  | 0,015037 | 0,452111 |                     |      |
| TC0100002212.mm.1 | -1,32 Lyg1               | JUC0100010111.mm.1 | 2,28  | 0,004762 | 0,371039 |                     |      |
| TC1700000901.mm.1 | 1,19 Pex6                | JUC1700004630.mm.1 | 2,28  | 0,006884 | 0,39438  |                     |      |
| TC1800001666.mm.1 | -1,11 Atp9b              | JUC1800006666.mm.1 | 2,28  | 0,015681 | 0,455416 |                     |      |
| TC0200002264.mm.1 | -1,31 Sdcbp2             | JUC0200008905.mm.1 | 2,28  | 0,024038 | 0,493014 |                     |      |
| TC1600000960.mm.1 | -1,37 4930590A17Rik      | JUC1600003949.mm.1 | 2,28  | 0,041096 | 0,543933 |                     |      |
| TC0500002628.mm.1 | 1,07 Clock               | JUC0500012651.mm.1 | 2,28  | 0,044841 | 0,552566 |                     |      |
| TC1100001150.mm.1 | -1,42 Proca1             | JUC1100005548.mm.1 | 2,28  | 0,000229 | 0,28803  |                     |      |
| TC1000002491.mm.1 | 1,3 Dos                  | JUC1000010085.mm.1 | 2,28  | 0,001159 | 0,317849 |                     |      |
| TC1000002491.mm.1 | 1,3 Dos                  | JUC1000010081.mm.1 | -2,23 | 0,026914 | 0,502518 |                     |      |
| TC0300001816.mm.1 | 1,1 Ccdc39               | JUC0300007412.mm.1 | 2,28  | 0,016601 | 0,459739 |                     |      |
| TC0400002633.mm.1 | -1,27 Acnat2             | JUC0400011113.mm.1 | 2,28  | 0,043108 | 0,548605 |                     |      |
| TC0700002759.mm.1 | 8,54 Aplp1               | PSR0700024471.mm.1 | 2,27  | 0,02097  | 0,480007 | Cassette Exon       | 0,08 |
| TC0700002759.mm.1 | 8,54 Aplp1               | PSR0700024475.mm.1 | -6,62 | 0,039236 | 0,538862 | Cassette Exon       | 0,37 |
| TC1400001745.mm.1 | 5,79 Cdhr1               | JUC1400007434.mm.1 | 2,27  | 0,007393 | 0,399627 |                     |      |
| TC1400001745.mm.1 | 5,79 Cdhr1               | JUC1400007431.mm.1 | 2,15  | 0,004511 | 0,368648 |                     |      |
| TC1400001745.mm.1 | 5,79 Cdhr1               | JUC1400007432.mm.1 | -2,65 | 0,000374 | 0,291853 |                     |      |
| TC1400001745.mm.1 | 5,79 Cdhr1               | PSR1400013595.mm.1 | -7,08 | 0,005948 | 0,385276 | Alternative 5' Donc | 0,34 |
| TC0600000784.mm.1 | 2,49 A430010J10Rik       | PSR0600005860.mm.1 | 2,27  | 0,003498 | 0,355638 | Cassette Exon       | 0,17 |
| TC0600000784.mm.1 | 2,49 A430010J10Rik       | JUC0600002932.mm.1 | 2,17  | 0,033907 | 0,52424  |                     |      |
| TC0600000784.mm.1 | 2,49 A430010J10Rik       | PSR0600005858.mm.1 | -2,15 | 0,011916 | 0,431651 | Cassette Exon       | 0,11 |
| TC0600000784.mm.1 | 2,49 A430010J10Rik       | PSR0600005867.mm.1 | -2,19 | 0,035941 | 0,529399 | Cassette Exon       | 0,11 |
| TC0600000784.mm.1 | 2,49 A430010J10Rik       | PSR0600005863.mm.1 | -2,48 | 0,001597 | 0,332399 | Alternative 5' Donc | 0,22 |

|                   |       |                       |                    |       |          |          |                     |      |
|-------------------|-------|-----------------------|--------------------|-------|----------|----------|---------------------|------|
| TC0600000784.mm.1 | 2,49  | A430010J10Rik         | PSR0600005862.mm.1 | -2,6  | 0,000964 | 0,313363 | Alternative 5' Donc | 0,22 |
| TC0600000784.mm.1 | 2,49  | A430010J10Rik         | PSR0600005859.mm.1 | -2,64 | 0,000849 | 0,311909 | Alternative 3' Acce | 0,26 |
| TC0600000784.mm.1 | 2,49  | A430010J10Rik         | PSR0600005864.mm.1 | -2,82 | 0,008132 | 0,405267 | Alternative 5' Donc | 0,22 |
| TC0600000784.mm.1 | 2,49  | A430010J10Rik         | PSR0600005865.mm.1 | -3,1  | 0,03151  | 0,516965 | Cassette Exon       | 0,24 |
| TC1200002006.mm.1 | 2,96  | Ccdc177               | PSR1200013801.mm.1 | 2,27  | 0,015882 | 0,456526 | Alternative 3' Acce | 0,17 |
| TC1200002006.mm.1 | 2,96  | Ccdc177               | PSR1200013805.mm.1 | -2,58 | 0,008451 | 0,406611 | Cassette Exon       | 0,22 |
| TC1200002006.mm.1 | 2,96  | Ccdc177               | PSR1200013806.mm.1 | -3,38 | 0,000011 | 0,179072 | Cassette Exon       | 0,22 |
| TC0200003670.mm.1 | -1,42 | Galnt3                | PSR0200031278.mm.1 | 2,27  | 0,00123  | 0,322251 | Alternative 5' Donc | 0,2  |
| TC0900002452.mm.1 | -1,45 | Paqr5                 | PSR0900020555.mm.1 | 2,27  | 0,047437 | 0,558338 | Alternative 5' Donc | 0,19 |
| TC1700000657.mm.1 | -1,42 | Lsm2                  | PSR1700006566.mm.1 | 2,27  | 0,026006 | 0,499257 | Alternative 3' Acce | 0,19 |
| TC1700000657.mm.1 | -1,42 | Lsm2                  | JUC1700003630.mm.1 | 2,16  | 0,002593 | 0,349501 |                     |      |
| TC1400000899.mm.1 | -1,03 | Fam167a               | PSR1400007219.mm.1 | 2,27  | 0,017394 | 0,463736 | Alternative 3' Acce | 0,18 |
| TC1400001487.mm.1 | -1,6  | Rarb                  | PSR1400011138.mm.1 | 2,27  | 0,009977 | 0,418456 | Alternative 3' Acce | 0,17 |
| TC1600001593.mm.1 | -1,35 | Ndufb4; Gm3873; Gm324 | PSR1600013054.mm.1 | 2,27  | 0,024192 | 0,493294 | Cassette Exon       | 0,16 |
| TC1100002975.mm.1 | 1,35  | Arhgap44              | PSR1100026979.mm.1 | 2,27  | 0,002163 | 0,344238 | Cassette Exon       | 0,15 |
| TC1100002975.mm.1 | 1,35  | Arhgap44              | JUC1100014062.mm.1 | 2,23  | 0,007096 | 0,396897 |                     |      |
| TC0400004224.mm.1 | -1,04 | Ephb2                 | PSR0400031266.mm.1 | 2,27  | 0,03361  | 0,523309 | Cassette Exon       | 0,14 |
| TC0700001410.mm.1 | -1,68 | Coa4                  | PSR0700012052.mm.1 | 2,27  | 0,044414 | 0,551538 | Cassette Exon       | 0,14 |
| TC0700001838.mm.1 | 1,11  | Zfp553                | PSR0700015737.mm.1 | 2,27  | 0,040219 | 0,541714 | Cassette Exon       | 0,13 |
| TC0900003095.mm.1 | -1,37 | Fbxw27                | PSR0900026142.mm.1 | 2,27  | 0,004212 | 0,363236 | Cassette Exon       | 0,13 |
| TC0900003095.mm.1 | -1,37 | Fbxw27                | JUC0900014676.mm.1 | 2,05  | 0,029499 | 0,510123 |                     |      |
| TC0500003138.mm.1 | 1,69  | Rnft2                 | JUC0500015195.mm.1 | 2,27  | 0,022445 | 0,487003 |                     |      |
| TC0500003138.mm.1 | 1,69  | Rnft2                 | JUC0500015194.mm.1 | 2,21  | 0,007958 | 0,403853 |                     |      |
| TC0500003138.mm.1 | 1,69  | Rnft2                 | PSR0500027925.mm.1 | -2,27 | 0,012495 | 0,435429 | Cassette Exon       | 0,12 |
| TC1800001510.mm.1 | 1,21  | Cep76                 | PSR1800011095.mm.1 | 2,27  | 0,007531 | 0,40125  | Cassette Exon       | 0,06 |
| TC1400000320.mm.1 | 1,23  | Pbrm1                 | JUC1400001603.mm.1 | 2,27  | 0,03222  | 0,518925 |                     |      |
| TC1400000320.mm.1 | 1,23  | Pbrm1                 | JUC1400001621.mm.1 | 2,11  | 0,001835 | 0,337414 |                     |      |
| TC1400000320.mm.1 | 1,23  | Pbrm1                 | JUC1400001620.mm.1 | -4,38 | 0,015671 | 0,455416 |                     |      |
| TC1100003808.mm.1 | 1,05  | Brca1                 | JUC1100018459.mm.1 | 2,27  | 0,019924 | 0,475902 |                     |      |
| TC0300000828.mm.1 | -1,55 | Sprr2h                | PSR0300006409.mm.1 | 2,27  | 0,022988 | 0,488935 |                     |      |
| TC1300002048.mm.1 | 1,28  | Uimc1                 | JUC1300006638.mm.1 | 2,27  | 0,021085 | 0,480371 |                     |      |
| TC1300002702.mm.1 | -1,05 | A430090L17Rik         | JUC1300009819.mm.1 | 2,27  | 0,01947  | 0,474209 |                     |      |
| TC1300000730.mm.1 | -1,07 | A530065N20Rik         | JUC1300002527.mm.1 | 2,27  | 0,012456 | 0,43528  |                     |      |
| TC1700001791.mm.1 | 1,03  | Ccdc167               | JUC1700008896.mm.1 | 2,27  | 0,047288 | 0,558242 |                     |      |
| TC1500001676.mm.1 | -1,03 | Col22a1               | JUC1500007137.mm.1 | 2,27  | 0,007932 | 0,403819 |                     |      |
| TC1500001676.mm.1 | -1,03 | Col22a1               | JUC1500007153.mm.1 | 2,12  | 0,028537 | 0,507479 |                     |      |
| TC1500001676.mm.1 | -1,03 | Col22a1               | JUC1500007139.mm.1 | -2,46 | 0,002457 | 0,349135 |                     |      |
| TC1600000042.mm.1 | 1,45  | 4930451G09Rik         | JUC1600000182.mm.1 | 2,27  | 0,006962 | 0,395722 |                     |      |
| TC0700004571.mm.1 | -1,38 | Igf2                  | JUC0700020291.mm.1 | 2,27  | 0,032463 | 0,519612 |                     |      |
| TC0700000819.mm.1 | -1,18 | Akt1s1; Mir707        | PSR0700006843.mm.1 | 2,27  | 0,025015 | 0,496061 |                     |      |
| TC0700000819.mm.1 | -1,18 | Akt1s1; Mir707        | JUC0700003399.mm.1 | 2,04  | 0,028206 | 0,506368 |                     |      |
| TC0700000879.mm.1 | -1,11 | Gtf2h1                | JUC0700003937.mm.1 | 2,27  | 0,003284 | 0,354243 |                     |      |
| TC0700003570.mm.1 | -1,85 | Anpep                 | JUC0700015930.mm.1 | 2,27  | 0,028205 | 0,506368 |                     |      |
| TC1100001779.mm.1 | -1,16 |                       | JUC1100008749.mm.1 | 2,27  | 0,011478 | 0,428022 |                     |      |
| TC0400002837.mm.1 | 1,7   | Brinp1; Dbc1          | JUC0400012103.mm.1 | 2,27  | 0,011613 | 0,429617 |                     |      |
| TC0900002374.mm.1 | 1,26  | Mpi                   | JUC0900011207.mm.1 | 2,27  | 0,034846 | 0,526823 |                     |      |
| TC0900002374.mm.1 | 1,26  | Mpi                   | JUC0900011211.mm.1 | -2,87 | 0,004582 | 0,369794 |                     |      |
| TC1800000184.mm.1 | 2,38  | Mapre2                | JUC1800000783.mm.1 | 2,26  | 0,000434 | 0,297771 |                     |      |

|                   |       |                          |                    |       |          |          |                     |      |
|-------------------|-------|--------------------------|--------------------|-------|----------|----------|---------------------|------|
| TC1800000184.mm.1 | 2,38  | Mapre2                   | PSR1800001322.mm.1 | -2,86 | 0,047482 | 0,558611 | Cassette Exon       | 0,38 |
| TC1800000184.mm.1 | 2,38  | Mapre2                   | JUC1800000774.mm.1 | -2,9  | 0,038221 | 0,535805 |                     |      |
| TC1800000184.mm.1 | 2,38  | Mapre2                   | JUC1800000781.mm.1 | -4,21 | 0,020589 | 0,478531 |                     |      |
| TC1800000184.mm.1 | 2,38  | Mapre2                   | JUC1800000782.mm.1 | -5,75 | 0,00579  | 0,383104 |                     |      |
| TC0100000363.mm.1 | -1,17 |                          | PSR0100002815.mm.1 | 2,26  | 0,00518  | 0,376851 | Alternative 3' Acce | 0,2  |
| TC1000003106.mm.1 | 13,68 | Kif5a                    | PSR1000023184.mm.1 | 2,26  | 0,036703 | 0,531756 | Cassette Exon       | 0,2  |
| TC1000003106.mm.1 | 13,68 | Kif5a                    | PSR1000023165.mm.1 | -2,06 | 0,0482   | 0,56017  |                     |      |
| TC1100000302.mm.1 | 1,49  | Rtn4                     | PSR1100002556.mm.1 | 2,26  | 0,048359 | 0,56056  | Alternative 3' Acce | 0,2  |
| TC0700003036.mm.1 | -1,09 | Tph1                     | PSR0700027708.mm.1 | 2,26  | 0,001553 | 0,330671 | Alternative 5' Donc | 0,18 |
| TC1800001682.mm.1 | 1,21  | Zfp236                   | JUC1800006724.mm.1 | 2,26  | 0,018624 | 0,46991  |                     |      |
| TC1800001682.mm.1 | 1,21  | Zfp236                   | PSR1800012048.mm.1 | -2,11 | 0,03667  | 0,531675 | Alternative 5' Donc | 0,18 |
| TC0X00003041.mm.1 | 1,53  | Rab9b                    | PSR0X00019050.mm.1 | 2,26  | 0,003161 | 0,353901 | Cassette Exon       | 0,16 |
| TC0600003342.mm.1 | -1,1  | Eps8                     | PSR0600026271.mm.1 | 2,26  | 0,022722 | 0,487767 | Cassette Exon       | 0,15 |
| TC0500003329.mm.1 | -1,21 | Auts2                    | PSR0500030147.mm.1 | 2,26  | 0,045477 | 0,554304 | Cassette Exon       | 0,14 |
| TC0500003329.mm.1 | -1,21 | Auts2                    | PSR0500030133.mm.1 | -2,28 | 0,000147 | 0,272178 |                     |      |
| TC0500003418.mm.1 | -1,26 | Cux1                     | PSR0500030960.mm.1 | 2,26  | 0,038937 | 0,537874 | Cassette Exon       | 0,14 |
| TC0200002588.mm.1 | -1,25 | Rnf114                   | PSR0200021338.mm.1 | 2,26  | 0,001305 | 0,323504 | Cassette Exon       | 0,12 |
| TC0800003242.mm.1 | -1,41 | Trim61; Trim60           | PSR0800017514.mm.1 | 2,26  | 0,007362 | 0,39938  | Cassette Exon       | 0,12 |
| TC0X00002046.mm.1 | -1,34 | Gm14569                  | PSR0X00012970.mm.1 | 2,26  | 0,035871 | 0,529376 | Cassette Exon       | 0,12 |
| TC1100003858.mm.1 | 1,71  | C1ql1                    | PSR1100036021.mm.1 | 2,26  | 0,027102 | 0,503022 | Cassette Exon       | 0,12 |
| TC0500000591.mm.1 | -1,32 | Tbc1d1                   | JUC0500002919.mm.1 | 2,26  | 0,033772 | 0,523738 |                     |      |
| TC0500000591.mm.1 | -1,32 | Tbc1d1                   | PSR0500005221.mm.1 | 2,14  | 0,005794 | 0,383104 | Cassette Exon       | 0,11 |
| TC0X00000730.mm.1 | 1,17  | Xlr3e-ps                 | PSR0X00005046.mm.1 | 2,26  | 0,006809 | 0,393777 | Cassette Exon       | 0,11 |
| TC0900002811.mm.1 | -1,35 | Gm2396                   | JUC0900013057.mm.1 | 2,26  | 0,011189 | 0,426444 |                     |      |
| TC0900002811.mm.1 | -1,35 | Gm2396                   | PSR0900023319.mm.1 | 2,01  | 0,009952 | 0,41841  | Cassette Exon       | 0,1  |
| TC0300000030.mm.1 | -1,3  |                          | JUC0300000047.mm.1 | 2,26  | 0,007014 | 0,395741 |                     |      |
| TC1100003935.mm.1 | 2,6   | Ddx5; Mir3064; Gm25994   | JUC1100019302.mm.1 | 2,26  | 0,0053   | 0,378059 |                     |      |
| TC0200004297.mm.1 | -1    | Mettl15                  | JUC0200018396.mm.1 | 2,26  | 0,011183 | 0,426414 |                     |      |
| TC1300002151.mm.1 | -1,37 | Cts7                     | JUC1300007179.mm.1 | 2,26  | 0,025262 | 0,496939 |                     |      |
| TC0200004775.mm.1 | 1,14  | Crnk1                    | JUC0200021163.mm.1 | 2,26  | 0,015204 | 0,452738 |                     |      |
| TC1700002665.mm.1 | -1,27 | Srbd1                    | JUC1700013089.mm.1 | 2,26  | 0,023471 | 0,490635 |                     |      |
| TC1700002665.mm.1 | -1,27 | Srbd1                    | JUC1700013093.mm.1 | 2,14  | 0,040728 | 0,542962 |                     |      |
| TC1700001383.mm.1 | -1,29 | Tulp4; LOC101055731; Syt | JUC1700006774.mm.1 | 2,26  | 0,038303 | 0,536106 |                     |      |
| TC1700000924.mm.1 | -1,02 | Tfeb                     | JUC1700004755.mm.1 | 2,26  | 0,012492 | 0,435429 |                     |      |
| TC1900001697.mm.1 | -1,06 |                          | JUC1900008298.mm.1 | 2,26  | 0,038945 | 0,537874 |                     |      |
| TC0100001866.mm.1 | -1,62 | 1700065J18Rik            | JUC0100008797.mm.1 | 2,26  | 0,045413 | 0,554105 |                     |      |
| TC0200001782.mm.1 | 1,12  | Mga                      | JUC0200006709.mm.1 | 2,26  | 0,048148 | 0,559995 |                     |      |
| TC1500000821.mm.1 | 1,14  | Ppara                    | JUC1500003621.mm.1 | 2,26  | 0,042993 | 0,548409 |                     |      |
| TC1600001080.mm.1 | -2,03 | Sh3bgr                   | JUC1600004443.mm.1 | 2,26  | 0,049317 | 0,56273  |                     |      |
| TC1600001080.mm.1 | -2,03 | Sh3bgr                   | JUC1600004447.mm.1 | 2,25  | 0,043569 | 0,550033 |                     |      |
| TC0700004555.mm.1 | 1,03  |                          | JUC0700020251.mm.1 | 2,26  | 0,027613 | 0,504579 |                     |      |
| TC0900000923.mm.1 | -1,38 | Gtf2a2                   | JUC0900003874.mm.1 | 2,26  | 0,004153 | 0,3623   |                     |      |
| TC0600000735.mm.1 | 1,31  | Grid2                    | JUC0600002833.mm.1 | 2,26  | 0,028918 | 0,50858  |                     |      |
| TC0600003469.mm.1 | 1,44  | Caprin2                  | JUC0600014407.mm.1 | 2,26  | 0,026262 | 0,500408 |                     |      |
| TC1100000343.mm.1 | -1,05 | Stk10                    | JUC1100001535.mm.1 | 2,26  | 0,008001 | 0,403872 |                     |      |
| TC1100000435.mm.1 | -1,38 | Gm12153                  | JUC1100001786.mm.1 | 2,26  | 0,014075 | 0,446841 |                     |      |
| TC0400000501.mm.1 | 1,15  | Ncbp1                    | JUC0400001815.mm.1 | 2,26  | 0,048394 | 0,56064  |                     |      |
| TC1100002967.mm.1 | -1,07 | Cox10                    | JUC1100014041.mm.1 | 2,26  | 0,011244 | 0,426718 |                     |      |

|                   |                         |                    |       |          |          |                          |
|-------------------|-------------------------|--------------------|-------|----------|----------|--------------------------|
| TC1100002165.mm.1 | -1,14 Npc1l1            | JUC1100011016.mm.1 | 2,26  | 0,037576 | 0,534053 |                          |
| TCOX00001601.mm.1 | -1,59 Smpx              | JUCOX00005065.mm.1 | 2,26  | 0,037516 | 0,533968 |                          |
| TCOX00001690.mm.1 | -1,66 Gm15228           | JUCOX00005505.mm.1 | 2,26  | 0,037857 | 0,534808 |                          |
| TCOX00001336.mm.1 | 1,14 BC065397; Gm15009  | JUCOX00004120.mm.1 | 2,26  | 0,014364 | 0,448293 |                          |
| TC0900002915.mm.1 | -1,24 Pik3cb            | JUC0900013414.mm.1 | 2,26  | 0,000294 | 0,288663 |                          |
| TC0900002915.mm.1 | -1,24 Pik3cb            | JUC0900013395.mm.1 | 2,16  | 0,046079 | 0,555658 |                          |
| TC0900002588.mm.1 | -1,31 Fam81a            | JUC0900012111.mm.1 | 2,26  | 0,018921 | 0,471305 |                          |
| TC1000000147.mm.1 | -1,05 Map3k5            | JUC1000000535.mm.1 | 2,26  | 0,005135 | 0,376442 |                          |
| TC0400001407.mm.1 | -1,33 LOC101056089      | JUC0400005524.mm.1 | 2,26  | 0,032166 | 0,518706 |                          |
| TC0400002721.mm.1 | -1,26 1700042G15Rik     | JUC0400011433.mm.1 | 2,26  | 0,009988 | 0,418456 |                          |
| TC1100000264.mm.1 | -1,39 Fandl             | PSR1100002254.mm.1 | 2,25  | 0,017325 | 0,463398 | Cassette Exon 0,1        |
| TC1100000264.mm.1 | -1,39 Fandl             | PSR1100002261.mm.1 | 2,01  | 0,024165 | 0,493245 | Intron Retention 0,25    |
| TC0200002311.mm.1 | -1,52                   | PSR0200018158.mm.1 | 2,25  | 0,018275 | 0,468049 | Alternative 5' Donc 0,2  |
| TC0100001985.mm.1 | -1,71 Eya1              | PSR0100016240.mm.1 | 2,25  | 0,003199 | 0,354243 | Cassette Exon 0,18       |
| TC0700000014.mm.1 | -1,68 Ndufa3            | PSR0700000122.mm.1 | 2,25  | 0,03262  | 0,520338 | Intron Retention 0,18    |
| TC1200000524.mm.1 | 1,51 Prpf39             | PSR1200003648.mm.1 | 2,25  | 0,02919  | 0,509374 | Cassette Exon 0,18       |
| TC0800001507.mm.1 | 1,48 Spg7               | PSR0800012263.mm.1 | 2,25  | 0,01449  | 0,449409 | Cassette Exon 0,13       |
| TC0800001507.mm.1 | 1,48 Spg7               | PSR0800012290.mm.1 | -2,13 | 0,03113  | 0,51548  | Alternative 5' Donc 0,17 |
| TC0800001507.mm.1 | 1,48 Spg7               | JUC0800006701.mm.1 | -2,17 | 0,007496 | 0,400809 |                          |
| TC0200004283.mm.1 | -1,22 Arl14ep           | PSR0200035995.mm.1 | 2,25  | 0,045675 | 0,554833 | Cassette Exon 0,16       |
| TC1100001661.mm.1 | -1,8 Tmem106a           | JUC1100008115.mm.1 | 2,25  | 0,016388 | 0,458738 |                          |
| TC1100001661.mm.1 | -1,8 Tmem106a           | PSR1100015638.mm.1 | 2,13  | 0,006385 | 0,389571 | Alternative 5' Donc 0,16 |
| TC1800000071.mm.1 | -1,03 Thoc1             | JUC1800000218.mm.1 | 2,25  | 0,027081 | 0,502997 |                          |
| TC1800000071.mm.1 | -1,03 Thoc1             | PSR1800000424.mm.1 | 2,13  | 0,034848 | 0,526823 | Cassette Exon 0,16       |
| TC1000000326.mm.1 | 1,53 Fyn                | JUC1000001196.mm.1 | 2,25  | 0,002398 | 0,348564 |                          |
| TC1000000326.mm.1 | 1,53 Fyn                | PSR1000002167.mm.1 | -2,21 | 0,031836 | 0,517856 | Cassette Exon 0,14       |
| TC1000000326.mm.1 | 1,53 Fyn                | PSR1000002196.mm.1 | -2,31 | 0,021045 | 0,480262 | Alternative 5' Donc 0,15 |
| TC1000000326.mm.1 | 1,53 Fyn                | JUC1000001188.mm.1 | -2,43 | 0,049926 | 0,56393  |                          |
| TC0600000386.mm.1 | 1,43 Clec2l             | PSR0600002959.mm.1 | 2,25  | 0,037116 | 0,532942 | Cassette Exon 0,12       |
| TC1700001315.mm.1 | -1,13 Msh6              | PSR1700012009.mm.1 | 2,25  | 0,035972 | 0,529465 | Cassette Exon 0,12       |
| TC0100001493.mm.1 | -1,07 Scyl3             | PSR0100012252.mm.1 | 2,25  | 0,000442 | 0,297771 | Cassette Exon 0,11       |
| TC0400003366.mm.1 | -1,24 Kif2c             | PSR0400026963.mm.1 | 2,25  | 0,031618 | 0,517391 | Cassette Exon 0,11       |
| TC1500000668.mm.1 | -1,19 Gm10863           | PSR1500005006.mm.1 | 2,25  | 0,035981 | 0,529491 | Cassette Exon 0,11       |
| TC1600000654.mm.1 | 1,53 Spice1             | JUC1600002936.mm.1 | 2,25  | 0,031511 | 0,516965 |                          |
| TC1600000654.mm.1 | 1,53 Spice1             | PSR1600005693.mm.1 | 2,17  | 0,028452 | 0,507299 | Cassette Exon 0,11       |
| TC1600000654.mm.1 | 1,53 Spice1             | PSR1600005704.mm.1 | -2,09 | 0,010734 | 0,423745 | Cassette Exon 0,11       |
| TC1600000654.mm.1 | 1,53 Spice1             | JUC1600002938.mm.1 | -2,26 | 0,003643 | 0,356894 |                          |
| TC1400000465.mm.1 | -1,23 Gm8232; Gm21991   | JUC1400002282.mm.1 | 2,25  | 0,01899  | 0,471485 |                          |
| TC0300000323.mm.1 | -1,14 D3Erttd751e       | PSR0300002418.mm.1 | 2,25  | 0,030366 | 0,512923 |                          |
| TC1200002581.mm.1 | -1,34 Igh-V11; Ighv11-2 | JUC1200010369.mm.1 | 2,25  | 0,001399 | 0,325997 |                          |
| TC0200004555.mm.1 | -1,44 Fahd2a            | JUC0200020198.mm.1 | 2,25  | 0,026522 | 0,501411 |                          |
| TC0200004555.mm.1 | -1,44 Fahd2a            | JUC0200020197.mm.1 | 2,05  | 0,016957 | 0,461296 |                          |
| TC1700001166.mm.1 | -1,01 Ltbp1             | JUC1700006063.mm.1 | 2,25  | 0,02159  | 0,48325  |                          |
| TC1700001166.mm.1 | -1,01 Ltbp1             | JUC1700006059.mm.1 | -3,44 | 0,000644 | 0,304044 |                          |
| TC0100001862.mm.1 | -1,3 Gm10516            | JUC0100008781.mm.1 | 2,25  | 0,017398 | 0,46374  |                          |
| TC0500001888.mm.1 | -1,01 Ankib1            | JUC0500009471.mm.1 | 2,25  | 0,02496  | 0,495932 |                          |
| TC0600000410.mm.1 | -1 Ssbp1                | JUC0600001597.mm.1 | 2,25  | 0,016788 | 0,460623 |                          |
| TC0300003000.mm.1 | -1,39 1700030L20Rik     | JUC0300012373.mm.1 | 2,25  | 0,048076 | 0,559803 |                          |

|                   |                            |                    |       |          |                              |      |
|-------------------|----------------------------|--------------------|-------|----------|------------------------------|------|
| TC1100001698.mm.1 | 1,31 Adam11                | JUC1100008300.mm.1 | 2,25  | 0,012156 | 0,432923                     |      |
| TC1100001698.mm.1 | 1,31 Adam11                | JUC1100008290.mm.1 | -2,45 | 0,000543 | 0,304044                     |      |
| TC1100001247.mm.1 | -1,3 Ap2b1                 | JUC1100006118.mm.1 | 2,25  | 0,026195 | 0,50003                      |      |
| TC0400003327.mm.1 | 1,26 Faah                  | JUC0400013826.mm.1 | 2,25  | 0,046308 | 0,556186                     |      |
| TC0400003327.mm.1 | 1,26 Faah                  | PSR0400026487.mm.1 | -2,01 | 0,041914 | 0,545811                     |      |
| TC0400003327.mm.1 | 1,26 Faah                  | JUC0400013815.mm.1 | -2,02 | 0,019155 | 0,472667                     |      |
| TC0400002757.mm.1 | -1,67 Ptbp3                | JUC0400011640.mm.1 | 2,25  | 0,013332 | 0,44185                      |      |
| TC1400000365.mm.1 | 5,2 Rbp3                   | JUC1400001938.mm.1 | 2,24  | 0,028728 | 0,508141                     |      |
| TC1400000365.mm.1 | 5,2 Rbp3                   | PSR1400003246.mm.1 | -5,41 | 0,022816 | 0,488253 Alternative 3' Acce | 0,48 |
| TC0600001508.mm.1 | -1,64 Foxm1; 4933413G19Rik | JUC0600006483.mm.1 | 2,24  | 0,00455  | 0,36886                      |      |
| TC0600001508.mm.1 | -1,64 Foxm1; 4933413G19Rik | PSR0600012294.mm.1 | 2,21  | 0,005295 | 0,378059 Alternative 5' Donc | 0,2  |
| TC0600001508.mm.1 | -1,64 Foxm1; 4933413G19Rik | PSR0600012285.mm.1 | 2,02  | 0,001608 | 0,332831 Alternative 3' Acce | 0,16 |
| TC0400000213.mm.1 | -1,37 Gpr63; Gm11906       | PSR0400001401.mm.1 | 2,24  | 0,047874 | 0,559408 Alternative 5' Donc | 0,19 |
| TC1300001934.mm.1 | -1,58 A330033J07Rik        | PSR1300012041.mm.1 | 2,24  | 0,000308 | 0,288663 Alternative 3' Acce | 0,19 |
| TC0700001280.mm.1 | -1,5 Sytl2                 | JUC0700005705.mm.1 | 2,24  | 0,025513 | 0,497664                     |      |
| TC0700001280.mm.1 | -1,5 Sytl2                 | PSR0700011055.mm.1 | 2,13  | 0,048064 | 0,55976 Alternative 3' Acce  | 0,18 |
| TC1900000170.mm.1 | -1,15 Eef1g; LOC101055956  | PSR1900002344.mm.1 | 2,24  | 0,038744 | 0,537366 Alternative 5' Donc | 0,18 |
| TC1300001075.mm.1 | -1,08 Zbed3                | PSR1300006855.mm.1 | 2,24  | 0,024421 | 0,493848 Alternative 3' Acce | 0,16 |
| TC0400003587.mm.1 | -1,86 C77080               | PSR0400029231.mm.1 | 2,24  | 0,038043 | 0,535548 Cassette Exon       | 0,15 |
| TC1600001704.mm.1 | -1,33 Gm4827               | JUC1600007246.mm.1 | 2,24  | 0,047029 | 0,557783                     |      |
| TC1600001704.mm.1 | -1,33 Gm4827               | PSR1600013897.mm.1 | 2,07  | 0,009702 | 0,417746 Cassette Exon       | 0,15 |
| TC1700000382.mm.1 | 2,75 Gng13                 | PSR1700003184.mm.1 | 2,24  | 0,003698 | 0,357266 Cassette Exon       | 0,09 |
| TC1700000382.mm.1 | 2,75 Gng13                 | PSR1700003182.mm.1 | -2,34 | 0,029862 | 0,511132 Cassette Exon       | 0,14 |
| TC0400001070.mm.1 | -1,25 Oma1                 | PSR0400007333.mm.1 | 2,24  | 0,020578 | 0,478502 Cassette Exon       | 0,13 |
| TC0800002039.mm.1 | 1,09 Tnks                  | PSR0800015919.mm.1 | 2,24  | 0,019146 | 0,472526 Cassette Exon       | 0,11 |
| TC0X00001100.mm.1 | -1,41                      | PSR0X00007252.mm.1 | 2,24  | 0,038103 | 0,535659 Cassette Exon       | 0,11 |
| TC1700001719.mm.1 | -1,29 9630028I04Rik        | PSR1700015910.mm.1 | 2,24  | 0,000209 | 0,28803 Cassette Exon        | 0,11 |
| TC1800001243.mm.1 | 1,05 Nr3c1                 | PSR1800009242.mm.1 | 2,24  | 0,012471 | 0,435343 Cassette Exon       | 0,11 |
| TC1800001243.mm.1 | 1,05 Nr3c1                 | JUC1800005137.mm.1 | 2,21  | 0,001281 | 0,322251                     |      |
| TC0200003423.mm.1 | -1,13 Nr5a1                | JUC0200014806.mm.1 | 2,24  | 0,01493  | 0,451919                     |      |
| TC1300001087.mm.1 | 1,56 Poc5                  | JUC1300003606.mm.1 | 2,24  | 0,049293 | 0,562691                     |      |
| TC0100001804.mm.1 | 1,05 Gpatch2; Gm21710      | JUC0100008519.mm.1 | 2,24  | 0,04772  | 0,55896                      |      |
| TC1600001375.mm.1 | -1,03 Igf2bp2              | JUC1600005920.mm.1 | 2,24  | 0,04401  | 0,550779                     |      |
| TC1600001163.mm.1 | -1,65                      | JUC1600004866.mm.1 | 2,24  | 0,035345 | 0,528451                     |      |
| TC0800000653.mm.1 | -1,17 Sh3rf1               | JUC0800002361.mm.1 | 2,24  | 0,049747 | 0,563579                     |      |
| TC0800002409.mm.1 | -1,24 Kcnn1                | JUC0800009976.mm.1 | 2,24  | 0,008186 | 0,40568                      |      |
| TC0800002934.mm.1 | 1,14 Ddx19a                | JUC0800012323.mm.1 | 2,24  | 0,024052 | 0,493026                     |      |
| TC0700000528.mm.1 | 1,23 Dpf1                  | JUC0700002267.mm.1 | 2,24  | 0,046077 | 0,555658                     |      |
| TC0700000528.mm.1 | 1,23 Dpf1                  | JUC0700002276.mm.1 | 2,21  | 0,016609 | 0,459827                     |      |
| TC0700000528.mm.1 | 1,23 Dpf1                  | JUC0700002281.mm.1 | -2,24 | 0,027652 | 0,50467                      |      |
| TC0700000528.mm.1 | 1,23 Dpf1                  | JUC0700002272.mm.1 | -2,76 | 0,007243 | 0,39826                      |      |
| TC0600002763.mm.1 | 1,31 Magi1                 | JUC0600011174.mm.1 | 2,24  | 0,02608  | 0,499688                     |      |
| TC1100002575.mm.1 | -1,07 Adra1b               | JUC1100012376.mm.1 | 2,24  | 0,039383 | 0,539438                     |      |
| TC0400002605.mm.1 | -1,06 Tbc1d2               | JUC0400011017.mm.1 | 2,24  | 0,001549 | 0,330631                     |      |
| TC0400002580.mm.1 | -1,28 Shb                  | JUC0400010913.mm.1 | 2,24  | 0,044066 | 0,55088                      |      |
| TC0400002069.mm.1 | -1,44 2610002J02Rik        | JUC0400008991.mm.1 | 2,24  | 0,011181 | 0,426414                     |      |
| TC1100003999.mm.1 | 2,88 Abca8a                | JUC1100019608.mm.1 | 2,23  | 0,000085 | 0,255472                     |      |
| TC1100003999.mm.1 | 2,88 Abca8a                | JUC1100019616.mm.1 | -2,06 | 0,001144 | 0,317344                     |      |

|                   |              |                    |        |          |          |                     |      |
|-------------------|--------------|--------------------|--------|----------|----------|---------------------|------|
| TC1100003999.mm.1 | 2,88 Abca8a  | JUC1100019593.mm.1 | -2,12  | 0,000454 | 0,298307 |                     |      |
| TC1100003999.mm.1 | 2,88 Abca8a  | PSR1100037483.mm.1 | -2,24  | 0,034404 | 0,525784 | Cassette Exon       | 0,15 |
| TC1100003999.mm.1 | 2,88 Abca8a  | JUC1100019604.mm.1 | -2,32  | 0,025788 | 0,498505 |                     |      |
| TC1100003999.mm.1 | 2,88 Abca8a  | JUC1100019618.mm.1 | -2,36  | 0,036891 | 0,532257 |                     |      |
| TC1100003999.mm.1 | 2,88 Abca8a  | PSR1100037515.mm.1 | -2,4   | 0,020293 | 0,477245 | Cassette Exon       | 0,18 |
| TC1100003999.mm.1 | 2,88 Abca8a  | PSR1100037496.mm.1 | -2,46  | 0,017592 | 0,464302 | Intron Retention    | 0,37 |
| TC1100003999.mm.1 | 2,88 Abca8a  | PSR1100037474.mm.1 | -2,72  | 0,000787 | 0,309905 | Alternative 3' Acce | 0,22 |
| TC1100003999.mm.1 | 2,88 Abca8a  | PSR1100037520.mm.1 | -2,73  | 0,000562 | 0,304044 |                     |      |
| TC1100003999.mm.1 | 2,88 Abca8a  | JUC1100019588.mm.1 | -2,84  | 0,017317 | 0,463282 |                     |      |
| TC1100003999.mm.1 | 2,88 Abca8a  | PSR1100037519.mm.1 | -2,91  | 0,004166 | 0,3623   |                     |      |
| TC1100003999.mm.1 | 2,88 Abca8a  | PSR1100037476.mm.1 | -3,45  | 0,006354 | 0,389469 | Alternative 5' Donc | 0,37 |
| TC1100003999.mm.1 | 2,88 Abca8a  | JUC1100019620.mm.1 | -3,72  | 0,012133 | 0,432868 |                     |      |
| TC1100003999.mm.1 | 2,88 Abca8a  | PSR1100037479.mm.1 | -4,18  | 0,000719 | 0,306015 | Alternative 3' Acce | 0,49 |
| TC1100003999.mm.1 | 2,88 Abca8a  | JUC1100019589.mm.1 | -4,83  | 0,017515 | 0,464019 |                     |      |
| TC1100003999.mm.1 | 2,88 Abca8a  | PSR1100037491.mm.1 | -5,52  | 0,001658 | 0,334725 | Alternative 5' Donc | 0,48 |
| TC1100003999.mm.1 | 2,88 Abca8a  | JUC1100019624.mm.1 | -6,61  | 0,017754 | 0,465425 |                     |      |
| TC1400000604.mm.1 | 4,58 Rpgrip1 | JUC1400002760.mm.1 | 2,23   | 0,005182 | 0,376851 |                     |      |
| TC1400000604.mm.1 | 4,58 Rpgrip1 | JUC1400002777.mm.1 | 2,18   | 0,005014 | 0,37387  |                     |      |
| TC1400000604.mm.1 | 4,58 Rpgrip1 | PSR1400004833.mm.1 | -2,09  | 0,011423 | 0,427656 | Alternative 3' Acce | 0,17 |
| TC1400000604.mm.1 | 4,58 Rpgrip1 | PSR1400004865.mm.1 | -2,16  | 0,031197 | 0,515739 | Alternative 5' Donc | 0,13 |
| TC1400000604.mm.1 | 4,58 Rpgrip1 | PSR1400004852.mm.1 | -2,36  | 0,004772 | 0,371044 | Alternative 3' Acce | 0,17 |
| TC1400000604.mm.1 | 4,58 Rpgrip1 | PSR1400004818.mm.1 | -2,56  | 0,014742 | 0,450615 | Cassette Exon       | 0,23 |
| TC1400000604.mm.1 | 4,58 Rpgrip1 | JUC1400002762.mm.1 | -2,71  | 0,002742 | 0,349612 |                     |      |
| TC1400000604.mm.1 | 4,58 Rpgrip1 | PSR1400004820.mm.1 | -2,85  | 0,026655 | 0,501823 | Cassette Exon       | 0,4  |
| TC1400000604.mm.1 | 4,58 Rpgrip1 | PSR1400004860.mm.1 | -2,88  | 0,003775 | 0,357586 | Alternative 5' Donc | 0,42 |
| TC1400000604.mm.1 | 4,58 Rpgrip1 | JUC1400002797.mm.1 | -3,18  | 0,014367 | 0,448293 |                     |      |
| TC1400000604.mm.1 | 4,58 Rpgrip1 | PSR1400004819.mm.1 | -3,26  | 0,006477 | 0,390467 | Cassette Exon       | 0,42 |
| TC1400000604.mm.1 | 4,58 Rpgrip1 | JUC1400002771.mm.1 | -3,28  | 0,001565 | 0,331411 |                     |      |
| TC1400000604.mm.1 | 4,58 Rpgrip1 | PSR1400004831.mm.1 | -3,38  | 0,001791 | 0,336311 | Alternative 5' Donc | 0,38 |
| TC1400000604.mm.1 | 4,58 Rpgrip1 | JUC1400002800.mm.1 | -3,71  | 0,01432  | 0,448086 |                     |      |
| TC1400000604.mm.1 | 4,58 Rpgrip1 | JUC1400002799.mm.1 | -3,83  | 0,004981 | 0,373851 |                     |      |
| TC1400000604.mm.1 | 4,58 Rpgrip1 | JUC1400002773.mm.1 | -4,09  | 0,013502 | 0,443238 |                     |      |
| TC1400000604.mm.1 | 4,58 Rpgrip1 | PSR1400004855.mm.1 | -5,71  | 0,030435 | 0,513139 | Alternative 5' Donc | 0,48 |
| TC1400000604.mm.1 | 4,58 Rpgrip1 | PSR1400004822.mm.1 | -5,76  | 0,02046  | 0,478018 | Alternative 5' Donc | 0,46 |
| TC1400000604.mm.1 | 4,58 Rpgrip1 | PSR1400004809.mm.1 | -7,11  | 0,003068 | 0,353892 | Alternative 3' Acce | 0,34 |
| TC1400000604.mm.1 | 4,58 Rpgrip1 | PSR1400004857.mm.1 | -7,55  | 0,002927 | 0,352289 | Alternative 5' Donc | 0,48 |
| TC1400000604.mm.1 | 4,58 Rpgrip1 | JUC1400002792.mm.1 | -8,71  | 0,023521 | 0,490947 |                     |      |
| TC1400000604.mm.1 | 4,58 Rpgrip1 | JUC1400002789.mm.1 | -10,13 | 0,000746 | 0,30798  |                     |      |
| TC1400000604.mm.1 | 4,58 Rpgrip1 | JUC1400002790.mm.1 | -10,63 | 0,007981 | 0,403853 |                     |      |
| TC1400000604.mm.1 | 4,58 Rpgrip1 | PSR1400004856.mm.1 | -11,58 | 0,004098 | 0,36228  | Alternative 5' Donc | 0,48 |
| TC1400000604.mm.1 | 4,58 Rpgrip1 | JUC1400002787.mm.1 | -13,1  | 0,004759 | 0,371039 |                     |      |
| TC1400000604.mm.1 | 4,58 Rpgrip1 | JUC1400002798.mm.1 | -16,78 | 0,000448 | 0,297771 |                     |      |
| TC1400002297.mm.1 | 4,43 Nefm    | JUC1400009761.mm.1 | 2,23   | 0,037886 | 0,534993 |                     |      |
| TC1400002297.mm.1 | 4,43 Nefm    | JUC1400009760.mm.1 | -2,58  | 0,002606 | 0,349501 |                     |      |
| TC1400002297.mm.1 | 4,43 Nefm    | PSR1400017779.mm.1 | -2,78  | 0,045698 | 0,554833 | Alternative 5' Donc | 0,3  |
| TC1400002297.mm.1 | 4,43 Nefm    | PSR1400017772.mm.1 | -3,09  | 0,003099 | 0,353892 | Cassette Exon       | 0,33 |
| TC1400002297.mm.1 | 4,43 Nefm    | PSR1400017773.mm.1 | -4,72  | 0,007931 | 0,403819 | Cassette Exon       | 0,41 |
| TC1400002297.mm.1 | 4,43 Nefm    | PSR1400017774.mm.1 | -4,8   | 0,007669 | 0,402377 | Alternative 3' Acce | 0,48 |



|                   |                           |                    |       |          |                              |      |
|-------------------|---------------------------|--------------------|-------|----------|------------------------------|------|
| TC1400002297.mm.1 | 4,43 Nefm                 | PSR1400017780.mm.1 | -5,13 | 0,003109 | 0,353892 Alternative 5' Donc | 0,3  |
| TC1400002297.mm.1 | 4,43 Nefm                 | JUC1400009758.mm.1 | -8,51 | 0,003269 | 0,354243                     |      |
| TC0100000216.mm.1 | 1,5 Dst; bpag1-e          | JUC0100000734.mm.1 | 2,23  | 0,0189   | 0,47127                      |      |
| TC0100000216.mm.1 | 1,5 Dst; bpag1-e          | JUC0100000649.mm.1 | 2,17  | 0,022618 | 0,487464                     |      |
| TC0100000216.mm.1 | 1,5 Dst; bpag1-e          | JUC0100000675.mm.1 | -2,04 | 0,04332  | 0,549306                     |      |
| TC0100000216.mm.1 | 1,5 Dst; bpag1-e          | PSR0100001299.mm.1 | -2,05 | 0,033935 | 0,524252 Intron Retention    | 0,16 |
| TC0100000216.mm.1 | 1,5 Dst; bpag1-e          | PSR0100001307.mm.1 | -2,1  | 0,017598 | 0,464312 Alternative 5' Donc | 0,16 |
| TC0100000216.mm.1 | 1,5 Dst; bpag1-e          | JUC0100000686.mm.1 | -2,17 | 0,028351 | 0,506843                     |      |
| TC0100000216.mm.1 | 1,5 Dst; bpag1-e          | PSR0100001330.mm.1 | -2,31 | 0,017032 | 0,461729 Cassette Exon       | 0,26 |
| TC0100000216.mm.1 | 1,5 Dst; bpag1-e          | JUC0100000690.mm.1 | -2,37 | 0,024523 | 0,493992                     |      |
| TC0100000216.mm.1 | 1,5 Dst; bpag1-e          | PSR0100001331.mm.1 | -2,72 | 0,00632  | 0,38927 Cassette Exon        | 0,26 |
| TC0100000216.mm.1 | 1,5 Dst; bpag1-e          | JUC0100000747.mm.1 | -2,78 | 0,020294 | 0,477245                     |      |
| TC0100000216.mm.1 | 1,5 Dst; bpag1-e          | PSR0100001305.mm.1 | -2,96 | 0,005486 | 0,379939 Intron Retention    | 0,38 |
| TC0100000216.mm.1 | 1,5 Dst; bpag1-e          | JUC0100000688.mm.1 | -3,97 | 0,03216  | 0,518685                     |      |
| TC0600000398.mm.1 | 1,28 Tmem178b             | PSR0600003102.mm.1 | 2,23  | 0,004665 | 0,370181 Cassette Exon       | 0,1  |
| TC0600000398.mm.1 | 1,28 Tmem178b             | PSR0600003114.mm.1 | -2,69 | 0,044792 | 0,552442 Alternative 5' Donc | 0,25 |
| TC0800000831.mm.1 | 1,24 Nwd1                 | JUC0800003230.mm.1 | 2,23  | 0,026645 | 0,50179                      |      |
| TC0800000831.mm.1 | 1,24 Nwd1                 | PSR0800006159.mm.1 | -2,48 | 0,035324 | 0,528381 Alternative 5' Donc | 0,24 |
| TC0500003733.mm.1 | 1,58 Zfp644; LOC100504779 | JUC0500013992.mm.1 | 2,23  | 0,017342 | 0,46353                      |      |
| TC0500003733.mm.1 | 1,58 Zfp644; LOC100504779 | JUC0500014006.mm.1 | -2,05 | 0,048781 | 0,56148                      |      |
| TC0500003733.mm.1 | 1,58 Zfp644; LOC100504779 | JUC0500014002.mm.1 | -2,25 | 0,02928  | 0,509874                     |      |
| TC0500003733.mm.1 | 1,58 Zfp644; LOC100504779 | PSR0500025701.mm.1 | -2,41 | 0,018105 | 0,467161 Alternative 3' Acce | 0,21 |
| TC0500000044.mm.1 | -1,22 Sri                 | PSR0500000378.mm.1 | 2,23  | 0,029682 | 0,510918 Alternative 5' Donc | 0,2  |
| TC1900000233.mm.1 | 1,29                      | PSR1900002827.mm.1 | 2,23  | 0,03935  | 0,539364 Alternative 5' Donc | 0,2  |
| TC0700003941.mm.1 | -1,59 Trim30b             | PSR0700032951.mm.1 | 2,23  | 0,040957 | 0,543459 Alternative 3' Acce | 0,19 |
| TC0200005066.mm.1 | 1,02 Chd6                 | JUC0200022323.mm.1 | 2,23  | 0,043299 | 0,549297                     |      |
| TC0200005066.mm.1 | 1,02 Chd6                 | PSR0200043295.mm.1 | -2,03 | 0,020822 | 0,47952 Alternative 3' Acce  | 0,16 |
| TC0700004612.mm.1 | 1,02 Tpcn2                | JUC0700020625.mm.1 | 2,23  | 0,018774 | 0,470789                     |      |
| TC0700004612.mm.1 | 1,02 Tpcn2                | JUC0700020633.mm.1 | 2,11  | 0,040989 | 0,543565                     |      |
| TC0700004612.mm.1 | 1,02 Tpcn2                | PSR0700039126.mm.1 | -2,3  | 0,013989 | 0,446308 Cassette Exon       | 0,16 |
| TC0X00002630.mm.1 | -2,02                     | PSR0X00016405.mm.1 | 2,23  | 0,037522 | 0,533968 Alternative 3' Acce | 0,15 |
| TC0900002105.mm.1 | -1,11 Crtam               | PSR0900017387.mm.1 | 2,23  | 0,006431 | 0,389972 Cassette Exon       | 0,14 |
| TC1100002912.mm.1 | 1,08 Rnf112               | PSR1100026430.mm.1 | 2,23  | 0,000629 | 0,304044 Cassette Exon       | 0,14 |
| TC1100002912.mm.1 | 1,08 Rnf112               | PSR1100026432.mm.1 | 2,06  | 0,006999 | 0,395737 Cassette Exon       | 0,12 |
| TC1600001380.mm.1 | 1,4 Dgkg                  | PSR1600011496.mm.1 | 2,23  | 0,014167 | 0,447466 Cassette Exon       | 0,13 |
| TC1600001380.mm.1 | 1,4 Dgkg                  | JUC1600005964.mm.1 | 2,15  | 0,009469 | 0,416539                     |      |
| TC0900002912.mm.1 | -1,86 E330023G01Rik       | PSR0900023970.mm.1 | 2,23  | 0,000087 | 0,255472 Cassette Exon       | 0,12 |
| TC1700001827.mm.1 | -1,43 Sik1                | PSR1700016814.mm.1 | 2,23  | 0,049876 | 0,563773 Cassette Exon       | 0,12 |
| TC0X00000512.mm.1 | -1,23 3830403N18Rik       | PSR0X00003341.mm.1 | 2,23  | 0,000337 | 0,289576 Cassette Exon       | 0,11 |
| TC0X00000512.mm.1 | -1,23 3830403N18Rik       | JUC0X00001710.mm.1 | -2,27 | 0,037521 | 0,533968                     |      |
| TC1100000361.mm.1 | -1,06 Kcnmb1              | PSR1100002995.mm.1 | 2,23  | 0,011154 | 0,426295 Cassette Exon       | 0,11 |
| TC0300002822.mm.1 | -1,93 Snx7                | PSR0300022340.mm.1 | 2,23  | 0,007936 | 0,403819 Cassette Exon       | 0,1  |
| TC1100001644.mm.1 | 1,49 Cntnap1              | JUC1100007943.mm.1 | 2,23  | 0,006833 | 0,393893                     |      |
| TC1100001644.mm.1 | 1,49 Cntnap1              | JUC1100007952.mm.1 | 2,2   | 0,001086 | 0,317191                     |      |
| TC1100001644.mm.1 | 1,49 Cntnap1              | PSR1100015315.mm.1 | -2,03 | 0,014014 | 0,446443 Cassette Exon       | 0,1  |
| TC0600002248.mm.1 | -1 Dfna5                  | PSR0600017627.mm.1 | 2,23  | 0,038438 | 0,536405 Cassette Exon       | 0,07 |
| TC0900002017.mm.1 | 1,72 Ddx25                | PSR0900016777.mm.1 | 2,23  | 0,012214 | 0,433321 Cassette Exon       | 0,07 |
| TC0500003610.mm.1 | 1,29 Gpr12                | PSR0500033148.mm.1 | 2,23  | 0,015513 | 0,454456 Cassette Exon       | 0,06 |

|                   |                     |                    |        |          |                              |      |
|-------------------|---------------------|--------------------|--------|----------|------------------------------|------|
| TC0800000779.mm.1 | 1,22 Gm3643         | PSR0800005527.mm.1 | 2,23   | 0,001081 | 0,317191 Cassette Exon       | 0,04 |
| TC0800000779.mm.1 | 1,22 Gm3643         | JUC0800002932.mm.1 | -2,65  | 0,011717 | 0,429969                     |      |
| TC1400001898.mm.1 | 1,12 Ero1l          | JUC1400007882.mm.1 | 2,23   | 0,023361 | 0,490143                     |      |
| TC1300000924.mm.1 | -1 Ttc37            | JUC1300003167.mm.1 | 2,23   | 0,001531 | 0,330287                     |      |
| TC1800001746.mm.1 | 1,39 Hdhd2          | JUC1800003293.mm.1 | 2,23   | 0,019434 | 0,473998                     |      |
| TC1800000448.mm.1 | -1,55 Spink5        | JUC1800001818.mm.1 | 2,23   | 0,002694 | 0,349612                     |      |
| TC1800000448.mm.1 | -1,55 Spink5        | JUC1800001841.mm.1 | 2,12   | 0,02762  | 0,504604                     |      |
| TC1700002183.mm.1 | 1,39 Klc4           | JUC1700010957.mm.1 | 2,23   | 0,004046 | 0,361816                     |      |
| TC1500002071.mm.1 | 1,05 Kif21a         | JUC1500009516.mm.1 | 2,23   | 0,032027 | 0,51843                      |      |
| TC1600000190.mm.1 | 1,08 Prkdc          | JUC1600000767.mm.1 | 2,23   | 0,020037 | 0,476453                     |      |
| TC1600000190.mm.1 | 1,08 Prkdc          | JUC1600000753.mm.1 | -2,08  | 0,001756 | 0,335996                     |      |
| TC1600000190.mm.1 | 1,08 Prkdc          | JUC1600000752.mm.1 | -3,21  | 0,006612 | 0,392269                     |      |
| TC0200000365.mm.1 | -1,08 4931423N10Rik | JUC0200000835.mm.1 | 2,23   | 0,006423 | 0,389915                     |      |
| TC0500000920.mm.1 | 1,1 Gm5559          | JUC0500004330.mm.1 | 2,23   | 0,040078 | 0,541392                     |      |
| TC0700004219.mm.1 | 1,16 Cog7           | JUC0700018509.mm.1 | 2,23   | 0,020312 | 0,477245                     |      |
| TC0600000866.mm.1 | -1,4 Suctg1         | JUC0600003338.mm.1 | 2,23   | 0,002692 | 0,349612                     |      |
| TC0600001970.mm.1 | 1,09 Rbm28          | JUC0600008086.mm.1 | 2,23   | 0,018308 | 0,468049                     |      |
| TC0700003005.mm.1 | -1,01 Ruvbl2        | JUC0700014544.mm.1 | 2,23   | 0,000748 | 0,308185                     |      |
| TC0400000425.mm.1 | 1,41 N28178         | JUC0400001292.mm.1 | 2,23   | 0,021238 | 0,481319                     |      |
| TC0400000425.mm.1 | 1,41 N28178         | JUC0400001298.mm.1 | -2,03  | 0,00949  | 0,416578                     |      |
| TC0400001177.mm.1 | -1,12 Dmrta2        | JUC0400004421.mm.1 | 2,23   | 0,006385 | 0,389571                     |      |
| TC0300001447.mm.1 | -1,11 Gbp2          | JUC0300006136.mm.1 | 2,23   | 0,03611  | 0,529748                     |      |
| TC0400002043.mm.1 | -1,09 Megf6         | JUC0400008863.mm.1 | 2,23   | 0,006583 | 0,39213                      |      |
| TC0700004650.mm.1 | 17,19 Ipw; Snord116 | PSR0700028491.mm.1 | 2,22   | 0,028422 | 0,507179 Cassette Exon       | 0,11 |
| TC0700004650.mm.1 | 17,19 Ipw; Snord116 | PSR0700028515.mm.1 | -2,19  | 0,024483 | 0,493992 Cassette Exon       | 0,09 |
| TC0700004650.mm.1 | 17,19 Ipw; Snord116 | PSR0700028499.mm.1 | -3,02  | 0,039207 | 0,538692 Cassette Exon       | 0,12 |
| TC0700004650.mm.1 | 17,19 Ipw; Snord116 | JUC0700015106.mm.1 | -3,87  | 0,002917 | 0,352289                     |      |
| TC0700004650.mm.1 | 17,19 Ipw; Snord116 | PSR0700028518.mm.1 | -4,44  | 0,004878 | 0,372195 Cassette Exon       | 0,55 |
| TC0700004650.mm.1 | 17,19 Ipw; Snord116 | JUC0700015097.mm.1 | -5,17  | 0,00403  | 0,361636                     |      |
| TC0700004650.mm.1 | 17,19 Ipw; Snord116 | PSR0700028522.mm.1 | -5,23  | 0,003695 | 0,357266 Cassette Exon       | 0,41 |
| TC0700004650.mm.1 | 17,19 Ipw; Snord116 | JUC0700015102.mm.1 | -5,44  | 0,003342 | 0,354243                     |      |
| TC0700004650.mm.1 | 17,19 Ipw; Snord116 | JUC0700015103.mm.1 | -5,44  | 0,003342 | 0,354243                     |      |
| TC0700004650.mm.1 | 17,19 Ipw; Snord116 | JUC0700015108.mm.1 | -5,44  | 0,003342 | 0,354243                     |      |
| TC0700004650.mm.1 | 17,19 Ipw; Snord116 | PSR0700028520.mm.1 | -5,93  | 0,008429 | 0,406611 Cassette Exon       | 0,41 |
| TC0700004650.mm.1 | 17,19 Ipw; Snord116 | PSR0700028475.mm.1 | -6,52  | 0,001518 | 0,330268 Cassette Exon       | 0,3  |
| TC0700004650.mm.1 | 17,19 Ipw; Snord116 | PSR0700028479.mm.1 | -6,57  | 0,001591 | 0,331726 Cassette Exon       | 0,43 |
| TC0700004650.mm.1 | 17,19 Ipw; Snord116 | PSR0700028487.mm.1 | -7,38  | 0,000785 | 0,309887 Alternative 3' Acce | 0,5  |
| TC0700004650.mm.1 | 17,19 Ipw; Snord116 | JUC0700015151.mm.1 | -8,51  | 0,004708 | 0,370888                     |      |
| TC0700004650.mm.1 | 17,19 Ipw; Snord116 | PSR0700028517.mm.1 | -9,18  | 0,008061 | 0,40448 Cassette Exon        | 0,41 |
| TC0700004650.mm.1 | 17,19 Ipw; Snord116 | PSR0700028478.mm.1 | -9,72  | 0,000074 | 0,251428 Cassette Exon       | 0,3  |
| TC0700004650.mm.1 | 17,19 Ipw; Snord116 | JUC0700015146.mm.1 | -10,54 | 0,003439 | 0,3554                       |      |
| TC0700004650.mm.1 | 17,19 Ipw; Snord116 | PSR0700028509.mm.1 | -11,08 | 0,00296  | 0,352501 Cassette Exon       | 0,29 |
| TC0700004650.mm.1 | 17,19 Ipw; Snord116 | PSR0700028512.mm.1 | -11,82 | 0,000596 | 0,304044 Alternative 5' Donc | 0,49 |
| TC0700004650.mm.1 | 17,19 Ipw; Snord116 | PSR0700028477.mm.1 | -12,1  | 0,007126 | 0,397139 Cassette Exon       | 0,3  |
| TC0700004650.mm.1 | 17,19 Ipw; Snord116 | PSR0700028507.mm.1 | -13,17 | 0,00378  | 0,357586 Alternative 5' Donc | 0,48 |
| TC0700004650.mm.1 | 17,19 Ipw; Snord116 | PSR0700028471.mm.1 | -13,95 | 0,002728 | 0,349612 Cassette Exon       | 0,28 |
| TC0700004650.mm.1 | 17,19 Ipw; Snord116 | PSR0700028472.mm.1 | -14,7  | 0,001226 | 0,322251 Cassette Exon       | 0,28 |
| TC0700004650.mm.1 | 17,19 Ipw; Snord116 | PSR0700028508.mm.1 | -15,49 | 0,000606 | 0,304044 Cassette Exon       | 0,42 |

|                   |       |                  |                    |        |          |          |                     |      |
|-------------------|-------|------------------|--------------------|--------|----------|----------|---------------------|------|
| TC0700004650.mm.1 | 17,19 | lpw; Snord116    | PSR0700028474.mm.1 | -17,63 | 0,000046 | 0,24627  | Cassette Exon       | 0,3  |
| TC0700004650.mm.1 | 17,19 | lpw; Snord116    | PSR0700028494.mm.1 | -18,88 | 0,001904 | 0,338712 | Cassette Exon       | 0,28 |
| TC0700004650.mm.1 | 17,19 | lpw; Snord116    | PSR0700028488.mm.1 | -19,09 | 0,002248 | 0,34578  | Alternative 3' Acce | 0,5  |
| TC0700004650.mm.1 | 17,19 | lpw; Snord116    | JUC0700015142.mm.1 | -19,47 | 0,004533 | 0,368648 |                     |      |
| TC0700004650.mm.1 | 17,19 | lpw; Snord116    | JUC0700015114.mm.1 | -19,51 | 0,000623 | 0,304044 |                     |      |
| TC0700004650.mm.1 | 17,19 | lpw; Snord116    | PSR0700028469.mm.1 | -20,65 | 0,000117 | 0,269605 | Cassette Exon       | 0,28 |
| TC0700004650.mm.1 | 17,19 | lpw; Snord116    | JUC0700015126.mm.1 | -24,94 | 0,000409 | 0,297771 |                     |      |
| TC0700004650.mm.1 | 17,19 | lpw; Snord116    | JUC0700015144.mm.1 | -28,29 | 0,001019 | 0,316361 |                     |      |
| TC0700004650.mm.1 | 17,19 | lpw; Snord116    | JUC0700015135.mm.1 | -32,58 | 0,003963 | 0,359922 |                     |      |
| TC0700004650.mm.1 | 17,19 | lpw; Snord116    | PSR0700028521.mm.1 | -39,44 | 0,001922 | 0,34017  | Cassette Exon       | 0,41 |
| TC0700004650.mm.1 | 17,19 | lpw; Snord116    | JUC0700015141.mm.1 | -40,11 | 0,000715 | 0,306015 |                     |      |
| TC0200002829.mm.1 | 3,21  | Uckl1os; Gm16119 | PSR0200023372.mm.1 | 2,22   | 0,033703 | 0,523549 | Alternative 5' Donc | 0,13 |
| TC0200002829.mm.1 | 3,21  | Uckl1os; Gm16119 | PSR0200023364.mm.1 | -2,6   | 0,01946  | 0,474165 | Alternative 3' Acce | 0,09 |
| TC0200002829.mm.1 | 3,21  | Uckl1os; Gm16119 | PSR0200023359.mm.1 | -2,79  | 0,03179  | 0,517596 | Alternative 3' Acce | 0,17 |
| TC0200002829.mm.1 | 3,21  | Uckl1os; Gm16119 | PSR0200023379.mm.1 | -3,25  | 0,043169 | 0,548781 | Alternative 5' Donc | 0,32 |
| TC0600001243.mm.1 | 1,24  | Mtmr14           | PSR0600009523.mm.1 | 2,22   | 0,023482 | 0,490673 | Alternative 3' Acce | 0,15 |
| TC0600001243.mm.1 | 1,24  | Mtmr14           | PSR0600009519.mm.1 | -2,19  | 0,01147  | 0,428022 | Cassette Exon       | 0,11 |
| TC0600001243.mm.1 | 1,24  | Mtmr14           | PSR0600009543.mm.1 | -2,24  | 0,02737  | 0,503961 | Alternative 5' Donc | 0,19 |
| TC0600001243.mm.1 | 1,24  | Mtmr14           | JUC0600004914.mm.1 | -2,42  | 0,008083 | 0,404868 |                     |      |
| TC1100002850.mm.1 | 1,35  | Prss38           | PSR1100025837.mm.1 | 2,22   | 0,033814 | 0,523913 | Alternative 3' Acce | 0,18 |
| TC1900000848.mm.1 | -1,32 |                  | PSR1900007352.mm.1 | 2,22   | 0,011853 | 0,430752 | Alternative 3' Acce | 0,17 |
| TC1200001972.mm.1 | -1,06 | Plek2            | JUC1200007497.mm.1 | 2,22   | 0,043069 | 0,548423 |                     |      |
| TC1200001972.mm.1 | -1,06 | Plek2            | PSR1200013515.mm.1 | -2,09  | 0,024721 | 0,494838 | Cassette Exon       | 0,16 |
| TC1200001972.mm.1 | -1,06 | Plek2            | JUC1200007490.mm.1 | -2,19  | 0,013512 | 0,443333 |                     |      |
| TC1300000187.mm.1 | -1,4  | Pom121l2         | PSR1300001242.mm.1 | 2,22   | 0,00298  | 0,352501 | Cassette Exon       | 0,14 |
| TC0500000125.mm.1 | -1,08 | Hgf              | PSR0500001008.mm.1 | 2,22   | 0,018574 | 0,469618 | Alternative 5' Donc | 0,13 |
| TC0500000125.mm.1 | -1,08 | Hgf              | PSR0500001006.mm.1 | -2,24  | 0,016446 | 0,459051 | Cassette Exon       | 0,1  |
| TC0900001576.mm.1 | -1,09 | Acaa1a           | PSR0900013144.mm.1 | 2,22   | 0,017385 | 0,463704 | Intron Retention    | 0,13 |
| TC0800003202.mm.1 | 1,16  | Rbm34            | PSR0800024633.mm.1 | 2,22   | 0,009905 | 0,418332 | Cassette Exon       | 0,1  |
| TC0400003071.mm.1 | -1,11 | Caap1            | PSR0400024561.mm.1 | 2,22   | 0,015069 | 0,45236  | Cassette Exon       | 0,09 |
| TC0600001839.mm.1 | 1,97  | Asns             | JUC0600007575.mm.1 | 2,22   | 0,008933 | 0,41101  |                     |      |
| TC0600001839.mm.1 | 1,97  | Asns             | PSR0600014487.mm.1 | 2,07   | 0,007674 | 0,402377 | Cassette Exon       | 0,09 |
| TC0600001839.mm.1 | 1,97  | Asns             | JUC0600007567.mm.1 | -2,18  | 0,036719 | 0,531762 |                     |      |
| TC1100003005.mm.1 | -1,16 | Glp2r            | PSR1100027245.mm.1 | 2,22   | 0,014796 | 0,450927 | Cassette Exon       | 0,08 |
| TC0600002870.mm.1 | -1,09 | Cntn3            | JUC0600011456.mm.1 | 2,22   | 0,018405 | 0,468484 |                     |      |
| TC0600002870.mm.1 | -1,09 | Cntn3            | PSR0600022044.mm.1 | 2,08   | 0,048036 | 0,559634 | Cassette Exon       | 0,06 |
| TC0300000889.mm.1 | -1,9  | Tmod4            | JUC0300003600.mm.1 | 2,22   | 0,024225 | 0,493294 |                     |      |
| TC1300001927.mm.1 | 1,01  | Tpmt             | JUC1300006163.mm.1 | 2,22   | 0,020442 | 0,478018 |                     |      |
| TC1300001927.mm.1 | 1,01  | Tpmt             | JUC1300006165.mm.1 | 2,17   | 0,003879 | 0,359196 |                     |      |
| TC0100003270.mm.1 | -1,06 |                  | JUC0100015122.mm.1 | 2,22   | 0,003501 | 0,355638 |                     |      |
| TC1900000549.mm.1 | -1,32 | Slc35g1          | JUC1900002618.mm.1 | 2,22   | 0,038331 | 0,53622  |                     |      |
| TC0200001056.mm.1 | -1,95 | Cdca7            | JUC0200004445.mm.1 | 2,22   | 0,031728 | 0,517489 |                     |      |
| TC0200001056.mm.1 | -1,95 | Cdca7            | JUC0200004446.mm.1 | 2,15   | 0,032776 | 0,520748 |                     |      |
| TC0200001002.mm.1 | -1,12 | Nostrin          | JUC0200004014.mm.1 | 2,22   | 0,038558 | 0,536762 |                     |      |
| TC1100000957.mm.1 | -1,81 | Mink1            | JUC1100004425.mm.1 | 2,22   | 0,041288 | 0,544179 |                     |      |
| TC1000002068.mm.1 | -1,43 | Gm15200          | JUC1000008036.mm.1 | 2,22   | 0,015477 | 0,45435  |                     |      |
| TC1100003147.mm.1 | -1,18 | Spns3            | JUC1100015309.mm.1 | 2,22   | 0,006476 | 0,390467 |                     |      |
| TC0X00000659.mm.1 | -1,19 | Gm1141           | JUC0X00002091.mm.1 | 2,22   | 0,004938 | 0,373093 |                     |      |

|                   |                           |                    |       |          |                              |      |
|-------------------|---------------------------|--------------------|-------|----------|------------------------------|------|
| TC0400002962.mm.1 | -1,28 Bnc2                | JUC0400012555.mm.1 | 2,22  | 0,017627 | 0,464508                     |      |
| TC0400002962.mm.1 | -1,28 Bnc2                | JUC0400012566.mm.1 | -2,66 | 0,042116 | 0,546549                     |      |
| TC0X00001781.mm.1 | -1,23 Magix               | JUC0X00005689.mm.1 | 2,22  | 0,032452 | 0,519591                     |      |
| TC0X00001781.mm.1 | -1,23 Magix               | JUC0X00005694.mm.1 | 2,02  | 0,001991 | 0,341091                     |      |
| TC1000000574.mm.1 | 1,28 Aifm2                | JUC1000002152.mm.1 | 2,22  | 0,008415 | 0,406611                     |      |
| TC1800000658.mm.1 | 4,14 St8sia3              | PSR1800004850.mm.1 | 2,21  | 0,001428 | 0,327447 Alternative 5' Donc | 0,14 |
| TC1800000658.mm.1 | 4,14 St8sia3              | PSR1800004842.mm.1 | -3,36 | 0,022367 | 0,486408 Cassette Exon       | 0,38 |
| TC1800000658.mm.1 | 4,14 St8sia3              | PSR1800004840.mm.1 | -4,27 | 0,01629  | 0,458454 Cassette Exon       | 0,28 |
| TC1800000658.mm.1 | 4,14 St8sia3              | PSR1800004843.mm.1 | -4,63 | 0,003281 | 0,354243 Cassette Exon       | 0,38 |
| TC1800000658.mm.1 | 4,14 St8sia3              | PSR1800004846.mm.1 | -5,09 | 0,003122 | 0,353892 Alternative 3' Acce | 0,48 |
| TC1800000658.mm.1 | 4,14 St8sia3              | JUC1800002709.mm.1 | -5,68 | 0,020968 | 0,479989                     |      |
| TC1800000658.mm.1 | 4,14 St8sia3              | JUC1800002705.mm.1 | -7,64 | 0,024449 | 0,493957                     |      |
| TC1300000998.mm.1 | 4,05 Edil3                | PSR1300006420.mm.1 | 2,21  | 0,030071 | 0,5119 Cassette Exon         | 0,11 |
| TC1300000998.mm.1 | 4,05 Edil3                | PSR1300006412.mm.1 | -2,95 | 0,002239 | 0,34578                      |      |
| TC1300000998.mm.1 | 4,05 Edil3                | PSR1300006415.mm.1 | -2,98 | 0,048035 | 0,559634 Alternative 5' Donc | 0,3  |
| TC1300000998.mm.1 | 4,05 Edil3                | PSR1300006419.mm.1 | -3,15 | 0,027745 | 0,505023 Alternative 5' Donc | 0,32 |
| TC1300000998.mm.1 | 4,05 Edil3                | PSR1300006417.mm.1 | -3,2  | 0,008371 | 0,406476 Alternative 5' Donc | 0,37 |
| TC1300000998.mm.1 | 4,05 Edil3                | PSR1300006407.mm.1 | -3,38 | 0,014611 | 0,449914 Cassette Exon       | 0,25 |
| TC1300000998.mm.1 | 4,05 Edil3                | PSR1300006428.mm.1 | -3,41 | 0,037636 | 0,534189 Alternative 5' Donc | 0,3  |
| TC1300000998.mm.1 | 4,05 Edil3                | PSR1300006425.mm.1 | -3,46 | 0,031969 | 0,518183 Cassette Exon       | 0,2  |
| TC1300000998.mm.1 | 4,05 Edil3                | PSR1300006411.mm.1 | -3,58 | 0,003665 | 0,357266                     |      |
| TC1300000998.mm.1 | 4,05 Edil3                | JUC1300003372.mm.1 | -4,37 | 0,006284 | 0,388916                     |      |
| TC1300000998.mm.1 | 4,05 Edil3                | PSR1300006408.mm.1 | -4,45 | 0,042884 | 0,548178 Alternative 3' Acce | 0,34 |
| TC1300000998.mm.1 | 4,05 Edil3                | PSR1300006401.mm.1 | -6,89 | 0,006898 | 0,394731 Cassette Exon       | 0,25 |
| TC0200002012.mm.1 | -1,03 Mavs                | PSR0200015990.mm.1 | 2,21  | 0,044305 | 0,551368 Alternative 3' Acce | 0,19 |
| TC0400001359.mm.1 | 1,38 Rims3                | PSR0400010316.mm.1 | 2,21  | 0,046357 | 0,556272 Alternative 5' Donc | 0,19 |
| TC0500003589.mm.1 | -1,01 Pdap1               | PSR0500032925.mm.1 | 2,21  | 0,021187 | 0,481033 Alternative 5' Donc | 0,18 |
| TC1200000200.mm.1 | -1,44 Grhl1               | PSR1200001566.mm.1 | 2,21  | 0,035869 | 0,529376 Alternative 3' Acce | 0,17 |
| TC0200004114.mm.1 | 1,91 1110051M20Rik        | PSR0200034470.mm.1 | 2,21  | 0,000154 | 0,272178 Cassette Exon       | 0,12 |
| TC0200004114.mm.1 | 1,91 1110051M20Rik        | PSR0200034476.mm.1 | -2,38 | 0,035925 | 0,529399 Cassette Exon       | 0,16 |
| TC0200004114.mm.1 | 1,91 1110051M20Rik        | JUC0200017616.mm.1 | -3,21 | 0,010486 | 0,421937                     |      |
| TC1100003450.mm.1 | -1,35 Vmp1; Mir21a; Mir21 | PSR1100031706.mm.1 | 2,21  | 0,046401 | 0,556478 Cassette Exon       | 0,16 |
| TC1100003450.mm.1 | -1,35 Vmp1; Mir21a; Mir21 | JUC1100016576.mm.1 | 2,16  | 0,011408 | 0,427567                     |      |
| TC1100003450.mm.1 | -1,35 Vmp1; Mir21a; Mir21 | PSR1100031699.mm.1 | 2,02  | 0,002012 | 0,341091 Cassette Exon       | 0,14 |
| TC1100003450.mm.1 | -1,35 Vmp1; Mir21a; Mir21 | PSR1100031709.mm.1 | 2,02  | 0,004099 | 0,36228 Cassette Exon        | 0,11 |
| TC0500002859.mm.1 | 1,18 Wdfy3                | JUC0500013720.mm.1 | 2,21  | 0,012511 | 0,435429                     |      |
| TC0500002859.mm.1 | 1,18 Wdfy3                | PSR0500025242.mm.1 | -2,15 | 0,013448 | 0,442693 Cassette Exon       | 0,15 |
| TC0X00000359.mm.1 | -1,74 Rhox10              | PSR0X00002466.mm.1 | 2,21  | 0,001313 | 0,324276 Cassette Exon       | 0,15 |
| TC0400004186.mm.1 | -1,45 Nfia                | PSR0400006497.mm.1 | 2,21  | 0,00102  | 0,316361 Cassette Exon       | 0,13 |
| TC0400003545.mm.1 | 1,35 Ago4; Eif2c4         | PSR0400028890.mm.1 | 2,21  | 0,04977  | 0,563646 Cassette Exon       | 0,12 |
| TC0400004066.mm.1 | -1,07 Slc45a1             | PSR0400033793.mm.1 | 2,21  | 0,016738 | 0,460345 Cassette Exon       | 0,12 |
| TC0400001441.mm.1 | -2,05                     | PSR0400010937.mm.1 | 2,21  | 0,01031  | 0,420505 Cassette Exon       | 0,11 |
| TC0600002047.mm.1 | -1,66 Gm13858             | PSR0600016110.mm.1 | 2,21  | 0,040804 | 0,5432 Cassette Exon         | 0,11 |
| TC0900000641.mm.1 | -1,48 4930550C14Rik       | PSR0900004568.mm.1 | 2,21  | 0,011672 | 0,429939 Cassette Exon       | 0,11 |
| TC1100002826.mm.1 | -1,5 Olfr328              | PSR1100025554.mm.1 | 2,21  | 0,019986 | 0,476227 Cassette Exon       | 0,11 |
| TC1200000160.mm.1 | 1,11                      | PSR1200001326.mm.1 | 2,21  | 0,009244 | 0,414452 Cassette Exon       | 0,11 |
| TC1400002215.mm.1 | -1,32 Fdft1               | PSR1400017146.mm.1 | 2,21  | 0,00757  | 0,401494 Cassette Exon       | 0,11 |
| TC0800003200.mm.1 | 1,61 Tomm20               | PSR0800024613.mm.1 | 2,21  | 0,004778 | 0,371044 Alternative 3' Acce | 0,08 |

|                   |                        |                    |       |          |          |                          |
|-------------------|------------------------|--------------------|-------|----------|----------|--------------------------|
| TC1400000226.mm.1 | -1,37 E330034G19Rik    | JUC1400001016.mm.1 | 2,21  | 0,033895 | 0,524202 |                          |
| TC1400002790.mm.1 | -1,06 2610042L04Rik    | JUC1400000143.mm.1 | 2,21  | 0,002627 | 0,349612 |                          |
| TC1200000729.mm.1 | -1,97 Gm26669          | JUC1200002943.mm.1 | 2,21  | 0,007704 | 0,402552 |                          |
| TC0300000876.mm.1 | -1,07                  | JUC0300003510.mm.1 | 2,21  | 0,012114 | 0,432704 |                          |
| TC0200004443.mm.1 | 1,64 Ndufaf1           | JUC0200019000.mm.1 | 2,21  | 0,017701 | 0,465159 |                          |
| TC1500000019.mm.1 | -1,69 Rpl37; Gm13826   | JUC1500000106.mm.1 | 2,21  | 0,040073 | 0,541386 |                          |
| TC1600000135.mm.1 | 1,23 2610020C07Rik     | JUC1600000476.mm.1 | 2,21  | 0,00808  | 0,404795 |                          |
| TC1600000918.mm.1 | 1,81 Ncam2             | JUC1600003819.mm.1 | 2,21  | 0,003924 | 0,359818 |                          |
| TC0500000896.mm.1 | 1,16 Ccng2             | PSR0500007739.mm.1 | 2,21  | 0,007098 | 0,396897 |                          |
| TC0500000896.mm.1 | 1,16 Ccng2             | JUC0500004221.mm.1 | 2,18  | 0,039924 | 0,540966 |                          |
| TC0900000363.mm.1 | 1,25 Hepacam           | JUC0900001426.mm.1 | 2,21  | 0,009093 | 0,412827 |                          |
| TC0500003381.mm.1 | -1,12 Wbscr28          | JUC0500016640.mm.1 | 2,21  | 0,038998 | 0,537976 |                          |
| TC0300001960.mm.1 | -1,52 Maml3            | JUC0300007844.mm.1 | 2,21  | 0,035646 | 0,528956 |                          |
| TC0300001960.mm.1 | -1,52 Maml3            | PSR0300014963.mm.1 | 2,11  | 0,026895 | 0,502518 |                          |
| TC1100003481.mm.1 | -1,72                  | JUC1100016694.mm.1 | 2,21  | 0,038789 | 0,537528 |                          |
| TC1100001382.mm.1 | -1,13 4930556N13Rik    | JUC1100006799.mm.1 | 2,21  | 0,012021 | 0,432286 |                          |
| TC1100001945.mm.1 | 1,12 Mgat5b            | JUC1100009655.mm.1 | 2,21  | 0,046356 | 0,556272 |                          |
| TC0900002836.mm.1 | -1,33 Zic1             | JUC0900013132.mm.1 | 2,21  | 0,018585 | 0,469618 |                          |
| TC0900002156.mm.1 | 4,1 C2cd2l             | PSR0900017914.mm.1 | 2,2   | 0,032376 | 0,519221 | Cassette Exon 0,1        |
| TC0900002156.mm.1 | 4,1 C2cd2l             | PSR0900017901.mm.1 | -2,15 | 0,000231 | 0,28803  | Alternative 3' Acce 0,19 |
| TC0900002156.mm.1 | 4,1 C2cd2l             | JUC0900010087.mm.1 | -2,84 | 0,005233 | 0,377425 |                          |
| TC0900002156.mm.1 | 4,1 C2cd2l             | JUC0900010086.mm.1 | -3,29 | 0,009114 | 0,413086 |                          |
| TC0900002156.mm.1 | 4,1 C2cd2l             | PSR0900017899.mm.1 | -3,74 | 0,009302 | 0,414883 | Alternative 3' Acce 0,39 |
| TC0900002156.mm.1 | 4,1 C2cd2l             | PSR0900017916.mm.1 | -4,03 | 0,003467 | 0,355628 | Alternative 5' Donc 0,39 |
| TC1900001072.mm.1 | 3,12 Gng3              | JUC1900005482.mm.1 | 2,2   | 0,017529 | 0,464105 |                          |
| TC1900001072.mm.1 | 3,12 Gng3              | PSR1900010057.mm.1 | -2,79 | 0,031641 | 0,517405 | Alternative 3' Acce 0,27 |
| TC1900001231.mm.1 | 6,55 Rorb              | PSR1900011178.mm.1 | 2,2   | 0,004686 | 0,370338 | Alternative 5' Donc 0,11 |
| TC1900001231.mm.1 | 6,55 Rorb              | PSR1900011196.mm.1 | -2,2  | 0,002339 | 0,347265 | Cassette Exon 0,25       |
| TC1900001231.mm.1 | 6,55 Rorb              | JUC1900006124.mm.1 | -2,73 | 0,021052 | 0,480262 |                          |
| TC1900001231.mm.1 | 6,55 Rorb              | JUC1900006126.mm.1 | -5,52 | 0,001246 | 0,322251 |                          |
| TC0400002367.mm.1 | 1,35 Ankrd6            | PSR0400019236.mm.1 | 2,2   | 0,037751 | 0,534682 | Alternative 3' Acce 0,23 |
| TC0400002367.mm.1 | 1,35 Ankrd6            | JUC0400010029.mm.1 | -2,95 | 0,004601 | 0,369794 |                          |
| TC0900002212.mm.1 | -1,59 Tagln            | PSR0900018453.mm.1 | 2,2   | 0,016588 | 0,459685 | Alternative 5' Donc 0,19 |
| TC1000001917.mm.1 | 1,01 Gm8709            | PSR1000013805.mm.1 | 2,2   | 0,005144 | 0,376442 | Alternative 5' Donc 0,18 |
| TC1200002416.mm.1 | 1,34 Ppp1r13b          | PSR1200016802.mm.1 | 2,2   | 0,00823  | 0,405976 | Cassette Exon 0,14       |
| TC0100001063.mm.1 | -1,59 Tfcp2l1; Gm23497 | PSR0100008789.mm.1 | 2,2   | 0,044918 | 0,552764 | Cassette Exon 0,13       |
| TC0X00002999.mm.1 | -1,09 Armcx6           | PSR0X00018714.mm.1 | 2,2   | 0,003962 | 0,359922 | Cassette Exon 0,13       |
| TC1600000205.mm.1 | -1,01 Ypel1            | PSR1600001658.mm.1 | 2,2   | 0,016547 | 0,459612 | Cassette Exon 0,13       |
| TC1100001108.mm.1 | 1,22 Tmigd1            | PSR1100010045.mm.1 | 2,2   | 0,01932  | 0,473294 | Cassette Exon 0,11       |
| TC1200002432.mm.1 | 1,04 Tmem179           | PSR1200016871.mm.1 | 2,2   | 0,000967 | 0,313456 | Cassette Exon 0,11       |
| TC1400001174.mm.1 | -2,04 Uchl3            | PSR1400009166.mm.1 | 2,2   | 0,000445 | 0,297771 | Cassette Exon 0,11       |
| TC0600000413.mm.1 | -1,94 Tas2r108         | PSR0600003203.mm.1 | 2,2   | 0,026537 | 0,501411 | Cassette Exon 0,11       |
| TC1200001108.mm.1 | 1,56 Cyp46a1           | JUC1200004390.mm.1 | 2,2   | 0,014021 | 0,446501 |                          |
| TC1200001108.mm.1 | 1,56 Cyp46a1           | JUC1200004395.mm.1 | -2,76 | 0,00327  | 0,354243 |                          |
| TC1900000940.mm.1 | 1,51 Bbs1              | JUC1900004554.mm.1 | 2,2   | 0,045834 | 0,555013 |                          |
| TC0100000268.mm.1 | -1,44 Mrpl30; Gm6238   | JUC0100001063.mm.1 | 2,2   | 0,027127 | 0,503022 |                          |
| TC1900001722.mm.1 | -1,2 Gfra1             | JUC1900008497.mm.1 | 2,2   | 0,018274 | 0,468043 |                          |
| TC1500001878.mm.1 | -1,06 Dmc1             | JUC1500008392.mm.1 | 2,2   | 0,037424 | 0,533831 |                          |

|                   |                      |                    |        |          |          |                          |
|-------------------|----------------------|--------------------|--------|----------|----------|--------------------------|
| TC1500001920.mm.1 | -1,47 St13           | JUC1500008556.mm.1 | 2,2    | 0,046284 | 0,556186 |                          |
| TC1500001920.mm.1 | -1,47 St13           | JUC1500008562.mm.1 | 2,1    | 0,046009 | 0,555624 |                          |
| TC1500000793.mm.1 | -1,01 Arhgap8        | JUC1500003518.mm.1 | 2,2    | 0,033032 | 0,521499 |                          |
| TC0200000814.mm.1 | -1,37                | JUC0200003410.mm.1 | 2,2    | 0,016504 | 0,459434 |                          |
| TC1100003693.mm.1 | -1,16 Top2a; Gm23451 | JUC1100017837.mm.1 | 2,2    | 0,027807 | 0,505442 |                          |
| TC0800002710.mm.1 | -1,04                | JUC0800011308.mm.1 | 2,2    | 0,023175 | 0,489953 |                          |
| TC0600002139.mm.1 | -1,32 Prss37         | JUC0600008853.mm.1 | 2,2    | 0,005097 | 0,375732 |                          |
| TC0600002139.mm.1 | -1,32 Prss37         | JUC0600008858.mm.1 | -2,56  | 0,0455   | 0,554359 |                          |
| TC1100001419.mm.1 | 1,04 MbtD1           | JUC1100006905.mm.1 | 2,2    | 0,012693 | 0,43642  |                          |
| TC1100001419.mm.1 | 1,04 MbtD1           | JUC1100006920.mm.1 | -2,79  | 0,028194 | 0,506368 |                          |
| TC0400004112.mm.1 | -1,08 Smim1          | PSR0400034307.mm.1 | 2,2    | 0,019086 | 0,472208 |                          |
| TC0900002982.mm.1 | -1,4 Ackr4           | JUC0900013696.mm.1 | 2,2    | 0,021785 | 0,48438  |                          |
| TC0400003730.mm.1 | 1,06 Catsper4        | JUC0400015945.mm.1 | 2,2    | 0,011074 | 0,42589  |                          |
| TC0400003730.mm.1 | 1,06 Catsper4        | JUC0400015942.mm.1 | -3,2   | 0,034966 | 0,52724  |                          |
| TC1000000446.mm.1 | -1,17 Ascc3          | JUC1000001626.mm.1 | 2,2    | 0,017395 | 0,463736 |                          |
| TC1000000446.mm.1 | -1,17 Ascc3          | JUC1000001610.mm.1 | 2,04   | 0,002316 | 0,346468 |                          |
| TC0400000278.mm.1 | 7,32 Gabrr2          | JUC0400000906.mm.1 | 2,19   | 0,012189 | 0,433076 |                          |
| TC0400000278.mm.1 | 7,32 Gabrr2          | PSR0400001809.mm.1 | -2,6   | 0,02039  | 0,477777 | Cassette Exon 0,21       |
| TC0400000278.mm.1 | 7,32 Gabrr2          | JUC0400000902.mm.1 | -3,11  | 0,000852 | 0,311909 |                          |
| TC0400000278.mm.1 | 7,32 Gabrr2          | PSR0400001814.mm.1 | -5,01  | 0,01019  | 0,419711 | Cassette Exon 0,44       |
| TC0400000278.mm.1 | 7,32 Gabrr2          | JUC0400000909.mm.1 | -6,03  | 0,028471 | 0,507299 |                          |
| TC0400000278.mm.1 | 7,32 Gabrr2          | JUC0400000910.mm.1 | -15,68 | 0,009171 | 0,413447 |                          |
| TC1700001620.mm.1 | 1,96 Tbc1d24; Ntn3   | PSR1700014274.mm.1 | 2,19   | 0,006029 | 0,386586 | Cassette Exon 0,02       |
| TC1700001620.mm.1 | 1,96 Tbc1d24; Ntn3   | PSR1700014280.mm.1 | -2,09  | 0,00253  | 0,349501 | Cassette Exon 0,17       |
| TC1700001620.mm.1 | 1,96 Tbc1d24; Ntn3   | JUC1700007766.mm.1 | -2,09  | 0,046267 | 0,556184 |                          |
| TC1700001620.mm.1 | 1,96 Tbc1d24; Ntn3   | JUC1700007763.mm.1 | -2,12  | 0,040072 | 0,541386 |                          |
| TC1700001620.mm.1 | 1,96 Tbc1d24; Ntn3   | PSR1700014290.mm.1 | -2,24  | 0,025324 | 0,497278 | Alternative 5' Donc 0,08 |
| TC1700001620.mm.1 | 1,96 Tbc1d24; Ntn3   | JUC1700007776.mm.1 | -2,32  | 0,038998 | 0,537976 |                          |
| TC1700001620.mm.1 | 1,96 Tbc1d24; Ntn3   | JUC1700007777.mm.1 | -2,6   | 0,026353 | 0,500865 |                          |
| TC1700001620.mm.1 | 1,96 Tbc1d24; Ntn3   | PSR1700014286.mm.1 | -2,67  | 0,02208  | 0,48541  | Cassette Exon 0,21       |
| TC1700001620.mm.1 | 1,96 Tbc1d24; Ntn3   | PSR1700014288.mm.1 | -2,69  | 0,010608 | 0,422786 | Alternative 3' Acce 0,22 |
| TC1700001620.mm.1 | 1,96 Tbc1d24; Ntn3   | PSR1700014287.mm.1 | -2,76  | 0,024122 | 0,493227 | Cassette Exon 0,29       |
| TC1700001620.mm.1 | 1,96 Tbc1d24; Ntn3   | JUC1700007764.mm.1 | -2,93  | 0,008004 | 0,403872 |                          |
| TC1700001620.mm.1 | 1,96 Tbc1d24; Ntn3   | JUC1700007773.mm.1 | -2,99  | 0,028066 | 0,505968 |                          |
| TC1700001620.mm.1 | 1,96 Tbc1d24; Ntn3   | PSR1700014277.mm.1 | -3,02  | 0,034874 | 0,526858 | Cassette Exon 0,24       |
| TC1700001620.mm.1 | 1,96 Tbc1d24; Ntn3   | PSR1700014285.mm.1 | -4,31  | 0,003773 | 0,357586 | Cassette Exon 0,28       |
| TC0X00001508.mm.1 | 1,07 Fgd1            | PSR0X00009422.mm.1 | 2,19   | 0,003606 | 0,356223 | Alternative 5' Donc 0,22 |
| TC0X00001508.mm.1 | 1,07 Fgd1            | PSR0X00009421.mm.1 | -2,31  | 0,030501 | 0,51337  | Cassette Exon 0,15       |
| TC1000003207.mm.1 | 4,91 Neurod4         | PSR1000023994.mm.1 | 2,19   | 0,003564 | 0,356223 | Cassette Exon 0,03       |
| TC1000003207.mm.1 | 4,91 Neurod4         | PSR1000023995.mm.1 | -2,19  | 0,003564 | 0,356223 | Cassette Exon 0,19       |
| TC1500000733.mm.1 | 1,85 CsdC2           | PSR1500005733.mm.1 | 2,19   | 0,009994 | 0,418456 | Alternative 5' Donc 0,19 |
| TC1500000733.mm.1 | 1,85 CsdC2           | PSR1500005734.mm.1 | -2,02  | 0,025752 | 0,498405 | Alternative 3' Acce 0,16 |
| TC0100002210.mm.1 | -1,54 Mitd1          | PSR0100017809.mm.1 | 2,19   | 0,001886 | 0,338712 | Alternative 3' Acce 0,18 |
| TC0400004189.mm.1 | -1 Ccdc163           | PSR0400009408.mm.1 | 2,19   | 0,006574 | 0,39213  | Alternative 3' Acce 0,18 |
| TC1100000637.mm.1 | -1,04 Hint1          | PSR1100005143.mm.1 | 2,19   | 0,010536 | 0,422281 | Alternative 3' Acce 0,18 |
| TC0300002657.mm.1 | 1,76 Fam19a3         | JUC0300010758.mm.1 | 2,19   | 0,041429 | 0,544646 |                          |
| TC0300002657.mm.1 | 1,76 Fam19a3         | PSR0300020694.mm.1 | -2,6   | 0,039734 | 0,540494 | Cassette Exon 0,15       |
| TC0400000164.mm.1 | -1,01 Rmdn1; Gm12353 | PSR0400001035.mm.1 | 2,19   | 0,012532 | 0,43545  | Cassette Exon 0,15       |

|                   |                            |                    |       |          |          |                     |      |
|-------------------|----------------------------|--------------------|-------|----------|----------|---------------------|------|
| TC0800001928.mm.1 | 1,24 Hook3                 | PSR0800015454.mm.1 | 2,19  | 0,01659  | 0,459691 | Cassette Exon       | 0,14 |
| TC1600001050.mm.1 | -1,71 Chaf1b               | PSR1600008184.mm.1 | 2,19  | 0,02985  | 0,511132 | Alternative 5' Donc | 0,14 |
| TC0200000798.mm.1 | 1,2 Epc2                   | PSR0200006613.mm.1 | 2,19  | 0,012815 | 0,437459 | Cassette Exon       | 0,13 |
| TC0700002856.mm.1 | -1,46 Pcd5; Gm3837         | PSR0700025539.mm.1 | 2,19  | 0,04033  | 0,541841 | Alternative 5' Donc | 0,13 |
| TC0500000337.mm.1 | -1,37 Plb1                 | PSR0500003083.mm.1 | 2,19  | 0,028031 | 0,505851 | Cassette Exon       | 0,12 |
| TC1700000009.mm.1 | -1,04 Tiam2                | PSR1700000087.mm.1 | 2,19  | 0,047985 | 0,559574 | Cassette Exon       | 0,12 |
| TC1700000009.mm.1 | -1,04 Tiam2                | JUC1700000032.mm.1 | -2,02 | 0,04228  | 0,547133 |                     |      |
| TC0800003160.mm.1 | 1,5 Ccsap                  | PSR0800024242.mm.1 | 2,19  | 0,017902 | 0,466466 | Cassette Exon       | 0,11 |
| TC0800003160.mm.1 | 1,5 Ccsap                  | JUC0800013225.mm.1 | -3,64 | 0,015211 | 0,452773 |                     |      |
| TC1100001015.mm.1 | -1,09 Itgae                | PSR1100009204.mm.1 | 2,19  | 0,017915 | 0,466466 | Cassette Exon       | 0,11 |
| TC1700002755.mm.1 | -1,27 Mett14               | PSR1700024694.mm.1 | 2,19  | 0,02301  | 0,48912  | Cassette Exon       | 0,05 |
| TC1400002843.mm.1 | -1,35 LOC100861615; Gm3411 | JUC1400005477.mm.1 | 2,19  | 0,033404 | 0,522793 |                     |      |
| TC1400000112.mm.1 | -1,03 Il3ra                | JUC1400000542.mm.1 | 2,19  | 0,011087 | 0,425935 |                     |      |
| TC1200000622.mm.1 | -1,18 Lrrc9                | JUC1200002401.mm.1 | 2,19  | 0,029611 | 0,510558 |                     |      |
| TC1300002269.mm.1 | -1,08 Mtrr                 | JUC1300007729.mm.1 | 2,19  | 0,029442 | 0,510013 |                     |      |
| TC1300000887.mm.1 | -1,05 Slc12a7              | JUC1300003023.mm.1 | 2,19  | 0,011903 | 0,431543 |                     |      |
| TC1300000908.mm.1 | 1,22 Pcsk1                 | JUC1300003123.mm.1 | 2,19  | 0,0406   | 0,542474 |                     |      |
| TC1300000908.mm.1 | 1,22 Pcsk1                 | JUC1300003120.mm.1 | 2,04  | 0,014834 | 0,451201 |                     |      |
| TC1700002467.mm.1 | 1,01                       | JUC1700012163.mm.1 | 2,19  | 0,028992 | 0,508842 |                     |      |
| TC1700002467.mm.1 | 1,01                       | JUC1700012162.mm.1 | -2,49 | 0,02133  | 0,481727 |                     |      |
| TC1700002298.mm.1 | 1,06 Pot1b                 | JUC1700011450.mm.1 | 2,19  | 0,036578 | 0,531424 |                     |      |
| TC1900000165.mm.1 | 1,56 Ganab                 | JUC1900001113.mm.1 | 2,19  | 0,026473 | 0,501252 |                     |      |
| TC1900000165.mm.1 | 1,56 Ganab                 | JUC1900001112.mm.1 | -2,17 | 0,002107 | 0,342919 |                     |      |
| TC1500001211.mm.1 | -1,05                      | JUC1500005515.mm.1 | 2,19  | 0,002819 | 0,352207 |                     |      |
| TC0200001377.mm.1 | 1,09 Lrp4                  | JUC0200005405.mm.1 | 2,19  | 0,004824 | 0,371476 |                     |      |
| TC0800001144.mm.1 | -1,08 Setd6                | JUC0800004844.mm.1 | 2,19  | 0,039118 | 0,538475 |                     |      |
| TC0500002251.mm.1 | 1,03 4931431C16Rik         | JUC0500011237.mm.1 | 2,19  | 0,015944 | 0,456831 |                     |      |
| TC0500003549.mm.1 | -1,12 Rbak                 | JUC0500017690.mm.1 | 2,19  | 0,005905 | 0,383835 |                     |      |
| TC0600000236.mm.1 | -1,15 Irf5                 | JUC0600000831.mm.1 | 2,19  | 0,023304 | 0,49004  |                     |      |
| TC1000003018.mm.1 | -1,14 Helb                 | JUC1000012355.mm.1 | 2,19  | 0,006287 | 0,388916 |                     |      |
| TC1000003018.mm.1 | -1,14 Helb                 | JUC1000012353.mm.1 | 2,04  | 0,019297 | 0,473074 |                     |      |
| TC0300001313.mm.1 | -1,24 Cfi                  | JUC0300005541.mm.1 | 2,19  | 0,043899 | 0,550649 |                     |      |
| TC1100001875.mm.1 | 1,74 Ttyh2                 | JUC1100009117.mm.1 | 2,19  | 0,02995  | 0,511499 |                     |      |
| TC1100001875.mm.1 | 1,74 Ttyh2                 | PSR1100017532.mm.1 | -2,07 | 0,004604 | 0,369794 |                     |      |
| TC0500000138.mm.1 | 1,23 Magi2                 | JUC0500000647.mm.1 | 2,19  | 0,022234 | 0,485896 |                     |      |
| TC0500000138.mm.1 | 1,23 Magi2                 | JUC0500000664.mm.1 | -2,06 | 0,017487 | 0,463964 |                     |      |
| TC0400002797.mm.1 | -1,02 Kif12                | JUC0400011972.mm.1 | 2,19  | 0,029755 | 0,511132 |                     |      |
| TC0400002797.mm.1 | -1,02 Kif12                | JUC0400011970.mm.1 | -2,4  | 0,015831 | 0,456083 |                     |      |
| TC0Y00000173.mm.1 | -1,42 Gm20885              | JUC0Y00000645.mm.1 | 2,19  | 0,006603 | 0,39213  |                     |      |
| TC0X00002660.mm.1 | 2,28 Arhgef9               | JUC0X00008444.mm.1 | 2,18  | 0,000398 | 0,29748  |                     |      |
| TC0X00002660.mm.1 | 2,28 Arhgef9               | JUC0X00008454.mm.1 | 2,11  | 0,034607 | 0,52602  |                     |      |
| TC0X00002660.mm.1 | 2,28 Arhgef9               | PSR0X00016640.mm.1 | -2,04 | 0,009525 | 0,416602 | Intron Retention    | 0,3  |
| TC0X00002660.mm.1 | 2,28 Arhgef9               | PSR0X00016644.mm.1 | -2,05 | 0,016606 | 0,459802 | Intron Retention    | 0,3  |
| TC0X00002660.mm.1 | 2,28 Arhgef9               | PSR0X00016662.mm.1 | -2,05 | 0,04764  | 0,558743 | Alternative 5' Donc | 0,05 |
| TC0X00002660.mm.1 | 2,28 Arhgef9               | PSR0X00016670.mm.1 | -2,13 | 0,040572 | 0,542455 | Cassette Exon       | 0,14 |
| TC0X00002660.mm.1 | 2,28 Arhgef9               | PSR0X00016639.mm.1 | -2,37 | 0,004409 | 0,366753 | Intron Retention    | 0,3  |
| TC0X00002660.mm.1 | 2,28 Arhgef9               | PSR0X00016665.mm.1 | -2,37 | 0,012534 | 0,43545  | Alternative 5' Donc | 0,11 |
| TC0X00002660.mm.1 | 2,28 Arhgef9               | JUC0X00008468.mm.1 | -2,37 | 0,009777 | 0,417839 |                     |      |

|                   |                             |                    |       |          |                              |      |
|-------------------|-----------------------------|--------------------|-------|----------|------------------------------|------|
| TC0X00002660.mm.1 | 2,28 Arhgef9                | JUC0X00008460.mm.1 | -2,57 | 0,000783 | 0,309887                     |      |
| TC0X00002660.mm.1 | 2,28 Arhgef9                | PSR0X00016645.mm.1 | -2,68 | 0,038759 | 0,537385 Intron Retention    | 0,3  |
| TC0X00002660.mm.1 | 2,28 Arhgef9                | PSR0X00016669.mm.1 | -2,85 | 0,015102 | 0,452453 Cassette Exon       | 0,24 |
| TC0X00002660.mm.1 | 2,28 Arhgef9                | JUC0X00008456.mm.1 | -2,88 | 0,031821 | 0,517751                     |      |
| TC0X00002660.mm.1 | 2,28 Arhgef9                | PSR0X00016666.mm.1 | -3,13 | 0,016857 | 0,460797 Cassette Exon       | 0,18 |
| TC0X00002660.mm.1 | 2,28 Arhgef9                | PSR0X00016643.mm.1 | -3,31 | 0,0264   | 0,50115 Intron Retention     | 0,3  |
| TC0X00002660.mm.1 | 2,28 Arhgef9                | JUC0X00008463.mm.1 | -3,5  | 0,001559 | 0,331143                     |      |
| TC0300001242.mm.1 | 2,93 Abca4                  | JUC0300005268.mm.1 | 2,18  | 0,013171 | 0,440567                     |      |
| TC0300001242.mm.1 | 2,93 Abca4                  | PSR0300010061.mm.1 | 2,08  | 0,012851 | 0,437778 Cassette Exon       | 0,11 |
| TC0300001242.mm.1 | 2,93 Abca4                  | PSR0300010069.mm.1 | -2,25 | 0,015188 | 0,452699 Cassette Exon       | 0,28 |
| TC0300001242.mm.1 | 2,93 Abca4                  | PSR0300010063.mm.1 | -2,38 | 0,006244 | 0,388361 Cassette Exon       | 0,28 |
| TC0300001242.mm.1 | 2,93 Abca4                  | PSR0300010062.mm.1 | -2,47 | 0,03707  | 0,532747 Cassette Exon       | 0,29 |
| TC0300001242.mm.1 | 2,93 Abca4                  | PSR0300010120.mm.1 | -2,65 | 0,019469 | 0,474209 Alternative 5' Donc | 0,12 |
| TC0300001242.mm.1 | 2,93 Abca4                  | JUC0300005285.mm.1 | -2,69 | 0,001627 | 0,332831                     |      |
| TC0300001242.mm.1 | 2,93 Abca4                  | JUC0300005258.mm.1 | -2,98 | 0,006807 | 0,393762                     |      |
| TC0300001242.mm.1 | 2,93 Abca4                  | JUC0300005284.mm.1 | -3,14 | 0,001523 | 0,330287                     |      |
| TC0300001242.mm.1 | 2,93 Abca4                  | JUC0300005278.mm.1 | -4,31 | 0,007506 | 0,401057                     |      |
| TC0300001242.mm.1 | 2,93 Abca4                  | JUC0300005281.mm.1 | -5,12 | 0,005286 | 0,378059                     |      |
| TC0300001242.mm.1 | 2,93 Abca4                  | JUC0300005282.mm.1 | -6,43 | 0,000438 | 0,297771                     |      |
| TC0300001242.mm.1 | 2,93 Abca4                  | JUC0300005286.mm.1 | -6,88 | 0,00731  | 0,398847                     |      |
| TC0300001242.mm.1 | 2,93 Abca4                  | JUC0300005280.mm.1 | -8,12 | 0,000938 | 0,313363                     |      |
| TC0400003721.mm.1 | 1,42 Hmgn2; Gm7931; Gm9525  | PSR0400030528.mm.1 | 2,18  | 0,026129 | 0,499897 Intron Retention    | 0,29 |
| TC0400003721.mm.1 | 1,42 Hmgn2; Gm7931; Gm9525  | JUC0400015882.mm.1 | -2,54 | 0,024898 | 0,495661                     |      |
| TC0800002580.mm.1 | 1,4 Ccdc130                 | PSR0800019689.mm.1 | 2,18  | 0,042836 | 0,548097 Alternative 3' Acce | 0,19 |
| TC0800002580.mm.1 | 1,4 Ccdc130                 | PSR0800019685.mm.1 | -2,53 | 0,020251 | 0,477245 Alternative 5' Donc | 0,25 |
| TC0200004221.mm.1 | 1,05 Pdhx                   | PSR0200035432.mm.1 | 2,18  | 0,034217 | 0,525138 Alternative 5' Donc | 0,19 |
| TC0200004221.mm.1 | 1,05 Pdhx                   | JUC0200018108.mm.1 | 2,18  | 0,033468 | 0,522837                     |      |
| TC0100003314.mm.1 | -1,28                       | PSR0100027065.mm.1 | 2,18  | 0,014939 | 0,451968 Alternative 5' Donc | 0,19 |
| TC1700001010.mm.1 | -1,17 Safb                  | PSR1700009683.mm.1 | 2,18  | 0,002112 | 0,342919 Intron Retention    | 0,18 |
| TC1700001010.mm.1 | -1,17 Safb                  | PSR1700009685.mm.1 | 2,18  | 0,024288 | 0,49362 Cassette Exon        | 0,11 |
| TC0X00000063.mm.1 | -1,1 Gpkow                  | PSR0X00000337.mm.1 | 2,18  | 0,022056 | 0,485327 Alternative 5' Donc | 0,17 |
| TC0200003002.mm.1 | 1,31 Gm13269                | PSR0200024805.mm.1 | 2,18  | 0,003886 | 0,359225 Mutually Exclusive  | 0,15 |
| TC0200003002.mm.1 | 1,31 Gm13269                | PSR0200024804.mm.1 | -2,11 | 0,011337 | 0,427345 Mutually Exclusive  | 0,15 |
| TC1100000258.mm.1 | -1,45 4933430M04Rik; Gm1206 | PSR1100002216.mm.1 | 2,18  | 0,012733 | 0,436679 Cassette Exon       | 0,15 |
| TC1000002806.mm.1 | 1,55 Mett125                | PSR1000021308.mm.1 | 2,18  | 0,014819 | 0,451071 Cassette Exon       | 0,13 |
| TC1900000356.mm.1 | -1,06 Trpm3                 | JUC1900001809.mm.1 | 2,18  | 0,035576 | 0,528808                     |      |
| TC1900000356.mm.1 | -1,06 Trpm3                 | PSR1900003486.mm.1 | 2,09  | 0,035699 | 0,529027 Cassette Exon       | 0,13 |
| TC0300002934.mm.1 | 1,76 Lrit3                  | PSR0300023206.mm.1 | 2,18  | 0,030117 | 0,511997 Cassette Exon       | 0,12 |
| TC0X00002189.mm.1 | -1,36 Rap2c                 | PSR0X00013993.mm.1 | 2,18  | 0,00511  | 0,376191                     |      |
| TC0X00002189.mm.1 | -1,36 Rap2c                 | PSR0X00013996.mm.1 | 2,14  | 0,005043 | 0,374724 Cassette Exon       | 0,12 |
| TC0400000698.mm.1 | -1,61 Slc31a1               | PSR0400004899.mm.1 | 2,18  | 0,049382 | 0,562882 Intron Retention    | 0,11 |
| TC0400003689.mm.1 | -1,79                       | PSR0400030247.mm.1 | 2,18  | 0,022726 | 0,48778 Cassette Exon        | 0,11 |
| TC1700001013.mm.1 | -1,16 Catsperd              | PSR1700009733.mm.1 | 2,18  | 0,009769 | 0,417839 Cassette Exon       | 0,11 |
| TC0500002254.mm.1 | 1,47 Sorcs2                 | PSR0500020717.mm.1 | 2,18  | 0,014654 | 0,450098 Cassette Exon       | 0,1  |
| TC0500002254.mm.1 | 1,47 Sorcs2                 | JUC0500011277.mm.1 | -2,21 | 0,024414 | 0,493825                     |      |
| TC0900000922.mm.1 | 1,02 Bnip2                  | PSR0900007114.mm.1 | 2,18  | 0,021847 | 0,484607 Alternative 5' Donc | 0,1  |
| TC1200000496.mm.1 | 1,39 Gm17529                | PSR1200003445.mm.1 | 2,18  | 0,021263 | 0,481565 Cassette Exon       | 0,1  |
| TC1400002346.mm.1 | 1,13 Dmtn                   | JUC1400010099.mm.1 | 2,18  | 0,038743 | 0,537362                     |      |



|                   |                               |                    |       |          |                              |      |
|-------------------|-------------------------------|--------------------|-------|----------|------------------------------|------|
| TC1200000725.mm.1 | -1,19                         | JUC1200002941.mm.1 | 2,18  | 0,039238 | 0,538875                     |      |
| TC1200000528.mm.1 | 1,09 Fancm                    | JUC1200002058.mm.1 | 2,18  | 0,011375 | 0,427487                     |      |
| TC0200003867.mm.1 | -1,27 Gm13710                 | JUC0200017234.mm.1 | 2,18  | 0,038442 | 0,536405                     |      |
| TC1300000938.mm.1 | -1,08 Fam172a                 | JUC1300003248.mm.1 | 2,18  | 0,041258 | 0,544166                     |      |
| TC1300000724.mm.1 | -1,63 Naa35                   | JUC1300002485.mm.1 | 2,18  | 0,048182 | 0,560082                     |      |
| TC1700002324.mm.1 | -1,04 Ptprs                   | JUC1700011613.mm.1 | 2,18  | 0,012818 | 0,437471                     |      |
| TC1700001384.mm.1 | 1,82 Tmem181b-ps; Tmem181c    | JUC1700006794.mm.1 | 2,18  | 0,009795 | 0,417839                     |      |
| TC1700000949.mm.1 | -1,12 Kif6                    | JUC1700004887.mm.1 | 2,18  | 0,024264 | 0,4935                       |      |
| TC1700001075.mm.1 | 1,03 Ppp4r1                   | JUC1700005463.mm.1 | 2,18  | 0,031255 | 0,516001                     |      |
| TC0100001680.mm.1 | 1,6 Desi2                     | JUC0100007906.mm.1 | 2,18  | 0,047646 | 0,558744                     |      |
| TC1900000582.mm.1 | -1,04 Zfp518a; Mir8092; mmu-r | JUC1900002833.mm.1 | 2,18  | 0,025152 | 0,496542                     |      |
| TC0200005480.mm.1 | -1,21 Capn3                   | JUC0200006828.mm.1 | 2,18  | 0,009166 | 0,413447                     |      |
| TC1700000692.mm.1 | -1,01 Cchr1                   | JUC1700003892.mm.1 | 2,18  | 0,023889 | 0,492304                     |      |
| TC1700000663.mm.1 | -1,15 Ddah2                   | JUC1700003692.mm.1 | 2,18  | 0,001387 | 0,325997                     |      |
| TC1700000663.mm.1 | -1,15 Ddah2                   | JUC1700003691.mm.1 | 2,05  | 0,015644 | 0,455298                     |      |
| TC1600000666.mm.1 | -1,33 Cd200r3                 | JUC1600003046.mm.1 | 2,18  | 0,038528 | 0,536634                     |      |
| TC1600000666.mm.1 | -1,33 Cd200r3                 | JUC1600003052.mm.1 | -4,01 | 0,020197 | 0,477145                     |      |
| TC1600001390.mm.1 | -1,96 Rfc4                    | JUC1600006028.mm.1 | 2,18  | 0,004811 | 0,371408                     |      |
| TC0700004553.mm.1 | 2,11 Dusp8                    | JUC0700020242.mm.1 | 2,18  | 0,007341 | 0,399144                     |      |
| TC0800000874.mm.1 | -1,34 Zfp827                  | JUC0800003471.mm.1 | 2,18  | 0,000714 | 0,306015                     |      |
| TC0900001153.mm.1 | 1,06 Rasgrf1                  | JUC0900004922.mm.1 | 2,18  | 0,025839 | 0,498615                     |      |
| TC0900000835.mm.1 | -1,05 Clpx                    | JUC0900003448.mm.1 | 2,18  | 0,01392  | 0,446135                     |      |
| TC1100001133.mm.1 | -1,09 Myo18a                  | JUC1100005425.mm.1 | 2,18  | 0,030673 | 0,51384                      |      |
| TC1000002823.mm.1 | -1,14 Otogl                   | JUC1000011791.mm.1 | 2,18  | 0,020295 | 0,477245                     |      |
| TC1000002823.mm.1 | -1,14 Otogl                   | JUC1000011822.mm.1 | -2,74 | 0,042348 | 0,547408                     |      |
| TC1000002233.mm.1 | -1,27 Cdh23                   | JUC1000008543.mm.1 | 2,18  | 0,038617 | 0,536942                     |      |
| TC1100003461.mm.1 | -1,48                         | JUC1100016643.mm.1 | 2,18  | 0,021869 | 0,484645                     |      |
| TC0300002659.mm.1 | -1,25 Mov10                   | JUC0300010785.mm.1 | 2,18  | 0,034268 | 0,5253                       |      |
| TC1100001448.mm.1 | -1,57 Col1a1                  | JUC1100007040.mm.1 | 2,18  | 0,030462 | 0,513244                     |      |
| TC1100001451.mm.1 | 1,14 Ppp1r9b                  | JUC1100007066.mm.1 | 2,18  | 0,036489 | 0,531207                     |      |
| TC0900003299.mm.1 | 1,05 Zdhhc3                   | JUC0900015640.mm.1 | 2,18  | 0,039743 | 0,540494                     |      |
| TC0900003299.mm.1 | 1,05 Zdhhc3                   | JUC0900015646.mm.1 | 2,11  | 0,031977 | 0,518183                     |      |
| TC0X00002078.mm.1 | -1,23 4930525M21Rik           | JUC0X00006732.mm.1 | 2,18  | 0,043532 | 0,549995                     |      |
| TC1100003882.mm.1 | 1,81 Nsf                      | JUC1100018986.mm.1 | 2,17  | 0,040993 | 0,543577                     |      |
| TC1100003882.mm.1 | 1,81 Nsf                      | PSR1100036328.mm.1 | -2,18 | 0,029715 | 0,511008 Alternative 3' Acce | 0,22 |
| TC1100003882.mm.1 | 1,81 Nsf                      | PSR1100036341.mm.1 | -2,57 | 0,013374 | 0,442285 Cassette Exon       | 0,16 |
| TC1100003882.mm.1 | 1,81 Nsf                      | JUC1100019006.mm.1 | -2,76 | 0,049909 | 0,563808                     |      |
| TC1100003882.mm.1 | 1,81 Nsf                      | PSR1100036310.mm.1 | -2,82 | 0,020814 | 0,479514 Alternative 5' Donc | 0,29 |
| TC1100003882.mm.1 | 1,81 Nsf                      | PSR1100036311.mm.1 | -2,9  | 0,026502 | 0,501298 Alternative 3' Acce | 0,3  |
| TC1100003882.mm.1 | 1,81 Nsf                      | JUC1100019005.mm.1 | -2,95 | 0,01317  | 0,440567                     |      |
| TC1100003882.mm.1 | 1,81 Nsf                      | PSR1100036344.mm.1 | -3,4  | 0,040978 | 0,543537                     |      |
| TC1100003882.mm.1 | 1,81 Nsf                      | PSR1100036343.mm.1 | -3,41 | 0,013948 | 0,446234 Cassette Exon       | 0,3  |
| TC1100003882.mm.1 | 1,81 Nsf                      | PSR1100036333.mm.1 | -4,14 | 0,014641 | 0,450098 Intron Retention    | 0,75 |
| TC1100003882.mm.1 | 1,81 Nsf                      | JUC1100019007.mm.1 | -6,46 | 0,007558 | 0,401384                     |      |
| TC0200001806.mm.1 | 1,82 Adal                     | JUC0200006961.mm.1 | 2,17  | 0,017598 | 0,464312                     |      |
| TC0200001806.mm.1 | 1,82 Adal                     | JUC0200006970.mm.1 | -2,05 | 0,046075 | 0,555658                     |      |
| TC0200001806.mm.1 | 1,82 Adal                     | PSR0200013919.mm.1 | -2,41 | 0,022218 | 0,485896 Alternative 3' Acce | 0,15 |
| TC0200001806.mm.1 | 1,82 Adal                     | PSR0200013939.mm.1 | -3,16 | 0,006961 | 0,395722 Cassette Exon       | 0,35 |

|                   |                    |                    |       |          |                              |      |
|-------------------|--------------------|--------------------|-------|----------|------------------------------|------|
| TC0200001806.mm.1 | 1,82 Adal          | JUC0200006971.mm.1 | -4,37 | 0,011704 | 0,429969                     |      |
| TC1300001043.mm.1 | 1,32 Homer1        | JUC1300003480.mm.1 | 2,17  | 0,028599 | 0,507685                     |      |
| TC1300001043.mm.1 | 1,32 Homer1        | PSR1300006673.mm.1 | -2,62 | 0,049215 | 0,562465 Alternative 5' Donc | 0,26 |
| TC1300001043.mm.1 | 1,32 Homer1        | JUC1300003491.mm.1 | -2,62 | 0,007944 | 0,403819                     |      |
| TC1300001043.mm.1 | 1,32 Homer1        | JUC1300003483.mm.1 | -4,18 | 0,02937  | 0,509995                     |      |
| TC1000000834.mm.1 | -1,54 Cnn2         | PSR1000006122.mm.1 | 2,17  | 0,04354  | 0,549995 Alternative 5' Donc | 0,19 |
| TC0900001037.mm.1 | -2,34 Khlh31       | PSR0900008122.mm.1 | 2,17  | 0,01365  | 0,444359 Alternative 3' Acce | 0,18 |
| TC1900001758.mm.1 | 1,19 5830428H23Rik | JUC1900008632.mm.1 | 2,17  | 0,011275 | 0,426793                     |      |
| TC1900001758.mm.1 | 1,19 5830428H23Rik | PSR1900015537.mm.1 | -2,06 | 0,007255 | 0,39826 Alternative 3' Acce  | 0,16 |
| TC1900001758.mm.1 | 1,19 5830428H23Rik | PSR1900015515.mm.1 | -2,46 | 0,009175 | 0,413547 Cassette Exon       | 0,15 |
| TC1900000082.mm.1 | -1,39 Ltbp3        | PSR1900000972.mm.1 | 2,17  | 0,00398  | 0,360363 Cassette Exon       | 0,13 |
| TC0300002973.mm.1 | 1,05 Gstcd         | PSR0300023480.mm.1 | 2,17  | 0,003451 | 0,3554 Cassette Exon         | 0,12 |
| TC0300002973.mm.1 | 1,05 Gstcd         | JUC0300012260.mm.1 | 2,08  | 0,028603 | 0,507714                     |      |
| TC0300002973.mm.1 | 1,05 Gstcd         | PSR0300023464.mm.1 | -2,06 | 0,042308 | 0,547224 Cassette Exon       | 0,12 |
| TC0100003476.mm.1 | 1,25 Gm16701       | PSR0100028481.mm.1 | 2,17  | 0,016366 | 0,458693 Cassette Exon       | 0,11 |
| TC0300001260.mm.1 | 2,16 Tram1l1       | PSR0300010292.mm.1 | 2,17  | 0,008486 | 0,406895 Cassette Exon       | 0,11 |
| TC0700000002.mm.1 | -2,12 Speer9-ps1   | PSR0700000008.mm.1 | 2,17  | 0,023948 | 0,4926 Cassette Exon         | 0,09 |
| TC1900001636.mm.1 | -1,29 Col17a1      | PSR1900014489.mm.1 | 2,17  | 0,013492 | 0,443193 Cassette Exon       | 0,09 |
| TC1900001636.mm.1 | -1,29 Col17a1      | JUC1900008013.mm.1 | -2,17 | 0,014301 | 0,448073                     |      |
| TC1400002309.mm.1 | -1,7               | JUC1400009841.mm.1 | 2,17  | 0,0292   | 0,509482                     |      |
| TC1100004233.mm.1 | -1,12 Fasn         | JUC1100021271.mm.1 | 2,17  | 0,049217 | 0,562473                     |      |
| TC1300002250.mm.1 | -1,31 Zfp874b      | JUC1300007653.mm.1 | 2,17  | 0,012909 | 0,438243                     |      |
| TC1700002331.mm.1 | 1,72 Safb2         | JUC1700011648.mm.1 | 2,17  | 0,018307 | 0,468049                     |      |
| TC1700002331.mm.1 | 1,72 Safb2         | JUC1700011635.mm.1 | -2,27 | 0,039596 | 0,539903                     |      |
| TC1800000240.mm.1 | -1,34 Sap130       | JUC1800001005.mm.1 | 2,17  | 0,047906 | 0,55942                      |      |
| TC1800000564.mm.1 | -1,34 Gramd3       | JUC1800002234.mm.1 | 2,17  | 0,029731 | 0,511096                     |      |
| TC1700002071.mm.1 | -1,81 H2-M2        | JUC1700010417.mm.1 | 2,17  | 0,007468 | 0,400381                     |      |
| TC1900000683.mm.1 | 1,03 Nolc1         | JUC1900003238.mm.1 | 2,17  | 0,030993 | 0,514779                     |      |
| TC1500000736.mm.1 | -1,08 Xrcc6        | JUC1500003242.mm.1 | 2,17  | 0,049551 | 0,563325                     |      |
| TC0800002235.mm.1 | -1,17 Neil3        | JUC0800009227.mm.1 | 2,17  | 0,034507 | 0,525929                     |      |
| TC0700004519.mm.1 | -1,28 Sigirr       | JUC0700019975.mm.1 | 2,17  | 0,016194 | 0,458125                     |      |
| TC0700004328.mm.1 | 1,05 Zfp689        | JUC0700019176.mm.1 | 2,17  | 0,018215 | 0,4676                       |      |
| TC0800000948.mm.1 | 1,1 4930432K21Rik  | JUC0800003761.mm.1 | 2,17  | 0,025986 | 0,499207                     |      |
| TC0900001604.mm.1 | -1,09 Entpd3       | JUC0900007559.mm.1 | 2,17  | 0,000005 | 0,179072                     |      |
| TC0800002831.mm.1 | 1,05 Acd           | JUC0800011904.mm.1 | 2,17  | 0,034423 | 0,525828                     |      |
| TC0600000758.mm.1 | 1,2 Smarcd1        | JUC0600002848.mm.1 | 2,17  | 0,004765 | 0,371039                     |      |
| TC0600000758.mm.1 | 1,2 Smarcd1        | JUC0600002843.mm.1 | -6,89 | 0,029462 | 0,510123                     |      |
| TC0600001712.mm.1 | 1,18 Lyrn5         | JUC0600007145.mm.1 | 2,17  | 0,021053 | 0,480262                     |      |
| TC0600001639.mm.1 | -1,73 Mgst1        | PSR0600013062.mm.1 | 2,17  | 0,04081  | 0,543231                     |      |
| TC1100000851.mm.1 | -2,12 Myh3         | JUC1100003504.mm.1 | 2,17  | 0,031622 | 0,517405                     |      |
| TC0300002199.mm.1 | -1,24 Etfdh        | JUC0300008665.mm.1 | 2,17  | 0,049448 | 0,563157                     |      |
| TC0X00000641.mm.1 | -1,13              | JUC0X00002002.mm.1 | 2,17  | 0,005677 | 0,382164                     |      |
| TC0400002786.mm.1 | -1,11 Fkbp15       | JUC0400011888.mm.1 | 2,17  | 0,01358  | 0,443703                     |      |
| TC0400002786.mm.1 | -1,11 Fkbp15       | JUC0400011866.mm.1 | 2,02  | 0,020734 | 0,479166                     |      |
| TC0400002007.mm.1 | -1 Dnajc11         | JUC0400008578.mm.1 | 2,17  | 0,046732 | 0,556856                     |      |
| TC1000000907.mm.1 | 1,79 Gm10778       | JUC1000003928.mm.1 | 2,17  | 0,031406 | 0,516484                     |      |
| TC1000001089.mm.1 | 1,64 Uhrf1bp1l     | JUC1000004430.mm.1 | 2,17  | 0,038586 | 0,536862                     |      |
| TC1000000647.mm.1 | -1,07 Rtkn2        | JUC1000002402.mm.1 | 2,17  | 0,005596 | 0,381115                     |      |

|                   |             |                    |       |          |          |                          |
|-------------------|-------------|--------------------|-------|----------|----------|--------------------------|
| TC0400002434.mm.1 | -1,2 Ddx58  | JUC0400010214.mm.1 | 2,17  | 0,04115  | 0,544    |                          |
| TC0300001130.mm.1 | 5,57 Gnat2  | JUC0300004740.mm.1 | 2,16  | 0,013091 | 0,439759 |                          |
| TC0300001130.mm.1 | 5,57 Gnat2  | PSR0300009186.mm.1 | 2,14  | 0,01116  | 0,426295 | Cassette Exon 0,15       |
| TC0300001130.mm.1 | 5,57 Gnat2  | PSR0300009176.mm.1 | -2,22 | 0,003057 | 0,353892 | Cassette Exon 0,22       |
| TC0300001130.mm.1 | 5,57 Gnat2  | PSR0300009181.mm.1 | -2,39 | 0,031589 | 0,51718  | Alternative 5' Donc 0,18 |
| TC0300001130.mm.1 | 5,57 Gnat2  | PSR0300009177.mm.1 | -3,49 | 0,013325 | 0,441836 | Cassette Exon 0,16       |
| TC0300001130.mm.1 | 5,57 Gnat2  | JUC0300004745.mm.1 | -3,95 | 0,006846 | 0,393893 |                          |
| TC0300001130.mm.1 | 5,57 Gnat2  | PSR0300009174.mm.1 | -4,14 | 0,002388 | 0,348564 | Alternative 3' Acce 0,31 |
| TC0300001130.mm.1 | 5,57 Gnat2  | JUC0300004739.mm.1 | -4,5  | 0,012088 | 0,43255  |                          |
| TC0300001130.mm.1 | 5,57 Gnat2  | PSR0300009185.mm.1 | -4,6  | 0,000574 | 0,304044 | Cassette Exon 0,36       |
| TC0300001130.mm.1 | 5,57 Gnat2  | PSR0300009180.mm.1 | -4,91 | 0,000996 | 0,316361 | Alternative 5' Donc 0,48 |
| TC0300001130.mm.1 | 5,57 Gnat2  | JUC0300004737.mm.1 | -6,84 | 0,001069 | 0,31648  |                          |
| TC0300001130.mm.1 | 5,57 Gnat2  | JUC0300004746.mm.1 | -7,01 | 0,007314 | 0,398848 |                          |
| TC0300001130.mm.1 | 5,57 Gnat2  | PSR0300009168.mm.1 | -7,55 | 0,002758 | 0,350151 | Alternative 3' Acce 0,39 |
| TC0300001271.mm.1 | 2,51 Camk2d | PSR0300010359.mm.1 | 2,16  | 0,008227 | 0,405976 |                          |
| TC0300001271.mm.1 | 2,51 Camk2d | PSR0300010344.mm.1 | -2,07 | 0,018969 | 0,471398 | Alternative 3' Acce 0,18 |
| TC0300001271.mm.1 | 2,51 Camk2d | PSR0300010348.mm.1 | -2,15 | 0,009365 | 0,41517  | Alternative 3' Acce 0,18 |
| TC0300001271.mm.1 | 2,51 Camk2d | JUC0300005433.mm.1 | -2,33 | 0,038416 | 0,536405 |                          |
| TC0300001271.mm.1 | 2,51 Camk2d | PSR0300010382.mm.1 | -2,55 | 0,015119 | 0,452652 | Cassette Exon 0,09       |
| TC0300001271.mm.1 | 2,51 Camk2d | PSR0300010339.mm.1 | -2,62 | 0,04189  | 0,545772 | Alternative 3' Acce 0,18 |
| TC0300001271.mm.1 | 2,51 Camk2d | PSR0300010363.mm.1 | -2,8  | 0,042012 | 0,546109 | Alternative 3' Acce 0,24 |
| TC0300001271.mm.1 | 2,51 Camk2d | PSR0300010364.mm.1 | -2,82 | 0,011995 | 0,432286 | Alternative 3' Acce 0,24 |
| TC0300001271.mm.1 | 2,51 Camk2d | JUC0300005432.mm.1 | -2,91 | 0,005561 | 0,380776 |                          |
| TC0300001271.mm.1 | 2,51 Camk2d | PSR0300010397.mm.1 | -2,93 | 0,012016 | 0,432286 | Alternative 5' Donc 0,26 |
| TC0300001271.mm.1 | 2,51 Camk2d | PSR0300010388.mm.1 | -3,55 | 0,003193 | 0,354243 | Alternative 5' Donc 0,38 |
| TC0300001271.mm.1 | 2,51 Camk2d | PSR0300010368.mm.1 | -3,73 | 0,015161 | 0,452699 | Alternative 3' Acce 0,43 |
| TC0300001271.mm.1 | 2,51 Camk2d | JUC0300005439.mm.1 | -3,81 | 0,012043 | 0,432309 |                          |
| TC0300001271.mm.1 | 2,51 Camk2d | JUC0300005429.mm.1 | -3,94 | 0,002205 | 0,345178 |                          |
| TC0300001271.mm.1 | 2,51 Camk2d | PSR0300010367.mm.1 | -4,33 | 0,028384 | 0,50695  | Intron Retention 0,36    |
| TC0300001271.mm.1 | 2,51 Camk2d | JUC0300005440.mm.1 | -4,37 | 0,004726 | 0,370888 |                          |
| TC0300001271.mm.1 | 2,51 Camk2d | JUC0300005426.mm.1 | -4,55 | 0,002096 | 0,342919 |                          |
| TC1600001993.mm.1 | 4,12 Grik1  | JUC1600007998.mm.1 | 2,16  | 0,032143 | 0,518586 |                          |
| TC1600001993.mm.1 | 4,12 Grik1  | PSR1600015471.mm.1 | -2,08 | 0,020979 | 0,480052 | Alternative 3' Acce 0,11 |
| TC1600001993.mm.1 | 4,12 Grik1  | PSR1600015469.mm.1 | -2,11 | 0,012859 | 0,437778 |                          |
| TC1600001993.mm.1 | 4,12 Grik1  | JUC1600008003.mm.1 | -2,56 | 0,001452 | 0,328414 |                          |
| TC1600001993.mm.1 | 4,12 Grik1  | PSR1600015475.mm.1 | -2,67 | 0,016245 | 0,458312 | Alternative 3' Acce 0,25 |
| TC1600001993.mm.1 | 4,12 Grik1  | PSR1600015465.mm.1 | -2,94 | 0,022045 | 0,485297 | Cassette Exon 0,26       |
| TC1600001993.mm.1 | 4,12 Grik1  | PSR1600015466.mm.1 | -3,49 | 0,015031 | 0,452111 | Cassette Exon 0,28       |
| TC1600001993.mm.1 | 4,12 Grik1  | PSR1600015478.mm.1 | -3,63 | 0,009392 | 0,415597 | Alternative 3' Acce 0,4  |
| TC1600001993.mm.1 | 4,12 Grik1  | JUC1600008002.mm.1 | -8,55 | 0,002409 | 0,348653 |                          |
| TC1800001150.mm.1 | 1,25 Nme5   | PSR1800008398.mm.1 | 2,16  | 0,012346 | 0,43457  | Cassette Exon 0,09       |
| TC1800001150.mm.1 | 1,25 Nme5   | PSR1800008394.mm.1 | -3,49 | 0,03437  | 0,525628 | Alternative 3' Acce 0,4  |
| TC1500001171.mm.1 | 3,01 Egflam | PSR1500009396.mm.1 | 2,16  | 0,006992 | 0,395722 | Cassette Exon 0,13       |
| TC1500001171.mm.1 | 3,01 Egflam | JUC1500005289.mm.1 | 2,04  | 0,012119 | 0,432781 |                          |
| TC1500001171.mm.1 | 3,01 Egflam | PSR1500009371.mm.1 | -2,07 | 0,008715 | 0,409266 | Cassette Exon 0,19       |
| TC1500001171.mm.1 | 3,01 Egflam | JUC1500005280.mm.1 | -2,18 | 0,031202 | 0,515739 |                          |
| TC1500001171.mm.1 | 3,01 Egflam | PSR1500009401.mm.1 | -2,35 | 0,003727 | 0,357586 | Alternative 5' Donc 0,29 |
| TC1500001171.mm.1 | 3,01 Egflam | PSR1500009378.mm.1 | -2,54 | 0,003228 | 0,354243 | Alternative 3' Acce 0,25 |

|                   |                            |                    |       |          |                              |      |
|-------------------|----------------------------|--------------------|-------|----------|------------------------------|------|
| TC1500001171.mm.1 | 3,01 Egflam                | PSR1500009365.mm.1 | -2,56 | 0,008115 | 0,405267 Alternative 3' Acce | 0,25 |
| TC1500001171.mm.1 | 3,01 Egflam                | PSR1500009403.mm.1 | -2,73 | 0,031789 | 0,517596 Alternative 5' Donc | 0,29 |
| TC1500001171.mm.1 | 3,01 Egflam                | JUC1500005274.mm.1 | -2,87 | 0,000649 | 0,304044                     |      |
| TC1500001171.mm.1 | 3,01 Egflam                | PSR1500009390.mm.1 | -3,08 | 0,018802 | 0,470831 Cassette Exon       | 0,28 |
| TC1500001171.mm.1 | 3,01 Egflam                | PSR1500009375.mm.1 | -3,27 | 0,006965 | 0,395722 Alternative 5' Donc | 0,37 |
| TC1500001171.mm.1 | 3,01 Egflam                | PSR1500009404.mm.1 | -3,4  | 0,022338 | 0,486348 Alternative 5' Donc | 0,29 |
| TC1500001171.mm.1 | 3,01 Egflam                | JUC1500005285.mm.1 | -3,51 | 0,00179  | 0,336311                     |      |
| TC1000002420.mm.1 | 2,01 Adarb1                | JUC1000009645.mm.1 | 2,16  | 0,004633 | 0,36999                      |      |
| TC1000002420.mm.1 | 2,01 Adarb1                | PSR1000017575.mm.1 | -3,13 | 0,023229 | 0,490032 Cassette Exon       | 0,29 |
| TC1000002420.mm.1 | 2,01 Adarb1                | PSR1000017577.mm.1 | -3,16 | 0,015263 | 0,452932 Cassette Exon       | 0,29 |
| TC1000002420.mm.1 | 2,01 Adarb1                | JUC1000009656.mm.1 | -5,04 | 0,023051 | 0,48937                      |      |
| TC1800000665.mm.1 | 1,46 Nedd4l                | JUC1800002750.mm.1 | 2,16  | 0,034555 | 0,525975                     |      |
| TC1800000665.mm.1 | 1,46 Nedd4l                | JUC1800002744.mm.1 | -2,04 | 0,020471 | 0,478018                     |      |
| TC1800000665.mm.1 | 1,46 Nedd4l                | PSR1800004894.mm.1 | -2,09 | 0,021399 | 0,482036 Cassette Exon       | 0,28 |
| TC1800000665.mm.1 | 1,46 Nedd4l                | JUC1800002727.mm.1 | -2,12 | 0,044499 | 0,551741                     |      |
| TC1800000665.mm.1 | 1,46 Nedd4l                | PSR1800004879.mm.1 | -2,73 | 0,040031 | 0,541304 Cassette Exon       | 0,15 |
| TC1800000665.mm.1 | 1,46 Nedd4l                | JUC1800002725.mm.1 | -3,9  | 0,009995 | 0,418456                     |      |
| TC1400002497.mm.1 | -1,34 Gm10845              | PSR1400019195.mm.1 | 2,16  | 0,00586  | 0,383791 Alternative 3' Acce | 0,19 |
| TC0900000593.mm.1 | 4,13 Drd2                  | PSR0900004207.mm.1 | 2,16  | 0,006487 | 0,390655 Mutually Exclusive  | 0,18 |
| TC0900000593.mm.1 | 4,13 Drd2                  | PSR0900004208.mm.1 | -2,27 | 0,001462 | 0,328794 Mutually Exclusive  | 0,18 |
| TC0900000593.mm.1 | 4,13 Drd2                  | JUC0900002200.mm.1 | -3,46 | 0,000134 | 0,270905                     |      |
| TC1900000547.mm.1 | -1,63 Lgi1                 | PSR1900004896.mm.1 | 2,16  | 0,033577 | 0,52319 Alternative 3' Acce  | 0,17 |
| TC0600002142.mm.1 | -1,12 Clec5a               | PSR0600016914.mm.1 | 2,16  | 0,018964 | 0,471398 Alternative 5' Donc | 0,16 |
| TC0700002758.mm.1 | -1,54 Hcst                 | PSR0700024448.mm.1 | 2,16  | 0,038027 | 0,535494 Alternative 3' Acce | 0,16 |
| TC1500000356.mm.1 | 1,33 A930017M01Rik; 231006 | PSR1500002538.mm.1 | 2,16  | 0,038082 | 0,535633 Alternative 5' Donc | 0,15 |
| TC1800000457.mm.1 | 1,23 Dcp2                  | PSR1800003356.mm.1 | 2,16  | 0,024619 | 0,494589 Alternative 5' Donc | 0,15 |
| TC1700001750.mm.1 | 1,44 Tcp11                 | PSR1700016113.mm.1 | 2,16  | 0,004136 | 0,3623 Cassette Exon         | 0,11 |
| TC1700001750.mm.1 | 1,44 Tcp11                 | PSR1700016105.mm.1 | -2,52 | 0,023028 | 0,489236 Cassette Exon       | 0,13 |
| TC0400000149.mm.1 | -1,3 Mmp16                 | PSR0400000953.mm.1 | 2,16  | 0,036044 | 0,52965 Cassette Exon        | 0,12 |
| TC1100003093.mm.1 | -2,76 Alox15               | PSR1100028571.mm.1 | 2,16  | 0,027355 | 0,50383 Cassette Exon        | 0,12 |
| TC1200000161.mm.1 | -1,13 Gm5953               | PSR1200001332.mm.1 | 2,16  | 0,004892 | 0,372195 Cassette Exon       | 0,12 |
| TC0100003254.mm.1 | -1,15 Rnf2                 | JUC0100015069.mm.1 | 2,16  | 0,021708 | 0,484104                     |      |
| TC0100003254.mm.1 | -1,15 Rnf2                 | PSR0100026433.mm.1 | 2,03  | 0,008343 | 0,406435 Cassette Exon       | 0,11 |
| TC0200002293.mm.1 | -1,32 Rem1                 | PSR0200017920.mm.1 | 2,16  | 0,003978 | 0,360326 Cassette Exon       | 0,11 |
| TC1600000381.mm.1 | -2,18                      | PSR1600003633.mm.1 | 2,16  | 0,003148 | 0,353892 Cassette Exon       | 0,11 |
| TC1600000381.mm.1 | -2,18                      | PSR1600003634.mm.1 | -2,16 | 0,003148 | 0,353892 Cassette Exon       | 0,11 |
| TC1000000847.mm.1 | 1,16 Ndufs7                | PSR1000006412.mm.1 | 2,16  | 0,037727 | 0,534622 Alternative 5' Donc | 0,1  |
| TC1400002840.mm.1 | -1,04 Gm8206; Gm3642       | PSR1400010251.mm.1 | 2,16  | 0,016511 | 0,459491 Cassette Exon       | 0,1  |
| TC1600000322.mm.1 | -1,02 Dnajb11              | PSR1600003171.mm.1 | 2,16  | 0,001733 | 0,335996 Cassette Exon       | 0,1  |
| TC1400002427.mm.1 | 1,18 Cog3                  | JUC1400010378.mm.1 | 2,16  | 0,031077 | 0,515159                     |      |
| TC1200000751.mm.1 | 1,12 Smoc1                 | JUC1200003025.mm.1 | 2,16  | 0,028836 | 0,508414                     |      |
| TC0200005287.mm.1 | -1,13 Ctcf                 | JUC0200023230.mm.1 | 2,16  | 0,001413 | 0,326575                     |      |
| TC0200005287.mm.1 | -1,13 Ctcf                 | JUC0200023229.mm.1 | -2,67 | 0,005201 | 0,377042                     |      |
| TC1100003863.mm.1 | 1,15 Plcd3                 | JUC1100018857.mm.1 | 2,16  | 0,007921 | 0,403819                     |      |
| TC1300001139.mm.1 | -1,13 Taf9; Ak6; Gm12372   | JUC1300003773.mm.1 | 2,16  | 0,013443 | 0,442693                     |      |
| TC1300001447.mm.1 | -2,07 Actn2                | JUC1300004835.mm.1 | 2,16  | 0,029091 | 0,509063                     |      |
| TC1200002388.mm.1 | 1,07 1700001K19Rik         | JUC1200009118.mm.1 | 2,16  | 0,030255 | 0,512521                     |      |
| TC1200002388.mm.1 | 1,07 1700001K19Rik         | JUC1200009116.mm.1 | -3,21 | 0,007959 | 0,403853                     |      |

|                   |                                |                     |       |          |          |                          |
|-------------------|--------------------------------|---------------------|-------|----------|----------|--------------------------|
| TC1300000507.mm.1 | -1,1                           | JUC1300001585.mm.1  | 2,16  | 0,010869 | 0,424174 |                          |
| TC1300000571.mm.1 | -1,03 Nol8                     | JUC1300001823.mm.1  | 2,16  | 0,002811 | 0,352207 |                          |
| TC1800000593.mm.1 | -1,04 Adamts19                 | JUC1800002365.mm.1  | 2,16  | 0,007263 | 0,39826  |                          |
| TC1800000593.mm.1 | -1,04 Adamts19                 | JUC1800002369.mm.1  | -2,35 | 0,034512 | 0,525929 |                          |
| TC1700001792.mm.1 | -1,34                          | JUC1700008898.mm.1  | 2,16  | 0,042273 | 0,547092 |                          |
| TC0100000792.mm.1 | 1,2 Cops7b                     | JUC0100003791.mm.1  | 2,16  | 0,043144 | 0,548664 |                          |
| TC0100000792.mm.1 | 1,2 Cops7b                     | JUC0100003794.mm.1  | -2,19 | 0,047828 | 0,559283 |                          |
| TC1900000760.mm.1 | 1,25 Rbm20                     | JUC1900003651.mm.1  | 2,16  | 0,00377  | 0,357586 |                          |
| TC1400002701.mm.1 | -1,14 4930505G20Rik            | JUC14000011042.mm.1 | 2,16  | 0,031963 | 0,518173 |                          |
| TC0200000897.mm.1 | -1,32 Tanc1                    | JUC0200003680.mm.1  | 2,16  | 0,012443 | 0,43528  |                          |
| TC0200000897.mm.1 | -1,32 Tanc1                    | JUC0200003679.mm.1  | 2,02  | 0,037832 | 0,534803 |                          |
| TC0900000994.mm.1 | -1,17 RP23-339G10.1            | JUC0900004175.mm.1  | 2,16  | 0,033353 | 0,522553 |                          |
| TC0600003382.mm.1 | -1,15 Gm766                    | JUC0600013972.mm.1  | 2,16  | 0,011573 | 0,429058 |                          |
| TC0600002918.mm.1 | -1,26 Tada3                    | JUC0600011625.mm.1  | 2,16  | 0,036848 | 0,532256 |                          |
| TC0700001877.mm.1 | -1,12 Itgad                    | JUC0700008571.mm.1  | 2,16  | 0,02655  | 0,501435 |                          |
| TC1100001021.mm.1 | -1,13 Spata22; Olfr20          | JUC1100004912.mm.1  | 2,16  | 0,002819 | 0,352207 |                          |
| TC1100000922.mm.1 | -1,04 2010012P19Rik; Tnfsf13os | JUC1100004116.mm.1  | 2,16  | 0,036993 | 0,532502 |                          |
| TC1000002735.mm.1 | 1,26                           | PSR1000020990.mm.1  | 2,16  | 0,031297 | 0,516173 |                          |
| TC1000002735.mm.1 | 1,26                           | JUC1000011536.mm.1  | -2,96 | 0,037347 | 0,533573 |                          |
| TC0300002475.mm.1 | -1,01 Setdb1                   | JUC0300009982.mm.1  | 2,16  | 0,031651 | 0,517405 |                          |
| TC1100001378.mm.1 | -1,38 C030037D09Rik            | JUC1100006791.mm.1  | 2,16  | 0,001648 | 0,333988 |                          |
| TC0400003271.mm.1 | -1,37 Cdkn2c                   | JUC0400013567.mm.1  | 2,16  | 0,020033 | 0,476453 |                          |
| TC0900002917.mm.1 | -1,08 Gm6432                   | JUC0900013420.mm.1  | 2,16  | 0,019924 | 0,475902 |                          |
| TC0900002920.mm.1 | -1,24 Esyt3                    | JUC0900013443.mm.1  | 2,16  | 0,010012 | 0,418602 |                          |
| TC1000000126.mm.1 | 1,08 Repl1                     | JUC1000000424.mm.1  | 2,16  | 0,026256 | 0,500359 |                          |
| TC1000000126.mm.1 | 1,08 Repl1                     | JUC1000000446.mm.1  | -2,11 | 0,018012 | 0,466939 |                          |
| TC0100002081.mm.1 | 5,48 Bai3                      | JUC0100009654.mm.1  | 2,15  | 0,010486 | 0,421937 |                          |
| TC0100002081.mm.1 | 5,48 Bai3                      | PSR0100016984.mm.1  | -2,05 | 0,011392 | 0,427549 | Cassette Exon 0,24       |
| TC0100002081.mm.1 | 5,48 Bai3                      | PSR0100016961.mm.1  | -2,23 | 0,002494 | 0,349135 | Cassette Exon 0,2        |
| TC0100002081.mm.1 | 5,48 Bai3                      | JUC0100009650.mm.1  | -2,44 | 0,030028 | 0,511744 |                          |
| TC0100002081.mm.1 | 5,48 Bai3                      | PSR0100016985.mm.1  | -2,45 | 0,015613 | 0,455082 | Cassette Exon 0,27       |
| TC0100002081.mm.1 | 5,48 Bai3                      | PSR0100016963.mm.1  | -2,64 | 0,001478 | 0,329081 | Cassette Exon 0,34       |
| TC0100002081.mm.1 | 5,48 Bai3                      | JUC0100009665.mm.1  | -2,7  | 0,033691 | 0,523549 |                          |
| TC0100002081.mm.1 | 5,48 Bai3                      | PSR0100016982.mm.1  | -2,79 | 0,003915 | 0,359719 | Cassette Exon 0,26       |
| TC0100002081.mm.1 | 5,48 Bai3                      | JUC0100009649.mm.1  | -2,85 | 0,002929 | 0,352289 |                          |
| TC0100002081.mm.1 | 5,48 Bai3                      | PSR0100016990.mm.1  | -2,94 | 0,000316 | 0,288663 | Cassette Exon 0,15       |
| TC0100002081.mm.1 | 5,48 Bai3                      | PSR0100016996.mm.1  | -2,98 | 0,003033 | 0,353543 | Cassette Exon 0,37       |
| TC0100002081.mm.1 | 5,48 Bai3                      | PSR0100016980.mm.1  | -3,2  | 0,000154 | 0,272178 | Cassette Exon 0,25       |
| TC0100002081.mm.1 | 5,48 Bai3                      | PSR0100016988.mm.1  | -3,32 | 0,005396 | 0,378916 | Cassette Exon 0,21       |
| TC0100002081.mm.1 | 5,48 Bai3                      | PSR0100016972.mm.1  | -3,65 | 0,005475 | 0,379939 | Alternative 5' Donc 0,48 |
| TC0100002081.mm.1 | 5,48 Bai3                      | PSR0100016989.mm.1  | -3,72 | 0,000239 | 0,28803  | Cassette Exon 0,22       |
| TC0100002081.mm.1 | 5,48 Bai3                      | JUC0100009651.mm.1  | -3,82 | 0,002471 | 0,349135 |                          |
| TC0100002081.mm.1 | 5,48 Bai3                      | PSR0100016995.mm.1  | -4,19 | 0,000444 | 0,297771 | Cassette Exon 0,41       |
| TC0100002081.mm.1 | 5,48 Bai3                      | PSR0100016987.mm.1  | -4,25 | 0,006852 | 0,393893 | Cassette Exon 0,31       |
| TC0100002081.mm.1 | 5,48 Bai3                      | PSR0100016983.mm.1  | -4,35 | 0,002529 | 0,349501 | Cassette Exon 0,36       |
| TC0100002081.mm.1 | 5,48 Bai3                      | PSR0100016968.mm.1  | -4,54 | 0,002478 | 0,349135 | Alternative 3' Acce 0,48 |
| TC0100002081.mm.1 | 5,48 Bai3                      | JUC0100009642.mm.1  | -4,99 | 0,010892 | 0,424403 |                          |
| TC0100002081.mm.1 | 5,48 Bai3                      | PSR0100016991.mm.1  | -5,93 | 0,000352 | 0,290838 | Cassette Exon 0,28       |

|                   |                     |                    |        |          |                              |      |
|-------------------|---------------------|--------------------|--------|----------|------------------------------|------|
| TC0100002081.mm.1 | 5,48 Bai3           | PSR0100016973.mm.1 | -6,41  | 0,001482 | 0,329081 Alternative 5' Donc | 0,48 |
| TC0100002081.mm.1 | 5,48 Bai3           | PSR0100016953.mm.1 | -6,71  | 0,001791 | 0,336311 Cassette Exon       | 0,41 |
| TC0100002081.mm.1 | 5,48 Bai3           | PSR0100016967.mm.1 | -7,23  | 0,001516 | 0,330268 Cassette Exon       | 0,24 |
| TC0100002081.mm.1 | 5,48 Bai3           | PSR0100016976.mm.1 | -7,55  | 0,003378 | 0,354303 Alternative 5' Donc | 0,48 |
| TC0100002081.mm.1 | 5,48 Bai3           | PSR0100016975.mm.1 | -7,76  | 0,001428 | 0,327447 Alternative 5' Donc | 0,48 |
| TC0100002081.mm.1 | 5,48 Bai3           | PSR0100016956.mm.1 | -9,64  | 0,000335 | 0,28927 Alternative 3' Acce  | 0,46 |
| TC0100002081.mm.1 | 5,48 Bai3           | JUC0100009667.mm.1 | -10,83 | 0,001282 | 0,322289                     |      |
| TC0100002081.mm.1 | 5,48 Bai3           | JUC0100009676.mm.1 | -13,91 | 0,001732 | 0,335996                     |      |
| TC0800000619.mm.1 | 3,45 Glra3          | PSR0800004161.mm.1 | 2,15   | 0,010606 | 0,422777 Cassette Exon       | 0,05 |
| TC0800000619.mm.1 | 3,45 Glra3          | PSR0800004173.mm.1 | -2,07  | 0,012613 | 0,435987 Cassette Exon       | 0,17 |
| TC0800000619.mm.1 | 3,45 Glra3          | JUC0800002224.mm.1 | -2,33  | 0,017918 | 0,466466                     |      |
| TC0800000619.mm.1 | 3,45 Glra3          | PSR0800004159.mm.1 | -2,61  | 0,011446 | 0,427766 Alternative 3' Acce | 0,37 |
| TC0800000619.mm.1 | 3,45 Glra3          | JUC0800002233.mm.1 | -2,96  | 0,026349 | 0,50085                      |      |
| TC0800000619.mm.1 | 3,45 Glra3          | PSR0800004158.mm.1 | -3,37  | 0,021379 | 0,482 Alternative 3' Acce    | 0,37 |
| TC0800000619.mm.1 | 3,45 Glra3          | JUC0800002225.mm.1 | -5,61  | 0,004931 | 0,373093                     |      |
| TC0800000619.mm.1 | 3,45 Glra3          | PSR0800004160.mm.1 | -6,86  | 0,000596 | 0,304044 Alternative 3' Acce | 0,48 |
| TC0X00000700.mm.1 | 16,51 Opn1mw        | PSR0X00004617.mm.1 | 2,15   | 0,000347 | 0,290082 Cassette Exon       | 0,24 |
| TC0X00000700.mm.1 | 16,51 Opn1mw        | JUC0X00002338.mm.1 | -2,6   | 0,049692 | 0,563531                     |      |
| TC0X00000700.mm.1 | 16,51 Opn1mw        | PSR0X00004611.mm.1 | -3,06  | 0,005616 | 0,381191 Cassette Exon       | 0,2  |
| TC0X00000700.mm.1 | 16,51 Opn1mw        | JUC0X00002341.mm.1 | -3,52  | 0,015996 | 0,45699                      |      |
| TC0X00000700.mm.1 | 16,51 Opn1mw        | PSR0X00004620.mm.1 | -3,54  | 0,000861 | 0,311909 Alternative 5' Donc | 0,33 |
| TC0X00000700.mm.1 | 16,51 Opn1mw        | JUC0X00002342.mm.1 | -13,99 | 0,017403 | 0,463753                     |      |
| TC0X00000700.mm.1 | 16,51 Opn1mw        | PSR0X00004614.mm.1 | -17,73 | 0,005034 | 0,374447 Cassette Exon       | 0,4  |
| TC0600001664.mm.1 | 1,82 Pde3a          | JUC0600006974.mm.1 | 2,15   | 0,007714 | 0,402552                     |      |
| TC0600001664.mm.1 | 1,82 Pde3a          | PSR0600013270.mm.1 | -2,78  | 0,014434 | 0,448934 Alternative 3' Acce | 0,25 |
| TC0600001664.mm.1 | 1,82 Pde3a          | JUC0600006976.mm.1 | -3     | 0,032439 | 0,519525                     |      |
| TC0200000301.mm.1 | 1,04 Commd3         | PSR0200001328.mm.1 | 2,15   | 0,046712 | 0,556856 Alternative 3' Acce | 0,19 |
| TC0700000559.mm.1 | 1,06 Syne4          | PSR0700004823.mm.1 | 2,15   | 0,007733 | 0,402774 Alternative 3' Acce | 0,18 |
| TC0700000559.mm.1 | 1,06 Syne4          | PSR0700004846.mm.1 | -2,9   | 0,002016 | 0,34123                      |      |
| TC0700002996.mm.1 | 1,17 Ccdc155        | PSR0700027002.mm.1 | 2,15   | 0,004309 | 0,364142 Alternative 3' Acce | 0,18 |
| TC1500001742.mm.1 | 1,36 Top1mt         | PSR1500013126.mm.1 | 2,15   | 0,001118 | 0,317328 Alternative 3' Acce | 0,18 |
| TC1700002313.mm.1 | -1,37 Plin4         | PSR1700021594.mm.1 | 2,15   | 0,019551 | 0,474538 Alternative 5' Donc | 0,18 |
| TC0100003664.mm.1 | -1,27 Psen2         | PSR0100030130.mm.1 | 2,15   | 0,008173 | 0,405603 Cassette Exon       | 0,17 |
| TC0600000004.mm.1 | 1,17 Ccdc132        | PSR0600000026.mm.1 | 2,15   | 0,048605 | 0,561139 Cassette Exon       | 0,1  |
| TC0600000004.mm.1 | 1,17 Ccdc132        | PSR0600000054.mm.1 | -2,25  | 0,047967 | 0,559552 Cassette Exon       | 0,17 |
| TC1000000819.mm.1 | -1,42 Misp          | PSR1000005940.mm.1 | 2,15   | 0,022962 | 0,488776 Alternative 5' Donc | 0,16 |
| TC1000000819.mm.1 | -1,42 Misp          | JUC1000003230.mm.1 | 2,09   | 0,011651 | 0,429885                     |      |
| TC1000000819.mm.1 | -1,42 Misp          | JUC1000003229.mm.1 | 2,08   | 0,001853 | 0,337479                     |      |
| TC1000000819.mm.1 | -1,42 Misp          | PSR1000005941.mm.1 | 2,05   | 0,001799 | 0,336311 Cassette Exon       | 0,17 |
| TC1100004123.mm.1 | 1,4 Cygb            | PSR1100039077.mm.1 | 2,15   | 0,00219  | 0,344463 Cassette Exon       | 0,16 |
| TC1500001353.mm.1 | -1,22               | PSR1500010435.mm.1 | 2,15   | 0,026789 | 0,502211 Intron Retention    | 0,15 |
| TC0200005482.mm.1 | -1,39 Hypk          | PSR0200046672.mm.1 | 2,15   | 0,023228 | 0,490032 Alternative 3' Acce | 0,14 |
| TC0500002177.mm.1 | -1,03 Zfp513        | PSR0500019921.mm.1 | 2,15   | 0,026279 | 0,50053 Alternative 5' Donc  | 0,13 |
| TC0X00002211.mm.1 | -1,8 Gpc3           | PSR0X00014114.mm.1 | 2,15   | 0,020848 | 0,479521 Alternative 5' Donc | 0,13 |
| TC1700000796.mm.1 | -1,13 Olfr133       | PSR1700007773.mm.1 | 2,15   | 0,00377  | 0,357586 Cassette Exon       | 0,12 |
| TC0400003439.mm.1 | -1,34 Kcnq4         | PSR0400027928.mm.1 | 2,15   | 0,006636 | 0,392813 Cassette Exon       | 0,11 |
| TC0500002805.mm.1 | 1,46 Antxr2         | PSR0500024664.mm.1 | 2,15   | 0,043278 | 0,549286 Cassette Exon       | 0,11 |
| TC1700000050.mm.1 | -1,18 Tulp4; Gm2808 | PSR1700000348.mm.1 | 2,15   | 0,047561 | 0,558707 Alternative 3' Acce | 0,11 |

|                   |                             |                    |       |          |          |                          |
|-------------------|-----------------------------|--------------------|-------|----------|----------|--------------------------|
| TC1700000050.mm.1 | -1,18 Tulp4; Gm2808         | JUC1700000195.mm.1 | -2,8  | 0,007845 | 0,403342 |                          |
| TC0100001522.mm.1 | -1,21 Adcy10                | PSR0100012535.mm.1 | 2,15  | 0,035872 | 0,529376 | Cassette Exon 0,1        |
| TC1500000901.mm.1 | 1,72 Cntn1                  | JUC1500004126.mm.1 | 2,15  | 0,021847 | 0,484607 |                          |
| TC1500000901.mm.1 | 1,72 Cntn1                  | PSR1500007252.mm.1 | -2,36 | 0,016188 | 0,45809  | Cassette Exon 0,06       |
| TC1500000901.mm.1 | 1,72 Cntn1                  | JUC1500004108.mm.1 | -2,86 | 0,029163 | 0,509333 |                          |
| TC0200003133.mm.1 | 1,22 Nelfb                  | JUC0200013018.mm.1 | 2,15  | 0,003316 | 0,354243 |                          |
| TC1400002091.mm.1 | -1,07 Psme2; Psme2b         | JUC1400008697.mm.1 | 2,15  | 0,014075 | 0,446841 |                          |
| TC1400002091.mm.1 | -1,07 Psme2; Psme2b         | JUC1400008700.mm.1 | 2,07  | 0,038159 | 0,535786 |                          |
| TC1200000806.mm.1 | 1,05 Ptgr2                  | JUC1200003259.mm.1 | 2,15  | 0,010771 | 0,423955 |                          |
| TC1300001033.mm.1 | -1,31 Dhfr                  | JUC1300003442.mm.1 | 2,15  | 0,006932 | 0,395269 |                          |
| TC0100002608.mm.1 | -1,01 Dnpep                 | JUC0100012052.mm.1 | 2,15  | 0,027243 | 0,503642 |                          |
| TC1700000896.mm.1 | -1,14 Dnph1                 | JUC1700004577.mm.1 | 2,15  | 0,029801 | 0,511132 |                          |
| TC1900001772.mm.1 | -1,16 443040218Rik          | JUC1900006484.mm.1 | 2,15  | 0,028122 | 0,506228 |                          |
| TC0100000343.mm.1 | -1,11 Col3a1                | JUC0100001434.mm.1 | 2,15  | 0,032383 | 0,519221 |                          |
| TC0100000343.mm.1 | -1,11 Col3a1                | JUC0100001432.mm.1 | -2,53 | 0,007765 | 0,402774 |                          |
| TC1800001521.mm.1 | -1,28 Fam210a; Mir7219; mmu | JUC1800006220.mm.1 | 2,15  | 0,023581 | 0,490995 |                          |
| TC0100001947.mm.1 | -1,04 Snhg6                 | JUC0100009053.mm.1 | 2,15  | 0,024108 | 0,49322  |                          |
| TC0200000825.mm.1 | -1,27 4930573016Rik         | JUC0200003462.mm.1 | 2,15  | 0,017316 | 0,463282 |                          |
| TC1600000468.mm.1 | 1,02 Zfp148                 | JUC1600002304.mm.1 | 2,15  | 0,001528 | 0,330287 |                          |
| TC1600001256.mm.1 | -1,36 Spidr                 | JUC1600005285.mm.1 | 2,15  | 0,04148  | 0,544745 |                          |
| TC0500003716.mm.1 | 1,07 Pms2                   | JUC0500008714.mm.1 | 2,15  | 0,007119 | 0,397044 |                          |
| TC0800002463.mm.1 | -1,51 Cherp                 | JUC0800010280.mm.1 | 2,15  | 0,016414 | 0,458966 |                          |
| TC0700000218.mm.1 | -1,19 Zfp541                | JUC0700000736.mm.1 | 2,15  | 0,019411 | 0,473825 |                          |
| TC0700001822.mm.1 | 1,26 Hirip3                 | PSR0700015598.mm.1 | 2,15  | 0,001711 | 0,335996 |                          |
| TC0700001822.mm.1 | 1,26 Hirip3                 | JUC0700008176.mm.1 | -2,9  | 0,049876 | 0,563773 |                          |
| TC0700002277.mm.1 | -1,79 Vmn2r39               | JUC0700010935.mm.1 | 2,15  | 0,020594 | 0,478531 |                          |
| TC0400000348.mm.1 | -1,42                       | JUC0400001047.mm.1 | 2,15  | 0,013194 | 0,440783 |                          |
| TC1000001244.mm.1 | -1,11 Slc6a15               | JUC1000005045.mm.1 | 2,15  | 0,046942 | 0,557545 |                          |
| TC1000002519.mm.1 | -1,05 Lmnb2                 | JUC1000010324.mm.1 | 2,15  | 0,014502 | 0,449545 |                          |
| TC1100003276.mm.1 | 1,06 Pipox                  | JUC1100015792.mm.1 | 2,15  | 0,029402 | 0,509995 |                          |
| TC0300002165.mm.1 | -1,43 Zbbx                  | JUC0300008530.mm.1 | 2,15  | 0,022674 | 0,487625 |                          |
| TC0X00000981.mm.1 | 1,04 Ogt                    | JUC0X00003275.mm.1 | 2,15  | 0,012099 | 0,43255  |                          |
| TC0500000092.mm.1 | -1,17 Gm6650                | JUC0500000453.mm.1 | 2,15  | 0,02545  | 0,497549 |                          |
| TC0X00002333.mm.1 | 1,08 Slitrk4                | JUC0X00007480.mm.1 | 2,15  | 0,018395 | 0,468484 |                          |
| TC0400002638.mm.1 | -1,22 Aldob                 | JUC0400011129.mm.1 | 2,15  | 0,009627 | 0,417315 |                          |
| TC0100001262.mm.1 | 2,74 Kif21b                 | PSR0100010488.mm.1 | 2,14  | 0,003882 | 0,359196 |                          |
| TC0100001262.mm.1 | 2,74 Kif21b                 | PSR0100010504.mm.1 | -2,42 | 0,014156 | 0,447466 | Cassette Exon 0,15       |
| TC0100001262.mm.1 | 2,74 Kif21b                 | JUC0100006045.mm.1 | -2,52 | 0,002167 | 0,344341 |                          |
| TC0100001262.mm.1 | 2,74 Kif21b                 | JUC0100006056.mm.1 | -2,52 | 0,005441 | 0,379743 |                          |
| TC0100001262.mm.1 | 2,74 Kif21b                 | PSR0100010467.mm.1 | -2,54 | 0,016941 | 0,460989 | Cassette Exon 0,15       |
| TC0100001262.mm.1 | 2,74 Kif21b                 | PSR0100010496.mm.1 | -2,61 | 0,012456 | 0,43528  | Cassette Exon 0,28       |
| TC0100001262.mm.1 | 2,74 Kif21b                 | PSR0100010497.mm.1 | -2,62 | 0,003811 | 0,358103 | Cassette Exon 0,29       |
| TC0100001262.mm.1 | 2,74 Kif21b                 | PSR0100010465.mm.1 | -2,7  | 0,004827 | 0,371481 | Cassette Exon 0,15       |
| TC0100001262.mm.1 | 2,74 Kif21b                 | JUC0100006057.mm.1 | -2,74 | 0,005131 | 0,376377 |                          |
| TC0100001262.mm.1 | 2,74 Kif21b                 | PSR0100010509.mm.1 | -2,98 | 0,006557 | 0,39213  | Alternative 5' Donc 0,34 |
| TC0100001262.mm.1 | 2,74 Kif21b                 | PSR0100010477.mm.1 | -2,99 | 0,002463 | 0,349135 | Alternative 5' Donc 0,33 |
| TC0100001262.mm.1 | 2,74 Kif21b                 | PSR0100010498.mm.1 | -3,02 | 0,0068   | 0,393614 | Alternative 3' Acce 0,09 |
| TC0100001262.mm.1 | 2,74 Kif21b                 | PSR0100010499.mm.1 | -3,07 | 0,002896 | 0,352207 | Alternative 5' Donc 0,06 |

|                   |                             |                    |        |          |                              |      |
|-------------------|-----------------------------|--------------------|--------|----------|------------------------------|------|
| TC0100001262.mm.1 | 2,74 Kif21b                 | JUC0100006051.mm.1 | -3,57  | 0,020162 | 0,477086                     |      |
| TC0100001262.mm.1 | 2,74 Kif21b                 | JUC0100006064.mm.1 | -4,23  | 0,017204 | 0,462491                     |      |
| TC0100001262.mm.1 | 2,74 Kif21b                 | PSR0100010472.mm.1 | -4,38  | 0,0034   | 0,354874 Intron Retention    | 0,63 |
| TC0100001262.mm.1 | 2,74 Kif21b                 | PSR0100010474.mm.1 | -4,53  | 0,003126 | 0,353892 Intron Retention    | 0,69 |
| TC0100003587.mm.1 | 5,46 Cadm3                  | JUC0100016714.mm.1 | 2,14   | 0,002456 | 0,349135                     |      |
| TC0100003587.mm.1 | 5,46 Cadm3                  | PSR0100029413.mm.1 | -2,06  | 0,014076 | 0,446841 Cassette Exon       | 0,23 |
| TC0100003587.mm.1 | 5,46 Cadm3                  | PSR0100029423.mm.1 | -2,47  | 0,011246 | 0,426718 Alternative 5' Donc | 0,24 |
| TC0100003587.mm.1 | 5,46 Cadm3                  | PSR0100029427.mm.1 | -3,3   | 0,007317 | 0,39887 Alternative 3' Acce  | 0,37 |
| TC0100003587.mm.1 | 5,46 Cadm3                  | JUC0100016722.mm.1 | -4,27  | 0,001135 | 0,317344                     |      |
| TC0100003587.mm.1 | 5,46 Cadm3                  | PSR0100029412.mm.1 | -5,12  | 0,000813 | 0,311886 Alternative 3' Acce | 0,31 |
| TC0100003587.mm.1 | 5,46 Cadm3                  | JUC0100016725.mm.1 | -5,37  | 0,012149 | 0,432871                     |      |
| TC0100003587.mm.1 | 5,46 Cadm3                  | JUC0100016717.mm.1 | -5,38  | 0,000722 | 0,306115                     |      |
| TC0100003587.mm.1 | 5,46 Cadm3                  | JUC0100016716.mm.1 | -6,06  | 0,002118 | 0,342919                     |      |
| TC0100003587.mm.1 | 5,46 Cadm3                  | PSR0100029417.mm.1 | -7,21  | 0,00185  | 0,337414 Alternative 3' Acce | 0,48 |
| TC0100003587.mm.1 | 5,46 Cadm3                  | PSR0100029432.mm.1 | -7,67  | 0,001021 | 0,316361 Cassette Exon       | 0,51 |
| TC0100003587.mm.1 | 5,46 Cadm3                  | PSR0100029433.mm.1 | -7,91  | 0,003118 | 0,353892 Cassette Exon       | 0,37 |
| TC0100003587.mm.1 | 5,46 Cadm3                  | PSR0100029426.mm.1 | -9,72  | 0,000832 | 0,311886 Alternative 5' Donc | 0,41 |
| TC0100003587.mm.1 | 5,46 Cadm3                  | JUC0100016724.mm.1 | -14,35 | 0,003048 | 0,353892                     |      |
| TC0800001143.mm.1 | 5,21 NdrG4                  | PSR0800009013.mm.1 | 2,14   | 0,01479  | 0,450876 Cassette Exon       | 0,22 |
| TC0800001143.mm.1 | 5,21 NdrG4                  | PSR0800008995.mm.1 | -2,15  | 0,000294 | 0,288663 Cassette Exon       | 0,1  |
| TC0800001143.mm.1 | 5,21 NdrG4                  | PSR0800008990.mm.1 | -2,31  | 0,0409   | 0,543423                     |      |
| TC0800001143.mm.1 | 5,21 NdrG4                  | PSR0800008997.mm.1 | -2,57  | 0,018638 | 0,470078 Cassette Exon       | 0,15 |
| TC0800001143.mm.1 | 5,21 NdrG4                  | PSR0800009014.mm.1 | -2,68  | 0,025019 | 0,496077 Cassette Exon       | 0,29 |
| TC0800001143.mm.1 | 5,21 NdrG4                  | PSR0800008994.mm.1 | -2,88  | 0,001283 | 0,322295 Cassette Exon       | 0,17 |
| TC0800001143.mm.1 | 5,21 NdrG4                  | JUC0800004825.mm.1 | -3,06  | 0,000988 | 0,315787                     |      |
| TC0800001143.mm.1 | 5,21 NdrG4                  | JUC0800004828.mm.1 | -3,25  | 0,003152 | 0,353892                     |      |
| TC0800001143.mm.1 | 5,21 NdrG4                  | PSR0800008988.mm.1 | -3,27  | 0,020865 | 0,479521 Cassette Exon       | 0,35 |
| TC0800001143.mm.1 | 5,21 NdrG4                  | PSR0800009011.mm.1 | -3,76  | 0,008242 | 0,405976 Alternative 5' Donc | 0,36 |
| TC0800001143.mm.1 | 5,21 NdrG4                  | PSR0800008991.mm.1 | -4,14  | 0,04716  | 0,557948 Alternative 3' Acce | 0,47 |
| TC0800001143.mm.1 | 5,21 NdrG4                  | PSR0800009012.mm.1 | -4,31  | 0,007782 | 0,402902 Alternative 3' Acce | 0,48 |
| TC0800001143.mm.1 | 5,21 NdrG4                  | JUC0800004826.mm.1 | -4,65  | 0,00825  | 0,405976                     |      |
| TC0800001143.mm.1 | 5,21 NdrG4                  | JUC0800004836.mm.1 | -4,73  | 0,011179 | 0,426414                     |      |
| TC0800001143.mm.1 | 5,21 NdrG4                  | JUC0800004833.mm.1 | -5,08  | 0,00003  | 0,229631                     |      |
| TC0800001143.mm.1 | 5,21 NdrG4                  | PSR0800009018.mm.1 | -5,19  | 0,001964 | 0,340561 Alternative 5' Donc | 0,38 |
| TC0800001143.mm.1 | 5,21 NdrG4                  | PSR0800008984.mm.1 | -5,25  | 0,006636 | 0,392813 Cassette Exon       | 0,41 |
| TC0800001143.mm.1 | 5,21 NdrG4                  | PSR0800009010.mm.1 | -5,33  | 0,000406 | 0,297771 Alternative 5' Donc | 0,38 |
| TC0800001143.mm.1 | 5,21 NdrG4                  | JUC0800004838.mm.1 | -5,54  | 0,013802 | 0,445012                     |      |
| TC0800001143.mm.1 | 5,21 NdrG4                  | JUC0800004816.mm.1 | -6,06  | 0,0058   | 0,383104                     |      |
| TC0800001143.mm.1 | 5,21 NdrG4                  | JUC0800004834.mm.1 | -6,42  | 0,004237 | 0,363295                     |      |
| TC0800001143.mm.1 | 5,21 NdrG4                  | JUC0800004837.mm.1 | -6,56  | 0,000824 | 0,311886                     |      |
| TC0800001143.mm.1 | 5,21 NdrG4                  | PSR0800008986.mm.1 | -6,97  | 0,003559 | 0,356223 Cassette Exon       | 0,41 |
| TC0800001143.mm.1 | 5,21 NdrG4                  | PSR0800008985.mm.1 | -7,14  | 0,002389 | 0,348564 Cassette Exon       | 0,41 |
| TC0800001143.mm.1 | 5,21 NdrG4                  | PSR0800008983.mm.1 | -8,31  | 0,002916 | 0,352289 Cassette Exon       | 0,41 |
| TC1300002116.mm.1 | 3,66 Agtppb1; A230056J06Rik | JUC1300006995.mm.1 | 2,14   | 0,049751 | 0,563595                     |      |
| TC1300002116.mm.1 | 3,66 Agtppb1; A230056J06Rik | PSR1300013507.mm.1 | -2,34  | 0,010318 | 0,420696 Alternative 3' Acce | 0,13 |
| TC1300002116.mm.1 | 3,66 Agtppb1; A230056J06Rik | PSR1300013577.mm.1 | -2,6   | 0,047703 | 0,55896 Cassette Exon        | 0,15 |
| TC1300002116.mm.1 | 3,66 Agtppb1; A230056J06Rik | PSR1300013524.mm.1 | -2,74  | 0,028444 | 0,507234 Alternative 3' Acce | 0,33 |
| TC1300002116.mm.1 | 3,66 Agtppb1; A230056J06Rik | PSR1300013529.mm.1 | -2,83  | 0,010674 | 0,423096 Cassette Exon       | 0,24 |



|                   |       |                        |                    |        |          |          |                     |      |
|-------------------|-------|------------------------|--------------------|--------|----------|----------|---------------------|------|
| TC1300002116.mm.1 | 3,66  | Agtppb1; A230056J06Rik | PSR1300013525.mm.1 | -2,87  | 0,018628 | 0,469941 | Alternative 3' Acce | 0,33 |
| TC1300002116.mm.1 | 3,66  | Agtppb1; A230056J06Rik | PSR1300013506.mm.1 | -2,87  | 0,022464 | 0,487039 | Alternative 3' Acce | 0,13 |
| TC1300002116.mm.1 | 3,66  | Agtppb1; A230056J06Rik | JUC1300007005.mm.1 | -3,33  | 0,004233 | 0,363295 |                     |      |
| TC1300002116.mm.1 | 3,66  | Agtppb1; A230056J06Rik | PSR1300013568.mm.1 | -3,4   | 0,010803 | 0,424055 | Cassette Exon       | 0,33 |
| TC1300002116.mm.1 | 3,66  | Agtppb1; A230056J06Rik | PSR1300013513.mm.1 | -3,66  | 0,020088 | 0,4766   | Cassette Exon       | 0,06 |
| TC1300002116.mm.1 | 3,66  | Agtppb1; A230056J06Rik | JUC1300007015.mm.1 | -3,78  | 0,028109 | 0,506167 |                     |      |
| TC1300002116.mm.1 | 3,66  | Agtppb1; A230056J06Rik | PSR1300013556.mm.1 | -3,79  | 0,017811 | 0,46577  | Cassette Exon       | 0,28 |
| TC1300002116.mm.1 | 3,66  | Agtppb1; A230056J06Rik | PSR1300013567.mm.1 | -3,79  | 0,03321  | 0,522175 | Cassette Exon       | 0,24 |
| TC1300002116.mm.1 | 3,66  | Agtppb1; A230056J06Rik | PSR1300013523.mm.1 | -4,06  | 0,005868 | 0,383835 | Alternative 3' Acce | 0,33 |
| TC1300002116.mm.1 | 3,66  | Agtppb1; A230056J06Rik | PSR1300013563.mm.1 | -4,15  | 0,003866 | 0,358861 |                     |      |
| TC1300002116.mm.1 | 3,66  | Agtppb1; A230056J06Rik | PSR1300013562.mm.1 | -4,28  | 0,023576 | 0,490947 | Cassette Exon       | 0,19 |
| TC1300002116.mm.1 | 3,66  | Agtppb1; A230056J06Rik | PSR1300013566.mm.1 | -4,51  | 0,018483 | 0,46874  |                     |      |
| TC1300002116.mm.1 | 3,66  | Agtppb1; A230056J06Rik | PSR1300013536.mm.1 | -4,58  | 0,013806 | 0,445064 | Cassette Exon       | 0,42 |
| TC1300002116.mm.1 | 3,66  | Agtppb1; A230056J06Rik | PSR1300013564.mm.1 | -5,09  | 0,01358  | 0,443703 |                     |      |
| TC1300002116.mm.1 | 3,66  | Agtppb1; A230056J06Rik | PSR1300013551.mm.1 | -5,16  | 0,005059 | 0,375079 | Alternative 3' Acce | 0,46 |
| TC1300002116.mm.1 | 3,66  | Agtppb1; A230056J06Rik | JUC1300006979.mm.1 | -6,05  | 0,014164 | 0,447466 |                     |      |
| TC1300002116.mm.1 | 3,66  | Agtppb1; A230056J06Rik | JUC1300007007.mm.1 | -7,04  | 0,049059 | 0,562009 |                     |      |
| TC1300002116.mm.1 | 3,66  | Agtppb1; A230056J06Rik | JUC1300007009.mm.1 | -7,14  | 0,019219 | 0,472971 |                     |      |
| TC1300002116.mm.1 | 3,66  | Agtppb1; A230056J06Rik | JUC1300007006.mm.1 | -7,48  | 0,00253  | 0,349501 |                     |      |
| TC1300002116.mm.1 | 3,66  | Agtppb1; A230056J06Rik | JUC1300007016.mm.1 | -13,06 | 0,008106 | 0,405169 |                     |      |
| TC0700000465.mm.1 | 1,2   | Akt2                   | JUC0700001883.mm.1 | 2,14   | 0,003629 | 0,3566   |                     |      |
| TC0700000465.mm.1 | 1,2   | Akt2                   | PSR0700003750.mm.1 | -2,57  | 0,046758 | 0,556906 | Intron Retention    | 0,38 |
| TC0100002748.mm.1 | 1,38  | Pde6d                  | JUC0100012582.mm.1 | 2,14   | 0,007061 | 0,396462 |                     |      |
| TC0100002748.mm.1 | 1,38  | Pde6d                  | PSR0100022196.mm.1 | -3,33  | 0,009809 | 0,417839 | Alternative 3' Acce | 0,36 |
| TC0100003142.mm.1 | -1,24 | 5730559C18Rik          | PSR0100025566.mm.1 | 2,14   | 0,013034 | 0,439367 | Cassette Exon       | 0,2  |
| TC0200001102.mm.1 | -1,07 | Mtx2                   | PSR0200008925.mm.1 | 2,14   | 0,028723 | 0,508141 | Alternative 3' Acce | 0,18 |
| TC0900000532.mm.1 | -1,5  | Mpzl3                  | PSR0900003654.mm.1 | 2,14   | 0,025763 | 0,498442 | Alternative 3' Acce | 0,18 |
| TC0400003011.mm.1 | -1,13 | Ifna16; Gm13280        | PSR0400024333.mm.1 | 2,14   | 0,036442 | 0,530977 | Alternative 5' Donc | 0,18 |
| TC0100002810.mm.1 | -1,03 | Ndufa10                | PSR0100022760.mm.1 | 2,14   | 0,023219 | 0,490032 | Alternative 3' Acce | 0,17 |
| TC0500002615.mm.1 | -1,56 | Chic2                  | PSR0500023172.mm.1 | 2,14   | 0,020644 | 0,478859 | Cassette Exon       | 0,16 |
| TC0800001501.mm.1 | -1,06 | Cdh15                  | PSR0800012236.mm.1 | 2,14   | 0,000663 | 0,304044 | Alternative 5' Donc | 0,16 |
| TC0500001795.mm.1 | -1,13 | Rpl21; Gm15682; Gm1004 | PSR0500016615.mm.1 | 2,14   | 0,045186 | 0,55351  | Alternative 3' Acce | 0,15 |
| TC0500003529.mm.1 | 1,17  | Radil                  | PSR0500032338.mm.1 | 2,14   | 0,01694  | 0,460989 | Cassette Exon       | 0,14 |
| TC0300001953.mm.1 | 1,25  | Elf2                   | JUC0300007814.mm.1 | 2,14   | 0,015723 | 0,455416 |                     |      |
| TC0300001953.mm.1 | 1,25  | Elf2                   | PSR0300014870.mm.1 | -2,18  | 0,016268 | 0,458348 | Cassette Exon       | 0,13 |
| TC0X00000436.mm.1 | -1,13 | Rab33a                 | PSR0X00002916.mm.1 | 2,14   | 0,002538 | 0,349501 | Cassette Exon       | 0,12 |
| TC0200005402.mm.1 | 1,07  | Lama5                  | PSR0200045961.mm.1 | 2,14   | 0,030186 | 0,512365 | Cassette Exon       | 0,11 |
| TC0700004591.mm.1 | -1,48 | Tnfrsf26               | PSR0700038814.mm.1 | 2,14   | 0,001719 | 0,335996 | Cassette Exon       | 0,11 |
| TC0700004591.mm.1 | -1,48 | Tnfrsf26               | JUC0700020432.mm.1 | 2,01   | 0,008368 | 0,406435 |                     |      |
| TC1000001810.mm.1 | -1,14 | Gm4922                 | PSR1000013186.mm.1 | 2,14   | 0,008138 | 0,405362 | Cassette Exon       | 0,11 |
| TC1900000034.mm.1 | -1,66 |                        | PSR1900000483.mm.1 | 2,14   | 0,025853 | 0,498657 | Cassette Exon       | 0,11 |
| TC0100003176.mm.1 | -1,58 | 2310009B15Rik          | PSR0100025769.mm.1 | 2,14   | 0,012283 | 0,434168 | Alternative 3' Acce | 0,08 |
| TC1100001012.mm.1 | 1,34  | Camkk1                 | PSR1100009129.mm.1 | 2,14   | 0,006613 | 0,392269 | Cassette Exon       | 0,08 |
| TC0200003147.mm.1 | -1,1  | Uap1l1                 | PSR0200025976.mm.1 | 2,14   | 0,040842 | 0,543283 |                     |      |
| TC0200005146.mm.1 | 1,02  | Elmo2                  | JUC0200022678.mm.1 | 2,14   | 0,002501 | 0,349189 |                     |      |
| TC0200005146.mm.1 | 1,02  | Elmo2                  | JUC0200022686.mm.1 | -2,1   | 0,031393 | 0,516433 |                     |      |
| TC1100003928.mm.1 | -1,22 | Tex2                   | JUC1100019258.mm.1 | 2,14   | 0,015042 | 0,45215  |                     |      |
| TC1300001729.mm.1 | -1,06 | E2f3                   | JUC1300005484.mm.1 | 2,14   | 0,006275 | 0,388804 |                     |      |

|                   |                             |                    |        |          |          |                          |
|-------------------|-----------------------------|--------------------|--------|----------|----------|--------------------------|
| TC1300002301.mm.1 | -1,28 D630045M09Rik         | JUC1300007889.mm.1 | 2,14   | 0,036075 | 0,529704 |                          |
| TC1900001025.mm.1 | -1,41 Plcb3                 | JUC1900005223.mm.1 | 2,14   | 0,004391 | 0,366156 |                          |
| TC1800001160.mm.1 | -1,43 Gm26538               | JUC1800004769.mm.1 | 2,14   | 0,000467 | 0,298999 |                          |
| TC0200001411.mm.1 | -1,1 Pex16                  | JUC0200005561.mm.1 | 2,14   | 0,009669 | 0,417554 |                          |
| TC0200001411.mm.1 | -1,1 Pex16                  | JUC0200005559.mm.1 | 2,08   | 0,011677 | 0,429939 |                          |
| TC0200000495.mm.1 | 1,02 Ddx31                  | JUC0200001750.mm.1 | 2,14   | 0,026966 | 0,502831 |                          |
| TC0800000590.mm.1 | -1,31 Spata4                | JUC0800002206.mm.1 | 2,14   | 0,027486 | 0,504189 |                          |
| TC0700000420.mm.1 | 1,49 Atp5sl                 | JUC0700001634.mm.1 | 2,14   | 0,046455 | 0,556553 |                          |
| TC0700000420.mm.1 | 1,49 Atp5sl                 | JUC0700001638.mm.1 | -2,47  | 0,018117 | 0,467161 |                          |
| TC0700000420.mm.1 | 1,49 Atp5sl                 | JUC0700001636.mm.1 | -2,91  | 0,044739 | 0,552331 |                          |
| TC0700000239.mm.1 | -1,32 Prkd2                 | JUC0700000876.mm.1 | 2,14   | 0,013576 | 0,443703 |                          |
| TC0600002578.mm.1 | -1,58 Clec4f                | JUC0600010397.mm.1 | 2,14   | 0,044326 | 0,551401 |                          |
| TC0600001748.mm.1 | -1,31 Ccdc91                | JUC0600007300.mm.1 | 2,14   | 0,011734 | 0,429969 |                          |
| TC0300003249.mm.1 | -1,16 Hiat1                 | JUC0300011558.mm.1 | 2,14   | 0,017989 | 0,466929 |                          |
| TC1100000900.mm.1 | 1,05 Per1                   | JUC1100003995.mm.1 | 2,14   | 0,045233 | 0,553651 |                          |
| TC0400001246.mm.1 | 1,25 Pomgnt1; 2510003B16Rik | JUC0400004824.mm.1 | 2,14   | 0,012582 | 0,435924 |                          |
| TC1100001820.mm.1 | -1,03 Axin2                 | JUC1100008942.mm.1 | 2,14   | 0,009348 | 0,415092 |                          |
| TC0400004216.mm.1 | -1,57 Podn                  | JUC0400013388.mm.1 | 2,14   | 0,028204 | 0,506368 |                          |
| TC1000000888.mm.1 | 1,05 Zfr2                   | JUC1000003741.mm.1 | 2,14   | 0,047527 | 0,558686 |                          |
| TC0400004175.mm.1 | 26,52 Samd11                | JUC0400018306.mm.1 | 2,13   | 0,02766  | 0,504707 |                          |
| TC0400004175.mm.1 | 26,52 Samd11                | PSR0400035138.mm.1 | -2,04  | 0,039269 | 0,538976 | Cassette Exon 0,2        |
| TC0400004175.mm.1 | 26,52 Samd11                | JUC0400018303.mm.1 | -3,1   | 0,002599 | 0,349501 |                          |
| TC0400004175.mm.1 | 26,52 Samd11                | PSR0400035152.mm.1 | -3,91  | 0,01811  | 0,467161 | Alternative 5' Donc 0,46 |
| TC0400004175.mm.1 | 26,52 Samd11                | PSR0400035142.mm.1 | -5,99  | 0,008036 | 0,40434  | Intron Retention 0,62    |
| TC0400004175.mm.1 | 26,52 Samd11                | PSR0400035137.mm.1 | -6,04  | 0,000196 | 0,28803  | Alternative 3' Acce 0,31 |
| TC0400004175.mm.1 | 26,52 Samd11                | PSR0400035156.mm.1 | -13,72 | 0,003764 | 0,357586 | Alternative 5' Donc 0,42 |
| TC0100003791.mm.1 | 10,39 Prox1                 | PSR0100030972.mm.1 | 2,13   | 0,029833 | 0,511132 |                          |
| TC0100003791.mm.1 | 10,39 Prox1                 | PSR0100030977.mm.1 | -2,22  | 0,003329 | 0,354243 | Alternative 3' Acce 0,23 |
| TC0100003791.mm.1 | 10,39 Prox1                 | PSR0100030975.mm.1 | -4,39  | 0,006343 | 0,389463 | Alternative 3' Acce 0,23 |
| TC0100003791.mm.1 | 10,39 Prox1                 | PSR0100030967.mm.1 | -4,64  | 0,038286 | 0,536059 | Alternative 3' Acce 0,42 |
| TC0100003791.mm.1 | 10,39 Prox1                 | PSR0100030986.mm.1 | -5,52  | 0,011668 | 0,429939 | Cassette Exon 0,28       |
| TC0100003791.mm.1 | 10,39 Prox1                 | PSR0100030985.mm.1 | -5,68  | 0,006128 | 0,387351 | Cassette Exon 0,28       |
| TC0100003791.mm.1 | 10,39 Prox1                 | PSR0100030966.mm.1 | -6,72  | 0,021573 | 0,483165 | Alternative 3' Acce 0,42 |
| TC0100003791.mm.1 | 10,39 Prox1                 | JUC0100017585.mm.1 | -9,06  | 0,016566 | 0,459612 |                          |
| TC0100003791.mm.1 | 10,39 Prox1                 | JUC0100017580.mm.1 | -10,15 | 0,032362 | 0,519174 |                          |
| TC0100003791.mm.1 | 10,39 Prox1                 | PSR0100030984.mm.1 | -10,21 | 0,006377 | 0,389488 | Cassette Exon 0,41       |
| TC0X00000613.mm.1 | 1,38 Fmr1                   | JUC0X00001955.mm.1 | 2,13   | 0,016317 | 0,45857  |                          |
| TC0X00000613.mm.1 | 1,38 Fmr1                   | PSR0X00003863.mm.1 | -2,97  | 0,010107 | 0,418998 | Alternative 3' Acce 0,3  |
| TC0X00002453.mm.1 | -1,09 G6pdx                 | PSR0X00015677.mm.1 | 2,13   | 0,000287 | 0,28803  | Alternative 5' Donc 0,18 |
| TC0200003931.mm.1 | -1,69 Olfr1056              | PSR0200033754.mm.1 | 2,13   | 0,021491 | 0,482644 | Alternative 3' Acce 0,17 |
| TC1200002210.mm.1 | -1,59                       | PSR1200015261.mm.1 | 2,13   | 0,019315 | 0,473288 | Alternative 3' Acce 0,17 |
| TC1600001575.mm.1 | -2,5 Stfa3                  | PSR1600012853.mm.1 | 2,13   | 0,012886 | 0,438165 | Cassette Exon 0,15       |
| TC0100002576.mm.1 | -1,54 Tns1                  | PSR0100020744.mm.1 | 2,13   | 0,005771 | 0,383104 | Cassette Exon 0,14       |
| TC0100002576.mm.1 | -1,54 Tns1                  | PSR0100020739.mm.1 | 2,08   | 0,024661 | 0,494682 | Cassette Exon 0,11       |
| TC0500000623.mm.1 | 1,52 N4bp2                  | JUC0500003047.mm.1 | 2,13   | 0,040377 | 0,541959 |                          |
| TC0500000623.mm.1 | 1,52 N4bp2                  | PSR0500005523.mm.1 | -2,11  | 0,04327  | 0,54924  | Alternative 5' Donc 0,13 |
| TC0500000623.mm.1 | 1,52 N4bp2                  | JUC0500003063.mm.1 | -2,5   | 0,028683 | 0,508019 |                          |
| TC0100001779.mm.1 | 1,31 Rab3gap2               | PSR0100014787.mm.1 | 2,13   | 0,017751 | 0,465425 | Alternative 5' Donc 0,12 |

|                   |                              |                    |       |          |                              |      |
|-------------------|------------------------------|--------------------|-------|----------|------------------------------|------|
| TC0600002565.mm.1 | -1,15 Mthfd2                 | PSR0600019915.mm.1 | 2,13  | 0,016278 | 0,458372 Cassette Exon       | 0,11 |
| TC0600002565.mm.1 | -1,15 Mthfd2                 | JUC0600010337.mm.1 | -2,44 | 0,026575 | 0,501647                     |      |
| TC0800001212.mm.1 | -1,64 E2f4                   | PSR0800009534.mm.1 | 2,13  | 0,014951 | 0,451968 Cassette Exon       | 0,11 |
| TC1900000635.mm.1 | 1,06 Cutc                    | PSR1900005637.mm.1 | 2,13  | 0,005304 | 0,378059 Cassette Exon       | 0,11 |
| TC0300001081.mm.1 | -1,46 Rhoc                   | PSR0300008738.mm.1 | 2,13  | 0,024522 | 0,493992 Cassette Exon       | 0,1  |
| TC0700003760.mm.1 | -1,55 Gm15415                | PSR0700031613.mm.1 | 2,13  | 0,043287 | 0,549297 Cassette Exon       | 0,1  |
| TC0X00002187.mm.1 | -1,03 Frmd7                  | PSR0X00013985.mm.1 | 2,13  | 0,004627 | 0,369794 Cassette Exon       | 0,1  |
| TC1000003020.mm.1 | -1,47                        | PSR1000022580.mm.1 | 2,13  | 0,000493 | 0,299348 Cassette Exon       | 0,1  |
| TC1100002449.mm.1 | 1,01 Erlec1                  | PSR1100022850.mm.1 | 2,13  | 0,021318 | 0,481723 Cassette Exon       | 0,1  |
| TC1200001459.mm.1 | -1,49                        | PSR1200010179.mm.1 | 2,13  | 0,00164  | 0,333296 Cassette Exon       | 0,1  |
| TC0500001139.mm.1 | -1,49 Pole                   | PSR0500009748.mm.1 | 2,13  | 0,035669 | 0,528966 Cassette Exon       | 0,08 |
| TC0900001771.mm.1 | -1,55 Amot1                  | PSR0900014839.mm.1 | 2,13  | 0,000876 | 0,311909 Cassette Exon       | 0,05 |
| TC1400000317.mm.1 | -1,12 Itih4                  | JUC1400001541.mm.1 | 2,13  | 0,038498 | 0,536557                     |      |
| TC0200002745.mm.1 | 1,01 Gm14402                 | JUC0200011369.mm.1 | 2,13  | 0,043815 | 0,550456                     |      |
| TC0200004253.mm.1 | -1,34 Eif3m                  | JUC0200018310.mm.1 | 2,13  | 0,036716 | 0,531762                     |      |
| TC0200004253.mm.1 | -1,34 Eif3m                  | JUC0200018314.mm.1 | 2,06  | 0,008832 | 0,410293                     |      |
| TC1800000503.mm.1 | -1,11 Dmx1                   | JUC1800002046.mm.1 | 2,13  | 0,017449 | 0,463886                     |      |
| TC0100003096.mm.1 | -1,06 Atp2b4; Mir6903; mmu-r | JUC0100014175.mm.1 | 2,13  | 0,037452 | 0,533908                     |      |
| TC0100000257.mm.1 | 1,17 Vwa3b                   | JUC0100000957.mm.1 | 2,13  | 0,006377 | 0,389488                     |      |
| TC0100000257.mm.1 | 1,17 Vwa3b                   | JUC0100000980.mm.1 | -2,01 | 0,008618 | 0,408434                     |      |
| TC0100003657.mm.1 | -1,35 Tfb2m                  | JUC0100016998.mm.1 | 2,13  | 0,029692 | 0,510949                     |      |
| TC1700000584.mm.1 | -1,02 Adamts10               | JUC1700002902.mm.1 | 2,13  | 0,010836 | 0,424161                     |      |
| TC1700000584.mm.1 | -1,02 Adamts10               | JUC1700002906.mm.1 | -2,24 | 0,032969 | 0,521306                     |      |
| TC0800000148.mm.1 | -1,05 Arhgef10               | JUC0800000789.mm.1 | 2,13  | 0,005335 | 0,378059                     |      |
| TC0500000263.mm.1 | 1,03 Rbm33                   | JUC0500001118.mm.1 | 2,13  | 0,033787 | 0,523767                     |      |
| TC0500001632.mm.1 | 1,1 Sap25; Lrch4; Gm20605    | PSR0500014868.mm.1 | 2,13  | 0,04766  | 0,558824                     |      |
| TC0500001632.mm.1 | 1,1 Sap25; Lrch4; Gm20605    | JUC0500008115.mm.1 | -4,91 | 0,02062  | 0,478665                     |      |
| TC0700000387.mm.1 | -1,01 Xrcc1                  | JUC0700001383.mm.1 | 2,13  | 0,00126  | 0,322251                     |      |
| TC0700000870.mm.1 | 1,23 Nomo1                   | JUC0700003834.mm.1 | 2,13  | 0,002462 | 0,349135                     |      |
| TC0700000870.mm.1 | 1,23 Nomo1                   | JUC0700003826.mm.1 | 2,03  | 0,022431 | 0,486856                     |      |
| TC0600002799.mm.1 | 1,14 Uba3                    | JUC0600011290.mm.1 | 2,13  | 0,012207 | 0,433286                     |      |
| TC0300003080.mm.1 | -1,69 Clca4                  | JUC0300012665.mm.1 | 2,13  | 0,033017 | 0,521478                     |      |
| TC1100002897.mm.1 | -1,34 Shmt1                  | JUC1100013696.mm.1 | 2,13  | 0,014547 | 0,449564                     |      |
| TC1100002637.mm.1 | 1,1 Trim41                   | JUC1100012545.mm.1 | 2,13  | 0,006389 | 0,389608                     |      |
| TC0400004133.mm.1 | 2,22 Plch2                   | JUC0400018018.mm.1 | 2,12  | 0,001451 | 0,328414                     |      |
| TC0400004133.mm.1 | 2,22 Plch2                   | PSR0400034573.mm.1 | -2,05 | 0,010221 | 0,419955 Alternative 5' Donc | 0,22 |
| TC0400004133.mm.1 | 2,22 Plch2                   | PSR0400034592.mm.1 | -2,16 | 0,016958 | 0,4613 Cassette Exon         | 0,05 |
| TC0400004133.mm.1 | 2,22 Plch2                   | PSR0400034559.mm.1 | -2,17 | 0,013542 | 0,44358 Cassette Exon        | 0,14 |
| TC0400004133.mm.1 | 2,22 Plch2                   | JUC0400018014.mm.1 | -2,23 | 0,037046 | 0,532687                     |      |
| TC0400004133.mm.1 | 2,22 Plch2                   | JUC0400018028.mm.1 | -2,24 | 0,007046 | 0,396259                     |      |
| TC0400004133.mm.1 | 2,22 Plch2                   | PSR0400034593.mm.1 | -2,37 | 0,025265 | 0,496957 Cassette Exon       | 0,2  |
| TC0400004133.mm.1 | 2,22 Plch2                   | PSR0400034550.mm.1 | -2,41 | 0,019609 | 0,474765 Intron Retention    | 0,3  |
| TC0400004133.mm.1 | 2,22 Plch2                   | PSR0400034568.mm.1 | -2,52 | 0,016811 | 0,460623 Alternative 3' Acce | 0,25 |
| TC0400004133.mm.1 | 2,22 Plch2                   | PSR0400034594.mm.1 | -2,65 | 0,005333 | 0,378059 Cassette Exon       | 0,17 |
| TC0400004133.mm.1 | 2,22 Plch2                   | PSR0400034590.mm.1 | -2,78 | 0,001628 | 0,332831 Cassette Exon       | 0,13 |
| TC0400004133.mm.1 | 2,22 Plch2                   | JUC0400018016.mm.1 | -3,05 | 0,026045 | 0,49952                      |      |
| TC1500001881.mm.1 | 1,69 Fam227a                 | JUC1500008405.mm.1 | 2,12  | 0,023483 | 0,490673                     |      |
| TC1500001881.mm.1 | 1,69 Fam227a                 | JUC1500008400.mm.1 | -2,12 | 0,015961 | 0,456885                     |      |

|                   |                             |                    |       |          |                              |      |
|-------------------|-----------------------------|--------------------|-------|----------|------------------------------|------|
| TC1500001881.mm.1 | 1,69 Fam227a                | JUC1500008398.mm.1 | -2,16 | 0,019983 | 0,476227                     |      |
| TC1500001881.mm.1 | 1,69 Fam227a                | PSR1500014744.mm.1 | -2,21 | 0,009238 | 0,414373 Cassette Exon       | 0,28 |
| TC1500001881.mm.1 | 1,69 Fam227a                | JUC1500008415.mm.1 | -2,27 | 0,023112 | 0,489756                     |      |
| TC1500001881.mm.1 | 1,69 Fam227a                | PSR1500014754.mm.1 | -2,36 | 0,003728 | 0,357586 Cassette Exon       | 0,14 |
| TC1500001881.mm.1 | 1,69 Fam227a                | PSR1500014764.mm.1 | -2,5  | 0,000402 | 0,297771 Cassette Exon       | 0,14 |
| TC1500001881.mm.1 | 1,69 Fam227a                | JUC1500008411.mm.1 | -3,68 | 0,020199 | 0,477145                     |      |
| TC1500001881.mm.1 | 1,69 Fam227a                | JUC1500008395.mm.1 | -4,59 | 0,000734 | 0,307808                     |      |
| TC0300001300.mm.1 | -2,02 Pitx2                 | PSR0300010533.mm.1 | 2,12  | 0,008857 | 0,410455 Intron Retention    | 0,27 |
| TC0300001300.mm.1 | -2,02 Pitx2                 | PSR0300010524.mm.1 | 2,07  | 0,04758  | 0,558743 Cassette Exon       | 0,11 |
| TC0300001300.mm.1 | -2,02 Pitx2                 | PSR0300010518.mm.1 | 2,04  | 0,046121 | 0,555804 Alternative 3' Acce | 0,14 |
| TC0200002772.mm.1 | 1,47 Cdh4; Gm10711          | JUC0200011459.mm.1 | 2,12  | 0,008168 | 0,405603                     |      |
| TC0200002772.mm.1 | 1,47 Cdh4; Gm10711          | PSR0200022634.mm.1 | -2,02 | 0,016682 | 0,460085 Cassette Exon       | 0,12 |
| TC0200002772.mm.1 | 1,47 Cdh4; Gm10711          | PSR0200022612.mm.1 | -2,2  | 0,003282 | 0,354243 Cassette Exon       | 0,25 |
| TC0200002772.mm.1 | 1,47 Cdh4; Gm10711          | JUC0200011473.mm.1 | -4,06 | 0,01307  | 0,4396                       |      |
| TC0200002784.mm.1 | -1,3 Adrm1                  | PSR0200022766.mm.1 | 2,12  | 0,013503 | 0,443238 Intron Retention    | 0,23 |
| TC1500000599.mm.1 | 1,43 Adck5                  | JUC1500002493.mm.1 | 2,12  | 0,012624 | 0,436032                     |      |
| TC1500000599.mm.1 | 1,43 Adck5                  | PSR1500004324.mm.1 | -2,26 | 0,006869 | 0,394155 Alternative 3' Acce | 0,2  |
| TC0500000201.mm.1 | 1,12 Klhl7                  | PSR0500001480.mm.1 | 2,12  | 0,008762 | 0,409779 Cassette Exon       | 0,19 |
| TC0500000201.mm.1 | 1,12 Klhl7                  | JUC0500000856.mm.1 | 2,08  | 0,018958 | 0,471398                     |      |
| TC0700002366.mm.1 | -1,1 6330408A02Rik          | PSR0700021008.mm.1 | 2,12  | 0,009338 | 0,415075 Alternative 3' Acce | 0,18 |
| TC0900001759.mm.1 | -1,39 4930568E12Rik         | PSR0900014714.mm.1 | 2,12  | 0,028552 | 0,507497 Alternative 3' Acce | 0,18 |
| TC0700002979.mm.1 | 1,39 Cpt1c                  | PSR0700026691.mm.1 | 2,12  | 0,000843 | 0,311909 Cassette Exon       | 0,13 |
| TC0700002979.mm.1 | 1,39 Cpt1c                  | PSR0700026689.mm.1 | 2,11  | 0,000491 | 0,298999 Cassette Exon       | 0,16 |
| TC1100001359.mm.1 | 2,27 Srsf1                  | PSR1100012785.mm.1 | 2,12  | 0,024772 | 0,495014 Alternative 3' Acce | 0,06 |
| TC1100001359.mm.1 | 2,27 Srsf1                  | PSR1100012799.mm.1 | -2,04 | 0,029725 | 0,511057 Intron Retention    | 0,15 |
| TC0300001704.mm.1 | -2,57 Cpa3                  | PSR0300013433.mm.1 | 2,12  | 0,039425 | 0,539611 Cassette Exon       | 0,14 |
| TC1500000782.mm.1 | 1,62 Pnpla3                 | PSR1500006133.mm.1 | 2,12  | 0,026131 | 0,499897 Cassette Exon       | 0,14 |
| TC0100002544.mm.1 | -1,27 Fn1                   | PSR0100020538.mm.1 | 2,12  | 0,043127 | 0,548648 Alternative 3' Acce | 0,13 |
| TC0300001047.mm.1 | -1,17 Bcas2                 | PSR0300008448.mm.1 | 2,12  | 0,046241 | 0,556133 Cassette Exon       | 0,13 |
| TC1500000587.mm.1 | -1,08 Cyc1                  | PSR1500004080.mm.1 | 2,12  | 0,025349 | 0,497375 Intron Retention    | 0,13 |
| TC0500001466.mm.1 | -1,19 Tmem132b              | PSR0500013295.mm.1 | 2,12  | 0,036293 | 0,530447 Cassette Exon       | 0,12 |
| TC1600000765.mm.1 | -1,1 Cldn25                 | PSR1600006646.mm.1 | 2,12  | 0,036101 | 0,529729 Alternative 3' Acce | 0,12 |
| TC1600000765.mm.1 | -1,1 Cldn25                 | JUC1600003530.mm.1 | 2,05  | 0,024818 | 0,495304                     |      |
| TC1000001216.mm.1 | -1,36 Kitl                  | PSR1000009133.mm.1 | 2,12  | 0,022062 | 0,485335 Cassette Exon       | 0,11 |
| TC1400000517.mm.1 | 1,5 Ktn1                    | PSR1400004193.mm.1 | 2,12  | 0,008129 | 0,405267 Alternative 3' Acce | 0,11 |
| TC1900001415.mm.1 | -1,36 Acta2                 | PSR1900012407.mm.1 | 2,12  | 0,017894 | 0,466466 Cassette Exon       | 0,1  |
| TC0500003513.mm.1 | 2,24 Ttyh3                  | PSR0500032199.mm.1 | 2,12  | 0,02867  | 0,508006 Cassette Exon       | 0,09 |
| TC1000003019.mm.1 | -1,27 Irak3                 | JUC1000012373.mm.1 | 2,12  | 0,04658  | 0,556761                     |      |
| TC1000003019.mm.1 | -1,27 Irak3                 | PSR1000022558.mm.1 | -2,01 | 0,030118 | 0,511997 Alternative 3' Acce | 0,08 |
| TC1800000980.mm.1 | 1,16 Abhd3                  | PSR1800007277.mm.1 | 2,12  | 0,013246 | 0,441416 Cassette Exon       | 0,07 |
| TC1300002169.mm.1 | -1,08 6720489N17Rik; Zfp935 | JUC1300007233.mm.1 | 2,12  | 0,018315 | 0,468088                     |      |
| TC1500001762.mm.1 | 1,28 Puf60                  | JUC1500007602.mm.1 | 2,12  | 0,036717 | 0,531762                     |      |
| TC1900000061.mm.1 | -1,31 Catsper1              | JUC1900000401.mm.1 | 2,12  | 0,030946 | 0,514624                     |      |
| TC0100003272.mm.1 | -1,15 Lamc2                 | JUC0100015167.mm.1 | 2,12  | 0,025985 | 0,499207                     |      |
| TC1600001262.mm.1 | 1,19 Fgd4                   | JUC1600005333.mm.1 | 2,12  | 0,009761 | 0,417839                     |      |
| TC0800002515.mm.1 | -1,26 1700011L22Rik         | JUC0800010401.mm.1 | 2,12  | 0,003432 | 0,355303                     |      |
| TC0900003323.mm.1 | -1,07 C1qtnf5; Mfrp         | JUC0900001689.mm.1 | 2,12  | 0,020612 | 0,478576                     |      |
| TC1100003680.mm.1 | -1,22 Ikbz3                 | JUC1100017746.mm.1 | 2,12  | 0,019811 | 0,475266                     |      |

|                   |              |                    |        |          |                              |      |
|-------------------|--------------|--------------------|--------|----------|------------------------------|------|
| TC1700002348.mm.1 | 5,77 Tubb4a  | JUC1700011808.mm.1 | 2,11   | 0,028131 | 0,506229                     |      |
| TC1700002348.mm.1 | 5,77 Tubb4a  | PSR1700022044.mm.1 | -5,63  | 0,042234 | 0,547034 Alternative 5' Donc | 0,46 |
| TC0800002238.mm.1 | 10,85 Wdr17  | PSR0800017036.mm.1 | 2,11   | 0,019506 | 0,47452 Alternative 3' Acce  | 0,18 |
| TC0800002238.mm.1 | 10,85 Wdr17  | PSR0800017032.mm.1 | 2,08   | 0,006379 | 0,389488 Cassette Exon       | 0,11 |
| TC0800002238.mm.1 | 10,85 Wdr17  | PSR0800017054.mm.1 | -2,01  | 0,004048 | 0,361816 Cassette Exon       | 0,33 |
| TC0800002238.mm.1 | 10,85 Wdr17  | JUC0800009273.mm.1 | -2,01  | 0,0398   | 0,540753                     |      |
| TC0800002238.mm.1 | 10,85 Wdr17  | JUC0800009254.mm.1 | -2,07  | 0,044565 | 0,551921                     |      |
| TC0800002238.mm.1 | 10,85 Wdr17  | PSR0800017022.mm.1 | -2,49  | 0,010508 | 0,422115 Alternative 5' Donc | 0,16 |
| TC0800002238.mm.1 | 10,85 Wdr17  | PSR0800017058.mm.1 | -3,15  | 0,008587 | 0,40821 Cassette Exon        | 0,13 |
| TC0800002238.mm.1 | 10,85 Wdr17  | PSR0800017063.mm.1 | -3,56  | 0,016027 | 0,457132 Alternative 5' Donc | 0,1  |
| TC0800002238.mm.1 | 10,85 Wdr17  | PSR0800017005.mm.1 | -4,21  | 0,030256 | 0,512521 Alternative 3' Acce | 0,44 |
| TC0800002238.mm.1 | 10,85 Wdr17  | JUC0800009252.mm.1 | -4,33  | 0,008956 | 0,411476                     |      |
| TC0800002238.mm.1 | 10,85 Wdr17  | PSR0800017056.mm.1 | -4,35  | 0,001335 | 0,325349 Cassette Exon       | 0,07 |
| TC0800002238.mm.1 | 10,85 Wdr17  | PSR0800017025.mm.1 | -4,6   | 0,003769 | 0,357586 Cassette Exon       | 0,29 |
| TC0800002238.mm.1 | 10,85 Wdr17  | JUC0800009275.mm.1 | -4,74  | 0,00684  | 0,393893                     |      |
| TC0800002238.mm.1 | 10,85 Wdr17  | JUC0800009247.mm.1 | -4,92  | 0,00479  | 0,37131                      |      |
| TC0800002238.mm.1 | 10,85 Wdr17  | PSR0800017045.mm.1 | -5,55  | 0,026381 | 0,50105 Alternative 3' Acce  | 0,42 |
| TC0800002238.mm.1 | 10,85 Wdr17  | JUC0800009284.mm.1 | -6,62  | 0,021793 | 0,484434                     |      |
| TC0800002238.mm.1 | 10,85 Wdr17  | PSR0800017066.mm.1 | -7,1   | 0,00334  | 0,354243 Cassette Exon       | 0,41 |
| TC0800002238.mm.1 | 10,85 Wdr17  | JUC0800009279.mm.1 | -8,12  | 0,003008 | 0,353447                     |      |
| TC0800002238.mm.1 | 10,85 Wdr17  | JUC0800009291.mm.1 | -8,34  | 0,008152 | 0,40551                      |      |
| TC0800002238.mm.1 | 10,85 Wdr17  | PSR0800017024.mm.1 | -8,37  | 0,005689 | 0,382387 Cassette Exon       | 0,28 |
| TC0800002238.mm.1 | 10,85 Wdr17  | PSR0800017055.mm.1 | -8,54  | 0,001277 | 0,322251 Cassette Exon       | 0,07 |
| TC0800002238.mm.1 | 10,85 Wdr17  | PSR0800017069.mm.1 | -8,64  | 0,004562 | 0,369273 Cassette Exon       | 0,41 |
| TC0800002238.mm.1 | 10,85 Wdr17  | PSR0800017067.mm.1 | -10,25 | 0,01349  | 0,44319 Cassette Exon        | 0,41 |
| TC0800002238.mm.1 | 10,85 Wdr17  | PSR0800017064.mm.1 | -10,82 | 0,001925 | 0,34017 Cassette Exon        | 0,41 |
| TC0800002238.mm.1 | 10,85 Wdr17  | JUC0800009283.mm.1 | -11,12 | 0,004705 | 0,370888                     |      |
| TC0800002238.mm.1 | 10,85 Wdr17  | JUC0800009272.mm.1 | -12,64 | 0,000585 | 0,304044                     |      |
| TC0800002238.mm.1 | 10,85 Wdr17  | PSR0800017065.mm.1 | -13,01 | 0,003738 | 0,357586 Cassette Exon       | 0,41 |
| TC0800002238.mm.1 | 10,85 Wdr17  | JUC0800009289.mm.1 | -14,38 | 0,002895 | 0,352207                     |      |
| TC0800002238.mm.1 | 10,85 Wdr17  | PSR0800017062.mm.1 | -15,09 | 0,001114 | 0,317328 Alternative 5' Donc | 0,14 |
| TC0800002238.mm.1 | 10,85 Wdr17  | JUC0800009285.mm.1 | -16,06 | 0,008563 | 0,40821                      |      |
| TC0800002238.mm.1 | 10,85 Wdr17  | JUC0800009287.mm.1 | -16,23 | 0,003988 | 0,360652                     |      |
| TC0800002238.mm.1 | 10,85 Wdr17  | JUC0800009286.mm.1 | -19,34 | 0,000278 | 0,28803                      |      |
| TC0800002238.mm.1 | 10,85 Wdr17  | JUC0800009277.mm.1 | -35,86 | 0,000241 | 0,28803                      |      |
| TC1400002335.mm.1 | 3 Ppp3cc     | PSR1400018181.mm.1 | 2,11   | 0,041682 | 0,545356 Cassette Exon       | 0,23 |
| TC1400002335.mm.1 | 3 Ppp3cc     | PSR1400018180.mm.1 | -2,28  | 0,02691  | 0,502518 Alternative 5' Donc | 0,22 |
| TC1400002335.mm.1 | 3 Ppp3cc     | PSR1400018178.mm.1 | -2,44  | 0,002846 | 0,352207 Intron Retention    | 0,29 |
| TC1400002335.mm.1 | 3 Ppp3cc     | JUC1400010008.mm.1 | -3,33  | 0,016996 | 0,461553                     |      |
| TC1400002335.mm.1 | 3 Ppp3cc     | JUC1400010005.mm.1 | -3,75  | 0,035663 | 0,528966                     |      |
| TC0800000744.mm.1 | -1,16 Cope   | PSR0800005223.mm.1 | 2,11   | 0,030134 | 0,512017 Intron Retention    | 0,23 |
| TC0200002232.mm.1 | -1,76 Gins1  | PSR0200017585.mm.1 | 2,11   | 0,008502 | 0,407296 Alternative 3' Acce | 0,18 |
| TC0200002778.mm.1 | -1,29 Lsm14b | PSR0200022662.mm.1 | 2,11   | 0,015675 | 0,455416 Cassette Exon       | 0,18 |
| TC0200002778.mm.1 | -1,29 Lsm14b | PSR0200022661.mm.1 | 2,09   | 0,032777 | 0,520748 Cassette Exon       | 0,12 |
| TC0300000668.mm.1 | 1,02 Pet112  | PSR0300004403.mm.1 | 2,11   | 0,003241 | 0,354243 Cassette Exon       | 0,17 |
| TC0900000497.mm.1 | 1,7 Usp2     | PSR0900003270.mm.1 | 2,11   | 0,030277 | 0,512602 Alternative 3' Acce | 0,16 |
| TC0200001396.mm.1 | -1,03 Phf21a | PSR0200010953.mm.1 | 2,11   | 0,026302 | 0,500653 Cassette Exon       | 0,15 |
| TC1600002132.mm.1 | -2,15        | PSR1600016372.mm.1 | 2,11   | 0,001403 | 0,325997 Cassette Exon       | 0,14 |

|                   |                       |                    |       |          |                               |      |
|-------------------|-----------------------|--------------------|-------|----------|-------------------------------|------|
| TC0100002631.mm.1 | -1,07 Farsb           | PSR0100021416.mm.1 | 2,11  | 0,031088 | 0,515208 Cassette Exon        | 0,13 |
| TC1900000508.mm.1 | -1,13 Kif20b          | PSR1900004487.mm.1 | 2,11  | 0,000918 | 0,313363 Cassette Exon        | 0,1  |
| TC1900000508.mm.1 | -1,13 Kif20b          | JUC1900002361.mm.1 | 2,11  | 0,025408 | 0,497403                      |      |
| TC1900000508.mm.1 | -1,13 Kif20b          | PSR1900004489.mm.1 | 2,05  | 0,04292  | 0,548271 Cassette Exon        | 0,13 |
| TC1900000508.mm.1 | -1,13 Kif20b          | JUC1900002346.mm.1 | -2,65 | 0,006493 | 0,390878                      |      |
| TC1900000508.mm.1 | -1,13 Kif20b          | JUC1900002348.mm.1 | -2,76 | 0,000659 | 0,304044                      |      |
| TC0200005500.mm.1 | -1,11 Alkbh3          | PSR0200035074.mm.1 | 2,11  | 0,013315 | 0,441836 Cassette Exon        | 0,11 |
| TC0200005500.mm.1 | -1,11 Alkbh3          | PSR0200035072.mm.1 | 2,08  | 0,038715 | 0,537292 Cassette Exon        | 0,09 |
| TC0400001925.mm.1 | -1,26 Mad2l2          | PSR0400015693.mm.1 | 2,11  | 0,004413 | 0,366761 Intron Retention     | 0,11 |
| TC1200000282.mm.1 | -1,74 Sypl            | PSR1200002191.mm.1 | 2,11  | 0,043323 | 0,549316 Cassette Exon        | 0,11 |
| TC0900000050.mm.1 | 1,04 Mmp8             | PSR0900000408.mm.1 | 2,11  | 0,0429   | 0,548193 Cassette Exon        | 0,1  |
| TC1700002527.mm.1 | -1,01 Srd5a2          | PSR1700023166.mm.1 | 2,11  | 0,031709 | 0,517443 Cassette Exon        | 0,1  |
| TC1100003318.mm.1 | 1,27 Wsb1             | PSR1100030561.mm.1 | 2,11  | 0,008351 | 0,406435 Alternative 5' Donor | 0,08 |
| TC1100004000.mm.1 | -1,09 Abca9           | JUC1100019629.mm.1 | 2,11  | 0,034474 | 0,525929                      |      |
| TC1100004000.mm.1 | -1,09 Abca9           | JUC1100019658.mm.1 | -2,82 | 0,032478 | 0,519641                      |      |
| TC1100004000.mm.1 | -1,09 Abca9           | JUC1100019660.mm.1 | -3,51 | 0,00685  | 0,393893                      |      |
| TC0300001063.mm.1 | -1,19                 | JUC0300004453.mm.1 | 2,11  | 0,026225 | 0,500162                      |      |
| TC1300002725.mm.1 | 1,26 Parp8            | JUC1300009928.mm.1 | 2,11  | 0,03248  | 0,519641                      |      |
| TC1800000771.mm.1 | -1,14 Mex3c           | JUC1800003072.mm.1 | 2,11  | 0,024968 | 0,495945                      |      |
| TC1900000521.mm.1 | 1,25 Tnks2            | JUC1900002432.mm.1 | 2,11  | 0,022975 | 0,48884                       |      |
| TC0200001591.mm.1 | -1,11 Dcdc5; BC048594 | JUC0200005972.mm.1 | 2,11  | 0,015034 | 0,452111                      |      |
| TC0200002301.mm.1 | -1,05 Tpx2            | JUC0200009036.mm.1 | 2,11  | 0,022219 | 0,485896                      |      |
| TC0500002168.mm.1 | -1,09 Cgref1          | JUC0500010746.mm.1 | 2,11  | 0,021269 | 0,48159                       |      |
| TC0800001089.mm.1 | -1,83 Ogfod1          | JUC0800004486.mm.1 | 2,11  | 0,022626 | 0,487464                      |      |
| TC0800001130.mm.1 | -1 Katnb1             | JUC0800004750.mm.1 | 2,11  | 0,019778 | 0,475077                      |      |
| TC0800002184.mm.1 | -1,56 Wwc2            | JUC0800009172.mm.1 | 2,11  | 0,041814 | 0,545586                      |      |
| TC0700004599.mm.1 | 1,02 Nadsyn1          | JUC0700020493.mm.1 | 2,11  | 0,001534 | 0,330388                      |      |
| TC0800002452.mm.1 | -1,13 Cib3            | JUC0800010224.mm.1 | 2,11  | 0,020531 | 0,478295                      |      |
| TC0600002098.mm.1 | -1,16 Zc3hav1l        | JUC0600008673.mm.1 | 2,11  | 0,004306 | 0,364136                      |      |
| TC0600003296.mm.1 | -1,72                 | JUC0600013485.mm.1 | 2,11  | 0,033858 | 0,524049                      |      |
| TC0700001736.mm.1 | -1,45 Eef2k           | JUC0700007683.mm.1 | 2,11  | 0,02302  | 0,489186                      |      |
| TC0700001736.mm.1 | -1,45 Eef2k           | JUC0700007691.mm.1 | -2,17 | 0,014854 | 0,451513                      |      |
| TC0700001878.mm.1 | -1,03 Armc5           | JUC0700008606.mm.1 | 2,11  | 0,02719  | 0,50335                       |      |
| TC1000000537.mm.1 | 1,02 Micu1            | JUC1000001973.mm.1 | 2,11  | 0,033453 | 0,522793                      |      |
| TC0X00003083.mm.1 | -1,19 Col4a6          | JUC0X00009833.mm.1 | 2,11  | 0,041831 | 0,545586                      |      |
| TC0100000558.mm.1 | 2,96 Unc80            | PSR0100004524.mm.1 | 2,1   | 0,013996 | 0,446353 Cassette Exon        | 0,16 |
| TC0100000558.mm.1 | 2,96 Unc80            | JUC0100002664.mm.1 | -2,02 | 0,033166 | 0,52199                       |      |
| TC0100000558.mm.1 | 2,96 Unc80            | PSR0100004591.mm.1 | -2,03 | 0,018747 | 0,470733 Cassette Exon        | 0,17 |
| TC0100000558.mm.1 | 2,96 Unc80            | JUC0100002663.mm.1 | -2,03 | 0,04423  | 0,55119                       |      |
| TC0100000558.mm.1 | 2,96 Unc80            | PSR0100004535.mm.1 | -2,04 | 0,03232  | 0,519155 Cassette Exon        | 0,12 |
| TC0100000558.mm.1 | 2,96 Unc80            | PSR0100004558.mm.1 | -2,13 | 0,038528 | 0,536634 Cassette Exon        | 0,16 |
| TC0100000558.mm.1 | 2,96 Unc80            | JUC0100002645.mm.1 | -2,14 | 0,021467 | 0,48244                       |      |
| TC0100000558.mm.1 | 2,96 Unc80            | JUC0100002695.mm.1 | -2,27 | 0,007477 | 0,400381                      |      |
| TC0100000558.mm.1 | 2,96 Unc80            | PSR0100004586.mm.1 | -2,3  | 0,023098 | 0,489699 Cassette Exon        | 0,14 |
| TC0100000558.mm.1 | 2,96 Unc80            | PSR0100004585.mm.1 | -2,36 | 0,009602 | 0,417256 Cassette Exon        | 0,14 |
| TC0100000558.mm.1 | 2,96 Unc80            | JUC0100002655.mm.1 | -2,42 | 0,017272 | 0,462993                      |      |
| TC0100000558.mm.1 | 2,96 Unc80            | JUC0100002667.mm.1 | -2,43 | 0,029782 | 0,511132                      |      |
| TC0100000558.mm.1 | 2,96 Unc80            | PSR0100004582.mm.1 | -2,44 | 0,035537 | 0,528764 Cassette Exon        | 0,14 |

|                   |                            |                    |       |          |                              |      |
|-------------------|----------------------------|--------------------|-------|----------|------------------------------|------|
| TC0100000558.mm.1 | 2,96 Unc80                 | PSR0100004520.mm.1 | -2,45 | 0,030551 | 0,51337 Alternative 3' Acce  | 0,12 |
| TC0100000558.mm.1 | 2,96 Unc80                 | JUC0100002661.mm.1 | -2,45 | 0,00223  | 0,345773                     |      |
| TC0100000558.mm.1 | 2,96 Unc80                 | PSR0100004575.mm.1 | -2,49 | 0,04352  | 0,54998 Cassette Exon        | 0,13 |
| TC0100000558.mm.1 | 2,96 Unc80                 | PSR0100004574.mm.1 | -2,74 | 0,021774 | 0,48438 Cassette Exon        | 0,16 |
| TC0100000558.mm.1 | 2,96 Unc80                 | JUC0100002696.mm.1 | -3,02 | 0,034236 | 0,525168                     |      |
| TC0100000558.mm.1 | 2,96 Unc80                 | PSR0100004588.mm.1 | -3,04 | 0,010104 | 0,418998 Cassette Exon       | 0,2  |
| TC0100000558.mm.1 | 2,96 Unc80                 | PSR0100004573.mm.1 | -3,21 | 0,01341  | 0,442624 Cassette Exon       | 0,23 |
| TC0100000558.mm.1 | 2,96 Unc80                 | PSR0100004529.mm.1 | -3,22 | 0,008839 | 0,410293 Alternative 5' Donc | 0,28 |
| TC0300000680.mm.1 | 1,27 Lrba                  | JUC0300002335.mm.1 | 2,1   | 0,03146  | 0,516861                     |      |
| TC0300000680.mm.1 | 1,27 Lrba                  | PSR0300004522.mm.1 | -2,08 | 0,045572 | 0,554511 Intron Retention    | 0,25 |
| TC0500000363.mm.1 | 1,42 Whsc1                 | PSR0500003439.mm.1 | 2,1   | 0,042541 | 0,547908 Alternative 3' Acce | 0,17 |
| TC0500000363.mm.1 | 1,42 Whsc1                 | JUC0500001928.mm.1 | -2,75 | 0,043183 | 0,548893                     |      |
| TC0500000363.mm.1 | 1,42 Whsc1                 | JUC0500001919.mm.1 | -3,6  | 0,011676 | 0,429939                     |      |
| TC1100000780.mm.1 | -2,93 Mfap4                | PSR1100006246.mm.1 | 2,1   | 0,000801 | 0,311765 Cassette Exon       | 0,15 |
| TC0600000764.mm.1 | -1,43 Tnip3                | PSR0600005714.mm.1 | 2,1   | 0,015692 | 0,455416 Alternative 3' Acce | 0,14 |
| TC0800002188.mm.1 | 1,5 Tenm3                  | JUC0800009208.mm.1 | 2,1   | 0,031257 | 0,516001                     |      |
| TC0800002188.mm.1 | 1,5 Tenm3                  | PSR0800016901.mm.1 | -2,12 | 0,016815 | 0,460623 Alternative 5' Donc | 0,14 |
| TC1100001988.mm.1 | -1,86 C1qtnf1              | PSR1100018888.mm.1 | 2,1   | 0,01597  | 0,456885 Cassette Exon       | 0,14 |
| TC1400000267.mm.1 | -1,4 Asb14                 | PSR1400002192.mm.1 | 2,1   | 0,024595 | 0,494461 Alternative 5' Donc | 0,14 |
| TC1500002352.mm.1 | -1,24 Olfr288              | PSR1500017593.mm.1 | 2,1   | 0,030012 | 0,511709 Cassette Exon       | 0,14 |
| TC1500001683.mm.1 | 1,36 Kcnk9                 | PSR1500012669.mm.1 | 2,1   | 0,036531 | 0,531352 Alternative 3' Acce | 0,13 |
| TC1400000156.mm.1 | -1,84                      | PSR1400001193.mm.1 | 2,1   | 0,005072 | 0,375237 Cassette Exon       | 0,11 |
| TC0100001943.mm.1 | -1,03 Mybl1                | PSR0100015936.mm.1 | 2,1   | 0,032665 | 0,520431 Cassette Exon       | 0,1  |
| TC0300000172.mm.1 | 1,49 Tnik                  | PSR0300000887.mm.1 | 2,1   | 0,003576 | 0,356223 Cassette Exon       | 0,1  |
| TC0700000820.mm.1 | 1,53 Pnkp                  | PSR0700006881.mm.1 | 2,1   | 0,000759 | 0,308387 Cassette Exon       | 0,1  |
| TC0700000820.mm.1 | 1,53 Pnkp                  | JUC0700003415.mm.1 | -2,13 | 0,000113 | 0,267977                     |      |
| TC1900001547.mm.1 | -1 Dnmbp                   | PSR1900013651.mm.1 | 2,1   | 0,01637  | 0,458693 Cassette Exon       | 0,1  |
| TC1100001560.mm.1 | -1,21 Cdk12; Mir5119       | PSR1100014361.mm.1 | 2,1   | 0,034171 | 0,524988 Alternative 3' Acce | 0,09 |
| TC1100001011.mm.1 | 1,07 P2rx1                 | PSR1100009110.mm.1 | 2,1   | 0,009609 | 0,417256 Cassette Exon       | 0,06 |
| TC1900001165.mm.1 | -1,3 A330040F15Rik         | PSR1900010801.mm.1 | 2,1   | 0,00523  | 0,377401 Cassette Exon       | 0,04 |
| TC0700002738.mm.1 | -1,16 Zfp74                | PSR0700024245.mm.1 | 2,1   | 0,008036 | 0,40434 Alternative 3' Acce  | 0,03 |
| TC1200001461.mm.1 | -1,04 Greb1                | JUC1200005648.mm.1 | 2,1   | 0,043015 | 0,54841                      |      |
| TC1100003869.mm.1 | -1,5 Spata32               | JUC1100018884.mm.1 | 2,1   | 0,025115 | 0,496358                     |      |
| TC0300000880.mm.1 | -1,1 Selenbp1              | JUC0300003537.mm.1 | 2,1   | 0,005837 | 0,383458                     |      |
| TC1900000102.mm.1 | -1,5 Batf2                 | PSR1900001182.mm.1 | 2,1   | 0,041935 | 0,545823                     |      |
| TC1900000443.mm.1 | 1,12 C030046E11Rik         | JUC1900002128.mm.1 | 2,1   | 0,00701  | 0,395737                     |      |
| TC1500001207.mm.1 | -1,44 Rai14                | JUC1500005492.mm.1 | 2,1   | 0,026917 | 0,502535                     |      |
| TC1700000375.mm.1 | -1,22 Tpsg1                | JUC1700001695.mm.1 | 2,1   | 0,016624 | 0,459985                     |      |
| TC0100003371.mm.1 | -1,07 Dars2                | JUC0100015770.mm.1 | 2,1   | 0,026423 | 0,501198                     |      |
| TC0200001115.mm.1 | 1,39 Hnrnpa3; Gm24574; Gm6 | PSR0200008995.mm.1 | 2,1   | 0,049883 | 0,563773                     |      |
| TC1600000305.mm.1 | 1,36 Map3k13               | JUC1600001651.mm.1 | 2,1   | 0,024701 | 0,494838                     |      |
| TC1600001398.mm.1 | 1,05 Sst                   | JUC1600006054.mm.1 | 2,1   | 0,048318 | 0,56048                      |      |
| TC1600001130.mm.1 | -1,81 Srl                  | JUC1600004677.mm.1 | 2,1   | 0,01055  | 0,422341                     |      |
| TC0500001689.mm.1 | 1,08 Nudt1                 | JUC0500008419.mm.1 | 2,1   | 0,043455 | 0,549792                     |      |
| TC0800002390.mm.1 | 1,16 Upf1                  | JUC0800009812.mm.1 | 2,1   | 0,032064 | 0,518469                     |      |
| TC0800002390.mm.1 | 1,16 Upf1                  | JUC0800009821.mm.1 | -2,14 | 0,00112  | 0,317328                     |      |
| TC0700004282.mm.1 | 1 Eif3c                    | JUC0700018912.mm.1 | 2,1   | 0,041674 | 0,545356                     |      |
| TC0500002850.mm.1 | -1,14                      | JUC0500013672.mm.1 | 2,1   | 0,024805 | 0,495221                     |      |

|                   |                              |                    |        |          |                              |      |
|-------------------|------------------------------|--------------------|--------|----------|------------------------------|------|
| TC0800002757.mm.1 | -1,16 Slc38a7                | JUC0800011589.mm.1 | 2,1    | 0,042331 | 0,547323                     |      |
| TC0600002216.mm.1 | 1,08 Zfp777                  | JUC0600009138.mm.1 | 2,1    | 0,041172 | 0,544073                     |      |
| TC0700002426.mm.1 | 1,31 Sae1                    | JUC0700011395.mm.1 | 2,1    | 0,037866 | 0,534863                     |      |
| TC1100003755.mm.1 | -1,23 Gm12347                | JUC1100018008.mm.1 | 2,1    | 0,033407 | 0,522793                     |      |
| TC0400001253.mm.1 | -1,05 lpp                    | JUC0400004859.mm.1 | 2,1    | 0,041125 | 0,543963                     |      |
| TC1000001621.mm.1 | -1,17 Mmp19                  | JUC1000006442.mm.1 | 2,1    | 0,013012 | 0,439291                     |      |
| TC0400000613.mm.1 | -1,18 Rad23b                 | JUC0400002192.mm.1 | 2,1    | 0,018522 | 0,469138                     |      |
| TC1100002754.mm.1 | -1,39 Slc22a4                | JUC1100012961.mm.1 | 2,1    | 0,04109  | 0,543933                     |      |
| TC0300002101.mm.1 | -1,43                        | JUC0300008318.mm.1 | 2,1    | 0,045056 | 0,553098                     |      |
| TC1100001210.mm.1 | -1,15 Spaca3                 | JUC1100005988.mm.1 | 2,1    | 0,031926 | 0,518047                     |      |
| TC0900003094.mm.1 | -1,19 Fbxw26                 | JUC0900014667.mm.1 | 2,1    | 0,012036 | 0,432286                     |      |
| TC0900003115.mm.1 | -1,84 Nbeal2; Mir8107; mmu-m | PSR0900026370.mm.1 | 2,1    | 0,034662 | 0,526274                     |      |
| TC0900003115.mm.1 | -1,84 Nbeal2; Mir8107; mmu-m | JUC0900014823.mm.1 | 2,05   | 0,049499 | 0,563325                     |      |
| TC0900003115.mm.1 | -1,84 Nbeal2; Mir8107; mmu-m | JUC0900014811.mm.1 | 2,02   | 0,005876 | 0,383835                     |      |
| TC1000000854.mm.1 | -1,14 Gm15123; Gm15124       | JUC1000003537.mm.1 | 2,1    | 0,013487 | 0,443178                     |      |
| TC0400002713.mm.1 | 1,12 Epb4.1l4b               | JUC0400011389.mm.1 | 2,1    | 0,042819 | 0,548097                     |      |
| TC0300001641.mm.1 | 5,37 Fabp12                  | JUC0300006907.mm.1 | 2,09   | 0,004593 | 0,369794                     |      |
| TC0300001641.mm.1 | 5,37 Fabp12                  | JUC0300006906.mm.1 | -3,32  | 0,000744 | 0,307808                     |      |
| TC0300001641.mm.1 | 5,37 Fabp12                  | JUC0300006913.mm.1 | -3,42  | 0,047578 | 0,558743                     |      |
| TC0300001641.mm.1 | 5,37 Fabp12                  | PSR0300013055.mm.1 | -4,73  | 0,00415  | 0,3623 Cassette Exon         | 0,41 |
| TC0300001641.mm.1 | 5,37 Fabp12                  | JUC0300006911.mm.1 | -5,16  | 0,019294 | 0,473074                     |      |
| TC0300001641.mm.1 | 5,37 Fabp12                  | PSR0300013054.mm.1 | -5,58  | 0,00092  | 0,313363 Cassette Exon       | 0,38 |
| TC0300001641.mm.1 | 5,37 Fabp12                  | PSR0300013051.mm.1 | -8,38  | 0,002834 | 0,352207                     |      |
| TC0300001641.mm.1 | 5,37 Fabp12                  | JUC0300006912.mm.1 | -9,26  | 0,002099 | 0,342919                     |      |
| TC0300001641.mm.1 | 5,37 Fabp12                  | PSR0300013052.mm.1 | -9,27  | 0,005658 | 0,381922                     |      |
| TC0300001641.mm.1 | 5,37 Fabp12                  | PSR0300013053.mm.1 | -11,47 | 0,011812 | 0,430381                     |      |
| TC0300001641.mm.1 | 5,37 Fabp12                  | JUC0300006909.mm.1 | -12,9  | 0,002544 | 0,349501                     |      |
| TC0300001641.mm.1 | 5,37 Fabp12                  | JUC0300006910.mm.1 | -15,49 | 0,001797 | 0,336311                     |      |
| TC1600002060.mm.1 | 2,68 Synj1                   | JUC1600008157.mm.1 | 2,09   | 0,043576 | 0,550052                     |      |
| TC1600002060.mm.1 | 2,68 Synj1                   | JUC1600008177.mm.1 | -2,46  | 0,012035 | 0,432286                     |      |
| TC1600002060.mm.1 | 2,68 Synj1                   | JUC1600008144.mm.1 | -2,47  | 0,011511 | 0,42831                      |      |
| TC1600002060.mm.1 | 2,68 Synj1                   | PSR1600015840.mm.1 | -2,55  | 0,001141 | 0,317344 Alternative 3' Acce | 0,16 |
| TC1600002060.mm.1 | 2,68 Synj1                   | PSR1600015842.mm.1 | -2,73  | 0,012025 | 0,432286 Cassette Exon       | 0,12 |
| TC1600002060.mm.1 | 2,68 Synj1                   | PSR1600015845.mm.1 | -2,78  | 0,005635 | 0,381532 Alternative 5' Donc | 0,01 |
| TC1600002060.mm.1 | 2,68 Synj1                   | JUC1600008139.mm.1 | -2,82  | 0,037665 | 0,53431                      |      |
| TC1600002060.mm.1 | 2,68 Synj1                   | PSR1600015848.mm.1 | -2,86  | 0,003338 | 0,354243                     |      |
| TC1600002060.mm.1 | 2,68 Synj1                   | PSR1600015819.mm.1 | -2,95  | 0,046474 | 0,556596 Alternative 3' Acce | 0,32 |
| TC1600002060.mm.1 | 2,68 Synj1                   | PSR1600015807.mm.1 | -3,26  | 0,001258 | 0,322251 Cassette Exon       | 0,19 |
| TC1200001148.mm.1 | 1,61 Gm24899; Gm26945        | PSR1200008258.mm.1 | 2,09   | 0,026111 | 0,499897 Alternative 5' Donc | 0,17 |
| TC0200004816.mm.1 | -1,08 Cst3                   | PSR0200041109.mm.1 | 2,09   | 0,046116 | 0,555792 Alternative 3' Acce | 0,15 |
| TC1800000610.mm.1 | -2 ligp1                     | PSR1800004320.mm.1 | 2,09   | 0,021009 | 0,480143 Cassette Exon       | 0,15 |
| TC0X00002865.mm.1 | 1,02 Rps6ka6                 | PSR0X00018231.mm.1 | 2,09   | 0,045606 | 0,55464 Cassette Exon        | 0,14 |
| TC0200005518.mm.1 | -1,14 Znf512b                | PSR0200046564.mm.1 | 2,09   | 0,028487 | 0,50733 Alternative 3' Acce  | 0,13 |
| TC0400002609.mm.1 | -1,2 Anks6                   | PSR0400021327.mm.1 | 2,09   | 0,04335  | 0,549429 Cassette Exon       | 0,11 |
| TC0700003614.mm.1 | -1,71 Homer2                 | PSR0700030796.mm.1 | 2,09   | 0,009941 | 0,41841 Cassette Exon        | 0,11 |
| TC1100003774.mm.1 | -1,03 Klhl11                 | PSR1100034681.mm.1 | 2,09   | 0,028419 | 0,507154 Cassette Exon       | 0,11 |
| TC1800001640.mm.1 | -1,17 Setbp1                 | PSR1800011818.mm.1 | 2,09   | 0,013726 | 0,444758 Cassette Exon       | 0,11 |
| TC0400003413.mm.1 | -1,14 Gm12867                | PSR0400027621.mm.1 | 2,09   | 0,010555 | 0,422341 Cassette Exon       | 0,1  |



|                   |                                |                    |       |          |          |                     |      |
|-------------------|--------------------------------|--------------------|-------|----------|----------|---------------------|------|
| TC1300002617.mm.1 | -1,39 Ipo11; LOC100504500; Lrr | PSR1300017814.mm.1 | 2,09  | 0,03874  | 0,537362 | Cassette Exon       | 0,1  |
| TC1400000019.mm.1 | -1,07 Gm3127; Gm3685           | PSR1400000333.mm.1 | 2,09  | 0,032238 | 0,51899  | Cassette Exon       | 0,1  |
| TC0200002696.mm.1 | 1,06 Stx16                     | JUC0200011177.mm.1 | 2,09  | 0,002406 | 0,348653 |                     |      |
| TC1300000327.mm.1 | 1,17 Gm11368                   | JUC1300001004.mm.1 | 2,09  | 0,036418 | 0,530922 |                     |      |
| TC0100002449.mm.1 | -1,17 Gm11608                  | JUC0100011295.mm.1 | 2,09  | 0,031844 | 0,517896 |                     |      |
| TC1700001482.mm.1 | -1,14 Dact2                    | JUC1700007212.mm.1 | 2,09  | 0,049883 | 0,563773 |                     |      |
| TC0100000878.mm.1 | 1,05 Cops8                     | JUC0100004225.mm.1 | 2,09  | 0,020643 | 0,478859 |                     |      |
| TC1900000980.mm.1 | -1,06 Ehbp111                  | JUC1900004861.mm.1 | 2,09  | 0,00209  | 0,342919 |                     |      |
| TC1900001551.mm.1 | -1,37 Erlin1                   | JUC1900007596.mm.1 | 2,09  | 0,011039 | 0,425682 |                     |      |
| TC0200001749.mm.1 | -1,12 Ivd                      | JUC0200006495.mm.1 | 2,09  | 0,002714 | 0,349612 |                     |      |
| TC1500001300.mm.1 | 1,23 Fam105a                   | JUC1500005700.mm.1 | 2,09  | 0,018369 | 0,468484 |                     |      |
| TC1700000402.mm.1 | 1,69 Tmem8                     | JUC1700001838.mm.1 | 2,09  | 0,033337 | 0,522474 |                     |      |
| TC1700000402.mm.1 | 1,69 Tmem8                     | JUC1700001835.mm.1 | -2,08 | 0,010839 | 0,424161 |                     |      |
| TC1700000472.mm.1 | 1,08 Zfp523                    | JUC1700002207.mm.1 | 2,09  | 0,005751 | 0,383101 |                     |      |
| TC1600002181.mm.1 | 1,01 Dgcr2; Gm20518            | JUC1600005551.mm.1 | 2,09  | 0,013523 | 0,443433 |                     |      |
| TC0800001112.mm.1 | -1,52 Cpne2                    | JUC0800004618.mm.1 | 2,09  | 0,042036 | 0,546173 |                     |      |
| TC0700004522.mm.1 | -1,61 Rnh1                     | JUC0700020018.mm.1 | 2,09  | 0,039024 | 0,53816  |                     |      |
| TC0500002799.mm.1 | 1,07 Paqr3                     | JUC0500013395.mm.1 | 2,09  | 0,035966 | 0,529457 |                     |      |
| TC0800000411.mm.1 | -1,08                          | JUC0800001623.mm.1 | 2,09  | 0,021591 | 0,483253 |                     |      |
| TC0800002525.mm.1 | -1,65 Hhip                     | JUC0800010445.mm.1 | 2,09  | 0,003124 | 0,353892 |                     |      |
| TC0500003496.mm.1 | -1,11 Micall2                  | JUC0500017381.mm.1 | 2,09  | 0,000147 | 0,272178 |                     |      |
| TC0700001343.mm.1 | 1,09 Nars2                     | JUC0700005862.mm.1 | 2,09  | 0,031412 | 0,516527 |                     |      |
| TC0700002636.mm.1 | -1,34 Ceacam2                  | JUC0700012108.mm.1 | 2,09  | 0,026774 | 0,502153 |                     |      |
| TC0300003182.mm.1 | 1,02 Fpgt                      | JUC0300013097.mm.1 | 2,09  | 0,036517 | 0,531352 |                     |      |
| TC1100003349.mm.1 | -1,12                          | JUC1100016105.mm.1 | 2,09  | 0,016143 | 0,457937 |                     |      |
| TC1100001893.mm.1 | -1 Kctd2                       | JUC1100009255.mm.1 | 2,09  | 0,00707  | 0,396677 |                     |      |
| TC0900003011.mm.1 | -1,25 Parp3                    | JUC0900014035.mm.1 | 2,09  | 0,030951 | 0,514626 |                     |      |
| TC0800001232.mm.1 | 1,42 Nrn1; Edc4                | JUC0800005324.mm.1 | 2,08  | 0,021602 | 0,483387 |                     |      |
| TC0800001232.mm.1 | 1,42 Nrn1; Edc4                | PSR0800009861.mm.1 | -2,04 | 0,024339 | 0,49362  | Cassette Exon       | 0,16 |
| TC0800001232.mm.1 | 1,42 Nrn1; Edc4                | JUC0800005353.mm.1 | -2,04 | 0,002369 | 0,34829  |                     |      |
| TC0800001232.mm.1 | 1,42 Nrn1; Edc4                | JUC0800005350.mm.1 | -2,07 | 0,002942 | 0,352501 |                     |      |
| TC0800001232.mm.1 | 1,42 Nrn1; Edc4                | PSR0800009867.mm.1 | -2,25 | 0,015693 | 0,455416 | Cassette Exon       | 0,1  |
| TC0800001232.mm.1 | 1,42 Nrn1; Edc4                | PSR0800009863.mm.1 | -2,31 | 0,001732 | 0,335996 | Cassette Exon       | 0,17 |
| TC0800001232.mm.1 | 1,42 Nrn1; Edc4                | PSR0800009834.mm.1 | -3,25 | 0,045888 | 0,555077 | Intron Retention    | 0,52 |
| TC0100000526.mm.1 | -1,07 Fastkd2                  | PSR0100004267.mm.1 | 2,08  | 0,047006 | 0,557708 | Alternative 5' Donc | 0,18 |
| TC0X00000075.mm.1 | -1,24 Slc35a2                  | PSR0X00000582.mm.1 | 2,08  | 0,02485  | 0,495511 | Alternative 5' Donc | 0,18 |
| TC0100003338.mm.1 | 1,54 Brinp2                    | JUC0100015625.mm.1 | 2,08  | 0,04097  | 0,543536 |                     |      |
| TC0100003338.mm.1 | 1,54 Brinp2                    | PSR0100027332.mm.1 | 2,05  | 0,01415  | 0,447466 | Cassette Exon       | 0,15 |
| TC0400000464.mm.1 | -1,13 Melk                     | PSR0400003265.mm.1 | 2,08  | 0,037441 | 0,533839 | Cassette Exon       | 0,13 |
| TC0800001258.mm.1 | -1,12 Cirh1a                   | PSR0800010164.mm.1 | 2,08  | 0,02106  | 0,480272 | Cassette Exon       | 0,13 |
| TC1100000961.mm.1 | -1,06 Rnf167                   | PSR1100008563.mm.1 | 2,08  | 0,027348 | 0,503766 |                     |      |
| TC1100000961.mm.1 | -1,06 Rnf167                   | PSR1100008594.mm.1 | -2,12 | 0,015674 | 0,455416 | Alternative 5' Donc | 0,13 |
| TC1100001577.mm.1 | -1,41 Gsdma                    | PSR1100014632.mm.1 | 2,08  | 0,022383 | 0,486468 | Cassette Exon       | 0,13 |
| TC1100003109.mm.1 | -1,16 Spag7                    | PSR1100028713.mm.1 | 2,08  | 0,027641 | 0,504658 | Alternative 5' Donc | 0,13 |
| TC0900002204.mm.1 | 1,58 Cep164                    | JUC0900010372.mm.1 | 2,08  | 0,001943 | 0,340349 |                     |      |
| TC0900002204.mm.1 | 1,58 Cep164                    | PSR0900018371.mm.1 | -2,13 | 0,04907  | 0,562033 | Alternative 5' Donc | 0,11 |
| TC1400001896.mm.1 | 1,3 Txndc16                    | PSR1400014319.mm.1 | 2,08  | 0,030006 | 0,511659 | Cassette Exon       | 0,11 |
| TC1400001896.mm.1 | 1,3 Txndc16                    | JUC1400007843.mm.1 | -2,58 | 0,003091 | 0,353892 |                     |      |

|                   |                             |                    |       |          |                              |      |
|-------------------|-----------------------------|--------------------|-------|----------|------------------------------|------|
| TC0100003856.mm.1 | -1,37 Cr2                   | PSR0100031572.mm.1 | 2,08  | 0,009437 | 0,416101 Cassette Exon       | 0,1  |
| TC0400001266.mm.1 | -1,21 Mutyh                 | PSR0400009467.mm.1 | 2,08  | 0,049388 | 0,562923 Cassette Exon       | 0,1  |
| TC1400001900.mm.1 | 1,03 Gnpnat1                | PSR1400014363.mm.1 | 2,08  | 0,029758 | 0,511132 Cassette Exon       | 0,09 |
| TC0300002688.mm.1 | -1,11 Cept1                 | PSR0300020969.mm.1 | 2,08  | 0,000684 | 0,304511 Cassette Exon       | 0,05 |
| TC1800000103.mm.1 | -1,19 Lama3                 | JUC1800000391.mm.1 | 2,08  | 0,032176 | 0,518779                     |      |
| TC1800000103.mm.1 | -1,19 Lama3                 | JUC1800000410.mm.1 | -2,19 | 0,019369 | 0,473624                     |      |
| TC0100003155.mm.1 | -1,29 Nr5a2                 | JUC0100014586.mm.1 | 2,08  | 0,018758 | 0,470733                     |      |
| TC0100002764.mm.1 | 1,01 Ngef                   | JUC0100012642.mm.1 | 2,08  | 0,00678  | 0,393554                     |      |
| TC1900001026.mm.1 | 1,15 Fkbp2                  | JUC1900005232.mm.1 | 2,08  | 0,000895 | 0,313363                     |      |
| TC0100000387.mm.1 | -1,41 Osgepl1               | PSR0100003012.mm.1 | 2,08  | 0,028336 | 0,506831                     |      |
| TC1500000180.mm.1 | -1,15 Dnah5                 | JUC1500000809.mm.1 | 2,08  | 0,011802 | 0,430351                     |      |
| TC1500000180.mm.1 | -1,15 Dnah5                 | JUC1500000796.mm.1 | 2,03  | 0,011834 | 0,43053                      |      |
| TC1500000932.mm.1 | -1,65 Irak4                 | JUC1500004200.mm.1 | 2,08  | 0,014552 | 0,44963                      |      |
| TC0100003893.mm.1 | 1,28 Ahctf1                 | JUC0100017048.mm.1 | 2,08  | 0,004198 | 0,363134                     |      |
| TC0100003893.mm.1 | 1,28 Ahctf1                 | JUC0100017060.mm.1 | -2,12 | 0,023272 | 0,49004                      |      |
| TC1600000938.mm.1 | 1,78 Jam2                   | JUC1600003844.mm.1 | 2,08  | 0,024108 | 0,49322                      |      |
| TC1600000938.mm.1 | 1,78 Jam2                   | JUC1600003842.mm.1 | -2,18 | 0,001471 | 0,329052                     |      |
| TC0800001477.mm.1 | 1,07 Banp                   | JUC0800006551.mm.1 | 2,08  | 0,040697 | 0,542909                     |      |
| TC0900000631.mm.1 | -1,56                       | JUC0900002373.mm.1 | 2,08  | 0,003634 | 0,3566                       |      |
| TC0800002935.mm.1 | 1,1 Ddx19b                  | JUC0800012345.mm.1 | 2,08  | 0,015905 | 0,456586                     |      |
| TC0500001146.mm.1 | -1,02 Galnt9                | JUC0500005389.mm.1 | 2,08  | 0,002328 | 0,346856                     |      |
| TC0700000509.mm.1 | 1,04 Sars2                  | JUC0700002067.mm.1 | 2,08  | 0,021899 | 0,484824                     |      |
| TC0500003247.mm.1 | 1,07 Abcb9                  | JUC0500015912.mm.1 | 2,08  | 0,011261 | 0,426787                     |      |
| TC0700003983.mm.1 | 1,01 Trim3                  | JUC0700017477.mm.1 | 2,08  | 0,041506 | 0,544746                     |      |
| TC0700003403.mm.1 | -1,08 Chrna7                | JUC0700015330.mm.1 | 2,08  | 0,008517 | 0,407576                     |      |
| TC0700001769.mm.1 | 1,44 Tnrc6a                 | JUC0700007916.mm.1 | 2,08  | 0,030894 | 0,514574                     |      |
| TC0700002183.mm.1 | -1,54 Gm15510; LOC102640192 | JUC0700010606.mm.1 | 2,08  | 0,035673 | 0,528974                     |      |
| TC0700002646.mm.1 | -1,13 Cyp2s1                | JUC0700012185.mm.1 | 2,08  | 0,02556  | 0,497808                     |      |
| TC0600000201.mm.1 | -1,51 Asb15                 | JUC0600000624.mm.1 | 2,08  | 0,007089 | 0,396897                     |      |
| TC1000001307.mm.1 | -1,18 Caps2                 | JUC1000005293.mm.1 | 2,08  | 0,040154 | 0,541609                     |      |
| TC0400000869.mm.1 | -1,25 Dennd4c               | JUC0400003028.mm.1 | 2,08  | 0,039849 | 0,540922                     |      |
| TC1100002436.mm.1 | -1,38 4930505A04Rik         | JUC1100011854.mm.1 | 2,08  | 0,023012 | 0,489143                     |      |
| TC1100002473.mm.1 | -1,06 Nprl3                 | JUC1100011977.mm.1 | 2,08  | 0,016158 | 0,457969                     |      |
| TC0400001791.mm.1 | -1,03 Zbtb17                | JUC0400007841.mm.1 | 2,08  | 0,047276 | 0,558232                     |      |
| TC1000003218.mm.1 | -1,11 Atp5d                 | JUC1000003419.mm.1 | 2,08  | 0,003944 | 0,359922                     |      |
| TC1100000001.mm.1 | 1,44 Pisd-ps1               | JUC1100000001.mm.1 | 2,07  | 0,03511  | 0,527632                     |      |
| TC1100000001.mm.1 | 1,44 Pisd-ps1               | PSR1100000050.mm.1 | -2,26 | 0,011552 | 0,428841 Cassette Exon       | 0,24 |
| TC1100000001.mm.1 | 1,44 Pisd-ps1               | JUC1100000010.mm.1 | -3,3  | 0,017459 | 0,463886                     |      |
| TC0200001854.mm.1 | -2,83 AA467197; Mir147      | PSR0200014433.mm.1 | 2,07  | 0,003423 | 0,355303 Intron Retention    | 0,2  |
| TC0X00000396.mm.1 | 2,2 Xiap                    | JUC0X00001306.mm.1 | 2,07  | 0,046144 | 0,555804                     |      |
| TC0X00000396.mm.1 | 2,2 Xiap                    | JUC0X00001303.mm.1 | -2,13 | 0,036868 | 0,532257                     |      |
| TC0X00000396.mm.1 | 2,2 Xiap                    | JUC0X00001302.mm.1 | -2,39 | 0,010255 | 0,420147                     |      |
| TC0X00000396.mm.1 | 2,2 Xiap                    | JUC0X00001315.mm.1 | -2,96 | 0,038653 | 0,537102                     |      |
| TC0X00000396.mm.1 | 2,2 Xiap                    | PSR0X00002631.mm.1 | -2,99 | 0,043358 | 0,549429 Alternative 3' Acce | 0,17 |
| TC0X00000396.mm.1 | 2,2 Xiap                    | PSR0X00002626.mm.1 | -3,18 | 0,00838  | 0,4065 Alternative 3' Acce   | 0,19 |
| TC0X00000396.mm.1 | 2,2 Xiap                    | JUC0X00001313.mm.1 | -3,29 | 0,008304 | 0,406122                     |      |
| TC0600003302.mm.1 | -1,06 Lrp6                  | PSR0600025911.mm.1 | 2,07  | 0,041104 | 0,543933 Alternative 3' Acce | 0,18 |
| TC1600001136.mm.1 | 1,02 Cdip1                  | PSR1600009077.mm.1 | 2,07  | 0,012242 | 0,433659 Intron Retention    | 0,18 |

|                   |                                 |                           |       |          |                              |      |
|-------------------|---------------------------------|---------------------------|-------|----------|------------------------------|------|
| TC0600001171.mm.1 | -1,75 Chl1                      | PSR0600009007.mm.1        | 2,07  | 0,009887 | 0,418122 Alternative 3' Acce | 0,17 |
| TC1400000296.mm.1 | -1,21                           | PSR1400002387.mm.1        | 2,07  | 0,018043 | 0,467148 Alternative 3' Acce | 0,17 |
| TC1500001214.mm.1 | -1,13 Tars                      | PSR1500009773.mm.1        | 2,07  | 0,029653 | 0,510799 Alternative 3' Acce | 0,17 |
| TC0X00001014.mm.1 | -1,44                           | PSR0X00006798.mm.1        | 2,07  | 0,033718 | 0,523549 Alternative 5' Donc | 0,16 |
| TC0100000260.mm.1 | -1,07 Unc50                     | PSR0100001855.mm.1        | 2,07  | 0,000362 | 0,290942 Alternative 5' Donc | 0,14 |
| TC0X00001667.mm.1 | -1,23 Figf                      | PSR0X00010664.mm.1        | 2,07  | 0,008457 | 0,406611 Cassette Exon       | 0,14 |
| TC1700002642.mm.1 | -2,94                           | PSR1700023968.mm.1        | 2,07  | 0,001141 | 0,317344 Cassette Exon       | 0,14 |
| TC0100003725.mm.1 | 1,02 Mia3                       | PSR0100030562.mm.1        | 2,07  | 0,001519 | 0,330268 Cassette Exon       | 0,13 |
| TC1500002221.mm.1 | -1,11 Cers5                     | PSR1500018215.mm.1        | 2,07  | 0,049698 | 0,563531 Cassette Exon       | 0,13 |
| TC0100001227.mm.1 | 1,69 Cyb5r1                     | JUC0100005787.mm.1        | 2,07  | 0,029511 | 0,510139                     |      |
| TC0100001227.mm.1 | 1,69 Cyb5r1                     | PSR0100010069.mm.1        | -2,12 | 0,032946 | 0,52122 Cassette Exon        | 0,12 |
| TC0200000222.mm.1 | -1,23 Il15ra                    | PSR0200000856.mm.1        | 2,07  | 0,020951 | 0,479982 Alternative 5' Donc | 0,12 |
| TC1200000098.mm.1 | -1,36 Fam49a                    | PSR1200000959.mm.1        | 2,07  | 0,000707 | 0,306015 Cassette Exon       | 0,11 |
| TC0100003233.mm.1 | -1,27 Pla2g4a                   | PSR0100026157.mm.1        | 2,07  | 0,013079 | 0,4396 Cassette Exon         | 0,1  |
| TC0200001931.mm.1 | -1,46                           | PSR0200015165.mm.1        | 2,07  | 0,019643 | 0,474876 Cassette Exon       | 0,1  |
| TC0600000923.mm.1 | -1,29 Rtkn                      | PSR0600006958.mm.1        | 2,07  | 0,025335 | 0,497306 Cassette Exon       | 0,1  |
| TC1200000719.mm.1 | -1,05 Rad51b                    | PSR1200005136.mm.1        | 2,07  | 0,044077 | 0,550897 Cassette Exon       | 0,1  |
| TC1300000176.mm.1 | -1,53 Hist1h4j; Hist1h4m; Hist1 | PSR1300001178.mm.1        | 2,07  | 0,032193 | 0,518843 Cassette Exon       | 0,1  |
| TC1500000420.mm.1 | -1,26 Trmt12                    | PSR1500002988.mm.1        | 2,07  | 0,000137 | 0,270987 Cassette Exon       | 0,1  |
| TC0100002997.mm.1 | -1,32 Lypd1                     | PSR0100024073.mm.1        | 2,07  | 0,024713 | 0,494838 Cassette Exon       | 0,07 |
| TC1400001958.mm.1 | -1,12 Exoc5                     | JUC1400008070.mm.1        | 2,07  | 0,019996 | 0,476227                     |      |
| TC0200002801.mm.1 | -1,49 Gid8                      | JUC0200011630.mm.1        | 2,07  | 0,03484  | 0,526823                     |      |
| TC1300001242.mm.1 | -1,46 Plk2                      | JUC1300004076.mm.1        | 2,07  | 0,001407 | 0,326083                     |      |
| TC1300002211.mm.1 | -1,16 Nlrp4f                    | JUC1300007460.mm.1        | 2,07  | 0,017288 | 0,463143                     |      |
| TC1300002270.mm.1 | 1,19 Adcy2                      | JUC1300007742.mm.1        | 2,07  | 0,017434 | 0,463827                     |      |
| TC1300002270.mm.1 | 1,19 Adcy2                      | JUC1300007740.mm.1        | -2,11 | 0,01065  | 0,422925                     |      |
| TC1800000130.mm.1 | -1,12                           | JUC1800000544.mm.1        | 2,07  | 0,014062 | 0,446724                     |      |
| TC1700001747.mm.1 | -1,25 Taf11                     | JUC1700008681.mm.1        | 2,07  | 0,026551 | 0,501435                     |      |
| TC0100000431.mm.1 | -1,19 Aox2                      | JUC0100002037.mm.1        | 2,07  | 0,027405 | 0,503961                     |      |
| TC1800001072.mm.1 | 1,06 Zscan30                    | JUC1800004405.mm.1        | 2,07  | 0,004397 | 0,366253                     |      |
| TC1600000298.mm.1 | -1,57 Ephb3                     | JUC1600001555.mm.1        | 2,07  | 0,019788 | 0,475149                     |      |
| TC0200000417.mm.1 | 1,17 Abca2                      | JUC0200001122.mm.1        | 2,07  | 0,04675  | 0,556858                     |      |
| TC0200000417.mm.1 | 1,17 Abca2                      | JUC0200001123.mm.1        | -2,25 | 0,031698 | 0,517443                     |      |
| TC0500001695.mm.1 | 1,24 Lfng                       | JUC0500008451.mm.1        | 2,07  | 0,01742  | 0,463792                     |      |
| TC0500002272.mm.1 | -1 Evc                          | JUC0500011402.mm.1        | 2,07  | 0,002286 | 0,34605                      |      |
| TC0500000688.mm.1 | -1,1 Cwh43                      | JUC0500003328.mm.1        | 2,07  | 0,005321 | 0,378059                     |      |
| TC0500000212.mm.1 | -1,03 Nos3                      | JUC0500000880.mm.1        | 2,07  | 0,040093 | 0,541422                     |      |
| TC0500000212.mm.1 | -1,03 Nos3                      | JUC0500000875.mm.1        | -2,7  | 0,032874 | 0,521141                     |      |
| TC0700001052.mm.1 | -1,14                           | JUC0700004858.mm.1        | 2,07  | 0,01729  | 0,463143                     |      |
| TC1100002224.mm.1 | -1,24 Figl1                     | JUC1100011263.mm.1        | 2,07  | 0,025424 | 0,497527                     |      |
| TC0400003343.mm.1 | -1,26 Nasp                      | JUC0400013933.mm.1        | 2,07  | 0,015007 | 0,452083                     |      |
| TC0X00000058.mm.1 | -1,08 Foxp3; Ppp1r3fos; 493052  | JUC0X00000084.mm.1        | 2,07  | 0,017117 | 0,46232                      |      |
| TC0400003542.mm.1 | -1,03                           | ago-01 JUC0400015061.mm.1 | 2,07  | 0,028908 | 0,50858                      |      |
| TC0900002883.mm.1 | -1,04 Rasa2                     | JUC0900013276.mm.1        | 2,07  | 0,031871 | 0,51793                      |      |
| TC0400002527.mm.1 | -1,14 Arhgef39                  | JUC0400010657.mm.1        | 2,07  | 0,004922 | 0,373082                     |      |
| TC0100001712.mm.1 | 1,04 Lin9                       | PSR0100014210.mm.1        | 2,06  | 0,004489 | 0,367995 Cassette Exon       | 0,1  |
| TC0100001712.mm.1 | 1,04 Lin9                       | JUC0100008066.mm.1        | -2,15 | 0,010503 | 0,42211                      |      |
| TC0100001712.mm.1 | 1,04 Lin9                       | PSR0100014219.mm.1        | -2,94 | 0,02635  | 0,50085 Cassette Exon        | 0,28 |

|                   |                     |                    |       |          |          |                          |
|-------------------|---------------------|--------------------|-------|----------|----------|--------------------------|
| TC0100001712.mm.1 | 1,04 Lin9           | JUC0100008064.mm.1 | -3,66 | 0,005242 | 0,377642 |                          |
| TC0900001304.mm.1 | -1,15 5830418P13Rik | JUC0900005586.mm.1 | 2,06  | 0,039771 | 0,540537 |                          |
| TC0900001304.mm.1 | -1,15 5830418P13Rik | PSR0900010164.mm.1 | -2,27 | 0,02053  | 0,478295 | Cassette Exon 0,2        |
| TC0X00002671.mm.1 | -1 Las1l            | PSR0X00016733.mm.1 | 2,06  | 0,048437 | 0,560744 | Intron Retention 0,2     |
| TC1000001110.mm.1 | 1,12 lkbip          | PSR1000008445.mm.1 | 2,06  | 0,024043 | 0,493026 | Alternative 5' Donc 0,15 |
| TC0600000232.mm.1 | -1,5 Flnc           | JUC0600000799.mm.1 | 2,06  | 0,019427 | 0,473969 |                          |
| TC0600000232.mm.1 | -1,5 Flnc           | PSR0600001579.mm.1 | -2,25 | 0,020006 | 0,476344 | Cassette Exon 0,14       |
| TC0X00002434.mm.1 | -1,11 Idh3g         | PSR0X00015089.mm.1 | 2,06  | 0,041268 | 0,544166 | Intron Retention 0,14    |
| TC0X00002434.mm.1 | -1,11 Idh3g         | PSR0X00015101.mm.1 | 2,06  | 0,036083 | 0,529712 | Intron Retention 0,14    |
| TC1100002003.mm.1 | -1,75 Rnf213        | JUC1100010005.mm.1 | 2,06  | 0,010258 | 0,420147 |                          |
| TC1100002003.mm.1 | -1,75 Rnf213        | PSR1100019174.mm.1 | -2,37 | 0,043019 | 0,54841  | Cassette Exon 0,14       |
| TC1500000848.mm.1 | -1,38 B230214G05Rik | PSR1500006641.mm.1 | 2,06  | 0,038855 | 0,537829 | Cassette Exon 0,13       |
| TC0700002057.mm.1 | 1,98 Ap2a2          | JUC0700009712.mm.1 | 2,06  | 0,030514 | 0,51337  |                          |
| TC0700002057.mm.1 | 1,98 Ap2a2          | PSR0700018334.mm.1 | -2,02 | 0,018284 | 0,468049 | Cassette Exon 0,12       |
| TC0700002057.mm.1 | 1,98 Ap2a2          | PSR0700018333.mm.1 | -2,08 | 0,02248  | 0,48709  | Cassette Exon 0,12       |
| TC1300000596.mm.1 | 3,41 Nxn12          | PSR1300003763.mm.1 | 2,06  | 0,011317 | 0,427133 | Cassette Exon 0,11       |
| TC1300000596.mm.1 | 3,41 Nxn12          | PSR1300003762.mm.1 | -2,06 | 0,011317 | 0,427133 | Cassette Exon 0,08       |
| TC1600001194.mm.1 | 1,72 Tvp23a         | JUC1600004947.mm.1 | 2,06  | 0,015017 | 0,452101 |                          |
| TC1600001194.mm.1 | 1,72 Tvp23a         | PSR1600009508.mm.1 | -2,06 | 0,01432  | 0,448086 | Alternative 5' Donc 0,03 |
| TC1600001194.mm.1 | 1,72 Tvp23a         | PSR1600009509.mm.1 | -2,08 | 0,016885 | 0,460797 | Intron Retention 0,11    |
| TC1600001194.mm.1 | 1,72 Tvp23a         | PSR1600009496.mm.1 | -2,11 | 0,011318 | 0,427133 | Cassette Exon 0,03       |
| TC1600001194.mm.1 | 1,72 Tvp23a         | JUC1600004946.mm.1 | -2,12 | 0,009936 | 0,41841  |                          |
| TC1600001194.mm.1 | 1,72 Tvp23a         | PSR1600009507.mm.1 | -2,27 | 0,017384 | 0,463704 | Alternative 5' Donc 0,03 |
| TC1600001194.mm.1 | 1,72 Tvp23a         | JUC1600004954.mm.1 | -2,34 | 0,015848 | 0,456345 |                          |
| TC1600001194.mm.1 | 1,72 Tvp23a         | JUC1600004956.mm.1 | -3,16 | 0,035319 | 0,528381 |                          |
| TC1600001194.mm.1 | 1,72 Tvp23a         | JUC1600004951.mm.1 | -3,51 | 0,022786 | 0,488142 |                          |
| TC1600001194.mm.1 | 1,72 Tvp23a         | JUC1600004957.mm.1 | -5,08 | 0,022733 | 0,487829 |                          |
| TC0700000808.mm.1 | -1,22 Fam71e1       | PSR0700006711.mm.1 | 2,06  | 0,010962 | 0,425117 | Cassette Exon 0,1        |
| TC0700000983.mm.1 | 1,31 BC046251       | PSR0700008996.mm.1 | 2,06  | 0,015106 | 0,452457 | Cassette Exon 0,1        |
| TC0700000983.mm.1 | 1,31 BC046251       | JUC0700004593.mm.1 | -2,49 | 0,028905 | 0,50858  |                          |
| TC0900003241.mm.1 | -1,25 Myd88         | PSR0900027283.mm.1 | 2,06  | 0,012468 | 0,435315 | Alternative 5' Donc 0,1  |
| TC1200002025.mm.1 | 1,16 Med6           | PSR1200013964.mm.1 | 2,06  | 0,000878 | 0,311909 | Cassette Exon 0,1        |
| TC1300000637.mm.1 | -1 Eif4e1b          | PSR1300004119.mm.1 | 2,06  | 0,035222 | 0,528366 | Cassette Exon 0,1        |
| TC1500001403.mm.1 | 1,25 Ubr5           | PSR1500010915.mm.1 | 2,06  | 0,029018 | 0,508842 | Cassette Exon 0,1        |
| TC1900000900.mm.1 | -1,83               | PSR1900007806.mm.1 | 2,06  | 0,037475 | 0,533968 | Cassette Exon 0,07       |
| TC1400001471.mm.1 | 1,12 Psmd6          | JUC1400005964.mm.1 | 2,06  | 0,011122 | 0,426    |                          |
| TC1400000813.mm.1 | 1,5 Zmym2           | JUC1400003604.mm.1 | 2,06  | 0,01142  | 0,427656 |                          |
| TC0300000264.mm.1 | -1,11 Acad9         | JUC0300000882.mm.1 | 2,06  | 0,00476  | 0,371039 |                          |
| TC0200004419.mm.1 | -1,1 A430105I19Rik  | JUC0200018890.mm.1 | 2,06  | 0,03524  | 0,52837  |                          |
| TC1300002184.mm.1 | -1,08 Fancc         | JUC1300007283.mm.1 | 2,06  | 0,037342 | 0,533573 |                          |
| TC1300002249.mm.1 | -1,2 Zfp874a        | JUC1300007648.mm.1 | 2,06  | 0,048329 | 0,560488 |                          |
| TC1300002249.mm.1 | -1,2 Zfp874a        | JUC1300007649.mm.1 | -4,06 | 0,00548  | 0,379939 |                          |
| TC1300000045.mm.1 | -1,37 Idi1          | JUC1300000159.mm.1 | 2,06  | 0,046779 | 0,557017 |                          |
| TC0100000846.mm.1 | -1,24 Trpm8         | JUC0100004131.mm.1 | 2,06  | 0,034999 | 0,527405 |                          |
| TC0100000846.mm.1 | -1,24 Trpm8         | JUC0100004135.mm.1 | -2,07 | 0,001401 | 0,325997 |                          |
| TC1900001498.mm.1 | -1,54 Blnk          | JUC1900007214.mm.1 | 2,06  | 0,02911  | 0,509179 |                          |
| TC0100000999.mm.1 | 1,08 Cdh20          | JUC0100004788.mm.1 | 2,06  | 0,02969  | 0,510949 |                          |
| TC0100000351.mm.1 | 1 Wdr75             | JUC0100001489.mm.1 | 2,06  | 0,039123 | 0,538475 |                          |

|                   |                             |                    |        |          |                              |      |
|-------------------|-----------------------------|--------------------|--------|----------|------------------------------|------|
| TC0100000497.mm.1 | -1,24 Pard3b                | JUC0100002386.mm.1 | 2,06   | 0,001048 | 0,316361                     |      |
| TC1900000543.mm.1 | -1,36 Cep55                 | JUC1900002570.mm.1 | 2,06   | 0,013062 | 0,439579                     |      |
| TC0200001355.mm.1 | -1,2 Agbl2                  | JUC0200005187.mm.1 | 2,06   | 0,010751 | 0,423812                     |      |
| TC1500002067.mm.1 | -1,65 Cpne8                 | JUC1500009486.mm.1 | 2,06   | 0,001697 | 0,335395                     |      |
| TC1500001089.mm.1 | 1,36 Igfbp6                 | JUC1500004917.mm.1 | 2,06   | 0,037276 | 0,533572                     |      |
| TC0200001133.mm.1 | -1,32 Dfnb59                | JUC0200004662.mm.1 | 2,06   | 0,031745 | 0,517489                     |      |
| TC1600000746.mm.1 | -1,69 Abi3bp                | JUC1600003445.mm.1 | 2,06   | 0,022282 | 0,486046                     |      |
| TC0800001748.mm.1 | -1,06 Tdrp                  | JUC0800007714.mm.1 | 2,06   | 0,039724 | 0,540494                     |      |
| TC0900000892.mm.1 | 1,57 Rora                   | PSR0900006979.mm.1 | 2,06   | 0,023142 | 0,489776                     |      |
| TC0900000970.mm.1 | -1,23 Rfx7                  | PSR0900007479.mm.1 | 2,06   | 0,018727 | 0,470733                     |      |
| TC0900000117.mm.1 | -1,4 Taf1d; Mir7650; Gm2579 | PSR0900000849.mm.1 | 2,06   | 0,006532 | 0,391754                     |      |
| TC0900000117.mm.1 | -1,4 Taf1d; Mir7650; Gm2579 | PSR0900000843.mm.1 | -55,38 | 0,00999  | 0,418456                     |      |
| TC0700000872.mm.1 | -1,07 Otog                  | JUC0700003901.mm.1 | 2,06   | 0,016842 | 0,460749                     |      |
| TC0600003396.mm.1 | -1,35 1700060C16Rik         | JUC0600014035.mm.1 | 2,06   | 0,008609 | 0,408415                     |      |
| TC0500003741.mm.1 | 1,07 Gpc2                   | JUC0500017267.mm.1 | 2,06   | 0,000045 | 0,24627                      |      |
| TC0300002932.mm.1 | -1,03 Egf                   | JUC0300012107.mm.1 | 2,06   | 0,018571 | 0,469618                     |      |
| TC0300002056.mm.1 | -1,43 Igsf10                | JUC0300008139.mm.1 | 2,06   | 0,044204 | 0,551186                     |      |
| TC1100002092.mm.1 | -1,32 Smtn                  | JUC1100010616.mm.1 | 2,06   | 0,044823 | 0,552553                     |      |
| TC0400003549.mm.1 | 1,31 Ncdn                   | JUC0400015101.mm.1 | 2,06   | 0,017476 | 0,463933                     |      |
| TC0X00001178.mm.1 | -1,02 Pcdh11x               | PSR0X00007526.mm.1 | 2,06   | 0,012396 | 0,434939                     |      |
| TC0X00001178.mm.1 | -1,02 Pcdh11x               | JUC0X00003691.mm.1 | -3,59  | 0,017226 | 0,462633                     |      |
| TC0900002369.mm.1 | 3,82 Scamp5                 | JUC0900011197.mm.1 | 2,06   | 0,015862 | 0,456449                     |      |
| TC0900002369.mm.1 | 3,82 Scamp5                 | JUC0900011195.mm.1 | -2,01  | 0,005527 | 0,380518                     |      |
| TC0900002369.mm.1 | 3,82 Scamp5                 | JUC0900011200.mm.1 | -2,36  | 0,027626 | 0,504621                     |      |
| TC0900002369.mm.1 | 3,82 Scamp5                 | PSR0900019852.mm.1 | -3,31  | 0,022239 | 0,485896                     |      |
| TC1000000794.mm.1 | -1,05 Slc1a6                | JUC1000003140.mm.1 | 2,06   | 0,03883  | 0,537696                     |      |
| TC0500002623.mm.1 | 2,13 Kdr                    | JUC0500012623.mm.1 | 2,05   | 0,038179 | 0,535805                     |      |
| TC0500002623.mm.1 | 2,13 Kdr                    | JUC0500012621.mm.1 | -2,19  | 0,007078 | 0,396891                     |      |
| TC0500002623.mm.1 | 2,13 Kdr                    | PSR0500023224.mm.1 | -4,48  | 0,010988 | 0,425397 Alternative 5' Donc | 0,47 |
| TC1100000417.mm.1 | 2 Gabrb2                    | PSR1100003267.mm.1 | 2,05   | 0,024172 | 0,49329 Alternative 5' Donc  | 0,08 |
| TC1100000417.mm.1 | 2 Gabrb2                    | JUC1100001713.mm.1 | -2,96  | 0,028597 | 0,507685                     |      |
| TC1100000417.mm.1 | 2 Gabrb2                    | PSR1100003255.mm.1 | -3,2   | 0,00749  | 0,400686 Alternative 5' Donc | 0,29 |
| TC0300002122.mm.1 | 1,52 Ift80                  | PSR0300016009.mm.1 | 2,05   | 0,039778 | 0,540568 Cassette Exon       | 0,09 |
| TC0300002122.mm.1 | 1,52 Ift80                  | PSR0300016020.mm.1 | -2,56  | 0,0087   | 0,409002 Cassette Exon       | 0,16 |
| TC0300002122.mm.1 | 1,52 Ift80                  | PSR0300016035.mm.1 | -3,94  | 0,036655 | 0,531675 Intron Retention    | 0,27 |
| TC0400002789.mm.1 | 1,99 Wdr31                  | PSR0400022882.mm.1 | 2,05   | 0,007304 | 0,398847 Cassette Exon       | 0,1  |
| TC0400002789.mm.1 | 1,99 Wdr31                  | PSR0400022887.mm.1 | -2,14  | 0,006982 | 0,395722 Alternative 5' Donc | 0,14 |
| TC0400002789.mm.1 | 1,99 Wdr31                  | PSR0400022891.mm.1 | -2,15  | 0,039573 | 0,539809 Alternative 3' Acce | 0,17 |
| TC0400002789.mm.1 | 1,99 Wdr31                  | PSR0400022895.mm.1 | -2,36  | 0,015179 | 0,452699 Alternative 3' Acce | 0,27 |
| TC0400002789.mm.1 | 1,99 Wdr31                  | PSR0400022897.mm.1 | -2,49  | 0,010815 | 0,424055 Alternative 3' Acce | 0,27 |
| TC0400002789.mm.1 | 1,99 Wdr31                  | PSR0400022894.mm.1 | -2,61  | 0,010356 | 0,421055 Alternative 5' Donc | 0,23 |
| TC0400002789.mm.1 | 1,99 Wdr31                  | JUC0400011915.mm.1 | -2,72  | 0,011256 | 0,426718                     |      |
| TC0400002789.mm.1 | 1,99 Wdr31                  | JUC0400011914.mm.1 | -3,04  | 0,013803 | 0,445022                     |      |
| TC0400002789.mm.1 | 1,99 Wdr31                  | JUC0400011912.mm.1 | -3,58  | 0,037498 | 0,533968                     |      |
| TC1800001000.mm.1 | 1,21 Osbpl1a                | PSR1800007445.mm.1 | 2,05   | 0,04889  | 0,561732 Intron Retention    | 0,26 |
| TC1000000853.mm.1 | 2,3 Plk5                    | PSR1000006517.mm.1 | 2,05   | 0,000318 | 0,288663 Cassette Exon       | 0,08 |
| TC1000000853.mm.1 | 2,3 Plk5                    | JUC1000003522.mm.1 | -2,14  | 0,016678 | 0,460085                     |      |
| TC1000000853.mm.1 | 2,3 Plk5                    | PSR1000006522.mm.1 | -2,15  | 0,004593 | 0,369794 Intron Retention    | 0,25 |

|                   |                     |                    |       |          |                              |      |
|-------------------|---------------------|--------------------|-------|----------|------------------------------|------|
| TC1600000461.mm.1 | 1,44 Lmln           | PSR1600004368.mm.1 | 2,05  | 0,009191 | 0,413763 Cassette Exon       | 0,13 |
| TC1600000461.mm.1 | 1,44 Lmln           | PSR1600004380.mm.1 | -2,53 | 0,006345 | 0,389463 Alternative 5' Donc | 0,21 |
| TC1100001439.mm.1 | -1,39 Chad          | PSR1100013357.mm.1 | 2,05  | 0,010276 | 0,420305 Alternative 3' Acce | 0,17 |
| TC1100001439.mm.1 | -1,39 Chad          | JUC1100006994.mm.1 | -2,25 | 0,021174 | 0,480978                     |      |
| TC1100001439.mm.1 | -1,39 Chad          | JUC1100006992.mm.1 | -3,01 | 0,049058 | 0,562009                     |      |
| TC1600001395.mm.1 | -1,32 Masp1         | PSR1600011620.mm.1 | 2,05  | 0,010921 | 0,424705 Alternative 3' Acce | 0,17 |
| TC1600001395.mm.1 | -1,32 Masp1         | PSR1600011617.mm.1 | -2,26 | 0,008273 | 0,405976 Cassette Exon       | 0,12 |
| TC0200004791.mm.1 | 1 Nkx2-2            | PSR0200040975.mm.1 | 2,05  | 0,011455 | 0,42789 Alternative 5' Donc  | 0,16 |
| TC0300000095.mm.1 | -3,19 Car3          | PSR0300000415.mm.1 | 2,05  | 0,013367 | 0,442169 Alternative 3' Acce | 0,16 |
| TC0500001865.mm.1 | -1,04 Brca2         | PSR0500017196.mm.1 | 2,05  | 0,008791 | 0,409822 Alternative 3' Acce | 0,16 |
| TC0X00001639.mm.1 | -1,21 Rai2          | PSR0X00010475.mm.1 | 2,05  | 0,026935 | 0,50263 Alternative 3' Acce  | 0,15 |
| TC1900001278.mm.1 | -1,59 Pip5k1b       | PSR1900011552.mm.1 | 2,05  | 0,028872 | 0,508574 Alternative 5' Donc | 0,15 |
| TC0700000883.mm.1 | -1,68 Gm9999        | PSR0700007956.mm.1 | 2,05  | 0,000043 | 0,24627 Alternative 3' Acce  | 0,13 |
| TC0700001581.mm.1 | -1,35 Ppfbp2        | PSR0700013235.mm.1 | 2,05  | 0,007686 | 0,402552 Cassette Exon       | 0,13 |
| TC0700004617.mm.1 | -1 Adck4            | PSR0700003578.mm.1 | 2,05  | 0,036391 | 0,530857 Cassette Exon       | 0,12 |
| TC0900000285.mm.1 | 1,03 Arhgap32       | PSR0900002194.mm.1 | 2,05  | 0,021091 | 0,480371 Cassette Exon       | 0,11 |
| TC0100000039.mm.1 | -1,73 Adhfe1        | PSR0100000294.mm.1 | 2,05  | 0,001015 | 0,316361 Alternative 3' Acce | 0,1  |
| TC0200002045.mm.1 | -1,11 Gm14102       | PSR0200016301.mm.1 | 2,05  | 0,013902 | 0,445922 Cassette Exon       | 0,09 |
| TC0200002045.mm.1 | -1,11 Gm14102       | PSR0200016300.mm.1 | -2,05 | 0,013902 | 0,445922 Cassette Exon       | 0,1  |
| TC0400001222.mm.1 | -1,68 Gm12836       | PSR0400008921.mm.1 | 2,05  | 0,037117 | 0,532942 Cassette Exon       | 0,1  |
| TC0400004069.mm.1 | -1,41 1700045H11Rik | PSR0400033812.mm.1 | 2,05  | 0,021712 | 0,484104 Cassette Exon       | 0,1  |
| TC0400000644.mm.1 | -1,2 Musk           | PSR0400004578.mm.1 | 2,05  | 0,018151 | 0,467399 Cassette Exon       | 0,09 |
| TC0400000644.mm.1 | -1,2 Musk           | JUC0400002253.mm.1 | -2,07 | 0,049429 | 0,563094                     |      |
| TC0400000644.mm.1 | -1,2 Musk           | JUC0400002257.mm.1 | -2,27 | 0,034244 | 0,525168                     |      |
| TC0700004483.mm.1 | -1,02 9330101J02Rik | PSR0700037603.mm.1 | 2,05  | 0,017344 | 0,46353 Cassette Exon        | 0,09 |
| TC0800000011.mm.1 | 1,13 Pnpla6         | JUC0800000088.mm.1 | 2,05  | 0,033875 | 0,524132                     |      |
| TC0800000011.mm.1 | 1,13 Pnpla6         | PSR0800000157.mm.1 | -2,01 | 0,027342 | 0,503766 Cassette Exon       | 0,09 |
| TC0X00002794.mm.1 | -1,04 C77370        | PSR0X00017628.mm.1 | 2,05  | 0,007743 | 0,402774 Cassette Exon       | 0,09 |
| TC1900001414.mm.1 | -1,4 Ankrd22        | PSR1900012389.mm.1 | 2,05  | 0,031517 | 0,516965 Cassette Exon       | 0,07 |
| TC1900001414.mm.1 | -1,4 Ankrd22        | PSR1900012390.mm.1 | 2,05  | 0,031517 | 0,516965 Cassette Exon       | 0,07 |
| TC1400000782.mm.1 | 1,18 Dcaf11         | PSR1400006203.mm.1 | 2,05  | 0,013497 | 0,443238                     |      |
| TC0200003232.mm.1 | -1,09 Cel           | JUC0200013773.mm.1 | 2,05  | 0,011932 | 0,431703                     |      |
| TC0200003232.mm.1 | -1,09 Cel           | JUC0200013772.mm.1 | -2,67 | 0,005501 | 0,379939                     |      |
| TC0200005184.mm.1 | -1,18 Ptgis         | JUC0200022900.mm.1 | 2,05  | 0,001237 | 0,322251                     |      |
| TC0200004459.mm.1 | -1,34 Tmem87a       | JUC0200019255.mm.1 | 2,05  | 0,021902 | 0,484824                     |      |
| TC0200003689.mm.1 | 1,17 Stk39          | JUC0200016047.mm.1 | 2,05  | 0,009066 | 0,412827                     |      |
| TC0100002411.mm.1 | -1,04 Wdr12         | JUC0100011193.mm.1 | 2,05  | 0,01973  | 0,474922                     |      |
| TC1700002267.mm.1 | -1,24 Satb1         | PSR1700021273.mm.1 | 2,05  | 0,015313 | 0,453561                     |      |
| TC0100002203.mm.1 | 1,04 Coa5           | JUC0100010037.mm.1 | 2,05  | 0,001829 | 0,337273                     |      |
| TC0100000845.mm.1 | -1,19 Mroh2a        | JUC0100004081.mm.1 | 2,05  | 0,002988 | 0,352663                     |      |
| TC1900000718.mm.1 | 1,2 Pdcd11          | JUC1900003453.mm.1 | 2,05  | 0,034499 | 0,525929                     |      |
| TC1900000756.mm.1 | -1,3 Dusp5          | JUC1900003612.mm.1 | 2,05  | 0,041262 | 0,544166                     |      |
| TC0800000650.mm.1 | 1,25 Nek1           | JUC0800002325.mm.1 | 2,05  | 0,016662 | 0,460023                     |      |
| TC0800000650.mm.1 | 1,25 Nek1           | JUC0800002326.mm.1 | -2,15 | 0,041316 | 0,54428                      |      |
| TC0800000650.mm.1 | 1,25 Nek1           | JUC0800002333.mm.1 | -2,18 | 0,041392 | 0,544587                     |      |
| TC0900001483.mm.1 | -1,12 Lrrfp2        | JUC0900006972.mm.1 | 2,05  | 0,006746 | 0,393343                     |      |
| TC0500000459.mm.1 | -1,48 Cpeb2         | JUC0500002464.mm.1 | 2,05  | 0,036068 | 0,529704                     |      |
| TC0500000459.mm.1 | -1,48 Cpeb2         | JUC0500002465.mm.1 | -3,07 | 0,037915 | 0,535116                     |      |

|                   |                               |                    |       |          |                              |      |
|-------------------|-------------------------------|--------------------|-------|----------|------------------------------|------|
| TC0600003393.mm.1 | 1,11                          | JUC0600014030.mm.1 | 2,05  | 0,019657 | 0,474887                     |      |
| TC0700001676.mm.1 | -1,49                         | JUC0700007214.mm.1 | 2,05  | 0,021334 | 0,481727                     |      |
| TC0600000190.mm.1 | -1,15 Wnt16                   | JUC0600000589.mm.1 | 2,05  | 0,019322 | 0,473294                     |      |
| TC0400001215.mm.1 | -1,18 Stil                    | JUC0400004580.mm.1 | 2,05  | 0,042225 | 0,546983                     |      |
| TC1000002583.mm.1 | 1,02 Aldh112                  | JUC1000010634.mm.1 | 2,05  | 0,034236 | 0,525168                     |      |
| TC1100002799.mm.1 | 1,29 Fam114a2                 | JUC1100013182.mm.1 | 2,05  | 0,033847 | 0,524033                     |      |
| TC1100003438.mm.1 | -1,19 Med13                   | JUC1100016536.mm.1 | 2,05  | 0,015464 | 0,454312                     |      |
| TC1100001748.mm.1 | -1,4 Mrc2                     | JUC1100008595.mm.1 | 2,05  | 0,004334 | 0,364898                     |      |
| TC0100003840.mm.1 | 1,52 Camk1g                   | JUC0100017834.mm.1 | 2,04  | 0,012011 | 0,432286                     |      |
| TC0100003840.mm.1 | 1,52 Camk1g                   | PSR0100031446.mm.1 | -2,05 | 0,00343  | 0,355303 Alternative 3' Acce | 0,22 |
| TC0100003840.mm.1 | 1,52 Camk1g                   | JUC0100017831.mm.1 | -2,16 | 0,013248 | 0,441416                     |      |
| TC0100003840.mm.1 | 1,52 Camk1g                   | PSR0100031436.mm.1 | -2,24 | 0,028023 | 0,505851 Cassette Exon       | 0,04 |
| TC0100003840.mm.1 | 1,52 Camk1g                   | PSR0100031451.mm.1 | -2,8  | 0,004628 | 0,369794 Cassette Exon       | 0,35 |
| TC0100003840.mm.1 | 1,52 Camk1g                   | JUC0100017842.mm.1 | -3,69 | 0,01042  | 0,42148                      |      |
| TC1600000353.mm.1 | -1,83 Lpp                     | PSR1600003466.mm.1 | 2,04  | 0,044906 | 0,55271 Alternative 3' Acce  | 0,19 |
| TC0300001699.mm.1 | -1,02 Crh                     | PSR0300013353.mm.1 | 2,04  | 0,003841 | 0,358714 Alternative 3' Acce | 0,17 |
| TC0500001785.mm.1 | 2,18                          | PSR0500016528.mm.1 | 2,04  | 0,003609 | 0,356223 Alternative 5' Donc | 0,17 |
| TC0500001785.mm.1 | 2,18                          | JUC0500008998.mm.1 | -3,29 | 0,014686 | 0,450253                     |      |
| TC0800002839.mm.1 | -1,53                         | PSR0800021864.mm.1 | 2,04  | 0,009429 | 0,416077 Alternative 3' Acce | 0,16 |
| TC1900001709.mm.1 | -1,16 Ccdc186; A630007B06Rik  | PSR1900015055.mm.1 | 2,04  | 0,030608 | 0,513486 Alternative 5' Donc | 0,15 |
| TC1300000611.mm.1 | -1,68                         | PSR1300003857.mm.1 | 2,04  | 0,006715 | 0,393343 Alternative 3' Acce | 0,14 |
| TC0400001646.mm.1 | 1,73 Rsrp1; D4Wsu53e          | PSR0400013126.mm.1 | 2,04  | 0,043475 | 0,549882 Intron Retention    | 0,13 |
| TC0400001646.mm.1 | 1,73 Rsrp1; D4Wsu53e          | JUC0400006801.mm.1 | -2,07 | 0,026469 | 0,501252                     |      |
| TC0700000628.mm.1 | -1,51 Scgb1b27                | PSR0700005366.mm.1 | 2,04  | 0,00819  | 0,40571 Cassette Exon        | 0,11 |
| TC1900001098.mm.1 | 1,21 Dagla                    | PSR1900010280.mm.1 | 2,04  | 0,027417 | 0,503961 Cassette Exon       | 0,09 |
| TC1900001098.mm.1 | 1,21 Dagla                    | PSR1900010271.mm.1 | -2,19 | 0,034518 | 0,525929 Cassette Exon       | 0,11 |
| TC0300002159.mm.1 | -1,41 Gm20356                 | PSR0300016229.mm.1 | 2,04  | 0,018048 | 0,467148 Cassette Exon       | 0,1  |
| TC0600000348.mm.1 | -1,35                         | PSR0600002666.mm.1 | 2,04  | 0,016435 | 0,459007 Cassette Exon       | 0,1  |
| TC1700000844.mm.1 | 1,18                          | PSR1700008103.mm.1 | 2,04  | 0,017507 | 0,463964 Cassette Exon       | 0,1  |
| TC1100002944.mm.1 | -1,86                         | PSR1100026834.mm.1 | 2,04  | 0,049684 | 0,563531 Cassette Exon       | 0,09 |
| TC0100001602.mm.1 | -1,35 Cd84                    | PSR0100013240.mm.1 | 2,04  | 0,024643 | 0,49468 Alternative 5' Donc  | 0,07 |
| TC0800002160.mm.1 | -1,09 Primpol; Ccdc111        | PSR0800016653.mm.1 | 2,04  | 0,009557 | 0,416829 Alternative 3' Acce | 0,06 |
| TC0900001137.mm.1 | 1,3 Gm10634                   | JUC0900004864.mm.1 | 2,04  | 0,021428 | 0,482126                     |      |
| TC0900001137.mm.1 | 1,3 Gm10634                   | PSR0900008924.mm.1 | 2,01  | 0,012562 | 0,435777 Cassette Exon       | 0,06 |
| TC1200001030.mm.1 | -1,83 Ifi27; Ifi27l1          | JUC1200004093.mm.1 | 2,04  | 0,00061  | 0,304044                     |      |
| TC1300001140.mm.1 | -1,31 Ccdc125                 | JUC1300003785.mm.1 | 2,04  | 0,00531  | 0,378059                     |      |
| TC0100002235.mm.1 | -1,23                         | JUC0100010198.mm.1 | 2,04  | 0,013033 | 0,439367                     |      |
| TC1700001188.mm.1 | 1,05 Gpatch11                 | JUC1700006150.mm.1 | 2,04  | 0,022852 | 0,488353                     |      |
| TC0100002772.mm.1 | -1,06 A730008H23Rik; Hjurp; G | JUC0100012695.mm.1 | 2,04  | 0,004852 | 0,37168                      |      |
| TC0100000077.mm.1 | -1,1                          | JUC0100000360.mm.1 | 2,04  | 0,003498 | 0,355638                     |      |
| TC0200002419.mm.1 | 1,07 Vstm2l                   | JUC0200009925.mm.1 | 2,04  | 0,019599 | 0,474724                     |      |
| TC1500001050.mm.1 | -1,15                         | JUC1500004694.mm.1 | 2,04  | 0,016545 | 0,459612                     |      |
| TC1500000686.mm.1 | -1,09                         | JUC1500002916.mm.1 | 2,04  | 0,008732 | 0,409583                     |      |
| TC1500000742.mm.1 | -1,1 Srebf2                   | JUC1500003299.mm.1 | 2,04  | 0,004341 | 0,365077                     |      |
| TC0200002125.mm.1 | -1,2 4930511F01Rik; Kif16bos  | JUC0200008456.mm.1 | 2,04  | 0,024485 | 0,493992                     |      |
| TC1700000036.mm.1 | 1,35 Zdhhc14                  | JUC1700000113.mm.1 | 2,04  | 0,019817 | 0,475294                     |      |
| TC1600001751.mm.1 | -1,04 Gpr128                  | JUC1600007397.mm.1 | 2,04  | 0,021334 | 0,481727                     |      |
| TC1600001751.mm.1 | -1,04 Gpr128                  | JUC1600007395.mm.1 | -2,38 | 0,011275 | 0,426793                     |      |

|                   |                               |                    |       |          |          |                          |
|-------------------|-------------------------------|--------------------|-------|----------|----------|--------------------------|
| TC0900000535.mm.1 | -2,51 Scn4b                   | JUC0900001891.mm.1 | 2,04  | 0,045404 | 0,554085 |                          |
| TC0700001580.mm.1 | -1,54 Olfml1                  | JUC0700006793.mm.1 | 2,04  | 0,028267 | 0,506588 |                          |
| TC1100002549.mm.1 | -1,41 Hmnr                    | JUC1100012290.mm.1 | 2,04  | 0,016123 | 0,457772 |                          |
| TC1100002770.mm.1 | -1,02 Tnip1                   | JUC1100013022.mm.1 | 2,04  | 0,031944 | 0,518107 |                          |
| TC1100002001.mm.1 | 1,03 Slc26a11                 | JUC1100009934.mm.1 | 2,04  | 0,048882 | 0,561732 |                          |
| TC1100003829.mm.1 | 1,86 Hdac5; Mir8101; mmu-mii  | PSR1100035562.mm.1 | 2,03  | 0,049825 | 0,563773 | Cassette Exon 0,19       |
| TC1100003829.mm.1 | 1,86 Hdac5; Mir8101; mmu-mii  | JUC1100018597.mm.1 | -2,28 | 0,022288 | 0,486084 |                          |
| TC1100003829.mm.1 | 1,86 Hdac5; Mir8101; mmu-mii  | JUC1100018584.mm.1 | -2,44 | 0,024212 | 0,493294 |                          |
| TC1100003829.mm.1 | 1,86 Hdac5; Mir8101; mmu-mii  | PSR1100035558.mm.1 | -2,47 | 0,027409 | 0,503961 | Intron Retention 0,35    |
| TC1100003829.mm.1 | 1,86 Hdac5; Mir8101; mmu-mii  | PSR1100035571.mm.1 | -3,43 | 0,043453 | 0,549792 | Cassette Exon 0,21       |
| TC1100003829.mm.1 | 1,86 Hdac5; Mir8101; mmu-mii  | JUC1100018580.mm.1 | -4,19 | 0,007978 | 0,403853 |                          |
| TC1700001852.mm.1 | 1,89 Zfp799                   | JUC1700009253.mm.1 | 2,03  | 0,026729 | 0,502096 |                          |
| TC1700001852.mm.1 | 1,89 Zfp799                   | PSR1700017139.mm.1 | -3,31 | 0,003118 | 0,353892 | Alternative 5' Donc 0,32 |
| TC1400001725.mm.1 | 5,81 Sncg                     | JUC1400007337.mm.1 | 2,03  | 0,033675 | 0,523549 |                          |
| TC1400001725.mm.1 | 5,81 Sncg                     | PSR1400013426.mm.1 | -2,39 | 0,002394 | 0,348564 | Cassette Exon 0,16       |
| TC1400001725.mm.1 | 5,81 Sncg                     | PSR1400013423.mm.1 | -2,66 | 0,032149 | 0,518586 | Cassette Exon 0,18       |
| TC1400001725.mm.1 | 5,81 Sncg                     | PSR1400013428.mm.1 | -5    | 0,003398 | 0,354856 | Alternative 5' Donc 0,26 |
| TC0300000359.mm.1 | -1,01 Naa15                   | PSR0300002561.mm.1 | 2,03  | 0,044415 | 0,551538 | Intron Retention 0,24    |
| TC0400001307.mm.1 | -1,64 Elovl1                  | PSR0400009836.mm.1 | 2,03  | 0,030527 | 0,51337  | Intron Retention 0,24    |
| TC1000001126.mm.1 | -1,93                         | PSR1000008517.mm.1 | 2,03  | 0,026485 | 0,501252 | Intron Retention 0,23    |
| TC0400003174.mm.1 | -1,39 4921539E11Rik           | PSR0400025237.mm.1 | 2,03  | 0,041368 | 0,544518 | Alternative 3' Acce 0,17 |
| TC0900002990.mm.1 | 1,12 Nek11                    | PSR0900024657.mm.1 | 2,03  | 0,000063 | 0,250119 | Alternative 5' Donc 0,15 |
| TC0200004010.mm.1 | -2,51 Olfr1167                | PSR0200033930.mm.1 | 2,03  | 0,031318 | 0,516204 | Alternative 3' Acce 0,15 |
| TC1000001914.mm.1 | -1,48                         | PSR1000013798.mm.1 | 2,03  | 0,024326 | 0,49362  | Alternative 5' Donc 0,13 |
| TC1700002120.mm.1 | -1,23 Cd2ap                   | PSR1700019843.mm.1 | 2,03  | 0,006134 | 0,387442 | Cassette Exon 0,12       |
| TC0100003313.mm.1 | -1,35 Tor1aip1                | PSR0100027059.mm.1 | 2,03  | 0,003528 | 0,355858 | Cassette Exon 0,11       |
| TC0400003760.mm.1 | -1,37 Srrm1                   | PSR0400030967.mm.1 | 2,03  | 0,004822 | 0,371408 | Intron Retention 0,11    |
| TC1100001196.mm.1 | -1,15 Adap2                   | PSR1100011159.mm.1 | 2,03  | 0,007964 | 0,403853 | Cassette Exon 0,1        |
| TC1200001516.mm.1 | 1,12 Gm9285                   | PSR1200010596.mm.1 | 2,03  | 0,013364 | 0,442141 | Cassette Exon 0,1        |
| TC1700002669.mm.1 | -1,14                         | PSR1700024290.mm.1 | 2,03  | 0,012353 | 0,434604 | Cassette Exon 0,1        |
| TC0100002266.mm.1 | -1,05 Uxs1                    | PSR0100018213.mm.1 | 2,03  | 0,000482 | 0,298999 | Alternative 3' Acce 0,09 |
| TC0600002812.mm.1 | 2,14                          | PSR0600021800.mm.1 | 2,03  | 0,001021 | 0,316361 | Cassette Exon 0,09       |
| TC0600002812.mm.1 | 2,14                          | PSR0600021801.mm.1 | -2,03 | 0,001021 | 0,316361 | Cassette Exon 0,09       |
| TC1500000939.mm.1 | -1,18 Ano6                    | PSR1500007455.mm.1 | 2,03  | 0,036505 | 0,531328 | Cassette Exon 0,09       |
| TC0100003090.mm.1 | -1,43 Sox13                   | PSR0100024822.mm.1 | 2,03  | 0,048531 | 0,560991 | Cassette Exon 0,08       |
| TC0400001425.mm.1 | 1,39 Inpp5b; Mir698           | PSR0400010708.mm.1 | 2,03  | 0,039882 | 0,54093  | Cassette Exon 0,08       |
| TC0500003734.mm.1 | 1,31 1500011B03Rik            | PSR0500033836.mm.1 | 2,03  | 0,02109  | 0,480371 | Cassette Exon 0,07       |
| TC1100000950.mm.1 | -1,01 Arrb2; Mir7115; mmu-mir | PSR1100008323.mm.1 | 2,03  | 0,005082 | 0,375364 | Cassette Exon 0,07       |
| TC0400002572.mm.1 | -1,34 Tomm5; Gm8069           | PSR0400020986.mm.1 | 2,03  | 0,025183 | 0,496638 | Cassette Exon 0,05       |
| TC0400002572.mm.1 | -1,34 Tomm5; Gm8069           | JUC0400010888.mm.1 | -2,17 | 0,048051 | 0,559717 |                          |
| TC0200003156.mm.1 | -1,02 C8g                     | JUC0200013182.mm.1 | 2,03  | 0,031494 | 0,516965 |                          |
| TC1400000930.mm.1 | -1,28 Ints9                   | JUC1400003980.mm.1 | 2,03  | 0,035532 | 0,528764 |                          |
| TC0200003269.mm.1 | 1 Sh3glb2                     | JUC0200013957.mm.1 | 2,03  | 0,024495 | 0,493992 |                          |
| TC0200002979.mm.1 | -1,04                         | JUC0200012428.mm.1 | 2,03  | 0,003209 | 0,354243 |                          |
| TC1100003890.mm.1 | 1,06 Kansl1                   | JUC1100019022.mm.1 | 2,03  | 0,016899 | 0,460797 |                          |
| TC1100003890.mm.1 | 1,06 Kansl1                   | JUC1100019029.mm.1 | -4,26 | 0,002057 | 0,341838 |                          |
| TC0200004430.mm.1 | 1,02 Gm14207                  | JUC0200018939.mm.1 | 2,03  | 0,006432 | 0,389972 |                          |
| TC0200004122.mm.1 | -1,15 F2                      | JUC0200017639.mm.1 | 2,03  | 0,034464 | 0,525929 |                          |



|                   |       |                          |                    |        |          |          |                          |
|-------------------|-------|--------------------------|--------------------|--------|----------|----------|--------------------------|
| TC1700002556.mm.1 | 1,31  | Heatr5b                  | JUC1700012546.mm.1 | 2,03   | 0,041525 | 0,544763 |                          |
| TC1700001386.mm.1 | 1,27  | Tmem181c-ps; Tmem181a    | JUC1700006831.mm.1 | 2,03   | 0,041271 | 0,544166 |                          |
| TC1700002135.mm.1 | -1,17 | Enpp4                    | JUC1700010609.mm.1 | 2,03   | 0,009955 | 0,41841  |                          |
| TC0100000315.mm.1 | 1,05  | Mrps9                    | JUC0100001330.mm.1 | 2,03   | 0,0356   | 0,528887 |                          |
| TC0200001368.mm.1 | -1,56 | Spi1; LOC100862024; Sfp1 | JUC0200005277.mm.1 | 2,03   | 0,013543 | 0,44358  |                          |
| TC0500002579.mm.1 | -1,13 | Txk                      | JUC0500012409.mm.1 | 2,03   | 0,047352 | 0,558291 |                          |
| TC0500002579.mm.1 | -1,13 | Txk                      | JUC0500012407.mm.1 | -2,23  | 0,012076 | 0,43255  |                          |
| TC0700004316.mm.1 | 1,13  | Tbc1d10b                 | JUC0700019131.mm.1 | 2,03   | 0,019226 | 0,472971 |                          |
| TC0500000687.mm.1 | -1,24 |                          | JUC0500003326.mm.1 | 2,03   | 0,006559 | 0,39213  |                          |
| TC0500000417.mm.1 | 1,58  | Ppp2r2c                  | JUC0500002293.mm.1 | 2,03   | 0,00393  | 0,359818 |                          |
| TC0700000315.mm.1 | -1,18 | Ceacam20                 | JUC0700001215.mm.1 | 2,03   | 0,015563 | 0,454812 |                          |
| TC0700000658.mm.1 | -1,69 | Rhpn2                    | JUC0700002742.mm.1 | 2,03   | 0,036662 | 0,531675 |                          |
| TC0700001198.mm.1 | 1,04  | Stard5                   | JUC0700005493.mm.1 | 2,03   | 0,040586 | 0,542474 |                          |
| TC0600001394.mm.1 | 2,56  | Necap1                   | JUC0600005921.mm.1 | 2,03   | 0,037517 | 0,533968 |                          |
| TC0600001394.mm.1 | 2,56  | Necap1                   | JUC0600005927.mm.1 | -3,02  | 0,018939 | 0,471376 |                          |
| TC0300003085.mm.1 | -1,4  | Clca5                    | JUC0300012728.mm.1 | 2,03   | 0,030077 | 0,511908 |                          |
| TC1100001293.mm.1 | 1,07  | Bcas3                    | JUC1100006412.mm.1 | 2,03   | 0,004678 | 0,370201 |                          |
| TC0300003234.mm.1 | -1,15 | Pear1                    | JUC0300009043.mm.1 | 2,03   | 0,036792 | 0,532063 |                          |
| TC1100002181.mm.1 | -1,02 | Tbrg4; Snora5c           | JUC1100011095.mm.1 | 2,03   | 0,035072 | 0,527576 |                          |
| TC0400004119.mm.1 | -1,21 | Prdm16                   | JUC0400017954.mm.1 | 2,03   | 0,018666 | 0,470205 |                          |
| TC0400004119.mm.1 | -1,21 | Prdm16                   | JUC0400017947.mm.1 | -2,1   | 0,011026 | 0,425657 |                          |
| TC0400003847.mm.1 | -1,03 | Pqlc2                    | JUC0400016479.mm.1 | 2,03   | 0,013652 | 0,444374 |                          |
| TC1000000025.mm.1 | -1,08 | Rmnd1; Gm16153           | JUC1000000073.mm.1 | 2,03   | 0,010071 | 0,418974 |                          |
| TC0X00002556.mm.1 | -1,63 | Gyk                      | JUC0X00008255.mm.1 | 2,03   | 0,029369 | 0,509995 |                          |
| TC0400002523.mm.1 | -1,51 | Cd72                     | JUC0400010643.mm.1 | 2,03   | 0,029062 | 0,508976 |                          |
| TC1000002828.mm.1 | 7,21  | Syt1                     | JUC1000011854.mm.1 | 2,02   | 0,018069 | 0,46716  |                          |
| TC1000002828.mm.1 | 7,21  | Syt1                     | PSR1000021546.mm.1 | -2,52  | 0,006711 | 0,393343 | Alternative 5' Donc 0,23 |
| TC1000002828.mm.1 | 7,21  | Syt1                     | JUC1000011856.mm.1 | -2,55  | 0,006976 | 0,395722 |                          |
| TC1000002828.mm.1 | 7,21  | Syt1                     | PSR1000021534.mm.1 | -2,93  | 0,004879 | 0,372195 | Alternative 5' Donc 0,22 |
| TC1000002828.mm.1 | 7,21  | Syt1                     | PSR1000021543.mm.1 | -3,12  | 0,010413 | 0,42148  | Cassette Exon 0,2        |
| TC1000002828.mm.1 | 7,21  | Syt1                     | PSR1000021537.mm.1 | -3,4   | 0,000486 | 0,298999 | Cassette Exon 0,22       |
| TC1000002828.mm.1 | 7,21  | Syt1                     | JUC1000011859.mm.1 | -3,4   | 0,003083 | 0,353892 |                          |
| TC1000002828.mm.1 | 7,21  | Syt1                     | PSR1000021540.mm.1 | -3,59  | 0,003011 | 0,353447 | Alternative 3' Acce 0,48 |
| TC1000002828.mm.1 | 7,21  | Syt1                     | PSR1000021539.mm.1 | -18,01 | 0,005702 | 0,382524 | Alternative 3' Acce 0,48 |
| TC0700002695.mm.1 | -1,13 | Plekhg2                  | PSR0700023594.mm.1 | 2,02   | 0,007623 | 0,401947 | Intron Retention 0,2     |
| TC1300002370.mm.1 | 2,02  | Gm26803                  | PSR1300015780.mm.1 | 2,02   | 0,00143  | 0,327447 |                          |
| TC1300002370.mm.1 | 2,02  | Gm26803                  | PSR1300015781.mm.1 | -2,02  | 0,00143  | 0,327447 | Cassette Exon 0,2        |
| TC1300002370.mm.1 | 2,02  | Gm26803                  | JUC1300008324.mm.1 | -3,38  | 0,000957 | 0,313363 |                          |
| TC0200002478.mm.1 | -1,11 | Mybl2                    | PSR0200020224.mm.1 | 2,02   | 0,026517 | 0,501411 | Alternative 3' Acce 0,16 |
| TC0400000580.mm.1 | 1,06  | Slc44a1                  | PSR0400004226.mm.1 | 2,02   | 0,009848 | 0,417839 | Alternative 5' Donc 0,16 |
| TC0900002451.mm.1 | -1,05 | Kif23                    | PSR0900020542.mm.1 | 2,02   | 0,006388 | 0,389608 | Alternative 5' Donc 0,16 |
| TC1300002197.mm.1 | -1,26 | Zfp367                   | PSR1300014168.mm.1 | 2,02   | 0,038888 | 0,537855 | Alternative 3' Acce 0,16 |
| TC0600000078.mm.1 | -1,2  | Phf14                    | PSR0600000600.mm.1 | 2,02   | 0,004856 | 0,37168  | Alternative 5' Donc 0,14 |
| TC0900001171.mm.1 | -1,6  | Plscr2                   | PSR0900009221.mm.1 | 2,02   | 0,029019 | 0,508842 | Alternative 5' Donc 0,14 |
| TC0100001678.mm.1 | 1,79  | Gm16432; Gm7068          | PSR0100013905.mm.1 | 2,02   | 0,002612 | 0,349501 | Cassette Exon 0,12       |
| TC0100001678.mm.1 | 1,79  | Gm16432; Gm7068          | PSR0100013896.mm.1 | -2,06  | 0,00974  | 0,417839 | Cassette Exon 0,1        |
| TC1900000787.mm.1 | -1,83 | Tcf7l2                   | PSR1900006905.mm.1 | 2,02   | 0,045149 | 0,553323 | Cassette Exon 0,12       |
| TC0100001260.mm.1 | -1,68 | Cacna1s                  | PSR0100010437.mm.1 | 2,02   | 0,045699 | 0,554833 | Cassette Exon 0,1        |

|                   |                           |                     |       |          |          |                          |
|-------------------|---------------------------|---------------------|-------|----------|----------|--------------------------|
| TC0100001260.mm.1 | -1,68 Cacna1s             | JUC0100006033.mm.1  | 2,02  | 0,014902 | 0,451803 |                          |
| TC0100001260.mm.1 | -1,68 Cacna1s             | JUC0100006002.mm.1  | -2,25 | 0,026034 | 0,49949  |                          |
| TC0500001399.mm.1 | -1,22 P2rx7; mmu-mir-8115 | PSR0500012387.mm.1  | 2,02  | 0,04212  | 0,546571 | Cassette Exon 0,1        |
| TC1100003672.mm.1 | 1,61 Neurod2              | PSR1100033834.mm.1  | 2,02  | 0,013654 | 0,444384 | Cassette Exon 0,09       |
| TC1100003672.mm.1 | 1,61 Neurod2              | PSR1100033835.mm.1  | -2,05 | 0,012625 | 0,436032 | Cassette Exon 0,1        |
| TC0400000455.mm.1 | 1,02 Reck                 | PSR0400003194.mm.1  | 2,02  | 0,007783 | 0,402902 | Cassette Exon 0,09       |
| TC0700000447.mm.1 | -1,41 Cyp2f2              | PSR0700003515.mm.1  | 2,02  | 0,008786 | 0,409822 | Cassette Exon 0,09       |
| TC1000000502.mm.1 | 1,36 Hsf2                 | PSR1000003266.mm.1  | 2,02  | 0,002129 | 0,342919 | Cassette Exon 0,09       |
| TC1600000487.mm.1 | -1,53 Mylk                | PSR1600004616.mm.1  | 2,02  | 0,042548 | 0,547918 | Cassette Exon 0,09       |
| TC1600000487.mm.1 | -1,53 Mylk                | JUC1600002428.mm.1  | 2,01  | 0,022914 | 0,488524 |                          |
| TC0100002371.mm.1 | 1,35 Tyw5                 | PSR0100019261.mm.1  | 2,02  | 0,029469 | 0,510123 | Intron Retention 0,08    |
| TC0400002446.mm.1 | -1,05 Gm6297              | PSR0400019702.mm.1  | 2,02  | 0,02418  | 0,493294 | Alternative 3' Acce 0,08 |
| TC1400002320.mm.1 | -1,04 RP23-103112.3       | PSR1400017985.mm.1  | 2,02  | 0,027251 | 0,503642 | Cassette Exon 0,08       |
| TC1400000514.mm.1 | -1,26 Fbxo34              | JUC1400002445.mm.1  | 2,02  | 0,019479 | 0,474295 |                          |
| TC0200003512.mm.1 | -1,29 Rnd3                | JUC0200015085.mm.1  | 2,02  | 0,020379 | 0,477603 |                          |
| TC1100003817.mm.1 | -1,23 Dusp3               | JUC1100018497.mm.1  | 2,02  | 0,00761  | 0,401767 |                          |
| TC1200000018.mm.1 | 1,55 Dnajc27              | JUC1200000143.mm.1  | 2,02  | 0,019302 | 0,473104 |                          |
| TC0200004936.mm.1 | -1,43                     | JUC0200021603.mm.1  | 2,02  | 0,002702 | 0,349612 |                          |
| TC1700002644.mm.1 | -1,11 Gm19696             | JUC1700012910.mm.1  | 2,02  | 0,004493 | 0,368808 |                          |
| TC1700001671.mm.1 | 1,02 Msln                 | JUC1700008301.mm.1  | 2,02  | 0,030731 | 0,514036 |                          |
| TC1700001671.mm.1 | 1,02 Msln                 | JUC1700008307.mm.1  | -2,05 | 0,030919 | 0,514584 |                          |
| TC1900001617.mm.1 | -1,17 Nt5c2               | JUC1900007944.mm.1  | 2,02  | 0,018325 | 0,468127 |                          |
| TC0100001294.mm.1 | -1,04 Dennd1b             | JUC0100006207.mm.1  | 2,02  | 0,035028 | 0,527498 |                          |
| TC1500000300.mm.1 | -1,37 Cthrc1              | JUC1500001247.mm.1  | 2,02  | 0,046252 | 0,556168 |                          |
| TC1600000376.mm.1 | 1,14 Il1rap               | JUC1600001862.mm.1  | 2,02  | 0,028275 | 0,506588 |                          |
| TC0200000512.mm.1 | -1,25 Urm1                | JUC0200001887.mm.1  | 2,02  | 0,036562 | 0,531355 |                          |
| TC0800001080.mm.1 | -1,31 Slc6a2              | JUC0800004436.mm.1  | 2,02  | 0,007774 | 0,402841 |                          |
| TC0800001125.mm.1 | -1,21 Gpr114              | JUC0800004692.mm.1  | 2,02  | 0,041035 | 0,543746 |                          |
| TC0900000500.mm.1 | -1,15 Mcam                | JUC0900001705.mm.1  | 2,02  | 0,021864 | 0,484635 |                          |
| TC0700003029.mm.1 | -1,12 Abcc6               | JUC0700014710.mm.1  | 2,02  | 0,023238 | 0,490032 |                          |
| TC0500003563.mm.1 | 1,21 Usp42                | JUC0500017760.mm.1  | 2,02  | 0,012802 | 0,437296 |                          |
| TC0700001879.mm.1 | -1,54 Tgfb1i1             | JUC0700008621.mm.1  | 2,02  | 0,01625  | 0,458312 |                          |
| TC0400004187.mm.1 | -1,13 Cyp4a10; Cyp4a31    | JUC0400004688.mm.1  | 2,02  | 0,041596 | 0,545    |                          |
| TC1000002501.mm.1 | -1,25 Tcf3                | JUC1000010164.mm.1  | 2,02  | 0,049044 | 0,561978 |                          |
| TC0Y00000005.mm.1 | 3,59 Kdm5d                | PSR0Y000000069.mm.1 | 2,02  | 0,016658 | 0,460022 |                          |
| TC0400002205.mm.1 | 1,08 Ints8                | JUC0400009611.mm.1  | 2,02  | 0,026729 | 0,502096 |                          |
| TC0200003313.mm.1 | 5,68 Stxbp1               | PSR0200028278.mm.1  | 2,01  | 0,002469 | 0,349135 | Cassette Exon 0,17       |
| TC0200003313.mm.1 | 5,68 Stxbp1               | PSR0200028285.mm.1  | -3,32 | 0,034217 | 0,525138 | Cassette Exon 0,25       |
| TC0200003313.mm.1 | 5,68 Stxbp1               | JUC0200014258.mm.1  | -3,48 | 0,004119 | 0,3623   |                          |
| TC0200003313.mm.1 | 5,68 Stxbp1               | PSR0200028263.mm.1  | -3,64 | 0,02041  | 0,477916 | Alternative 3' Acce 0,41 |
| TC0200003313.mm.1 | 5,68 Stxbp1               | PSR0200028266.mm.1  | -3,68 | 0,00599  | 0,386319 | Cassette Exon 0,27       |
| TC0200003313.mm.1 | 5,68 Stxbp1               | PSR0200028286.mm.1  | -6,2  | 0,009424 | 0,415987 | Cassette Exon 0,25       |
| TC0200003313.mm.1 | 5,68 Stxbp1               | PSR0200028279.mm.1  | -7,4  | 0,003592 | 0,356223 | Cassette Exon 0,41       |
| TC1000000079.mm.1 | 1,25 Shprh                | JUC1000000298.mm.1  | 2,01  | 0,035808 | 0,529247 |                          |
| TC1000000079.mm.1 | 1,25 Shprh                | PSR1000000539.mm.1  | -2,08 | 0,033829 | 0,523962 | Alternative 5' Donc 0,18 |
| TC1000000079.mm.1 | 1,25 Shprh                | PSR1000000580.mm.1  | -2,36 | 0,004131 | 0,3623   | Intron Retention 0,3     |
| TC0X00000912.mm.1 | 1,22 Zc3h12b              | PSR0X00005852.mm.1  | 2,01  | 0,026573 | 0,501636 | Intron Retention 0,25    |
| TC0X00000912.mm.1 | 1,22 Zc3h12b              | JUC0X00002883.mm.1  | -2,7  | 0,011108 | 0,426    |                          |

|                   |                               |                    |       |          |                              |      |
|-------------------|-------------------------------|--------------------|-------|----------|------------------------------|------|
| TC1100000294.mm.1 | 1,59 Ccdc88a                  | PSR1100002430.mm.1 | 2,01  | 0,008792 | 0,409822 Cassette Exon       | 0,1  |
| TC1100000294.mm.1 | 1,59 Ccdc88a                  | JUC1100001319.mm.1 | -2,07 | 0,029962 | 0,511499                     |      |
| TC1100000294.mm.1 | 1,59 Ccdc88a                  | PSR1100002457.mm.1 | -2,12 | 0,010003 | 0,41878 Alternative 5' Donc  | 0,14 |
| TC1100000294.mm.1 | 1,59 Ccdc88a                  | PSR1100002480.mm.1 | -2,8  | 0,029953 | 0,511499 Alternative 5' Donc | 0,22 |
| TC0700001644.mm.1 | -1,2 Mical2                   | PSR0700013660.mm.1 | 2,01  | 0,017041 | 0,461771 Cassette Exon       | 0,12 |
| TC0700001644.mm.1 | -1,2 Mical2                   | JUC0700007039.mm.1 | -2,15 | 0,048536 | 0,560994                     |      |
| TC0700001644.mm.1 | -1,2 Mical2                   | PSR0700013671.mm.1 | -3,05 | 0,014436 | 0,448973 Intron Retention    | 0,18 |
| TC0X00000742.mm.1 | -1,08 Brcc3                   | PSR0X00005159.mm.1 | 2,01  | 0,005774 | 0,383104 Alternative 5' Donc | 0,18 |
| TC1100002369.mm.1 | 1,75 0610010F05Rik            | JUC1100011601.mm.1 | 2,01  | 0,025188 | 0,496656                     |      |
| TC1100002369.mm.1 | 1,75 0610010F05Rik            | PSR1100022314.mm.1 | -2,31 | 0,01746  | 0,463886 Alternative 3' Acce | 0,17 |
| TC1600001048.mm.1 | 1,22 Morc3                    | PSR1600008167.mm.1 | 2,01  | 0,044306 | 0,551368 Alternative 5' Donc | 0,16 |
| TC0800002857.mm.1 | 1,82 A930006D01Rik            | PSR0800022061.mm.1 | 2,01  | 0,011915 | 0,431651 Alternative 3' Acce | 0,16 |
| TC0800002857.mm.1 | 1,82 A930006D01Rik            | PSR0800022062.mm.1 | -2,01 | 0,011915 | 0,431651 Cassette Exon       | 0,09 |
| TC0300002451.mm.1 | -1,15 BC021767                | PSR0300018832.mm.1 | 2,01  | 0,041858 | 0,545617 Alternative 5' Donc | 0,15 |
| TC1800000890.mm.1 | -1,71 Cyb5a; Cyb5             | PSR1800006447.mm.1 | 2,01  | 0,001176 | 0,319796 Alternative 5' Donc | 0,15 |
| TC0200003360.mm.1 | 1,24 Rab14                    | JUC0200014600.mm.1 | 2,01  | 0,023859 | 0,492097                     |      |
| TC0200003360.mm.1 | 1,24 Rab14                    | PSR0200028910.mm.1 | -2,02 | 0,023604 | 0,490995 Alternative 3' Acce | 0,14 |
| TC0100003186.mm.1 | -1,59 Cfhr1                   | PSR0100025837.mm.1 | 2,01  | 0,00045  | 0,297771 Alternative 5' Donc | 0,13 |
| TC1000002629.mm.1 | -1,04 Stab2                   | JUC1000010868.mm.1 | 2,01  | 0,048881 | 0,561732                     |      |
| TC1000002629.mm.1 | -1,04 Stab2                   | PSR1000019884.mm.1 | -2,38 | 0,037726 | 0,534622 Cassette Exon       | 0,13 |
| TC0300001449.mm.1 | -1,58 Gtf2b                   | PSR0300011718.mm.1 | 2,01  | 0,003998 | 0,361023 Cassette Exon       | 0,12 |
| TC0600003534.mm.1 | 1,75 Vamp1                    | PSR0600011872.mm.1 | 2,01  | 0,008861 | 0,410539 Cassette Exon       | 0,11 |
| TC0700003149.mm.1 | 4,54                          | PSR0700028323.mm.1 | 2,01  | 0,006209 | 0,387912 Cassette Exon       | 0,07 |
| TC0700003149.mm.1 | 4,54                          | PSR0700028324.mm.1 | -2,01 | 0,006209 | 0,387912 Cassette Exon       | 0,11 |
| TC0700004550.mm.1 | -1,32 Mob2                    | PSR0700038394.mm.1 | 2,01  | 0,028815 | 0,508347 Alternative 3' Acce | 0,11 |
| TC0100003881.mm.1 | 1,5 D630023F18Rik             | PSR0100020159.mm.1 | 2,01  | 0,008376 | 0,4065 Cassette Exon         | 0,09 |
| TC0700002826.mm.1 | -1,19 Uba2                    | PSR0700025246.mm.1 | 2,01  | 0,019118 | 0,472394 Cassette Exon       | 0,09 |
| TC0700004224.mm.1 | -1,02 Ndufab1                 | PSR0700035180.mm.1 | 2,01  | 0,044384 | 0,551441 Cassette Exon       | 0,09 |
| TC0X00001419.mm.1 | 3,3 A730046J19Rik             | PSR0X00008991.mm.1 | 2,01  | 0,00548  | 0,379939 Cassette Exon       | 0,09 |
| TC0700000368.mm.1 | 1,16 Zfp180                   | PSR0700002652.mm.1 | 2,01  | 0,017595 | 0,464312 Cassette Exon       | 0,08 |
| TC0X00002382.mm.1 | 1,03 1700111N16Rik            | PSR0X00014729.mm.1 | 2,01  | 0,003311 | 0,354243 Cassette Exon       | 0,08 |
| TC0400003237.mm.1 | -1,04 Zyg11b                  | PSR0400025778.mm.1 | 2,01  | 0,002316 | 0,346468 Alternative 3' Acce | 0,07 |
| TC0700000806.mm.1 | -1,55 Josd2; Mir7052; mmu-mir | PSR0700006656.mm.1 | 2,01  | 0,044648 | 0,552129 Cassette Exon       | 0,07 |
| TC0600000941.mm.1 | -1,35 Nagk                    | PSR0600007213.mm.1 | 2,01  | 0,026017 | 0,499373 Alternative 3' Acce | 0,06 |
| TC1400001902.mm.1 | -1,03 Fermt2                  | JUC1400007906.mm.1 | 2,01  | 0,040921 | 0,543423                     |      |
| TC0200005145.mm.1 | 1,11 Slc35c2                  | JUC0200022647.mm.1 | 2,01  | 0,004979 | 0,373851                     |      |
| TC0200004942.mm.1 | -1,36 E2f1                    | JUC0200021647.mm.1 | 2,01  | 0,029482 | 0,510123                     |      |
| TC0100002236.mm.1 | 1,52 Tbc1d8                   | JUC0100010216.mm.1 | 2,01  | 0,004982 | 0,373851                     |      |
| TC0100002236.mm.1 | 1,52 Tbc1d8                   | JUC0100010201.mm.1 | -3,69 | 0,047828 | 0,559283                     |      |
| TC0100000332.mm.1 | -1,05 Tpp2                    | JUC0100001360.mm.1 | 2,01  | 0,004386 | 0,366156                     |      |
| TC1900000439.mm.1 | -1,08 Jak2                    | JUC1900002087.mm.1 | 2,01  | 0,013275 | 0,441681                     |      |
| TC0200002401.mm.1 | -1,16 Tgif2                   | JUC0200009829.mm.1 | 2,01  | 0,039511 | 0,539762                     |      |
| TC1700000835.mm.1 | 1,34 Pla2g7                   | JUC1700004331.mm.1 | 2,01  | 0,044991 | 0,552961                     |      |
| TC0800001630.mm.1 | -1,17 BC068157                | PSR0800013434.mm.1 | 2,01  | 0,000092 | 0,255472                     |      |
| TC0800000132.mm.1 | -1,05 Upf3a                   | JUC0800000717.mm.1 | 2,01  | 0,004159 | 0,3623                       |      |
| TC0900000783.mm.1 | -1,14                         | JUC0900003131.mm.1 | 2,01  | 0,013328 | 0,441836                     |      |
| TC0900000126.mm.1 | 1,07 Slc36a4                  | JUC0900000463.mm.1 | 2,01  | 0,009838 | 0,417839                     |      |
| TC0600000852.mm.1 | -1,39 Capg                    | JUC0600003288.mm.1 | 2,01  | 0,026228 | 0,500189                     |      |

|                   |               |                    |        |          |          |                          |
|-------------------|---------------|--------------------|--------|----------|----------|--------------------------|
| TC0600000388.mm.1 | -1,35 Tbxas1  | JUC0600001506.mm.1 | 2,01   | 0,024684 | 0,49472  |                          |
| TC0700002024.mm.1 | -1,72 Urah    | JUC0700009411.mm.1 | 2,01   | 0,022919 | 0,488542 |                          |
| TC1100002207.mm.1 | 1,03 Tns3     | JUC1100011138.mm.1 | 2,01   | 0,014744 | 0,450631 |                          |
| TC0X00003413.mm.1 | -1,25 Gm14459 | JUC0X00005868.mm.1 | 2,01   | 0,048803 | 0,561497 |                          |
| TC0Y00000016.mm.1 | -1,03 Gm21064 | JUC0Y00000156.mm.1 | 2,01   | 0,020858 | 0,479521 |                          |
| TC0Y00000016.mm.1 | -1,03 Gm21064 | JUC0Y00000138.mm.1 | -2,15  | 0,034599 | 0,52602  |                          |
| TC0Y00000016.mm.1 | -1,03 Gm21064 | JUC0Y00000160.mm.1 | -2,27  | 0,000797 | 0,311589 |                          |
| TC0100003620.mm.1 | 2,11 Cep170   | JUC0100016915.mm.1 | -2,01  | 0,024009 | 0,492783 |                          |
| TC0100003620.mm.1 | 2,11 Cep170   | JUC0100016900.mm.1 | -2,07  | 0,025096 | 0,496269 |                          |
| TC0100003620.mm.1 | 2,11 Cep170   | PSR0100029759.mm.1 | -2,5   | 0,01359  | 0,443703 | Cassette Exon 0,18       |
| TC0100003620.mm.1 | 2,11 Cep170   | JUC0100016910.mm.1 | -2,54  | 0,026906 | 0,502518 |                          |
| TC0100003620.mm.1 | 2,11 Cep170   | PSR0100029750.mm.1 | -2,59  | 0,028168 | 0,506368 | Cassette Exon 0,19       |
| TC0100003620.mm.1 | 2,11 Cep170   | PSR0100029734.mm.1 | -3,78  | 0,002984 | 0,352501 | Intron Retention 0,67    |
| TC0100003620.mm.1 | 2,11 Cep170   | JUC0100016912.mm.1 | -5,38  | 0,0068   | 0,393614 |                          |
| TC0900001942.mm.1 | 1,23 Acad8    | JUC0900009261.mm.1 | -2,01  | 0,019221 | 0,472971 |                          |
| TC0900001942.mm.1 | 1,23 Acad8    | PSR0900016347.mm.1 | -2,42  | 0,034221 | 0,525151 | Alternative 5' Donc 0,24 |
| TC0900001942.mm.1 | 1,23 Acad8    | PSR0900016339.mm.1 | -3,11  | 0,030081 | 0,511908 | Intron Retention 0,52    |
| TC0900001942.mm.1 | 1,23 Acad8    | JUC0900009266.mm.1 | -3,51  | 0,004601 | 0,369794 |                          |
| TC1200000718.mm.1 | 11,07 Rdh12   | PSR1200005115.mm.1 | -2,01  | 0,016442 | 0,459025 | Cassette Exon 0,23       |
| TC1200000718.mm.1 | 11,07 Rdh12   | JUC1200002925.mm.1 | -2,56  | 0,024198 | 0,493294 |                          |
| TC1200000718.mm.1 | 11,07 Rdh12   | PSR1200005117.mm.1 | -2,87  | 0,019717 | 0,474887 | Intron Retention 0,44    |
| TC1200000718.mm.1 | 11,07 Rdh12   | JUC1200002927.mm.1 | -3,26  | 0,00474  | 0,370933 |                          |
| TC1200000718.mm.1 | 11,07 Rdh12   | PSR1200005113.mm.1 | -3,51  | 0,015673 | 0,455416 | Cassette Exon 0,29       |
| TC1200000718.mm.1 | 11,07 Rdh12   | PSR1200005114.mm.1 | -7,82  | 0,002274 | 0,345991 | Alternative 3' Acce 0,26 |
| TC1200000718.mm.1 | 11,07 Rdh12   | PSR1200005118.mm.1 | -13,49 | 0,001572 | 0,331411 | Intron Retention 0,44    |
| TC0300000419.mm.1 | 2,12 Dclk1    | PSR0300003024.mm.1 | -2,01  | 0,007217 | 0,39826  | Cassette Exon 0,31       |
| TC0300000419.mm.1 | 2,12 Dclk1    | JUC0300001556.mm.1 | -2,07  | 0,003229 | 0,354243 |                          |
| TC0300000419.mm.1 | 2,12 Dclk1    | PSR0300003000.mm.1 | -2,09  | 0,01877  | 0,470771 | Cassette Exon 0,23       |
| TC0300000419.mm.1 | 2,12 Dclk1    | JUC0300001566.mm.1 | -2,14  | 0,024193 | 0,493294 |                          |
| TC0300000419.mm.1 | 2,12 Dclk1    | PSR0300003011.mm.1 | -2,2   | 0,025512 | 0,497664 | Alternative 5' Donc 0,12 |
| TC0300000419.mm.1 | 2,12 Dclk1    | PSR0300003003.mm.1 | -2,33  | 0,007293 | 0,398847 | Cassette Exon 0,1        |
| TC0300000419.mm.1 | 2,12 Dclk1    | PSR0300003017.mm.1 | -2,41  | 0,001013 | 0,316361 | Cassette Exon 0,18       |
| TC0300000419.mm.1 | 2,12 Dclk1    | PSR0300003002.mm.1 | -2,47  | 0,004035 | 0,361636 | Cassette Exon 0,29       |
| TC0300000419.mm.1 | 2,12 Dclk1    | PSR0300003026.mm.1 | -2,5   | 0,001819 | 0,336896 | Alternative 5' Donc 0,15 |
| TC0300000419.mm.1 | 2,12 Dclk1    | PSR0300003023.mm.1 | -2,57  | 0,027146 | 0,503137 | Cassette Exon 0,34       |
| TC0300000419.mm.1 | 2,12 Dclk1    | PSR0300003006.mm.1 | -2,59  | 0,018104 | 0,467161 | Alternative 3' Acce 0,25 |
| TC0300000419.mm.1 | 2,12 Dclk1    | PSR0300003004.mm.1 | -2,61  | 0,018423 | 0,468579 | Cassette Exon 0,15       |
| TC0300000419.mm.1 | 2,12 Dclk1    | JUC0300001576.mm.1 | -2,74  | 0,034315 | 0,525546 |                          |
| TC0300000419.mm.1 | 2,12 Dclk1    | JUC0300001557.mm.1 | -2,84  | 0,01077  | 0,423955 |                          |
| TC0300000419.mm.1 | 2,12 Dclk1    | PSR0300003007.mm.1 | -2,85  | 0,01816  | 0,467432 | Alternative 3' Acce 0,25 |
| TC0300000419.mm.1 | 2,12 Dclk1    | JUC0300001572.mm.1 | -2,92  | 0,043315 | 0,549297 |                          |
| TC0300000419.mm.1 | 2,12 Dclk1    | PSR0300003005.mm.1 | -2,94  | 0,003194 | 0,354243 | Alternative 3' Acce 0,25 |
| TC0300000419.mm.1 | 2,12 Dclk1    | PSR0300003001.mm.1 | -2,96  | 0,020693 | 0,479027 | Cassette Exon 0,4        |
| TC0300000419.mm.1 | 2,12 Dclk1    | JUC0300001578.mm.1 | -3,97  | 0,002553 | 0,349501 |                          |
| TC0300000419.mm.1 | 2,12 Dclk1    | JUC0300001558.mm.1 | -4,42  | 0,021834 | 0,484607 |                          |
| TC0300000419.mm.1 | 2,12 Dclk1    | PSR0300002998.mm.1 | -4,99  | 0,024559 | 0,494116 | Cassette Exon 0,28       |
| TC0500002073.mm.1 | 2,74 Kcnh2    | PSR0500018833.mm.1 | -2,01  | 0,003959 | 0,359922 |                          |
| TC0500002073.mm.1 | 2,74 Kcnh2    | PSR0500018837.mm.1 | -2,05  | 0,004558 | 0,369262 | Cassette Exon 0,1        |

|                   |                               |                    |       |          |                              |      |
|-------------------|-------------------------------|--------------------|-------|----------|------------------------------|------|
| TC0500002073.mm.1 | 2,74 Kcnh2                    | PSR0500018817.mm.1 | -2,36 | 0,011241 | 0,426718 Cassette Exon       | 0,12 |
| TC0500002073.mm.1 | 2,74 Kcnh2                    | PSR0500018821.mm.1 | -2,55 | 0,014874 | 0,451677 Cassette Exon       | 0,24 |
| TC0500002073.mm.1 | 2,74 Kcnh2                    | JUC0500010262.mm.1 | -2,59 | 0,003034 | 0,353543                     |      |
| TC0500002073.mm.1 | 2,74 Kcnh2                    | PSR0500018820.mm.1 | -2,82 | 0,004102 | 0,36228 Cassette Exon        | 0,25 |
| TC0500002073.mm.1 | 2,74 Kcnh2                    | JUC0500010255.mm.1 | -2,91 | 0,003752 | 0,357586                     |      |
| TC0500002073.mm.1 | 2,74 Kcnh2                    | PSR0500018828.mm.1 | -3,18 | 0,00154  | 0,330388 Alternative 3' Acce | 0,35 |
| TC0500002073.mm.1 | 2,74 Kcnh2                    | PSR0500018827.mm.1 | -3,5  | 0,000983 | 0,31497 Alternative 5' Donc  | 0,4  |
| TC0500002073.mm.1 | 2,74 Kcnh2                    | PSR0500018838.mm.1 | -3,77 | 0,000381 | 0,293183 Cassette Exon       | 0,28 |
| TC0500003104.mm.1 | 2,24 Ccdc64                   | PSR0500027643.mm.1 | -2,01 | 0,000032 | 0,237924 Cassette Exon       | 0,15 |
| TC0500003104.mm.1 | 2,24 Ccdc64                   | PSR0500027656.mm.1 | -2,06 | 0,008826 | 0,410288 Alternative 5' Donc | 0,11 |
| TC0500003104.mm.1 | 2,24 Ccdc64                   | PSR0500027651.mm.1 | -2,07 | 0,016089 | 0,457532 Cassette Exon       | 0,19 |
| TC0500003104.mm.1 | 2,24 Ccdc64                   | PSR0500027634.mm.1 | -2,19 | 0,006383 | 0,389554 Cassette Exon       | 0,16 |
| TC0500003104.mm.1 | 2,24 Ccdc64                   | PSR0500027636.mm.1 | -2,28 | 0,031323 | 0,516204 Cassette Exon       | 0,22 |
| TC0500003104.mm.1 | 2,24 Ccdc64                   | PSR0500027653.mm.1 | -2,28 | 0,018866 | 0,471054 Alternative 3' Acce | 0,2  |
| TC0500003104.mm.1 | 2,24 Ccdc64                   | JUC0500015060.mm.1 | -2,84 | 0,008301 | 0,406122                     |      |
| TC0500003104.mm.1 | 2,24 Ccdc64                   | JUC0500015074.mm.1 | -2,93 | 0,029915 | 0,511499                     |      |
| TC0500003104.mm.1 | 2,24 Ccdc64                   | JUC0500015067.mm.1 | -3,34 | 0,016502 | 0,459434                     |      |
| TC0500003104.mm.1 | 2,24 Ccdc64                   | PSR0500027648.mm.1 | -3,53 | 0,036007 | 0,529546 Alternative 5' Donc | 0,4  |
| TC0300000494.mm.1 | 3,63 Arhgef26                 | PSR0300003429.mm.1 | -2,01 | 0,034522 | 0,52593 Cassette Exon        | 0,24 |
| TC0300000494.mm.1 | 3,63 Arhgef26                 | JUC0300001791.mm.1 | -2,23 | 0,015455 | 0,45429                      |      |
| TC0300000494.mm.1 | 3,63 Arhgef26                 | PSR0300003422.mm.1 | -2,41 | 0,021491 | 0,482644 Cassette Exon       | 0,18 |
| TC0300000494.mm.1 | 3,63 Arhgef26                 | PSR0300003434.mm.1 | -2,55 | 0,00338  | 0,354359 Cassette Exon       | 0,29 |
| TC0300000494.mm.1 | 3,63 Arhgef26                 | PSR0300003420.mm.1 | -2,62 | 0,018646 | 0,470078 Cassette Exon       | 0,13 |
| TC0300000494.mm.1 | 3,63 Arhgef26                 | PSR0300003415.mm.1 | -3,31 | 0,003564 | 0,356223 Alternative 3' Acce | 0,39 |
| TC0300000494.mm.1 | 3,63 Arhgef26                 | JUC0300001797.mm.1 | -3,36 | 0,022968 | 0,488818                     |      |
| TC0300000494.mm.1 | 3,63 Arhgef26                 | PSR0300003414.mm.1 | -3,52 | 0,008738 | 0,409622 Alternative 3' Acce | 0,39 |
| TC0300000494.mm.1 | 3,63 Arhgef26                 | JUC0300001799.mm.1 | -3,57 | 0,016488 | 0,459391                     |      |
| TC0300000494.mm.1 | 3,63 Arhgef26                 | PSR0300003423.mm.1 | -3,8  | 0,000559 | 0,304044 Cassette Exon       | 0,31 |
| TC0300000494.mm.1 | 3,63 Arhgef26                 | PSR0300003413.mm.1 | -5,01 | 0,001079 | 0,317191 Alternative 3' Acce | 0,39 |
| TC0300000494.mm.1 | 3,63 Arhgef26                 | JUC0300001794.mm.1 | -6,52 | 0,015035 | 0,452111                     |      |
| TC1200001110.mm.1 | 1,75 Evl                      | PSR1200007914.mm.1 | -2,01 | 0,013035 | 0,439367 Cassette Exon       | 0,09 |
| TC1200001110.mm.1 | 1,75 Evl                      | PSR1200007916.mm.1 | -2,42 | 0,007182 | 0,397855 Cassette Exon       | 0,19 |
| TC1200001110.mm.1 | 1,75 Evl                      | PSR1200007929.mm.1 | -2,68 | 0,012469 | 0,435315 Cassette Exon       | 0,35 |
| TC1200001110.mm.1 | 1,75 Evl                      | PSR1200007927.mm.1 | -2,68 | 0,007012 | 0,395737 Cassette Exon       | 0,18 |
| TC1200001110.mm.1 | 1,75 Evl                      | JUC1200004439.mm.1 | -2,82 | 0,002001 | 0,341091                     |      |
| TC1200001110.mm.1 | 1,75 Evl                      | JUC1200004438.mm.1 | -3,56 | 0,000183 | 0,284485                     |      |
| TC0500002830.mm.1 | 2,96 Tmem150c                 | PSR0500024897.mm.1 | -2,01 | 0,004621 | 0,369794 Alternative 3' Acce | 0,13 |
| TC0500002830.mm.1 | 2,96 Tmem150c                 | PSR0500024908.mm.1 | -2,12 | 0,030846 | 0,514331 Cassette Exon       | 0,19 |
| TC0500002830.mm.1 | 2,96 Tmem150c                 | PSR0500024906.mm.1 | -2,84 | 0,010807 | 0,424055 Cassette Exon       | 0,17 |
| TC0500002830.mm.1 | 2,96 Tmem150c                 | PSR0500024907.mm.1 | -2,94 | 0,009258 | 0,414559 Cassette Exon       | 0,18 |
| TC0500002830.mm.1 | 2,96 Tmem150c                 | PSR0500024904.mm.1 | -2,97 | 0,007244 | 0,39826 Cassette Exon        | 0,18 |
| TC0500002830.mm.1 | 2,96 Tmem150c                 | PSR0500024909.mm.1 | -4,35 | 0,005914 | 0,384138 Alternative 5' Donc | 0,3  |
| TC0400000396.mm.1 | 3,08 Gm13306; Ccl27b; Ccl27a; | JUC0400001233.mm.1 | -2,01 | 0,044044 | 0,550824                     |      |
| TC0400000396.mm.1 | 3,08 Gm13306; Ccl27b; Ccl27a; | PSR0400002555.mm.1 | -2,46 | 0,042776 | 0,548097 Cassette Exon       | 0,23 |
| TC0400000396.mm.1 | 3,08 Gm13306; Ccl27b; Ccl27a; | PSR0400002541.mm.1 | -2,66 | 0,010391 | 0,421344 Alternative 3' Acce | 0,25 |
| TC0400000396.mm.1 | 3,08 Gm13306; Ccl27b; Ccl27a; | PSR0400002548.mm.1 | -2,78 | 0,003201 | 0,354243 Cassette Exon       | 0,22 |
| TC0400000396.mm.1 | 3,08 Gm13306; Ccl27b; Ccl27a; | PSR0400002538.mm.1 | -3,27 | 0,021772 | 0,48438 Alternative 3' Acce  | 0,29 |
| TC0400000396.mm.1 | 3,08 Gm13306; Ccl27b; Ccl27a; | JUC0400001236.mm.1 | -3,32 | 0,028832 | 0,508414                     |      |

|                   |      |                                             |       |          |          |                          |
|-------------------|------|---------------------------------------------|-------|----------|----------|--------------------------|
| TC0400000396.mm.1 | 3,08 | Gm13306; Ccl27b; Ccl27a; JUC0400001239.mm.1 | -3,71 | 0,004514 | 0,368648 |                          |
| TC0400000396.mm.1 | 3,08 | Gm13306; Ccl27b; Ccl27a; JUC0400001237.mm.1 | -3,86 | 0,002924 | 0,352289 |                          |
| TC1700002420.mm.1 | 2,88 | Ankrd12 PSR1700022447.mm.1                  | -2,01 | 0,039887 | 0,54093  | Cassette Exon 0,12       |
| TC1700002420.mm.1 | 2,88 | Ankrd12 PSR1700022451.mm.1                  | -2,2  | 0,010743 | 0,423772 | Cassette Exon 0,13       |
| TC1700002420.mm.1 | 2,88 | Ankrd12 PSR1700022438.mm.1                  | -2,41 | 0,013089 | 0,439727 | Cassette Exon 0,07       |
| TC1700002420.mm.1 | 2,88 | Ankrd12 PSR1700022462.mm.1                  | -2,48 | 0,024635 | 0,49468  | Cassette Exon 0,28       |
| TC1700002420.mm.1 | 2,88 | Ankrd12 PSR1700022463.mm.1                  | -2,5  | 0,026294 | 0,5006   | Cassette Exon 0,28       |
| TC1700002420.mm.1 | 2,88 | Ankrd12 JUC1700012017.mm.1                  | -2,62 | 0,023952 | 0,4926   |                          |
| TC1700002420.mm.1 | 2,88 | Ankrd12 PSR1700022453.mm.1                  | -2,63 | 0,024206 | 0,493294 | Alternative 3' Acce 0,21 |
| TC1700002420.mm.1 | 2,88 | Ankrd12 PSR1700022444.mm.1                  | -2,69 | 0,006153 | 0,387873 | Cassette Exon 0,09       |
| TC1700002420.mm.1 | 2,88 | Ankrd12 PSR1700022465.mm.1                  | -2,76 | 0,04116  | 0,544039 | Cassette Exon 0,17       |
| TC1700002420.mm.1 | 2,88 | Ankrd12 JUC1700012029.mm.1                  | -2,81 | 0,002866 | 0,352207 |                          |
| TC1700002420.mm.1 | 2,88 | Ankrd12 PSR1700022457.mm.1                  | -2,85 | 0,008715 | 0,409266 | Alternative 3' Acce 0,17 |
| TC1700002420.mm.1 | 2,88 | Ankrd12 JUC1700012031.mm.1                  | -5,35 | 0,014793 | 0,450911 |                          |
| TC0100000055.mm.1 | 2,65 | Prex2 PSR0100000545.mm.1                    | -2,01 | 0,024296 | 0,49362  | Alternative 5' Donc 0,11 |
| TC0100000055.mm.1 | 2,65 | Prex2 JUC0100000292.mm.1                    | -2,05 | 0,012731 | 0,436677 |                          |
| TC0100000055.mm.1 | 2,65 | Prex2 JUC0100000293.mm.1                    | -2,2  | 0,041439 | 0,544646 |                          |
| TC0100000055.mm.1 | 2,65 | Prex2 PSR0100000539.mm.1                    | -2,3  | 0,029061 | 0,508976 | Cassette Exon 0,14       |
| TC0100000055.mm.1 | 2,65 | Prex2 PSR0100000546.mm.1                    | -2,33 | 0,01576  | 0,455437 | Alternative 5' Donc 0,11 |
| TC0100000055.mm.1 | 2,65 | Prex2 PSR0100000501.mm.1                    | -2,36 | 0,033601 | 0,523309 | Cassette Exon 0,22       |
| TC0100000055.mm.1 | 2,65 | Prex2 PSR0100000519.mm.1                    | -2,4  | 0,016738 | 0,460345 | Alternative 5' Donc 0,16 |
| TC0100000055.mm.1 | 2,65 | Prex2 PSR0100000516.mm.1                    | -2,62 | 0,044915 | 0,552742 | Alternative 3' Acce 0,22 |
| TC0100000055.mm.1 | 2,65 | Prex2 PSR0100000499.mm.1                    | -2,76 | 0,020819 | 0,47952  | Cassette Exon 0,17       |
| TC0100000055.mm.1 | 2,65 | Prex2 PSR0100000523.mm.1                    | -3,37 | 0,008538 | 0,407916 | Alternative 5' Donc 0,23 |
| TC1600000213.mm.1 | 1,72 | Tmem191c PSR1600001745.mm.1                 | -2,01 | 0,027462 | 0,504045 | Intron Retention 0,23    |
| TC1600000213.mm.1 | 1,72 | Tmem191c JUC1600000902.mm.1                 | -2,3  | 0,006028 | 0,386586 |                          |
| TC1600000213.mm.1 | 1,72 | Tmem191c PSR1600001751.mm.1                 | -2,41 | 0,036294 | 0,530447 | Alternative 5' Donc 0,18 |
| TC1600001134.mm.1 | 1,46 | Coro7 PSR1600008992.mm.1                    | -2,01 | 0,02492  | 0,4958   | Cassette Exon 0,22       |
| TC1600001134.mm.1 | 1,46 | Coro7 JUC1600004707.mm.1                    | -2,25 | 0,000068 | 0,250992 |                          |
| TC1600001134.mm.1 | 1,46 | Coro7 JUC1600004723.mm.1                    | -2,83 | 0,027446 | 0,504041 |                          |
| TC1600001134.mm.1 | 1,46 | Coro7 JUC1600004691.mm.1                    | -3,16 | 0,019609 | 0,474765 |                          |
| TC1300000882.mm.1 | 1,81 | lpcat1 JUC1300002953.mm.1                   | -2,01 | 0,035804 | 0,529215 |                          |
| TC1300000882.mm.1 | 1,81 | lpcat1 PSR1300005637.mm.1                   | -2,29 | 0,007935 | 0,403819 | Alternative 5' Donc 0,21 |
| TC1300000882.mm.1 | 1,81 | lpcat1 JUC1300002954.mm.1                   | -3,36 | 0,00742  | 0,399901 |                          |
| TC0100002209.mm.1 | 1,45 | Tsga10 PSR0100017781.mm.1                   | -2,01 | 0,04961  | 0,563407 | Alternative 3' Acce 0,15 |
| TC0100002209.mm.1 | 1,45 | Tsga10 PSR0100017783.mm.1                   | -2,16 | 0,044115 | 0,550916 | Intron Retention 0,2     |
| TC1400000119.mm.1 | 1,92 | Slc4a7 JUC1400000577.mm.1                   | -2,01 | 0,037648 | 0,534212 |                          |
| TC1400000119.mm.1 | 1,92 | Slc4a7 PSR1400000938.mm.1                   | -2,02 | 0,033865 | 0,524071 | Cassette Exon 0,2        |
| TC1400000119.mm.1 | 1,92 | Slc4a7 PSR1400000951.mm.1                   | -2,08 | 0,013739 | 0,444758 | Alternative 5' Donc 0,13 |
| TC1400000119.mm.1 | 1,92 | Slc4a7 JUC1400000564.mm.1                   | -2,26 | 0,0086   | 0,408294 |                          |
| TC1400000119.mm.1 | 1,92 | Slc4a7 JUC1400000569.mm.1                   | -2,66 | 0,018698 | 0,470429 |                          |
| TC1400000119.mm.1 | 1,92 | Slc4a7 JUC1400000570.mm.1                   | -2,84 | 0,00359  | 0,356223 |                          |
| TC1400000119.mm.1 | 1,92 | Slc4a7 JUC1400000592.mm.1                   | -3,53 | 0,004056 | 0,361816 |                          |
| TC1400000119.mm.1 | 1,92 | Slc4a7 JUC1400000587.mm.1                   | -3,77 | 0,0117   | 0,429969 |                          |
| TC1400000119.mm.1 | 1,92 | Slc4a7 JUC1400000593.mm.1                   | -3,84 | 0,012794 | 0,437245 |                          |
| TC1400000119.mm.1 | 1,92 | Slc4a7 JUC1400000596.mm.1                   | -5,08 | 0,005078 | 0,375342 |                          |
| TC1400001184.mm.1 | 1,78 | PSR1400009299.mm.1                          | -2,01 | 0,022498 | 0,487114 | Cassette Exon 0,09       |
| TC1400001184.mm.1 | 1,78 | PSR1400009275.mm.1                          | -2,08 | 0,046939 | 0,557545 | Cassette Exon 0,17       |

|                   |                                                  |                    |       |          |          |                     |      |
|-------------------|--------------------------------------------------|--------------------|-------|----------|----------|---------------------|------|
| TC1400001184.mm.1 | 1,78                                             | JUC1400004966.mm.1 | -2,12 | 0,033514 | 0,523077 |                     |      |
| TC1400001184.mm.1 | 1,78                                             | PSR1400009273.mm.1 | -2,24 | 0,009276 | 0,414791 | Cassette Exon       | 0,12 |
| TC1400001184.mm.1 | 1,78                                             | JUC1400004969.mm.1 | -2,5  | 0,031769 | 0,517539 |                     |      |
| TC1400001184.mm.1 | 1,78                                             | PSR1400009296.mm.1 | -2,52 | 0,009705 | 0,417765 | Alternative 5' Donc | 0,19 |
| TC1400001184.mm.1 | 1,78                                             | PSR1400009277.mm.1 | -2,53 | 0,00143  | 0,327447 | Cassette Exon       | 0,17 |
| TC1400001184.mm.1 | 1,78                                             | PSR1400009295.mm.1 | -2,55 | 0,029581 | 0,510459 | Alternative 5' Donc | 0,19 |
| TC1400001184.mm.1 | 1,78                                             | JUC1400004974.mm.1 | -3,73 | 0,007916 | 0,403819 |                     |      |
| TC0600003417.mm.1 | 1,35 Kras                                        | PSR0600026935.mm.1 | -2,01 | 0,025689 | 0,498173 | Cassette Exon       | 0,18 |
| TC0600003417.mm.1 | 1,35 Kras                                        | JUC0600014130.mm.1 | -2,32 | 0,010841 | 0,424161 |                     |      |
| TC1200000016.mm.1 | 1,41 Dnmt3a                                      | JUC1200000119.mm.1 | -2,01 | 0,016684 | 0,460085 |                     |      |
| TC1200000016.mm.1 | 1,41 Dnmt3a                                      | PSR1200000206.mm.1 | -2,21 | 0,010483 | 0,421891 | Cassette Exon       | 0,12 |
| TC1200000016.mm.1 | 1,41 Dnmt3a                                      | JUC1200000128.mm.1 | -2,23 | 0,035262 | 0,52837  |                     |      |
| TC1200000016.mm.1 | 1,41 Dnmt3a                                      | PSR1200000208.mm.1 | -3,07 | 0,031353 | 0,516297 | Alternative 5' Donc | 0,18 |
| TC1800001529.mm.1 | -1,09                                            | PSR1800011211.mm.1 | -2,01 | 0,002195 | 0,344814 | Alternative 5' Donc | 0,17 |
| TC0200004802.mm.1 | -1,15 Foxa2                                      | PSR0200041040.mm.1 | -2,01 | 0,010004 | 0,418553 | Alternative 5' Donc | 0,16 |
| TC0700002828.mm.1 | 1,48 Gpi1                                        | PSR0700025274.mm.1 | -2,01 | 0,002119 | 0,342919 | Alternative 3' Acce | 0,11 |
| TC0700002828.mm.1 | 1,48 Gpi1                                        | PSR0700025301.mm.1 | -2,8  | 0,000897 | 0,313363 | Cassette Exon       | 0,16 |
| TC1500001720.mm.1 | 1,05 Ly6k                                        | PSR1500012981.mm.1 | -2,01 | 0,00833  | 0,406336 | Alternative 5' Donc | 0,16 |
| TC1500001720.mm.1 | 1,05 Ly6k                                        | JUC1500007374.mm.1 | -2,29 | 0,011775 | 0,430069 |                     |      |
| TC1700000362.mm.1 | 1,09 Clcn7                                       | PSR1700002968.mm.1 | -2,01 | 0,006172 | 0,387873 | Alternative 3' Acce | 0,16 |
| TC1700000362.mm.1 | 1,09 Clcn7                                       | JUC1700001599.mm.1 | -2,62 | 0,04358  | 0,550052 |                     |      |
| TC1400001074.mm.1 | -1,09 1700108F19Rik                              | PSR1400008643.mm.1 | -2,01 | 0,017206 | 0,462491 | Alternative 5' Donc | 0,15 |
| TC1600000479.mm.1 | 1,03 Muc13                                       | PSR1600004527.mm.1 | -2,01 | 0,001574 | 0,331411 | Alternative 3' Acce | 0,15 |
| TC1900000617.mm.1 | 1,44 R3hcc1                                      | PSR1900005541.mm.1 | -2,01 | 0,049576 | 0,563357 | Alternative 5' Donc | 0,15 |
| TC0100003302.mm.1 | 1,55 BC034090                                    | PSR0100026877.mm.1 | -2,01 | 0,015341 | 0,453763 | Alternative 3' Acce | 0,13 |
| TC0100003302.mm.1 | 1,55 BC034090                                    | JUC0100015359.mm.1 | -2,58 | 0,002493 | 0,349135 |                     |      |
| TC0200002352.mm.1 | 1,24 Raly; a                                     | PSR0200018695.mm.1 | -2,01 | 0,025588 | 0,497808 | Alternative 3' Acce | 0,05 |
| TC0200002352.mm.1 | 1,24 Raly; a                                     | JUC0200009484.mm.1 | -2,17 | 0,007463 | 0,400381 |                     |      |
| TC0200002352.mm.1 | 1,24 Raly; a                                     | PSR0200018747.mm.1 | -2,4  | 0,015632 | 0,455509 | Cassette Exon       | 0,13 |
| TC0200002352.mm.1 | 1,24 Raly; a                                     | PSR0200018737.mm.1 | -2,64 | 0,025627 | 0,497926 | Alternative 3' Acce | 0,05 |
| TC1000000142.mm.1 | 1,07 Ifngr1                                      | PSR1000000990.mm.1 | -2,01 | 0,004242 | 0,363295 | Alternative 5' Donc | 0,13 |
| TC1000000142.mm.1 | 1,07 Ifngr1                                      | JUC1000000498.mm.1 | -3,11 | 0,033037 | 0,521501 |                     |      |
| TC1800001469.mm.1 | -1,06 Alpk2                                      | PSR1800010854.mm.1 | -2,01 | 0,043121 | 0,548644 | Cassette Exon       | 0,12 |
| TC1900000953.mm.1 | 1,67 Klc2                                        | PSR1900008436.mm.1 | -2,01 | 0,029916 | 0,511499 | Alternative 5' Donc | 0,12 |
| TC1900000953.mm.1 | 1,67 Klc2                                        | JUC1900004626.mm.1 | -2,73 | 0,041508 | 0,544746 |                     |      |
| TC1600000099.mm.1 | 1,38 1810013L24Rik                               | PSR1600000693.mm.1 | -2,01 | 0,029181 | 0,509333 | Alternative 5' Donc | 0,12 |
| TC0500000347.mm.1 | 1,32 Depdc5                                      | JUC0500001783.mm.1 | -2,01 | 0,022518 | 0,487114 |                     |      |
| TC0500000347.mm.1 | 1,32 Depdc5                                      | PSR0500003208.mm.1 | -2,12 | 0,007209 | 0,398121 | Alternative 5' Donc | 0,11 |
| TC0600002353.mm.1 | 1,59 Pyurf; Gm26712; PYURF; F JUC0600009582.mm.1 |                    | -2,01 | 0,031577 | 0,517177 |                     |      |
| TC0600002353.mm.1 | 1,59 Pyurf; Gm26712; PYURF; F PSR0600018352.mm.1 |                    | -2,09 | 0,007916 | 0,403819 | Alternative 3' Acce | 0,11 |
| TC0600002353.mm.1 | 1,59 Pyurf; Gm26712; PYURF; F JUC0600009581.mm.1 |                    | -5,73 | 0,00467  | 0,370181 |                     |      |
| TC0X00001520.mm.1 | 1,43 Phf8                                        | PSR0X00009526.mm.1 | -2,01 | 0,004312 | 0,364152 | Cassette Exon       | 0,11 |
| TC1300002717.mm.1 | -1 Itga1; Pelo                                   | PSR1300018375.mm.1 | -2,01 | 0,040395 | 0,541998 | Cassette Exon       | 0,11 |
| TC1300002717.mm.1 | -1 Itga1; Pelo                                   | JUC1300009878.mm.1 | -2,09 | 0,005263 | 0,377955 |                     |      |
| TC1300002717.mm.1 | -1 Itga1; Pelo                                   | PSR1300018381.mm.1 | -2,68 | 0,029697 | 0,510949 | Cassette Exon       | 0,1  |
| TC0400003722.mm.1 | 1,18 Dhdds                                       | PSR0400030564.mm.1 | -2,01 | 0,014602 | 0,449914 | Alternative 5' Donc | 0,1  |
| TC0400003722.mm.1 | 1,18 Dhdds                                       | PSR0400030553.mm.1 | -2,09 | 0,007387 | 0,399541 | Alternative 3' Acce | 0,05 |
| TC0700003641.mm.1 | 1,17 Il16                                        | PSR0700030942.mm.1 | -2,01 | 0,001336 | 0,325349 | Cassette Exon       | 0,1  |

|                   |                    |                    |       |          |                        |      |
|-------------------|--------------------|--------------------|-------|----------|------------------------|------|
| TC1700001839.mm.1 | 1,93 Akap8l        | PSR1700016968.mm.1 | -2,01 | 0,019622 | 0,47483 Cassette Exon  | 0,1  |
| TC0100001451.mm.1 | -1,1 4930523C07Rik | PSR0100011887.mm.1 | -2,01 | 0,043686 | 0,550236 Cassette Exon | 0,09 |
| TC0400000377.mm.1 | 1,03 Dnaic1        | PSR0400002325.mm.1 | -2,01 | 0,043409 | 0,549603 Cassette Exon | 0,09 |
| TC1200000741.mm.1 | 1,24 Slc39a9       | PSR1200005239.mm.1 | -2,01 | 0,004723 | 0,370888 Cassette Exon | 0,09 |
| TC1300000089.mm.1 | 1,16 Lyst          | PSR1300000644.mm.1 | -2,01 | 0,034699 | 0,526311 Cassette Exon | 0,09 |
| TC1500001946.mm.1 | -1,04 Cyp2d10      | PSR1500015341.mm.1 | -2,01 | 0,049347 | 0,562803 Cassette Exon | 0,09 |
| TC0100001397.mm.1 | -1,02 Stx6         | PSR0100011534.mm.1 | -2,01 | 0,03247  | 0,519631 Cassette Exon | 0,08 |
| TC1700000279.mm.1 | 1,02 Zfp229        | JUC1700002097.mm.1 | -2,01 | 0,005548 | 0,380679 Cassette Exon | 0,07 |
| TC0600002936.mm.1 | 1,66 Atp2b2        | JUC0600011694.mm.1 | -2,01 | 0,014196 | 0,447628               |      |
| TC0600002936.mm.1 | 1,66 Atp2b2        | PSR0600022579.mm.1 | -2,16 | 0,011534 | 0,428564 Cassette Exon | 0,05 |
| TC0600002936.mm.1 | 1,66 Atp2b2        | JUC0600011712.mm.1 | -2,16 | 0,007337 | 0,399094               |      |
| TC0600002936.mm.1 | 1,66 Atp2b2        | JUC0600011688.mm.1 | -4,28 | 0,032953 | 0,52122                |      |
| TC1600002039.mm.1 | 1,02 Tiam1         | PSR1600015629.mm.1 | -2,01 | 0,027263 | 0,503682 Cassette Exon | 0,02 |
| TC1400000269.mm.1 | -1,05 Il17rd       | JUC1400001307.mm.1 | -2,01 | 0,026591 | 0,501731               |      |
| TC0300000287.mm.1 | 1,28 4930594O21Rik | PSR0300002076.mm.1 | -2,01 | 0,002641 | 0,349612               |      |
| TC0300000287.mm.1 | 1,28 4930594O21Rik | JUC0300001072.mm.1 | -2,17 | 0,035653 | 0,528956               |      |
| TC0300000287.mm.1 | 1,28 4930594O21Rik | JUC0300001069.mm.1 | -2,41 | 0,031173 | 0,515739               |      |
| TC0100002319.mm.1 | -1,18 Nab1         | JUC0100010568.mm.1 | -2,01 | 0,039203 | 0,538692               |      |
| TC1900000994.mm.1 | -1,08 Slc22a20     | JUC1900004979.mm.1 | -2,01 | 0,023603 | 0,490995               |      |
| TC1900000994.mm.1 | -1,08 Slc22a20     | JUC1900004982.mm.1 | -2,29 | 0,009748 | 0,417839               |      |
| TC0100000427.mm.1 | 1,01 Aox1          | JUC0100001928.mm.1 | -2,01 | 0,040614 | 0,542549               |      |
| TC0100000427.mm.1 | 1,01 Aox1          | JUC0100001917.mm.1 | -2,84 | 0,045396 | 0,554085               |      |
| TC1900000040.mm.1 | -1,22 Pcx          | JUC1900000278.mm.1 | -2,01 | 0,022284 | 0,486046               |      |
| TC1500002192.mm.1 | -1,05 Kmt2d        | JUC1500010209.mm.1 | -2,01 | 0,013496 | 0,443238               |      |
| TC1500000417.mm.1 | 1,13 D15Erttd621e  | JUC1500001710.mm.1 | -2,01 | 0,049147 | 0,562349               |      |
| TC1500000037.mm.1 | -1,7 Fyb; Gm7666   | JUC1500000187.mm.1 | -2,01 | 0,002181 | 0,344453               |      |
| TC0200000456.mm.1 | -1,35 Gm2240       | JUC0200001403.mm.1 | -2,01 | 0,010611 | 0,422786               |      |
| TC0800003235.mm.1 | 1,17 Znrf1         | JUC0800006021.mm.1 | -2,01 | 0,035554 | 0,528764               |      |
| TC0800003235.mm.1 | 1,17 Znrf1         | JUC0800006022.mm.1 | -2,29 | 0,033354 | 0,522553               |      |
| TC0800000059.mm.1 | 1,18               | JUC0800000282.mm.1 | -2,01 | 0,038313 | 0,536167               |      |
| TC0700004332.mm.1 | 1,13 Gm166         | JUC0700019189.mm.1 | -2,01 | 0,000528 | 0,304044               |      |
| TC0900001409.mm.1 | 1,48 Usp19         | JUC0900006263.mm.1 | -2,01 | 0,017306 | 0,463271               |      |
| TC0600000724.mm.1 | -1,1 Mmnrn1        | JUC0600002800.mm.1 | -2,01 | 0,032715 | 0,520439               |      |
| TC0600001942.mm.1 | 1,03 Iqub          | JUC0600007975.mm.1 | -2,01 | 0,002098 | 0,342919               |      |
| TC0700003002.mm.1 | 1,35 Ppfia3        | JUC0700014496.mm.1 | -2,01 | 0,031747 | 0,517489               |      |
| TC0700002763.mm.1 | 1,11 Arhgap33      | JUC0700013117.mm.1 | -2,01 | 0,017479 | 0,463933               |      |
| TC0700003991.mm.1 | 1,03 Dchs1         | JUC0700017530.mm.1 | -2,01 | 0,033744 | 0,523558               |      |
| TC0700003566.mm.1 | -1,02 Kif7         | JUC0700015897.mm.1 | -2,01 | 0,007301 | 0,398847               |      |
| TC0700003599.mm.1 | 1,16 Wdr73         | JUC0700016151.mm.1 | -2,01 | 0,026822 | 0,502373               |      |
| TC0700003599.mm.1 | 1,16 Wdr73         | JUC0700016160.mm.1 | -2,44 | 0,041292 | 0,544227               |      |
| TC0700001372.mm.1 | -1,01 Prkrir       | JUC0700006031.mm.1 | -2,01 | 0,040145 | 0,541609               |      |
| TC1100002492.mm.1 | -1,02 Gabrp        | JUC1100012071.mm.1 | -2,01 | 0,022491 | 0,487114               |      |
| TC1100003600.mm.1 | -1,17 Abi3         | JUC1100017278.mm.1 | -2,01 | 0,016407 | 0,458907               |      |
| TC1100003342.mm.1 | 1,3 5730455P16Rik  | JUC1100016072.mm.1 | -2,01 | 0,024366 | 0,49362                |      |
| TC1100001476.mm.1 | 1,28 4833417C18Rik | JUC1100007172.mm.1 | -2,01 | 0,002711 | 0,349612               |      |
| TC1100001227.mm.1 | 1,07 Gm11426       | JUC1100006031.mm.1 | -2,01 | 0,018135 | 0,467325               |      |
| TC0400001999.mm.1 | 1,31               | PSR0400016322.mm.1 | -2,01 | 0,018608 | 0,469665               |      |
| TC1000000753.mm.1 | -1 Pofut2          | JUC1000002989.mm.1 | -2,01 | 0,020386 | 0,477737               |      |



|                   |      |         |                    |        |          |          |                          |
|-------------------|------|---------|--------------------|--------|----------|----------|--------------------------|
| TC0400002642.mm.1 | 1,13 | Grin3a  | JUC0400011148.mm.1 | -2,01  | 0,044147 | 0,551024 |                          |
| TC0400002642.mm.1 | 1,13 | Grin3a  | JUC0400011146.mm.1 | -3,5   | 0,004681 | 0,370323 |                          |
| TC0X00003369.mm.1 | 1,86 |         | JUC0X00010617.mm.1 | -2,01  | 0,021202 | 0,48113  |                          |
| TC1400002168.mm.1 | 6,09 | Atp8a2  | PSR1400016785.mm.1 | -2,02  | 0,034135 | 0,524882 | Cassette Exon 0,13       |
| TC1400002168.mm.1 | 6,09 | Atp8a2  | JUC1400009199.mm.1 | -2,03  | 0,015887 | 0,456526 |                          |
| TC1400002168.mm.1 | 6,09 | Atp8a2  | PSR1400016789.mm.1 | -2,07  | 0,027551 | 0,504437 | Cassette Exon 0,08       |
| TC1400002168.mm.1 | 6,09 | Atp8a2  | PSR1400016784.mm.1 | -2,08  | 0,020948 | 0,479982 | Cassette Exon 0,15       |
| TC1400002168.mm.1 | 6,09 | Atp8a2  | PSR1400016776.mm.1 | -2,2   | 0,024201 | 0,493294 | Cassette Exon 0,23       |
| TC1400002168.mm.1 | 6,09 | Atp8a2  | PSR1400016805.mm.1 | -2,21  | 0,01122  | 0,426684 | Alternative 3' Acce 0,2  |
| TC1400002168.mm.1 | 6,09 | Atp8a2  | PSR1400016807.mm.1 | -2,21  | 0,040481 | 0,542144 | Cassette Exon 0,13       |
| TC1400002168.mm.1 | 6,09 | Atp8a2  | PSR1400016783.mm.1 | -2,33  | 0,002696 | 0,349612 | Cassette Exon 0,22       |
| TC1400002168.mm.1 | 6,09 | Atp8a2  | PSR1400016796.mm.1 | -2,4   | 0,001953 | 0,340561 | Cassette Exon 0,16       |
| TC1400002168.mm.1 | 6,09 | Atp8a2  | PSR1400016802.mm.1 | -2,67  | 0,017867 | 0,466232 | Cassette Exon 0,3        |
| TC1400002168.mm.1 | 6,09 | Atp8a2  | PSR1400016795.mm.1 | -2,83  | 0,009005 | 0,412255 | Cassette Exon 0,15       |
| TC1400002168.mm.1 | 6,09 | Atp8a2  | JUC1400009173.mm.1 | -2,88  | 0,00956  | 0,416915 |                          |
| TC1400002168.mm.1 | 6,09 | Atp8a2  | PSR1400016782.mm.1 | -2,93  | 0,002557 | 0,349501 | Cassette Exon 0,4        |
| TC1400002168.mm.1 | 6,09 | Atp8a2  | JUC1400009189.mm.1 | -3,32  | 0,016377 | 0,458693 |                          |
| TC1400002168.mm.1 | 6,09 | Atp8a2  | PSR1400016780.mm.1 | -3,36  | 0,020159 | 0,477086 | Cassette Exon 0,49       |
| TC1400002168.mm.1 | 6,09 | Atp8a2  | JUC1400009198.mm.1 | -3,38  | 0,042983 | 0,548405 |                          |
| TC1400002168.mm.1 | 6,09 | Atp8a2  | JUC1400009200.mm.1 | -3,43  | 0,017064 | 0,462011 |                          |
| TC1400002168.mm.1 | 6,09 | Atp8a2  | PSR1400016827.mm.1 | -4,22  | 0,009926 | 0,418378 | Cassette Exon 0,41       |
| TC1400002168.mm.1 | 6,09 | Atp8a2  | PSR1400016811.mm.1 | -4,42  | 0,006998 | 0,395737 | Cassette Exon 0,25       |
| TC1400002168.mm.1 | 6,09 | Atp8a2  | PSR1400016826.mm.1 | -4,42  | 0,006794 | 0,393554 | Cassette Exon 0,07       |
| TC1400002168.mm.1 | 6,09 | Atp8a2  | PSR1400016790.mm.1 | -4,56  | 0,020341 | 0,477323 | Cassette Exon 0,41       |
| TC1400002168.mm.1 | 6,09 | Atp8a2  | PSR1400016799.mm.1 | -4,87  | 0,00003  | 0,229631 | Cassette Exon 0,52       |
| TC1400002168.mm.1 | 6,09 | Atp8a2  | JUC1400009190.mm.1 | -4,91  | 0,000016 | 0,19183  |                          |
| TC1400002168.mm.1 | 6,09 | Atp8a2  | PSR1400016822.mm.1 | -5,14  | 0,002713 | 0,349612 | Cassette Exon 0,07       |
| TC1400002168.mm.1 | 6,09 | Atp8a2  | JUC1400009193.mm.1 | -5,31  | 0,013658 | 0,444386 |                          |
| TC1400002168.mm.1 | 6,09 | Atp8a2  | PSR1400016778.mm.1 | -5,81  | 0,000558 | 0,304044 | Cassette Exon 0,32       |
| TC1400002168.mm.1 | 6,09 | Atp8a2  | PSR1400016821.mm.1 | -5,82  | 0,002739 | 0,349612 | Cassette Exon 0,21       |
| TC1400002168.mm.1 | 6,09 | Atp8a2  | PSR1400016823.mm.1 | -6,32  | 0,010179 | 0,419711 | Alternative 3' Acce 0,32 |
| TC1400002168.mm.1 | 6,09 | Atp8a2  | JUC1400009172.mm.1 | -6,6   | 0,026136 | 0,499937 |                          |
| TC1400002168.mm.1 | 6,09 | Atp8a2  | PSR1400016779.mm.1 | -6,8   | 0,00066  | 0,304044 | Cassette Exon 0,45       |
| TC1400002168.mm.1 | 6,09 | Atp8a2  | PSR1400016820.mm.1 | -6,85  | 0,001855 | 0,337479 | Alternative 5' Donc 0,26 |
| TC1400002168.mm.1 | 6,09 | Atp8a2  | JUC1400009171.mm.1 | -7,15  | 0,004933 | 0,373093 |                          |
| TC1400002168.mm.1 | 6,09 | Atp8a2  | JUC1400009209.mm.1 | -7,96  | 0,003963 | 0,359922 |                          |
| TC1400002168.mm.1 | 6,09 | Atp8a2  | PSR1400016819.mm.1 | -8,05  | 0,002263 | 0,34578  | Alternative 5' Donc 0,26 |
| TC1400002168.mm.1 | 6,09 | Atp8a2  | PSR1400016825.mm.1 | -10,68 | 0,018416 | 0,468484 | Cassette Exon 0,07       |
| TC1400002168.mm.1 | 6,09 | Atp8a2  | JUC1400009181.mm.1 | -10,71 | 0,000688 | 0,304792 |                          |
| TC1400002168.mm.1 | 6,09 | Atp8a2  | JUC1400009207.mm.1 | -12,97 | 0,003157 | 0,353892 |                          |
| TC1400002168.mm.1 | 6,09 | Atp8a2  | JUC1400009206.mm.1 | -13,04 | 0,022943 | 0,488667 |                          |
| TC1400002168.mm.1 | 6,09 | Atp8a2  | JUC1400009205.mm.1 | -17,29 | 0,0021   | 0,342919 |                          |
| TC1100000235.mm.1 | 6,65 | Fam161a | PSR1100001920.mm.1 | -2,02  | 0,023492 | 0,490754 | Cassette Exon 0,07       |
| TC1100000235.mm.1 | 6,65 | Fam161a | PSR1100001912.mm.1 | -2,31  | 0,040035 | 0,54131  | Cassette Exon 0,25       |
| TC1100000235.mm.1 | 6,65 | Fam161a | PSR1100001926.mm.1 | -2,33  | 0,003071 | 0,353892 | Cassette Exon 0,26       |
| TC1100000235.mm.1 | 6,65 | Fam161a | PSR1100001913.mm.1 | -3,17  | 0,018781 | 0,470789 | Cassette Exon 0,29       |
| TC1100000235.mm.1 | 6,65 | Fam161a | PSR1100001910.mm.1 | -3,88  | 0,007648 | 0,402193 | Cassette Exon 0,07       |
| TC1100000235.mm.1 | 6,65 | Fam161a | PSR1100001918.mm.1 | -4,85  | 0,025689 | 0,498173 | Alternative 3' Acce 0,48 |

|                   |              |                    |        |          |          |                          |
|-------------------|--------------|--------------------|--------|----------|----------|--------------------------|
| TC1100000235.mm.1 | 6,65 Fam161a | JUC1100000989.mm.1 | -5,61  | 0,010077 | 0,418974 |                          |
| TC1100000235.mm.1 | 6,65 Fam161a | JUC1100000984.mm.1 | -5,74  | 0,009732 | 0,417839 |                          |
| TC1100000235.mm.1 | 6,65 Fam161a | PSR1100001911.mm.1 | -7,53  | 0,0006   | 0,304044 | Cassette Exon 0,21       |
| TC1100000235.mm.1 | 6,65 Fam161a | PSR1100001909.mm.1 | -8,67  | 0,001548 | 0,330631 | Cassette Exon 0,07       |
| TC1100000235.mm.1 | 6,65 Fam161a | JUC1100000985.mm.1 | -9,05  | 0,000203 | 0,28803  |                          |
| TC1100000235.mm.1 | 6,65 Fam161a | JUC1100000981.mm.1 | -10,25 | 0,011779 | 0,430069 |                          |
| TC1100000235.mm.1 | 6,65 Fam161a | JUC1100000987.mm.1 | -12,85 | 0,002514 | 0,349406 |                          |
| TC1100000235.mm.1 | 6,65 Fam161a | PSR1100001908.mm.1 | -19,89 | 0,000432 | 0,297771 | Cassette Exon 0,41       |
| TC0400000585.mm.1 | 3,73 Fsd1l   | JUC0400002130.mm.1 | -2,02  | 0,036324 | 0,530547 |                          |
| TC0400000585.mm.1 | 3,73 Fsd1l   | JUC0400002122.mm.1 | -2,16  | 0,032238 | 0,51899  |                          |
| TC0400000585.mm.1 | 3,73 Fsd1l   | PSR0400004278.mm.1 | -2,28  | 0,011374 | 0,427487 | Cassette Exon 0,16       |
| TC0400000585.mm.1 | 3,73 Fsd1l   | PSR0400004275.mm.1 | -2,86  | 0,014783 | 0,45081  | Cassette Exon 0,25       |
| TC0400000585.mm.1 | 3,73 Fsd1l   | PSR0400004265.mm.1 | -2,93  | 0,004986 | 0,373851 | Alternative 5' Donc 0,25 |
| TC0400000585.mm.1 | 3,73 Fsd1l   | PSR0400004257.mm.1 | -2,94  | 0,00675  | 0,393343 | Cassette Exon 0,18       |
| TC0400000585.mm.1 | 3,73 Fsd1l   | PSR0400004260.mm.1 | -3,05  | 0,000206 | 0,28803  | Cassette Exon 0,18       |
| TC0400000585.mm.1 | 3,73 Fsd1l   | JUC0400002134.mm.1 | -4,32  | 0,017735 | 0,465216 |                          |
| TC0400000585.mm.1 | 3,73 Fsd1l   | JUC0400002132.mm.1 | -4,97  | 0,002265 | 0,34578  |                          |
| TC0400000585.mm.1 | 3,73 Fsd1l   | PSR0400004261.mm.1 | -4,98  | 0,006068 | 0,386691 | Cassette Exon 0,29       |
| TC0400000585.mm.1 | 3,73 Fsd1l   | PSR0400004277.mm.1 | -5,96  | 0,001446 | 0,328226 | Cassette Exon 0,41       |
| TC0400000585.mm.1 | 3,73 Fsd1l   | JUC0400002131.mm.1 | -6,01  | 0,002378 | 0,348561 |                          |
| TC0900002435.mm.1 | 2,59 Lrrc49  | PSR0900020452.mm.1 | -2,02  | 0,018224 | 0,46765  | Alternative 5' Donc 0,15 |
| TC0900002435.mm.1 | 2,59 Lrrc49  | JUC0900011522.mm.1 | -2,12  | 0,041688 | 0,545356 |                          |
| TC0900002435.mm.1 | 2,59 Lrrc49  | PSR0900020437.mm.1 | -2,35  | 0,028707 | 0,508054 | Alternative 5' Donc 0,2  |
| TC0900002435.mm.1 | 2,59 Lrrc49  | PSR0900020448.mm.1 | -2,64  | 0,009996 | 0,418456 | Cassette Exon 0,19       |
| TC0900002435.mm.1 | 2,59 Lrrc49  | PSR0900020422.mm.1 | -2,82  | 0,003695 | 0,357266 | Alternative 3' Acce 0,27 |
| TC0900002435.mm.1 | 2,59 Lrrc49  | PSR0900020430.mm.1 | -3,2   | 0,028655 | 0,507969 | Alternative 3' Acce 0,35 |
| TC0900002435.mm.1 | 2,59 Lrrc49  | PSR0900020449.mm.1 | -3,31  | 0,021078 | 0,480371 | Cassette Exon 0,19       |
| TC0900002435.mm.1 | 2,59 Lrrc49  | JUC0900011517.mm.1 | -4,04  | 0,005311 | 0,378059 |                          |
| TC0900002435.mm.1 | 2,59 Lrrc49  | PSR0900020418.mm.1 | -4,74  | 0,002213 | 0,34564  | Alternative 3' Acce 0,38 |
| TC0200002894.mm.1 | 1,99 Celf2   | PSR0200024067.mm.1 | -2,02  | 0,028031 | 0,505851 | Intron Retention 0,09    |
| TC0200002894.mm.1 | 1,99 Celf2   | PSR0200024104.mm.1 | -2,06  | 0,016105 | 0,457698 | Cassette Exon 0,24       |
| TC0200002894.mm.1 | 1,99 Celf2   | PSR0200024122.mm.1 | -2,11  | 0,024118 | 0,49322  | Cassette Exon 0,1        |
| TC0200002894.mm.1 | 1,99 Celf2   | PSR0200024110.mm.1 | -2,13  | 0,006853 | 0,393893 | Cassette Exon 0,19       |
| TC0200002894.mm.1 | 1,99 Celf2   | PSR0200024072.mm.1 | -2,16  | 0,003731 | 0,357586 |                          |
| TC0200002894.mm.1 | 1,99 Celf2   | PSR0200024058.mm.1 | -2,24  | 0,042931 | 0,548271 | Cassette Exon 0,24       |
| TC0200002894.mm.1 | 1,99 Celf2   | JUC0200012176.mm.1 | -2,32  | 0,00921  | 0,41403  |                          |
| TC0200002894.mm.1 | 1,99 Celf2   | PSR0200024088.mm.1 | -2,37  | 0,027068 | 0,502979 | Alternative 5' Donc 0,13 |
| TC0200002894.mm.1 | 1,99 Celf2   | PSR0200024111.mm.1 | -2,41  | 0,009862 | 0,417945 | Cassette Exon 0,19       |
| TC0200002894.mm.1 | 1,99 Celf2   | PSR0200024041.mm.1 | -2,49  | 0,003347 | 0,354243 | Alternative 3' Acce 0,12 |
| TC0200002894.mm.1 | 1,99 Celf2   | PSR0200024109.mm.1 | -2,54  | 0,023977 | 0,492725 | Cassette Exon 0,2        |
| TC0200002894.mm.1 | 1,99 Celf2   | PSR0200024098.mm.1 | -2,56  | 0,013995 | 0,446353 | Alternative 3' Acce 0,2  |
| TC0200002894.mm.1 | 1,99 Celf2   | JUC0200012172.mm.1 | -2,6   | 0,04489  | 0,55271  |                          |
| TC0200002894.mm.1 | 1,99 Celf2   | PSR0200024114.mm.1 | -2,67  | 0,001696 | 0,335395 | Cassette Exon 0,23       |
| TC0200002894.mm.1 | 1,99 Celf2   | PSR0200024091.mm.1 | -2,72  | 0,049851 | 0,563773 | Cassette Exon 0,2        |
| TC0200002894.mm.1 | 1,99 Celf2   | PSR0200024116.mm.1 | -2,81  | 0,006996 | 0,395737 | Cassette Exon 0,23       |
| TC0200002894.mm.1 | 1,99 Celf2   | PSR0200024120.mm.1 | -2,88  | 0,015967 | 0,456885 | Cassette Exon 0,19       |
| TC0200002894.mm.1 | 1,99 Celf2   | JUC0200012184.mm.1 | -2,88  | 0,020562 | 0,478336 |                          |
| TC0200002894.mm.1 | 1,99 Celf2   | JUC0200012190.mm.1 | -3,01  | 0,034688 | 0,526294 |                          |

|                   |              |                    |       |          |                              |      |
|-------------------|--------------|--------------------|-------|----------|------------------------------|------|
| TC0200002894.mm.1 | 1,99 Celf2   | PSR0200024118.mm.1 | -3,02 | 0,013297 | 0,44174 Cassette Exon        | 0,17 |
| TC0200002894.mm.1 | 1,99 Celf2   | PSR0200024095.mm.1 | -3,08 | 0,010757 | 0,423859 Alternative 3' Acce | 0,2  |
| TC0200002894.mm.1 | 1,99 Celf2   | JUC0200012185.mm.1 | -3,1  | 0,000835 | 0,311886                     |      |
| TC0200002894.mm.1 | 1,99 Celf2   | JUC0200012181.mm.1 | -3,16 | 0,002875 | 0,352207                     |      |
| TC0200002894.mm.1 | 1,99 Celf2   | PSR0200024063.mm.1 | -3,21 | 0,002375 | 0,34829 Cassette Exon        | 0,2  |
| TC0200002894.mm.1 | 1,99 Celf2   | PSR0200024100.mm.1 | -3,25 | 0,035632 | 0,528956 Alternative 5' Donc | 0,35 |
| TC0200002894.mm.1 | 1,99 Celf2   | PSR0200024119.mm.1 | -3,28 | 0,000255 | 0,28803 Cassette Exon        | 0,21 |
| TC0200002894.mm.1 | 1,99 Celf2   | PSR0200024089.mm.1 | -3,29 | 0,010473 | 0,421857 Alternative 5' Donc | 0,13 |
| TC0200002894.mm.1 | 1,99 Celf2   | JUC0200012186.mm.1 | -4,65 | 0,00129  | 0,322541                     |      |
| TC1100000863.mm.1 | 4,51 Gm12302 | PSR1100007148.mm.1 | -2,02 | 0,000751 | 0,308185 Cassette Exon       | 0,27 |
| TC1100000863.mm.1 | 4,51 Gm12302 | JUC1100003776.mm.1 | -2,62 | 0,01063  | 0,422841                     |      |
| TC1100000863.mm.1 | 4,51 Gm12302 | PSR1100007154.mm.1 | -2,84 | 0,03403  | 0,524517 Alternative 5' Donc | 0,23 |
| TC1100000863.mm.1 | 4,51 Gm12302 | PSR1100007152.mm.1 | -3,17 | 0,009079 | 0,412827 Alternative 3' Acce | 0,28 |
| TC1100000863.mm.1 | 4,51 Gm12302 | PSR1100007146.mm.1 | -4,77 | 0,004776 | 0,371044 Cassette Exon       | 0,35 |
| TC1100000863.mm.1 | 4,51 Gm12302 | PSR1100007147.mm.1 | -4,95 | 0,007405 | 0,399876 Cassette Exon       | 0,3  |
| TC1100000863.mm.1 | 4,51 Gm12302 | JUC1100003780.mm.1 | -4,98 | 0,004195 | 0,36298                      |      |
| TC1100000880.mm.1 | 2,15 Myh10   | JUC1100003894.mm.1 | -2,02 | 0,03291  | 0,521149                     |      |
| TC1100000880.mm.1 | 2,15 Myh10   | PSR1100007313.mm.1 | -2,08 | 0,028012 | 0,505851 Alternative 3' Acce | 0,14 |
| TC1100000880.mm.1 | 2,15 Myh10   | JUC1100003891.mm.1 | -2,08 | 0,006912 | 0,394898                     |      |
| TC1100000880.mm.1 | 2,15 Myh10   | JUC1100003893.mm.1 | -2,08 | 0,012574 | 0,435847                     |      |
| TC1100000880.mm.1 | 2,15 Myh10   | JUC1100003902.mm.1 | -2,12 | 0,015891 | 0,456526                     |      |
| TC1100000880.mm.1 | 2,15 Myh10   | PSR1100007321.mm.1 | -2,16 | 0,031961 | 0,518173 Cassette Exon       | 0,17 |
| TC1100000880.mm.1 | 2,15 Myh10   | PSR1100007342.mm.1 | -2,19 | 0,01326  | 0,441506 Cassette Exon       | 0,09 |
| TC1100000880.mm.1 | 2,15 Myh10   | PSR1100007362.mm.1 | -2,2  | 0,015409 | 0,453996 Cassette Exon       | 0,21 |
| TC1100000880.mm.1 | 2,15 Myh10   | JUC1100003885.mm.1 | -2,2  | 0,026219 | 0,500082                     |      |
| TC1100000880.mm.1 | 2,15 Myh10   | JUC1100003900.mm.1 | -2,26 | 0,009678 | 0,417605                     |      |
| TC1100000880.mm.1 | 2,15 Myh10   | PSR1100007315.mm.1 | -2,27 | 0,013326 | 0,441836 Alternative 3' Acce | 0,15 |
| TC1100000880.mm.1 | 2,15 Myh10   | PSR1100007368.mm.1 | -2,27 | 0,006313 | 0,389263 Cassette Exon       | 0,13 |
| TC1100000880.mm.1 | 2,15 Myh10   | PSR1100007319.mm.1 | -2,6  | 0,026559 | 0,501513 Cassette Exon       | 0,12 |
| TC1100000880.mm.1 | 2,15 Myh10   | PSR1100007366.mm.1 | -2,67 | 0,046979 | 0,557653 Cassette Exon       | 0,16 |
| TC1100000880.mm.1 | 2,15 Myh10   | JUC1100003903.mm.1 | -2,83 | 0,043863 | 0,550501                     |      |
| TC1100000880.mm.1 | 2,15 Myh10   | JUC1100003889.mm.1 | -2,87 | 0,036872 | 0,532257                     |      |
| TC1100000880.mm.1 | 2,15 Myh10   | JUC1100003901.mm.1 | -2,91 | 0,000602 | 0,304044                     |      |
| TC1100000880.mm.1 | 2,15 Myh10   | PSR1100007339.mm.1 | -3,04 | 0,019052 | 0,471978 Cassette Exon       | 0,2  |
| TC1100000880.mm.1 | 2,15 Myh10   | PSR1100007322.mm.1 | -3,51 | 0,01206  | 0,432426 Cassette Exon       | 0,17 |
| TC1100000880.mm.1 | 2,15 Myh10   | PSR1100007365.mm.1 | -4,16 | 0,01369  | 0,444581 Cassette Exon       | 0,33 |
| TC0400002918.mm.1 | 1,36 Mpdz    | PSR0400023685.mm.1 | -2,02 | 0,015815 | 0,45594 Alternative 5' Donc  | 0,14 |
| TC0400002918.mm.1 | 1,36 Mpdz    | PSR0400023703.mm.1 | -2,04 | 0,010964 | 0,425117 Cassette Exon       | 0,3  |
| TC0400002918.mm.1 | 1,36 Mpdz    | JUC0400012388.mm.1 | -2,16 | 0,02939  | 0,509995                     |      |
| TC0400002918.mm.1 | 1,36 Mpdz    | JUC0400012359.mm.1 | -2,17 | 0,019999 | 0,476227                     |      |
| TC0400002918.mm.1 | 1,36 Mpdz    | JUC0400012392.mm.1 | -3,73 | 0,005722 | 0,382767                     |      |
| TC0400002918.mm.1 | 1,36 Mpdz    | JUC0400012387.mm.1 | -4,17 | 0,002465 | 0,349135                     |      |
| TC1300002357.mm.1 | 2,27 Gpr98   | PSR1300015619.mm.1 | -2,02 | 0,013282 | 0,441719 Cassette Exon       | 0,04 |
| TC1300002357.mm.1 | 2,27 Gpr98   | PSR1300015683.mm.1 | -2,18 | 0,032333 | 0,519155 Alternative 5' Donc | 0,12 |
| TC1300002357.mm.1 | 2,27 Gpr98   | PSR1300015716.mm.1 | -2,32 | 0,040828 | 0,543283 Alternative 5' Donc | 0,19 |
| TC1300002357.mm.1 | 2,27 Gpr98   | JUC1300008281.mm.1 | -2,37 | 0,041424 | 0,544646                     |      |
| TC1300002357.mm.1 | 2,27 Gpr98   | PSR1300015631.mm.1 | -2,72 | 0,013943 | 0,446234 Cassette Exon       | 0,14 |
| TC1300002357.mm.1 | 2,27 Gpr98   | JUC1300008293.mm.1 | -3,12 | 0,035572 | 0,528808                     |      |

|                   |                            |                    |       |          |          |                     |      |
|-------------------|----------------------------|--------------------|-------|----------|----------|---------------------|------|
| TC1300002357.mm.1 | 2,27 Gpr98                 | JUC1300008233.mm.1 | -3,28 | 0,013058 | 0,439579 |                     |      |
| TC1300002357.mm.1 | 2,27 Gpr98                 | PSR1300015634.mm.1 | -4,37 | 0,014905 | 0,451803 | Cassette Exon       | 0,3  |
| TC0400003530.mm.1 | 1,44 Thrap3                | JUC0400014971.mm.1 | -2,02 | 0,009319 | 0,414883 |                     |      |
| TC0400003530.mm.1 | 1,44 Thrap3                | PSR0400028681.mm.1 | -2,23 | 0,023666 | 0,491379 | Intron Retention    | 0,28 |
| TC0800002290.mm.1 | 1,56 Clcn3                 | PSR0800017287.mm.1 | -2,02 | 0,021297 | 0,481714 | Intron Retention    | 0,26 |
| TC0800002290.mm.1 | 1,56 Clcn3                 | PSR0800017278.mm.1 | -2,35 | 0,037018 | 0,532502 | Cassette Exon       | 0,12 |
| TC0200003401.mm.1 | 2,07 Strbp                 | PSR0200029250.mm.1 | -2,02 | 0,026177 | 0,50003  | Cassette Exon       | 0,11 |
| TC0200003401.mm.1 | 2,07 Strbp                 | JUC0200014756.mm.1 | -2,03 | 0,043056 | 0,54841  |                     |      |
| TC0200003401.mm.1 | 2,07 Strbp                 | PSR0200029245.mm.1 | -2,1  | 0,038415 | 0,536405 | Cassette Exon       | 0,14 |
| TC0200003401.mm.1 | 2,07 Strbp                 | PSR0200029225.mm.1 | -2,26 | 0,008675 | 0,408783 | Cassette Exon       | 0,12 |
| TC0200003401.mm.1 | 2,07 Strbp                 | PSR0200029249.mm.1 | -2,29 | 0,01999  | 0,476227 | Alternative 5' Donc | 0,09 |
| TC0200003401.mm.1 | 2,07 Strbp                 | PSR0200029247.mm.1 | -2,42 | 0,00982  | 0,417839 | Cassette Exon       | 0,19 |
| TC0200003401.mm.1 | 2,07 Strbp                 | JUC0200014759.mm.1 | -2,61 | 0,012006 | 0,432286 |                     |      |
| TC0200003401.mm.1 | 2,07 Strbp                 | PSR0200029222.mm.1 | -2,66 | 0,021702 | 0,484104 | Cassette Exon       | 0,18 |
| TC0200003401.mm.1 | 2,07 Strbp                 | PSR0200029210.mm.1 | -3,56 | 0,003134 | 0,353892 | Cassette Exon       | 0,24 |
| TC0500000724.mm.1 | 1,36 Cep135                | PSR0500006491.mm.1 | -2,02 | 0,016637 | 0,459985 | Intron Retention    | 0,24 |
| TC0500000724.mm.1 | 1,36 Cep135                | JUC0500003563.mm.1 | -3,06 | 0,027155 | 0,503174 |                     |      |
| TC1000001688.mm.1 | 1,48 Rgs17                 | PSR1000012313.mm.1 | -2,02 | 0,003538 | 0,3562   | Cassette Exon       | 0,14 |
| TC1000001688.mm.1 | 1,48 Rgs17                 | PSR1000012305.mm.1 | -2,17 | 0,006594 | 0,39213  | Alternative 3' Acce | 0,19 |
| TC1000001688.mm.1 | 1,48 Rgs17                 | PSR1000012311.mm.1 | -3,84 | 0,011522 | 0,428397 | Cassette Exon       | 0,24 |
| TC1800001017.mm.1 | 2,91 Aqp4                  | PSR1800007582.mm.1 | -2,02 | 0,0324   | 0,519282 | Cassette Exon       | 0,17 |
| TC1800001017.mm.1 | 2,91 Aqp4                  | PSR1800007580.mm.1 | -2,49 | 0,017376 | 0,463612 | Cassette Exon       | 0,24 |
| TC1800001017.mm.1 | 2,91 Aqp4                  | PSR1800007576.mm.1 | -2,95 | 0,043939 | 0,550715 | Cassette Exon       | 0,11 |
| TC1800001017.mm.1 | 2,91 Aqp4                  | PSR1800007575.mm.1 | -2,96 | 0,037426 | 0,533831 | Cassette Exon       | 0,17 |
| TC1800001017.mm.1 | 2,91 Aqp4                  | PSR1800007578.mm.1 | -3,01 | 0,018702 | 0,470452 | Cassette Exon       | 0,11 |
| TC1800001017.mm.1 | 2,91 Aqp4                  | PSR1800007577.mm.1 | -3,6  | 0,026673 | 0,501957 | Cassette Exon       | 0,11 |
| TC1800001017.mm.1 | 2,91 Aqp4                  | PSR1800007581.mm.1 | -4,92 | 0,014677 | 0,450148 | Cassette Exon       | 0,24 |
| TC0100003865.mm.1 | 1,4 Armc9                  | PSR0100006581.mm.1 | -2,02 | 0,006015 | 0,386586 | Alternative 5' Donc | 0,13 |
| TC0100003865.mm.1 | 1,4 Armc9                  | JUC0100003776.mm.1 | -2,43 | 0,03572  | 0,529027 |                     |      |
| TC0100003865.mm.1 | 1,4 Armc9                  | JUC0100003768.mm.1 | -2,46 | 0,013173 | 0,440567 |                     |      |
| TC0100003865.mm.1 | 1,4 Armc9                  | PSR0100006566.mm.1 | -3,08 | 0,005719 | 0,382767 | Cassette Exon       | 0,22 |
| TC0300001599.mm.1 | 1,92 2700069I18Rik         | PSR0300012829.mm.1 | -2,02 | 0,024724 | 0,494838 | Cassette Exon       | 0,16 |
| TC0300001599.mm.1 | 1,92 2700069I18Rik         | PSR0300012832.mm.1 | -2,14 | 0,006746 | 0,393343 | Cassette Exon       | 0,11 |
| TC0300001599.mm.1 | 1,92 2700069I18Rik         | PSR0300012831.mm.1 | -2,95 | 0,005534 | 0,380557 | Cassette Exon       | 0,19 |
| TC0300001599.mm.1 | 1,92 2700069I18Rik         | PSR0300012827.mm.1 | -3,37 | 0,007333 | 0,399002 | Alternative 3' Acce | 0,22 |
| TC0400002769.mm.1 | 1,04 Mup19; Mup13; LOC1000 | PSR0400022640.mm.1 | -2,02 | 0,006876 | 0,394271 | Cassette Exon       | 0,22 |
| TC0900001632.mm.1 | 2,38 1700048O20Rik         | PSR0900013685.mm.1 | -2,02 | 0,049377 | 0,562864 | Cassette Exon       | 0,14 |
| TC0900001632.mm.1 | 2,38 1700048O20Rik         | JUC0900007694.mm.1 | -2,36 | 0,016528 | 0,459611 |                     |      |
| TC0900001632.mm.1 | 2,38 1700048O20Rik         | PSR0900013684.mm.1 | -3    | 0,018011 | 0,466939 | Cassette Exon       | 0,22 |
| TC0700001406.mm.1 | 1,35 C2cd3                 | JUC0700006227.mm.1 | -2,02 | 0,008899 | 0,410728 |                     |      |
| TC0700001406.mm.1 | 1,35 C2cd3                 | JUC0700006222.mm.1 | -2,23 | 0,001978 | 0,340886 |                     |      |
| TC0700001406.mm.1 | 1,35 C2cd3                 | PSR0700011964.mm.1 | -2,75 | 0,004412 | 0,366761 | Cassette Exon       | 0,21 |
| TC0700003100.mm.1 | 1,07 Nipa2                 | JUC0700015033.mm.1 | -2,02 | 0,007458 | 0,400326 |                     |      |
| TC0700003100.mm.1 | 1,07 Nipa2                 | PSR0700028151.mm.1 | -2,87 | 0,036118 | 0,529768 | Cassette Exon       | 0,2  |
| TC0400001482.mm.1 | 1,3 Gm12942; Zmym6         | PSR0400011351.mm.1 | -2,02 | 0,025716 | 0,498173 | Cassette Exon       | 0,13 |
| TC0400001482.mm.1 | 1,3 Gm12942; Zmym6         | PSR0400011353.mm.1 | -2,06 | 0,04305  | 0,54841  | Cassette Exon       | 0,19 |
| TC0400001482.mm.1 | 1,3 Gm12942; Zmym6         | JUC0400005894.mm.1 | -2,22 | 0,036878 | 0,532257 |                     |      |
| TC0400001482.mm.1 | 1,3 Gm12942; Zmym6         | JUC0400005882.mm.1 | -2,76 | 0,02194  | 0,485023 |                     |      |

|                   |                            |                    |       |          |                              |      |
|-------------------|----------------------------|--------------------|-------|----------|------------------------------|------|
| TC0600003387.mm.1 | 1,54 C2cd5                 | PSR0600026725.mm.1 | -2,02 | 0,002836 | 0,352207 Alternative 3' Acce | 0,18 |
| TC1000002277.mm.1 | -1,49 Mypn                 | PSR1000016346.mm.1 | -2,02 | 0,023862 | 0,492103 Cassette Exon       | 0,18 |
| TC1000002277.mm.1 | -1,49 Mypn                 | JUC1000008962.mm.1 | -2,13 | 0,044357 | 0,551441                     |      |
| TC1200001599.mm.1 | 2,07 Gpr22                 | PSR1200011112.mm.1 | -2,02 | 0,009885 | 0,418122 Intron Retention    | 0,17 |
| TC1200001599.mm.1 | 2,07 Gpr22                 | JUC1200006137.mm.1 | -3,02 | 0,012219 | 0,433326                     |      |
| TC1200001599.mm.1 | 2,07 Gpr22                 | JUC1200006138.mm.1 | -4,44 | 0,01043  | 0,421581                     |      |
| TC0300000302.mm.1 | 1,05                       | PSR0300002156.mm.1 | -2,02 | 0,001224 | 0,322251                     |      |
| TC0300000302.mm.1 | 1,05                       | PSR0300002155.mm.1 | -2,41 | 0,019579 | 0,474672 Cassette Exon       | 0,15 |
| TC0700002736.mm.1 | 1,53 Zfp27                 | PSR0700024220.mm.1 | -2,02 | 0,014244 | 0,447947 Alternative 3' Acce | 0,15 |
| TC0900001866.mm.1 | 1,56 Kri1                  | JUC0900008843.mm.1 | -2,02 | 0,032526 | 0,519918                     |      |
| TC0900001866.mm.1 | 1,56 Kri1                  | PSR0900015706.mm.1 | -2,16 | 0,030095 | 0,511942 Alternative 3' Acce | 0,12 |
| TC0900001866.mm.1 | 1,56 Kri1                  | PSR0900015687.mm.1 | -2,28 | 0,022058 | 0,485327 Alternative 3' Acce | 0,15 |
| TC0900001866.mm.1 | 1,56 Kri1                  | JUC0900008859.mm.1 | -2,37 | 0,009778 | 0,417839                     |      |
| TC0900001866.mm.1 | 1,56 Kri1                  | JUC0900008842.mm.1 | -2,87 | 0,003493 | 0,355638                     |      |
| TC0800003022.mm.1 | 1,22 Mbtps1                | JUC0800012721.mm.1 | -2,02 | 0,03231  | 0,519155                     |      |
| TC0800003022.mm.1 | 1,22 Mbtps1                | PSR0800023229.mm.1 | -2,03 | 0,007575 | 0,401691 Cassette Exon       | 0,14 |
| TC0100002831.mm.1 | 1,63 Mterfd2               | PSR0100022911.mm.1 | -2,02 | 0,041874 | 0,545696 Alternative 3' Acce | 0,13 |
| TC0100002831.mm.1 | 1,63 Mterfd2               | JUC0100013025.mm.1 | -2,62 | 0,036622 | 0,531548                     |      |
| TC0800000509.mm.1 | -1,28 Fat1                 | PSR0800003508.mm.1 | -2,02 | 0,021741 | 0,484249 Cassette Exon       | 0,13 |
| TC0800001193.mm.1 | -1,1 Ces2b                 | PSR0800009262.mm.1 | -2,02 | 0,011577 | 0,429122 Alternative 3' Acce | 0,13 |
| TC0800001193.mm.1 | -1,1 Ces2b                 | JUC0800004959.mm.1 | -4,13 | 0,039065 | 0,538366                     |      |
| TC0X00001797.mm.1 | 1,09 Rbm3; Gm15453         | JUC0X00005810.mm.1 | -2,02 | 0,047911 | 0,559424                     |      |
| TC0X00001797.mm.1 | 1,09 Rbm3; Gm15453         | PSR0X00011483.mm.1 | -2,1  | 0,041646 | 0,545276 Alternative 3' Acce | 0,13 |
| TC1200002256.mm.1 | -1,05 Btbd7                | PSR1200015676.mm.1 | -2,02 | 0,014579 | 0,449876 Cassette Exon       | 0,13 |
| TC1200002256.mm.1 | -1,05 Btbd7                | JUC1200008649.mm.1 | -2,57 | 0,048525 | 0,560991                     |      |
| TC1300000781.mm.1 | 1,02 Cdk20                 | PSR1300005179.mm.1 | -2,02 | 0,023602 | 0,490995 Cassette Exon       | 0,13 |
| TC1300000781.mm.1 | 1,02 Cdk20                 | JUC1300002709.mm.1 | -2,05 | 0,018433 | 0,468646                     |      |
| TC0200005054.mm.1 | -1,01 Gm14221              | PSR0200043192.mm.1 | -2,02 | 0,046654 | 0,556812 Cassette Exon       | 0,12 |
| TC0X00002272.mm.1 | 1,62 Rbm3                  | PSR0X00014437.mm.1 | -2,02 | 0,008024 | 0,404268 Alternative 3' Acce | 0,12 |
| TC0X00002272.mm.1 | 1,62 Rbm3                  | JUC0X00007383.mm.1 | -2,51 | 0,034452 | 0,525886                     |      |
| TC0100001950.mm.1 | 3,87 Ppp1r42               | PSR0100015991.mm.1 | -2,02 | 0,030318 | 0,51274 Cassette Exon        | 0,11 |
| TC0100001950.mm.1 | 3,87 Ppp1r42               | PSR0100015990.mm.1 | -2,16 | 0,013248 | 0,441416 Cassette Exon       | 0,11 |
| TC0100001950.mm.1 | 3,87 Ppp1r42               | JUC0100009067.mm.1 | -4,09 | 0,027537 | 0,504345                     |      |
| TC0200003017.mm.1 | -1,12 Nebl                 | PSR0200024879.mm.1 | -2,02 | 0,046577 | 0,556761 Cassette Exon       | 0,11 |
| TC1100004294.mm.1 | -1,9 Glod4; Gemin4; Gm6330 | PSR1100029837.mm.1 | -2,02 | 0,007593 | 0,401712 Alternative 3' Acce | 0,11 |
| TC0700000498.mm.1 | 1,15 Paf1                  | PSR0700004022.mm.1 | -2,02 | 0,045366 | 0,554024 Cassette Exon       | 0,1  |
| TC0900003336.mm.1 | 1,07 Cdh4                  | PSR0900028046.mm.1 | -2,02 | 0,00756  | 0,401384 Cassette Exon       | 0,09 |
| TC0900003336.mm.1 | 1,07 Cdh4                  | PSR0900011079.mm.1 | -2,14 | 0,035791 | 0,529153 Alternative 5' Donc | 0,05 |
| TC0900003336.mm.1 | 1,07 Cdh4                  | PSR0900011089.mm.1 | -2,21 | 0,033922 | 0,52424 Alternative 5' Donc  | 0,1  |
| TC0900003336.mm.1 | 1,07 Cdh4                  | JUC0900006083.mm.1 | -3,58 | 0,016291 | 0,458454                     |      |
| TC1300000135.mm.1 | 2,24 Amph                  | PSR1300000911.mm.1 | -2,02 | 0,000836 | 0,311886 Cassette Exon       | 0,1  |
| TC1300000135.mm.1 | 2,24 Amph                  | JUC1300000552.mm.1 | -2,07 | 0,013005 | 0,439291                     |      |
| TC1300000135.mm.1 | 2,24 Amph                  | JUC1300000534.mm.1 | -2,1  | 0,023324 | 0,490065                     |      |
| TC1300000135.mm.1 | 2,24 Amph                  | JUC1300000553.mm.1 | -2,62 | 0,008895 | 0,410717                     |      |
| TC1300000135.mm.1 | 2,24 Amph                  | JUC1300000546.mm.1 | -2,84 | 0,034913 | 0,526996                     |      |
| TC1400001469.mm.1 | -1,27 Gm281                | JUC1400005933.mm.1 | -2,02 | 0,032833 | 0,520898                     |      |
| TC1400001469.mm.1 | -1,27 Gm281                | PSR1400011024.mm.1 | -2,25 | 0,001179 | 0,319796 Cassette Exon       | 0,1  |
| TC1700000713.mm.1 | -1,07 Gm8801               | PSR1700007359.mm.1 | -2,02 | 0,017644 | 0,464582 Cassette Exon       | 0,1  |

|                   |                       |                    |       |          |          |                     |      |
|-------------------|-----------------------|--------------------|-------|----------|----------|---------------------|------|
| TC0200003210.mm.1 | 1,02 Tmem8c           | PSR0200027029.mm.1 | -2,02 | 0,028376 | 0,506902 | Cassette Exon       | 0,09 |
| TC0300000749.mm.1 | -1,23 Fam189b         | PSR0300005587.mm.1 | -2,02 | 0,029507 | 0,510135 | Cassette Exon       | 0,09 |
| TC0700001046.mm.1 | -1,08                 | PSR0700009459.mm.1 | -2,02 | 0,02758  | 0,504482 | Cassette Exon       | 0,09 |
| TC1000000735.mm.1 | -1,14 Slc5a4a         | PSR1000005255.mm.1 | -2,02 | 0,049816 | 0,563753 | Cassette Exon       | 0,09 |
| TC0700000564.mm.1 | -1,02 Prodh2          | PSR0700004965.mm.1 | -2,02 | 0,012896 | 0,438165 | Cassette Exon       | 0,08 |
| TC1300002661.mm.1 | 1,32 Gbbp1            | PSR1300018001.mm.1 | -2,02 | 0,022828 | 0,488339 | Cassette Exon       | 0,08 |
| TC1400001420.mm.1 | -1,03 Gm6676; Gm16434 | PSR1400010671.mm.1 | -2,02 | 0,029054 | 0,508954 | Cassette Exon       | 0,08 |
| TC1400001421.mm.1 | -1,03 Gm16434; Gm6676 | PSR1400010679.mm.1 | -2,02 | 0,029054 | 0,508954 | Cassette Exon       | 0,08 |
| TC0600000158.mm.1 | 1,68 Kcnd2            | PSR0600001088.mm.1 | -2,02 | 0,007599 | 0,401712 | Cassette Exon       | 0,07 |
| TC1200001886.mm.1 | 1,49 Trim9            | JUC1200007198.mm.1 | -2,02 | 0,001673 | 0,335182 |                     |      |
| TC1200001549.mm.1 | 1,38 Rnf144a          | JUC1200005916.mm.1 | -2,02 | 0,002907 | 0,352262 |                     |      |
| TC0200004251.mm.1 | -1,26 Prrg4           | JUC0200018298.mm.1 | -2,02 | 0,008283 | 0,406032 |                     |      |
| TC1300000065.mm.1 | 1,12 Gm26861          | JUC1300000244.mm.1 | -2,02 | 0,028595 | 0,507685 |                     |      |
| TC1200002428.mm.1 | -1,11 A730018C14Rik   | JUC1200009284.mm.1 | -2,02 | 0,027329 | 0,503766 |                     |      |
| TC1200002428.mm.1 | -1,11 A730018C14Rik   | JUC1200009286.mm.1 | -2,14 | 0,029289 | 0,509874 |                     |      |
| TC1200002339.mm.1 | -1,15 Bcl11b          | JUC1200008998.mm.1 | -2,02 | 0,041769 | 0,545539 |                     |      |
| TC1300000694.mm.1 | -1,09 Smad5           | JUC1300002409.mm.1 | -2,02 | 0,011219 | 0,426683 |                     |      |
| TC1700002018.mm.1 | 1,12 Trim39           | JUC1700010305.mm.1 | -2,02 | 0,040227 | 0,541714 |                     |      |
| TC0200001764.mm.1 | 1,04 Zfyve19          | JUC0200006577.mm.1 | -2,02 | 0,007931 | 0,403819 |                     |      |
| TC0200001764.mm.1 | 1,04 Zfyve19          | JUC0200006576.mm.1 | -2,32 | 0,028182 | 0,506368 |                     |      |
| TC0200001764.mm.1 | 1,04 Zfyve19          | JUC0200006573.mm.1 | -2,49 | 0,005735 | 0,382993 |                     |      |
| TC0200002337.mm.1 | -1,71 Bpifb1          | JUC0200009360.mm.1 | -2,02 | 0,040887 | 0,543423 |                     |      |
| TC1700000476.mm.1 | 1,29 Fance            | JUC1700002258.mm.1 | -2,02 | 0,035502 | 0,528731 |                     |      |
| TC1700000476.mm.1 | 1,29 Fance            | JUC1700002255.mm.1 | -2,06 | 0,009801 | 0,417839 |                     |      |
| TC1700000476.mm.1 | 1,29 Fance            | JUC1700002253.mm.1 | -2,21 | 0,025611 | 0,497893 |                     |      |
| TC1700000476.mm.1 | 1,29 Fance            | JUC1700002242.mm.1 | -2,4  | 0,000406 | 0,297771 |                     |      |
| TC0800001019.mm.1 | -1,27 Gm2694          | JUC0800004140.mm.1 | -2,02 | 0,042333 | 0,547323 |                     |      |
| TC0500002845.mm.1 | 1,47 Helq             | JUC0500013640.mm.1 | -2,02 | 0,029928 | 0,511499 |                     |      |
| TC0500002818.mm.1 | -1,29 Rasgef1b        | JUC0500013462.mm.1 | -2,02 | 0,040252 | 0,541756 |                     |      |
| TC0800000207.mm.1 | 2,04 Gm20946          | JUC0800000993.mm.1 | -2,02 | 0,005006 | 0,373851 |                     |      |
| TC0900001635.mm.1 | 1,06 Snrk             | JUC0900007717.mm.1 | -2,02 | 0,044387 | 0,551441 |                     |      |
| TC0500001066.mm.1 | 1,71 Cdc7             | JUC0500004902.mm.1 | -2,02 | 0,044373 | 0,551441 |                     |      |
| TC0500001066.mm.1 | 1,71 Cdc7             | JUC0500004908.mm.1 | -2,2  | 0,041683 | 0,545356 |                     |      |
| TC0500001066.mm.1 | 1,71 Cdc7             | JUC0500004912.mm.1 | -2,2  | 0,027706 | 0,504872 |                     |      |
| TC0600000651.mm.1 | -1,33 Wipf3           | JUC0600002498.mm.1 | -2,02 | 0,022941 | 0,488667 |                     |      |
| TC0600002161.mm.1 | -1,02 Kel             | JUC0600008966.mm.1 | -2,02 | 0,038249 | 0,535883 |                     |      |
| TC0600003463.mm.1 | -1,21                 | JUC0600014357.mm.1 | -2,02 | 0,006713 | 0,393343 |                     |      |
| TC0700002737.mm.1 | -1,03                 | JUC0700012940.mm.1 | -2,02 | 0,001118 | 0,317328 |                     |      |
| TC1000002992.mm.1 | 1,26 Tmevpg1          | JUC1000012282.mm.1 | -2,02 | 0,046348 | 0,556272 |                     |      |
| TC1000002992.mm.1 | 1,26 Tmevpg1          | PSR1000022404.mm.1 | -2,04 | 0,021974 | 0,485125 |                     |      |
| TC1000002002.mm.1 | 1,06                  | JUC1000007756.mm.1 | -2,02 | 0,03784  | 0,534803 |                     |      |
| TC0300002680.mm.1 | 1,19 I830077J02Rik    | JUC0300010844.mm.1 | -2,02 | 0,008436 | 0,406611 |                     |      |
| TC1100002114.mm.1 | 1,19 Mtmr3            | JUC1100010746.mm.1 | -2,02 | 0,003677 | 0,357266 |                     |      |
| TC0X00000122.mm.1 | 1,21 Sytl5            | JUC0X00000387.mm.1 | -2,02 | 0,045024 | 0,553022 |                     |      |
| TC0900002823.mm.1 | 1,4 Tbc1d2b           | JUC0900013120.mm.1 | -2,02 | 0,013392 | 0,442449 |                     |      |
| TC0X00003079.mm.1 | -1,16 Tex13           | JUC0X00009783.mm.1 | -2,02 | 0,000214 | 0,28803  |                     |      |
| TC0X00003307.mm.1 | 1,11 Gm15201          | JUC0X00010410.mm.1 | -2,02 | 0,03832  | 0,536178 |                     |      |
| TC0600001244.mm.1 | 2,28 Cpne9            | PSR0600009570.mm.1 | -2,03 | 0,013752 | 0,444758 | Alternative 5' Donc | 0,22 |

|                   |             |                    |       |          |                              |      |
|-------------------|-------------|--------------------|-------|----------|------------------------------|------|
| TC0600001244.mm.1 | 2,28 Cpne9  | JUC0600004936.mm.1 | -2,18 | 0,03052  | 0,51337                      |      |
| TC0600001244.mm.1 | 2,28 Cpne9  | PSR0600009574.mm.1 | -2,23 | 0,008958 | 0,411476 Alternative 5' Donc | 0,22 |
| TC0600001244.mm.1 | 2,28 Cpne9  | PSR0600009572.mm.1 | -2,24 | 0,022774 | 0,488081 Alternative 5' Donc | 0,22 |
| TC0600001244.mm.1 | 2,28 Cpne9  | PSR0600009582.mm.1 | -2,26 | 0,002227 | 0,345773 Intron Retention    | 0,26 |
| TC0600001244.mm.1 | 2,28 Cpne9  | JUC0600004930.mm.1 | -2,55 | 0,010847 | 0,424161                     |      |
| TC0600001244.mm.1 | 2,28 Cpne9  | PSR0600009595.mm.1 | -2,86 | 0,007126 | 0,397139 Alternative 5' Donc | 0,26 |
| TC0600001244.mm.1 | 2,28 Cpne9  | PSR0600009555.mm.1 | -2,87 | 0,011212 | 0,426683 Alternative 3' Acce | 0,32 |
| TC0600001244.mm.1 | 2,28 Cpne9  | PSR0600009556.mm.1 | -2,89 | 0,020532 | 0,478295 Alternative 3' Acce | 0,32 |
| TC0600001244.mm.1 | 2,28 Cpne9  | PSR0600009549.mm.1 | -2,94 | 0,013952 | 0,446239 Alternative 3' Acce | 0,01 |
| TC0600001244.mm.1 | 2,28 Cpne9  | JUC0600004937.mm.1 | -2,97 | 0,037004 | 0,532502                     |      |
| TC0600001244.mm.1 | 2,28 Cpne9  | PSR0600009559.mm.1 | -3,04 | 0,032922 | 0,521149 Intron Retention    | 0,45 |
| TC0600001244.mm.1 | 2,28 Cpne9  | PSR0600009564.mm.1 | -3,09 | 0,008492 | 0,406966 Intron Retention    | 0,5  |
| TC0600001244.mm.1 | 2,28 Cpne9  | JUC0600004923.mm.1 | -3,11 | 0,039047 | 0,538264                     |      |
| TC0600001244.mm.1 | 2,28 Cpne9  | PSR0600009557.mm.1 | -3,38 | 0,006557 | 0,39213 Alternative 3' Acce  | 0,32 |
| TC0600001244.mm.1 | 2,28 Cpne9  | PSR0600009575.mm.1 | -3,76 | 0,000704 | 0,305967 Alternative 3' Acce | 0,29 |
| TC0600001244.mm.1 | 2,28 Cpne9  | PSR0600009584.mm.1 | -3,95 | 0,000682 | 0,304417 Intron Retention    | 0,74 |
| TC0600001244.mm.1 | 2,28 Cpne9  | PSR0600009565.mm.1 | -4,69 | 0,005535 | 0,380557 Intron Retention    | 0,5  |
| TC0600001244.mm.1 | 2,28 Cpne9  | JUC0600004946.mm.1 | -5,95 | 0,004092 | 0,36228                      |      |
| TC0400001035.mm.1 | 2,18 Dnajc6 | PSR0400007032.mm.1 | -2,03 | 0,038481 | 0,53651 Alternative 3' Acce  | 0,13 |
| TC0400001035.mm.1 | 2,18 Dnajc6 | PSR0400007014.mm.1 | -2,11 | 0,008903 | 0,410728 Cassette Exon       | 0,11 |
| TC0400001035.mm.1 | 2,18 Dnajc6 | JUC0400003607.mm.1 | -2,15 | 0,023223 | 0,490032                     |      |
| TC0400001035.mm.1 | 2,18 Dnajc6 | JUC0400003600.mm.1 | -2,35 | 0,006026 | 0,386586                     |      |
| TC0400001035.mm.1 | 2,18 Dnajc6 | PSR0400007017.mm.1 | -2,97 | 0,006422 | 0,389915 Intron Retention    | 0,49 |
| TC0300001857.mm.1 | 3,28 Bbs7   | JUC0300007585.mm.1 | -2,03 | 0,030739 | 0,514065                     |      |
| TC0300001857.mm.1 | 3,28 Bbs7   | PSR0300014388.mm.1 | -2,47 | 0,035392 | 0,528596 Alternative 3' Acce | 0,24 |
| TC0300001857.mm.1 | 3,28 Bbs7   | PSR0300014398.mm.1 | -3,98 | 0,012715 | 0,43654 Alternative 5' Donc  | 0,47 |
| TC0300001857.mm.1 | 3,28 Bbs7   | JUC0300007587.mm.1 | -4,09 | 0,016367 | 0,458693                     |      |
| TC0300001857.mm.1 | 3,28 Bbs7   | JUC0300007588.mm.1 | -8,88 | 0,019164 | 0,472719                     |      |
| TC0X00001413.mm.1 | 3,33 Pak3   | PSR0X00008967.mm.1 | -2,03 | 0,048805 | 0,561503 Cassette Exon       | 0,09 |
| TC0X00001413.mm.1 | 3,33 Pak3   | JUC0X00004423.mm.1 | -2,05 | 0,030129 | 0,512017                     |      |
| TC0X00001413.mm.1 | 3,33 Pak3   | JUC0X00004439.mm.1 | -2,11 | 0,013701 | 0,444746                     |      |
| TC0X00001413.mm.1 | 3,33 Pak3   | PSR0X00008968.mm.1 | -2,26 | 0,00021  | 0,28803 Cassette Exon        | 0,09 |
| TC0X00001413.mm.1 | 3,33 Pak3   | PSR0X00008939.mm.1 | -2,6  | 0,004645 | 0,370181 Cassette Exon       | 0,17 |
| TC0X00001413.mm.1 | 3,33 Pak3   | JUC0X00004441.mm.1 | -2,81 | 0,039247 | 0,53893                      |      |
| TC0X00001413.mm.1 | 3,33 Pak3   | PSR0X00008972.mm.1 | -2,91 | 0,009622 | 0,417315 Cassette Exon       | 0,17 |
| TC0X00001413.mm.1 | 3,33 Pak3   | PSR0X00008960.mm.1 | -3    | 0,003448 | 0,3554 Alternative 5' Donc   | 0,27 |
| TC0X00001413.mm.1 | 3,33 Pak3   | PSR0X00008938.mm.1 | -3,07 | 0,008846 | 0,410308 Cassette Exon       | 0,17 |
| TC0X00001413.mm.1 | 3,33 Pak3   | PSR0X00008956.mm.1 | -3,18 | 0,006731 | 0,393343 Cassette Exon       | 0,05 |
| TC0X00001413.mm.1 | 3,33 Pak3   | JUC0X00004443.mm.1 | -3,25 | 0,010841 | 0,424161                     |      |
| TC0X00001413.mm.1 | 3,33 Pak3   | PSR0X00008952.mm.1 | -3,39 | 0,037011 | 0,532502 Cassette Exon       | 0,19 |
| TC0X00001413.mm.1 | 3,33 Pak3   | PSR0X00008947.mm.1 | -3,48 | 0,001225 | 0,322251 Cassette Exon       | 0,15 |
| TC0X00001413.mm.1 | 3,33 Pak3   | JUC0X00004437.mm.1 | -3,68 | 0,036097 | 0,529729                     |      |
| TC0X00001413.mm.1 | 3,33 Pak3   | PSR0X00008954.mm.1 | -4,05 | 0,012306 | 0,434378 Cassette Exon       | 0,22 |
| TC0X00001413.mm.1 | 3,33 Pak3   | PSR0X00008946.mm.1 | -4,06 | 0,004267 | 0,363868 Alternative 3' Acce | 0,01 |
| TC0X00001413.mm.1 | 3,33 Pak3   | PSR0X00008953.mm.1 | -4,41 | 0,002636 | 0,349612 Alternative 5' Donc | 0,1  |
| TC0X00001413.mm.1 | 3,33 Pak3   | PSR0X00008949.mm.1 | -4,49 | 0,005896 | 0,383835 Cassette Exon       | 0,18 |
| TC0X00001413.mm.1 | 3,33 Pak3   | PSR0X00008955.mm.1 | -4,72 | 0,000316 | 0,288663 Cassette Exon       | 0,32 |
| TC0X00001413.mm.1 | 3,33 Pak3   | JUC0X00004434.mm.1 | -4,75 | 0,011596 | 0,429347                     |      |

|                   |                     |                    |        |          |                              |      |
|-------------------|---------------------|--------------------|--------|----------|------------------------------|------|
| TCOX00001413.mm.1 | 3,33 Pak3           | PSROX00008948.mm.1 | -5,21  | 0,00395  | 0,359922 Intron Retention    | 0,07 |
| TCOX00001413.mm.1 | 3,33 Pak3           | PSROX00008942.mm.1 | -5,32  | 0,005819 | 0,383169 Cassette Exon       | 0,39 |
| TCOX00001413.mm.1 | 3,33 Pak3           | PSROX00008940.mm.1 | -5,46  | 0,019158 | 0,472719 Cassette Exon       | 0,26 |
| TCOX00001413.mm.1 | 3,33 Pak3           | PSROX00008950.mm.1 | -5,65  | 0,001017 | 0,316361 Intron Retention    | 0,08 |
| TCOX00001413.mm.1 | 3,33 Pak3           | JUCOX00004436.mm.1 | -6,03  | 0,010698 | 0,423322                     |      |
| TCOX00001413.mm.1 | 3,33 Pak3           | JUCOX00004432.mm.1 | -6,29  | 0,003231 | 0,354243                     |      |
| TCOX00001413.mm.1 | 3,33 Pak3           | JUCOX00004448.mm.1 | -7,05  | 0,003872 | 0,358883                     |      |
| TCOX00001413.mm.1 | 3,33 Pak3           | PSROX00008962.mm.1 | -7,57  | 0,004813 | 0,371408 Cassette Exon       | 0,46 |
| TCOX00001413.mm.1 | 3,33 Pak3           | PSROX00008943.mm.1 | -13,65 | 0,002962 | 0,352501 Cassette Exon       | 0,21 |
| TCO200005183.mm.1 | 8,37 Kcnc1; Gm14290 | PSRO200044364.mm.1 | -2,03  | 0,013946 | 0,446234 Intron Retention    | 0,25 |
| TCO200005183.mm.1 | 8,37 Kcnc1; Gm14290 | PSRO200044358.mm.1 | -2,27  | 0,027382 | 0,503961 Alternative 3' Acce | 0,16 |
| TCO200005183.mm.1 | 8,37 Kcnc1; Gm14290 | PSRO200044360.mm.1 | -2,79  | 0,037418 | 0,533831 Intron Retention    | 0,44 |
| TCO200005183.mm.1 | 8,37 Kcnc1; Gm14290 | PSRO200044374.mm.1 | -7,09  | 0,00463  | 0,369836                     |      |
| TCO200005183.mm.1 | 8,37 Kcnc1; Gm14290 | JUCO200022899.mm.1 | -10,39 | 0,000798 | 0,31174                      |      |
| TCO200005183.mm.1 | 8,37 Kcnc1; Gm14290 | JUCO200022897.mm.1 | -16,76 | 0,000929 | 0,313363                     |      |
| TCO200005183.mm.1 | 8,37 Kcnc1; Gm14290 | PSRO200044380.mm.1 | -18,68 | 0,005136 | 0,376442 Cassette Exon       | 0,28 |
| TC1000001949.mm.1 | 3 Hey2              | PSR1000014039.mm.1 | -2,03  | 0,029804 | 0,511132 Cassette Exon       | 0,14 |
| TC1000001949.mm.1 | 3 Hey2              | PSR1000014043.mm.1 | -2,72  | 0,016337 | 0,458616 Intron Retention    | 0,24 |
| TC1000001949.mm.1 | 3 Hey2              | PSR1000014048.mm.1 | -3,57  | 0,037152 | 0,533065 Cassette Exon       | 0,25 |
| TC1000001949.mm.1 | 3 Hey2              | PSR1000014045.mm.1 | -3,81  | 0,022786 | 0,488142 Alternative 5' Donc | 0,31 |
| TC1000001949.mm.1 | 3 Hey2              | PSR1000014046.mm.1 | -3,82  | 0,039772 | 0,540537 Cassette Exon       | 0,27 |
| TC1000001949.mm.1 | 3 Hey2              | PSR1000014041.mm.1 | -4,02  | 0,011624 | 0,429746 Alternative 3' Acce | 0,35 |
| TC1100000442.mm.1 | 1,91 Ebf1           | PSR1100003446.mm.1 | -2,03  | 0,045886 | 0,555077 Alternative 5' Donc | 0,1  |
| TC1100000442.mm.1 | 1,91 Ebf1           | PSR1100003447.mm.1 | -2,12  | 0,006759 | 0,393343 Alternative 3' Acce | 0,17 |
| TC1100000442.mm.1 | 1,91 Ebf1           | PSR1100003451.mm.1 | -2,39  | 0,037855 | 0,534804 Alternative 5' Donc | 0,21 |
| TC1100000442.mm.1 | 1,91 Ebf1           | PSR1100003464.mm.1 | -2,62  | 0,0356   | 0,528887 Cassette Exon       | 0,14 |
| TC1100000442.mm.1 | 1,91 Ebf1           | JUC1100001826.mm.1 | -3,04  | 0,039717 | 0,540494                     |      |
| TC1100000442.mm.1 | 1,91 Ebf1           | PSR1100003474.mm.1 | -3,12  | 0,023262 | 0,49004 Alternative 5' Donc  | 0,31 |
| TC1200002012.mm.1 | 1,88 Slc8a3         | PSR1200013845.mm.1 | -2,03  | 0,014341 | 0,448173 Cassette Exon       | 0,09 |
| TC1200002012.mm.1 | 1,88 Slc8a3         | PSR1200013850.mm.1 | -2,26  | 0,038876 | 0,537855 Cassette Exon       | 0,27 |
| TC1200002012.mm.1 | 1,88 Slc8a3         | PSR1200013847.mm.1 | -2,31  | 0,035845 | 0,529376 Alternative 3' Acce | 0,21 |
| TC1200002012.mm.1 | 1,88 Slc8a3         | PSR1200013853.mm.1 | -2,39  | 0,011384 | 0,427549 Cassette Exon       | 0,12 |
| TC1200002012.mm.1 | 1,88 Slc8a3         | JUC1200007652.mm.1 | -2,97  | 0,000332 | 0,28927                      |      |
| TCOX00002513.mm.1 | 1,02 Prrg1          | PSROX00016043.mm.1 | -2,03  | 0,002959 | 0,352501 Alternative 3' Acce | 0,03 |
| TCOX00002513.mm.1 | 1,02 Prrg1          | PSROX00016060.mm.1 | -2,5   | 0,006292 | 0,388979 Cassette Exon       | 0,1  |
| TCOX00002513.mm.1 | 1,02 Prrg1          | PSROX00016049.mm.1 | -2,54  | 0,024865 | 0,495577 Alternative 5' Donc | 0,25 |
| TCO900001555.mm.1 | 1,6 Azi2            | PSRO900012880.mm.1 | -2,03  | 0,030754 | 0,514087 Alternative 5' Donc | 0,14 |
| TCO900001555.mm.1 | 1,6 Azi2            | PSRO900012885.mm.1 | -2,29  | 0,00138  | 0,32572 Intron Retention     | 0,23 |
| TCO900001555.mm.1 | 1,6 Azi2            | PSRO900012896.mm.1 | -2,68  | 0,048115 | 0,559875 Alternative 5' Donc | 0,23 |
| TCO900001555.mm.1 | 1,6 Azi2            | JUCO900007229.mm.1 | -3,51  | 0,02738  | 0,503961                     |      |
| TCO900002944.mm.1 | -1,35 Ppp2r3a       | PSRO900024258.mm.1 | -2,03  | 0,020984 | 0,480104 Cassette Exon       | 0,22 |
| TCO900002944.mm.1 | -1,35 Ppp2r3a       | JUCO900013543.mm.1 | -4,5   | 0,00729  | 0,398842                     |      |
| TCO600003208.mm.1 | 1,58 BC048546       | PSRO600025074.mm.1 | -2,03  | 0,026056 | 0,499575 Cassette Exon       | 0,11 |
| TCO600003208.mm.1 | 1,58 BC048546       | JUCO600013055.mm.1 | -2,16  | 0,018586 | 0,469618                     |      |
| TCO600003208.mm.1 | 1,58 BC048546       | PSRO600025091.mm.1 | -2,2   | 0,036117 | 0,529765 Intron Retention    | 0,21 |
| TCO600003208.mm.1 | 1,58 BC048546       | PSRO600025083.mm.1 | -2,2   | 0,004421 | 0,366832 Cassette Exon       | 0,13 |
| TCO600003208.mm.1 | 1,58 BC048546       | PSRO600025088.mm.1 | -2,44  | 0,048527 | 0,560991 Cassette Exon       | 0,15 |
| TCO600003208.mm.1 | 1,58 BC048546       | JUCO600013067.mm.1 | -3,6   | 0,011249 | 0,426718                     |      |



|                   |                              |                    |       |          |                              |      |
|-------------------|------------------------------|--------------------|-------|----------|------------------------------|------|
| TC0700003345.mm.1 | 2,63 D7Erd715e               | PSR0700028673.mm.1 | -2,03 | 0,012568 | 0,435803 Intron Retention    | 0,2  |
| TC0700003345.mm.1 | 2,63 D7Erd715e               | PSR0700028667.mm.1 | -2,15 | 0,031172 | 0,515739 Alternative 3' Acce | 0,15 |
| TC0700003345.mm.1 | 2,63 D7Erd715e               | PSR0700028657.mm.1 | -2,81 | 0,022889 | 0,488524                     |      |
| TC0700003345.mm.1 | 2,63 D7Erd715e               | PSR0700028659.mm.1 | -5,03 | 0,004475 | 0,367858                     |      |
| TC0200001015.mm.1 | 1,73 Ubr3                    | JUC0200004134.mm.1 | -2,03 | 0,006174 | 0,387873                     |      |
| TC0200001015.mm.1 | 1,73 Ubr3                    | PSR0200008055.mm.1 | -2,51 | 0,015835 | 0,456151 Alternative 5' Donc | 0,19 |
| TC0100000424.mm.1 | -1,17 Spats2l                | PSR0100003262.mm.1 | -2,03 | 0,017417 | 0,46377 Cassette Exon        | 0,18 |
| TC0100000424.mm.1 | -1,17 Spats2l                | JUC0100001891.mm.1 | -2,43 | 0,003097 | 0,353892                     |      |
| TC0200001011.mm.1 | 1,6 Phospho2                 | PSR0200007978.mm.1 | -2,03 | 0,021305 | 0,481714 Alternative 3' Acce | 0,17 |
| TC0200001011.mm.1 | 1,6 Phospho2                 | JUC0200004074.mm.1 | -2,38 | 0,047517 | 0,558686                     |      |
| TC0200001011.mm.1 | 1,6 Phospho2                 | PSR0200007988.mm.1 | -2,4  | 0,035524 | 0,528764 Cassette Exon       | 0,13 |
| TC1400000968.mm.1 | 1,29 Stc1                    | PSR1400007761.mm.1 | -2,03 | 0,014692 | 0,450253 Alternative 5' Donc | 0,17 |
| TC0200002691.mm.1 | 1,25 Rab22a                  | PSR0200021960.mm.1 | -2,03 | 0,001636 | 0,332976 Alternative 3' Acce | 0,16 |
| TC0300003176.mm.1 | 1,53 Tyw3                    | PSR0300024910.mm.1 | -2,03 | 0,00185  | 0,337414 Alternative 3' Acce | 0,16 |
| TC0X00001859.mm.1 | -1,7 Med14                   | PSR0X00011943.mm.1 | -2,03 | 0,004729 | 0,370888 Alternative 3' Acce | 0,16 |
| TC1100000500.mm.1 | 1,23 Mgat1                   | JUC1100002014.mm.1 | -2,03 | 0,026653 | 0,501823                     |      |
| TC1100000500.mm.1 | 1,23 Mgat1                   | PSR1100003869.mm.1 | -2,51 | 0,035753 | 0,529077 Cassette Exon       | 0,16 |
| TC1500002100.mm.1 | 1,33 Prickle1                | PSR1500016888.mm.1 | -2,03 | 0,014122 | 0,447137 Alternative 5' Donc | 0,16 |
| TC1600000480.mm.1 | 1,44 Itgb5                   | PSR1600004567.mm.1 | -2,03 | 0,023687 | 0,491379 Alternative 5' Donc | 0,16 |
| TC1600000480.mm.1 | 1,44 Itgb5                   | JUC1600002382.mm.1 | -3,35 | 0,041368 | 0,544518                     |      |
| TC0200002717.mm.1 | 1,29                         | PSR0200022215.mm.1 | -2,03 | 0,003406 | 0,355152 Alternative 5' Donc | 0,16 |
| TC0400001362.mm.1 | -1,02 Col9a2                 | JUC0400005404.mm.1 | -2,03 | 0,02285  | 0,488353                     |      |
| TC0400001362.mm.1 | -1,02 Col9a2                 | PSR0400010351.mm.1 | -2,09 | 0,021599 | 0,48335 Alternative 3' Acce  | 0,15 |
| TC0700003608.mm.1 | 1,02 Cpeb1                   | PSR0700030710.mm.1 | -2,03 | 0,046049 | 0,555632 Alternative 5' Donc | 0,15 |
| TC0800002382.mm.1 | 1,13 Ncan                    | PSR0800017977.mm.1 | -2,03 | 0,008    | 0,403872 Alternative 5' Donc | 0,15 |
| TC0800002382.mm.1 | 1,13 Ncan                    | JUC0800009748.mm.1 | -2,03 | 0,007809 | 0,403089                     |      |
| TC0800002382.mm.1 | 1,13 Ncan                    | JUC0800009745.mm.1 | -2,09 | 0,002769 | 0,350512                     |      |
| TC0900000598.mm.1 | 1,03 Plet1                   | PSR0900004233.mm.1 | -2,03 | 0,010576 | 0,422452 Alternative 5' Donc | 0,15 |
| TC0500002993.mm.1 | 1,05 Noc4l                   | PSR0500026481.mm.1 | -2,03 | 0,00522  | 0,377078 Cassette Exon       | 0,14 |
| TC0500002993.mm.1 | 1,05 Noc4l                   | PSR0500026480.mm.1 | -2,06 | 0,040311 | 0,541838 Cassette Exon       | 0,14 |
| TC0700000495.mm.1 | 1,23 Rps16; LOC100862433; Rp | PSR0700004005.mm.1 | -2,03 | 0,034309 | 0,525528 Alternative 5' Donc | 0,13 |
| TC1100003218.mm.1 | 1,44 Ovca2; Dph1             | PSR1100029589.mm.1 | -2,03 | 0,004906 | 0,372627 Alternative 5' Donc | 0,08 |
| TC1100003218.mm.1 | 1,44 Ovca2; Dph1             | PSR1100029609.mm.1 | -2,31 | 0,000665 | 0,304044 Cassette Exon       | 0,13 |
| TC1900000645.mm.1 | 1,71 Scd3                    | PSR1900005712.mm.1 | -2,03 | 0,025782 | 0,498468 Cassette Exon       | 0,13 |
| TC0700004068.mm.1 | 2,02 Ric3                    | PSR0700033582.mm.1 | -2,03 | 0,03424  | 0,525168 Alternative 3' Acce | 0,12 |
| TC0700004068.mm.1 | 2,02 Ric3                    | JUC0700017619.mm.1 | -3,34 | 0,022895 | 0,488524                     |      |
| TC0X00000088.mm.1 | 1,28 Slc38a5                 | PSR0X00000662.mm.1 | -2,03 | 0,01537  | 0,453849 Cassette Exon       | 0,12 |
| TC1100000499.mm.1 | 1,06 Zfp62                   | PSR1100003812.mm.1 | -2,03 | 0,015466 | 0,454312 Alternative 3' Acce | 0,12 |
| TC1100000499.mm.1 | 1,06 Zfp62                   | JUC1100002004.mm.1 | -2,92 | 0,000576 | 0,304044                     |      |
| TC1100000499.mm.1 | 1,06 Zfp62                   | JUC1100002001.mm.1 | -4,92 | 0,034502 | 0,525929                     |      |
| TC0100002392.mm.1 | 1,64 Trak2                   | PSR0100019498.mm.1 | -2,03 | 0,016461 | 0,459205 Cassette Exon       | 0,1  |
| TC0400004030.mm.1 | 1,3 Pex14                    | PSR0400033352.mm.1 | -2,03 | 0,031731 | 0,517489 Cassette Exon       | 0,1  |
| TC0400004030.mm.1 | 1,3 Pex14                    | JUC0400017399.mm.1 | -2,31 | 0,019751 | 0,474932                     |      |
| TC0800002728.mm.1 | 1,19 9330175E14Rik           | PSR0800020896.mm.1 | -2,03 | 0,041445 | 0,544646 Cassette Exon       | 0,1  |
| TC0800002728.mm.1 | 1,19 9330175E14Rik           | JUC0800011383.mm.1 | -4,16 | 0,045029 | 0,553037                     |      |
| TC1400000914.mm.1 | 1,01 Prss51                  | PSR1400007312.mm.1 | -2,03 | 0,004716 | 0,370888 Cassette Exon       | 0,1  |
| TC1700000278.mm.1 | 1,34 Zfp760                  | PSR1700002068.mm.1 | -2,03 | 0,002176 | 0,344453 Cassette Exon       | 0,1  |
| TC1700000278.mm.1 | 1,34 Zfp760                  | JUC1700001120.mm.1 | -2,42 | 0,046934 | 0,557521                     |      |

|                   |                              |                    |       |          |          |                     |      |
|-------------------|------------------------------|--------------------|-------|----------|----------|---------------------|------|
| TC1800000887.mm.1 | 1,34                         | PSR1800006434.mm.1 | -2,03 | 0,035749 | 0,529051 | Cassette Exon       | 0,1  |
| TC0300001472.mm.1 | -1,14 Gm16233                | PSR0300011813.mm.1 | -2,03 | 0,027114 | 0,503022 | Cassette Exon       | 0,08 |
| TC0700003035.mm.1 | 1,14 Sergef                  | JUC0700014805.mm.1 | -2,03 | 0,038132 | 0,535709 |                     |      |
| TC0700003035.mm.1 | 1,14 Sergef                  | PSR0700027671.mm.1 | -2,08 | 0,022454 | 0,487003 | Cassette Exon       | 0,08 |
| TC1000000581.mm.1 | -1,08 Hk1os; 2210417K05Rik   | PSR1000003941.mm.1 | -2,03 | 0,027135 | 0,503096 | Cassette Exon       | 0,08 |
| TC1900001313.mm.1 | -1,16 D19Bwg1357e            | PSR1900011696.mm.1 | -2,03 | 0,00522  | 0,377078 | Cassette Exon       | 0,08 |
| TC0600000609.mm.1 | 1,7 Snx10                    | PSR0600004661.mm.1 | -2,03 | 0,011415 | 0,427626 | Alternative 5' Donc | 0,05 |
| TC0600001751.mm.1 | 1,26 Far2                    | PSR0600013967.mm.1 | -2,03 | 0,028718 | 0,508133 | Alternative 5' Donc | 0,04 |
| TC0600001751.mm.1 | 1,26 Far2                    | JUC0600007321.mm.1 | -2,83 | 0,012433 | 0,43528  |                     |      |
| TC1400000277.mm.1 | 1,49 Fam208a                 | JUC1400001359.mm.1 | -2,03 | 0,041921 | 0,545814 |                     |      |
| TC1400000277.mm.1 | 1,49 Fam208a                 | JUC1400001357.mm.1 | -3,81 | 0,000706 | 0,306015 |                     |      |
| TC1400000277.mm.1 | 1,49 Fam208a                 | JUC1400001341.mm.1 | -7,25 | 0,015606 | 0,455078 |                     |      |
| TC1400000299.mm.1 | 1,2 Actr8                    | JUC1400001427.mm.1 | -2,03 | 0,035382 | 0,528536 |                     |      |
| TC1300002748.mm.1 | 1,3 Zfp131                   | JUC1300009986.mm.1 | -2,03 | 0,012914 | 0,438305 |                     |      |
| TC1300002748.mm.1 | 1,3 Zfp131                   | JUC1300009992.mm.1 | -3,67 | 0,025444 | 0,497549 |                     |      |
| TC1400002096.mm.1 | 1,06 Tinf2                   | JUC1400008767.mm.1 | -2,03 | 0,008865 | 0,410539 |                     |      |
| TC1200000020.mm.1 | 1,4                          | JUC1200000153.mm.1 | -2,03 | 0,020188 | 0,477113 |                     |      |
| TC0100002395.mm.1 | 1,51 Tmem237                 | JUC0100011075.mm.1 | -2,03 | 0,022034 | 0,485268 |                     |      |
| TC0100002214.mm.1 | 1,22 Rev1                    | JUC0100010136.mm.1 | -2,03 | 0,049674 | 0,563531 |                     |      |
| TC0100002214.mm.1 | 1,22 Rev1                    | PSR0100010123.mm.1 | -2,97 | 0,008078 | 0,404784 |                     |      |
| TC0200001972.mm.1 | 1,23 Nop56; Snord57; Gm2445  | PSR0200015611.mm.1 | -2,03 | 0,048741 | 0,56139  |                     |      |
| TC0500002075.mm.1 | -1,54 Atg9b                  | JUC0500010284.mm.1 | -2,03 | 0,035478 | 0,528724 |                     |      |
| TC0800002745.mm.1 | -1,02 Csnk2a2                | JUC0800011510.mm.1 | -2,03 | 0,018012 | 0,466939 |                     |      |
| TC0900000281.mm.1 | 1,16 Nfrkb                   | JUC0900001182.mm.1 | -2,03 | 0,016136 | 0,457846 |                     |      |
| TC0700000798.mm.1 | 1,23 2410002F23Rik; Snord88a | JUC0700003234.mm.1 | -2,03 | 0,006764 | 0,393343 |                     |      |
| TC0600002462.mm.1 | -1,42 Smyd1                  | JUC0600009887.mm.1 | -2,03 | 0,047294 | 0,558249 |                     |      |
| TC0600003388.mm.1 | -1,12                        | JUC0600014017.mm.1 | -2,03 | 0,037576 | 0,534053 |                     |      |
| TC0900001766.mm.1 | 1,13 Cep57                   | JUC0900008302.mm.1 | -2,03 | 0,035383 | 0,528536 |                     |      |
| TC1100001115.mm.1 | -1,01 Ssh2                   | JUC1100005324.mm.1 | -2,03 | 0,028934 | 0,508626 |                     |      |
| TC1000002017.mm.1 | 1,61 Fam229b                 | JUC1000007776.mm.1 | -2,03 | 0,016894 | 0,460797 |                     |      |
| TC1000002017.mm.1 | 1,61 Fam229b                 | JUC1000007774.mm.1 | -2,89 | 0,012487 | 0,435429 |                     |      |
| TC1000002017.mm.1 | 1,61 Fam229b                 | JUC1000007778.mm.1 | -3,39 | 0,031369 | 0,516345 |                     |      |
| TC0X00001243.mm.1 | -1,04 Gm382                  | JUC0X00003796.mm.1 | -2,03 | 0,029219 | 0,509532 |                     |      |
| TC0400003200.mm.1 | 1,05 Pcsk9                   | JUC0400013206.mm.1 | -2,03 | 0,025464 | 0,497569 |                     |      |
| TC0900002276.mm.1 | 1,01 2310030G06Rik           | JUC0900010699.mm.1 | -2,03 | 0,015468 | 0,454312 |                     |      |
| TC0900002175.mm.1 | 1,07 Arcn1                   | JUC0900010202.mm.1 | -2,03 | 0,048955 | 0,5618   |                     |      |
| TC0600003116.mm.1 | 12,17 Eno2                   | PSR0600024173.mm.1 | -2,04 | 0,000697 | 0,305429 |                     |      |
| TC0600003116.mm.1 | 12,17 Eno2                   | JUC0600012590.mm.1 | -2,09 | 0,036986 | 0,532502 |                     |      |
| TC0600003116.mm.1 | 12,17 Eno2                   | PSR0600024179.mm.1 | -2,31 | 0,000665 | 0,304044 | Cassette Exon       | 0,35 |
| TC0600003116.mm.1 | 12,17 Eno2                   | JUC0600012587.mm.1 | -2,99 | 0,000006 | 0,179072 |                     |      |
| TC0600003116.mm.1 | 12,17 Eno2                   | PSR0600024188.mm.1 | -3,02 | 0,008356 | 0,406435 | Cassette Exon       | 0,21 |
| TC0600003116.mm.1 | 12,17 Eno2                   | PSR0600024151.mm.1 | -3,15 | 0,005011 | 0,373851 | Alternative 3' Acce | 0,34 |
| TC0600003116.mm.1 | 12,17 Eno2                   | JUC0600012595.mm.1 | -3,25 | 0,003424 | 0,355303 |                     |      |
| TC0600003116.mm.1 | 12,17 Eno2                   | JUC0600012591.mm.1 | -3,4  | 0,007979 | 0,403853 |                     |      |
| TC0600003116.mm.1 | 12,17 Eno2                   | JUC0600012600.mm.1 | -3,86 | 0,006989 | 0,395722 |                     |      |
| TC0600003116.mm.1 | 12,17 Eno2                   | JUC0600012603.mm.1 | -4,16 | 0,009332 | 0,414973 |                     |      |
| TC0600003116.mm.1 | 12,17 Eno2                   | PSR0600024169.mm.1 | -5,02 | 0,003279 | 0,354243 | Alternative 3' Acce | 0,54 |
| TC0600003116.mm.1 | 12,17 Eno2                   | JUC0600012601.mm.1 | -5,51 | 0,013644 | 0,444265 |                     |      |

|                   |       |               |                    |        |          |          |                     |      |
|-------------------|-------|---------------|--------------------|--------|----------|----------|---------------------|------|
| TC0600003116.mm.1 | 12,17 | Eno2          | PSR0600024180.mm.1 | -5,55  | 0,000654 | 0,304044 | Alternative 3' Acce | 0,48 |
| TC0600003116.mm.1 | 12,17 | Eno2          | PSR0600024174.mm.1 | -5,82  | 0,002621 | 0,349612 | Alternative 3' Acce | 0,34 |
| TC0600003116.mm.1 | 12,17 | Eno2          | PSR0600024187.mm.1 | -6,35  | 0,003649 | 0,356935 | Alternative 3' Acce | 0,16 |
| TC0600003116.mm.1 | 12,17 | Eno2          | PSR0600024192.mm.1 | -6,45  | 0,004984 | 0,373851 | Alternative 5' Donc | 0,16 |
| TC0600003116.mm.1 | 12,17 | Eno2          | PSR0600024164.mm.1 | -6,8   | 0,003938 | 0,359818 | Alternative 5' Donc | 0,42 |
| TC0600003116.mm.1 | 12,17 | Eno2          | JUC0600012598.mm.1 | -8,04  | 0,00215  | 0,343679 |                     |      |
| TC0600003116.mm.1 | 12,17 | Eno2          | PSR0600024163.mm.1 | -8,38  | 0,00486  | 0,371692 | Alternative 5' Donc | 0,42 |
| TC0600003116.mm.1 | 12,17 | Eno2          | PSR0600024175.mm.1 | -8,84  | 0,002176 | 0,344453 | Alternative 3' Acce | 0,34 |
| TC0600003116.mm.1 | 12,17 | Eno2          | PSR0600024155.mm.1 | -8,9   | 0,000991 | 0,316265 | Intron Retention    | 0,68 |
| TC0600003116.mm.1 | 12,17 | Eno2          | PSR0600024181.mm.1 | -9,03  | 0,003275 | 0,354243 | Alternative 3' Acce | 0,48 |
| TC0600003116.mm.1 | 12,17 | Eno2          | PSR0600024159.mm.1 | -9,1   | 0,004252 | 0,363417 | Intron Retention    | 0,75 |
| TC0600003116.mm.1 | 12,17 | Eno2          | PSR0600024162.mm.1 | -9,77  | 0,001141 | 0,317344 | Alternative 5' Donc | 0,42 |
| TC0600003116.mm.1 | 12,17 | Eno2          | PSR0600024185.mm.1 | -10,23 | 0,004752 | 0,371039 | Alternative 5' Donc | 0,46 |
| TC0600003116.mm.1 | 12,17 | Eno2          | PSR0600024186.mm.1 | -10,63 | 0,003362 | 0,354278 | Alternative 5' Donc | 0,46 |
| TC0600003116.mm.1 | 12,17 | Eno2          | PSR0600024194.mm.1 | -11,39 | 0,001398 | 0,325997 | Alternative 5' Donc | 0,16 |
| TC0600003116.mm.1 | 12,17 | Eno2          | JUC0600012599.mm.1 | -12,95 | 0,001015 | 0,316361 |                     |      |
| TC1500000528.mm.1 | 4,45  | Bai1; Gm26117 | JUC1500002196.mm.1 | -2,04  | 0,001361 | 0,32572  |                     |      |
| TC1500000528.mm.1 | 4,45  | Bai1; Gm26117 | PSR1500003713.mm.1 | -2,46  | 0,009076 | 0,412827 | Cassette Exon       | 0,14 |
| TC1500000528.mm.1 | 4,45  | Bai1; Gm26117 | PSR1500003695.mm.1 | -3,1   | 0,019036 | 0,471877 |                     |      |
| TC1500000528.mm.1 | 4,45  | Bai1; Gm26117 | PSR1500003684.mm.1 | -3,41  | 0,005519 | 0,380501 | Cassette Exon       | 0,49 |
| TC1500000528.mm.1 | 4,45  | Bai1; Gm26117 | JUC1500002192.mm.1 | -3,46  | 0,040064 | 0,541386 |                     |      |
| TC1500000528.mm.1 | 4,45  | Bai1; Gm26117 | PSR1500003701.mm.1 | -3,5   | 0,002901 | 0,352207 | Cassette Exon       | 0,37 |
| TC1500000528.mm.1 | 4,45  | Bai1; Gm26117 | PSR1500003692.mm.1 | -3,52  | 0,000049 | 0,24627  | Cassette Exon       | 0,38 |
| TC1500000528.mm.1 | 4,45  | Bai1; Gm26117 | PSR1500003705.mm.1 | -3,53  | 0,00058  | 0,304044 | Cassette Exon       | 0,37 |
| TC1500000528.mm.1 | 4,45  | Bai1; Gm26117 | PSR1500003718.mm.1 | -3,72  | 0,012288 | 0,434238 | Cassette Exon       | 0,39 |
| TC1500000528.mm.1 | 4,45  | Bai1; Gm26117 | PSR1500003702.mm.1 | -3,72  | 0,002824 | 0,352207 | Cassette Exon       | 0,23 |
| TC1500000528.mm.1 | 4,45  | Bai1; Gm26117 | JUC1500002177.mm.1 | -3,91  | 0,002841 | 0,352207 |                     |      |
| TC1500000528.mm.1 | 4,45  | Bai1; Gm26117 | PSR1500003690.mm.1 | -3,93  | 0,004768 | 0,371039 | Cassette Exon       | 0,32 |
| TC1500000528.mm.1 | 4,45  | Bai1; Gm26117 | PSR1500003697.mm.1 | -3,94  | 0,006466 | 0,390452 |                     |      |
| TC1500000528.mm.1 | 4,45  | Bai1; Gm26117 | PSR1500003693.mm.1 | -3,96  | 0,015118 | 0,452652 | Cassette Exon       | 0,38 |
| TC1500000528.mm.1 | 4,45  | Bai1; Gm26117 | PSR1500003710.mm.1 | -4,03  | 0,003714 | 0,357586 | Alternative 3' Acce | 0,48 |
| TC1500000528.mm.1 | 4,45  | Bai1; Gm26117 | PSR1500003685.mm.1 | -4,06  | 0,008352 | 0,406435 | Cassette Exon       | 0,55 |
| TC1500000528.mm.1 | 4,45  | Bai1; Gm26117 | JUC1500002169.mm.1 | -4,17  | 0,019649 | 0,474887 |                     |      |
| TC1500000528.mm.1 | 4,45  | Bai1; Gm26117 | JUC1500002168.mm.1 | -4,32  | 0,014089 | 0,446971 |                     |      |
| TC1500000528.mm.1 | 4,45  | Bai1; Gm26117 | PSR1500003717.mm.1 | -4,6   | 0,003311 | 0,354243 | Cassette Exon       | 0,46 |
| TC1500000528.mm.1 | 4,45  | Bai1; Gm26117 | PSR1500003678.mm.1 | -4,87  | 0,00254  | 0,349501 | Cassette Exon       | 0,28 |
| TC1500000528.mm.1 | 4,45  | Bai1; Gm26117 | PSR1500003709.mm.1 | -4,93  | 0,002638 | 0,349612 | Cassette Exon       | 0,15 |
| TC1500000528.mm.1 | 4,45  | Bai1; Gm26117 | JUC1500002200.mm.1 | -4,94  | 0,006233 | 0,38825  |                     |      |
| TC1500000528.mm.1 | 4,45  | Bai1; Gm26117 | PSR1500003676.mm.1 | -4,99  | 0,001045 | 0,316361 | Cassette Exon       | 0,55 |
| TC1500000528.mm.1 | 4,45  | Bai1; Gm26117 | PSR1500003677.mm.1 | -5,14  | 0,005026 | 0,374176 | Cassette Exon       | 0,41 |
| TC1500000528.mm.1 | 4,45  | Bai1; Gm26117 | PSR1500003696.mm.1 | -5,15  | 0,014711 | 0,45037  | Alternative 3' Acce | 0,01 |
| TC1500000528.mm.1 | 4,45  | Bai1; Gm26117 | PSR1500003689.mm.1 | -5,26  | 0,007695 | 0,402552 | Cassette Exon       | 0,41 |
| TC1500000528.mm.1 | 4,45  | Bai1; Gm26117 | PSR1500003698.mm.1 | -5,4   | 0,007719 | 0,402552 | Alternative 5' Donc | 0,01 |
| TC1500000528.mm.1 | 4,45  | Bai1; Gm26117 | PSR1500003680.mm.1 | -5,6   | 0,001141 | 0,317344 | Cassette Exon       | 0,41 |
| TC1500000528.mm.1 | 4,45  | Bai1; Gm26117 | PSR1500003691.mm.1 | -5,71  | 0,005401 | 0,378967 | Cassette Exon       | 0,41 |
| TC1500000528.mm.1 | 4,45  | Bai1; Gm26117 | PSR1500003675.mm.1 | -5,91  | 0,004082 | 0,362199 | Cassette Exon       | 0,41 |
| TC1500000528.mm.1 | 4,45  | Bai1; Gm26117 | PSR1500003712.mm.1 | -5,94  | 0,030084 | 0,511908 | Cassette Exon       | 0,28 |
| TC1500000528.mm.1 | 4,45  | Bai1; Gm26117 | JUC1500002179.mm.1 | -6,07  | 0,034664 | 0,52629  |                     |      |

|                   |                    |                    |       |          |                              |      |
|-------------------|--------------------|--------------------|-------|----------|------------------------------|------|
| TC1500000528.mm.1 | 4,45 Bai1; Gm26117 | PSR1500003694.mm.1 | -6,09 | 0,001364 | 0,32572 Cassette Exon        | 0,46 |
| TC1500000528.mm.1 | 4,45 Bai1; Gm26117 | JUC1500002189.mm.1 | -6,09 | 0,001216 | 0,322251                     |      |
| TC1500000528.mm.1 | 4,45 Bai1; Gm26117 | PSR1500003688.mm.1 | -6,26 | 0,006004 | 0,386556 Cassette Exon       | 0,55 |
| TC1500000528.mm.1 | 4,45 Bai1; Gm26117 | JUC1500002198.mm.1 | -6,82 | 0,003126 | 0,353892                     |      |
| TC1500000528.mm.1 | 4,45 Bai1; Gm26117 | PSR1500003681.mm.1 | -6,83 | 0,005321 | 0,378059 Cassette Exon       | 0,55 |
| TC1500000528.mm.1 | 4,45 Bai1; Gm26117 | JUC1500002172.mm.1 | -7,16 | 0,002818 | 0,352207                     |      |
| TC1500000528.mm.1 | 4,45 Bai1; Gm26117 | PSR1500003703.mm.1 | -7,31 | 0,003593 | 0,356223 Cassette Exon       | 0,31 |
| TC1500000528.mm.1 | 4,45 Bai1; Gm26117 | JUC1500002176.mm.1 | -7,58 | 0,001888 | 0,338712                     |      |
| TC1500000528.mm.1 | 4,45 Bai1; Gm26117 | JUC1500002199.mm.1 | -7,81 | 0,002283 | 0,34605                      |      |
| TC1500000528.mm.1 | 4,45 Bai1; Gm26117 | PSR1500003687.mm.1 | -8,51 | 0,000928 | 0,313363 Cassette Exon       | 0,54 |
| TC1500000528.mm.1 | 4,45 Bai1; Gm26117 | JUC1500002175.mm.1 | -8,96 | 0,020721 | 0,479166                     |      |
| TC1500000528.mm.1 | 4,45 Bai1; Gm26117 | JUC1500002178.mm.1 | -9    | 0,015782 | 0,455613                     |      |
| TC1500000528.mm.1 | 4,45 Bai1; Gm26117 | PSR1500003686.mm.1 | -9,35 | 0,001092 | 0,317225 Cassette Exon       | 0,54 |
| TC1500000528.mm.1 | 4,45 Bai1; Gm26117 | JUC1500002185.mm.1 | -9,69 | 0,003324 | 0,354243                     |      |
| TC0X00000126.mm.1 | 2 Tspan7           | PSR0X00000859.mm.1 | -2,04 | 0,027064 | 0,502979 Alternative 3' Acce | 0,06 |
| TC0X00000126.mm.1 | 2 Tspan7           | PSR0X00000870.mm.1 | -2,57 | 0,019953 | 0,476085 Intron Retention    | 0,38 |
| TC0500001620.mm.1 | 2,91 Ache          | JUC0500007994.mm.1 | -2,04 | 0,04137  | 0,544518                     |      |
| TC0500001620.mm.1 | 2,91 Ache          | PSR0500014663.mm.1 | -2,08 | 0,03608  | 0,529704 Alternative 3' Acce | 0,07 |
| TC0500001620.mm.1 | 2,91 Ache          | JUC0500007993.mm.1 | -2,7  | 0,000674 | 0,304338                     |      |
| TC0500001620.mm.1 | 2,91 Ache          | JUC0500007997.mm.1 | -3,2  | 0,043161 | 0,548752                     |      |
| TC0500001620.mm.1 | 2,91 Ache          | PSR0500014657.mm.1 | -3,21 | 0,017295 | 0,46317 Cassette Exon        | 0,32 |
| TC0500001620.mm.1 | 2,91 Ache          | PSR0500014675.mm.1 | -3,23 | 0,005463 | 0,379939 Alternative 5' Donc | 0,23 |
| TC0500001620.mm.1 | 2,91 Ache          | JUC0500007989.mm.1 | -3,64 | 0,019395 | 0,47375                      |      |
| TC0500001620.mm.1 | 2,91 Ache          | JUC0500007996.mm.1 | -4,37 | 0,000341 | 0,289576                     |      |
| TC0300000732.mm.1 | 1,32 Arhgef2       | PSR0300005194.mm.1 | -2,04 | 0,047656 | 0,558801 Alternative 3' Acce | 0,06 |
| TC0300000732.mm.1 | 1,32 Arhgef2       | PSR0300005191.mm.1 | -2,12 | 0,010028 | 0,41878 Cassette Exon        | 0,11 |
| TC0300000732.mm.1 | 1,32 Arhgef2       | PSR0300005187.mm.1 | -2,15 | 0,016751 | 0,460378 Cassette Exon       | 0,15 |
| TC0300000732.mm.1 | 1,32 Arhgef2       | PSR0300005206.mm.1 | -2,22 | 0,025988 | 0,499207 Alternative 3' Acce | 0,18 |
| TC0300000732.mm.1 | 1,32 Arhgef2       | PSR0300005267.mm.1 | -2,23 | 0,007797 | 0,403089 Intron Retention    | 0,31 |
| TC0300000732.mm.1 | 1,32 Arhgef2       | JUC0300002772.mm.1 | -2,4  | 0,023236 | 0,490032                     |      |
| TC0300000732.mm.1 | 1,32 Arhgef2       | PSR0300005202.mm.1 | -2,65 | 0,015171 | 0,452699 Cassette Exon       | 0,13 |
| TC0300000732.mm.1 | 1,32 Arhgef2       | PSR0300005189.mm.1 | -2,81 | 0,019041 | 0,471937 Alternative 3' Acce | 0,18 |
| TC0200002386.mm.1 | 1,93 Phf20         | JUC0200009711.mm.1 | -2,04 | 0,019872 | 0,475704                     |      |
| TC0200002386.mm.1 | 1,93 Phf20         | PSR0200019169.mm.1 | -2,13 | 0,000067 | 0,250119 Cassette Exon       | 0,04 |
| TC0200002386.mm.1 | 1,93 Phf20         | PSR0200019175.mm.1 | -2,31 | 0,01065  | 0,422925 Intron Retention    | 0,29 |
| TC0200002386.mm.1 | 1,93 Phf20         | PSR0200019178.mm.1 | -2,48 | 0,013973 | 0,446239 Cassette Exon       | 0,12 |
| TC0200002386.mm.1 | 1,93 Phf20         | PSR0200019196.mm.1 | -2,5  | 0,040388 | 0,541998 Cassette Exon       | 0,11 |
| TC0200002386.mm.1 | 1,93 Phf20         | PSR0200019181.mm.1 | -2,53 | 0,003598 | 0,356223 Alternative 3' Acce | 0,19 |
| TC0200002386.mm.1 | 1,93 Phf20         | PSR0200019163.mm.1 | -2,61 | 0,000921 | 0,313363 Cassette Exon       | 0,19 |
| TC0200002386.mm.1 | 1,93 Phf20         | JUC0200009724.mm.1 | -3    | 0,001886 | 0,338712                     |      |
| TC0200002386.mm.1 | 1,93 Phf20         | JUC0200009727.mm.1 | -3,3  | 0,00326  | 0,354243                     |      |
| TC1100001938.mm.1 | 2,1 Gm11744        | PSR1100018415.mm.1 | -2,04 | 0,005338 | 0,378059 Cassette Exon       | 0,12 |
| TC1100001938.mm.1 | 2,1 Gm11744        | PSR1100018418.mm.1 | -2,2  | 0,036031 | 0,529581 Alternative 3' Acce | 0,19 |
| TC1100001938.mm.1 | 2,1 Gm11744        | JUC1100009600.mm.1 | -2,54 | 0,008116 | 0,405267                     |      |
| TC1100001938.mm.1 | 2,1 Gm11744        | PSR1100018416.mm.1 | -2,62 | 0,002861 | 0,352207 Cassette Exon       | 0,22 |
| TC1100001938.mm.1 | 2,1 Gm11744        | PSR1100018425.mm.1 | -2,68 | 0,018214 | 0,4676 Alternative 5' Donc   | 0,27 |
| TC1000001192.mm.1 | -1,09 Epyc         | PSR1000008972.mm.1 | -2,04 | 0,017001 | 0,461553 Cassette Exon       | 0,23 |
| TC1000001192.mm.1 | -1,09 Epyc         | JUC1000004832.mm.1 | -5,1  | 0,041111 | 0,543948                     |      |

|                   |                               |                    |       |          |                              |      |
|-------------------|-------------------------------|--------------------|-------|----------|------------------------------|------|
| TC0100003531.mm.1 | 2,92 Pcp4l1                   | PSR0100028875.mm.1 | -2,04 | 0,02049  | 0,478019 Cassette Exon       | 0,1  |
| TC0100003531.mm.1 | 2,92 Pcp4l1                   | JUC0100016449.mm.1 | -2,25 | 0,044074 | 0,550884                     |      |
| TC0100003531.mm.1 | 2,92 Pcp4l1                   | PSR0100028876.mm.1 | -2,75 | 0,026943 | 0,502714 Cassette Exon       | 0,22 |
| TC0400001957.mm.1 | 1,83 Clstn1                   | JUC0400008429.mm.1 | -2,04 | 0,013828 | 0,445221                     |      |
| TC0400001957.mm.1 | 1,83 Clstn1                   | PSR0400016041.mm.1 | -2,76 | 0,030946 | 0,514624 Alternative 3' Acce | 0,19 |
| TC0500000434.mm.1 | 1,93 Lyar                     | PSR0500004317.mm.1 | -2,04 | 0,035996 | 0,529506 Alternative 5' Donc | 0,15 |
| TC0500000434.mm.1 | 1,93 Lyar                     | PSR0500004309.mm.1 | -2,27 | 0,014566 | 0,449757 Alternative 5' Donc | 0,19 |
| TC0500000434.mm.1 | 1,93 Lyar                     | JUC0500002410.mm.1 | -3,4  | 0,020179 | 0,477086                     |      |
| TC1800001740.mm.1 | 1,74 Pcdhac1; Pcdhac2; Pcdha4 | PSR1800002716.mm.1 | -2,04 | 0,011368 | 0,427487                     |      |
| TC1800001740.mm.1 | 1,74 Pcdhac1; Pcdhac2; Pcdha4 | PSR1800002729.mm.1 | -2,16 | 0,008356 | 0,406435 Cassette Exon       | 0,08 |
| TC1800001740.mm.1 | 1,74 Pcdhac1; Pcdhac2; Pcdha4 | PSR1800002709.mm.1 | -2,41 | 0,037915 | 0,535116 Alternative 3' Acce | 0,19 |
| TC1800001740.mm.1 | 1,74 Pcdhac1; Pcdhac2; Pcdha4 | JUC1800001583.mm.1 | -2,59 | 0,008851 | 0,410388                     |      |
| TC1800001740.mm.1 | 1,74 Pcdhac1; Pcdhac2; Pcdha4 | JUC1800001584.mm.1 | -2,73 | 0,004867 | 0,371692                     |      |
| TC1800001740.mm.1 | 1,74 Pcdhac1; Pcdhac2; Pcdha4 | JUC1800001577.mm.1 | -2,84 | 0,020302 | 0,477245                     |      |
| TC1800001740.mm.1 | 1,74 Pcdhac1; Pcdhac2; Pcdha4 | JUC1800001582.mm.1 | -3,47 | 0,031803 | 0,517645                     |      |
| TC1800001740.mm.1 | 1,74 Pcdhac1; Pcdhac2; Pcdha4 | JUC1800001571.mm.1 | -3,88 | 0,032317 | 0,519155                     |      |
| TC1800001740.mm.1 | 1,74 Pcdhac1; Pcdhac2; Pcdha4 | JUC1800001570.mm.1 | -3,95 | 0,025544 | 0,497801                     |      |
| TC1800001740.mm.1 | 1,74 Pcdhac1; Pcdhac2; Pcdha4 | JUC1800001579.mm.1 | -5,07 | 0,030061 | 0,511847                     |      |
| TC0200002415.mm.1 | 1,39 Ctnnbl1                  | JUC0200009921.mm.1 | -2,04 | 0,024502 | 0,493992                     |      |
| TC0200002415.mm.1 | 1,39 Ctnnbl1                  | PSR0200019593.mm.1 | -2,29 | 0,026116 | 0,499897 Alternative 5' Donc | 0,18 |
| TC0200002986.mm.1 | -1,27 Cubn                    | JUC0200012500.mm.1 | -2,04 | 0,030995 | 0,5148                       |      |
| TC0200002986.mm.1 | -1,27 Cubn                    | JUC0200012495.mm.1 | -2,81 | 0,02279  | 0,488201                     |      |
| TC0200002986.mm.1 | -1,27 Cubn                    | PSR0200024687.mm.1 | -2,98 | 0,0035   | 0,355638 Cassette Exon       | 0,17 |
| TC0500003369.mm.1 | 1,03 Gtf2i                    | PSR0500030348.mm.1 | -2,04 | 0,010776 | 0,423955 Alternative 5' Donc | 0,17 |
| TC0X00000072.mm.1 | 1,37 Kcnd1                    | PSR0X00000513.mm.1 | -2,04 | 0,016345 | 0,458641 Alternative 3' Acce | 0,17 |
| TC0X00000072.mm.1 | 1,37 Kcnd1                    | PSR0X00000509.mm.1 | -2,55 | 0,002012 | 0,341091 Cassette Exon       | 0,15 |
| TC0100003397.mm.1 | 1,07 Prrc2c                   | JUC0100015922.mm.1 | -2,04 | 0,01362  | 0,444002                     |      |
| TC0100003397.mm.1 | 1,07 Prrc2c                   | PSR0100027822.mm.1 | -2,06 | 0,029015 | 0,508842 Alternative 5' Donc | 0,11 |
| TC0100003397.mm.1 | 1,07 Prrc2c                   | PSR0100027810.mm.1 | -2,12 | 0,020674 | 0,478862 Alternative 3' Acce | 0,13 |
| TC0100003397.mm.1 | 1,07 Prrc2c                   | PSR0100027831.mm.1 | -2,31 | 0,000015 | 0,18968 Alternative 5' Donc  | 0,16 |
| TC0100003397.mm.1 | 1,07 Prrc2c                   | JUC0100015909.mm.1 | -2,43 | 0,010882 | 0,424197                     |      |
| TC0300002068.mm.1 | 1,29 Gpr149                   | PSR0300015604.mm.1 | -2,04 | 0,000792 | 0,310881 Alternative 5' Donc | 0,16 |
| TC0400002475.mm.1 | 1,75 Cntfr                    | PSR0400019998.mm.1 | -2,04 | 0,01554  | 0,454617 Cassette Exon       | 0,16 |
| TC0400002475.mm.1 | 1,75 Cntfr                    | JUC0400010408.mm.1 | -2,1  | 0,012347 | 0,43457                      |      |
| TC0400002475.mm.1 | 1,75 Cntfr                    | JUC0400010411.mm.1 | -2,35 | 0,005578 | 0,381035                     |      |
| TC0400002475.mm.1 | 1,75 Cntfr                    | JUC0400010412.mm.1 | -2,48 | 0,007767 | 0,402774                     |      |
| TC0900002519.mm.1 | 1,42 Trip4                    | JUC0900011898.mm.1 | -2,04 | 0,028029 | 0,505851                     |      |
| TC0900002519.mm.1 | 1,42 Trip4                    | JUC0900011880.mm.1 | -2,22 | 0,041474 | 0,544734                     |      |
| TC0900002519.mm.1 | 1,42 Trip4                    | JUC0900011882.mm.1 | -2,29 | 0,039548 | 0,539764                     |      |
| TC0900002519.mm.1 | 1,42 Trip4                    | PSR0900021097.mm.1 | -2,67 | 0,029083 | 0,509063 Cassette Exon       | 0,16 |
| TC0900002519.mm.1 | 1,42 Trip4                    | JUC0900011886.mm.1 | -2,78 | 0,03984  | 0,540922                     |      |
| TC0Y00000059.mm.1 | 1,3 Gm21242; Gm21065; Ssty    | PSR0Y00000321.mm.1 | -2,04 | 0,040849 | 0,543284 Alternative 5' Donc | 0,16 |
| TC0Y00000434.mm.1 | 1,3 Ssty2; Gm21242; Gm2106    | PSR0Y00002383.mm.1 | -2,04 | 0,040849 | 0,543284 Alternative 3' Acce | 0,16 |
| TC1200001314.mm.1 | 1,81 Rapgef5                  | PSR1200009493.mm.1 | -2,04 | 0,001973 | 0,340754 Cassette Exon       | 0,11 |
| TC1200001314.mm.1 | 1,81 Rapgef5                  | PSR1200009497.mm.1 | -2,16 | 0,040102 | 0,541437 Cassette Exon       | 0,12 |
| TC1200001314.mm.1 | 1,81 Rapgef5                  | PSR1200009495.mm.1 | -2,76 | 0,042215 | 0,546983 Cassette Exon       | 0,16 |
| TC0400000496.mm.1 | -1,18 1300002K09Rik           | PSR0400003535.mm.1 | -2,04 | 0,016052 | 0,457283 Alternative 5' Donc | 0,15 |
| TC1800001026.mm.1 | 2,77 Cdh2                     | PSR1800007622.mm.1 | -2,04 | 0,013669 | 0,444535 Alternative 3' Acce | 0,13 |

|                   |                     |                    |       |          |                              |      |
|-------------------|---------------------|--------------------|-------|----------|------------------------------|------|
| TC1800001026.mm.1 | 2,77 Cdh2           | PSR1800007624.mm.1 | -2,29 | 0,036021 | 0,529546 Cassette Exon       | 0,15 |
| TC1800001026.mm.1 | 2,77 Cdh2           | PSR1800007626.mm.1 | -2,72 | 0,017124 | 0,46232 Cassette Exon        | 0,15 |
| TC0400001250.mm.1 | 1,49 Pik3r3         | PSR0400009267.mm.1 | -2,04 | 0,009148 | 0,413447 Alternative 5' Donc | 0,14 |
| TC0200003320.mm.1 | 1,39 Ralgps1        | PSR0200028454.mm.1 | -2,04 | 0,031929 | 0,518048 Alternative 5' Donc | 0,13 |
| TC0200003320.mm.1 | 1,39 Ralgps1        | JUC0200014354.mm.1 | -2,69 | 0,03405  | 0,524583                     |      |
| TC0800001201.mm.1 | 1,06 Ces3b          | PSR0800009406.mm.1 | -2,04 | 0,028229 | 0,506368 Cassette Exon       | 0,13 |
| TC0300000656.mm.1 | -1,38 Tmem154       | PSR0300004337.mm.1 | -2,04 | 0,015928 | 0,456754 Cassette Exon       | 0,12 |
| TC0800001547.mm.1 | 1,78 Arv1           | PSR0800012701.mm.1 | -2,04 | 0,002444 | 0,349135 Cassette Exon       | 0,12 |
| TC0800001547.mm.1 | 1,78 Arv1           | PSR0800012700.mm.1 | -2,04 | 0,001938 | 0,340349 Cassette Exon       | 0,11 |
| TC0100001546.mm.1 | 1,05                | PSR0100012710.mm.1 | -2,04 | 0,032205 | 0,51885 Alternative 3' Acce  | 0,11 |
| TC0500002518.mm.1 | 1,14 Uchl1os        | PSR0500022456.mm.1 | -2,04 | 0,013978 | 0,446242 Cassette Exon       | 0,11 |
| TC0800002107.mm.1 | 1,52 Cnot7          | PSR0800016185.mm.1 | -2,04 | 0,020659 | 0,478862 Alternative 3' Acce | 0,11 |
| TC0X00001286.mm.1 | 1,28 Armcx1         | PSR0X00008041.mm.1 | -2,04 | 0,031732 | 0,517489 Intron Retention    | 0,11 |
| TC0300000233.mm.1 | 1,67 Ttc14          | PSR0300001432.mm.1 | -2,04 | 0,006669 | 0,393187 Alternative 3' Acce | 0,1  |
| TC0300000233.mm.1 | 1,67 Ttc14          | JUC0300000724.mm.1 | -3,03 | 0,010666 | 0,423012                     |      |
| TC0700001698.mm.1 | -1,14 Tmc5          | PSR0700014138.mm.1 | -2,04 | 0,040291 | 0,541823 Cassette Exon       | 0,1  |
| TC0700002873.mm.1 | 1,14 Uri1           | PSR0700025692.mm.1 | -2,04 | 0,007061 | 0,396462 Cassette Exon       | 0,1  |
| TC0700003592.mm.1 | 1,77 Man2a2         | PSR0700030431.mm.1 | -2,04 | 0,025883 | 0,498873 Cassette Exon       | 0,1  |
| TC0700003592.mm.1 | 1,77 Man2a2         | JUC0700016038.mm.1 | -2,32 | 0,006172 | 0,387873                     |      |
| TC0200004980.mm.1 | -1,02 Fer1l4        | PSR0200042397.mm.1 | -2,04 | 0,017185 | 0,462373 Cassette Exon       | 0,09 |
| TC0200004980.mm.1 | -1,02 Fer1l4        | JUC0200021908.mm.1 | -3,02 | 0,04245  | 0,547627                     |      |
| TC0400000911.mm.1 | -1,34 LOC102637866  | PSR0400006119.mm.1 | -2,04 | 0,018879 | 0,471134 Cassette Exon       | 0,09 |
| TC0400003206.mm.1 | 1,61 Ttc4           | PSR0400025419.mm.1 | -2,04 | 0,010992 | 0,425398 Cassette Exon       | 0,08 |
| TC0400003206.mm.1 | 1,61 Ttc4           | JUC0400013242.mm.1 | -2,35 | 0,010483 | 0,421891                     |      |
| TC1700002804.mm.1 | -1,12 Pigq          | PSR1700015554.mm.1 | -2,04 | 0,017316 | 0,463282 Alternative 3' Acce | 0,04 |
| TC0200003318.mm.1 | -1,12 Garnl3        | JUC0200014338.mm.1 | -2,04 | 0,015057 | 0,452223                     |      |
| TC0200002728.mm.1 | 1,72 Gm2020         | JUC0200011298.mm.1 | -2,04 | 0,001425 | 0,327447                     |      |
| TC1100003992.mm.1 | 1,16 Wipi1          | JUC1100019521.mm.1 | -2,04 | 0,0361   | 0,529729                     |      |
| TC1300000280.mm.1 | 1,43 Tdp2           | JUC1300000838.mm.1 | -2,04 | 0,001859 | 0,337661                     |      |
| TC1300000904.mm.1 | -1,16 Erap1         | JUC1300003102.mm.1 | -2,04 | 0,013295 | 0,441721                     |      |
| TC0100003879.mm.1 | 1,41 Als2           | JUC0100011127.mm.1 | -2,04 | 0,01248  | 0,435429                     |      |
| TC1800000282.mm.1 | 1,26 Apc            | JUC1800001204.mm.1 | -2,04 | 0,042057 | 0,546262                     |      |
| TC0100003141.mm.1 | -1,07 Mroh3         | JUC0100014522.mm.1 | -2,04 | 0,007258 | 0,39826                      |      |
| TC1700002822.mm.1 | -1,18 H2-T22; H2-T9 | JUC1700010205.mm.1 | -2,04 | 0,016878 | 0,460797                     |      |
| TC0100001256.mm.1 | -1,15 Lad1          | JUC0100005946.mm.1 | -2,04 | 0,011199 | 0,426568                     |      |
| TC1500000398.mm.1 | 1,13 Mtbp           | JUC1500001619.mm.1 | -2,04 | 0,023146 | 0,489785                     |      |
| TC1700000618.mm.1 | 1,01 H2-DMA         | JUC1700003216.mm.1 | -2,04 | 0,038566 | 0,536789                     |      |
| TC0200000634.mm.1 | -1,37 Cntrl; Cep110 | JUC0200002925.mm.1 | -2,04 | 0,024726 | 0,494838                     |      |
| TC0800002023.mm.1 | 1,2 Leprotl1        | JUC0800008656.mm.1 | -2,04 | 0,026199 | 0,50003                      |      |
| TC0800001740.mm.1 | -1,02 Rasa3         | JUC0800007685.mm.1 | -2,04 | 0,015058 | 0,452223                     |      |
| TC0700004504.mm.1 | -1,03 Syce1         | JUC0700019940.mm.1 | -2,04 | 0,014165 | 0,447466                     |      |
| TC0800000648.mm.1 | 1,24 2700029M09Rik  | JUC0800002304.mm.1 | -2,04 | 0,006593 | 0,39213                      |      |
| TC0800000923.mm.1 | 1,15 Clgn           | JUC0800003625.mm.1 | -2,04 | 0,008808 | 0,409934                     |      |
| TC0500001132.mm.1 | 1,19 Chfr           | JUC0500005254.mm.1 | -2,04 | 0,04378  | 0,550398                     |      |
| TC0500001230.mm.1 | 1,2 Tchp            | JUC0500005791.mm.1 | -2,04 | 0,038719 | 0,537318                     |      |
| TC0600000598.mm.1 | 1,03 5430402O13Rik  | JUC0600002334.mm.1 | -2,04 | 0,033752 | 0,523605                     |      |
| TC1100000216.mm.1 | 1,11 Wdpcp          | JUC1100000927.mm.1 | -2,04 | 0,027677 | 0,504734                     |      |
| TC0400000479.mm.1 | 1,23 Gm12678        | JUC0400001625.mm.1 | -2,04 | 0,00592  | 0,384341                     |      |

|                   |                    |                    |        |          |                              |      |
|-------------------|--------------------|--------------------|--------|----------|------------------------------|------|
| TC0400001062.mm.1 | 1,08 Tctex1d1      | JUC0400003718.mm.1 | -2,04  | 0,030081 | 0,511908                     |      |
| TC0400001387.mm.1 | 1,14 Trit1         | JUC0400005448.mm.1 | -2,04  | 0,026749 | 0,502096                     |      |
| TC0X00000933.mm.1 | 1,04 Stard8        | JUC0X00002967.mm.1 | -2,04  | 0,030351 | 0,512923                     |      |
| TC0900002050.mm.1 | -1,08 Robo3        | JUC0900009654.mm.1 | -2,04  | 0,040665 | 0,542693                     |      |
| TC1000000746.mm.1 | 1,04 Ftcd          | JUC1000002954.mm.1 | -2,04  | 0,035196 | 0,528241                     |      |
| TC1000000852.mm.1 | 5,21 Reep6         | PSR1000006499.mm.1 | -2,05  | 0,004144 | 0,3623 Cassette Exon         | 0,19 |
| TC1000000852.mm.1 | 5,21 Reep6         | JUC1000003515.mm.1 | -3,24  | 0,004091 | 0,36228                      |      |
| TC1000000852.mm.1 | 5,21 Reep6         | PSR1000006493.mm.1 | -5,98  | 0,009445 | 0,416241 Alternative 3' Acce | 0,48 |
| TC1000000852.mm.1 | 5,21 Reep6         | PSR1000006495.mm.1 | -6,04  | 0,017223 | 0,462633 Alternative 3' Acce | 0,48 |
| TC1000000852.mm.1 | 5,21 Reep6         | JUC1000003516.mm.1 | -7,97  | 0,003849 | 0,358836                     |      |
| TC0900001379.mm.1 | 7,17               | PSR0900010867.mm.1 | -2,05  | 0,044675 | 0,55216 Alternative 3' Acce  | 0,21 |
| TC0900001379.mm.1 | 7,17               | PSR0900010879.mm.1 | -2,14  | 0,020674 | 0,478862 Cassette Exon       | 0,17 |
| TC0900001379.mm.1 | 7,17               | PSR0900010872.mm.1 | -2,17  | 0,048338 | 0,560493 Intron Retention    | 0,27 |
| TC0900001379.mm.1 | 7,17               | PSR0900010882.mm.1 | -4,26  | 0,009778 | 0,417839 Cassette Exon       | 0,41 |
| TC0900001379.mm.1 | 7,17               | JUC0900005979.mm.1 | -5,16  | 0,046785 | 0,55703                      |      |
| TC0900001379.mm.1 | 7,17               | JUC0900005978.mm.1 | -10,15 | 0,003447 | 0,3554                       |      |
| TC0900001379.mm.1 | 7,17               | JUC0900005981.mm.1 | -11,38 | 0,004534 | 0,368648                     |      |
| TC0900001379.mm.1 | 7,17               | JUC0900005975.mm.1 | -12,14 | 0,00248  | 0,349135                     |      |
| TC0900001379.mm.1 | 7,17               | JUC0900005982.mm.1 | -39,28 | 0,001172 | 0,319173                     |      |
| TC0900001379.mm.1 | 7,17               | JUC0900005977.mm.1 | -51,61 | 0,000351 | 0,290604                     |      |
| TC0600002562.mm.1 | 2,15 Wdr54         | PSR0600019872.mm.1 | -2,05  | 0,016597 | 0,459691 Intron Retention    | 0,26 |
| TC0600002562.mm.1 | 2,15 Wdr54         | PSR0600019886.mm.1 | -2,73  | 0,001955 | 0,340561 Intron Retention    | 0,39 |
| TC0700002866.mm.1 | 2,03 Zfp536        | JUC0700013698.mm.1 | -2,05  | 0,020874 | 0,479521                     |      |
| TC0700002866.mm.1 | 2,03 Zfp536        | PSR0700025662.mm.1 | -2,18  | 0,001254 | 0,322251 Cassette Exon       | 0,1  |
| TC0700002866.mm.1 | 2,03 Zfp536        | JUC0700013703.mm.1 | -2,18  | 0,007005 | 0,395737                     |      |
| TC0700002866.mm.1 | 2,03 Zfp536        | PSR0700025665.mm.1 | -2,27  | 0,00068  | 0,304417 Alternative 5' Donc | 0,09 |
| TC0700002866.mm.1 | 2,03 Zfp536        | PSR0700025667.mm.1 | -2,37  | 0,014785 | 0,45081 Cassette Exon        | 0,22 |
| TC0700002866.mm.1 | 2,03 Zfp536        | JUC0700013711.mm.1 | -2,45  | 0,004144 | 0,3623                       |      |
| TC0700002866.mm.1 | 2,03 Zfp536        | PSR0700025645.mm.1 | -2,52  | 0,023103 | 0,48975 Alternative 5' Donc  | 0,14 |
| TC0700002866.mm.1 | 2,03 Zfp536        | JUC0700013709.mm.1 | -2,53  | 0,000852 | 0,311909                     |      |
| TC0700002866.mm.1 | 2,03 Zfp536        | JUC0700013708.mm.1 | -2,93  | 0,002727 | 0,349612                     |      |
| TC0700002866.mm.1 | 2,03 Zfp536        | JUC0700013701.mm.1 | -3,43  | 0,03565  | 0,528956                     |      |
| TC0900001367.mm.1 | 1,55 Cacna2d2      | JUC0900005891.mm.1 | -2,05  | 0,020027 | 0,476453                     |      |
| TC0900001367.mm.1 | 1,55 Cacna2d2      | PSR0900010742.mm.1 | -2,15  | 0,020768 | 0,479303                     |      |
| TC0900001367.mm.1 | 1,55 Cacna2d2      | JUC0900005862.mm.1 | -2,21  | 0,017216 | 0,462603                     |      |
| TC0900001367.mm.1 | 1,55 Cacna2d2      | JUC0900005903.mm.1 | -2,21  | 0,008635 | 0,408463                     |      |
| TC0900001367.mm.1 | 1,55 Cacna2d2      | JUC0900005900.mm.1 | -2,52  | 0,004058 | 0,36184                      |      |
| TC0900001367.mm.1 | 1,55 Cacna2d2      | JUC0900005901.mm.1 | -2,65  | 0,044672 | 0,55216                      |      |
| TC0900001367.mm.1 | 1,55 Cacna2d2      | PSR0900010681.mm.1 | -2,79  | 0,004235 | 0,363295 Cassette Exon       | 0,22 |
| TC0900001367.mm.1 | 1,55 Cacna2d2      | JUC0900005906.mm.1 | -3,17  | 0,032057 | 0,518469                     |      |
| TC0900001367.mm.1 | 1,55 Cacna2d2      | JUC0900005904.mm.1 | -5,64  | 0,003954 | 0,359922                     |      |
| TC0600000648.mm.1 | 1,73 Chn2          | PSR0600004956.mm.1 | -2,05  | 0,011441 | 0,427685 Alternative 3' Acce | 0,14 |
| TC0600000648.mm.1 | 1,73 Chn2          | PSR0600004954.mm.1 | -2,49  | 0,014635 | 0,450098 Cassette Exon       | 0,16 |
| TC0600000648.mm.1 | 1,73 Chn2          | PSR0600004955.mm.1 | -2,63  | 0,034523 | 0,52593 Cassette Exon        | 0,15 |
| TC0600000648.mm.1 | 1,73 Chn2          | PSR0600004949.mm.1 | -3,49  | 0,017676 | 0,464879 Cassette Exon       | 0,19 |
| TC0500002045.mm.1 | 1,21 5031425E22Rik | JUC0500010148.mm.1 | -2,05  | 0,019652 | 0,474887                     |      |
| TC0500002045.mm.1 | 1,21 5031425E22Rik | PSR0500018613.mm.1 | -2,32  | 0,002067 | 0,341993 Cassette Exon       | 0,12 |
| TC0500002045.mm.1 | 1,21 5031425E22Rik | PSR0500018596.mm.1 | -2,91  | 0,039166 | 0,538679 Cassette Exon       | 0,18 |

|                   |                            |                    |       |          |                              |      |
|-------------------|----------------------------|--------------------|-------|----------|------------------------------|------|
| TC1000001895.mm.1 | -1,53 Enpp3                | JUC1000007434.mm.1 | -2,05 | 0,029022 | 0,508842                     |      |
| TC1000001895.mm.1 | -1,53 Enpp3                | PSR1000013653.mm.1 | -2,1  | 0,031219 | 0,515865 Alternative 3' Acce | 0,18 |
| TC1000001895.mm.1 | -1,53 Enpp3                | JUC1000007424.mm.1 | -3,92 | 0,012593 | 0,435933                     |      |
| TC0300000987.mm.1 | 1,08 Wars2                 | PSR0300007992.mm.1 | -2,05 | 0,042696 | 0,548097 Alternative 5' Donc | 0,17 |
| TC0300000987.mm.1 | 1,08 Wars2                 | PSR0300008000.mm.1 | -2,42 | 0,0056   | 0,381115 Cassette Exon       | 0,13 |
| TC0400002098.mm.1 | 1,2 Acap3                  | PSR0400017626.mm.1 | -2,05 | 0,033886 | 0,524166 Alternative 3' Acce | 0,17 |
| TC0400002236.mm.1 | 1,56 Otud6b                | PSR0400018672.mm.1 | -2,05 | 0,028412 | 0,507154 Alternative 3' Acce | 0,17 |
| TC0400004211.mm.1 | 1,11 Mup2; Mup10; Mup19; M | PSR0400022528.mm.1 | -2,05 | 0,010643 | 0,422925 Cassette Exon       | 0,17 |
| TC0700000035.mm.1 | 1,22 Gm15873               | JUC0700000227.mm.1 | -2,05 | 0,039634 | 0,540125                     |      |
| TC0700000035.mm.1 | 1,22 Gm15873               | PSR0700000469.mm.1 | -2,13 | 0,000487 | 0,298999 Alternative 3' Acce | 0,17 |
| TC1300002238.mm.1 | -1,1 4933433G19Rik         | PSR1300014503.mm.1 | -2,05 | 0,008169 | 0,405603 Alternative 3' Acce | 0,17 |
| TC0200004130.mm.1 | 1,06 Dgkz                  | PSR0200034607.mm.1 | -2,05 | 0,025158 | 0,496555 Alternative 5' Donc | 0,15 |
| TC0200004130.mm.1 | 1,06 Dgkz                  | PSR0200034614.mm.1 | -2,49 | 0,007584 | 0,401712 Cassette Exon       | 0,14 |
| TC0700003981.mm.1 | 1,91 Apbb1                 | JUC0700017455.mm.1 | -2,05 | 0,029679 | 0,510918                     |      |
| TC0700003981.mm.1 | 1,91 Apbb1                 | PSR0700033135.mm.1 | -2,17 | 0,010986 | 0,425397 Cassette Exon       | 0,15 |
| TC0700003981.mm.1 | 1,91 Apbb1                 | JUC0700017436.mm.1 | -2,7  | 0,049504 | 0,563325                     |      |
| TC0700003981.mm.1 | 1,91 Apbb1                 | JUC0700017445.mm.1 | -2,7  | 0,00726  | 0,39826                      |      |
| TC0700003981.mm.1 | 1,91 Apbb1                 | JUC0700017450.mm.1 | -2,77 | 0,021559 | 0,483034                     |      |
| TC0800001133.mm.1 | -1,12 Mmp15                | PSR0800008939.mm.1 | -2,05 | 0,00205  | 0,341391 Cassette Exon       | 0,15 |
| TC1100002124.mm.1 | 1,1 Gas2l1                 | PSR1100020651.mm.1 | -2,05 | 0,004492 | 0,368077 Alternative 3' Acce | 0,15 |
| TC1200001508.mm.1 | 2,57                       | PSR1200010551.mm.1 | -2,05 | 0,041213 | 0,544134 Cassette Exon       | 0,15 |
| TC1200001508.mm.1 | 2,57                       | JUC1200005819.mm.1 | -2,21 | 0,012218 | 0,433321                     |      |
| TC0900000523.mm.1 | 1,18 lft46                 | PSR0900003609.mm.1 | -2,05 | 0,012185 | 0,433072 Alternative 5' Donc | 0,14 |
| TC1100003780.mm.1 | -1,05 Kat2a                | PSR1100034819.mm.1 | -2,05 | 0,045455 | 0,554203 Cassette Exon       | 0,14 |
| TC1400002252.mm.1 | 2,03 Fzd3                  | PSR1400017379.mm.1 | -2,05 | 0,016511 | 0,459491 Cassette Exon       | 0,13 |
| TC1400002252.mm.1 | 2,03 Fzd3                  | JUC1400009501.mm.1 | -3,19 | 0,001445 | 0,328204                     |      |
| TC0600002486.mm.1 | 1,25 Rnf181                | PSR0600019248.mm.1 | -2,05 | 0,015933 | 0,456765 Intron Retention    | 0,12 |
| TC0700002347.mm.1 | 1,49 Zscan18               | PSR0700020842.mm.1 | -2,05 | 0,009826 | 0,417839 Cassette Exon       | 0,12 |
| TC0700000965.mm.1 | 1,37 Otud7a                | PSR0700008786.mm.1 | -2,05 | 0,018891 | 0,471219 Cassette Exon       | 0,1  |
| TC0700000965.mm.1 | 1,37 Otud7a                | JUC0700004479.mm.1 | -3,08 | 0,015318 | 0,453634                     |      |
| TC0700000965.mm.1 | 1,37 Otud7a                | JUC0700004481.mm.1 | -3,7  | 0,016106 | 0,457703                     |      |
| TC0700002260.mm.1 | -1,05 Vmn2r-ps46           | PSR0700020432.mm.1 | -2,05 | 0,022352 | 0,486348 Cassette Exon       | 0,1  |
| TC1100004040.mm.1 | 1,06 Sdk2                  | PSR1100037890.mm.1 | -2,05 | 0,035711 | 0,529027 Cassette Exon       | 0,1  |
| TC1100004040.mm.1 | 1,06 Sdk2                  | JUC1100019900.mm.1 | -2,57 | 0,017137 | 0,46232                      |      |
| TC1300000586.mm.1 | 1,17 Fbxw17                | PSR1300003681.mm.1 | -2,05 | 0,028789 | 0,508192 Cassette Exon       | 0,1  |
| TC0100002863.mm.1 | 2,04 D1Ertd622e            | JUC0100013161.mm.1 | -2,05 | 0,027929 | 0,505612                     |      |
| TC0100002863.mm.1 | 2,04 D1Ertd622e            | PSR0100023172.mm.1 | -2,17 | 0,005645 | 0,381706 Cassette Exon       | 0,09 |
| TC0100002863.mm.1 | 2,04 D1Ertd622e            | JUC0100013162.mm.1 | -4,06 | 0,029984 | 0,51154                      |      |
| TC0100001592.mm.1 | -1,44 F11r                 | PSR0100013160.mm.1 | -2,05 | 0,003719 | 0,357586 Alternative 5' Donc | 0,08 |
| TC1400001671.mm.1 | -1,04 Stab1                | JUC1400006931.mm.1 | -2,05 | 0,012891 | 0,438165                     |      |
| TC1400001671.mm.1 | -1,04 Stab1                | JUC1400006936.mm.1 | -2,53 | 0,003432 | 0,355303                     |      |
| TC0300000721.mm.1 | 1,88 Cct3                  | JUC0300002664.mm.1 | -2,05 | 0,019394 | 0,47375                      |      |
| TC0300000017.mm.1 | 1,06 Zfhx4                 | JUC0300000032.mm.1 | -2,05 | 0,006374 | 0,389488                     |      |
| TC1100004105.mm.1 | 1,15 Fbf1                  | JUC1100020297.mm.1 | -2,05 | 0,020521 | 0,478264                     |      |
| TC1200000486.mm.1 | -1,22 Prps113; Mipol1      | JUC1200001874.mm.1 | -2,05 | 0,034679 | 0,526294                     |      |
| TC1300002061.mm.1 | 1 Pdlim7; Mir6945; mmu-mi  | JUC1300006709.mm.1 | -2,05 | 0,038443 | 0,536405                     |      |
| TC1300002061.mm.1 | 1 Pdlim7; Mir6945; mmu-mi  | JUC1300006710.mm.1 | -2,38 | 0,03766  | 0,534288                     |      |
| TC1700001579.mm.1 | -1,54 Vmn2r-ps128          | JUC1700007517.mm.1 | -2,05 | 0,018237 | 0,467691                     |      |



|                   |                             |                     |       |          |          |                          |
|-------------------|-----------------------------|---------------------|-------|----------|----------|--------------------------|
| TC1700002175.mm.1 | -1,24 Slc22a7               | JUC1700010865.mm.1  | -2,05 | 0,022971 | 0,488823 |                          |
| TC1500001504.mm.1 | 1,25 Eif3h                  | JUC1500006418.mm.1  | -2,05 | 0,016117 | 0,457756 |                          |
| TC1500001504.mm.1 | 1,25 Eif3h                  | JUC1500006417.mm.1  | -2,26 | 0,025373 | 0,497403 |                          |
| TC1500002096.mm.1 | 1,39 Yaf2                   | JUC1500009580.mm.1  | -2,05 | 0,028249 | 0,506565 |                          |
| TC0100003282.mm.1 | -1,28 Rgsl1                 | JUC01000015263.mm.1 | -2,05 | 0,031528 | 0,517029 |                          |
| TC1700000429.mm.1 | -1,19 Zbtb9; Ggnbp1         | JUC1700002007.mm.1  | -2,05 | 0,023917 | 0,492323 |                          |
| TC1600001155.mm.1 | 1,05 Nagpa                  | JUC1600004830.mm.1  | -2,05 | 0,02563  | 0,49793  |                          |
| TC0800001194.mm.1 | -1,21 Ces2c                 | JUC0800004970.mm.1  | -2,05 | 0,008901 | 0,410728 |                          |
| TC0500001575.mm.1 | -1,21 Mxipl                 | JUC0500007707.mm.1  | -2,05 | 0,015529 | 0,454591 |                          |
| TC0900000561.mm.1 | 1,01 Apoa5                  | JUC0900002042.mm.1  | -2,05 | 0,021193 | 0,481078 |                          |
| TC0700000534.mm.1 | 1,06 Zfp30                  | JUC0700002312.mm.1  | -2,05 | 0,03268  | 0,520439 |                          |
| TC0700000534.mm.1 | 1,06 Zfp30                  | JUC0700002307.mm.1  | -3,36 | 0,009439 | 0,416119 |                          |
| TC0700000154.mm.1 | 1,3 Zfp446                  | JUC0700000563.mm.1  | -2,05 | 0,010017 | 0,418611 |                          |
| TC0700000154.mm.1 | 1,3 Zfp446                  | JUC0700000562.mm.1  | -2,69 | 0,018586 | 0,469618 |                          |
| TC0600002631.mm.1 | -1,09                       | JUC06000010575.mm.1 | -2,05 | 0,027982 | 0,505748 |                          |
| TC0600001736.mm.1 | 1,15 Stk38l                 | JUC0600007210.mm.1  | -2,05 | 0,00899  | 0,41198  |                          |
| TC1100001077.mm.1 | -1,11 Myo1c                 | JUC1100005210.mm.1  | -2,05 | 0,020843 | 0,479521 |                          |
| TC1100001077.mm.1 | -1,11 Myo1c                 | JUC1100005211.mm.1  | -2,17 | 0,002401 | 0,348564 |                          |
| TC1100002677.mm.1 | 1,08 Gm12200                | JUC1100012672.mm.1  | -2,05 | 0,047826 | 0,559283 |                          |
| TC1100003087.mm.1 | -1,16 Bcl6b                 | JUC1100014897.mm.1  | -2,05 | 0,047134 | 0,557915 |                          |
| TC1100001391.mm.1 | 1,01                        | JUC1100006841.mm.1  | -2,05 | 0,011325 | 0,427133 |                          |
| TC0400003321.mm.1 | -1,15 Cyp4b1                | JUC0400013800.mm.1  | -2,05 | 0,027401 | 0,503961 |                          |
| TC0900003089.mm.1 | -1,26 Fbxw15                | JUC0900014632.mm.1  | -2,05 | 0,047544 | 0,558701 |                          |
| TC0500000068.mm.1 | -1 Gm8871; Gm6465; Gm586    | JUC0500000348.mm.1  | -2,05 | 0,017243 | 0,462729 |                          |
| TC0500000068.mm.1 | -1 Gm8871; Gm6465; Gm586    | JUC0500000352.mm.1  | -2,05 | 0,017243 | 0,462729 |                          |
| TC0900002956.mm.1 | 1,38 Ephb1                  | JUC0900013557.mm.1  | -2,05 | 0,021955 | 0,485095 |                          |
| TC0900002956.mm.1 | 1,38 Ephb1                  | JUC0900013553.mm.1  | -2,19 | 0,000453 | 0,298307 |                          |
| TC0900002956.mm.1 | 1,38 Ephb1                  | JUC0900013565.mm.1  | -2,34 | 0,010808 | 0,424055 |                          |
| TC0900002956.mm.1 | 1,38 Ephb1                  | JUC0900013562.mm.1  | -2,39 | 0,029454 | 0,51008  |                          |
| TC0400001651.mm.1 | -1,14 Runx3                 | JUC0400006819.mm.1  | -2,05 | 0,018473 | 0,468729 |                          |
| TC0400001651.mm.1 | -1,14 Runx3                 | JUC0400006815.mm.1  | -2,18 | 0,021557 | 0,483034 |                          |
| TC0400002309.mm.1 | 1,71 Klhl32                 | JUC0400009944.mm.1  | -2,05 | 0,021302 | 0,481714 |                          |
| TC0400002309.mm.1 | 1,71 Klhl32                 | JUC0400009934.mm.1  | -2,35 | 0,001758 | 0,335996 |                          |
| TC0400002309.mm.1 | 1,71 Klhl32                 | JUC0400009937.mm.1  | -2,44 | 0,035384 | 0,528536 |                          |
| TC0400002309.mm.1 | 1,71 Klhl32                 | JUC0400009940.mm.1  | -2,52 | 0,003139 | 0,353892 |                          |
| TC0X00003166.mm.1 | 1,42 Tro                    | JUC0X00010030.mm.1  | -2,05 | 0,009681 | 0,417605 |                          |
| TC0X00003166.mm.1 | 1,42 Tro                    | JUC0X00010045.mm.1  | -2,06 | 0,035373 | 0,528536 |                          |
| TC0400001570.mm.1 | 2,05 Srsf4                  | PSR0400012356.mm.1  | -2,06 | 0,003268 | 0,354243 | Alternative 3' Acce 0,17 |
| TC0400001570.mm.1 | 2,05 Srsf4                  | PSR0400012362.mm.1  | -2,77 | 0,027609 | 0,504556 | Intron Retention 0,37    |
| TC0400001570.mm.1 | 2,05 Srsf4                  | JUC0400006457.mm.1  | -3,71 | 0,035878 | 0,52938  |                          |
| TC0X00002407.mm.1 | 3,31 Gabra3                 | PSR0X00014837.mm.1  | -2,06 | 0,010442 | 0,421595 | Cassette Exon 0,18       |
| TC0X00002407.mm.1 | 3,31 Gabra3                 | PSR0X00014849.mm.1  | -2,12 | 0,013713 | 0,444758 | Alternative 5' Donc 0,32 |
| TC0X00002407.mm.1 | 3,31 Gabra3                 | PSR0X00014835.mm.1  | -2,24 | 0,018017 | 0,466939 | Cassette Exon 0,16       |
| TC0X00002407.mm.1 | 3,31 Gabra3                 | JUC0X00007561.mm.1  | -2,73 | 0,006375 | 0,389488 |                          |
| TC0X00002407.mm.1 | 3,31 Gabra3                 | JUC0X00007568.mm.1  | -3,24 | 0,046326 | 0,556186 |                          |
| TC0X00002407.mm.1 | 3,31 Gabra3                 | JUC0X00007571.mm.1  | -4,01 | 0,02697  | 0,502831 |                          |
| TC0X00002407.mm.1 | 3,31 Gabra3                 | PSR0X00014850.mm.1  | -5,44 | 0,008714 | 0,409266 | Alternative 5' Donc 0,32 |
| TC0100001883.mm.1 | 2,31 A330023F24Rik; Mir29c; | PSR0100015665.mm.1  | -2,06 | 0,01525  | 0,452847 | Cassette Exon 0,25       |

|                   |      |                                             |       |          |          |                          |
|-------------------|------|---------------------------------------------|-------|----------|----------|--------------------------|
| TC0100001883.mm.1 | 2,31 | A330023F24Rik; Mir29c;   JUC0100008910.mm.1 | -2,08 | 0,006927 | 0,395156 |                          |
| TC0100001883.mm.1 | 2,31 | A330023F24Rik; Mir29c;   PSR0100015648.mm.1 | -2,25 | 0,027044 | 0,502979 | Cassette Exon 0,14       |
| TC0100001883.mm.1 | 2,31 | A330023F24Rik; Mir29c;   PSR0100015668.mm.1 | -2,3  | 0,008472 | 0,406734 | Alternative 5' Donc 0,21 |
| TC0100001883.mm.1 | 2,31 | A330023F24Rik; Mir29c;   JUC0100008909.mm.1 | -4,61 | 0,047763 | 0,559125 |                          |
| TC0100001883.mm.1 | 2,31 | A330023F24Rik; Mir29c;   JUC0100008913.mm.1 | -7,69 | 0,000027 | 0,229534 |                          |
| TC0200000465.mm.1 | 1,04 | Adamtsl2 PSR0200003129.mm.1                 | -2,06 | 0,049869 | 0,563773 | Intron Retention 0,25    |
| TC0200000465.mm.1 | 1,04 | Adamtsl2 JUC0200001492.mm.1                 | -2,17 | 0,027374 | 0,503961 |                          |
| TC0200000465.mm.1 | 1,04 | Adamtsl2 JUC0200001487.mm.1                 | -2,64 | 0,020849 | 0,479521 |                          |
| TC0200000465.mm.1 | 1,04 | Adamtsl2 JUC0200001505.mm.1                 | -3,24 | 0,031679 | 0,51741  |                          |
| TC0600000067.mm.1 | 2,54 | Nxph1 PSR0600000552.mm.1                    | -2,06 | 0,018484 | 0,46874  | Cassette Exon 0,25       |
| TC0600000067.mm.1 | 2,54 | Nxph1 JUC0600000290.mm.1                    | -2,38 | 0,038099 | 0,535633 |                          |
| TC0600000067.mm.1 | 2,54 | Nxph1 PSR0600000553.mm.1                    | -2,61 | 0,031961 | 0,518173 | Cassette Exon 0,21       |
| TC0600000067.mm.1 | 2,54 | Nxph1 PSR0600000548.mm.1                    | -2,71 | 0,023657 | 0,491292 | Alternative 3' Acce 0,17 |
| TC0600000067.mm.1 | 2,54 | Nxph1 PSR0600000551.mm.1                    | -2,95 | 0,014358 | 0,448293 | Cassette Exon 0,25       |
| TC0600000067.mm.1 | 2,54 | Nxph1 PSR0600000550.mm.1                    | -3,32 | 0,034067 | 0,524583 | Cassette Exon 0,25       |
| TC0400002244.mm.1 | 1,59 | Decr1 JUC0400009794.mm.1                    | -2,06 | 0,026074 | 0,499646 |                          |
| TC0400002244.mm.1 | 1,59 | Decr1 JUC0400009793.mm.1                    | -2,15 | 0,022685 | 0,48769  |                          |
| TC0400002244.mm.1 | 1,59 | Decr1 PSR0400018716.mm.1                    | -2,23 | 0,033464 | 0,522822 | Cassette Exon 0,16       |
| TC0400002244.mm.1 | 1,59 | Decr1 JUC0400009795.mm.1                    | -2,43 | 0,019195 | 0,472847 |                          |
| TC0400002244.mm.1 | 1,59 | Decr1 PSR0400018719.mm.1                    | -2,68 | 0,002468 | 0,349135 | Cassette Exon 0,24       |
| TC0400002244.mm.1 | 1,59 | Decr1 PSR0400018713.mm.1                    | -3,03 | 0,000465 | 0,298999 | Cassette Exon 0,2        |
| TC0400002244.mm.1 | 1,59 | Decr1 JUC0400009791.mm.1                    | -3,36 | 0,012843 | 0,437742 |                          |
| TC1200001344.mm.1 | 2,06 | 1110002L01Rik PSR1200009639.mm.1            | -2,06 | 0,009844 | 0,417839 | Alternative 5' Donc 0,24 |
| TC1200001344.mm.1 | 2,06 | 1110002L01Rik PSR1200009635.mm.1            | -2,09 | 0,02249  | 0,487114 | Cassette Exon 0,13       |
| TC1400002798.mm.1 | 1,77 | Mettl17 PSR1400004645.mm.1                  | -2,06 | 0,014819 | 0,451071 | Intron Retention 0,24    |
| TC1400002798.mm.1 | 1,77 | Mettl17 JUC1400002695.mm.1                  | -2,34 | 0,03994  | 0,540973 |                          |
| TC1400002798.mm.1 | 1,77 | Mettl17 PSR1400004654.mm.1                  | -2,51 | 0,042988 | 0,548408 | Alternative 3' Acce 0,24 |
| TC1900000943.mm.1 | 2,42 | Peli3 PSR1900008342.mm.1                    | -2,06 | 0,014234 | 0,447947 | Cassette Exon 0,24       |
| TC1900000943.mm.1 | 2,42 | Peli3 PSR1900008350.mm.1                    | -2,14 | 0,038471 | 0,536438 | Cassette Exon 0,2        |
| TC1900000943.mm.1 | 2,42 | Peli3 PSR1900008343.mm.1                    | -2,59 | 0,007864 | 0,403545 | Alternative 3' Acce 0,2  |
| TC1900000943.mm.1 | 2,42 | Peli3 JUC1900004584.mm.1                    | -5,31 | 0,009422 | 0,415976 |                          |
| TC1500000099.mm.1 | 1,45 | Zfr; Mir1898 JUC1500000564.mm.1             | -2,06 | 0,041983 | 0,546028 |                          |
| TC1500000099.mm.1 | 1,45 | Zfr; Mir1898 PSR1500000916.mm.1             | -2,07 | 0,049962 | 0,56403  | Cassette Exon 0,13       |
| TC1500000099.mm.1 | 1,45 | Zfr; Mir1898 PSR1500000942.mm.1             | -2,1  | 0,03491  | 0,52699  | Alternative 5' Donc 0,1  |
| TC1500000099.mm.1 | 1,45 | Zfr; Mir1898 PSR1500000915.mm.1             | -2,16 | 0,006725 | 0,393343 | Cassette Exon 0,1        |
| TC1500000099.mm.1 | 1,45 | Zfr; Mir1898 PSR1500000906.mm.1             | -2,17 | 0,038023 | 0,535471 | Cassette Exon 0,03       |
| TC1500000099.mm.1 | 1,45 | Zfr; Mir1898 JUC1500000552.mm.1             | -2,24 | 0,006721 | 0,393343 |                          |
| TC1500000099.mm.1 | 1,45 | Zfr; Mir1898 PSR1500000912.mm.1             | -2,72 | 0,045064 | 0,553102 | Alternative 3' Acce 0,21 |
| TC0300001359.mm.1 | 1,61 | Cxxc4 JUC0300005732.mm.1                    | -2,06 | 0,035941 | 0,529399 |                          |
| TC0300001359.mm.1 | 1,61 | Cxxc4 PSR0300010912.mm.1                    | -2,82 | 0,018808 | 0,470836 | Cassette Exon 0,19       |
| TC1700002597.mm.1 | 1,64 | Slc8a1 JUC1700012823.mm.1                   | -2,06 | 0,028033 | 0,505851 |                          |
| TC1700002597.mm.1 | 1,64 | Slc8a1 JUC1700012826.mm.1                   | -2,07 | 0,029    | 0,508842 |                          |
| TC1700002597.mm.1 | 1,64 | Slc8a1 PSR1700023789.mm.1                   | -2,25 | 0,048579 | 0,56104  | Alternative 3' Acce 0,19 |
| TC0900003163.mm.1 | 1,59 | Fbxl2 PSR0900026757.mm.1                    | -2,06 | 0,0308   | 0,514144 | Alternative 5' Donc 0,17 |
| TC0900003163.mm.1 | 1,59 | Fbxl2 JUC0900015041.mm.1                    | -2,3  | 0,000317 | 0,288663 |                          |
| TC0900003163.mm.1 | 1,59 | Fbxl2 JUC0900015047.mm.1                    | -3,04 | 0,003816 | 0,35811  |                          |
| TC1100000365.mm.1 | 1,33 | Gm12121 PSR1100003046.mm.1                  | -2,06 | 0,032437 | 0,519517 | Intron Retention 0,17    |
| TC1100000365.mm.1 | 1,33 | Gm12121 PSR1100003034.mm.1                  | -2,65 | 0,016125 | 0,457772 |                          |

|                   |                             |                    |       |          |                              |      |
|-------------------|-----------------------------|--------------------|-------|----------|------------------------------|------|
| TC1900000197.mm.1 | 1,38 Syt7                   | JUC1900001287.mm.1 | -2,06 | 0,043098 | 0,548554                     |      |
| TC1900000197.mm.1 | 1,38 Syt7                   | JUC1900001285.mm.1 | -2,08 | 0,028885 | 0,50858                      |      |
| TC1900000197.mm.1 | 1,38 Syt7                   | PSR1900002486.mm.1 | -2,15 | 0,031476 | 0,516924 Alternative 3' Acce | 0,17 |
| TC1900000197.mm.1 | 1,38 Syt7                   | JUC1900001283.mm.1 | -2,2  | 0,008707 | 0,409126                     |      |
| TC1900000197.mm.1 | 1,38 Syt7                   | PSR1900002501.mm.1 | -2,28 | 0,001035 | 0,316361                     |      |
| TC1900000197.mm.1 | 1,38 Syt7                   | JUC1900001281.mm.1 | -4,38 | 0,002655 | 0,349612                     |      |
| TC1000000039.mm.1 | 1,38 Oprm1                  | JUC1000000134.mm.1 | -2,06 | 0,031546 | 0,517128                     |      |
| TC1000000039.mm.1 | 1,38 Oprm1                  | PSR1000000297.mm.1 | -2,15 | 0,045556 | 0,554404 Alternative 5' Donc | 0,1  |
| TC1000000039.mm.1 | 1,38 Oprm1                  | PSR1000000253.mm.1 | -2,19 | 0,003206 | 0,354243 Cassette Exon       | 0,14 |
| TC1000000039.mm.1 | 1,38 Oprm1                  | PSR1000000293.mm.1 | -2,34 | 0,017074 | 0,462124 Alternative 3' Acce | 0,16 |
| TC1000000039.mm.1 | 1,38 Oprm1                  | JUC1000000176.mm.1 | -2,81 | 0,00369  | 0,357266                     |      |
| TC1000000039.mm.1 | 1,38 Oprm1                  | JUC1000000139.mm.1 | -2,84 | 0,013384 | 0,442371                     |      |
| TC0100001905.mm.1 | -1,13 Sox17                 | PSR0100015743.mm.1 | -2,06 | 0,017202 | 0,462491 Alternative 5' Donc | 0,15 |
| TC0400003292.mm.1 | 1,6 Skint10                 | PSR0400026202.mm.1 | -2,06 | 0,029065 | 0,509008 Cassette Exon       | 0,15 |
| TC0400003292.mm.1 | 1,6 Skint10                 | PSR0400026199.mm.1 | -2,21 | 0,007169 | 0,397855 Cassette Exon       | 0,11 |
| TC0400003292.mm.1 | 1,6 Skint10                 | JUC0400013624.mm.1 | -3,67 | 0,042899 | 0,548193                     |      |
| TC0600001449.mm.1 | 1,33 lffo1                  | PSR0600011826.mm.1 | -2,06 | 0,013407 | 0,442624 Alternative 3' Acce | 0,15 |
| TC0600001449.mm.1 | 1,33 lffo1                  | JUC0600006238.mm.1 | -2,25 | 0,032014 | 0,518371                     |      |
| TC0800001728.mm.1 | 3,12 Grtp1                  | PSR0800013986.mm.1 | -2,06 | 0,008733 | 0,409583 Cassette Exon       | 0,09 |
| TC0800001728.mm.1 | 3,12 Grtp1                  | PSR0800013989.mm.1 | -2,66 | 0,002455 | 0,349135 Cassette Exon       | 0,15 |
| TC1500001857.mm.1 | 1,03 Gm17753                | PSR1500014487.mm.1 | -2,06 | 0,027922 | 0,505612 Cassette Exon       | 0,14 |
| TC0X00002185.mm.1 | 1,83 Firre; 6720401G13Rik   | PSR0X00013887.mm.1 | -2,06 | 0,001131 | 0,317328 Intron Retention    | 0,13 |
| TC0X00002185.mm.1 | 1,83 Firre; 6720401G13Rik   | PSR0X00013956.mm.1 | -2,11 | 0,025995 | 0,499207 Cassette Exon       | 0,12 |
| TC0X00002185.mm.1 | 1,83 Firre; 6720401G13Rik   | JUC0X00007090.mm.1 | -2,23 | 0,010412 | 0,42148                      |      |
| TC0X00002185.mm.1 | 1,83 Firre; 6720401G13Rik   | JUC0X00007145.mm.1 | -2,53 | 0,017757 | 0,465425                     |      |
| TC0X00002185.mm.1 | 1,83 Firre; 6720401G13Rik   | JUC0X00007155.mm.1 | -3,36 | 0,034797 | 0,526823                     |      |
| TC1000002714.mm.1 | 1,14 Plxnc1                 | PSR1000020857.mm.1 | -2,06 | 0,012817 | 0,437465 Cassette Exon       | 0,12 |
| TC0200000562.mm.1 | 1,01 Nup214; Mir7674; mmu-n | PSR0200004919.mm.1 | -2,06 | 0,008247 | 0,405976 Alternative 5' Donc | 0,1  |
| TC0400002230.mm.1 | 1,12 Gm2560                 | PSR0400018623.mm.1 | -2,06 | 0,028657 | 0,507969 Cassette Exon       | 0,1  |
| TC0500000689.mm.1 | 1,27 Dcun1d4                | PSR0500006077.mm.1 | -2,06 | 0,048909 | 0,5618 Cassette Exon         | 0,1  |
| TC0800002425.mm.1 | 1,85 Abhd8                  | PSR0800018511.mm.1 | -2,06 | 0,044852 | 0,5526 Cassette Exon         | 0,1  |
| TC1300000883.mm.1 | -1,21 Slc6a3                | PSR1300005668.mm.1 | -2,06 | 0,033498 | 0,522941 Cassette Exon       | 0,1  |
| TC1400002283.mm.1 | 1,2 Ppp2r2a                 | PSR1400017632.mm.1 | -2,06 | 0,022454 | 0,487003 Alternative 5' Donc | 0,1  |
| TC1800000401.mm.1 | 1,93 Ndfip1                 | PSR1800002992.mm.1 | -2,06 | 0,039269 | 0,538976 Cassette Exon       | 0,1  |
| TC0500003717.mm.1 | 1,2 Rsph10b                 | PSR0500016087.mm.1 | -2,06 | 0,006157 | 0,387873 Cassette Exon       | 0,09 |
| TC0500003717.mm.1 | 1,2 Rsph10b                 | JUC0500008745.mm.1 | -2,06 | 0,019609 | 0,474765                     |      |
| TC1400000993.mm.1 | 1,01 Gm26908; LOC102636905  | PSR1400007983.mm.1 | -2,06 | 0,026531 | 0,501411 Cassette Exon       | 0,09 |
| TC1300000266.mm.1 | -1,32 Slc17a3               | PSR1300001521.mm.1 | -2,06 | 0,001536 | 0,330388 Cassette Exon       | 0,08 |
| TC0300000218.mm.1 | 1,11 Kcnmb2                 | JUC0300000606.mm.1 | -2,06 | 0,030221 | 0,512452                     |      |
| TC0300000538.mm.1 | 1,22 Rsrc1                  | JUC0300001928.mm.1 | -2,06 | 0,009384 | 0,415457                     |      |
| TC1100003849.mm.1 | -1,03 2810433D01Rik         | JUC1100018759.mm.1 | -2,06 | 0,019741 | 0,474932                     |      |
| TC1200000422.mm.1 | 1,39 Nubpl                  | JUC1200001676.mm.1 | -2,06 | 0,025169 | 0,496555                     |      |
| TC1300002431.mm.1 | -1,28 Papd4                 | JUC1300008566.mm.1 | -2,06 | 0,0401   | 0,541437                     |      |
| TC1300001128.mm.1 | 1,26 Zfp366                 | JUC1300003732.mm.1 | -2,06 | 0,015298 | 0,453376                     |      |
| TC0200005511.mm.1 | 1,3 Rbm12; Cpne1; RP23-220E | PSR0200042445.mm.1 | -2,06 | 0,034489 | 0,525929                     |      |
| TC0200005511.mm.1 | 1,3 Rbm12; Cpne1; RP23-220E | JUC0200021948.mm.1 | -3,98 | 0,00438  | 0,366096                     |      |
| TC1700001563.mm.1 | 1,15 Zfp942                 | JUC1700007457.mm.1 | -2,06 | 0,019967 | 0,476202                     |      |
| TC0200001879.mm.1 | -1,19 Slc12a1               | JUC0200007322.mm.1 | -2,06 | 0,029621 | 0,510558                     |      |

|                   |                   |                     |        |          |                              |      |
|-------------------|-------------------|---------------------|--------|----------|------------------------------|------|
| TC0200001829.mm.1 | 1,21 Ctdspl2      | JUC0200007095.mm.1  | -2,06  | 0,004323 | 0,364614                     |      |
| TC0200001829.mm.1 | 1,21 Ctdspl2      | JUC0200007099.mm.1  | -2,86  | 0,032067 | 0,518469                     |      |
| TC0200002157.mm.1 | 1,88 Slc24a3      | JUC0200008591.mm.1  | -2,06  | 0,019163 | 0,472719                     |      |
| TC0800001141.mm.1 | -1,05             | JUC0800004813.mm.1  | -2,06  | 0,018392 | 0,468484                     |      |
| TC0700004565.mm.1 | 1,56 Ctsd; lftm10 | JUC07000020261.mm.1 | -2,06  | 0,007249 | 0,39826                      |      |
| TC0700004569.mm.1 | -1,49 H19; Mir675 | JUC07000020285.mm.1 | -2,06  | 0,038799 | 0,537586                     |      |
| TC0700000024.mm.1 | 1,29 Leng8        | JUC0700000165.mm.1  | -2,06  | 0,018306 | 0,468049                     |      |
| TC0600002553.mm.1 | 1,08 Sema4f       | JUC06000010282.mm.1 | -2,06  | 0,009361 | 0,415092                     |      |
| TC0600002553.mm.1 | 1,08 Sema4f       | JUC06000010274.mm.1 | -2,48  | 0,005248 | 0,377696                     |      |
| TC0600002553.mm.1 | 1,08 Sema4f       | JUC06000010269.mm.1 | -2,77  | 0,019323 | 0,473305                     |      |
| TC0500003378.mm.1 | 1,17 Limk1        | JUC05000016588.mm.1 | -2,06  | 0,047353 | 0,558291                     |      |
| TC0500003378.mm.1 | 1,17 Limk1        | JUC05000016595.mm.1 | -2,13  | 0,002886 | 0,352207                     |      |
| TC0500003378.mm.1 | 1,17 Limk1        | JUC05000016591.mm.1 | -2,35  | 0,011919 | 0,431655                     |      |
| TC0700002978.mm.1 | 1,31 Ap2a1        | JUC07000014250.mm.1 | -2,06  | 0,038927 | 0,537874                     |      |
| TC0500003604.mm.1 | 1,14 Gm6309       | JUC05000018014.mm.1 | -2,06  | 0,011728 | 0,429969                     |      |
| TC0600000227.mm.1 | -1,23 Fam71f2     | JUC0600000717.mm.1  | -2,06  | 0,047749 | 0,559097                     |      |
| TC1100000776.mm.1 | 1 Aldh3a1         | JUC1100003236.mm.1  | -2,06  | 0,040237 | 0,541714                     |      |
| TC0300001949.mm.1 | 1,01 LOC102639521 | JUC0300007800.mm.1  | -2,06  | 0,04643  | 0,556547                     |      |
| TC1100003256.mm.1 | -1,26             | JUC11000015706.mm.1 | -2,06  | 0,009313 | 0,414883                     |      |
| TC1100001550.mm.1 | 1,08 Lasp1        | JUC1100007447.mm.1  | -2,06  | 0,018999 | 0,471564                     |      |
| TC0300002311.mm.1 | 1,43 Slc25a44     | JUC0300009204.mm.1  | -2,06  | 0,042445 | 0,547627                     |      |
| TC1100002015.mm.1 | -1,1 Baiap2       | JUC11000010109.mm.1 | -2,06  | 0,033582 | 0,523229                     |      |
| TC0300002350.mm.1 | 1,04 Zbtb7b       | PSR0300018105.mm.1  | -2,06  | 0,013104 | 0,439759                     |      |
| TC0300002350.mm.1 | 1,04 Zbtb7b       | JUC0300009466.mm.1  | -2,12  | 0,048946 | 0,5618                       |      |
| TC0X00001555.mm.1 | 2,2 Rragb         | JUC0X00004998.mm.1  | -2,06  | 0,019461 | 0,474165                     |      |
| TC0X00001555.mm.1 | 2,2 Rragb         | JUC0X00004988.mm.1  | -2,81  | 0,01125  | 0,426718                     |      |
| TC0400001770.mm.1 | 1,25 Padi2        | JUC0400007685.mm.1  | -2,06  | 0,000579 | 0,304044                     |      |
| TC1000000560.mm.1 | -1,13 Tbeta       | JUC1000002101.mm.1  | -2,06  | 0,029785 | 0,511132                     |      |
| TC0400001935.mm.1 | 1,58 Masp2        | JUC0400008343.mm.1  | -2,06  | 0,015158 | 0,452699                     |      |
| TC1000000870.mm.1 | 1,11 Dot1l        | JUC1000003602.mm.1  | -2,06  | 0,006014 | 0,386586                     |      |
| TC1100001158.mm.1 | 4,21 Unc119       | JUC1100005661.mm.1  | -2,07  | 0,000952 | 0,313363                     |      |
| TC1100001158.mm.1 | 4,21 Unc119       | JUC1100005663.mm.1  | -2,92  | 0,002055 | 0,341838                     |      |
| TC1100001158.mm.1 | 4,21 Unc119       | PSR1100010790.mm.1  | -3     | 0,002624 | 0,349612 Cassette Exon       | 0,17 |
| TC1100001158.mm.1 | 4,21 Unc119       | PSR1100010804.mm.1  | -3,22  | 0,03399  | 0,52432 Alternative 5' Donc  | 0,35 |
| TC1100001158.mm.1 | 4,21 Unc119       | PSR1100010800.mm.1  | -4,26  | 0,003156 | 0,353892 Alternative 3' Acce | 0,52 |
| TC1100001158.mm.1 | 4,21 Unc119       | PSR1100010791.mm.1  | -4,26  | 0,013982 | 0,446291 Alternative 3' Acce | 0,48 |
| TC1100001158.mm.1 | 4,21 Unc119       | PSR1100010797.mm.1  | -4,42  | 0,003727 | 0,357586 Intron Retention    | 0,67 |
| TC1100001158.mm.1 | 4,21 Unc119       | PSR1100010789.mm.1  | -5,54  | 0,019592 | 0,474685 Cassette Exon       | 0,29 |
| TC1100001158.mm.1 | 4,21 Unc119       | PSR1100010796.mm.1  | -10,92 | 0,001792 | 0,336311 Intron Retention    | 0,67 |
| TC0200005504.mm.1 | 5,66 Serinc4      | PSR0200038081.mm.1  | -2,07  | 0,041503 | 0,544746                     |      |
| TC0200005504.mm.1 | 5,66 Serinc4      | PSR0200038091.mm.1  | -2,65  | 0,00132  | 0,324348 Alternative 5' Donc | 0,17 |
| TC0200005504.mm.1 | 5,66 Serinc4      | JUC0200019626.mm.1  | -2,82  | 0,046695 | 0,556856                     |      |
| TC0200005504.mm.1 | 5,66 Serinc4      | PSR0200038086.mm.1  | -3,17  | 0,001237 | 0,322251 Cassette Exon       | 0,34 |
| TC0200005504.mm.1 | 5,66 Serinc4      | PSR0200038102.mm.1  | -3,57  | 0,009854 | 0,417891 Alternative 5' Donc | 0,41 |
| TC0200005504.mm.1 | 5,66 Serinc4      | JUC0200019624.mm.1  | -5,36  | 0,025882 | 0,498873                     |      |
| TC1100000296.mm.1 | 2,03 Mtif2        | PSR1100002512.mm.1  | -2,07  | 0,024088 | 0,493089 Intron Retention    | 0,21 |
| TC1100000296.mm.1 | 2,03 Mtif2        | JUC1100001329.mm.1  | -2,07  | 0,040126 | 0,541532                     |      |
| TC1100000296.mm.1 | 2,03 Mtif2        | PSR1100002500.mm.1  | -3,46  | 0,022001 | 0,485226 Alternative 5' Donc | 0,36 |

|                   |                              |                    |       |          |          |                          |
|-------------------|------------------------------|--------------------|-------|----------|----------|--------------------------|
| TC1100001198.mm.1 | 2,63 Rhot1                   | JUC1100005891.mm.1 | -2,07 | 0,02387  | 0,492241 |                          |
| TC1100001198.mm.1 | 2,63 Rhot1                   | JUC1100005900.mm.1 | -2,51 | 0,015423 | 0,454071 |                          |
| TC1100001198.mm.1 | 2,63 Rhot1                   | JUC1100005909.mm.1 | -2,52 | 0,046985 | 0,557657 |                          |
| TC1100001198.mm.1 | 2,63 Rhot1                   | PSR1100011216.mm.1 | -2,82 | 0,013855 | 0,445409 | Alternative 3' Acce 0,29 |
| TC1100001198.mm.1 | 2,63 Rhot1                   | PSR1100011183.mm.1 | -3,23 | 0,014183 | 0,447608 | Alternative 3' Acce 0,25 |
| TC1100001198.mm.1 | 2,63 Rhot1                   | PSR1100011212.mm.1 | -3,3  | 0,039384 | 0,539438 | Alternative 3' Acce 0,35 |
| TC1100001198.mm.1 | 2,63 Rhot1                   | PSR1100011193.mm.1 | -3,8  | 0,001678 | 0,335182 | Alternative 5' Donc 0,17 |
| TC1100001198.mm.1 | 2,63 Rhot1                   | JUC1100005908.mm.1 | -5,65 | 0,00478  | 0,371122 |                          |
| TC0400002480.mm.1 | 2,45 Ccl27a                  | PSR0400020088.mm.1 | -2,07 | 0,04258  | 0,548047 | Intron Retention 0,29    |
| TC0400002480.mm.1 | 2,45 Ccl27a                  | PSR0400020087.mm.1 | -2,63 | 0,005005 | 0,373851 | Intron Retention 0,29    |
| TC0400002480.mm.1 | 2,45 Ccl27a                  | PSR0400020071.mm.1 | -2,98 | 0,013358 | 0,442089 | Cassette Exon 0,23       |
| TC0400002480.mm.1 | 2,45 Ccl27a                  | JUC0400010446.mm.1 | -3,01 | 0,013632 | 0,444143 |                          |
| TC0400002480.mm.1 | 2,45 Ccl27a                  | PSR0400020095.mm.1 | -3,59 | 0,009306 | 0,414883 |                          |
| TC0400002480.mm.1 | 2,45 Ccl27a                  | PSR0400020104.mm.1 | -4,38 | 0,019449 | 0,474131 | Alternative 5' Donc 0,16 |
| TC1900000916.mm.1 | 1,43 Adrbk1                  | PSR1900008000.mm.1 | -2,07 | 0,021955 | 0,485095 | Intron Retention 0,27    |
| TC1900000916.mm.1 | 1,43 Adrbk1                  | JUC1900004403.mm.1 | -2,17 | 0,013574 | 0,443703 |                          |
| TC1000002794.mm.1 | 1,46 Tmtc2                   | PSR1000021270.mm.1 | -2,07 | 0,04361  | 0,550141 | Cassette Exon 0,1        |
| TC1000002794.mm.1 | 1,46 Tmtc2                   | PSR1000021268.mm.1 | -2,26 | 0,042103 | 0,546511 | Alternative 3' Acce 0,14 |
| TC1000002794.mm.1 | 1,46 Tmtc2                   | PSR1000021287.mm.1 | -2,69 | 0,023627 | 0,491012 | Alternative 5' Donc 0,25 |
| TC1000002794.mm.1 | 1,46 Tmtc2                   | PSR1000021265.mm.1 | -3,07 | 0,027601 | 0,504485 | Cassette Exon 0,13       |
| TC1100001100.mm.1 | 1,54 Timm22                  | PSR1100010006.mm.1 | -2,07 | 0,019103 | 0,472235 | Alternative 5' Donc 0,22 |
| TC1100001100.mm.1 | 1,54 Timm22                  | JUC1100005265.mm.1 | -2,52 | 0,015292 | 0,453368 |                          |
| TC1100001100.mm.1 | 1,54 Timm22                  | PSR1100010013.mm.1 | -2,61 | 0,018869 | 0,4711   | Alternative 5' Donc 0,24 |
| TC0600000016.mm.1 | 1,37 Ppp1r9a                 | PSR0600000229.mm.1 | -2,07 | 0,005311 | 0,378059 | Alternative 5' Donc 0,2  |
| TC0600000016.mm.1 | 1,37 Ppp1r9a                 | PSR0600000231.mm.1 | -2,07 | 0,022863 | 0,488467 | Alternative 5' Donc 0,2  |
| TC0600000016.mm.1 | 1,37 Ppp1r9a                 | PSR0600000230.mm.1 | -2,28 | 0,042633 | 0,548097 | Alternative 5' Donc 0,2  |
| TC0600000016.mm.1 | 1,37 Ppp1r9a                 | PSR0600000232.mm.1 | -2,54 | 0,022026 | 0,485249 | Cassette Exon 0,19       |
| TC0600000016.mm.1 | 1,37 Ppp1r9a                 | JUC0600000155.mm.1 | -2,83 | 0,004428 | 0,366832 |                          |
| TC1600001971.mm.1 | 1,04 Cyyr1; Gm2541           | PSR1600015270.mm.1 | -2,07 | 0,044082 | 0,550916 | Alternative 5' Donc 0,2  |
| TC1600001971.mm.1 | 1,04 Cyyr1; Gm2541           | JUC1600007878.mm.1 | -2,92 | 0,029881 | 0,51129  |                          |
| TC0500001267.mm.1 | 1,19 Gcn1l1; Mir7029; Gm1312 | JUC0500005992.mm.1 | -2,07 | 0,017505 | 0,463964 |                          |
| TC0500001267.mm.1 | 1,19 Gcn1l1; Mir7029; Gm1312 | PSR0500011007.mm.1 | -2,22 | 0,010699 | 0,423322 | Cassette Exon 0,11       |
| TC0500001267.mm.1 | 1,19 Gcn1l1; Mir7029; Gm1312 | PSR0500011035.mm.1 | -2,47 | 0,014179 | 0,447583 | Cassette Exon 0,19       |
| TC0900002791.mm.1 | -1,03 Tbx18                  | PSR0900023135.mm.1 | -2,07 | 0,004073 | 0,361986 | Alternative 5' Donc 0,19 |
| TC1600001079.mm.1 | 1,79 Wrbb                    | PSR1600008537.mm.1 | -2,07 | 0,002869 | 0,352207 | Alternative 5' Donc 0,18 |
| TC1600001079.mm.1 | 1,79 Wrbb                    | PSR1600008532.mm.1 | -2,69 | 0,004436 | 0,366981 | Alternative 5' Donc 0,14 |
| TC1600001079.mm.1 | 1,79 Wrbb                    | JUC1600004435.mm.1 | -4,26 | 0,039374 | 0,539409 |                          |
| TC1600001236.mm.1 | 1,12 Pdxdc1                  | PSR1600009915.mm.1 | -2,07 | 0,008927 | 0,410972 | Intron Retention 0,14    |
| TC1600001236.mm.1 | 1,12 Pdxdc1                  | PSR1600009930.mm.1 | -2,17 | 0,022129 | 0,485558 | Alternative 3' Acce 0,18 |
| TC1100001018.mm.1 | 1,06 Shpk                    | PSR1100009243.mm.1 | -2,07 | 0,008572 | 0,40821  | Alternative 3' Acce 0,17 |
| TC1100001018.mm.1 | 1,06 Shpk                    | JUC1100004864.mm.1 | -2,31 | 0,005258 | 0,377945 |                          |
| TC1800001228.mm.1 | 1,19 1700086O06Rik           | JUC1800005093.mm.1 | -2,07 | 0,026149 | 0,50001  |                          |
| TC1800001228.mm.1 | 1,19 1700086O06Rik           | PSR1800009128.mm.1 | -2,27 | 0,015862 | 0,456449 | Cassette Exon 0,16       |
| TC0100000665.mm.1 | 1,4 Slc4a3                   | PSR0100005747.mm.1 | -2,07 | 0,03121  | 0,51581  | Alternative 5' Donc 0,15 |
| TC0700002116.mm.1 | 1,33 Oraov1                  | PSR0700019068.mm.1 | -2,07 | 0,03884  | 0,537749 | Alternative 3' Acce 0,15 |
| TC0800003036.mm.1 | 1,28 A330074K22Rik           | PSR0800023389.mm.1 | -2,07 | 0,04935  | 0,562806 | Alternative 5' Donc 0,14 |
| TC1300002481.mm.1 | -1,25 Hexb                   | PSR1300016648.mm.1 | -2,07 | 0,021905 | 0,484824 | Alternative 3' Acce 0,14 |
| TC1600001754.mm.1 | 2,32 Gm19797                 | PSR1600014247.mm.1 | -2,07 | 0,003563 | 0,356223 | Cassette Exon 0,14       |

|                    |                            |                    |       |          |                        |      |
|--------------------|----------------------------|--------------------|-------|----------|------------------------|------|
| TC1600001754.mm.1  | 2,32 Gm19797               | PSR1600014243.mm.1 | -2,18 | 0,046428 | 0,556547 Cassette Exon | 0,12 |
| TC1600001754.mm.1  | 2,32 Gm19797               | PSR1600014242.mm.1 | -2,23 | 0,000324 | 0,288663 Cassette Exon | 0,11 |
| TC0100003074.mm.1  | 2,31 Tmcc2                 | PSR0100024679.mm.1 | -2,07 | 0,002708 | 0,349612 Cassette Exon | 0,12 |
| TC0100003074.mm.1  | 2,31 Tmcc2                 | PSR0100024683.mm.1 | -2,1  | 0,006644 | 0,392838 Cassette Exon | 0,09 |
| TC0100003074.mm.1  | 2,31 Tmcc2                 | PSR0100024684.mm.1 | -2,23 | 0,024147 | 0,493245 Cassette Exon | 0,13 |
| TC0100003074.mm.1  | 2,31 Tmcc2                 | JUC0100014011.mm.1 | -2,55 | 0,009387 | 0,415457               |      |
| TC1200001299.mm.1  | 1,69 Vipr2                 | PSR1200009350.mm.1 | -2,07 | 0,004523 | 0,368648 Cassette Exon | 0,13 |
| TC1200001299.mm.1  | 1,69 Vipr2                 | JUC1200005155.mm.1 | -2,34 | 0,014038 | 0,44654                |      |
| TC1200001299.mm.1  | 1,69 Vipr2                 | JUC1200005163.mm.1 | -3,21 | 0,015625 | 0,45509                |      |
| TC0700000561.mm.1  | 1,65 Tyrobp                | PSR0700004867.mm.1 | -2,07 | 0,003702 | 0,357266 Cassette Exon | 0,12 |
| TC1600000324.mm.1  | 1,03 Fetub                 | PSR1600003215.mm.1 | -2,07 | 0,033999 | 0,524371 Cassette Exon | 0,12 |
| TC1600001471.mm.1  | 1,43 Xylt1                 | PSR1600012140.mm.1 | -2,07 | 0,014256 | 0,447947 Cassette Exon | 0,12 |
| TC0600003333.mm.1  | -1,32 Smco3                | PSR0600026156.mm.1 | -2,07 | 0,046318 | 0,556186 Cassette Exon | 0,1  |
| TC1100001643.mm.1  | 1,73 Tubg2                 | JUC1100007936.mm.1 | -2,07 | 0,00743  | 0,399925               |      |
| TC1100001643.mm.1  | 1,73 Tubg2                 | JUC1100007937.mm.1 | -2,08 | 0,040241 | 0,541721               |      |
| TC1100001643.mm.1  | 1,73 Tubg2                 | PSR1100015314.mm.1 | -2,12 | 0,007564 | 0,401384 Cassette Exon | 0,1  |
| TC0X00003098.mm.1  | -1,2 Acsl4                 | PSR0X00019491.mm.1 | -2,07 | 0,000581 | 0,304044 Cassette Exon | 0,01 |
| TC1400000768.mm.1  | -1,01                      | JUC1400003188.mm.1 | -2,07 | 0,014013 | 0,446443               |      |
| TC1200001982.mm.1  | 1,39 Zfyve26               | JUC1200007540.mm.1 | -2,07 | 0,026488 | 0,501252               |      |
| TC1300001811.mm.1  | -1,16                      | JUC1300005780.mm.1 | -2,07 | 0,046474 | 0,556596               |      |
| TC0200003643.mm.1  | -1,25 Fign                 | JUC0200015782.mm.1 | -2,07 | 0,032318 | 0,519155               |      |
| TC0200004930.mm.1  | 1,7 Nol4l; 8430427H17Rik   | JUC0200021561.mm.1 | -2,07 | 0,036723 | 0,531766               |      |
| TC0200004930.mm.1  | 1,7 Nol4l; 8430427H17Rik   | JUC0200021572.mm.1 | -2,43 | 0,013388 | 0,442391               |      |
| TC0200004930.mm.1  | 1,7 Nol4l; 8430427H17Rik   | JUC0200021577.mm.1 | -2,88 | 0,02764  | 0,504658               |      |
| TC0200004930.mm.1  | 1,7 Nol4l; 8430427H17Rik   | JUC0200021570.mm.1 | -3,71 | 0,004227 | 0,363295               |      |
| TC0200005028.mm.1  | 1,06 Tti1                  | JUC0200022200.mm.1 | -2,07 | 0,033448 | 0,522793               |      |
| TC1800000107.mm.1  | 1,17 Cabyr                 | JUC1800000481.mm.1 | -2,07 | 0,01657  | 0,459612               |      |
| TC1700000921.mm.1  | 1,06 Med20; Usp49; Gm20517 | JUC1700004725.mm.1 | -2,07 | 0,040874 | 0,543423               |      |
| TC1700001903.mm.1  | -1,28 Gm20496              | JUC1700009516.mm.1 | -2,07 | 0,042475 | 0,547627               |      |
| TC1800001215.mm.1  | 1,26                       | JUC1800004968.mm.1 | -2,07 | 0,000378 | 0,293011               |      |
| TC0100001129.mm.1  | -1,21 R3hdm1               | JUC0100005314.mm.1 | -2,07 | 0,044395 | 0,551441               |      |
| TC1500001643.mm.1  | -1,03 Oc90                 | JUC1500006949.mm.1 | -2,07 | 0,009306 | 0,414883               |      |
| TC1600002182.mm.1  | 1,47 Donson                | JUC1600008259.mm.1 | -2,07 | 0,008884 | 0,410642               |      |
| TC0800000012.mm.1  | -1,19 C330021F23Rik        | JUC0800000102.mm.1 | -2,07 | 0,027704 | 0,504872               |      |
| TC0500002478.mm.1  | -1,29                      | JUC0500012019.mm.1 | -2,07 | 0,034369 | 0,525628               |      |
| TC0900001477.mm.1  | 2,56 Lrrc2                 | JUC0900006929.mm.1 | -2,07 | 0,024724 | 0,494838               |      |
| TC0900001477.mm.1  | 2,56 Lrrc2                 | JUC0900006928.mm.1 | -4,54 | 0,048911 | 0,5618                 |      |
| TC0500001638.mm.1  | -1,06 Azgp1                | JUC0500008155.mm.1 | -2,07 | 0,032094 | 0,51852                |      |
| TC0600001917.mm.1  | -1,14 Tspan12              | JUC0600007851.mm.1 | -2,07 | 0,043446 | 0,549785               |      |
| TC0600000553.mm.1  | -1,05 Sspo                 | JUC0600002071.mm.1 | -2,07 | 0,023966 | 0,49267                |      |
| TC0600000553.mm.1  | -1,05 Sspo                 | JUC0600002100.mm.1 | -2,75 | 0,042837 | 0,548097               |      |
| TC1000003050.mm.1  | 1,1 Xpot; Gm24330          | JUC1000012464.mm.1 | -2,07 | 0,040433 | 0,542058               |      |
| TC0400000531.mm.1  | 1,05 Invs                  | JUC0400001973.mm.1 | -2,07 | 0,036949 | 0,532361               |      |
| TC1100002908.mm.1  | 1,02 Slc47a2               | JUC1100013735.mm.1 | -2,07 | 0,009298 | 0,414883               |      |
| TC0X00000691.mm.1  | -1,04 Abcd1                | JUC0X00002264.mm.1 | -2,07 | 0,008149 | 0,405473               |      |
| TC04000004173.mm.1 | -1,22 Plekhn1              | JUC0400018273.mm.1 | -2,07 | 0,023782 | 0,491795               |      |
| TC0400001856.mm.1  | -1,03 Dhrrs3               | JUC0400007997.mm.1 | -2,07 | 0,013104 | 0,439759               |      |
| TC0900002405.mm.1  | 3,52 Bbs4                  | JUC0900011416.mm.1 | -2,08 | 0,01107  | 0,425887               |      |

|                   |                             |                    |       |          |                              |      |
|-------------------|-----------------------------|--------------------|-------|----------|------------------------------|------|
| TC0900002405.mm.1 | 3,52 Bbs4                   | JUC0900011425.mm.1 | -2,51 | 0,009647 | 0,417354                     |      |
| TC0900002405.mm.1 | 3,52 Bbs4                   | PSR0900020237.mm.1 | -3,28 | 0,001677 | 0,335182 Casette Exon        | 0,26 |
| TC0900002405.mm.1 | 3,52 Bbs4                   | PSR0900020233.mm.1 | -3,97 | 0,001476 | 0,329052 Intron Retention    | 0,68 |
| TC0900002405.mm.1 | 3,52 Bbs4                   | PSR0900020239.mm.1 | -4,26 | 0,005882 | 0,383835 Casette Exon        | 0,26 |
| TC0900002405.mm.1 | 3,52 Bbs4                   | PSR0900020231.mm.1 | -4,82 | 0,003753 | 0,357586 Alternative 3' Acce | 0,48 |
| TC0900002405.mm.1 | 3,52 Bbs4                   | PSR0900020235.mm.1 | -5,87 | 0,000008 | 0,179072 Intron Retention    | 0,67 |
| TC0700002855.mm.1 | 25,5 Rgs9bp                 | PSR0700025525.mm.1 | -2,08 | 0,012822 | 0,437482 Casette Exon        | 0,16 |
| TC0700002855.mm.1 | 25,5 Rgs9bp                 | PSR0700025527.mm.1 | -25   | 0,003318 | 0,354243 Alternative 5' Donc | 0,32 |
| TC1100001155.mm.1 | 1,54 Spag5                  | PSR1100010724.mm.1 | -2,08 | 0,028699 | 0,508019 Alternative 5' Donc | 0,09 |
| TC1100001155.mm.1 | 1,54 Spag5                  | PSR1100010708.mm.1 | -2,25 | 0,007256 | 0,39826 Intron Retention     | 0,3  |
| TC1100001155.mm.1 | 1,54 Spag5                  | JUC1100005612.mm.1 | -2,26 | 0,000266 | 0,28803                      |      |
| TC0300000307.mm.1 | 3,39 Hspa4l                 | JUC0300001148.mm.1 | -2,08 | 0,014724 | 0,450372                     |      |
| TC0300000307.mm.1 | 3,39 Hspa4l                 | PSR0300002244.mm.1 | -2,43 | 0,003256 | 0,354243                     |      |
| TC0300000307.mm.1 | 3,39 Hspa4l                 | PSR0300002202.mm.1 | -3,19 | 0,014995 | 0,452052 Alternative 3' Acce | 0,2  |
| TC0300000307.mm.1 | 3,39 Hspa4l                 | PSR0300002209.mm.1 | -3,64 | 0,001431 | 0,327454 Casette Exon        | 0,27 |
| TC0300000307.mm.1 | 3,39 Hspa4l                 | JUC0300001142.mm.1 | -3,93 | 0,006622 | 0,392392                     |      |
| TC0300000307.mm.1 | 3,39 Hspa4l                 | PSR0300002199.mm.1 | -4    | 0,004879 | 0,372195 Casette Exon        | 0,28 |
| TC0700000874.mm.1 | 3,94 Kcnc1                  | PSR0700007861.mm.1 | -2,08 | 0,038248 | 0,535883 Casette Exon        | 0,09 |
| TC0700000874.mm.1 | 3,94 Kcnc1                  | PSR0700007862.mm.1 | -2,33 | 0,022565 | 0,487303 Casette Exon        | 0,09 |
| TC0700000874.mm.1 | 3,94 Kcnc1                  | PSR0700007857.mm.1 | -2,35 | 0,018668 | 0,470205 Alternative 5' Donc | 0,15 |
| TC0700000874.mm.1 | 3,94 Kcnc1                  | PSR0700007850.mm.1 | -2,62 | 0,042395 | 0,547599 Casette Exon        | 0,2  |
| TC0700000874.mm.1 | 3,94 Kcnc1                  | PSR0700007851.mm.1 | -2,66 | 0,025006 | 0,496061 Casette Exon        | 0,15 |
| TC0700000874.mm.1 | 3,94 Kcnc1                  | PSR0700007847.mm.1 | -2,94 | 0,033192 | 0,522148 Casette Exon        | 0,2  |
| TC0700000874.mm.1 | 3,94 Kcnc1                  | PSR0700007859.mm.1 | -4,3  | 0,017199 | 0,462491 Casette Exon        | 0,26 |
| TC0700000874.mm.1 | 3,94 Kcnc1                  | PSR0700007848.mm.1 | -4,37 | 0,012369 | 0,434906 Alternative 3' Acce | 0,22 |
| TC0200005429.mm.1 | 2,8 Chrna4                  | PSR0200046235.mm.1 | -2,08 | 0,044495 | 0,551741 Casette Exon        | 0,21 |
| TC0200005429.mm.1 | 2,8 Chrna4                  | PSR0200046223.mm.1 | -2,3  | 0,016584 | 0,459685 Casette Exon        | 0,24 |
| TC0200005429.mm.1 | 2,8 Chrna4                  | PSR0200046221.mm.1 | -3,09 | 0,010781 | 0,423955 Casette Exon        | 0,22 |
| TC0200005429.mm.1 | 2,8 Chrna4                  | JUC0200023823.mm.1 | -3,17 | 0,024548 | 0,494088                     |      |
| TC0200005429.mm.1 | 2,8 Chrna4                  | JUC0200023829.mm.1 | -3,54 | 0,008215 | 0,405934                     |      |
| TC0300002220.mm.1 | 2,46 Gucy1a3; Mir7010; mmu- | PSR0300016694.mm.1 | -2,08 | 0,014464 | 0,449094 Alternative 3' Acce | 0,17 |
| TC0300002220.mm.1 | 2,46 Gucy1a3; Mir7010; mmu- | PSR0300016701.mm.1 | -2,1  | 0,010539 | 0,422281 Casette Exon        | 0,11 |
| TC0300002220.mm.1 | 2,46 Gucy1a3; Mir7010; mmu- | PSR0300016700.mm.1 | -2,27 | 0,007447 | 0,40013 Casette Exon         | 0,12 |
| TC0300002220.mm.1 | 2,46 Gucy1a3; Mir7010; mmu- | JUC0300008776.mm.1 | -2,79 | 0,028216 | 0,506368                     |      |
| TC0300002220.mm.1 | 2,46 Gucy1a3; Mir7010; mmu- | PSR0300016699.mm.1 | -2,94 | 0,005519 | 0,380501 Casette Exon        | 0,21 |
| TC1600000143.mm.1 | 1,7 Shisa9                  | PSR1600001006.mm.1 | -2,08 | 0,000814 | 0,311886 Casette Exon        | 0,21 |
| TC1600000143.mm.1 | 1,7 Shisa9                  | JUC1600000511.mm.1 | -8,72 | 0,017541 | 0,464105                     |      |
| TC0700001766.mm.1 | 1,49 Rbbp6                  | JUC0700007869.mm.1 | -2,08 | 0,042259 | 0,547092                     |      |
| TC0700001766.mm.1 | 1,49 Rbbp6                  | PSR0700015047.mm.1 | -2,14 | 0,033538 | 0,523131 Casette Exon        | 0,18 |
| TC0700001766.mm.1 | 1,49 Rbbp6                  | JUC0700007873.mm.1 | -2,75 | 0,027441 | 0,504022                     |      |
| TC0500003248.mm.1 | -1,04 Gm16001               | PSR0500029268.mm.1 | -2,08 | 0,025931 | 0,499121 Alternative 3' Acce | 0,17 |
| TC0X00001335.mm.1 | 1,46 Tceal1                 | PSR0X00008389.mm.1 | -2,08 | 0,032049 | 0,518459 Alternative 3' Acce | 0,17 |
| TC0X00001541.mm.1 | 1,34 Kdm5c                  | PSR0X00009779.mm.1 | -2,08 | 0,025248 | 0,496939 Alternative 3' Acce | 0,17 |
| TC1000000905.mm.1 | 2,2 BC025920                | PSR1000007224.mm.1 | -2,08 | 0,027307 | 0,503732 Intron Retention    | 0,15 |
| TC1000000905.mm.1 | 2,2 BC025920                | PSR1000007228.mm.1 | -2,64 | 0,023831 | 0,491992 Casette Exon        | 0,15 |
| TC1000000905.mm.1 | 2,2 BC025920                | JUC1000003894.mm.1 | -2,75 | 0,017574 | 0,464258                     |      |
| TC1000000905.mm.1 | 2,2 BC025920                | PSR1000007229.mm.1 | -2,89 | 0,004898 | 0,372268 Casette Exon        | 0,17 |
| TC1200000744.mm.1 | 1,04 4933426M11Rik          | PSR1200005277.mm.1 | -2,08 | 0,010502 | 0,42211 Alternative 5' Donc  | 0,17 |

|                   |                     |                     |       |          |                              |      |
|-------------------|---------------------|---------------------|-------|----------|------------------------------|------|
| TC0700000764.mm.1 | 1,1 Zfp658          | PSR0700006194.mm.1  | -2,08 | 0,016138 | 0,45788 Alternative 3' Acce  | 0,16 |
| TCOX00003000.mm.1 | 1,64 Armcx2         | PSROX00018737.mm.1  | -2,08 | 0,034156 | 0,524919 Alternative 3' Acce | 0,16 |
| TCOX00003000.mm.1 | 1,64 Armcx2         | PSROX00018738.mm.1  | -2,09 | 0,042133 | 0,546588 Alternative 3' Acce | 0,16 |
| TCOX00003000.mm.1 | 1,64 Armcx2         | PSROX00018736.mm.1  | -2,35 | 0,021315 | 0,481714                     |      |
| TC1100003492.mm.1 | 1,6 Gm11508         | PSR11000031998.mm.1 | -2,08 | 0,018796 | 0,470789 Alternative 5' Donc | 0,16 |
| TC1000000531.mm.1 | 1,66 P4ha1          | PSR10000003556.mm.1 | -2,08 | 0,024778 | 0,495014 Alternative 5' Donc | 0,13 |
| TC0100003502.mm.1 | 2,14 Rgs4           | PSR0100028600.mm.1  | -2,08 | 0,037613 | 0,53412 Cassette Exon        | 0,12 |
| TC0300002721.mm.1 | 1,36 4933431E20Rik  | PSR0300021245.mm.1  | -2,08 | 0,006515 | 0,391382 Alternative 5' Donc | 0,12 |
| TC0300002721.mm.1 | 1,36 4933431E20Rik  | PSR0300021244.mm.1  | -2,32 | 0,038817 | 0,537595 Alternative 5' Donc | 0,12 |
| TC0300002721.mm.1 | 1,36 4933431E20Rik  | JUC0300011049.mm.1  | -3,23 | 0,040104 | 0,541445                     |      |
| TC0300002721.mm.1 | 1,36 4933431E20Rik  | JUC0300011045.mm.1  | -3,3  | 0,003958 | 0,359922                     |      |
| TC0300002721.mm.1 | 1,36 4933431E20Rik  | JUC0300011047.mm.1  | -3,35 | 0,010173 | 0,419711                     |      |
| TC1400000033.mm.1 | 1,24 Gm3269; Gm3594 | PSR1400000444.mm.1  | -2,08 | 0,012497 | 0,435429 Alternative 5' Donc | 0,12 |
| TC0300001491.mm.1 | 2,03 Ssx2ip         | PSR0300012063.mm.1  | -2,08 | 0,024666 | 0,494682 Cassette Exon       | 0,11 |
| TC0300001491.mm.1 | 2,03 Ssx2ip         | JUC0300006380.mm.1  | -2,58 | 0,046424 | 0,556537                     |      |
| TC0600000967.mm.1 | 1,58 Alms1-ps1      | PSR0600007491.mm.1  | -2,08 | 0,017876 | 0,466276 Cassette Exon       | 0,11 |
| TC0600000967.mm.1 | 1,58 Alms1-ps1      | JUC0600003824.mm.1  | -3,54 | 0,01374  | 0,444758                     |      |
| TC1500002309.mm.1 | 1,3 Cbx5            | PSR1500019104.mm.1  | -2,08 | 0,006222 | 0,387912 Alternative 3' Acce | 0,11 |
| TC1500002309.mm.1 | 1,3 Cbx5            | PSR1500019124.mm.1  | -2,08 | 0,034127 | 0,524882 Cassette Exon       | 0,09 |
| TC0500003554.mm.1 | -1,15 E130309D02Rik | PSR0500032566.mm.1  | -2,08 | 0,023556 | 0,490947 Alternative 3' Acce | 0,1  |
| TCOX00002631.mm.1 | 1,19 Pola1          | PSROX00016417.mm.1  | -2,08 | 0,018211 | 0,467586 Cassette Exon       | 0,1  |
| TCOX00002631.mm.1 | 1,19 Pola1          | JUCOX00008366.mm.1  | -2,29 | 0,045606 | 0,55464                      |      |
| TCOX00002631.mm.1 | 1,19 Pola1          | JUCOX00008332.mm.1  | -2,33 | 0,002402 | 0,348564                     |      |
| TCOX00002631.mm.1 | 1,19 Pola1          | JUCOX00008347.mm.1  | -2,96 | 0,008465 | 0,406624                     |      |
| TC1600000703.mm.1 | 1,55 Gm6931         | PSR1600006180.mm.1  | -2,08 | 0,016879 | 0,460797 Alternative 3' Acce | 0,1  |
| TC1400001731.mm.1 | -1,02 Opn4          | PSR1400013489.mm.1  | -2,08 | 0,00169  | 0,335395 Cassette Exon       | 0,09 |
| TC0500000465.mm.1 | 1,35 Cc2d2a         | PSR0500004458.mm.1  | -2,08 | 0,019765 | 0,474996 Cassette Exon       | 0,05 |
| TC0500000465.mm.1 | 1,35 Cc2d2a         | JUC0500002515.mm.1  | -2,24 | 0,026275 | 0,50053                      |      |
| TC1200000583.mm.1 | -1,15 Abhd12b       | JUC1200002172.mm.1  | -2,08 | 0,049709 | 0,563531                     |      |
| TC1300001882.mm.1 | -1,02 Ranbp9        | JUC1300006011.mm.1  | -2,08 | 0,048083 | 0,559824                     |      |
| TC0100002656.mm.1 | -1,21 Dock10        | JUC0100012243.mm.1  | -2,08 | 0,006525 | 0,391502                     |      |
| TC0200000087.mm.1 | -1,16 Sfmtb2        | JUC0200000294.mm.1  | -2,08 | 0,018283 | 0,468049                     |      |
| TC0500003188.mm.1 | 1,2 Erp29           | JUC0500015458.mm.1  | -2,08 | 0,043895 | 0,550616                     |      |
| TC0300003142.mm.1 | 1,09 Fam73a         | JUC0300012942.mm.1  | -2,08 | 0,005169 | 0,376797                     |      |
| TC1000002658.mm.1 | 1,53 Slc17a8        | JUC1000011131.mm.1  | -2,08 | 0,004463 | 0,36753                      |      |
| TC0400003380.mm.1 | 1,3 Dph2            | JUC0400014143.mm.1  | -2,08 | 0,038877 | 0,537855                     |      |
| TC0400002944.mm.1 | 1,19 Frem1          | JUC0400012444.mm.1  | -2,08 | 0,003393 | 0,359818                     |      |
| TC0400004041.mm.1 | 1,04 Rbp7           | JUC0400017516.mm.1  | -2,08 | 0,013604 | 0,443731                     |      |
| TC0900002656.mm.1 | 5,78 Unc13c         | JUC0900012352.mm.1  | -2,08 | 0,045989 | 0,555536                     |      |
| TC1400002759.mm.1 | 2,29 Nalcn          | PSR1400020623.mm.1  | -2,09 | 0,043173 | 0,548807 Cassette Exon       | 0,13 |
| TC1400002759.mm.1 | 2,29 Nalcn          | PSR1400020661.mm.1  | -2,25 | 0,028188 | 0,506368 Cassette Exon       | 0,19 |
| TC1400002759.mm.1 | 2,29 Nalcn          | PSR1400020630.mm.1  | -2,28 | 0,017102 | 0,46232 Cassette Exon        | 0,17 |
| TC1400002759.mm.1 | 2,29 Nalcn          | PSR1400020633.mm.1  | -2,43 | 0,047552 | 0,558707 Cassette Exon       | 0,18 |
| TC1400002759.mm.1 | 2,29 Nalcn          | PSR1400020637.mm.1  | -2,46 | 0,016984 | 0,461441 Cassette Exon       | 0,21 |
| TC1400002759.mm.1 | 2,29 Nalcn          | PSR1400020612.mm.1  | -2,48 | 0,025728 | 0,498173 Cassette Exon       | 0,33 |
| TC1400002759.mm.1 | 2,29 Nalcn          | JUC1400011415.mm.1  | -2,67 | 0,046522 | 0,556739                     |      |
| TC1400002759.mm.1 | 2,29 Nalcn          | JUC1400011395.mm.1  | -2,71 | 0,048169 | 0,56006                      |      |
| TC1400002759.mm.1 | 2,29 Nalcn          | JUC1400011419.mm.1  | -2,75 | 0,023638 | 0,491102                     |      |



|                   |      |        |                    |       |          |          |                     |      |
|-------------------|------|--------|--------------------|-------|----------|----------|---------------------|------|
| TC1400002759.mm.1 | 2,29 | Nalcn  | PSR1400020622.mm.1 | -2,78 | 0,007178 | 0,397855 | Cassette Exon       | 0,2  |
| TC1400002759.mm.1 | 2,29 | Nalcn  | PSR1400020649.mm.1 | -2,92 | 0,004053 | 0,361816 | Cassette Exon       | 0,2  |
| TC1400002759.mm.1 | 2,29 | Nalcn  | PSR1400020624.mm.1 | -3,23 | 0,021842 | 0,484607 | Cassette Exon       | 0,21 |
| TC1400002759.mm.1 | 2,29 | Nalcn  | PSR1400020613.mm.1 | -3,4  | 0,02246  | 0,487019 | Cassette Exon       | 0,25 |
| TC1400002759.mm.1 | 2,29 | Nalcn  | JUC1400011377.mm.1 | -3,61 | 0,046708 | 0,556856 |                     |      |
| TC1400002759.mm.1 | 2,29 | Nalcn  | PSR1400020642.mm.1 | -3,71 | 0,013795 | 0,444974 | Alternative 5' Donc | 0,42 |
| TC1400002759.mm.1 | 2,29 | Nalcn  | PSR1400020640.mm.1 | -3,85 | 0,023562 | 0,490947 | Alternative 3' Acce | 0,45 |
| TC1400002759.mm.1 | 2,29 | Nalcn  | PSR1400020655.mm.1 | -4,12 | 0,037211 | 0,533267 | Alternative 3' Acce | 0,42 |
| TC1400002759.mm.1 | 2,29 | Nalcn  | JUC1400011417.mm.1 | -4,48 | 0,012624 | 0,436032 |                     |      |
| TC1400002759.mm.1 | 2,29 | Nalcn  | JUC1400011373.mm.1 | -5,25 | 0,032949 | 0,52122  |                     |      |
| TC1000002438.mm.1 | 2,25 | Pfkl   | PSR1000017684.mm.1 | -2,09 | 0,00187  | 0,338121 | Alternative 3' Acce | 0,06 |
| TC1000002438.mm.1 | 2,25 | Pfkl   | PSR1000017717.mm.1 | -2,35 | 0,000158 | 0,272178 | Alternative 5' Donc | 0,18 |
| TC1000002438.mm.1 | 2,25 | Pfkl   | PSR1000017698.mm.1 | -2,63 | 0,035469 | 0,528724 | Alternative 5' Donc | 0,15 |
| TC1000002438.mm.1 | 2,25 | Pfkl   | JUC1000009716.mm.1 | -3,06 | 0,009165 | 0,413447 |                     |      |
| TC1000002438.mm.1 | 2,25 | Pfkl   | PSR1000017704.mm.1 | -3,27 | 0,001403 | 0,325997 | Alternative 3' Acce | 0,34 |
| TC0600002200.mm.1 | 1,15 | Ezh2   | JUC0600009084.mm.1 | -2,09 | 0,005446 | 0,379869 |                     |      |
| TC0600002200.mm.1 | 1,15 | Ezh2   | PSR0600017337.mm.1 | -2,84 | 0,000181 | 0,283791 | Alternative 5' Donc | 0,32 |
| TCOX00003116.mm.1 | 1,88 | Dcx    | PSR0X00019599.mm.1 | -2,09 | 0,001589 | 0,331726 | Alternative 5' Donc | 0,07 |
| TCOX00003116.mm.1 | 1,88 | Dcx    | JUCOX00009921.mm.1 | -2,41 | 0,024229 | 0,493294 |                     |      |
| TCOX00003116.mm.1 | 1,88 | Dcx    | PSR0X00019592.mm.1 | -2,53 | 0,041699 | 0,545356 | Cassette Exon       | 0,01 |
| TCOX00003116.mm.1 | 1,88 | Dcx    | PSR0X00019594.mm.1 | -2,99 | 0,001432 | 0,327493 | Cassette Exon       | 0,32 |
| TCOX00003116.mm.1 | 1,88 | Dcx    | JUCOX00009924.mm.1 | -3,91 | 0,005031 | 0,374382 |                     |      |
| TC1300001020.mm.1 | 2,16 | Ssbp2  | PSR1300006501.mm.1 | -2,09 | 0,000795 | 0,310965 | Cassette Exon       | 0,08 |
| TC1300001020.mm.1 | 2,16 | Ssbp2  | PSR1300006495.mm.1 | -2,2  | 0,03257  | 0,520133 | Alternative 3' Acce | 0,17 |
| TC1300001020.mm.1 | 2,16 | Ssbp2  | PSR1300006505.mm.1 | -2,46 | 0,00206  | 0,341885 | Alternative 5' Donc | 0,11 |
| TC1300001020.mm.1 | 2,16 | Ssbp2  | PSR1300006494.mm.1 | -2,5  | 0,019162 | 0,472719 | Cassette Exon       | 0,15 |
| TC1300001020.mm.1 | 2,16 | Ssbp2  | PSR1300006504.mm.1 | -2,78 | 0,007494 | 0,400809 | Alternative 5' Donc | 0,18 |
| TC1300001020.mm.1 | 2,16 | Ssbp2  | JUC1300003420.mm.1 | -2,92 | 0,014121 | 0,447137 |                     |      |
| TC1300001020.mm.1 | 2,16 | Ssbp2  | PSR1300006514.mm.1 | -3,29 | 0,013576 | 0,443703 | Alternative 3' Acce | 0,32 |
| TC0400003349.mm.1 | 2,44 | Mmachc | JUC0400013959.mm.1 | -2,09 | 0,027978 | 0,505748 |                     |      |
| TC0400003349.mm.1 | 2,44 | Mmachc | PSR0400026777.mm.1 | -3,65 | 0,033095 | 0,521734 | Alternative 5' Donc | 0,29 |
| TC0500001134.mm.1 | 1,2  | Golga3 | JUC0500005290.mm.1 | -2,09 | 0,007642 | 0,402169 |                     |      |
| TC0500001134.mm.1 | 1,2  | Golga3 | PSR0500009679.mm.1 | -2,16 | 0,040469 | 0,542132 | Intron Retention    | 0,28 |
| TC0700001631.mm.1 | 1,05 | Ampd3  | PSR0700013513.mm.1 | -2,09 | 0,032116 | 0,518585 | Cassette Exon       | 0,07 |
| TC0700001631.mm.1 | 1,05 | Ampd3  | PSR0700013521.mm.1 | -2,72 | 0,012716 | 0,43654  | Alternative 5' Donc | 0,28 |
| TC0700003397.mm.1 | 1,13 | Gm9801 | PSR0700029007.mm.1 | -2,09 | 0,005011 | 0,373851 | Intron Retention    | 0,27 |
| TC0700003397.mm.1 | 1,13 | Gm9801 | PSR0700029029.mm.1 | -2,82 | 0,020808 | 0,479505 | Cassette Exon       | 0,19 |
| TC1000002121.mm.1 | 2,56 | Grik2  | PSR1000014993.mm.1 | -2,09 | 0,003602 | 0,356223 | Cassette Exon       | 0,19 |
| TC1000002121.mm.1 | 2,56 | Grik2  | JUC1000008128.mm.1 | -2,35 | 0,001503 | 0,329896 |                     |      |
| TC1000002121.mm.1 | 2,56 | Grik2  | PSR1000014989.mm.1 | -2,42 | 0,001453 | 0,328414 | Cassette Exon       | 0,14 |
| TC1000002121.mm.1 | 2,56 | Grik2  | PSR1000014988.mm.1 | -2,47 | 0,026894 | 0,502518 | Cassette Exon       | 0,12 |
| TC1000002121.mm.1 | 2,56 | Grik2  | PSR1000014999.mm.1 | -2,69 | 0,018325 | 0,468127 | Cassette Exon       | 0,15 |
| TC1000002121.mm.1 | 2,56 | Grik2  | JUC1000008133.mm.1 | -2,9  | 0,031637 | 0,517405 |                     |      |
| TC1000002121.mm.1 | 2,56 | Grik2  | PSR1000015009.mm.1 | -3,8  | 0,004366 | 0,365487 | Cassette Exon       | 0,26 |
| TC1000002121.mm.1 | 2,56 | Grik2  | PSR1000014985.mm.1 | -7,15 | 0,002791 | 0,351449 | Cassette Exon       | 0,26 |
| TC0500000015.mm.1 | 1,39 | Pex1   | PSR0500000121.mm.1 | -2,09 | 0,03587  | 0,529376 | Cassette Exon       | 0,09 |
| TC0500000015.mm.1 | 1,39 | Pex1   | PSR0500000133.mm.1 | -2,15 | 0,030494 | 0,513341 | Cassette Exon       | 0,16 |
| TC0500000015.mm.1 | 1,39 | Pex1   | PSR0500000132.mm.1 | -3,3  | 0,002869 | 0,352207 | Cassette Exon       | 0,22 |

|                   |                              |                    |       |          |                              |      |
|-------------------|------------------------------|--------------------|-------|----------|------------------------------|------|
| TC1600002136.mm.1 | 1,44 Brwd1                   | PSR1600016398.mm.1 | -2,09 | 0,033074 | 0,521669 Alternative 3' Acce | 0,17 |
| TC1600002136.mm.1 | 1,44 Brwd1                   | PSR1600016442.mm.1 | -2,46 | 0,015182 | 0,452699 Alternative 3' Acce | 0,22 |
| TC1400002870.mm.1 | -1,08 Setdb2; Phf11c; Phf11d | PSR1400016705.mm.1 | -2,09 | 0,003396 | 0,359922 Cassette Exon       | 0,21 |
| TC1400002870.mm.1 | -1,08 Setdb2; Phf11c; Phf11d | JUC1400009145.mm.1 | -2,09 | 0,024556 | 0,494116                     |      |
| TC1400002870.mm.1 | -1,08 Setdb2; Phf11c; Phf11d | PSR1400016714.mm.1 | -2,1  | 0,013439 | 0,442693 Alternative 5' Donc | 0,09 |
| TC1400002870.mm.1 | -1,08 Setdb2; Phf11c; Phf11d | JUC1400009123.mm.1 | -2,88 | 0,041243 | 0,544166                     |      |
| TC0200003540.mm.1 | 1,02 Stam2; Gm13548          | PSR0200030259.mm.1 | -2,09 | 0,032069 | 0,518469 Alternative 5' Donc | 0,18 |
| TC0200000525.mm.1 | 1,17 Tbc1d13                 | PSR0200004095.mm.1 | -2,09 | 0,024414 | 0,493825 Alternative 3' Acce | 0,17 |
| TC0200000525.mm.1 | 1,17 Tbc1d13                 | JUC0200002062.mm.1 | -4,43 | 0,015941 | 0,456831                     |      |
| TC0500002821.mm.1 | 1,74 Gm16227                 | PSR0500024774.mm.1 | -2,09 | 0,025914 | 0,499027 Alternative 3' Acce | 0,17 |
| TC1100000170.mm.1 | 1,04 C1d                     | PSR1100001543.mm.1 | -2,09 | 0,028061 | 0,505951 Alternative 5' Donc | 0,17 |
| TC1700001390.mm.1 | -1,32 Ezz                    | PSR1700012536.mm.1 | -2,09 | 0,005657 | 0,381879 Alternative 3' Acce | 0,17 |
| TC0200004485.mm.1 | 1,71 Ppip5k1                 | PSR0200037973.mm.1 | -2,09 | 0,014357 | 0,448293 Intron Retention    | 0,16 |
| TC0200004485.mm.1 | 1,71 Ppip5k1                 | JUC0200019556.mm.1 | -2,55 | 0,022079 | 0,485405                     |      |
| TC0200004651.mm.1 | 1,57 Rnf24                   | PSR0200039986.mm.1 | -2,09 | 0,00614  | 0,387604 Cassette Exon       | 0,15 |
| TC0200004651.mm.1 | 1,57 Rnf24                   | JUC0200020716.mm.1 | -2,76 | 0,003795 | 0,357968                     |      |
| TC0400001302.mm.1 | 1,27 Gm12841                 | PSR0400009770.mm.1 | -2,09 | 0,017497 | 0,463964 Cassette Exon       | 0,15 |
| TC0400001302.mm.1 | 1,27 Gm12841                 | JUC0400005118.mm.1 | -2,16 | 0,006761 | 0,393343                     |      |
| TC0X00001271.mm.1 | -1,97 SrpX2                  | PSR0X00007841.mm.1 | -2,09 | 0,017368 | 0,463612 Alternative 3' Acce | 0,15 |
| TC0X00001271.mm.1 | -1,97 SrpX2                  | JUC0X00003850.mm.1 | -2,59 | 0,023721 | 0,491521                     |      |
| TC1200002517.mm.1 | 1,91 Gm5977; Asap2           | PSR1200001375.mm.1 | -2,09 | 0,01634  | 0,458616 Cassette Exon       | 0,1  |
| TC1200002517.mm.1 | 1,91 Gm5977; Asap2           | PSR1200001379.mm.1 | -2,13 | 0,001571 | 0,331411 Alternative 3' Acce | 0,15 |
| TC1500001278.mm.1 | 1,29 4930445E18Rik           | PSR1500010032.mm.1 | -2,09 | 0,011169 | 0,426345 Alternative 3' Acce | 0,15 |
| TC0100003820.mm.1 | 1,09 1700034H15Rik           | JUC0100017710.mm.1 | -2,09 | 0,018146 | 0,467399                     |      |
| TC0100003820.mm.1 | 1,09 1700034H15Rik           | PSR0100031202.mm.1 | -2,39 | 0,014105 | 0,447123 Alternative 3' Acce | 0,14 |
| TC1000002594.mm.1 | 1,07 Ckap4                   | PSR1000019580.mm.1 | -2,09 | 0,047405 | 0,558302 Alternative 3' Acce | 0,14 |
| TC0200003815.mm.1 | 1,96 Zfp385b                 | JUC0200017016.mm.1 | -2,09 | 0,033947 | 0,524252                     |      |
| TC0200003815.mm.1 | 1,96 Zfp385b                 | PSR0200033025.mm.1 | -2,27 | 0,044633 | 0,552129 Cassette Exon       | 0,1  |
| TC0200003815.mm.1 | 1,96 Zfp385b                 | PSR0200033015.mm.1 | -2,52 | 0,011362 | 0,427452 Cassette Exon       | 0,13 |
| TC0200003815.mm.1 | 1,96 Zfp385b                 | JUC0200017024.mm.1 | -3,71 | 0,003025 | 0,353502                     |      |
| TC0200003815.mm.1 | 1,96 Zfp385b                 | JUC0200017015.mm.1 | -6,26 | 0,041531 | 0,544763                     |      |
| TC1700002308.mm.1 | -1,68 Stap2                  | PSR1700021529.mm.1 | -2,09 | 0,032063 | 0,518469 Cassette Exon       | 0,13 |
| TC0200001189.mm.1 | 1,83 Zfp804a                 | PSR0200009505.mm.1 | -2,09 | 0,039913 | 0,54093 Alternative 3' Acce  | 0,12 |
| TC0200001189.mm.1 | 1,83 Zfp804a                 | JUC0200004850.mm.1 | -2,46 | 0,034964 | 0,52724                      |      |
| TC0200001189.mm.1 | 1,83 Zfp804a                 | JUC0200004852.mm.1 | -6,02 | 0,005572 | 0,381015                     |      |
| TC0100000676.mm.1 | -1,05                        | PSR0100005810.mm.1 | -2,09 | 0,020481 | 0,478018 Cassette Exon       | 0,1  |
| TC0200002661.mm.1 | 1,12 Gm14271                 | PSR0200021659.mm.1 | -2,09 | 0,03638  | 0,530811 Cassette Exon       | 0,1  |
| TC0400000662.mm.1 | -1,03 Snx30; Gm12543         | PSR0400004711.mm.1 | -2,09 | 0,003154 | 0,353892 Cassette Exon       | 0,1  |
| TC0400000662.mm.1 | -1,03 Snx30; Gm12543         | PSR0400004717.mm.1 | -2,28 | 0,019372 | 0,473624                     |      |
| TC0400002424.mm.1 | 1,28 Gm12381                 | PSR0400019571.mm.1 | -2,09 | 0,033879 | 0,524139 Cassette Exon       | 0,1  |
| TC0X00003157.mm.1 | -1,35 Gm15104                | PSR0X00019775.mm.1 | -2,09 | 0,010577 | 0,422452 Cassette Exon       | 0,1  |
| TC1100000268.mm.1 | 1,47 Gm12070; Gm5523         | PSR1100002280.mm.1 | -2,09 | 0,006217 | 0,387912 Cassette Exon       | 0,1  |
| TC1500002208.mm.1 | 1,06 Fam186b                 | PSR1500018053.mm.1 | -2,09 | 0,00319  | 0,354243 Cassette Exon       | 0,1  |
| TC0800002455.mm.1 | 1,05                         | PSR0800018782.mm.1 | -2,09 | 0,00647  | 0,390467 Cassette Exon       | 0,09 |
| TC1400002179.mm.1 | 1,2 Gm20017; Gm15919         | JUC1400009234.mm.1 | -2,09 | 0,033447 | 0,522793                     |      |
| TC1400002179.mm.1 | 1,2 Gm20017; Gm15919         | JUC1400009232.mm.1 | -2,63 | 0,002693 | 0,349612                     |      |
| TC0200005346.mm.1 | 1,28 LOC628147; Gm14295; Gn  | JUC0200023443.mm.1 | -2,09 | 0,031717 | 0,517489                     |      |
| TC1100004304.mm.1 | 1,22 Mafg                    | JUC1100021155.mm.1 | -2,09 | 0,037648 | 0,534212                     |      |

|                   |                            |                    |       |          |                              |      |
|-------------------|----------------------------|--------------------|-------|----------|------------------------------|------|
| TC0300000956.mm.1 | 1,36 Pias3                 | JUC0300003970.mm.1 | -2,09 | 0,044494 | 0,551741                     |      |
| TC1300001191.mm.1 | 1,3 3830408C21Rik          | PSR1300007581.mm.1 | -2,09 | 0,013696 | 0,44468                      |      |
| TC1300001191.mm.1 | 1,3 3830408C21Rik          | JUC1300003960.mm.1 | -3,41 | 0,041419 | 0,544646                     |      |
| TC0100002837.mm.1 | 1,06 Thap4                 | JUC0100013091.mm.1 | -2,09 | 0,00408  | 0,362111                     |      |
| TC1900001705.mm.1 | 1,07 Dclre1a               | JUC1900008370.mm.1 | -2,09 | 0,022523 | 0,487133                     |      |
| TC0200001735.mm.1 | -1,08 Eif2ak4              | JUC0200006387.mm.1 | -2,09 | 0,016249 | 0,458312                     |      |
| TC0200002282.mm.1 | -1,11 6820408C15Rik        | JUC0200008973.mm.1 | -2,09 | 0,009093 | 0,412827                     |      |
| TC1700000522.mm.1 | -1,14 Dnah8                | JUC1700002587.mm.1 | -2,09 | 0,019534 | 0,474538                     |      |
| TC1700000526.mm.1 | -1,11 Umodl1               | JUC1700002629.mm.1 | -2,09 | 0,012623 | 0,436032                     |      |
| TC0200000827.mm.1 | -1,25 A430018G15Rik        | JUC0200003471.mm.1 | -2,09 | 0,018402 | 0,468484                     |      |
| TC0800001572.mm.1 | 2,21 Kcnk1                 | JUC0800007041.mm.1 | -2,09 | 0,004622 | 0,369794                     |      |
| TC0800001809.mm.1 | -1,17 Defa-ps15            | JUC0800007861.mm.1 | -2,09 | 0,011045 | 0,425792                     |      |
| TC0800003173.mm.1 | 1,38 Ttc13                 | JUC0800013326.mm.1 | -2,09 | 0,046079 | 0,555658                     |      |
| TC0800003173.mm.1 | 1,38 Ttc13                 | JUC0800013313.mm.1 | -2,7  | 0,032578 | 0,520209                     |      |
| TC0600001293.mm.1 | 1,26 Fam21                 | JUC0600005361.mm.1 | -2,09 | 0,032443 | 0,519525                     |      |
| TC0700002717.mm.1 | -1,02 Catsperg1            | JUC0700012812.mm.1 | -2,09 | 0,045201 | 0,553548                     |      |
| TC0700004633.mm.1 | -1,01 Gm15448; Pirb; Pira6 | JUC0700010290.mm.1 | -2,09 | 0,045253 | 0,553703                     |      |
| TC1100000923.mm.1 | 1,44 Zbtb4                 | JUC1100004128.mm.1 | -2,09 | 0,012292 | 0,434277                     |      |
| TC1100000566.mm.1 | 1,18 Col23a1               | JUC1100002292.mm.1 | -2,09 | 0,017032 | 0,461729                     |      |
| TC1000001988.mm.1 | -1,14 Zufsp                | JUC1000007713.mm.1 | -2,09 | 0,016433 | 0,459007                     |      |
| TC0400001239.mm.1 | 1,05 Mknk1                 | JUC0400004779.mm.1 | -2,09 | 0,006313 | 0,389263                     |      |
| TC0400001239.mm.1 | 1,05 Mknk1                 | JUC0400004774.mm.1 | -2,24 | 0,011057 | 0,425887                     |      |
| TC1100002065.mm.1 | 1,34 Fn3k                  | JUC1100010401.mm.1 | -2,09 | 0,000383 | 0,293869                     |      |
| TC0400003536.mm.1 | -1,1 Tekt2                 | JUC0400015022.mm.1 | -2,09 | 0,017718 | 0,465209                     |      |
| TC1000003219.mm.1 | 1,46 BC030307              | JUC1000004255.mm.1 | -2,09 | 0,002902 | 0,352207                     |      |
| TC1000001166.mm.1 | -1,01                      | JUC1000004744.mm.1 | -2,09 | 0,030586 | 0,513425                     |      |
| TC0X00002648.mm.1 | 1,26 Maged1                | JUC0X00008428.mm.1 | -2,09 | 0,010081 | 0,418998                     |      |
| TC0300001530.mm.1 | 2,31 Usp33                 | PSR0300012351.mm.1 | -2,1  | 0,008989 | 0,41198 Intron Retention     | 0,27 |
| TC0300001530.mm.1 | 2,31 Usp33                 | PSR0300012346.mm.1 | -2,22 | 0,010905 | 0,424472 Cassette Exon       | 0,14 |
| TC0300001530.mm.1 | 2,31 Usp33                 | PSR0300012342.mm.1 | -2,26 | 0,022736 | 0,487845 Cassette Exon       | 0,18 |
| TC0300001530.mm.1 | 2,31 Usp33                 | JUC0300006527.mm.1 | -2,52 | 0,003355 | 0,354243                     |      |
| TC0300001530.mm.1 | 2,31 Usp33                 | PSR0300012377.mm.1 | -2,59 | 0,011641 | 0,429841 Alternative 5' Donc | 0,24 |
| TC0300001530.mm.1 | 2,31 Usp33                 | PSR0300012340.mm.1 | -3,97 | 0,00984  | 0,417839 Alternative 5' Donc | 0,47 |
| TC0500002865.mm.1 | 7,93 Mapk10                | PSR0500025332.mm.1 | -2,1  | 0,002852 | 0,352207 Cassette Exon       | 0,1  |
| TC0500002865.mm.1 | 7,93 Mapk10                | JUC0500013777.mm.1 | -2,11 | 0,008591 | 0,408237                     |      |
| TC0500002865.mm.1 | 7,93 Mapk10                | PSR0500025345.mm.1 | -2,8  | 0,024868 | 0,49558 Alternative 3' Acce  | 0,28 |
| TC0500002865.mm.1 | 7,93 Mapk10                | JUC0500013783.mm.1 | -2,81 | 0,000962 | 0,313363                     |      |
| TC0500002865.mm.1 | 7,93 Mapk10                | PSR0500025359.mm.1 | -2,93 | 0,003523 | 0,355752 Alternative 5' Donc | 0,39 |
| TC0500002865.mm.1 | 7,93 Mapk10                | PSR0500025335.mm.1 | -2,96 | 0,011651 | 0,429885 Cassette Exon       | 0,15 |
| TC0500002865.mm.1 | 7,93 Mapk10                | PSR0500025320.mm.1 | -3,72 | 0,037796 | 0,534693 Alternative 3' Acce | 0,39 |
| TC0500002865.mm.1 | 7,93 Mapk10                | PSR0500025323.mm.1 | -3,98 | 0,005026 | 0,374176 Alternative 3' Acce | 0,39 |
| TC0500002865.mm.1 | 7,93 Mapk10                | PSR0500025318.mm.1 | -4,24 | 0,027943 | 0,505612 Alternative 3' Acce | 0,39 |
| TC0500002865.mm.1 | 7,93 Mapk10                | PSR0500025338.mm.1 | -4,38 | 0,027532 | 0,504339 Alternative 3' Acce | 0,47 |
| TC0500002865.mm.1 | 7,93 Mapk10                | PSR0500025322.mm.1 | -5,02 | 0,007208 | 0,398121 Alternative 3' Acce | 0,39 |
| TC0500002865.mm.1 | 7,93 Mapk10                | PSR0500025341.mm.1 | -5,05 | 0,001584 | 0,331726 Cassette Exon       | 0,39 |
| TC0500002865.mm.1 | 7,93 Mapk10                | PSR0500025321.mm.1 | -5,4  | 0,012109 | 0,43269 Alternative 3' Acce  | 0,39 |
| TC0500002865.mm.1 | 7,93 Mapk10                | PSR0500025357.mm.1 | -6,76 | 0,015979 | 0,456905 Cassette Exon       | 0,29 |
| TC0500002865.mm.1 | 7,93 Mapk10                | PSR0500025337.mm.1 | -7,78 | 0,009677 | 0,417605 Alternative 3' Acce | 0,47 |

|                   |      |                   |                    |        |          |          |                     |      |
|-------------------|------|-------------------|--------------------|--------|----------|----------|---------------------|------|
| TC0500002865.mm.1 | 7,93 | Mapk10            | JUC0500013791.mm.1 | -8,31  | 0,009715 | 0,417826 |                     |      |
| TC0500002865.mm.1 | 7,93 | Mapk10            | PSR0500025343.mm.1 | -10,31 | 0,00815  | 0,405473 | Cassette Exon       | 0,16 |
| TC0500002865.mm.1 | 7,93 | Mapk10            | PSR0500025355.mm.1 | -11,37 | 0,00499  | 0,373851 |                     |      |
| TC0500002865.mm.1 | 7,93 | Mapk10            | PSR0500025349.mm.1 | -12,24 | 0,009164 | 0,413447 | Cassette Exon       | 0,25 |
| TC0500002865.mm.1 | 7,93 | Mapk10            | PSR0500025354.mm.1 | -13,57 | 0,010739 | 0,423772 |                     |      |
| TC0500002865.mm.1 | 7,93 | Mapk10            | PSR0500025348.mm.1 | -14,06 | 0,003196 | 0,354243 | Cassette Exon       | 0,38 |
| TC0500002865.mm.1 | 7,93 | Mapk10            | PSR0500025330.mm.1 | -16,18 | 0,00278  | 0,351017 | Cassette Exon       | 0,27 |
| TC0500002865.mm.1 | 7,93 | Mapk10            | PSR0500025324.mm.1 | -16,82 | 0,009454 | 0,416478 | Alternative 3' Acce | 0,39 |
| TC0500002865.mm.1 | 7,93 | Mapk10            | PSR0500025363.mm.1 | -18,95 | 0,005576 | 0,381035 | Cassette Exon       | 0,41 |
| TC0500002865.mm.1 | 7,93 | Mapk10            | JUC0500013797.mm.1 | -25,15 | 0,007529 | 0,40125  |                     |      |
| TC0500002865.mm.1 | 7,93 | Mapk10            | PSR0500025319.mm.1 | -38,1  | 0,002869 | 0,352207 | Alternative 3' Acce | 0,39 |
| TC0X00001333.mm.1 | 1,68 | Tceal3; LOC331528 | PSR0X00008379.mm.1 | -2,1   | 0,00298  | 0,352501 | Cassette Exon       | 0,18 |
| TC0X00001333.mm.1 | 1,68 | Tceal3; LOC331528 | PSR0X00008371.mm.1 | -2,12  | 0,009422 | 0,415976 | Cassette Exon       | 0,03 |
| TC0X00001333.mm.1 | 1,68 | Tceal3; LOC331528 | JUC0X00004106.mm.1 | -2,15  | 0,025629 | 0,497926 |                     |      |
| TC0X00001333.mm.1 | 1,68 | Tceal3; LOC331528 | JUC0X00004117.mm.1 | -2,38  | 0,037521 | 0,533968 |                     |      |
| TC0X00001333.mm.1 | 1,68 | Tceal3; LOC331528 | JUC0X00004107.mm.1 | -2,39  | 0,001261 | 0,322251 |                     |      |
| TC0X00001333.mm.1 | 1,68 | Tceal3; LOC331528 | PSR0X00008380.mm.1 | -2,43  | 0,036023 | 0,529546 | Alternative 3' Acce | 0,17 |
| TC0X00001333.mm.1 | 1,68 | Tceal3; LOC331528 | PSR0X00008375.mm.1 | -2,61  | 0,026462 | 0,501252 | Cassette Exon       | 0,07 |
| TC0X00001333.mm.1 | 1,68 | Tceal3; LOC331528 | PSR0X00008368.mm.1 | -3,86  | 0,001753 | 0,335996 | Alternative 3' Acce | 0,3  |
| TC1300001911.mm.1 | 2,06 | Atxn1             | PSR1300011847.mm.1 | -2,1   | 0,035014 | 0,527423 | Alternative 5' Donc | 0,3  |
| TC1300001911.mm.1 | 2,06 | Atxn1             | PSR1300011848.mm.1 | -2,96  | 0,021451 | 0,482293 | Alternative 5' Donc | 0,3  |
| TC0600001907.mm.1 | 2,47 | Cttnbp2           | PSR0600014959.mm.1 | -2,1   | 0,047407 | 0,558302 | Alternative 3' Acce | 0,21 |
| TC0600001907.mm.1 | 2,47 | Cttnbp2           | PSR0600014970.mm.1 | -2,15  | 0,014512 | 0,449545 | Cassette Exon       | 0,14 |
| TC0600001907.mm.1 | 2,47 | Cttnbp2           | PSR0600014966.mm.1 | -2,31  | 0,012933 | 0,438537 | Alternative 3' Acce | 0,12 |
| TC0600001907.mm.1 | 2,47 | Cttnbp2           | PSR0600014969.mm.1 | -2,53  | 0,015818 | 0,45594  | Alternative 3' Acce | 0,06 |
| TC0600001907.mm.1 | 2,47 | Cttnbp2           | PSR0600014961.mm.1 | -2,72  | 0,000765 | 0,308403 | Alternative 3' Acce | 0,24 |
| TC0600001907.mm.1 | 2,47 | Cttnbp2           | PSR0600014932.mm.1 | -2,84  | 0,026195 | 0,50003  | Alternative 3' Acce | 0,29 |
| TC0600001907.mm.1 | 2,47 | Cttnbp2           | PSR0600014958.mm.1 | -2,96  | 0,034084 | 0,524705 | Cassette Exon       | 0,25 |
| TC0600001907.mm.1 | 2,47 | Cttnbp2           | JUC0600007819.mm.1 | -3,19  | 0,013352 | 0,442045 |                     |      |
| TC0600001907.mm.1 | 2,47 | Cttnbp2           | PSR0600014972.mm.1 | -3,27  | 0,00359  | 0,356223 | Alternative 5' Donc | 0,18 |
| TC0600001907.mm.1 | 2,47 | Cttnbp2           | JUC0600007831.mm.1 | -3,56  | 0,005558 | 0,380773 |                     |      |
| TC0600001907.mm.1 | 2,47 | Cttnbp2           | PSR0600014960.mm.1 | -3,7   | 0,003889 | 0,359225 | Alternative 3' Acce | 0,24 |
| TC0500002315.mm.1 | 2,07 | Fbxl5             | PSR0500021290.mm.1 | -2,1   | 0,039417 | 0,539608 | Alternative 3' Acce | 0,13 |
| TC0500002315.mm.1 | 2,07 | Fbxl5             | PSR0500021301.mm.1 | -2,63  | 0,011791 | 0,430163 | Alternative 3' Acce | 0,26 |
| TC1100003687.mm.1 | 1,61 | Med24; Gm22059    | PSR1100033963.mm.1 | -2,1   | 0,040451 | 0,542094 | Alternative 3' Acce | 0,25 |
| TC1100003687.mm.1 | 1,61 | Med24; Gm22059    | PSR1100033945.mm.1 | -2,15  | 0,027471 | 0,504083 | Alternative 5' Donc | 0,15 |
| TC1100003687.mm.1 | 1,61 | Med24; Gm22059    | PSR1100033922.mm.1 | -2,18  | 0,015104 | 0,452457 | Alternative 3' Acce | 0,12 |
| TC1100003687.mm.1 | 1,61 | Med24; Gm22059    | JUC1100017786.mm.1 | -2,53  | 0,028057 | 0,505951 |                     |      |
| TC1100003687.mm.1 | 1,61 | Med24; Gm22059    | JUC1100017790.mm.1 | -2,87  | 0,035546 | 0,528764 |                     |      |
| TC1100003687.mm.1 | 1,61 | Med24; Gm22059    | JUC1100017791.mm.1 | -4,54  | 0,030095 | 0,511942 |                     |      |
| TC0100003352.mm.1 | 1,95 | Rabgap1l          | JUC0100015740.mm.1 | -2,1   | 0,025375 | 0,497403 |                     |      |
| TC0100003352.mm.1 | 1,95 | Rabgap1l          | PSR0100027464.mm.1 | -2,12  | 0,002958 | 0,352501 | Alternative 3' Acce | 0,22 |
| TC0100003352.mm.1 | 1,95 | Rabgap1l          | PSR0100027463.mm.1 | -2,64  | 0,006869 | 0,394155 | Alternative 3' Acce | 0,22 |
| TC0100003352.mm.1 | 1,95 | Rabgap1l          | PSR0100027455.mm.1 | -3,11  | 0,004731 | 0,370888 | Alternative 3' Acce | 0,18 |
| TC1300000270.mm.1 | 2,91 |                   | JUC1300000770.mm.1 | -2,1   | 0,026835 | 0,502429 |                     |      |
| TC1300000270.mm.1 | 2,91 |                   | JUC1300000771.mm.1 | -2,12  | 0,003611 | 0,356223 |                     |      |
| TC1300000270.mm.1 | 2,91 |                   | PSR1300001558.mm.1 | -2,34  | 0,000484 | 0,298999 | Cassette Exon       | 0,17 |
| TC1300000270.mm.1 | 2,91 |                   | PSR1300001559.mm.1 | -3,42  | 0,000064 | 0,250119 | Cassette Exon       | 0,2  |

|                   |                                  |                    |       |          |                              |      |
|-------------------|----------------------------------|--------------------|-------|----------|------------------------------|------|
| TC1100003059.mm.1 | 2,71 Tnfsf12Tnfsf13; Tnfsf13; Tr | PSR1100028041.mm.1 | -2,1  | 0,020064 | 0,476524 Cassette Exon       | 0,19 |
| TC1100003059.mm.1 | 2,71 Tnfsf12Tnfsf13; Tnfsf13; Tr | PSR1100028044.mm.1 | -2,15 | 0,019618 | 0,4748 Cassette Exon         | 0,17 |
| TC1100003059.mm.1 | 2,71 Tnfsf12Tnfsf13; Tnfsf13; Tr | JUC1100014695.mm.1 | -2,43 | 0,030518 | 0,51337                      |      |
| TC1100003059.mm.1 | 2,71 Tnfsf12Tnfsf13; Tnfsf13; Tr | PSR1100028048.mm.1 | -2,53 | 0,017278 | 0,463088 Alternative 5' Donc | 0,11 |
| TC1100003059.mm.1 | 2,71 Tnfsf12Tnfsf13; Tnfsf13; Tr | PSR1100028043.mm.1 | -3    | 0,036857 | 0,532257 Cassette Exon       | 0,19 |
| TC0300002601.mm.1 | 1,19                             | PSR0300020286.mm.1 | -2,1  | 0,000079 | 0,25272 Alternative 3' Acce  | 0,18 |
| TC0700004547.mm.1 | -1,01 Muc6                       | PSR0700038335.mm.1 | -2,1  | 0,040471 | 0,542132 Cassette Exon       | 0,18 |
| TC0300000580.mm.1 | 1,56 Ppm1l                       | PSR0300003915.mm.1 | -2,1  | 0,015033 | 0,452111 Alternative 3' Acce | 0,17 |
| TC0400002517.mm.1 | -1,13 Fam214b                    | PSR0400020421.mm.1 | -2,1  | 0,035527 | 0,528764 Cassette Exon       | 0,17 |
| TC1100001469.mm.1 | 1,99 Phospho1; Zfp652            | PSR1100013674.mm.1 | -2,1  | 0,035995 | 0,529506 Alternative 3' Acce | 0,17 |
| TC1400000306.mm.1 | 1,04 Tkt; Mir3076                | PSR1400002484.mm.1 | -2,1  | 0,044828 | 0,552553 Alternative 5' Donc | 0,17 |
| TC1700000839.mm.1 | 1,47 Rcan2                       | PSR1700008067.mm.1 | -2,1  | 0,013178 | 0,44063 Cassette Exon        | 0,17 |
| TC0200005501.mm.1 | 1,64 Cdan1                       | PSR0200037590.mm.1 | -2,1  | 0,014735 | 0,450565 Alternative 3' Acce | 0,16 |
| TC0200005501.mm.1 | 1,64 Cdan1                       | PSR0200037587.mm.1 | -2,11 | 0,005417 | 0,379167 Alternative 3' Acce | 0,13 |
| TC0200005501.mm.1 | 1,64 Cdan1                       | PSR0200037609.mm.1 | -2,32 | 0,025297 | 0,497227 Cassette Exon       | 0,14 |
| TC0200005501.mm.1 | 1,64 Cdan1                       | JUC0200019320.mm.1 | -2,99 | 0,021074 | 0,480364                     |      |
| TC1500001466.mm.1 | 1,64 Sybu                        | PSR1500011206.mm.1 | -2,1  | 0,016824 | 0,460623 Cassette Exon       | 0,11 |
| TC1500001466.mm.1 | 1,64 Sybu                        | PSR1500011195.mm.1 | -2,11 | 0,021096 | 0,480377 Cassette Exon       | 0,04 |
| TC1500001466.mm.1 | 1,64 Sybu                        | PSR1500011200.mm.1 | -2,28 | 0,0274   | 0,503961 Alternative 3' Acce | 0,02 |
| TC1500001466.mm.1 | 1,64 Sybu                        | PSR1500011190.mm.1 | -2,67 | 0,020231 | 0,477145 Cassette Exon       | 0,16 |
| TC1500001466.mm.1 | 1,64 Sybu                        | JUC1500006297.mm.1 | -3,03 | 0,001691 | 0,335395                     |      |
| TC1700001262.mm.1 | -1,13 Plekhh2                    | PSR1700011646.mm.1 | -2,1  | 0,023178 | 0,489982 Alternative 3' Acce | 0,15 |
| TC0400003726.mm.1 | 1,52 Cep85                       | PSR0400030625.mm.1 | -2,1  | 0,015469 | 0,454316 Cassette Exon       | 0,12 |
| TC0400003726.mm.1 | 1,52 Cep85                       | PSR0400030641.mm.1 | -2,68 | 0,002619 | 0,349612 Cassette Exon       | 0,14 |
| TC0400003726.mm.1 | 1,52 Cep85                       | JUC0400015918.mm.1 | -2,76 | 0,048485 | 0,560864                     |      |
| TC0400003726.mm.1 | 1,52 Cep85                       | JUC0400015915.mm.1 | -3,43 | 0,027941 | 0,505612                     |      |
| TC0600002911.mm.1 | 1,33 Gt(ROSA)26Sor               | PSR0600022320.mm.1 | -2,1  | 0,005613 | 0,381163 Alternative 3' Acce | 0,14 |
| TC1700001472.mm.1 | 1,36                             | JUC1700007177.mm.1 | -2,1  | 0,0204   | 0,477881                     |      |
| TC1700001472.mm.1 | 1,36                             | PSR1700013138.mm.1 | -2,53 | 0,01158  | 0,429186 Cassette Exon       | 0,14 |
| TC0400001930.mm.1 | 1,46 Mtor                        | PSR0400015754.mm.1 | -2,1  | 0,027158 | 0,503174 Cassette Exon       | 0,12 |
| TC0600003456.mm.1 | 1,9 Gm16583                      | JUC0600014305.mm.1 | -2,1  | 0,016817 | 0,460623                     |      |
| TC0600003456.mm.1 | 1,9 Gm16583                      | PSR0600027261.mm.1 | -2,34 | 0,017926 | 0,466466 Cassette Exon       | 0,12 |
| TC0900000862.mm.1 | 1,3 Ppib                         | PSR0900006616.mm.1 | -2,1  | 0,00377  | 0,357586 Cassette Exon       | 0,12 |
| TC0100002278.mm.1 | -1,05 Col5a2                     | PSR0100018357.mm.1 | -2,1  | 0,04747  | 0,558545 Cassette Exon       | 0,1  |
| TC0100003412.mm.1 | 1,09 Gorab                       | PSR0100028002.mm.1 | -2,1  | 0,015372 | 0,453849 Cassette Exon       | 0,1  |
| TC0200005502.mm.1 | 1,77 Ttbk2                       | PSR0200037677.mm.1 | -2,1  | 0,005374 | 0,378731 Cassette Exon       | 0,1  |
| TC1300002231.mm.1 | 1,08                             | PSR1300014443.mm.1 | -2,1  | 0,000322 | 0,288663 Cassette Exon       | 0,1  |
| TC0100001855.mm.1 | 1,76 Lpgat1                      | PSR0100015350.mm.1 | -2,1  | 0,049765 | 0,563626 Cassette Exon       | 0,09 |
| TC0200004878.mm.1 | 1,83 Snph                        | PSR0200041438.mm.1 | -2,1  | 0,014384 | 0,44839 Cassette Exon        | 0,08 |
| TC0200004878.mm.1 | 1,83 Snph                        | JUC0200021433.mm.1 | -2,15 | 0,037434 | 0,533831                     |      |
| TC0200004878.mm.1 | 1,83 Snph                        | JUC0200021429.mm.1 | -2,36 | 0,014602 | 0,449914                     |      |
| TC0200004878.mm.1 | 1,83 Snph                        | JUC0200021431.mm.1 | -2,65 | 0,013962 | 0,446239                     |      |
| TC0200004878.mm.1 | 1,83 Snph                        | JUC0200021432.mm.1 | -2,66 | 0,012093 | 0,43255                      |      |
| TC1400001405.mm.1 | -1,03 Gm3453                     | JUC1400005637.mm.1 | -2,1  | 0,034054 | 0,524583                     |      |
| TC0200003482.mm.1 | -1,04                            | JUC0200015032.mm.1 | -2,1  | 0,0367   | 0,531756                     |      |
| TC1400000662.mm.1 | 1,11 Trav11n                     | JUC1400002912.mm.1 | -2,1  | 0,007635 | 0,402113                     |      |
| TC1200000654.mm.1 | -1,05 Gm5068                     | JUC1200002532.mm.1 | -2,1  | 0,045761 | 0,554863                     |      |
| TC1100004122.mm.1 | -1,11 Rhbdf2                     | JUC1100020492.mm.1 | -2,1  | 0,012325 | 0,434392                     |      |

|                   |       |                        |                    |        |          |          |                          |
|-------------------|-------|------------------------|--------------------|--------|----------|----------|--------------------------|
| TC1300001707.mm.1 | -1,02 | 2610307P16Rik          | JUC1300005434.mm.1 | -2,1   | 0,038516 | 0,536564 |                          |
| TC1300000037.mm.1 | 1,21  | Adarb2                 | JUC1300000157.mm.1 | -2,1   | 0,00284  | 0,352207 |                          |
| TC1300000857.mm.1 | -1,1  | Med10                  | JUC1300002900.mm.1 | -2,1   | 0,033153 | 0,521956 |                          |
| TC1700002813.mm.1 | 1,18  | Ppt2                   | JUC1700009599.mm.1 | -2,1   | 0,013728 | 0,444758 |                          |
| TC1700001686.mm.1 | 1     | Rab11fip3              | JUC1700008502.mm.1 | -2,1   | 0,028911 | 0,50858  |                          |
| TC1500001684.mm.1 | 1,64  | Trappc9                | JUC1500007195.mm.1 | -2,1   | 0,029018 | 0,508842 |                          |
| TC1500000418.mm.1 | -1,09 | Fer1l6                 | JUC1500001728.mm.1 | -2,1   | 0,016129 | 0,457772 |                          |
| TC0200000245.mm.1 | -1,43 | Mrc1                   | JUC0200000449.mm.1 | -2,1   | 0,015506 | 0,454456 |                          |
| TC0500002078.mm.1 | 1,01  | Fastk; Gm22333         | JUC0500010316.mm.1 | -2,1   | 0,003609 | 0,356223 |                          |
| TC0800001426.mm.1 | -1,29 | Atp2c2                 | JUC0800006380.mm.1 | -2,1   | 0,043338 | 0,549411 |                          |
| TC0800001077.mm.1 | -1,03 | Mmp2                   | JUC0800004413.mm.1 | -2,1   | 0,00862  | 0,408434 |                          |
| TC0500000682.mm.1 | -1,05 |                        | JUC0500003307.mm.1 | -2,1   | 0,024478 | 0,493992 |                          |
| TC0500001483.mm.1 | 1,05  | Tmem132c               | JUC0500007336.mm.1 | -2,1   | 0,043641 | 0,550199 |                          |
| TC0500001483.mm.1 | 1,05  | Tmem132c               | JUC0500007339.mm.1 | -3,63  | 0,041185 | 0,544121 |                          |
| TC0800002694.mm.1 | -1,32 | Crnde; 4933436C20Rik   | JUC0800011184.mm.1 | -2,1   | 0,012215 | 0,433321 |                          |
| TC0600001657.mm.1 | 1,01  | Aebp2                  | JUC0600006951.mm.1 | -2,1   | 0,042814 | 0,548097 |                          |
| TC0500003606.mm.1 | 1,03  | B230303O12Rik          | JUC0500018019.mm.1 | -2,1   | 0,049445 | 0,563154 |                          |
| TC0500003612.mm.1 | -1,01 |                        | JUC0500018039.mm.1 | -2,1   | 0,027701 | 0,504872 |                          |
| TC0400000284.mm.1 | 1,06  | Rngtt                  | JUC0400000931.mm.1 | -2,1   | 0,024764 | 0,495014 |                          |
| TC1000003103.mm.1 | 1,68  | Arhgef25               | JUC1000012694.mm.1 | -2,1   | 0,005193 | 0,376901 |                          |
| TC0300002256.mm.1 | 1,31  | Gm15535                | JUC0300008933.mm.1 | -2,1   | 0,043544 | 0,549995 |                          |
| TC0300002357.mm.1 | 1     | Il6ra                  | JUC0300009514.mm.1 | -2,1   | 0,009516 | 0,416602 |                          |
| TC0X00000706.mm.1 | 1,07  | Taz                    | JUC0X00002386.mm.1 | -2,1   | 0,030313 | 0,51274  |                          |
| TC0X00002428.mm.1 | -1,09 | Haus7                  | JUC0X00007651.mm.1 | -2,1   | 0,022676 | 0,487637 |                          |
| TC0X00001934.mm.1 | 1,09  | Cfp                    | JUC0X00006204.mm.1 | -2,1   | 0,03986  | 0,54093  |                          |
| TC1000002350.mm.1 | 12,76 | Phyhipl; D630013N20Rik | PSR1000016689.mm.1 | -2,11  | 0,019053 | 0,471978 | Alternative 3' Acce 0,19 |
| TC1000002350.mm.1 | 12,76 | Phyhipl; D630013N20Rik | PSR1000016703.mm.1 | -3,54  | 0,003513 | 0,355749 | Cassette Exon 0,05       |
| TC1000002350.mm.1 | 12,76 | Phyhipl; D630013N20Rik | PSR1000016702.mm.1 | -5,02  | 0,033548 | 0,523131 | Cassette Exon 0,26       |
| TC1000002350.mm.1 | 12,76 | Phyhipl; D630013N20Rik | PSR1000016710.mm.1 | -5,81  | 0,007339 | 0,399128 | Alternative 3' Acce 0,3  |
| TC1000002350.mm.1 | 12,76 | Phyhipl; D630013N20Rik | PSR1000016696.mm.1 | -6,41  | 0,042472 | 0,547627 | Intron Retention 0,75    |
| TC1000002350.mm.1 | 12,76 | Phyhipl; D630013N20Rik | PSR1000016718.mm.1 | -6,49  | 0,007452 | 0,400326 | Cassette Exon 0,21       |
| TC1000002350.mm.1 | 12,76 | Phyhipl; D630013N20Rik | PSR1000016694.mm.1 | -6,75  | 0,009697 | 0,417696 | Alternative 3' Acce 0,51 |
| TC1000002350.mm.1 | 12,76 | Phyhipl; D630013N20Rik | PSR1000016700.mm.1 | -7     | 0,010466 | 0,421696 | Cassette Exon 0,26       |
| TC1000002350.mm.1 | 12,76 | Phyhipl; D630013N20Rik | JUC1000009134.mm.1 | -7,03  | 0,02664  | 0,50179  |                          |
| TC1000002350.mm.1 | 12,76 | Phyhipl; D630013N20Rik | PSR1000016719.mm.1 | -7,19  | 0,013396 | 0,442454 | Cassette Exon 0,21       |
| TC1000002350.mm.1 | 12,76 | Phyhipl; D630013N20Rik | JUC1000009127.mm.1 | -8,15  | 0,010787 | 0,424006 |                          |
| TC1000002350.mm.1 | 12,76 | Phyhipl; D630013N20Rik | PSR1000016692.mm.1 | -8,98  | 0,002046 | 0,341377 | Alternative 3' Acce 0,48 |
| TC1000002350.mm.1 | 12,76 | Phyhipl; D630013N20Rik | PSR1000016699.mm.1 | -9,71  | 0,001486 | 0,329081 | Cassette Exon 0,26       |
| TC1000002350.mm.1 | 12,76 | Phyhipl; D630013N20Rik | PSR1000016716.mm.1 | -10,25 | 0,013336 | 0,441906 | Alternative 3' Acce 0,16 |
| TC1000002350.mm.1 | 12,76 | Phyhipl; D630013N20Rik | PSR1000016704.mm.1 | -10,38 | 0,003439 | 0,3554   | Alternative 5' Donc 0,07 |
| TC1000002350.mm.1 | 12,76 | Phyhipl; D630013N20Rik | JUC1000009123.mm.1 | -11,11 | 0,010885 | 0,424247 |                          |
| TC1000002350.mm.1 | 12,76 | Phyhipl; D630013N20Rik | JUC1000009133.mm.1 | -11,3  | 0,029466 | 0,510123 |                          |
| TC1000002350.mm.1 | 12,76 | Phyhipl; D630013N20Rik | PSR1000016721.mm.1 | -13,5  | 0,003566 | 0,356223 | Cassette Exon 0,21       |
| TC1000002350.mm.1 | 12,76 | Phyhipl; D630013N20Rik | JUC1000009122.mm.1 | -14,63 | 0,01653  | 0,459611 |                          |
| TC1000002350.mm.1 | 12,76 | Phyhipl; D630013N20Rik | PSR1000016722.mm.1 | -16,53 | 0,003864 | 0,358861 | Cassette Exon 0,41       |
| TC1000002350.mm.1 | 12,76 | Phyhipl; D630013N20Rik | JUC1000009136.mm.1 | -17,16 | 0,012732 | 0,436677 |                          |
| TC1000002350.mm.1 | 12,76 | Phyhipl; D630013N20Rik | PSR1000016713.mm.1 | -31,39 | 0,006666 | 0,393187 | Cassette Exon 0,07       |
| TC1000002350.mm.1 | 12,76 | Phyhipl; D630013N20Rik | PSR1000016707.mm.1 | -32,34 | 0,011141 | 0,426226 | Alternative 3' Acce 0,16 |

|                   |                              |                    |        |          |          |                          |
|-------------------|------------------------------|--------------------|--------|----------|----------|--------------------------|
| TC100002350.mm.1  | 12,76 Phyhipl; D630013N20Rik | JUC1000009128.mm.1 | -59,64 | 0,003744 | 0,357586 |                          |
| TC0100000828.mm.1 | 11,19 Sag                    | JUC0100004018.mm.1 | -2,11  | 0,029494 | 0,510123 |                          |
| TC0100000828.mm.1 | 11,19 Sag                    | JUC0100004013.mm.1 | -2,2   | 0,03969  | 0,540368 |                          |
| TC0100000828.mm.1 | 11,19 Sag                    | PSR0100007058.mm.1 | -2,35  | 0,015626 | 0,45509  | Alternative 5' Donc 0,2  |
| TC0100000828.mm.1 | 11,19 Sag                    | PSR0100007075.mm.1 | -2,53  | 0,021402 | 0,48207  | Alternative 5' Donc 0,19 |
| TC0100000828.mm.1 | 11,19 Sag                    | PSR0100007047.mm.1 | -3     | 0,022394 | 0,486603 | Cassette Exon 0,32       |
| TC0100000828.mm.1 | 11,19 Sag                    | PSR0100007059.mm.1 | -4,92  | 0,019438 | 0,474053 | Alternative 3' Acce 0,42 |
| TC0100000828.mm.1 | 11,19 Sag                    | JUC0100004026.mm.1 | -60,52 | 0,002733 | 0,349612 |                          |
| TC1000002870.mm.1 | 3,02 Zdhhc17                 | PSR1000021695.mm.1 | -2,11  | 0,026178 | 0,50003  | Cassette Exon 0,07       |
| TC1000002870.mm.1 | 3,02 Zdhhc17                 | PSR1000021707.mm.1 | -2,97  | 0,00196  | 0,340561 | Cassette Exon 0,21       |
| TC1000002870.mm.1 | 3,02 Zdhhc17                 | PSR1000021704.mm.1 | -3     | 0,015148 | 0,452699 | Alternative 5' Donc 0,31 |
| TC0200000608.mm.1 | -1,09 C130021I20Rik          | PSR0200005586.mm.1 | -2,11  | 0,025377 | 0,497403 | Intron Retention 0,28    |
| TC1900001454.mm.1 | 1,63 Ide                     | PSR1900012678.mm.1 | -2,11  | 0,024367 | 0,49362  | Alternative 3' Acce 0,13 |
| TC1900001454.mm.1 | 1,63 Ide                     | JUC1900006933.mm.1 | -2,67  | 0,017602 | 0,464312 |                          |
| TC1900001454.mm.1 | 1,63 Ide                     | PSR1900012672.mm.1 | -2,69  | 0,016658 | 0,460022 | Cassette Exon 0,24       |
| TC0100000082.mm.1 | 2,44 Kcnb2                   | JUC0100000366.mm.1 | -2,11  | 0,044472 | 0,551693 |                          |
| TC0100000082.mm.1 | 2,44 Kcnb2                   | PSR0100000667.mm.1 | -2,3   | 0,033089 | 0,521723 | Alternative 5' Donc 0,17 |
| TC0100000082.mm.1 | 2,44 Kcnb2                   | PSR0100000659.mm.1 | -2,44  | 0,0095   | 0,416578 | Alternative 3' Acce 0,23 |
| TC0700003648.mm.1 | -1,24 Cemip; 9930013L23Rik   | JUC0700016364.mm.1 | -2,11  | 0,016026 | 0,45713  |                          |
| TC0700003648.mm.1 | -1,24 Cemip; 9930013L23Rik   | PSR0700031010.mm.1 | -2,85  | 0,01799  | 0,466929 | Cassette Exon 0,23       |
| TC0500001487.mm.1 | 1,36 Glt1d1                  | PSR0500013389.mm.1 | -2,11  | 0,041236 | 0,544134 | Cassette Exon 0,15       |
| TC0500001487.mm.1 | 1,36 Glt1d1                  | PSR0500013386.mm.1 | -2,29  | 0,005849 | 0,383669 | Alternative 3' Acce 0,21 |
| TC0500001487.mm.1 | 1,36 Glt1d1                  | JUC0500007349.mm.1 | -2,73  | 0,045857 | 0,555043 |                          |
| TC1500002076.mm.1 | 1,98 Slc2a13                 | PSR1500016788.mm.1 | -2,11  | 0,021838 | 0,484607 | Cassette Exon 0,21       |
| TC1500002076.mm.1 | 1,98 Slc2a13                 | JUC1500009556.mm.1 | -2,52  | 0,010368 | 0,421259 |                          |
| TC1400002621.mm.1 | -1,04 Tbc1d4                 | PSR1400019565.mm.1 | -2,11  | 0,002715 | 0,349612 | Alternative 3' Acce 0,18 |
| TC0500002074.mm.1 | 1,34 Gm15587                 | PSR0500018845.mm.1 | -2,11  | 0,021388 | 0,482022 | Alternative 5' Donc 0,17 |
| TC1700000461.mm.1 | 1,43 Hmga1; Hmga1-rs1        | PSR1700003875.mm.1 | -2,11  | 0,00588  | 0,383835 | Alternative 5' Donc 0,16 |
| TC1700000461.mm.1 | 1,43 Hmga1; Hmga1-rs1        | PSR1700003874.mm.1 | -2,17  | 0,039558 | 0,539764 | Alternative 5' Donc 0,17 |
| TC0100001871.mm.1 | -1,28 Lamb3; 1600010F14Rik   | JUC0100008847.mm.1 | -2,11  | 0,010795 | 0,424049 |                          |
| TC0100001871.mm.1 | -1,28 Lamb3; 1600010F14Rik   | PSR0100015564.mm.1 | -2,22  | 0,012293 | 0,434277 | Cassette Exon 0,16       |
| TC0600001094.mm.1 | 1,11 4930590J08Rik           | JUC0600004384.mm.1 | -2,11  | 0,004424 | 0,366832 |                          |
| TC0600001094.mm.1 | 1,11 4930590J08Rik           | PSR0600008609.mm.1 | -2,18  | 0,008462 | 0,406624 | Cassette Exon 0,16       |
| TC1700000471.mm.1 | -1,04 Scube3                 | JUC1700002192.mm.1 | -2,11  | 0,048185 | 0,560088 |                          |
| TC1700000471.mm.1 | -1,04 Scube3                 | PSR1700004002.mm.1 | -2,18  | 0,03322  | 0,522175 | Alternative 3' Acce 0,16 |
| TC1900000156.mm.1 | 1,58 Nxf1; Tmem223           | PSR1900002073.mm.1 | -2,11  | 0,006524 | 0,391502 | Alternative 3' Acce 0,16 |
| TC1900000156.mm.1 | 1,58 Nxf1; Tmem223           | PSR1900002088.mm.1 | -2,13  | 0,029416 | 0,509995 | Cassette Exon 0,14       |
| TC1400002141.mm.1 | -1,05 Gjb6                   | PSR1400016469.mm.1 | -2,11  | 0,022    | 0,485226 | Alternative 3' Acce 0,15 |
| TC1700000290.mm.1 | 1,36 Zfp758                  | JUC1700001158.mm.1 | -2,11  | 0,036023 | 0,529546 |                          |
| TC1700000290.mm.1 | 1,36 Zfp758                  | PSR1700002147.mm.1 | -2,34  | 0,033657 | 0,523503 | Cassette Exon 0,15       |
| TC1700002185.mm.1 | 1,75 Klhdc3                  | PSR1700020614.mm.1 | -2,11  | 0,046349 | 0,556272 | Cassette Exon 0,15       |
| TC1700002185.mm.1 | 1,75 Klhdc3                  | JUC1700010985.mm.1 | -2,14  | 0,027412 | 0,503961 |                          |
| TC1100000545.mm.1 | 1,6 Gm12197                  | PSR1100004232.mm.1 | -2,11  | 0,027828 | 0,505498 | Alternative 5' Donc 0,15 |
| TC1100000545.mm.1 | 1,6 Gm12197                  | PSR1100004230.mm.1 | -2,16  | 0,021986 | 0,485125 | Alternative 3' Acce 0,15 |
| TC0300000892.mm.1 | 1,06 Sema6c                  | PSR0300006935.mm.1 | -2,11  | 0,024941 | 0,495859 | Cassette Exon 0,13       |
| TC1100001523.mm.1 | 1,37 D030028A08Rik           | PSR1100014006.mm.1 | -2,11  | 0,031632 | 0,517405 | Cassette Exon 0,13       |
| TC1100001523.mm.1 | 1,37 D030028A08Rik           | PSR1100013995.mm.1 | -2,36  | 0,000725 | 0,306408 | Cassette Exon 0,12       |
| TC1100001523.mm.1 | 1,37 D030028A08Rik           | JUC1100007291.mm.1 | -2,36  | 0,030468 | 0,513244 |                          |

|                   |       |                        |                    |       |          |          |                          |
|-------------------|-------|------------------------|--------------------|-------|----------|----------|--------------------------|
| TC1100001523.mm.1 | 1,37  | D030028A08Rik          | JUC1100007289.mm.1 | -2,43 | 0,009507 | 0,416602 |                          |
| TC1100001523.mm.1 | 1,37  | D030028A08Rik          | JUC1100007288.mm.1 | -2,9  | 0,003167 | 0,353901 |                          |
| TC1200002237.mm.1 | 1,27  | Ccdc88c                | PSR1200015395.mm.1 | -2,11 | 0,005151 | 0,37646  | Cassette Exon 0,08       |
| TC1200002237.mm.1 | 1,27  | Ccdc88c                | PSR1200015422.mm.1 | -2,13 | 0,001755 | 0,335996 | Cassette Exon 0,13       |
| TC1200002237.mm.1 | 1,27  | Ccdc88c                | PSR1200015402.mm.1 | -2,15 | 0,003748 | 0,357586 | Cassette Exon 0,11       |
| TC1300000625.mm.1 | 2,01  | Cplx2                  | PSR1300003981.mm.1 | -2,11 | 0,010584 | 0,42255  | Cassette Exon 0,1        |
| TC0300001727.mm.1 | 1,27  | Nlgn1                  | PSR0300013570.mm.1 | -2,11 | 0,004618 | 0,369794 | Cassette Exon 0,07       |
| TC0300001727.mm.1 | 1,27  | Nlgn1                  | PSR0300013561.mm.1 | -2,11 | 0,000935 | 0,313363 | Alternative 3' Acce 0,06 |
| TC0300001727.mm.1 | 1,27  | Nlgn1                  | JUC0300007162.mm.1 | -3,63 | 0,015859 | 0,456449 |                          |
| TC0200002474.mm.1 | -1,14 | Srsf6                  | JUC0200010218.mm.1 | -2,11 | 0,048598 | 0,561095 |                          |
| TC1400001235.mm.1 | 1,24  | Slitrk5                | JUC1400005087.mm.1 | -2,11 | 0,048528 | 0,560991 |                          |
| TC1200000608.mm.1 | -1,41 | Dact1                  | JUC1200002338.mm.1 | -2,11 | 0,034833 | 0,526823 |                          |
| TC0300000767.mm.1 | -1,3  | Kcnn3                  | JUC0300003089.mm.1 | -2,11 | 0,047187 | 0,558068 |                          |
| TC1300002420.mm.1 | 1,42  | Msh3                   | PSR1300016106.mm.1 | -2,11 | 0,004763 | 0,371039 |                          |
| TC1300002420.mm.1 | 1,42  | Msh3                   | JUC1300008486.mm.1 | -2,29 | 0,00884  | 0,410293 |                          |
| TC1300002420.mm.1 | 1,42  | Msh3                   | JUC1300008499.mm.1 | -2,39 | 0,027461 | 0,504045 |                          |
| TC1300002420.mm.1 | 1,42  | Msh3                   | JUC1300008501.mm.1 | -3,77 | 0,047533 | 0,558701 |                          |
| TC1700002329.mm.1 | -1,08 |                        | JUC1700011625.mm.1 | -2,11 | 0,039296 | 0,539125 |                          |
| TC1800000581.mm.1 | 1,06  | 1700011I03Rik          | JUC1800002318.mm.1 | -2,11 | 0,003262 | 0,354243 |                          |
| TC1700001597.mm.1 | 1,2   | Thoc6                  | JUC1700007578.mm.1 | -2,11 | 0,006022 | 0,386586 |                          |
| TC1700001656.mm.1 | 1,02  | Baiap3                 | JUC1700008171.mm.1 | -2,11 | 0,036667 | 0,531675 |                          |
| TC0200002349.mm.1 | 1,04  | Rpl5-ps2; Gm14217      | JUC0200009460.mm.1 | -2,11 | 0,00928  | 0,414799 |                          |
| TC0800000153.mm.1 | -1,21 | Myom2                  | JUC0800000824.mm.1 | -2,11 | 0,031636 | 0,517405 |                          |
| TC0500000985.mm.1 | -1,28 | Mrps18c                | JUC0500004555.mm.1 | -2,11 | 0,016972 | 0,461419 |                          |
| TC0700000831.mm.1 | -1,31 | Pih1d1                 | JUC0700003506.mm.1 | -2,11 | 0,039436 | 0,539642 |                          |
| TC0700000831.mm.1 | -1,31 | Pih1d1                 | JUC0700003505.mm.1 | -2,35 | 0,015777 | 0,455583 |                          |
| TC0700000010.mm.1 | 1,35  | Cacng6                 | JUC0700000044.mm.1 | -2,11 | 0,037412 | 0,533831 |                          |
| TC0300002833.mm.1 | 1,2   | 6530403H02Rik          | JUC0300011680.mm.1 | -2,11 | 0,013721 | 0,444758 |                          |
| TC0300002833.mm.1 | 1,2   | 6530403H02Rik          | JUC0300011685.mm.1 | -2,51 | 0,04489  | 0,55271  |                          |
| TC1000002639.mm.1 | -1,14 | Parppb                 | JUC1000010919.mm.1 | -2,11 | 0,007888 | 0,403771 |                          |
| TC1100002569.mm.1 | 1,28  | Gm12150                | JUC1100012358.mm.1 | -2,11 | 0,027364 | 0,503891 |                          |
| TC1100003374.mm.1 | 1,01  | Nle1                   | JUC1100016185.mm.1 | -2,11 | 0,017177 | 0,46232  |                          |
| TC0300002668.mm.1 | -1,03 | Kcnd3os; 1700095B22Rik | JUC0300010813.mm.1 | -2,11 | 0,022694 | 0,487767 |                          |
| TC1100001459.mm.1 | -1,07 | Fam117a                | JUC1100007104.mm.1 | -2,11 | 0,047063 | 0,557783 |                          |
| TC0300002188.mm.1 | 1,17  | Rapgef2                | JUC0300008628.mm.1 | -2,11 | 0,034433 | 0,525858 |                          |
| TC0300002370.mm.1 | -1,05 | Ints3                  | JUC0300009627.mm.1 | -2,11 | 0,007392 | 0,399603 |                          |
| TC0X00000686.mm.1 | 1,22  | Atp2b3                 | JUC0X00002212.mm.1 | -2,11 | 0,048448 | 0,560744 |                          |
| TC0X00000686.mm.1 | 1,22  | Atp2b3                 | JUC0X00002216.mm.1 | -2,17 | 0,013578 | 0,443703 |                          |
| TC0400002159.mm.1 | 1,89  | Tox                    | PSR0400018131.mm.1 | -2,12 | 0,015153 | 0,452699 | Cassette Exon 0,15       |
| TC0400002159.mm.1 | 1,89  | Tox                    | PSR0400018147.mm.1 | -2,24 | 0,028263 | 0,506565 | Cassette Exon 0,12       |
| TC0400002159.mm.1 | 1,89  | Tox                    | PSR0400018130.mm.1 | -2,46 | 0,012797 | 0,437255 | Cassette Exon 0,15       |
| TC0400002159.mm.1 | 1,89  | Tox                    | PSR0400018135.mm.1 | -2,81 | 0,026897 | 0,502518 | Alternative 3' Acce 0,28 |
| TC0400002159.mm.1 | 1,89  | Tox                    | PSR0400018123.mm.1 | -2,99 | 0,015122 | 0,45267  | Alternative 3' Acce 0,3  |
| TC0400002159.mm.1 | 1,89  | Tox                    | PSR0400018143.mm.1 | -3,3  | 0,025553 | 0,497808 | Alternative 5' Donc 0,36 |
| TC1200001902.mm.1 | 3,09  | Rtn1                   | PSR1200013072.mm.1 | -2,12 | 0,045262 | 0,553703 |                          |
| TC1200001902.mm.1 | 3,09  | Rtn1                   | PSR1200013079.mm.1 | -2,33 | 0,028785 | 0,508161 | Cassette Exon 0,16       |
| TC1200001902.mm.1 | 3,09  | Rtn1                   | PSR1200013067.mm.1 | -3,04 | 0,015487 | 0,454456 | Alternative 3' Acce 0,35 |
| TC1200001902.mm.1 | 3,09  | Rtn1                   | PSR1200013082.mm.1 | -3,07 | 0,046678 | 0,556812 | Alternative 5' Donc 0,21 |



|                       |                                                     |                           |       |          |                              |      |
|-----------------------|-----------------------------------------------------|---------------------------|-------|----------|------------------------------|------|
| TC1200001902.mm.1     | 3,09 Rtn1                                           | PSR1200013083.mm.1        | -3,3  | 0,048479 | 0,560864 Alternative 5' Donc | 0,21 |
| TC1500000478.mm.1     | 2,03 Efr3a                                          | JUC1500001941.mm.1        | -2,12 | 0,010098 | 0,418998                     |      |
| TC1500000478.mm.1     | 2,03 Efr3a                                          | PSR1500003339.mm.1        | -2,13 | 0,000872 | 0,311909 Alternative 5' Donc | 0,21 |
| TC1500000478.mm.1     | 2,03 Efr3a                                          | PSR1500003360.mm.1        | -2,35 | 0,04727  | 0,558223 Alternative 5' Donc | 0,22 |
| TC1500000478.mm.1     | 2,03 Efr3a                                          | PSR1500003373.mm.1        | -2,36 | 0,01984  | 0,475536 Alternative 5' Donc | 0,18 |
| TC1500000478.mm.1     | 2,03 Efr3a                                          | PSR1500003332.mm.1        | -2,52 | 0,001564 | 0,331357 Cassette Exon       | 0,08 |
| TC1500000478.mm.1     | 2,03 Efr3a                                          | PSR1500003331.mm.1        | -2,68 | 0,000817 | 0,311886 Alternative 5' Donc | 0,12 |
| TC1500000478.mm.1     | 2,03 Efr3a                                          | PSR1500003367.mm.1        | -3,19 | 0,041324 | 0,544282 Alternative 5' Donc | 0,32 |
| TC0800000711.mm.1     | 2,08 Atp6v1b2                                       | PSR0800004787.mm.1        | -2,12 | 0,027359 | 0,503858 Intron Retention    | 0,28 |
| TC0800000711.mm.1     | 2,08 Atp6v1b2                                       | PSR0800004791.mm.1        | -2,51 | 0,015631 | 0,45509 Alternative 3' Acce  | 0,24 |
| TC0800000711.mm.1     | 2,08 Atp6v1b2                                       | PSR0800004776.mm.1        | -2,53 | 0,026689 | 0,502057 Alternative 3' Acce | 0,25 |
| TC0800000711.mm.1     | 2,08 Atp6v1b2                                       | PSR0800004770.mm.1        | -2,6  | 0,007926 | 0,403819 Alternative 3' Acce | 0,24 |
| TC1700001266.mm.1     | 1,83 Ppm1b                                          | PSR1700011703.mm.1        | -2,12 | 0,031468 | 0,516922 Cassette Exon       | 0,02 |
| TC1700001266.mm.1     | 1,83 Ppm1b                                          | PSR1700011700.mm.1        | -2,16 | 0,030035 | 0,511774 Cassette Exon       | 0,17 |
| TC1700001266.mm.1     | 1,83 Ppm1b                                          | JUC1700006406.mm.1        | -2,27 | 0,002639 | 0,349612                     |      |
| TC1700001266.mm.1     | 1,83 Ppm1b                                          | PSR1700011713.mm.1        | -3,14 | 0,015039 | 0,452111 Alternative 5' Donc | 0,27 |
| TC1900000415.mm.1     | 1,62 Vldlr                                          | JUC1900002022.mm.1        | -2,12 | 0,038317 | 0,536178                     |      |
| TC1900000415.mm.1     | 1,62 Vldlr                                          | PSR1900003883.mm.1        | -2,14 | 0,046714 | 0,556856 Alternative 5' Donc | 0,18 |
| TC1900000415.mm.1     | 1,62 Vldlr                                          | PSR1900003847.mm.1        | -2,44 | 0,034059 | 0,524583 Alternative 3' Acce | 0,12 |
| TC1900000415.mm.1     | 1,62 Vldlr                                          | PSR1900003877.mm.1        | -2,49 | 0,018456 | 0,468671 Cassette Exon       | 0,25 |
| TC4_JH584294_random00 | 2,95 Ccl27a; LOC100861978; Cc JUC4_JH584294_random  |                           | -2,12 | 0,020519 | 0,478264                     |      |
| TC4_JH584294_random00 | 2,95 Ccl27a; LOC100861978; Cc PSR4_JH584294_random  |                           | -2,98 | 0,002243 | 0,34578 Cassette Exon        | 0,24 |
| TC4_JH584294_random00 | 2,95 Ccl27a; LOC100861978; Cc JUC4_JH584294_random  |                           | -3,88 | 0,002135 | 0,343402                     |      |
| TC4_JH584293_random00 | 3,06 Ccl27a; Ccl27b; LOC10086: JUC4_JH584293_random |                           | -2,12 | 0,032761 | 0,520598                     |      |
| TC4_JH584293_random00 | 3,06 Ccl27a; Ccl27b; LOC10086: PSR4_JH584293_random |                           | -2,95 | 0,003257 | 0,354243 Cassette Exon       | 0,23 |
| TC4_JH584293_random00 | 3,06 Ccl27a; Ccl27b; LOC10086: JUC4_JH584293_random |                           | -3,74 | 0,003439 | 0,3554                       |      |
| TC0400000011.mm.1     | 1,15 Tgs1                                           | PSR0400000067.mm.1        | -2,12 | 0,007416 | 0,399901 Alternative 5' Donc | 0,21 |
| TC1900000745.mm.1     | 2,2                                                 | PSR1900006591.mm.1        | -2,12 | 0,031656 | 0,517405 Alternative 3' Acce | 0,03 |
| TC1900000745.mm.1     | 2,2                                                 | PSR1900006590.mm.1        | -3,09 | 0,020732 | 0,479166 Cassette Exon       | 0,19 |
| TC1600000659.mm.1     | -1,21 BC027231                                      | PSR1600005783.mm.1        | -2,12 | 0,01057  | 0,422432 Alternative 3' Acce | 0,18 |
| TC0200001799.mm.1     | 1,61 AV039307                                       | PSR0200013842.mm.1        | -2,12 | 0,006106 | 0,387239 Cassette Exon       | 0,17 |
| TC0200001799.mm.1     | 1,61 AV039307                                       | JUC0200006924.mm.1        | -2,58 | 0,010061 | 0,418902                     |      |
| TC0800001043.mm.1     | 1,27 Gm3134                                         | PSR0800008068.mm.1        | -2,12 | 0,02069  | 0,478999 Alternative 5' Donc | 0,16 |
| TC1000002496.mm.1     | 1,17 Pcsk4                                          | PSR1000018414.mm.1        | -2,12 | 0,02768  | 0,504734 Alternative 5' Donc | 0,16 |
| TC1300002536.mm.1     | -1,24 Ocln                                          | PSR1300017213.mm.1        | -2,12 | 0,003337 | 0,354243 Alternative 3' Acce | 0,16 |
| TC0800002369.mm.1     | 1,17 Zfp869                                         | PSR0800017835.mm.1        | -2,12 | 0,032164 | 0,518706 Alternative 5' Donc | 0,15 |
| TC1000000165.mm.1     | 1,52 Hbs1l                                          | PSR1000001191.mm.1        | -2,12 | 0,003685 | 0,357266 Cassette Exon       | 0,14 |
| TC0500002539.mm.1     | 1,69 Kctd8                                          | PSR0500022564.mm.1        | -2,12 | 0,035088 | 0,527591 Alternative 5' Donc | 0,13 |
| TC0700000057.mm.1     | 2,3 U2af2                                           | PSR0700000660.mm.1        | -2,12 | 0,047128 | 0,557915 Cassette Exon       | 0,13 |
| TC0700000057.mm.1     | 2,3 U2af2                                           | JUC0700000328.mm.1        | -2,14 | 0,047906 | 0,55942                      |      |
| TC1300000715.mm.1     | 1,15 Rmi1                                           | PSR1300004713.mm.1        | -2,12 | 0,04584  | 0,555021 Alternative 5' Donc | 0,12 |
| TC0600001867.mm.1     | 1,32 Thsd7a                                         | PSR0600014696.mm.1        | -2,12 | 0,002732 | 0,349612 Cassette Exon       | 0,11 |
| TC0600001867.mm.1     | 1,32 Thsd7a                                         | JUC0600007710.mm.1        | -2,52 | 0,00673  | 0,393343                     |      |
| TC0600001867.mm.1     | 1,32 Thsd7a                                         | JUC0600007711.mm.1        | -3,16 | 0,019525 | 0,474538                     |      |
| TC1200000788.mm.1     | 1,4 Rbm25                                           | PSR1200005567.mm.1        | -2,12 | 0,04625  | 0,556168 Alternative 3' Acce | 0,11 |
| TC0400003423.mm.1     | -1,08 Ccdc30                                        | PSR0400027811.mm.1        | -2,12 | 0,007746 | 0,402774 Cassette Exon       | 0,1  |
| TC1200000007.mm.1     | 1,65 Kif3c                                          | PSR1200000053.mm.1        | -2,12 | 0,008784 | 0,409822 Cassette Exon       | 0,1  |
| TC1500001689.mm.1     | 1,38                                                | ago-02 PSR1500012713.mm.1 | -2,12 | 0,000486 | 0,298999 Alternative 3' Acce | 0,08 |

|                   |                     |                    |        |          |                              |      |
|-------------------|---------------------|--------------------|--------|----------|------------------------------|------|
| TC1400002228.mm.1 | -1,06 Prss55        | JUC1400009439.mm.1 | -2,12  | 0,033554 | 0,523131                     |      |
| TC1400001196.mm.1 | -1,27 D130009I18Rik | JUC1400005036.mm.1 | -2,12  | 0,010109 | 0,418998                     |      |
| TC0300001181.mm.1 | 1,2 Dph5            | JUC0300005026.mm.1 | -2,12  | 0,036333 | 0,530547                     |      |
| TC1300001349.mm.1 | -1,2 Gm7120         | JUC1300004400.mm.1 | -2,12  | 0,00211  | 0,342919                     |      |
| TC1300001349.mm.1 | -1,2 Gm7120         | JUC1300004401.mm.1 | -2,12  | 0,00211  | 0,342919                     |      |
| TC1300001349.mm.1 | -1,2 Gm7120         | JUC1300004405.mm.1 | -2,12  | 0,00211  | 0,342919                     |      |
| TC1300002392.mm.1 | -1,29 Vcan          | JUC1300008374.mm.1 | -2,12  | 0,004299 | 0,364027                     |      |
| TC1300002392.mm.1 | -1,29 Vcan          | JUC1300008364.mm.1 | -2,16  | 0,031377 | 0,516345                     |      |
| TC1700002344.mm.1 | 1,49 Khgrp          | JUC1700011750.mm.1 | -2,12  | 0,017897 | 0,466466                     |      |
| TC0100000663.mm.1 | 1,09 Stk11ip        | JUC0100003303.mm.1 | -2,12  | 0,048498 | 0,560886                     |      |
| TC0100003870.mm.1 | -1 Usf1             | JUC0100007435.mm.1 | -2,12  | 0,016272 | 0,45836                      |      |
| TC1500000248.mm.1 | 1,14 Vps13b         | JUC1500001087.mm.1 | -2,12  | 0,002734 | 0,349612                     |      |
| TC0200002013.mm.1 | 1,62 Pank2; Gm14233 | JUC0200008062.mm.1 | -2,12  | 0,033564 | 0,523131                     |      |
| TC1500000719.mm.1 | 1,26 Xpnpep3        | JUC1500003116.mm.1 | -2,12  | 0,037657 | 0,53428                      |      |
| TC1500000719.mm.1 | 1,26 Xpnpep3        | JUC1500003114.mm.1 | -2,16  | 0,040799 | 0,543194                     |      |
| TC1500000719.mm.1 | 1,26 Xpnpep3        | JUC1500003110.mm.1 | -3,25  | 0,023226 | 0,490032                     |      |
| TC1600001827.mm.1 | 1,87 Epha3          | JUC1600007602.mm.1 | -2,12  | 0,005806 | 0,383104                     |      |
| TC1600001827.mm.1 | 1,87 Epha3          | JUC1600007606.mm.1 | -2,34  | 0,006053 | 0,386642                     |      |
| TC1600001827.mm.1 | 1,87 Epha3          | JUC1600007601.mm.1 | -2,49  | 0,003632 | 0,3566                       |      |
| TC1600001827.mm.1 | 1,87 Epha3          | JUC1600007608.mm.1 | -3,84  | 0,018975 | 0,471398                     |      |
| TC0500001885.mm.1 | 1,01 Rbm48          | JUC0500009444.mm.1 | -2,12  | 0,009625 | 0,417315                     |      |
| TC0500002622.mm.1 | 1,01 Gm19590        | JUC0500012604.mm.1 | -2,12  | 0,014044 | 0,44654                      |      |
| TC0500002622.mm.1 | 1,01 Gm19590        | JUC0500012605.mm.1 | -2,32  | 0,035069 | 0,527574                     |      |
| TC0700004270.mm.1 | 1,11                | JUC0700018774.mm.1 | -2,12  | 0,011175 | 0,426409                     |      |
| TC0500000372.mm.1 | 1,23 Gm21446        | JUC0500001952.mm.1 | -2,12  | 0,007628 | 0,402028                     |      |
| TC0500000372.mm.1 | 1,23 Gm21446        | JUC0500001956.mm.1 | -2,61  | 0,002853 | 0,352207                     |      |
| TC0900001472.mm.1 | -1,17 Prss45        | JUC0900006882.mm.1 | -2,12  | 0,024163 | 0,493245                     |      |
| TC0800002803.mm.1 | 1,19 Ccdc79         | JUC0800011722.mm.1 | -2,12  | 0,000659 | 0,304044                     |      |
| TC0600001078.mm.1 | -1,14 Slc41a3       | JUC0600004271.mm.1 | -2,12  | 0,027809 | 0,505442                     |      |
| TC0600001709.mm.1 | -1,06 Lrmp          | JUC0600007124.mm.1 | -2,12  | 0,025574 | 0,497808                     |      |
| TC0600003379.mm.1 | -1,78 Abcc9         | JUC0600013924.mm.1 | -2,12  | 0,009835 | 0,417839                     |      |
| TC0700002078.mm.1 | -1,42 Lsp1          | JUC0700009936.mm.1 | -2,12  | 0,036903 | 0,532283                     |      |
| TC1000002076.mm.1 | 1,53 Sobp           | JUC1000008051.mm.1 | -2,12  | 0,026624 | 0,50179                      |      |
| TC1100001530.mm.1 | 1,04 Osbp17         | JUC1100007342.mm.1 | -2,12  | 0,042459 | 0,547627                     |      |
| TC1100001543.mm.1 | 1,67 Mllt6          | JUC1100007417.mm.1 | -2,12  | 0,00975  | 0,417839                     |      |
| TC1000001049.mm.1 | 1,09                | JUC1000004238.mm.1 | -2,12  | 0,044528 | 0,551885                     |      |
| TC1000001049.mm.1 | 1,09                | JUC1000004241.mm.1 | -2,39  | 0,048794 | 0,561497                     |      |
| TC1000000846.mm.1 | 1,05 Mum1           | JUC1000003454.mm.1 | -2,12  | 0,041727 | 0,545379                     |      |
| TC0900002312.mm.1 | 9,36 Elmod1         | PSR0900019349.mm.1 | -2,13  | 0,000629 | 0,304044 Cassette Exon       | 0,33 |
| TC0900002312.mm.1 | 9,36 Elmod1         | JUC0900010910.mm.1 | -3,17  | 0,006981 | 0,395722                     |      |
| TC0900002312.mm.1 | 9,36 Elmod1         | PSR0900019359.mm.1 | -3,46  | 0,009195 | 0,413763 Alternative 5' Donc | 0,53 |
| TC0900002312.mm.1 | 9,36 Elmod1         | PSR0900019355.mm.1 | -6,34  | 0,000879 | 0,311909 Alternative 5' Donc | 0,48 |
| TC0900002312.mm.1 | 9,36 Elmod1         | JUC0900010916.mm.1 | -6,6   | 0,000081 | 0,25272                      |      |
| TC0900002312.mm.1 | 9,36 Elmod1         | PSR0900019342.mm.1 | -6,82  | 0,005707 | 0,382524 Cassette Exon       | 0,3  |
| TC0900002312.mm.1 | 9,36 Elmod1         | PSR0900019348.mm.1 | -7,72  | 0,004022 | 0,361482 Cassette Exon       | 0,33 |
| TC0900002312.mm.1 | 9,36 Elmod1         | PSR0900019360.mm.1 | -11,33 | 0,004255 | 0,363521 Cassette Exon       | 0,41 |
| TC0900002312.mm.1 | 9,36 Elmod1         | PSR0900019350.mm.1 | -12,72 | 0,001021 | 0,316361 Cassette Exon       | 0,33 |
| TC0900002312.mm.1 | 9,36 Elmod1         | PSR0900019343.mm.1 | -14,6  | 0,000701 | 0,30566 Cassette Exon        | 0,3  |

|                   |       |                         |                    |       |          |          |                     |      |
|-------------------|-------|-------------------------|--------------------|-------|----------|----------|---------------------|------|
| TC1000002689.mm.1 | -1,16 | 4930485B16Rik           | PSR1000020554.mm.1 | -2,13 | 0,040126 | 0,541532 | Cassette Exon       | 0,12 |
| TC1000002689.mm.1 | -1,16 | 4930485B16Rik           | PSR1000020570.mm.1 | -2,19 | 0,023815 | 0,491938 | Cassette Exon       | 0,05 |
| TC1000002689.mm.1 | -1,16 | 4930485B16Rik           | JUC1000011304.mm.1 | -2,21 | 0,002145 | 0,343679 |                     |      |
| TC1000002689.mm.1 | -1,16 | 4930485B16Rik           | PSR1000020555.mm.1 | -2,24 | 0,002065 | 0,341993 | Cassette Exon       | 0,25 |
| TC1000002689.mm.1 | -1,16 | 4930485B16Rik           | PSR1000020583.mm.1 | -2,27 | 0,011733 | 0,429969 | Cassette Exon       | 0,2  |
| TC1000002689.mm.1 | -1,16 | 4930485B16Rik           | PSR1000020581.mm.1 | -2,29 | 0,000252 | 0,28803  | Cassette Exon       | 0,16 |
| TC1000002689.mm.1 | -1,16 | 4930485B16Rik           | PSR1000020558.mm.1 | -2,31 | 0,036934 | 0,532353 | Cassette Exon       | 0,15 |
| TC1000002689.mm.1 | -1,16 | 4930485B16Rik           | JUC1000011283.mm.1 | -2,4  | 0,000296 | 0,288663 |                     |      |
| TC1000002689.mm.1 | -1,16 | 4930485B16Rik           | JUC1000011305.mm.1 | -2,48 | 0,001898 | 0,338712 |                     |      |
| TC1000002689.mm.1 | -1,16 | 4930485B16Rik           | JUC1000011284.mm.1 | -2,62 | 0,020707 | 0,479166 |                     |      |
| TC1000002689.mm.1 | -1,16 | 4930485B16Rik           | PSR1000020567.mm.1 | -2,68 | 0,028493 | 0,507345 | Cassette Exon       | 0,08 |
| TC1000002689.mm.1 | -1,16 | 4930485B16Rik           | JUC1000011298.mm.1 | -2,84 | 0,006851 | 0,393893 |                     |      |
| TC1000002689.mm.1 | -1,16 | 4930485B16Rik           | PSR1000020620.mm.1 | -2,88 | 0,043797 | 0,550419 | Cassette Exon       | 0,25 |
| TC1000002689.mm.1 | -1,16 | 4930485B16Rik           | PSR1000020576.mm.1 | -3,02 | 0,000685 | 0,304511 | Cassette Exon       | 0,28 |
| TC1000002689.mm.1 | -1,16 | 4930485B16Rik           | JUC1000011332.mm.1 | -3,09 | 0,008319 | 0,406313 |                     |      |
| TC1000002689.mm.1 | -1,16 | 4930485B16Rik           | JUC1000011301.mm.1 | -3,12 | 0,000005 | 0,179072 |                     |      |
| TC1000002689.mm.1 | -1,16 | 4930485B16Rik           | JUC1000011346.mm.1 | -3,14 | 0,030517 | 0,51337  |                     |      |
| TC1000002689.mm.1 | -1,16 | 4930485B16Rik           | PSR1000020580.mm.1 | -3,2  | 0,00738  | 0,39943  | Cassette Exon       | 0,19 |
| TC1000002689.mm.1 | -1,16 | 4930485B16Rik           | PSR1000020582.mm.1 | -3,23 | 0,001139 | 0,317344 | Cassette Exon       | 0,33 |
| TC1000002689.mm.1 | -1,16 | 4930485B16Rik           | PSR1000020577.mm.1 | -3,41 | 0,000052 | 0,24627  | Cassette Exon       | 0,35 |
| TC1000002689.mm.1 | -1,16 | 4930485B16Rik           | JUC1000011329.mm.1 | -5,49 | 0,040045 | 0,541323 |                     |      |
| TC0400001630.mm.1 | 2,89  | E130218I03Rik           | JUC0400006727.mm.1 | -2,13 | 0,001617 | 0,332831 |                     |      |
| TC0400001630.mm.1 | 2,89  | E130218I03Rik           | PSR0400012938.mm.1 | -2,29 | 0,026902 | 0,502518 | Intron Retention    | 0,27 |
| TC0400001630.mm.1 | 2,89  | E130218I03Rik           | PSR0400012953.mm.1 | -2,3  | 0,005529 | 0,380518 | Alternative 3' Acce | 0,17 |
| TC0400001630.mm.1 | 2,89  | E130218I03Rik           | PSR0400012930.mm.1 | -2,45 | 0,021077 | 0,480371 | Alternative 3' Acce | 0,32 |
| TC0400001630.mm.1 | 2,89  | E130218I03Rik           | JUC0400006729.mm.1 | -3    | 0,032148 | 0,518586 |                     |      |
| TC0400001630.mm.1 | 2,89  | E130218I03Rik           | PSR0400012931.mm.1 | -3,54 | 0,025624 | 0,497926 | Alternative 3' Acce | 0,32 |
| TC0400001630.mm.1 | 2,89  | E130218I03Rik           | JUC0400006730.mm.1 | -4,47 | 0,022301 | 0,486095 |                     |      |
| TC0900002463.mm.1 | 3,12  | Coro2b                  | PSR0900020621.mm.1 | -2,13 | 0,025591 | 0,497808 | Cassette Exon       | 0,25 |
| TC0900002463.mm.1 | 3,12  | Coro2b                  | PSR0900020627.mm.1 | -2,3  | 0,012707 | 0,436444 | Cassette Exon       | 0,12 |
| TC0900002463.mm.1 | 3,12  | Coro2b                  | PSR0900020626.mm.1 | -3,89 | 0,002279 | 0,345991 | Cassette Exon       | 0,27 |
| TC0900002463.mm.1 | 3,12  | Coro2b                  | JUC0900011621.mm.1 | -4,31 | 0,044534 | 0,551894 |                     |      |
| TC1600001287.mm.1 | 1,42  | Pi4ka                   | JUC1600005420.mm.1 | -2,13 | 0,008728 | 0,409503 |                     |      |
| TC1600001287.mm.1 | 1,42  | Pi4ka                   | PSR1600010483.mm.1 | -2,26 | 0,010238 | 0,420146 | Alternative 5' Donc | 0,2  |
| TC1600001287.mm.1 | 1,42  | Pi4ka                   | JUC1600005427.mm.1 | -2,34 | 0,044343 | 0,551418 |                     |      |
| TC1600001287.mm.1 | 1,42  | Pi4ka                   | PSR1600010461.mm.1 | -2,56 | 0,025763 | 0,498442 | Alternative 3' Acce | 0,17 |
| TC1600001287.mm.1 | 1,42  | Pi4ka                   | PSR1600010420.mm.1 | -2,62 | 0,017992 | 0,466929 | Alternative 5' Donc | 0,26 |
| TC0500000992.mm.1 | 3,29  | Cds1                    | PSR0500008376.mm.1 | -2,13 | 0,044361 | 0,551441 | Cassette Exon       | 0,23 |
| TC0500000992.mm.1 | 3,29  | Cds1                    | JUC0500004590.mm.1 | -2,13 | 0,00248  | 0,349135 |                     |      |
| TC0500000992.mm.1 | 3,29  | Cds1                    | JUC0500004588.mm.1 | -2,95 | 0,027804 | 0,505442 |                     |      |
| TC0500000992.mm.1 | 3,29  | Cds1                    | PSR0500008375.mm.1 | -3,03 | 0,012844 | 0,437766 | Cassette Exon       | 0,2  |
| TC0500000992.mm.1 | 3,29  | Cds1                    | JUC0500004587.mm.1 | -3,42 | 0,025995 | 0,499207 |                     |      |
| TC0500000992.mm.1 | 3,29  | Cds1                    | JUC0500004596.mm.1 | -4,27 | 0,049486 | 0,563298 |                     |      |
| TC1600000253.mm.1 | 1,16  | Hira; Gm15797; RP23-357 | PSR1600002351.mm.1 | -2,13 | 0,01656  | 0,459612 | Intron Retention    | 0,21 |
| TC1700002431.mm.1 | 1,84  | Mtd1; Soga2             | JUC1700012076.mm.1 | -2,13 | 0,045279 | 0,553723 |                     |      |
| TC1700002431.mm.1 | 1,84  | Mtd1; Soga2             | JUC1700012072.mm.1 | -2,41 | 0,028899 | 0,50858  |                     |      |
| TC1700002431.mm.1 | 1,84  | Mtd1; Soga2             | PSR1700022539.mm.1 | -2,61 | 0,041198 | 0,544126 | Alternative 5' Donc | 0,21 |
| TC1700002431.mm.1 | 1,84  | Mtd1; Soga2             | JUC1700012059.mm.1 | -2,79 | 0,007382 | 0,39943  |                     |      |

|                   |                              |                    |       |          |                              |      |
|-------------------|------------------------------|--------------------|-------|----------|------------------------------|------|
| TC1700002431.mm.1 | 1,84 Mtd1; Soga2             | JUC1700012074.mm.1 | -2,84 | 0,011218 | 0,426683                     |      |
| TC1700002431.mm.1 | 1,84 Mtd1; Soga2             | JUC1700012062.mm.1 | -3,4  | 0,003647 | 0,356935                     |      |
| TC1700002431.mm.1 | 1,84 Mtd1; Soga2             | JUC1700012070.mm.1 | -3,84 | 0,04891  | 0,5618                       |      |
| TC0300002939.mm.1 | 1,01 Sec24b                  | PSR0300023279.mm.1 | -2,13 | 0,012398 | 0,434944 Alternative 5' Donc | 0,18 |
| TC0900000714.mm.1 | 1,76 Edc3                    | PSR0900005258.mm.1 | -2,13 | 0,011035 | 0,425682 Alternative 5' Donc | 0,18 |
| TC0900000714.mm.1 | 1,76 Edc3                    | PSR0900005259.mm.1 | -2,6  | 0,00759  | 0,401712 Alternative 5' Donc | 0,18 |
| TC1300002170.mm.1 | -1                           | PSR1300013935.mm.1 | -2,13 | 0,047535 | 0,558701 Alternative 5' Donc | 0,18 |
| TC1100000045.mm.1 | 1,28 Gm11960                 | PSR1100000541.mm.1 | -2,13 | 0,013356 | 0,442083 Alternative 3' Acce | 0,18 |
| TC0800001327.mm.1 | 1,42 Exosc6; Aars            | PSR0800010906.mm.1 | -2,13 | 0,019995 | 0,476227 Alternative 5' Donc | 0,17 |
| TC1100003622.mm.1 | 1,16 Snx11                   | PSR1100033189.mm.1 | -2,13 | 0,020311 | 0,477245 Alternative 5' Donc | 0,17 |
| TC1100003622.mm.1 | 1,16 Snx11                   | JUC1100017369.mm.1 | -2,15 | 0,002224 | 0,345773                     |      |
| TC0200002469.mm.1 | 1,19 9430021M05Rik           | PSR0200020095.mm.1 | -2,13 | 0,030379 | 0,512923 Cassette Exon       | 0,16 |
| TC0500002053.mm.1 | 1,67 Srpk2                   | PSR0500018680.mm.1 | -2,13 | 0,010076 | 0,418974 Alternative 3' Acce | 0,16 |
| TC0500002053.mm.1 | 1,67 Srpk2                   | JUC0500010186.mm.1 | -2,16 | 0,038514 | 0,536557                     |      |
| TC0500002053.mm.1 | 1,67 Srpk2                   | JUC0500010170.mm.1 | -2,29 | 0,030681 | 0,513862                     |      |
| TC0500002053.mm.1 | 1,67 Srpk2                   | PSR0500018663.mm.1 | -2,36 | 0,021382 | 0,482022 Alternative 3' Acce | 0,09 |
| TC0500002053.mm.1 | 1,67 Srpk2                   | PSR0500018661.mm.1 | -2,39 | 0,026168 | 0,50003 Alternative 3' Acce  | 0,15 |
| TC1100002598.mm.1 | 2,13 Cyfip2                  | PSR1100023966.mm.1 | -2,13 | 0,020652 | 0,478862 Cassette Exon       | 0,16 |
| TC1100002598.mm.1 | 2,13 Cyfip2                  | JUC1100012463.mm.1 | -2,14 | 0,021899 | 0,484824                     |      |
| TC0X00000164.mm.1 | 1,75 Rpl3-ps1                | PSR0X00001051.mm.1 | -2,13 | 0,009149 | 0,413447 Alternative 5' Donc | 0,16 |
| TC1100001246.mm.1 | 1,46 Snord7; AA465934; AI45C | PSR1100011682.mm.1 | -2,13 | 0,035541 | 0,528764 Intron Retention    | 0,15 |
| TC1900000978.mm.1 | 1,04 Pcnx13                  | PSR1900008741.mm.1 | -2,13 | 0,042535 | 0,5479 Alternative 3' Acce   | 0,15 |
| TC0900000042.mm.1 | 1,35                         | PSR0900000312.mm.1 | -2,13 | 0,00703  | 0,396042 Alternative 3' Acce | 0,15 |
| TC0600001436.mm.1 | 1,82 Mlf2                    | PSR0600011599.mm.1 | -2,13 | 0,015541 | 0,454617 Alternative 5' Donc | 0,14 |
| TC0900001654.mm.1 | 1,89 Tmem42                  | JUC0900007825.mm.1 | -2,13 | 0,035426 | 0,528707                     |      |
| TC0900001654.mm.1 | 1,89 Tmem42                  | PSR0900013897.mm.1 | -2,47 | 0,021573 | 0,483165 Cassette Exon       | 0,14 |
| TC0900001654.mm.1 | 1,89 Tmem42                  | JUC0900007826.mm.1 | -2,83 | 0,006182 | 0,387873                     |      |
| TC0200002712.mm.1 | 1,22 Gm14444                 | PSR0200022200.mm.1 | -2,13 | 0,003471 | 0,355628 Cassette Exon       | 0,11 |
| TC0200002712.mm.1 | 1,22 Gm14444                 | PSR0200022194.mm.1 | -2,44 | 0,004763 | 0,371039 Cassette Exon       | 0,13 |
| TC0600002385.mm.1 | 1,27 Gprin3                  | PSR0600018463.mm.1 | -2,13 | 0,027973 | 0,505748 Cassette Exon       | 0,13 |
| TC0600003603.mm.1 | 1,43 Grcc10; Rnu7            | PSR0600027674.mm.1 | -2,13 | 0,029237 | 0,509667 Cassette Exon       | 0,13 |
| TC0700004628.mm.1 | 1,43 Prr14                   | PSR0700015815.mm.1 | -2,13 | 0,030968 | 0,514654 Cassette Exon       | 0,13 |
| TC1800000304.mm.1 | 1,41 LOC102639815            | PSR1800002228.mm.1 | -2,13 | 0,026074 | 0,499646 Cassette Exon       | 0,13 |
| TC0400002782.mm.1 | 1,59 Zfp37                   | PSR0400022778.mm.1 | -2,13 | 0,001613 | 0,332831 Alternative 5' Donc | 0,11 |
| TC0400002782.mm.1 | 1,59 Zfp37                   | PSR0400022775.mm.1 | -2,26 | 0,044867 | 0,552613 Alternative 3' Acce | 0,12 |
| TC0400002782.mm.1 | 1,59 Zfp37                   | PSR0400022779.mm.1 | -2,5  | 0,002079 | 0,342181 Alternative 5' Donc | 0,11 |
| TC1600000447.mm.1 | 2,57 Tfrc                    | JUC1600002129.mm.1 | -2,13 | 0,009044 | 0,412827                     |      |
| TC1600000447.mm.1 | 2,57 Tfrc                    | PSR1600004124.mm.1 | -2,41 | 0,007441 | 0,399934 Alternative 3' Acce | 0,12 |
| TC0700000472.mm.1 | 1,23                         | PSR0700003821.mm.1 | -2,13 | 0,003339 | 0,354243 Cassette Exon       | 0,1  |
| TC0800002972.mm.1 | 1,51 Adamts18                | PSR0800022937.mm.1 | -2,13 | 0,0269   | 0,502518 Cassette Exon       | 0,1  |
| TC0800002972.mm.1 | 1,51 Adamts18                | JUC0800012559.mm.1 | -2,46 | 0,026774 | 0,502153                     |      |
| TC0800002972.mm.1 | 1,51 Adamts18                | JUC0800012574.mm.1 | -2,74 | 0,003541 | 0,3562                       |      |
| TC1300002084.mm.1 | 1,48 Trpc7                   | PSR1300013236.mm.1 | -2,13 | 0,036842 | 0,532256 Cassette Exon       | 0,1  |
| TC1300002084.mm.1 | 1,48 Trpc7                   | JUC1300006817.mm.1 | -3,94 | 0,041404 | 0,544627                     |      |
| TC1300002084.mm.1 | 1,48 Trpc7                   | JUC1300006827.mm.1 | -6,1  | 0,015926 | 0,456718                     |      |
| TC1300002084.mm.1 | 1,48 Trpc7                   | JUC1300006824.mm.1 | -6,76 | 0,028372 | 0,506881                     |      |
| TC0X00002403.mm.1 | -1,01 Gabre                  | PSR0X00014818.mm.1 | -2,13 | 0,032938 | 0,521214 Cassette Exon       | 0,09 |
| TC0200005404.mm.1 | 1,73 Cables2                 | JUC0200023723.mm.1 | -2,13 | 0,010434 | 0,421595                     |      |

|                   |                    |                    |        |          |          |                          |
|-------------------|--------------------|--------------------|--------|----------|----------|--------------------------|
| TC1200001567.mm.1 | -1,07 Colec11      | JUC1200005988.mm.1 | -2,13  | 0,004267 | 0,363868 |                          |
| TC0200003717.mm.1 | 1,01 Mettl8        | JUC0200016260.mm.1 | -2,13  | 0,047711 | 0,55896  |                          |
| TC0200004725.mm.1 | 1,39 Tasp1         | JUC0200020952.mm.1 | -2,13  | 0,015526 | 0,454567 |                          |
| TC1700002541.mm.1 | 1,77 Fam98a        | JUC1700012489.mm.1 | -2,13  | 0,034829 | 0,526823 |                          |
| TC1800000509.mm.1 | -1,3 Hsd17b4       | JUC1800002109.mm.1 | -2,13  | 0,029688 | 0,510949 |                          |
| TC1700001881.mm.1 | -1,14 Kifc1        | JUC1700009395.mm.1 | -2,13  | 0,002066 | 0,341993 |                          |
| TC1700001881.mm.1 | -1,14 Kifc1        | JUC1700009394.mm.1 | -2,32  | 0,001783 | 0,336311 |                          |
| TC1900000928.mm.1 | -1,04 Gm960        | JUC1900004486.mm.1 | -2,13  | 0,017715 | 0,465209 |                          |
| TC1800001220.mm.1 | 1,26 Hdac3         | JUC1800005016.mm.1 | -2,13  | 0,016966 | 0,461392 |                          |
| TC1800001220.mm.1 | 1,26 Hdac3         | JUC1800005014.mm.1 | -4     | 0,01086  | 0,424161 |                          |
| TC0200002259.mm.1 | 2,03 Gm14148       | JUC0200008880.mm.1 | -2,13  | 0,012383 | 0,434939 |                          |
| TC1700000637.mm.1 | -1,06 Ager         | JUC1700003425.mm.1 | -2,13  | 0,029018 | 0,508842 |                          |
| TC0200000346.mm.1 | -1,15 Myo3a        | JUC0200000716.mm.1 | -2,13  | 0,006951 | 0,395668 |                          |
| TC1600001133.mm.1 | 1,06 Pam16         | JUC1600004686.mm.1 | -2,13  | 0,039627 | 0,540106 |                          |
| TC0500002130.mm.1 | -1,07 Speer4b      | JUC0500010561.mm.1 | -2,13  | 0,025009 | 0,496061 |                          |
| TC0800001162.mm.1 | 1,03 A330008L17Rik | JUC0800004865.mm.1 | -2,13  | 0,042553 | 0,547959 |                          |
| TC0800001898.mm.1 | -1,4 Adam3         | JUC0800008196.mm.1 | -2,13  | 0,00043  | 0,297771 |                          |
| TC0900001005.mm.1 | 1,39 Fam214a       | JUC0900004223.mm.1 | -2,13  | 0,000247 | 0,28803  |                          |
| TC0900001005.mm.1 | 1,39 Fam214a       | JUC0900004214.mm.1 | -2,18  | 0,031708 | 0,517443 |                          |
| TC0900001005.mm.1 | 1,39 Fam214a       | JUC0900004228.mm.1 | -3,44  | 0,020001 | 0,47625  |                          |
| TC0600000193.mm.1 | -1,06 Ptpnz1       | JUC0600000614.mm.1 | -2,13  | 0,022756 | 0,487931 |                          |
| TC1000001868.mm.1 | -1,61 Eya4         | JUC1000007355.mm.1 | -2,13  | 0,01467  | 0,450098 |                          |
| TC1000002499.mm.1 | 1,14 Mbd3          | JUC1000010141.mm.1 | -2,13  | 0,02888  | 0,50858  |                          |
| TC1000000904.mm.1 | 1,3 Tle2           | PSR1000007174.mm.1 | -2,13  | 0,011896 | 0,431453 |                          |
| TC1000000904.mm.1 | 1,3 Tle2           | JUC1000003865.mm.1 | -2,21  | 0,023839 | 0,491997 |                          |
| TC0X00002084.mm.1 | 1,8 Tmem255a       | JUC0X00006749.mm.1 | -2,13  | 0,042108 | 0,546516 |                          |
| TC0X00002084.mm.1 | 1,8 Tmem255a       | JUC0X00006759.mm.1 | -2,95  | 0,003727 | 0,357586 |                          |
| TC0400002101.mm.1 | 1,15 Fam132a       | JUC0400009280.mm.1 | -2,13  | 0,001266 | 0,322251 |                          |
| TC1000001813.mm.1 | 7,71 Tnfaip3       | JUC1000007221.mm.1 | -2,14  | 0,036317 | 0,530547 |                          |
| TC1000001813.mm.1 | 7,71 Tnfaip3       | PSR1000013222.mm.1 | -2,39  | 0,036203 | 0,530061 | Alternative 3' Acce 0,25 |
| TC1000001813.mm.1 | 7,71 Tnfaip3       | PSR1000013221.mm.1 | -2,49  | 0,000385 | 0,294337 | Cassette Exon 0,41       |
| TC1000001813.mm.1 | 7,71 Tnfaip3       | PSR1000013231.mm.1 | -2,78  | 0,004548 | 0,368844 | Alternative 5' Donc 0,23 |
| TC1000001813.mm.1 | 7,71 Tnfaip3       | PSR1000013234.mm.1 | -3,58  | 0,000089 | 0,255472 | Alternative 5' Donc 0,28 |
| TC1000001813.mm.1 | 7,71 Tnfaip3       | PSR1000013235.mm.1 | -4,13  | 0,000943 | 0,313363 | Cassette Exon 0,41       |
| TC1000001813.mm.1 | 7,71 Tnfaip3       | JUC1000007216.mm.1 | -4,7   | 0,007778 | 0,402902 |                          |
| TC1000001813.mm.1 | 7,71 Tnfaip3       | PSR1000013225.mm.1 | -5,26  | 0,000078 | 0,25272  | Intron Retention 0,75    |
| TC1000001813.mm.1 | 7,71 Tnfaip3       | PSR1000013236.mm.1 | -6,48  | 0,00357  | 0,356223 | Cassette Exon 0,28       |
| TC1000001813.mm.1 | 7,71 Tnfaip3       | PSR1000013238.mm.1 | -6,95  | 0,00327  | 0,354243 | Cassette Exon 0,28       |
| TC1000001813.mm.1 | 7,71 Tnfaip3       | JUC1000007224.mm.1 | -7,13  | 0,014306 | 0,448073 |                          |
| TC1000001813.mm.1 | 7,71 Tnfaip3       | JUC1000007215.mm.1 | -11,38 | 0,000349 | 0,290082 |                          |
| TC0700002413.mm.1 | 10,88 Crx          | PSR0700021197.mm.1 | -2,14  | 0,003707 | 0,35738  | Alternative 3' Acce 0,12 |
| TC0700002413.mm.1 | 10,88 Crx          | PSR0700021202.mm.1 | -5,85  | 0,005781 | 0,383104 | Alternative 5' Donc 0,34 |
| TC0700002413.mm.1 | 10,88 Crx          | PSR0700021205.mm.1 | -7,77  | 0,003138 | 0,353892 | Cassette Exon 0,28       |
| TC0700002413.mm.1 | 10,88 Crx          | PSR0700021203.mm.1 | -10,99 | 0,002357 | 0,34829  | Cassette Exon 0,4        |
| TC0700002413.mm.1 | 10,88 Crx          | JUC0700011293.mm.1 | -21,03 | 0,000905 | 0,313363 |                          |
| TC0700002413.mm.1 | 10,88 Crx          | JUC0700011296.mm.1 | -22,96 | 0,001318 | 0,324348 |                          |
| TC0700002413.mm.1 | 10,88 Crx          | PSR0700021208.mm.1 | -24,21 | 0,000634 | 0,304044 | Alternative 5' Donc 0,48 |
| TC0800002169.mm.1 | 2,06 Stox2         | PSR0800016693.mm.1 | -2,14  | 0,005937 | 0,385008 | Alternative 3' Acce 0,12 |

|                   |                    |                    |       |          |          |                     |      |
|-------------------|--------------------|--------------------|-------|----------|----------|---------------------|------|
| TC0800002169.mm.1 | 2,06 Stox2         | PSR0800016704.mm.1 | -2,47 | 0,02582  | 0,498598 |                     |      |
| TC0800002169.mm.1 | 2,06 Stox2         | JUC0800009098.mm.1 | -2,58 | 0,028228 | 0,506368 |                     |      |
| TC0800002169.mm.1 | 2,06 Stox2         | JUC0800009095.mm.1 | -2,87 | 0,014535 | 0,449545 |                     |      |
| TC0800002169.mm.1 | 2,06 Stox2         | JUC0800009097.mm.1 | -3,08 | 0,001372 | 0,32572  |                     |      |
| TC0800002169.mm.1 | 2,06 Stox2         | PSR0800016708.mm.1 | -3,43 | 0,01691  | 0,460797 | Cassette Exon       | 0,3  |
| TC0200004540.mm.1 | 1,19 Gabpb1        | JUC0200020063.mm.1 | -2,14 | 0,002138 | 0,343494 |                     |      |
| TC0200004540.mm.1 | 1,19 Gabpb1        | JUC0200020065.mm.1 | -2,31 | 0,022103 | 0,485486 |                     |      |
| TC0200004540.mm.1 | 1,19 Gabpb1        | JUC0200020067.mm.1 | -2,31 | 0,023295 | 0,49004  |                     |      |
| TC0200004540.mm.1 | 1,19 Gabpb1        | PSR0200038752.mm.1 | -2,83 | 0,047618 | 0,558743 | Alternative 3' Acce | 0,28 |
| TC0300002879.mm.1 | 2,07 Ndst3         | PSR0300022800.mm.1 | -2,14 | 0,003345 | 0,354243 | Cassette Exon       | 0,2  |
| TC0300002879.mm.1 | 2,07 Ndst3         | PSR0300022805.mm.1 | -2,18 | 0,001595 | 0,33209  | Cassette Exon       | 0,25 |
| TC0300002879.mm.1 | 2,07 Ndst3         | PSR0300022807.mm.1 | -2,46 | 0,030755 | 0,514087 | Cassette Exon       | 0,25 |
| TC0300002879.mm.1 | 2,07 Ndst3         | JUC0300011895.mm.1 | -2,75 | 0,017495 | 0,463964 |                     |      |
| TC0300002879.mm.1 | 2,07 Ndst3         | PSR0300022808.mm.1 | -2,96 | 0,009367 | 0,415193 | Cassette Exon       | 0,25 |
| TC0300002879.mm.1 | 2,07 Ndst3         | PSR0300022806.mm.1 | -3,22 | 0,028634 | 0,50782  | Cassette Exon       | 0,25 |
| TC0300002879.mm.1 | 2,07 Ndst3         | JUC0300011884.mm.1 | -3,53 | 0,043611 | 0,550141 |                     |      |
| TC0300002879.mm.1 | 2,07 Ndst3         | JUC0300011898.mm.1 | -3,65 | 0,031916 | 0,518021 |                     |      |
| TC1100001006.mm.1 | 1,34 Zzef1         | JUC1100004725.mm.1 | -2,14 | 0,025157 | 0,496555 |                     |      |
| TC1100001006.mm.1 | 1,34 Zzef1         | PSR1100009040.mm.1 | -2,79 | 0,042355 | 0,547419 | Cassette Exon       | 0,19 |
| TC1200001663.mm.1 | 1,12 lfrd1         | PSR1200011583.mm.1 | -2,14 | 0,021641 | 0,48367  | Alternative 5' Donc | 0,18 |
| TC1200001663.mm.1 | 1,12 lfrd1         | JUC1200006421.mm.1 | -2,57 | 0,032331 | 0,519155 |                     |      |
| TC0300002002.mm.1 | 2,53               | PSR0300015279.mm.1 | -2,14 | 0,048847 | 0,561704 | Alternative 5' Donc | 0,18 |
| TC0200004974.mm.1 | 1,06 Fam83c        | PSR0200042270.mm.1 | -2,14 | 0,018738 | 0,470733 | Alternative 3' Acce | 0,17 |
| TC0500001656.mm.1 | 1,49 Zfp157        | PSR0500015242.mm.1 | -2,14 | 0,005727 | 0,382767 | Alternative 5' Donc | 0,17 |
| TC0500001656.mm.1 | 1,49 Zfp157        | JUC0500008287.mm.1 | -2,37 | 0,049696 | 0,563531 |                     |      |
| TC0500001656.mm.1 | 1,49 Zfp157        | JUC0500008289.mm.1 | -2,41 | 0,002575 | 0,349501 |                     |      |
| TC0700002039.mm.1 | -1,11 Ptdss2       | PSR0700017994.mm.1 | -2,14 | 0,038335 | 0,53622  | Alternative 3' Acce | 0,17 |
| TC1700000550.mm.1 | 1,63 Rrp1b         | PSR1700005034.mm.1 | -2,14 | 0,018299 | 0,468049 | Alternative 3' Acce | 0,16 |
| TC1400002081.mm.1 | 1,19 Jph4          | PSR1400015874.mm.1 | -2,14 | 0,004016 | 0,361291 | Alternative 5' Donc | 0,13 |
| TC0200003263.mm.1 | 1,43 Zer1          | PSR0200027516.mm.1 | -2,14 | 0,017637 | 0,46458  | Cassette Exon       | 0,12 |
| TC0800001436.mm.1 | 1,94 6430548M08Rik | PSR0800011755.mm.1 | -2,14 | 0,016607 | 0,459815 | Cassette Exon       | 0,12 |
| TC0800001436.mm.1 | 1,94 6430548M08Rik | PSR0800011756.mm.1 | -2,44 | 0,010866 | 0,424174 | Cassette Exon       | 0,12 |
| TC0800001436.mm.1 | 1,94 6430548M08Rik | JUC0800006457.mm.1 | -4,53 | 0,010857 | 0,424161 |                     |      |
| TC0300000367.mm.1 | 1,04 Mgst2         | PSR0300002629.mm.1 | -2,14 | 0,011938 | 0,431717 | Cassette Exon       | 0,11 |
| TC0800000168.mm.1 | -1,07 Mcph1        | PSR0800001512.mm.1 | -2,14 | 0,048697 | 0,561345 | Cassette Exon       | 0,11 |
| TC1100003588.mm.1 | 1,34 Kat7          | PSR1100032927.mm.1 | -2,14 | 0,015211 | 0,452773 | Cassette Exon       | 0,09 |
| TC1100003588.mm.1 | 1,34 Kat7          | PSR1100032930.mm.1 | -2,7  | 0,001267 | 0,322251 | Alternative 5' Donc | 0,11 |
| TC1100003588.mm.1 | 1,34 Kat7          | JUC1100017244.mm.1 | -2,97 | 0,003056 | 0,353892 |                     |      |
| TC1100003588.mm.1 | 1,34 Kat7          | JUC1100017261.mm.1 | -4,04 | 0,014315 | 0,448078 |                     |      |
| TC1700001663.mm.1 | -1,29              | PSR1700015170.mm.1 | -2,14 | 0,021364 | 0,481952 | Cassette Exon       | 0,11 |
| TC0200001847.mm.1 | -1,11 Duox1        | PSR0200014346.mm.1 | -2,14 | 0,000367 | 0,291725 | Cassette Exon       | 0,1  |
| TC0500003371.mm.1 | 1,58 Gtf2ird1      | PSR0500030400.mm.1 | -2,14 | 0,000675 | 0,304338 | Cassette Exon       | 0,1  |
| TC0500003371.mm.1 | 1,58 Gtf2ird1      | JUC0500016511.mm.1 | -2,28 | 0,026527 | 0,501411 |                     |      |
| TC0500003371.mm.1 | 1,58 Gtf2ird1      | JUC0500016542.mm.1 | -4,73 | 0,007824 | 0,403089 |                     |      |
| TC0700002715.mm.1 | 2,25 Spred3        | PSR0700023952.mm.1 | -2,14 | 0,013993 | 0,446353 | Cassette Exon       | 0,1  |
| TC0700002715.mm.1 | 2,25 Spred3        | PSR0700023945.mm.1 | -2,18 | 0,000668 | 0,304088 | Cassette Exon       | 0,08 |
| TC1100000979.mm.1 | 1,2 Wscd1          | PSR1100008783.mm.1 | -2,14 | 0,014009 | 0,446353 | Cassette Exon       | 0,1  |
| TC1100000979.mm.1 | 1,2 Wscd1          | JUC1100004593.mm.1 | -2,29 | 0,018025 | 0,46697  |                     |      |

|                    |                              |                    |       |          |                              |      |
|--------------------|------------------------------|--------------------|-------|----------|------------------------------|------|
| TC1100004094.mm.1  | 1,31 Recql5                  | PSR1100038532.mm.1 | -2,14 | 0,021822 | 0,484598 Alternative 5' Donc | 0,09 |
| TC0300000365.mm.1  | 1,1                          | JUC0300001340.mm.1 | -2,14 | 0,031064 | 0,515094                     |      |
| TC1300002318.mm.1  | 1,62 Sdha                    | JUC1300008008.mm.1 | -2,14 | 0,01441  | 0,448751                     |      |
| TC0200004608.mm.1  | 1,67 Pdyn                    | JUC0200020447.mm.1 | -2,14 | 0,0015   | 0,329714                     |      |
| TC0100002365.mm.1  | 1,07 Satb2                   | JUC0100010891.mm.1 | -2,14 | 0,006078 | 0,386691                     |      |
| TC0100000933.mm.1  | -1,03 Ano7                   | JUC0100004542.mm.1 | -2,14 | 0,020916 | 0,479793                     |      |
| TC0100000927.mm.1  | -1,81 Sned1; Mir6901; mmu-mi | JUC0100004518.mm.1 | -2,14 | 0,012773 | 0,437233                     |      |
| TC1900001056.mm.1  | -1,33 Slc22a26               | JUC1900005379.mm.1 | -2,14 | 0,009314 | 0,414883                     |      |
| TC1800001581.mm.1  | 1,29 Me2                     | JUC1800006373.mm.1 | -2,14 | 0,022144 | 0,485609                     |      |
| TC1800001581.mm.1  | 1,29 Me2                     | JUC1800006378.mm.1 | -3,04 | 0,005771 | 0,383104                     |      |
| TC1800001581.mm.1  | 1,29 Me2                     | JUC1800006375.mm.1 | -5,99 | 0,000344 | 0,289576                     |      |
| TC1900000065.mm.1  | 1,39 Al837181                | JUC1900000419.mm.1 | -2,14 | 0,00532  | 0,378059                     |      |
| TC1900000167.mm.1  | 1,56 Eml3                    | JUC1900001136.mm.1 | -2,14 | 0,028434 | 0,507218                     |      |
| TC1900000167.mm.1  | 1,56 Eml3                    | JUC1900001150.mm.1 | -2,15 | 0,019526 | 0,474538                     |      |
| TC0200002327.mm.1  | 1,08 Bpifb2                  | JUC0200009238.mm.1 | -2,14 | 0,036408 | 0,53088                      |      |
| TC0100003848.mm.1  | -1,06                        | JUC0100017862.mm.1 | -2,14 | 0,019786 | 0,475149                     |      |
| TC1700000384.mm.1  | -1,16 Mslnl                  | JUC1700001752.mm.1 | -2,14 | 0,045403 | 0,554085                     |      |
| TC0800001727.mm.1  | 1,06 Pcid2                   | JUC0800007601.mm.1 | -2,14 | 0,006119 | 0,387322                     |      |
| TC0800001727.mm.1  | 1,06 Pcid2                   | JUC0800007618.mm.1 | -2,95 | 0,013507 | 0,443256                     |      |
| TC0500002235.mm.1  | 1,01                         | JUC0500011144.mm.1 | -2,14 | 0,033103 | 0,521762                     |      |
| TC0900001638.mm.1  | -1,23 Abhd5                  | JUC0900007724.mm.1 | -2,14 | 0,01671  | 0,460199                     |      |
| TC0700004620.mm.1  | 1,16 Sbsn                    | JUC0700002569.mm.1 | -2,14 | 0,00679  | 0,393554                     |      |
| TC0700000161.mm.1  | 1,13 Lig1                    | JUC0700000603.mm.1 | -2,14 | 0,008608 | 0,40841                      |      |
| TC0600001093.mm.1  | 1,76 Ccdc174                 | JUC0600004361.mm.1 | -2,14 | 0,018882 | 0,471134                     |      |
| TC06000003114.mm.1 | -1,07 Ptpn6                  | JUC0600012556.mm.1 | -2,14 | 0,017344 | 0,46353                      |      |
| TC0500003411.mm.1  | 1,02 Srcrb4d                 | JUC0500016780.mm.1 | -2,14 | 0,042053 | 0,546234                     |      |
| TC07000003530.mm.1 | 1,04 AU020206                | PSR0700029861.mm.1 | -2,14 | 0,042379 | 0,547533                     |      |
| TC0700001715.mm.1  | -1,18 Acsm3                  | JUC0700007436.mm.1 | -2,14 | 0,043498 | 0,549901                     |      |
| TC0400004191.mm.1  | 1,61 Slc6a9                  | PSR0400009723.mm.1 | -2,14 | 0,034287 | 0,525366                     |      |
| TC0400004191.mm.1  | 1,61 Slc6a9                  | JUC0400005103.mm.1 | -2,6  | 0,044141 | 0,551024                     |      |
| TC0400004191.mm.1  | 1,61 Slc6a9                  | JUC0400005108.mm.1 | -3,07 | 0,007611 | 0,401767                     |      |
| TC0300002481.mm.1  | -1,13 Adamts14               | JUC0300010005.mm.1 | -2,14 | 0,036261 | 0,530445                     |      |
| TC1100001216.mm.1  | 1,54                         | JUC1100006003.mm.1 | -2,14 | 0,039836 | 0,540922                     |      |
| TC0900003310.mm.1  | 1,15 Lztf1                   | JUC0900015705.mm.1 | -2,14 | 0,004104 | 0,36228                      |      |
| TC0400002792.mm.1  | -1,06 Pole3                  | JUC0400011935.mm.1 | -2,14 | 0,002648 | 0,349612                     |      |
| TC0900002972.mm.1  | 1,63 Tmem108                 | JUC0900013667.mm.1 | -2,14 | 0,011673 | 0,429939                     |      |
| TC1000000015.mm.1  | 1,25 Mthfd1l                 | JUC1000000063.mm.1 | -2,14 | 0,017165 | 0,46232                      |      |
| TC0400002531.mm.1  | 1,69 Gba2                    | PSR0400020693.mm.1 | -2,15 | 0,001635 | 0,332976 Alternative 5' Donc | 0,1  |
| TC0400002531.mm.1  | 1,69 Gba2                    | PSR0400020688.mm.1 | -2,6  | 0,014542 | 0,449545 Intron Retention    | 0,36 |
| TC0500003221.mm.1  | 1,23 Kdm2b                   | PSR0500028854.mm.1 | -2,15 | 0,032381 | 0,519221 Cassette Exon       | 0,1  |
| TC0500003221.mm.1  | 1,23 Kdm2b                   | PSR0500028828.mm.1 | -3,49 | 0,043683 | 0,550236 Alternative 3' Acce | 0,29 |
| TC1400000858.mm.1  | 1,47 Sacs                    | JUC1400003783.mm.1 | -2,15 | 0,006675 | 0,393187                     |      |
| TC1400000858.mm.1  | 1,47 Sacs                    | PSR1400007012.mm.1 | -2,47 | 0,000472 | 0,298999 Alternative 3' Acce | 0,26 |
| TC0300000881.mm.1  | 1,14 Rfx5                    | JUC0300003562.mm.1 | -2,15 | 0,014609 | 0,449914                     |      |
| TC0300000881.mm.1  | 1,14 Rfx5                    | PSR0300006839.mm.1 | -2,62 | 0,013352 | 0,442045 Alternative 5' Donc | 0,25 |
| TC0500002968.mm.1  | 1,33                         | PSR0500026261.mm.1 | -2,15 | 0,024617 | 0,494589 Intron Retention    | 0,23 |
| TC0800003025.mm.1  | 1,07 Taf1c                   | PSR0800023278.mm.1 | -2,15 | 0,025007 | 0,496061 Alternative 3' Acce | 0,09 |
| TC0800003025.mm.1  | 1,07 Taf1c                   | PSR0800023272.mm.1 | -2,32 | 0,02093  | 0,479886 Alternative 3' Acce | 0,2  |

|                   |                             |                    |       |          |                              |      |
|-------------------|-----------------------------|--------------------|-------|----------|------------------------------|------|
| TC0800003025.mm.1 | 1,07 Taf1c                  | PSR0800023281.mm.1 | -2,5  | 0,013779 | 0,444974 Cassette Exon       | 0,14 |
| TC0100001037.mm.1 | 1,74 Cdh7                   | PSR0100008629.mm.1 | -2,15 | 0,037642 | 0,534212 Alternative 5' Donc | 0,19 |
| TC0100001037.mm.1 | 1,74 Cdh7                   | PSR0100008602.mm.1 | -2,27 | 0,018218 | 0,467632                     |      |
| TC0100001037.mm.1 | 1,74 Cdh7                   | PSR0100008627.mm.1 | -2,3  | 0,004517 | 0,368648 Alternative 5' Donc | 0,19 |
| TC0100001037.mm.1 | 1,74 Cdh7                   | JUC0100004965.mm.1 | -2,35 | 0,01496  | 0,452048                     |      |
| TC0100001037.mm.1 | 1,74 Cdh7                   | JUC0100004983.mm.1 | -2,68 | 0,018536 | 0,469204                     |      |
| TC0100001037.mm.1 | 1,74 Cdh7                   | JUC0100004979.mm.1 | -2,69 | 0,014988 | 0,452048                     |      |
| TC0100001037.mm.1 | 1,74 Cdh7                   | JUC0100004981.mm.1 | -3,84 | 0,04661  | 0,556801                     |      |
| TC0100001037.mm.1 | 1,74 Cdh7                   | PSR0100008625.mm.1 | -3,87 | 0,0078   | 0,403089                     |      |
| TC1100001194.mm.1 | 1,14 Suz12                  | PSR1100011083.mm.1 | -2,15 | 0,049529 | 0,563325 Alternative 3' Acce | 0,19 |
| TC0300002741.mm.1 | -1,18 Celsr2                | PSR0300021501.mm.1 | -2,15 | 0,013322 | 0,441836 Alternative 3' Acce | 0,18 |
| TC1100003766.mm.1 | 1,59 Hap1                   | PSR1100034583.mm.1 | -2,15 | 0,006474 | 0,390467 Alternative 5' Donc | 0,18 |
| TC1100003766.mm.1 | 1,59 Hap1                   | PSR1100034576.mm.1 | -2,48 | 0,002454 | 0,349135 Cassette Exon       | 0,14 |
| TC1100003766.mm.1 | 1,59 Hap1                   | JUC1100018092.mm.1 | -2,76 | 0,048368 | 0,56056                      |      |
| TC0700001430.mm.1 | 1,02 Stard10                | PSR0700012195.mm.1 | -2,15 | 0,001752 | 0,335996 Alternative 5' Donc | 0,17 |
| TC0700002093.mm.1 | 1,2                         | PSR0700018885.mm.1 | -2,15 | 0,017371 | 0,463612 Alternative 3' Acce | 0,17 |
| TC0500003202.mm.1 | 1,58 Cux2                   | PSR0500028574.mm.1 | -2,15 | 0,002288 | 0,34605 Cassette Exon        | 0,09 |
| TC0500003202.mm.1 | 1,58 Cux2                   | PSR0500028552.mm.1 | -2,24 | 0,008689 | 0,408815 Alternative 5' Donc | 0,12 |
| TC0500003202.mm.1 | 1,58 Cux2                   | JUC0500015541.mm.1 | -2,37 | 0,007765 | 0,402774                     |      |
| TC0500003202.mm.1 | 1,58 Cux2                   | PSR0500028561.mm.1 | -2,51 | 0,002856 | 0,352207 Cassette Exon       | 0,16 |
| TC0700003464.mm.1 | -1,31 Arrdc4                | PSR0700029482.mm.1 | -2,15 | 0,016716 | 0,460202 Cassette Exon       | 0,16 |
| TC0700003464.mm.1 | -1,31 Arrdc4                | PSR0700029487.mm.1 | -2,16 | 0,008141 | 0,405394 Cassette Exon       | 0,11 |
| TC0100003533.mm.1 | -1,33 Fcer1g                | PSR0100028905.mm.1 | -2,15 | 0,025037 | 0,496091 Cassette Exon       | 0,14 |
| TC0200004975.mm.1 | 1,39 Uqcc1; Uqcc            | PSR0200042300.mm.1 | -2,15 | 0,048331 | 0,560493 Alternative 3' Acce | 0,14 |
| TC1800001377.mm.1 | -1,08 4930511M06Rik; 170006 | PSR1800010057.mm.1 | -2,15 | 0,000381 | 0,293183 Cassette Exon       | 0,14 |
| TC1700000805.mm.1 | 1,07 Esp18                  | PSR1700007818.mm.1 | -2,15 | 0,005776 | 0,383104 Cassette Exon       | 0,13 |
| TC0700000056.mm.1 | 1,53 Ccdc106                | PSR0700000639.mm.1 | -2,15 | 0,029471 | 0,510123 Alternative 3' Acce | 0,12 |
| TC0200000406.mm.1 | 1,23 Anapc2                 | PSR0200002269.mm.1 | -2,15 | 0,007689 | 0,402552 Cassette Exon       | 0,11 |
| TC0700000250.mm.1 | 1,43 Psg16                  | PSR0700001857.mm.1 | -2,15 | 0,002102 | 0,342919 Cassette Exon       | 0,11 |
| TC1100003064.mm.1 | 1,85 Fgf11                  | PSR1100028127.mm.1 | -2,15 | 0,007868 | 0,403545 Cassette Exon       | 0,11 |
| TC1100003064.mm.1 | 1,85 Fgf11                  | JUC1100014743.mm.1 | -3,22 | 0,039747 | 0,540496                     |      |
| TC1600001245.mm.1 | 1,24 Marf1                  | PSR1600009960.mm.1 | -2,15 | 0,026904 | 0,502518 Alternative 3' Acce | 0,1  |
| TC0900000448.mm.1 | 1,23 Tmem225                | PSR0900002933.mm.1 | -2,15 | 0,00659  | 0,39213 Cassette Exon        | 0,09 |
| TC1400001030.mm.1 | -1,08                       | JUC1400004407.mm.1 | -2,15 | 0,030645 | 0,513747                     |      |
| TC1400002072.mm.1 | 1,05 Efs                    | JUC1400008548.mm.1 | -2,15 | 0,035153 | 0,527974                     |      |
| TC1100004220.mm.1 | 1,05 Pcyt2                  | JUC1100021134.mm.1 | -2,15 | 0,001589 | 0,331726                     |      |
| TC1300000009.mm.1 | 1,53 Asb13                  | JUC1300000044.mm.1 | -2,15 | 0,048129 | 0,559938                     |      |
| TC1300000285.mm.1 | -1,07 Dcdc2a                | JUC1300000909.mm.1 | -2,15 | 0,013997 | 0,446353                     |      |
| TC1700002293.mm.1 | 1,09 Slc5a7                 | JUC1700011428.mm.1 | -2,15 | 0,030601 | 0,513461                     |      |
| TC1700002293.mm.1 | 1,09 Slc5a7                 | JUC1700011431.mm.1 | -2,64 | 0,006381 | 0,389522                     |      |
| TC1700001484.mm.1 | -1,56 Thbs2                 | JUC1700007221.mm.1 | -2,15 | 0,010955 | 0,425094                     |      |
| TC1900000563.mm.1 | 1 Cyp2c65                   | JUC1900002711.mm.1 | -2,15 | 0,039508 | 0,539762                     |      |
| TC1500002277.mm.1 | -1,15 Krt76                 | JUC1500010724.mm.1 | -2,15 | 0,047333 | 0,558291                     |      |
| TC1600000044.mm.1 | 1,1 Ubn1                    | JUC1600000198.mm.1 | -2,15 | 0,031976 | 0,518183                     |      |
| TC1500000561.mm.1 | 1,23 Rhpn1                  | JUC1500002278.mm.1 | -2,15 | 0,000568 | 0,304044                     |      |
| TC1500000561.mm.1 | 1,23 Rhpn1                  | JUC1500002263.mm.1 | -2,41 | 0,042692 | 0,548097                     |      |
| TC1700000313.mm.1 | -1,11 Zscan10               | PSR1700002272.mm.1 | -2,15 | 0,036725 | 0,531766                     |      |
| TC1700000344.mm.1 | -1,03 Pkd1                  | JUC1700001422.mm.1 | -2,15 | 0,038223 | 0,535805                     |      |



|                   |                              |                    |       |          |          |                          |
|-------------------|------------------------------|--------------------|-------|----------|----------|--------------------------|
| TC0200000055.mm.1 | -1,04 Nudt5                  | JUC0200000168.mm.1 | -2,15 | 0,000379 | 0,293011 |                          |
| TC0200000019.mm.1 | 1,67 Frmd4a                  | JUC0200000091.mm.1 | -2,15 | 0,030682 | 0,513862 |                          |
| TC0200000552.mm.1 | -1,07 Fubp3                  | JUC0200002431.mm.1 | -2,15 | 0,016557 | 0,459612 |                          |
| TC1600001276.mm.1 | -1,07 Ppil2                  | JUC1600005381.mm.1 | -2,15 | 0,040946 | 0,543423 |                          |
| TC0500001650.mm.1 | 1,81 6330418K02Rik           | PSR0500015157.mm.1 | -2,15 | 0,0024   | 0,348564 |                          |
| TC0700000683.mm.1 | 1,04                         | JUC0700002849.mm.1 | -2,15 | 0,001938 | 0,340349 |                          |
| TC0600001944.mm.1 | -1,22 Wasl                   | JUC0600008004.mm.1 | -2,15 | 0,000327 | 0,28927  |                          |
| TC1100002683.mm.1 | 1,53 Zfp2                    | JUC1100012704.mm.1 | -2,15 | 0,014234 | 0,447947 |                          |
| TC1100002683.mm.1 | 1,53 Zfp2                    | JUC1100012713.mm.1 | -2,15 | 0,043542 | 0,549995 |                          |
| TC1100002683.mm.1 | 1,53 Zfp2                    | JUC1100012705.mm.1 | -2,26 | 0,025547 | 0,497808 |                          |
| TC1100002683.mm.1 | 1,53 Zfp2                    | JUC1100012710.mm.1 | -4,08 | 0,041095 | 0,543933 |                          |
| TC1100002705.mm.1 | 1,45 Gm26551                 | JUC1100012817.mm.1 | -2,15 | 0,035913 | 0,529399 |                          |
| TC0400003418.mm.1 | -1,15 Ermap                  | JUC0400014433.mm.1 | -2,15 | 0,003987 | 0,360652 |                          |
| TC0400003461.mm.1 | 6,37 Gm8359                  | JUC0400014629.mm.1 | -2,15 | 0,039898 | 0,54093  |                          |
| TC0X00001028.mm.1 | -1,07 Jpx; Gm9157            | JUC0X00003430.mm.1 | -2,15 | 0,036985 | 0,532502 |                          |
| TC0400002949.mm.1 | 2,29 Psip1                   | PSR0400023991.mm.1 | -2,16 | 0,021475 | 0,482555 | Cassette Exon 0,12       |
| TC0400002949.mm.1 | 2,29 Psip1                   | PSR0400023970.mm.1 | -2,2  | 0,000304 | 0,288663 | Cassette Exon 0,18       |
| TC0400002949.mm.1 | 2,29 Psip1                   | PSR0400023989.mm.1 | -2,25 | 0,019408 | 0,473802 | Alternative 5' Donc 0,2  |
| TC0400002949.mm.1 | 2,29 Psip1                   | JUC0400012516.mm.1 | -2,25 | 0,002491 | 0,349135 |                          |
| TC0400002949.mm.1 | 2,29 Psip1                   | PSR0400023992.mm.1 | -2,37 | 0,021954 | 0,485095 | Cassette Exon 0,12       |
| TC0400002949.mm.1 | 2,29 Psip1                   | PSR0400023969.mm.1 | -2,39 | 0,004773 | 0,371044 | Cassette Exon 0,15       |
| TC0400002949.mm.1 | 2,29 Psip1                   | JUC0400012528.mm.1 | -3,01 | 0,015421 | 0,454066 |                          |
| TC0400002949.mm.1 | 2,29 Psip1                   | PSR0400023968.mm.1 | -6,13 | 0,001508 | 0,330175 | Alternative 5' Donc 0,34 |
| TC0200002836.mm.1 | 3,66 Pcmt2                   | PSR0200023531.mm.1 | -2,16 | 0,047213 | 0,558132 | Cassette Exon 0,19       |
| TC0200002836.mm.1 | 3,66 Pcmt2                   | PSR0200023543.mm.1 | -2,31 | 0,003082 | 0,353892 | Cassette Exon 0,07       |
| TC0200002836.mm.1 | 3,66 Pcmt2                   | JUC0200011930.mm.1 | -2,52 | 0,017027 | 0,461729 |                          |
| TC0200002836.mm.1 | 3,66 Pcmt2                   | JUC0200011932.mm.1 | -2,64 | 0,017545 | 0,464137 |                          |
| TC0200002836.mm.1 | 3,66 Pcmt2                   | PSR0200023529.mm.1 | -4,76 | 0,004395 | 0,366181 | Alternative 3' Acce 0,29 |
| TC0200002836.mm.1 | 3,66 Pcmt2                   | JUC0200011937.mm.1 | -7,42 | 0,000267 | 0,28803  |                          |
| TC0200002836.mm.1 | 3,66 Pcmt2                   | JUC0200011934.mm.1 | -8,09 | 0,008032 | 0,40434  |                          |
| TC0500001526.mm.1 | 2,21 Rabgef1                 | PSR0500013783.mm.1 | -2,16 | 0,012604 | 0,435933 | Cassette Exon 0,12       |
| TC0500001526.mm.1 | 2,21 Rabgef1                 | PSR0500013802.mm.1 | -2,25 | 0,00797  | 0,403853 | Alternative 3' Acce 0,17 |
| TC0500001526.mm.1 | 2,21 Rabgef1                 | PSR0500013804.mm.1 | -2,35 | 0,008263 | 0,405976 | Intron Retention 0,23    |
| TC0500001526.mm.1 | 2,21 Rabgef1                 | JUC0500007559.mm.1 | -2,46 | 0,006181 | 0,387873 |                          |
| TC0500001526.mm.1 | 2,21 Rabgef1                 | PSR0500013789.mm.1 | -2,6  | 0,035069 | 0,527574 | Alternative 5' Donc 0,28 |
| TC1300002520.mm.1 | 3,58 Map1b                   | PSR1300016968.mm.1 | -2,16 | 0,037314 | 0,533573 | Cassette Exon 0,09       |
| TC1300002520.mm.1 | 3,58 Map1b                   | JUC1300009020.mm.1 | -2,42 | 0,002984 | 0,352501 |                          |
| TC1300002520.mm.1 | 3,58 Map1b                   | PSR1300016970.mm.1 | -3,18 | 0,039976 | 0,540992 | Alternative 5' Donc 0,23 |
| TC0900000752.mm.1 | 1,36 Gramd2; 493340718Rik    | PSR0900005615.mm.1 | -2,16 | 0,008687 | 0,408815 | Alternative 3' Acce 0,18 |
| TC0900000752.mm.1 | 1,36 Gramd2; 493340718Rik    | PSR0900005601.mm.1 | -2,27 | 0,035095 | 0,527591 | Alternative 3' Acce 0,2  |
| TC0900000752.mm.1 | 1,36 Gramd2; 493340718Rik    | JUC0900002983.mm.1 | -2,42 | 0,015322 | 0,453681 |                          |
| TC0100003021.mm.1 | -1,02 Zranb3                 | PSR0100024195.mm.1 | -2,16 | 0,024727 | 0,494838 | Alternative 3' Acce 0,19 |
| TC1500001152.mm.1 | -1,12 Card6                  | PSR1500009283.mm.1 | -2,16 | 0,024923 | 0,4958   | Alternative 5' Donc 0,18 |
| TC1500001646.mm.1 | 1,39 Kcnq3                   | PSR1500012357.mm.1 | -2,16 | 0,046252 | 0,556168 | Cassette Exon 0,07       |
| TC1500001646.mm.1 | 1,39 Kcnq3                   | PSR1500012362.mm.1 | -2,75 | 0,00161  | 0,332831 | Cassette Exon 0,15       |
| TC1800000750.mm.1 | 1,31                         | PSR1800005448.mm.1 | -2,16 | 0,042271 | 0,547092 | Alternative 5' Donc 0,14 |
| TC0300002355.mm.1 | 2,28 Chrn2                   | PSR0300018163.mm.1 | -2,16 | 0,000939 | 0,313363 | Cassette Exon 0,12       |
| TC0700002387.mm.1 | 1,42 Vmn1r90; Nlrp5-ps; Gm18 | PSR0700021103.mm.1 | -2,16 | 0,019045 | 0,471941 | Cassette Exon 0,11       |

|                   |                                |                    |       |          |          |                     |      |
|-------------------|--------------------------------|--------------------|-------|----------|----------|---------------------|------|
| TC0700002387.mm.1 | 1,42 Vmn1r90; Nlrp5-ps; Gm18   | PSR0700021109.mm.1 | -2,24 | 0,035008 | 0,527412 | Cassette Exon       | 0,12 |
| TC0700002387.mm.1 | 1,42 Vmn1r90; Nlrp5-ps; Gm18   | PSR0700021122.mm.1 | -2,36 | 0,011267 | 0,426793 | Cassette Exon       | 0,11 |
| TC1100000725.mm.1 | 1,54 4933439C10Rik             | PSR1100005782.mm.1 | -2,16 | 0,031577 | 0,517177 | Cassette Exon       | 0,12 |
| TC0300002493.mm.1 | 1,02 Vps45                     | PSR0300019471.mm.1 | -2,16 | 0,004967 | 0,373851 | Cassette Exon       | 0,11 |
| TC0900001349.mm.1 | 2,72 Pcbp4                     | PSR0900010521.mm.1 | -2,16 | 0,004962 | 0,373851 | Cassette Exon       | 0,11 |
| TC0900001349.mm.1 | 2,72 Pcbp4                     | JUC0900005796.mm.1 | -2,56 | 0,024244 | 0,493294 |                     |      |
| TC0900001349.mm.1 | 2,72 Pcbp4                     | JUC0900005786.mm.1 | -4,71 | 0,001528 | 0,330287 |                     |      |
| TC1300001096.mm.1 | 1,67 Gcnt4                     | PSR1300006964.mm.1 | -2,16 | 0,019019 | 0,471745 | Cassette Exon       | 0,11 |
| TC1400000720.mm.1 | 1,17 Trdj1; Trdj2; Trdc; A6300 | PSR1400005729.mm.1 | -2,16 | 0,016529 | 0,459611 | Cassette Exon       | 0,11 |
| TC1400000720.mm.1 | 1,17 Trdj1; Trdj2; Trdc; A6300 | JUC1400003089.mm.1 | -2,75 | 0,022514 | 0,487114 |                     |      |
| TC0700002179.mm.1 | 1,1 Sbk3; Gm1078               | PSR0700019920.mm.1 | -2,16 | 0,013023 | 0,439354 | Cassette Exon       | 0,1  |
| TC0300002453.mm.1 | 1 Cgn                          | PSR0300018846.mm.1 | -2,16 | 0,046302 | 0,556186 | Cassette Exon       | 0,07 |
| TC1200001875.mm.1 | 1,07 Cdkl1                     | JUC1200007077.mm.1 | -2,16 | 0,005479 | 0,379939 |                     |      |
| TC1100003804.mm.1 | 1,13 Ptges3l; Aarsd1; Gm2702   | JUC1100018429.mm.1 | -2,16 | 0,008605 | 0,40841  |                     |      |
| TC1100003804.mm.1 | 1,13 Ptges3l; Aarsd1; Gm2702   | JUC1100018417.mm.1 | -4,66 | 0,043004 | 0,54841  |                     |      |
| TC0200003601.mm.1 | 1,05 Ly75                      | JUC0200015575.mm.1 | -2,16 | 0,001269 | 0,322251 |                     |      |
| TC1300000650.mm.1 | -1,01 Fgfr4                    | JUC1300002196.mm.1 | -2,16 | 0,010189 | 0,419711 |                     |      |
| TC1900001390.mm.1 | 1,03 Sgms1                     | JUC1900006654.mm.1 | -2,16 | 0,005365 | 0,378627 |                     |      |
| TC0100000811.mm.1 | -1,15 Eif4e2                   | JUC0100003888.mm.1 | -2,16 | 0,011233 | 0,426718 |                     |      |
| TC1500001701.mm.1 | -1,03 Mroh5                    | JUC1500007298.mm.1 | -2,16 | 0,004946 | 0,373293 |                     |      |
| TC1500001701.mm.1 | -1,03 Mroh5                    | JUC1500007297.mm.1 | -2,64 | 0,01001  | 0,418602 |                     |      |
| TC1500000605.mm.1 | -1,52 Gpt                      | JUC1500002547.mm.1 | -2,16 | 0,007349 | 0,399281 |                     |      |
| TC1700000302.mm.1 | -1,22 Gm5493                   | JUC1700001185.mm.1 | -2,16 | 0,04016  | 0,541622 |                     |      |
| TC0100003481.mm.1 | -1,17                          | JUC0100016270.mm.1 | -2,16 | 0,038348 | 0,53622  |                     |      |
| TC0800000754.mm.1 | 1,1 Ell                        | JUC0800002831.mm.1 | -2,16 | 0,047548 | 0,558707 |                     |      |
| TC0800000754.mm.1 | 1,1 Ell                        | JUC0800002830.mm.1 | -2,67 | 0,016911 | 0,460797 |                     |      |
| TC0500000533.mm.1 | 1,02 Zcchc4                    | JUC0500002716.mm.1 | -2,16 | 0,014111 | 0,447137 |                     |      |
| TC0900000722.mm.1 | 1,07 Cyp11a1                   | JUC0900002810.mm.1 | -2,16 | 0,046032 | 0,555624 |                     |      |
| TC0600000551.mm.1 | 1,12 Krba1                     | JUC0600002034.mm.1 | -2,16 | 0,03307  | 0,521669 |                     |      |
| TC1000002719.mm.1 | 1,03                           | JUC1000011484.mm.1 | -2,16 | 0,025599 | 0,497821 |                     |      |
| TC1100002406.mm.1 | 1,44 Ccdc85a                   | JUC1100011739.mm.1 | -2,16 | 0,004937 | 0,373093 |                     |      |
| TC1100002406.mm.1 | 1,44 Ccdc85a                   | JUC1100011744.mm.1 | -2,32 | 0,010779 | 0,423955 |                     |      |
| TC1100002406.mm.1 | 1,44 Ccdc85a                   | JUC1100011734.mm.1 | -2,54 | 0,007458 | 0,400326 |                     |      |
| TC1100001834.mm.1 | 1,73 Prkar1a                   | JUC1100008996.mm.1 | -2,16 | 0,044414 | 0,551538 |                     |      |
| TC0400003448.mm.1 | 1,32 Smap2                     | JUC0400014595.mm.1 | -2,16 | 0,02945  | 0,510051 |                     |      |
| TC0900002421.mm.1 | 1,2 Senp8                      | JUC0900011459.mm.1 | -2,16 | 0,037542 | 0,534001 |                     |      |
| TC0900002036.mm.1 | -1,22 Chek1                    | JUC0900009535.mm.1 | -2,16 | 0,008596 | 0,408294 |                     |      |
| TC0900002036.mm.1 | -1,22 Chek1                    | JUC0900009527.mm.1 | -2,44 | 0,02938  | 0,509995 |                     |      |
| TC0400002457.mm.1 | 1,26 Nol6                      | JUC0400010297.mm.1 | -2,16 | 0,019381 | 0,473624 |                     |      |
| TC0500000814.mm.1 | 2,41 Rufy3                     | PSR0500007156.mm.1 | -2,17 | 0,002946 | 0,352501 | Cassette Exon       | 0,1  |
| TC0500000814.mm.1 | 2,41 Rufy3                     | PSR0500007150.mm.1 | -2,99 | 0,035579 | 0,528808 | Alternative 3' Acce | 0,25 |
| TC0500000814.mm.1 | 2,41 Rufy3                     | PSR0500007153.mm.1 | -3,79 | 0,003291 | 0,354243 | Intron Retention    | 0,69 |
| TC0500000814.mm.1 | 2,41 Rufy3                     | PSR0500007149.mm.1 | -4,34 | 0,005746 | 0,382993 | Cassette Exon       | 0,41 |
| TC0500000814.mm.1 | 2,41 Rufy3                     | JUC0500003917.mm.1 | -5,18 | 0,00693  | 0,395213 |                     |      |
| TC0700001818.mm.1 | 7,21 Fam57b                    | PSR0700015538.mm.1 | -2,17 | 0,01747  | 0,463886 | Cassette Exon       | 0,31 |
| TC0700001818.mm.1 | 7,21 Fam57b                    | JUC0700008145.mm.1 | -2,21 | 0,001557 | 0,331094 |                     |      |
| TC0700001818.mm.1 | 7,21 Fam57b                    | PSR0700015544.mm.1 | -2,74 | 0,005259 | 0,377945 | Cassette Exon       | 0,09 |
| TC0700001818.mm.1 | 7,21 Fam57b                    | PSR0700015536.mm.1 | -2,88 | 0,034762 | 0,52661  | Cassette Exon       | 0,31 |

|                   |                             |                    |        |          |                              |      |
|-------------------|-----------------------------|--------------------|--------|----------|------------------------------|------|
| TC0700001818.mm.1 | 7,21 Fam57b                 | PSR0700015537.mm.1 | -3,74  | 0,010029 | 0,41878 Cassette Exon        | 0,42 |
| TC0700001818.mm.1 | 7,21 Fam57b                 | JUC0700008142.mm.1 | -4,05  | 0,010499 | 0,422057                     |      |
| TC0700001818.mm.1 | 7,21 Fam57b                 | JUC0700008146.mm.1 | -5,46  | 0,030751 | 0,514082                     |      |
| TC0700001818.mm.1 | 7,21 Fam57b                 | PSR0700015546.mm.1 | -6,4   | 0,042008 | 0,546101 Alternative 3' Acce | 0,48 |
| TC0700001818.mm.1 | 7,21 Fam57b                 | JUC0700008139.mm.1 | -7,1   | 0,017303 | 0,463271                     |      |
| TC0700001818.mm.1 | 7,21 Fam57b                 | JUC0700008149.mm.1 | -7,24  | 0,017563 | 0,464258                     |      |
| TC0700001818.mm.1 | 7,21 Fam57b                 | JUC0700008140.mm.1 | -7,51  | 0,035964 | 0,529457                     |      |
| TC0700001818.mm.1 | 7,21 Fam57b                 | JUC0700008141.mm.1 | -7,66  | 0,022421 | 0,486764                     |      |
| TC0700001818.mm.1 | 7,21 Fam57b                 | PSR0700015540.mm.1 | -9,12  | 0,003728 | 0,357586 Cassette Exon       | 0,55 |
| TC1800000706.mm.1 | 2,37 Slmo1                  | PSR1800005176.mm.1 | -2,17  | 0,010691 | 0,423294 Intron Retention    | 0,29 |
| TC1800000706.mm.1 | 2,37 Slmo1                  | PSR1800005170.mm.1 | -2,18  | 0,00509  | 0,375607 Cassette Exon       | 0,17 |
| TC1800000706.mm.1 | 2,37 Slmo1                  | PSR1800005178.mm.1 | -2,63  | 0,009608 | 0,417256 Alternative 5' Donc | 0,3  |
| TC1800000706.mm.1 | 2,37 Slmo1                  | PSR1800005172.mm.1 | -2,85  | 0,018174 | 0,467441 Alternative 5' Donc | 0,29 |
| TC1800000706.mm.1 | 2,37 Slmo1                  | JUC1800002881.mm.1 | -2,92  | 0,025368 | 0,497403                     |      |
| TC1800000706.mm.1 | 2,37 Slmo1                  | PSR1800005174.mm.1 | -3,03  | 0,007688 | 0,402552 Intron Retention    | 0,51 |
| TC1000000593.mm.1 | 1,69 Rufy2                  | PSR1000004026.mm.1 | -2,17  | 0,012078 | 0,43255 Cassette Exon        | 0,11 |
| TC1000000593.mm.1 | 1,69 Rufy2                  | PSR1000004029.mm.1 | -2,33  | 0,048753 | 0,561437 Cassette Exon       | 0,12 |
| TC1000000593.mm.1 | 1,69 Rufy2                  | JUC1000002212.mm.1 | -2,76  | 0,019715 | 0,474887                     |      |
| TC1000000593.mm.1 | 1,69 Rufy2                  | PSR1000004063.mm.1 | -16,12 | 0,001055 | 0,316361 Alternative 5' Donc | 0,46 |
| TC1600000460.mm.1 | 1,41 Rpl35a; Gm14279; Gm102 | JUC1600002252.mm.1 | -2,17  | 0,031089 | 0,515208                     |      |
| TC1600000460.mm.1 | 1,41 Rpl35a; Gm14279; Gm102 | PSR1600004358.mm.1 | -2,53  | 0,018247 | 0,467836 Intron Retention    | 0,36 |
| TC1300001747.mm.1 | -1,21 1700018A04Rik         | PSR1300010870.mm.1 | -2,17  | 0,02618  | 0,50003 Cassette Exon        | 0,16 |
| TC1300001747.mm.1 | -1,21 1700018A04Rik         | PSR1300010864.mm.1 | -2,31  | 0,020514 | 0,478264 Intron Retention    | 0,32 |
| TC0600000527.mm.1 | 1,51 Cul1                   | PSR0600003920.mm.1 | -2,17  | 0,008927 | 0,410972 Cassette Exon       | 0,09 |
| TC0600000527.mm.1 | 1,51 Cul1                   | PSR0600003935.mm.1 | -2,21  | 0,020772 | 0,479328 Alternative 3' Acce | 0,13 |
| TC0600000527.mm.1 | 1,51 Cul1                   | JUC0600001963.mm.1 | -2,92  | 0,003342 | 0,354243                     |      |
| TC0600000527.mm.1 | 1,51 Cul1                   | PSR0600003892.mm.1 | -3,12  | 0,01777  | 0,465467 Alternative 3' Acce | 0,3  |
| TC0100002314.mm.1 | 1,94 Gls                    | PSR0100018644.mm.1 | -2,17  | 0,031303 | 0,516204 Alternative 5' Donc | 0,16 |
| TC0100002314.mm.1 | 1,94 Gls                    | PSR0100018661.mm.1 | -2,19  | 0,004678 | 0,370201 Cassette Exon       | 0,07 |
| TC0100002314.mm.1 | 1,94 Gls                    | PSR0100018640.mm.1 | -2,23  | 0,04495  | 0,55287 Alternative 5' Donc  | 0,15 |
| TC0100002314.mm.1 | 1,94 Gls                    | PSR0100018633.mm.1 | -2,27  | 0,040334 | 0,541859 Cassette Exon       | 0,08 |
| TC0100002314.mm.1 | 1,94 Gls                    | PSR0100018625.mm.1 | -2,29  | 0,014421 | 0,448786 Cassette Exon       | 0,14 |
| TC0100002314.mm.1 | 1,94 Gls                    | PSR0100018648.mm.1 | -2,6   | 0,017373 | 0,463612 Cassette Exon       | 0,28 |
| TC0100002314.mm.1 | 1,94 Gls                    | PSR0100018647.mm.1 | -2,84  | 0,017328 | 0,463416 Cassette Exon       | 0,15 |
| TC0100002314.mm.1 | 1,94 Gls                    | JUC0100010557.mm.1 | -4,02  | 0,017485 | 0,463964                     |      |
| TC1000000358.mm.1 | 1,42 Wasf1                  | PSR1000002389.mm.1 | -2,17  | 0,025572 | 0,497808 Cassette Exon       | 0,09 |
| TC1000000358.mm.1 | 1,42 Wasf1                  | PSR1000002401.mm.1 | -2,39  | 0,02851  | 0,507386 Alternative 5' Donc | 0,22 |
| TC1000000358.mm.1 | 1,42 Wasf1                  | PSR1000002384.mm.1 | -3,49  | 0,017229 | 0,462633 Alternative 3' Acce | 0,28 |
| TC0200004521.mm.1 | 2,19 Myef2; Gm9833          | PSR0200038431.mm.1 | -2,17  | 0,046439 | 0,556547 Cassette Exon       | 0,17 |
| TC0200004521.mm.1 | 2,19 Myef2; Gm9833          | JUC0200019828.mm.1 | -2,17  | 0,04614  | 0,555804                     |      |
| TC0200004521.mm.1 | 2,19 Myef2; Gm9833          | JUC0200019836.mm.1 | -2,44  | 0,038384 | 0,536356                     |      |
| TC0200004521.mm.1 | 2,19 Myef2; Gm9833          | JUC0200019837.mm.1 | -2,63  | 0,01389  | 0,445828                     |      |
| TC0200004521.mm.1 | 2,19 Myef2; Gm9833          | PSR0200038405.mm.1 | -3,53  | 0,013395 | 0,442454 Cassette Exon       | 0,25 |
| TC0200001628.mm.1 | 1,18 Ccdc34                 | PSR0200012190.mm.1 | -2,17  | 0,037188 | 0,533252 Alternative 5' Donc | 0,18 |
| TC0200001628.mm.1 | 1,18 Ccdc34                 | JUC0200006076.mm.1 | -2,29  | 0,024875 | 0,49558                      |      |
| TC1500000064.mm.1 | 2,23 Nadk2; Nadkd1          | PSR1500000588.mm.1 | -2,17  | 0,026967 | 0,502831 Cassette Exon       | 0,11 |
| TC1500000064.mm.1 | 2,23 Nadk2; Nadkd1          | PSR1500000595.mm.1 | -2,23  | 0,028695 | 0,508019 Cassette Exon       | 0,17 |
| TC1500000064.mm.1 | 2,23 Nadk2; Nadkd1          | JUC1500000389.mm.1 | -2,86  | 0,028525 | 0,507436                     |      |

|                   |                             |                    |       |          |                              |      |
|-------------------|-----------------------------|--------------------|-------|----------|------------------------------|------|
| TC1900000471.mm.1 | 1,67 Pten                   | PSR1900004281.mm.1 | -2,17 | 0,016432 | 0,459007 Alternative 3' Acce | 0,16 |
| TC1900000471.mm.1 | 1,67 Pten                   | PSR1900004291.mm.1 | -2,18 | 0,00396  | 0,359922 Alternative 3' Acce | 0,17 |
| TC0X00002481.mm.1 | 1,47 4933407K13Rik          | PSR0X00015878.mm.1 | -2,17 | 0,048857 | 0,561704 Alternative 5' Donc | 0,13 |
| TC0X00002481.mm.1 | 1,47 4933407K13Rik          | JUC0X00008084.mm.1 | -2,48 | 0,017778 | 0,465534                     |      |
| TC0X00002481.mm.1 | 1,47 4933407K13Rik          | PSR0X00015873.mm.1 | -2,56 | 0,003304 | 0,354243 Alternative 3' Acce | 0,13 |
| TC0X00002481.mm.1 | 1,47 4933407K13Rik          | PSR0X00015869.mm.1 | -2,66 | 0,012903 | 0,438213 Alternative 3' Acce | 0,09 |
| TC0400001708.mm.1 | -1,58 Hspg2                 | PSR0400013742.mm.1 | -2,17 | 0,001404 | 0,325997 Cassette Exon       | 0,12 |
| TC1600001022.mm.1 | 1,31                        | PSR1600008018.mm.1 | -2,17 | 0,004885 | 0,372195 Cassette Exon       | 0,11 |
| TC1600001022.mm.1 | 1,31                        | PSR1600008016.mm.1 | -2,26 | 0,029865 | 0,511132 Cassette Exon       | 0,12 |
| TC0200004844.mm.1 | 1,35 Vsx1                   | PSR0200041265.mm.1 | -2,17 | 0,009729 | 0,417839 Alternative 5' Donc | 0,11 |
| TC1200001474.mm.1 | 1,18                        | PSR1200010363.mm.1 | -2,17 | 0,006462 | 0,390372 Cassette Exon       | 0,11 |
| TC0700003996.mm.1 | -1,13 Gm4070; Gvin1; Gm1775 | PSR0700033364.mm.1 | -2,17 | 0,032949 | 0,52122 Alternative 3' Acce  | 0,09 |
| TC1400001702.mm.1 | 1,22 1700024G13Rik          | JUC1400007189.mm.1 | -2,17 | 0,039593 | 0,539903                     |      |
| TC0200003025.mm.1 | 1,12                        | JUC0200012632.mm.1 | -2,17 | 0,039956 | 0,540973                     |      |
| TC1400001805.mm.1 | -1,11 Gm3676                | JUC1400007557.mm.1 | -2,17 | 0,004231 | 0,363295                     |      |
| TC1400000363.mm.1 | 1,17 Gdf10                  | JUC1400001936.mm.1 | -2,17 | 0,00878  | 0,409822                     |      |
| TC0200005336.mm.1 | 1,19 Gm14442                | JUC0200023416.mm.1 | -2,17 | 0,010894 | 0,424403                     |      |
| TC0200005410.mm.1 | -1,2 B230312C02Rik          | JUC0200023758.mm.1 | -2,17 | 0,014483 | 0,449345                     |      |
| TC1200001770.mm.1 | 1,12 Ralgapa1; Gm23394      | JUC1200006788.mm.1 | -2,17 | 0,00201  | 0,341091                     |      |
| TC0100000608.mm.1 | 1,24 Smarcal1               | JUC0100002855.mm.1 | -2,17 | 0,048132 | 0,559938                     |      |
| TC0100000608.mm.1 | 1,24 Smarcal1               | JUC0100002857.mm.1 | -2,2  | 0,010768 | 0,423955                     |      |
| TC1800000977.mm.1 | 1,38 Esco1                  | JUC1800004021.mm.1 | -2,17 | 0,036834 | 0,532221                     |      |
| TC1800001151.mm.1 | -1,06 4933408B17Rik         | JUC1800004694.mm.1 | -2,17 | 0,033502 | 0,522992                     |      |
| TC1900000211.mm.1 | -1,17 Slc15a3               | JUC1900001381.mm.1 | -2,17 | 0,038258 | 0,535953                     |      |
| TC1500001782.mm.1 | 1,23 Cpsf1                  | JUC1500007824.mm.1 | -2,17 | 0,015369 | 0,453849                     |      |
| TC1600000038.mm.1 | 1,28 Mgrn1                  | JUC1600000158.mm.1 | -2,17 | 0,000249 | 0,28803                      |      |
| TC0200000550.mm.1 | -1,01 Hmcn2                 | JUC0200002322.mm.1 | -2,17 | 0,043488 | 0,549901                     |      |
| TC0200000550.mm.1 | -1,01 Hmcn2                 | JUC0200002314.mm.1 | -3,56 | 0,014866 | 0,451641                     |      |
| TC0800001107.mm.1 | 1,1                         | JUC0800004559.mm.1 | -2,17 | 0,040066 | 0,541386                     |      |
| TC0500002120.mm.1 | 1,08 Gm5862                 | JUC0500010528.mm.1 | -2,17 | 0,015314 | 0,453561                     |      |
| TC0800000854.mm.1 | 1,38 Nr3c2                  | JUC0800003354.mm.1 | -2,17 | 0,004305 | 0,364136                     |      |
| TC0900001600.mm.1 | 1,1 Myrip                   | JUC0900007543.mm.1 | -2,17 | 0,041128 | 0,543971                     |      |
| TC0500001342.mm.1 | 1,01 Ddx54                  | JUC0500006411.mm.1 | -2,17 | 0,001056 | 0,316361                     |      |
| TC0700003783.mm.1 | 1,52 2210018M11Rik          | JUC0700016873.mm.1 | -2,17 | 0,020327 | 0,477245                     |      |
| TC0700003783.mm.1 | 1,52 2210018M11Rik          | JUC0700016854.mm.1 | -2,26 | 0,013113 | 0,439759                     |      |
| TC0300002716.mm.1 | 1,5 Ahcyl1                  | JUC0300011027.mm.1 | -2,17 | 0,046603 | 0,556781                     |      |
| TC0X00003428.mm.1 | -1,32 Xlr5c                 | JUC0X00007615.mm.1 | -2,17 | 0,018085 | 0,46716                      |      |
| TC0200001204.mm.1 | 4,58 Fam171b                | JUC0200004934.mm.1 | -2,18 | 0,002631 | 0,349612                     |      |
| TC0200001204.mm.1 | 4,58 Fam171b                | PSR0200009647.mm.1 | -2,77 | 0,015477 | 0,45435 Cassette Exon        | 0,2  |
| TC0200001204.mm.1 | 4,58 Fam171b                | PSR0200009648.mm.1 | -3,41 | 0,006652 | 0,393165 Cassette Exon       | 0,23 |
| TC0200001204.mm.1 | 4,58 Fam171b                | PSR0200009651.mm.1 | -6,03 | 0,000769 | 0,308403 Alternative 3' Acce | 0,49 |
| TC0900001954.mm.1 | 6,57 Ntm                    | PSR0900016404.mm.1 | -2,18 | 0,044616 | 0,552129 Cassette Exon       | 0,24 |
| TC0900001954.mm.1 | 6,57 Ntm                    | PSR0900016412.mm.1 | -2,71 | 0,012685 | 0,436333 Alternative 3' Acce | 0,26 |
| TC0900001954.mm.1 | 6,57 Ntm                    | PSR0900016429.mm.1 | -3,3  | 0,026441 | 0,501198                     |      |
| TC0900001954.mm.1 | 6,57 Ntm                    | JUC0900009288.mm.1 | -3,65 | 0,021613 | 0,483425                     |      |
| TC0900001954.mm.1 | 6,57 Ntm                    | PSR0900016428.mm.1 | -3,94 | 0,037185 | 0,53323 Alternative 3' Acce  | 0,1  |
| TC0900001954.mm.1 | 6,57 Ntm                    | PSR0900016400.mm.1 | -3,98 | 0,03835  | 0,53622 Alternative 3' Acce  | 0,42 |
| TC0900001954.mm.1 | 6,57 Ntm                    | PSR0900016405.mm.1 | -4,02 | 0,025034 | 0,496091 Cassette Exon       | 0,37 |

|                   |                                |                    |       |          |                              |      |
|-------------------|--------------------------------|--------------------|-------|----------|------------------------------|------|
| TC0900001954.mm.1 | 6,57 Ntm                       | PSR0900016419.mm.1 | -4,08 | 0,009146 | 0,413447 Cassette Exon       | 0,41 |
| TC0900001954.mm.1 | 6,57 Ntm                       | PSR0900016420.mm.1 | -4,61 | 0,018067 | 0,46716 Alternative 3' Acce  | 0,35 |
| TC0900001954.mm.1 | 6,57 Ntm                       | PSR0900016427.mm.1 | -4,78 | 0,020204 | 0,477145 Cassette Exon       | 0,14 |
| TC0900001954.mm.1 | 6,57 Ntm                       | PSR0900016406.mm.1 | -5,05 | 0,008653 | 0,408463 Cassette Exon       | 0,24 |
| TC0900001954.mm.1 | 6,57 Ntm                       | PSR0900016417.mm.1 | -5,07 | 0,008059 | 0,40448 Cassette Exon        | 0,36 |
| TC0900001954.mm.1 | 6,57 Ntm                       | JUC0900009292.mm.1 | -5,11 | 0,047373 | 0,558302                     |      |
| TC0900001954.mm.1 | 6,57 Ntm                       | JUC0900009298.mm.1 | -5,58 | 0,008575 | 0,40821                      |      |
| TC0900001954.mm.1 | 6,57 Ntm                       | PSR0900016416.mm.1 | -5,99 | 0,012114 | 0,432704 Cassette Exon       | 0,24 |
| TC0900001954.mm.1 | 6,57 Ntm                       | PSR0900016433.mm.1 | -6,13 | 0,006973 | 0,395722 Alternative 5' Donc | 0,11 |
| TC0900001954.mm.1 | 6,57 Ntm                       | PSR0900016426.mm.1 | -6,78 | 0,017346 | 0,46353 Cassette Exon        | 0,28 |
| TC0900001954.mm.1 | 6,57 Ntm                       | JUC0900009296.mm.1 | -7,11 | 0,009985 | 0,418456                     |      |
| TC0900001954.mm.1 | 6,57 Ntm                       | PSR0900016407.mm.1 | -7,53 | 0,009501 | 0,416578 Alternative 3' Acce | 0,46 |
| TC0100000682.mm.1 | 2,02 Utp14b; Acsl3             | PSR0100005849.mm.1 | -2,18 | 0,042742 | 0,548097 Cassette Exon       | 0,08 |
| TC0100000682.mm.1 | 2,02 Utp14b; Acsl3             | PSR0100005860.mm.1 | -2,18 | 0,008925 | 0,410972 Cassette Exon       | 0,07 |
| TC0100000682.mm.1 | 2,02 Utp14b; Acsl3             | PSR0100005869.mm.1 | -3,7  | 0,014551 | 0,44963 Alternative 5' Donc  | 0,44 |
| TC1700000064.mm.1 | -1,13 Sytl3; LOC101055745; LOC | PSR1700000453.mm.1 | -2,18 | 0,021354 | 0,48184 Intron Retention     | 0,29 |
| TC0400004009.mm.1 | 1,69 Clcn6                     | PSR0400033140.mm.1 | -2,18 | 0,037943 | 0,535302 Cassette Exon       | 0,11 |
| TC0400004009.mm.1 | 1,69 Clcn6                     | PSR0400033134.mm.1 | -3,27 | 0,009592 | 0,417183 Cassette Exon       | 0,27 |
| TC0600003475.mm.1 | 1,84 Dennd5b                   | PSR0600027502.mm.1 | -2,18 | 0,011384 | 0,427549 Alternative 3' Acce | 0,24 |
| TC0600003475.mm.1 | 1,84 Dennd5b                   | PSR0600027520.mm.1 | -2,38 | 0,009635 | 0,417354 Alternative 5' Donc | 0,18 |
| TC0600003475.mm.1 | 1,84 Dennd5b                   | JUC0600014450.mm.1 | -2,67 | 0,038306 | 0,536106                     |      |
| TC0600003475.mm.1 | 1,84 Dennd5b                   | PSR0600027505.mm.1 | -2,8  | 0,002771 | 0,350656 Alternative 5' Donc | 0,26 |
| TC0600003475.mm.1 | 1,84 Dennd5b                   | PSR0600027501.mm.1 | -2,86 | 0,034341 | 0,525546 Alternative 3' Acce | 0,24 |
| TC0600003475.mm.1 | 1,84 Dennd5b                   | JUC0600014432.mm.1 | -3,2  | 0,02232  | 0,486213                     |      |
| TC0900002802.mm.1 | 2,14 9430037G07Rik; Gm2301     | JUC0900013035.mm.1 | -2,18 | 0,028191 | 0,506368                     |      |
| TC0900002802.mm.1 | 2,14 9430037G07Rik; Gm2301     | JUC0900013033.mm.1 | -2,4  | 0,016769 | 0,460504                     |      |
| TC0900002802.mm.1 | 2,14 9430037G07Rik; Gm2301     | PSR0900023286.mm.1 | -3,14 | 0,013283 | 0,441719 Cassette Exon       | 0,25 |
| TC1600000193.mm.1 | 1,1 Pkp2                       | PSR1600001504.mm.1 | -2,18 | 0,000911 | 0,313363 Cassette Exon       | 0,13 |
| TC1600000193.mm.1 | 1,1 Pkp2                       | PSR1600001494.mm.1 | -2,77 | 0,030027 | 0,511736 Alternative 5' Donc | 0,23 |
| TC0400002016.mm.1 | 2,26 Acot7                     | PSR0400016507.mm.1 | -2,18 | 0,024484 | 0,493992 Cassette Exon       | 0,15 |
| TC0400002016.mm.1 | 2,26 Acot7                     | PSR0400016510.mm.1 | -2,2  | 0,028578 | 0,507603 Cassette Exon       | 0,11 |
| TC0400002016.mm.1 | 2,26 Acot7                     | PSR0400016515.mm.1 | -2,74 | 0,02646  | 0,501252                     |      |
| TC0400002016.mm.1 | 2,26 Acot7                     | PSR0400016511.mm.1 | -2,94 | 0,005852 | 0,383738 Alternative 3' Acce | 0,21 |
| TC0400002016.mm.1 | 2,26 Acot7                     | PSR0400016509.mm.1 | -3,02 | 0,01486  | 0,451623 Cassette Exon       | 0,19 |
| TC0400002016.mm.1 | 2,26 Acot7                     | PSR0400016513.mm.1 | -3,6  | 0,017114 | 0,46232 Alternative 3' Acce  | 0,14 |
| TC0400002016.mm.1 | 2,26 Acot7                     | PSR0400016516.mm.1 | -3,82 | 0,006728 | 0,393343 Alternative 5' Donc | 0,13 |
| TC0600000627.mm.1 | 1,11 Evx1                      | PSR0600004808.mm.1 | -2,18 | 0,022594 | 0,487325 Alternative 5' Donc | 0,2  |
| TC1100001250.mm.1 | 2,51 Rasl10b                   | PSR1100011750.mm.1 | -2,18 | 0,008487 | 0,406895 Cassette Exon       | 0,17 |
| TC1100001250.mm.1 | 2,51 Rasl10b                   | PSR1100011745.mm.1 | -2,52 | 0,029843 | 0,511132 Cassette Exon       | 0,11 |
| TC1100001250.mm.1 | 2,51 Rasl10b                   | PSR1100011743.mm.1 | -2,68 | 0,007778 | 0,402902 Cassette Exon       | 0,16 |
| TC1100001250.mm.1 | 2,51 Rasl10b                   | PSR1100011744.mm.1 | -2,75 | 0,013459 | 0,442805 Cassette Exon       | 0,19 |
| TC1100001250.mm.1 | 2,51 Rasl10b                   | PSR1100011746.mm.1 | -3,01 | 0,001374 | 0,32572 Cassette Exon        | 0,14 |
| TC1100001250.mm.1 | 2,51 Rasl10b                   | JUC1100006148.mm.1 | -4,47 | 0,003335 | 0,354243                     |      |
| TC1400002493.mm.1 | -1,26 Lect1                    | PSR1400019165.mm.1 | -2,18 | 0,041651 | 0,545299 Alternative 3' Acce | 0,19 |
| TC0500002037.mm.1 | 1,01 Orc5; Gm15421             | PSR0500018559.mm.1 | -2,18 | 0,027763 | 0,505135 Alternative 3' Acce | 0,17 |
| TC0700000903.mm.1 | 1,12 Htatip2                   | PSR0700008127.mm.1 | -2,18 | 0,037427 | 0,533831 Alternative 3' Acce | 0,17 |
| TC0500003746.mm.1 | 1,37 1810059H22Rik             | PSR0500033484.mm.1 | -2,18 | 0,014783 | 0,45081 Cassette Exon        | 0,15 |
| TC1100000918.mm.1 | 1,7 Fxr2                       | PSR1100007793.mm.1 | -2,18 | 0,042009 | 0,546101 Alternative 3' Acce | 0,15 |

|                   |                      |                    |       |          |                              |      |
|-------------------|----------------------|--------------------|-------|----------|------------------------------|------|
| TC1500001108.mm.1 | 1,67 Gm4544          | PSR1500008943.mm.1 | -2,18 | 0,026857 | 0,502454 Alternative 3' Acce | 0,13 |
| TC0800002733.mm.1 | 1,26 1700121C10Rik   | PSR0800020935.mm.1 | -2,18 | 0,032983 | 0,521351 Cassette Exon       | 0,12 |
| TC1900000024.mm.1 | 1,21 Doc2g; Nudt8    | PSR1900000278.mm.1 | -2,18 | 0,001429 | 0,327447 Alternative 3' Acce | 0,12 |
| TC0600000667.mm.1 | 1,13 Adcyap1r1       | PSR0600005174.mm.1 | -2,18 | 0,002566 | 0,349501 Cassette Exon       | 0,11 |
| TC1100003144.mm.1 | -1,28 Smtnl2         | PSR1100029155.mm.1 | -2,18 | 0,038432 | 0,536405 Cassette Exon       | 0,11 |
| TC0700000567.mm.1 | 1,47 Igflr1; U2af1l4 | PSR0700005070.mm.1 | -2,18 | 0,04795  | 0,559549 Cassette Exon       | 0,1  |
| TC1500001987.mm.1 | 1,76 1810041L15Rik   | PSR1500015781.mm.1 | -2,18 | 0,025394 | 0,497403 Cassette Exon       | 0,09 |
| TC0100003057.mm.1 | -1,08 lkbke          | PSR0100024515.mm.1 | -2,18 | 0,045925 | 0,555257 Cassette Exon       | 0,08 |
| TC1400002242.mm.1 | 1,06 Hmbox1          | JUC1400009484.mm.1 | -2,18 | 0,006121 | 0,387322                     |      |
| TC1200000874.mm.1 | 1,12 Samd15          | JUC1200003610.mm.1 | -2,18 | 0,047288 | 0,558242                     |      |
| TC0200005411.mm.1 | -1,1                 | JUC0200023764.mm.1 | -2,18 | 0,02089  | 0,479646                     |      |
| TC0100002306.mm.1 | -1,02 Gm17767        | JUC0100010492.mm.1 | -2,18 | 0,037255 | 0,53345                      |      |
| TC1700001783.mm.1 | -1,01 Mtch1          | JUC1700008873.mm.1 | -2,18 | 0,032922 | 0,521149                     |      |
| TC1700001783.mm.1 | -1,01 Mtch1          | JUC1700008875.mm.1 | -2,91 | 0,011474 | 0,428022                     |      |
| TC0100001109.mm.1 | 1,62                 | JUC0100005210.mm.1 | -2,18 | 0,032953 | 0,52122                      |      |
| TC1800001153.mm.1 | 1,93 Brd8            | JUC1800004720.mm.1 | -2,18 | 0,047363 | 0,558302                     |      |
| TC0200001982.mm.1 | 1,33 Vps16           | JUC0200007916.mm.1 | -2,18 | 0,033684 | 0,523549                     |      |
| TC0200001982.mm.1 | 1,33 Vps16           | JUC0200007903.mm.1 | -2,2  | 0,048555 | 0,561008                     |      |
| TC0200001982.mm.1 | 1,33 Vps16           | JUC0200007920.mm.1 | -2,58 | 0,035619 | 0,528956                     |      |
| TC1600002141.mm.1 | 1,03 Lca5l           | JUC1600008518.mm.1 | -2,18 | 0,004224 | 0,363295                     |      |
| TC0900000865.mm.1 | -1,24 Dapk2          | JUC0900003573.mm.1 | -2,18 | 0,016898 | 0,460797                     |      |
| TC0600003001.mm.1 | 1,37 Zfp248          | JUC0600011995.mm.1 | -2,18 | 0,021858 | 0,484635                     |      |
| TC0600003001.mm.1 | 1,37 Zfp248          | JUC0600011988.mm.1 | -2,2  | 0,044467 | 0,551693                     |      |
| TC0600003001.mm.1 | 1,37 Zfp248          | JUC0600011996.mm.1 | -2,23 | 0,018818 | 0,470836                     |      |
| TC0500003603.mm.1 | -1,09 Gm5565         | JUC0500018009.mm.1 | -2,18 | 0,000569 | 0,304044                     |      |
| TC0700001557.mm.1 | 1,42 Ilk             | JUC0700006749.mm.1 | -2,18 | 0,025834 | 0,498598                     |      |
| TC1000002240.mm.1 | -1,15 Adamts14       | JUC1000008624.mm.1 | -2,18 | 0,037733 | 0,534632                     |      |
| TC1000002252.mm.1 | 2,2 2010107G23Rik    | JUC1000008747.mm.1 | -2,18 | 0,005739 | 0,382993                     |      |
| TC0X00002751.mm.1 | 1,22 Phka1           | JUC0X00008781.mm.1 | -2,18 | 0,041121 | 0,543958                     |      |
| TC0400004218.mm.1 | 8,47 Ccdc24; Gm17114 | PSR0400027115.mm.1 | -2,19 | 0,003784 | 0,357586 Intron Retention    | 0,25 |
| TC0400004218.mm.1 | 8,47 Ccdc24; Gm17114 | JUC0400014106.mm.1 | -2,2  | 0,00021  | 0,28803                      |      |
| TC0400004218.mm.1 | 8,47 Ccdc24; Gm17114 | PSR0400027129.mm.1 | -2,63 | 0,032103 | 0,518577 Cassette Exon       | 0,29 |
| TC0400004218.mm.1 | 8,47 Ccdc24; Gm17114 | PSR0400027111.mm.1 | -3,58 | 0,005376 | 0,378747 Alternative 3' Acce | 0,45 |
| TC0400004218.mm.1 | 8,47 Ccdc24; Gm17114 | PSR0400027133.mm.1 | -3,67 | 0,026452 | 0,501251 Cassette Exon       | 0,28 |
| TC0400004218.mm.1 | 8,47 Ccdc24; Gm17114 | JUC0400014103.mm.1 | -3,72 | 0,031422 | 0,51654                      |      |
| TC0400004218.mm.1 | 8,47 Ccdc24; Gm17114 | PSR0400027109.mm.1 | -5,08 | 0,012502 | 0,435429 Alternative 3' Acce | 0,45 |
| TC0400004218.mm.1 | 8,47 Ccdc24; Gm17114 | PSR0400027127.mm.1 | -5,6  | 0,033033 | 0,521499 Alternative 5' Donc | 0,16 |
| TC0400004218.mm.1 | 8,47 Ccdc24; Gm17114 | PSR0400027104.mm.1 | -5,68 | 0,047298 | 0,558249 Alternative 3' Acce | 0,45 |
| TC0400004218.mm.1 | 8,47 Ccdc24; Gm17114 | JUC0400014118.mm.1 | -6,28 | 0,002291 | 0,346076                     |      |
| TC0400004218.mm.1 | 8,47 Ccdc24; Gm17114 | PSR0400027130.mm.1 | -6,32 | 0,028476 | 0,507299 Cassette Exon       | 0,29 |
| TC0400004218.mm.1 | 8,47 Ccdc24; Gm17114 | JUC0400014120.mm.1 | -6,66 | 0,021628 | 0,483548                     |      |
| TC0400004218.mm.1 | 8,47 Ccdc24; Gm17114 | PSR0400027101.mm.1 | -8,66 | 0,022482 | 0,487114 Cassette Exon       | 0,4  |
| TC0400004218.mm.1 | 8,47 Ccdc24; Gm17114 | JUC0400014109.mm.1 | -8,89 | 0,028558 | 0,507497                     |      |
| TC0400004218.mm.1 | 8,47 Ccdc24; Gm17114 | PSR0400027134.mm.1 | -9,39 | 0,008002 | 0,403872 Cassette Exon       | 0,24 |
| TC0400004218.mm.1 | 8,47 Ccdc24; Gm17114 | PSR0400027131.mm.1 | -9,59 | 0,00349  | 0,355638 Cassette Exon       | 0,29 |
| TC0400004218.mm.1 | 8,47 Ccdc24; Gm17114 | JUC0400014110.mm.1 | -10,1 | 0,029946 | 0,511499                     |      |
| TC0100003042.mm.1 | 4,1 Pfkfb2; C4bp-ps1 | PSR0100024408.mm.1 | -2,19 | 0,045636 | 0,554672                     |      |
| TC0100003042.mm.1 | 4,1 Pfkfb2; C4bp-ps1 | PSR0100024404.mm.1 | -2,41 | 0,013131 | 0,440038 Cassette Exon       | 0,13 |

|                   |                       |                    |       |          |                              |      |
|-------------------|-----------------------|--------------------|-------|----------|------------------------------|------|
| TC0100003042.mm.1 | 4,1 Pfkfb2; C4bp-ps1  | PSR0100024409.mm.1 | -2,73 | 0,037384 | 0,533687 Alternative 3' Acce | 0,07 |
| TC0100003042.mm.1 | 4,1 Pfkfb2; C4bp-ps1  | JUC0100013854.mm.1 | -3,22 | 0,03266  | 0,520431                     |      |
| TC0100003042.mm.1 | 4,1 Pfkfb2; C4bp-ps1  | PSR0100024394.mm.1 | -3,41 | 0,035515 | 0,528764 Cassette Exon       | 0,22 |
| TC0100003042.mm.1 | 4,1 Pfkfb2; C4bp-ps1  | PSR0100024398.mm.1 | -3,54 | 0,006297 | 0,389033 Cassette Exon       | 0,26 |
| TC0100003042.mm.1 | 4,1 Pfkfb2; C4bp-ps1  | PSR0100024429.mm.1 | -3,7  | 0,011752 | 0,430017 Alternative 5' Donc | 0,41 |
| TC0100003042.mm.1 | 4,1 Pfkfb2; C4bp-ps1  | PSR0100024395.mm.1 | -3,8  | 0,01679  | 0,460623 Cassette Exon       | 0,22 |
| TC0100003042.mm.1 | 4,1 Pfkfb2; C4bp-ps1  | JUC0100013851.mm.1 | -3,9  | 0,02726  | 0,503682                     |      |
| TC0100003042.mm.1 | 4,1 Pfkfb2; C4bp-ps1  | PSR0100024430.mm.1 | -4,02 | 0,008392 | 0,406601 Cassette Exon       | 0,41 |
| TC0100003042.mm.1 | 4,1 Pfkfb2; C4bp-ps1  | JUC0100013842.mm.1 | -4,52 | 0,003024 | 0,353502                     |      |
| TC0100003042.mm.1 | 4,1 Pfkfb2; C4bp-ps1  | JUC0100013833.mm.1 | -4,65 | 0,03037  | 0,512923                     |      |
| TC0100003042.mm.1 | 4,1 Pfkfb2; C4bp-ps1  | PSR0100024399.mm.1 | -4,94 | 0,014257 | 0,447947 Cassette Exon       | 0,26 |
| TC0100003042.mm.1 | 4,1 Pfkfb2; C4bp-ps1  | PSR0100024431.mm.1 | -4,97 | 0,020591 | 0,478531 Cassette Exon       | 0,28 |
| TC0100003042.mm.1 | 4,1 Pfkfb2; C4bp-ps1  | PSR0100024425.mm.1 | -5,09 | 0,04696  | 0,557563                     |      |
| TC0500000997.mm.1 | 2,4 Arhgap24          | JUC0500004619.mm.1 | -2,19 | 0,037874 | 0,534908                     |      |
| TC0500000997.mm.1 | 2,4 Arhgap24          | PSR0500008437.mm.1 | -2,22 | 0,000283 | 0,28803 Alternative 5' Donc  | 0,19 |
| TC0500000997.mm.1 | 2,4 Arhgap24          | PSR0500008417.mm.1 | -2,35 | 0,021983 | 0,485125 Cassette Exon       | 0,01 |
| TC0500000997.mm.1 | 2,4 Arhgap24          | PSR0500008429.mm.1 | -2,37 | 0,000443 | 0,297771 Cassette Exon       | 0,12 |
| TC0500000997.mm.1 | 2,4 Arhgap24          | PSR0500008422.mm.1 | -2,64 | 0,013847 | 0,445385 Cassette Exon       | 0,14 |
| TC0500000997.mm.1 | 2,4 Arhgap24          | PSR0500008426.mm.1 | -2,67 | 0,002309 | 0,346468 Cassette Exon       | 0,24 |
| TC0500000997.mm.1 | 2,4 Arhgap24          | PSR0500008419.mm.1 | -2,78 | 0,002791 | 0,351449                     |      |
| TC0500000997.mm.1 | 2,4 Arhgap24          | JUC0500004609.mm.1 | -2,87 | 0,005366 | 0,378627                     |      |
| TC0500000997.mm.1 | 2,4 Arhgap24          | PSR0500008425.mm.1 | -2,94 | 0,000875 | 0,311909 Cassette Exon       | 0,03 |
| TC0500000997.mm.1 | 2,4 Arhgap24          | PSR0500008415.mm.1 | -3,08 | 0,000042 | 0,24627 Alternative 3' Acce  | 0,12 |
| TC0500000997.mm.1 | 2,4 Arhgap24          | JUC0500004612.mm.1 | -3,14 | 0,012303 | 0,434371                     |      |
| TC0500000997.mm.1 | 2,4 Arhgap24          | JUC0500004623.mm.1 | -3,2  | 0,042447 | 0,547627                     |      |
| TC0500000997.mm.1 | 2,4 Arhgap24          | PSR0500008414.mm.1 | -3,73 | 0,000259 | 0,28803 Cassette Exon        | 0,34 |
| TC0500000997.mm.1 | 2,4 Arhgap24          | JUC0500004620.mm.1 | -3,89 | 0,010239 | 0,420146                     |      |
| TC0500000997.mm.1 | 2,4 Arhgap24          | PSR0500008423.mm.1 | -4,76 | 0,011725 | 0,429969 Alternative 3' Acce | 0,17 |
| TC0500000997.mm.1 | 2,4 Arhgap24          | JUC0500004621.mm.1 | -6,89 | 0,002673 | 0,349612                     |      |
| TC1000000693.mm.1 | 1,64 Zwint            | PSR1000004828.mm.1 | -2,19 | 0,036626 | 0,53155 Intron Retention     | 0,3  |
| TC1000000693.mm.1 | 1,64 Zwint            | PSR1000004838.mm.1 | -2,66 | 0,016796 | 0,460623 Alternative 3' Acce | 0,22 |
| TC1000000693.mm.1 | 1,64 Zwint            | JUC1000002616.mm.1 | -2,72 | 0,027429 | 0,503961                     |      |
| TC1000000693.mm.1 | 1,64 Zwint            | PSR1000004837.mm.1 | -3,84 | 0,001141 | 0,317344 Alternative 3' Acce | 0,22 |
| TC1000000693.mm.1 | 1,64 Zwint            | JUC1000002615.mm.1 | -5,4  | 0,037554 | 0,534053                     |      |
| TC1100003990.mm.1 | 2,81 Slc16a6; Gm25540 | PSR1100037341.mm.1 | -2,19 | 0,013551 | 0,443358                     |      |
| TC1100003990.mm.1 | 2,81 Slc16a6; Gm25540 | JUC1100019501.mm.1 | -2,26 | 0,008385 | 0,4065                       |      |
| TC1100003990.mm.1 | 2,81 Slc16a6; Gm25540 | PSR1100037339.mm.1 | -2,45 | 0,007888 | 0,403771                     |      |
| TC1100003990.mm.1 | 2,81 Slc16a6; Gm25540 | PSR1100037343.mm.1 | -2,54 | 0,022092 | 0,485453 Cassette Exon       | 0,3  |
| TC1100003990.mm.1 | 2,81 Slc16a6; Gm25540 | PSR1100037340.mm.1 | -2,6  | 0,009412 | 0,415853                     |      |
| TC1100003990.mm.1 | 2,81 Slc16a6; Gm25540 | JUC1100019504.mm.1 | -2,97 | 0,025107 | 0,496358                     |      |
| TC1100003990.mm.1 | 2,81 Slc16a6; Gm25540 | JUC1100019509.mm.1 | -4,09 | 0,003514 | 0,355749                     |      |
| TC0800001875.mm.1 | 2,62 Ap3m2            | JUC0800008092.mm.1 | -2,19 | 0,01335  | 0,442045                     |      |
| TC0800001875.mm.1 | 2,62 Ap3m2            | JUC0800008098.mm.1 | -2,29 | 0,000793 | 0,310881                     |      |
| TC0800001875.mm.1 | 2,62 Ap3m2            | PSR0800014874.mm.1 | -3,35 | 0,004293 | 0,364023 Cassette Exon       | 0,28 |
| TC1400002868.mm.1 | 1,6 Lats2             | PSR1400016564.mm.1 | -2,19 | 0,01216  | 0,432923 Cassette Exon       | 0,08 |
| TC1400002868.mm.1 | 1,6 Lats2             | PSR1400016577.mm.1 | -3,58 | 0,029947 | 0,511499 Cassette Exon       | 0,28 |
| TC0800002802.mm.1 | 1,17 Dync1li2         | PSR0800021425.mm.1 | -2,19 | 0,028592 | 0,507685 Cassette Exon       | 0,27 |
| TC0800002802.mm.1 | 1,17 Dync1li2         | JUC0800011693.mm.1 | -5,34 | 0,010219 | 0,419955                     |      |

|                   |                               |                    |       |          |                              |      |
|-------------------|-------------------------------|--------------------|-------|----------|------------------------------|------|
| TC0X00000709.mm.1 | 2,22 Gdi1                     | PSR0X00004823.mm.1 | -2,19 | 0,01684  | 0,460729 Cassette Exon       | 0,17 |
| TC0X00000709.mm.1 | 2,22 Gdi1                     | PSR0X00004826.mm.1 | -2,32 | 0,018018 | 0,466939 Alternative 5' Donc | 0,21 |
| TC0X00000709.mm.1 | 2,22 Gdi1                     | PSR0X00004816.mm.1 | -2,33 | 0,012712 | 0,436515 Alternative 3' Acce | 0,16 |
| TC0X00000709.mm.1 | 2,22 Gdi1                     | JUC0X00002426.mm.1 | -2,89 | 0,045663 | 0,55477                      |      |
| TC0X00000709.mm.1 | 2,22 Gdi1                     | PSR0X00004822.mm.1 | -2,97 | 0,004336 | 0,364898 Cassette Exon       | 0,2  |
| TC0700004474.mm.1 | 2,06 Bnip3                    | PSR0700037521.mm.1 | -2,19 | 0,012012 | 0,432286 Alternative 3' Acce | 0,07 |
| TC0700004474.mm.1 | 2,06 Bnip3                    | JUC0700019768.mm.1 | -2,23 | 0,017758 | 0,465425                     |      |
| TC0700004474.mm.1 | 2,06 Bnip3                    | PSR0700037513.mm.1 | -2,24 | 0,0262   | 0,50003 Alternative 3' Acce  | 0,2  |
| TC0200003140.mm.1 | 1,29 Ndor1                    | PSR0200025823.mm.1 | -2,19 | 0,04613  | 0,555804 Alternative 3' Acce | 0,19 |
| TC0200005127.mm.1 | -1,1 Wfdc3; LOC101055924      | PSR0200043714.mm.1 | -2,19 | 0,000537 | 0,304044 Alternative 3' Acce | 0,19 |
| TC1800001741.mm.1 | 1,05 Pcdhgb1; Pcdhgb2; Pcdhgt | JUC1800001604.mm.1 | -2,19 | 0,013826 | 0,445196                     |      |
| TC1800001741.mm.1 | 1,05 Pcdhgb1; Pcdhgb2; Pcdhgt | JUC1800001592.mm.1 | -2,26 | 0,007561 | 0,401384                     |      |
| TC1800001741.mm.1 | 1,05 Pcdhgb1; Pcdhgb2; Pcdhgt | JUC1800001587.mm.1 | -2,32 | 0,011946 | 0,431753                     |      |
| TC1800001741.mm.1 | 1,05 Pcdhgb1; Pcdhgb2; Pcdhgt | JUC1800001603.mm.1 | -2,42 | 0,017663 | 0,464653                     |      |
| TC1800001741.mm.1 | 1,05 Pcdhgb1; Pcdhgb2; Pcdhgt | JUC1800001605.mm.1 | -2,42 | 0,024244 | 0,493294                     |      |
| TC1800001741.mm.1 | 1,05 Pcdhgb1; Pcdhgb2; Pcdhgt | JUC1800001595.mm.1 | -2,56 | 0,000892 | 0,313363                     |      |
| TC1800001741.mm.1 | 1,05 Pcdhgb1; Pcdhgb2; Pcdhgt | PSR1800002760.mm.1 | -2,58 | 0,049946 | 0,563958 Cassette Exon       | 0,19 |
| TC1800000599.mm.1 | -1,23 Chsy3                   | PSR1800004284.mm.1 | -2,19 | 0,038594 | 0,536862 Alternative 5' Donc | 0,19 |
| TC1800000599.mm.1 | -1,23 Chsy3                   | JUC1800002402.mm.1 | -2,21 | 0,042578 | 0,548047                     |      |
| TC0400003266.mm.1 | 2,12 Gm12750                  | PSR0400025992.mm.1 | -2,19 | 0,048001 | 0,559574 Alternative 3' Acce | 0,17 |
| TC0100000021.mm.1 | -1,01 Rb1cc1                  | PSR0100000159.mm.1 | -2,19 | 0,015638 | 0,455193 Alternative 5' Donc | 0,13 |
| TC0100003827.mm.1 | -1,09 Hhat                    | JUC0100017753.mm.1 | -2,19 | 0,030972 | 0,514659                     |      |
| TC0100003827.mm.1 | -1,09 Hhat                    | PSR0100031294.mm.1 | -2,27 | 0,021056 | 0,480262 Cassette Exon       | 0,12 |
| TC0700003680.mm.1 | -1,48 Vmn2r74                 | PSR0700031191.mm.1 | -2,19 | 0,04076  | 0,543082 Cassette Exon       | 0,12 |
| TC0500003203.mm.1 | 1,23 Ccdc63                   | PSR0500028617.mm.1 | -2,19 | 0,005571 | 0,381015 Cassette Exon       | 0,11 |
| TC0500003241.mm.1 | 1,43 Rsrc2                    | PSR0500029188.mm.1 | -2,19 | 0,005483 | 0,379939 Cassette Exon       | 0,11 |
| TC0500003241.mm.1 | 1,43 Rsrc2                    | JUC0500015900.mm.1 | -2,75 | 0,0441   | 0,550916                     |      |
| TC0800003240.mm.1 | 1,63 6820431F20Rik; 2610005I  | PSR0800014451.mm.1 | -2,19 | 0,040935 | 0,543423 Cassette Exon       | 0,11 |
| TC0800003240.mm.1 | 1,63 6820431F20Rik; 2610005I  | JUC0800007880.mm.1 | -4,07 | 0,031829 | 0,517841                     |      |
| TC0900001168.mm.1 | -1,01 Plscr5                  | PSR0900009186.mm.1 | -2,19 | 0,004154 | 0,3623 Cassette Exon         | 0,11 |
| TC0X00000643.mm.1 | 2,61 Mamld1                   | PSR0X00003968.mm.1 | -2,19 | 0,017562 | 0,464258 Cassette Exon       | 0,11 |
| TC1400002142.mm.1 | 1,07 Cryl1                    | JUC1400008987.mm.1 | -2,19 | 0,038997 | 0,537976                     |      |
| TC1400002142.mm.1 | 1,07 Cryl1                    | JUC1400008988.mm.1 | -2,37 | 0,020676 | 0,478885                     |      |
| TC0300003213.mm.1 | 1,33 Clk2                     | JUC0300002941.mm.1 | -2,19 | 0,003275 | 0,354243                     |      |
| TC1200002088.mm.1 | 1,05 Rps6kl1                  | JUC1200007961.mm.1 | -2,19 | 0,019985 | 0,476227                     |      |
| TC1100004067.mm.1 | 1,01 Hid1                     | JUC1100020041.mm.1 | -2,19 | 0,044516 | 0,551823                     |      |
| TC1200000462.mm.1 | 1,42 Srp54c                   | JUC1200001796.mm.1 | -2,19 | 0,042612 | 0,548065                     |      |
| TC1200000462.mm.1 | 1,42 Srp54c                   | JUC1200001799.mm.1 | -3,08 | 0,047416 | 0,558302                     |      |
| TC0200001038.mm.1 | 1,45 Metap1d                  | JUC0200004316.mm.1 | -2,19 | 0,001001 | 0,316361                     |      |
| TC0200001038.mm.1 | 1,45 Metap1d                  | JUC0200004309.mm.1 | -2,57 | 0,017003 | 0,461566                     |      |
| TC0200000416.mm.1 | 1,08 Fut7                     | JUC0200001112.mm.1 | -2,19 | 0,034269 | 0,525304                     |      |
| TC0500000709.mm.1 | -1,22 Pdgfra; Mir7025; mmu-mi | JUC0500003450.mm.1 | -2,19 | 0,021333 | 0,481727                     |      |
| TC0600001441.mm.1 | -1,11 Zfp384                  | JUC0600006135.mm.1 | -2,19 | 0,041192 | 0,544121                     |      |
| TC0700001702.mm.1 | 1,32 9030624J02Rik            | JUC0700007337.mm.1 | -2,19 | 0,010598 | 0,422764                     |      |
| TC0700001749.mm.1 | -1,03 Ubfd1                   | JUC0700007805.mm.1 | -2,19 | 0,015936 | 0,45678                      |      |
| TC0700002424.mm.1 | 1,17 Ccdc9                    | JUC0700011380.mm.1 | -2,19 | 0,010136 | 0,419217                     |      |
| TC1100002948.mm.1 | 1,64 Zfp286                   | JUC1100014013.mm.1 | -2,19 | 0,025439 | 0,497549                     |      |
| TC1100002948.mm.1 | 1,64 Zfp286                   | JUC1100014016.mm.1 | -2,25 | 0,02997  | 0,511499                     |      |



|                   |                              |                    |       |          |          |                          |
|-------------------|------------------------------|--------------------|-------|----------|----------|--------------------------|
| TC0900003250.mm.1 | 1,05 Csrnp1                  | JUC0900015431.mm.1 | -2,19 | 0,034605 | 0,52602  |                          |
| TC0X00000976.mm.1 | -1,11                        | JUC0X00003219.mm.1 | -2,19 | 0,005948 | 0,385276 |                          |
| TC1000001149.mm.1 | 1,04 Tmcc3; A230066D03Rik    | JUC1000004706.mm.1 | -2,19 | 0,029363 | 0,509995 |                          |
| TC0800002145.mm.1 | 2,08 Fam149a                 | PSR0800016514.mm.1 | -2,2  | 0,018166 | 0,467441 | Cassette Exon 0,06       |
| TC0800002145.mm.1 | 2,08 Fam149a                 | PSR0800016504.mm.1 | -2,3  | 0,030191 | 0,512365 | Cassette Exon 0,21       |
| TC0800002145.mm.1 | 2,08 Fam149a                 | PSR0800016517.mm.1 | -2,75 | 0,016478 | 0,459352 | Alternative 5' Donc 0,28 |
| TC0800002145.mm.1 | 2,08 Fam149a                 | JUC0800008992.mm.1 | -2,97 | 0,016091 | 0,457532 |                          |
| TC1100003265.mm.1 | 1,27 Ankrd13b                | PSR1100030075.mm.1 | -2,2  | 0,001577 | 0,331726 | Intron Retention 0,28    |
| TC0100001464.mm.1 | 1,22 Gas5; Snord47; Gm26224; | PSR0100012042.mm.1 | -2,2  | 0,025299 | 0,497227 | Alternative 5' Donc 0,2  |
| TC1400000024.mm.1 | -1 Gm3159                    | PSR1400000373.mm.1 | -2,2  | 0,000483 | 0,298999 | Alternative 5' Donc 0,19 |
| TC1600001427.mm.1 | 1,84 Fgf12; B230343J05Rik    | PSR1600011790.mm.1 | -2,2  | 0,00123  | 0,322251 | Alternative 3' Acce 0,09 |
| TC1600001427.mm.1 | 1,84 Fgf12; B230343J05Rik    | PSR1600011807.mm.1 | -2,22 | 0,013815 | 0,445064 | Alternative 3' Acce 0,19 |
| TC1600001427.mm.1 | 1,84 Fgf12; B230343J05Rik    | PSR1600011813.mm.1 | -2,24 | 0,018271 | 0,468043 | Alternative 5' Donc 0,15 |
| TC1600001427.mm.1 | 1,84 Fgf12; B230343J05Rik    | PSR1600011804.mm.1 | -2,24 | 0,022575 | 0,487325 | Cassette Exon 0,04       |
| TC1600001427.mm.1 | 1,84 Fgf12; B230343J05Rik    | PSR1600011802.mm.1 | -2,35 | 0,023238 | 0,490032 | Alternative 3' Acce 0,18 |
| TC1600001427.mm.1 | 1,84 Fgf12; B230343J05Rik    | JUC1600006144.mm.1 | -2,56 | 0,033176 | 0,522044 |                          |
| TC1600001427.mm.1 | 1,84 Fgf12; B230343J05Rik    | PSR1600011806.mm.1 | -2,63 | 0,005029 | 0,374309 | Cassette Exon 0,05       |
| TC0300001858.mm.1 | 1,13 Trpc3                   | PSR0300014399.mm.1 | -2,2  | 0,036338 | 0,530547 | Alternative 3' Acce 0,18 |
| TC0900000463.mm.1 | 1,22 1700063D05Rik           | PSR0900003081.mm.1 | -2,2  | 0,049653 | 0,563521 | Alternative 3' Acce 0,18 |
| TC0100002070.mm.1 | 1,54 1110058L19Rik           | PSR0100016837.mm.1 | -2,2  | 0,045666 | 0,554786 | Cassette Exon 0,17       |
| TC0100002070.mm.1 | 1,54 1110058L19Rik           | PSR0100016838.mm.1 | -2,23 | 0,015219 | 0,452815 | Cassette Exon 0,12       |
| TC1300002594.mm.1 | -1,19 Nln                    | PSR1300017639.mm.1 | -2,2  | 0,004102 | 0,36228  | Alternative 3' Acce 0,15 |
| TC1100000037.mm.1 | 1,09 Sfa1                    | PSR1100000465.mm.1 | -2,2  | 0,024091 | 0,493095 | Cassette Exon 0,14       |
| TC1900001577.mm.1 | 1,95                         | PSR1900013966.mm.1 | -2,2  | 0,011188 | 0,426444 | Cassette Exon 0,14       |
| TC0X00002524.mm.1 | -1,13 Gm8787                 | PSR0X00016091.mm.1 | -2,2  | 0,012417 | 0,435195 | Cassette Exon 0,13       |
| TC1100000651.mm.1 | 1,96 Gm12239                 | PSR1100005265.mm.1 | -2,2  | 0,026062 | 0,499619 | Cassette Exon 0,13       |
| TC1200000073.mm.1 | -1,25 Matn3                  | PSR1200000778.mm.1 | -2,2  | 0,039152 | 0,538613 | Cassette Exon 0,13       |
| TC0700003526.mm.1 | 1,91 Sv2b                    | PSR0700029852.mm.1 | -2,2  | 0,022409 | 0,486711 | Cassette Exon 0,12       |
| TC0X00000596.mm.1 | 1,79 Sliotr2                 | PSR0X00003788.mm.1 | -2,2  | 0,000208 | 0,28803  | Cassette Exon 0,12       |
| TC1900000931.mm.1 | 1,52 Rbm4; Rbm14; Gm21992;   | PSR1900008193.mm.1 | -2,2  | 0,046063 | 0,555645 | Cassette Exon 0,12       |
| TC1900000931.mm.1 | 1,52 Rbm4; Rbm14; Gm21992;   | PSR1900008192.mm.1 | -2,66 | 0,015503 | 0,454456 | Cassette Exon 0,08       |
| TC1100001241.mm.1 | 1,01 Slnf4                   | PSR1100011646.mm.1 | -2,2  | 0,003852 | 0,358861 | Cassette Exon 0,11       |
| TC1100002134.mm.1 | -1,08 ZnrF3                  | PSR1100020807.mm.1 | -2,2  | 0,013809 | 0,445064 | Cassette Exon 0,11       |
| TC0800002950.mm.1 | 1,05 Ldhd                    | PSR0800022782.mm.1 | -2,2  | 0,040846 | 0,543283 | Alternative 3' Acce 0,06 |
| TC0900003102.mm.1 | 1,29 Dhx30                   | PSR0900026233.mm.1 | -2,2  | 0,00889  | 0,410717 | Cassette Exon 0,06       |
| TC0200002453.mm.1 | 1,07 Plcg1                   | JUC0200010162.mm.1 | -2,2  | 0,040097 | 0,541437 |                          |
| TC0200002453.mm.1 | 1,07 Plcg1                   | JUC0200010147.mm.1 | -2,34 | 0,009977 | 0,418456 |                          |
| TC0200005162.mm.1 | -1,07 Gm11464                | JUC0200022773.mm.1 | -2,2  | 0,012208 | 0,433286 |                          |
| TC1200001482.mm.1 | 1,17 3110053B16Rik           | JUC1200005745.mm.1 | -2,2  | 0,01146  | 0,427962 |                          |
| TC0300000139.mm.1 | 1,46 Hltf                    | JUC0300000294.mm.1 | -2,2  | 0,023883 | 0,492304 |                          |
| TC1200000287.mm.1 | -1,72 Atxn7l1                | JUC1200001283.mm.1 | -2,2  | 0,046946 | 0,557561 |                          |
| TC1800000638.mm.1 | -1,04 Sh3tc2                 | JUC1800002617.mm.1 | -2,2  | 0,010109 | 0,418998 |                          |
| TC1800000638.mm.1 | -1,04 Sh3tc2                 | JUC1800002612.mm.1 | -2,52 | 0,020086 | 0,4766   |                          |
| TC0100002008.mm.1 | 1,08 Tceb1                   | JUC0100009305.mm.1 | -2,2  | 0,048114 | 0,559875 |                          |
| TC1800000459.mm.1 | 1,03 A930012L18Rik           | PSR1800003380.mm.1 | -2,2  | 0,016274 | 0,45836  |                          |
| TC1500001091.mm.1 | 1,81 Zfp740                  | JUC1500004938.mm.1 | -2,2  | 0,047527 | 0,558686 |                          |
| TC1700000502.mm.1 | -1,39 Pi16                   | JUC1700002398.mm.1 | -2,2  | 0,048401 | 0,560658 |                          |
| TC0800001614.mm.1 | 1,23 Fcor                    | JUC0800007229.mm.1 | -2,2  | 0,030493 | 0,513341 |                          |

|                   |                              |                    |        |          |          |                     |      |
|-------------------|------------------------------|--------------------|--------|----------|----------|---------------------|------|
| TC0600001695.mm.1 | -1                           | JUC0600007072.mm.1 | -2,2   | 0,009599 | 0,417256 |                     |      |
| TC0700003038.mm.1 | 1,12 Saal1                   | JUC0700014832.mm.1 | -2,2   | 0,038693 | 0,537169 |                     |      |
| TC0300002977.mm.1 | 1,18 Arhgef38; D630013G24Ril | JUC0300012274.mm.1 | -2,2   | 0,038485 | 0,536539 |                     |      |
| TC0400004219.mm.1 | 1,38 B4galt2                 | JUC0400014127.mm.1 | -2,2   | 0,001725 | 0,335996 |                     |      |
| TC0400004047.mm.1 | -1,04 Pik3cd                 | JUC0400017550.mm.1 | -2,2   | 0,046458 | 0,556553 |                     |      |
| TC1000000835.mm.1 | 1,07 Abca7                   | JUC1000003362.mm.1 | -2,2   | 0,01709  | 0,462202 |                     |      |
| TC1000000835.mm.1 | 1,07 Abca7                   | JUC1000003351.mm.1 | -2,26  | 0,020463 | 0,478018 |                     |      |
| TC1300001661.mm.1 | 3,87 Gm11344; Gm11345; Gm1   | PSR1300010325.mm.1 | -2,21  | 0,022622 | 0,487464 | Cassette Exon       | 0,25 |
| TC1300001661.mm.1 | 3,87 Gm11344; Gm11345; Gm1   | PSR1300010329.mm.1 | -2,93  | 0,00216  | 0,344238 | Cassette Exon       | 0,17 |
| TC1300001661.mm.1 | 3,87 Gm11344; Gm11345; Gm1   | PSR1300010332.mm.1 | -3,05  | 0,028978 | 0,508779 | Cassette Exon       | 0,25 |
| TC1300001661.mm.1 | 3,87 Gm11344; Gm11345; Gm1   | JUC1300005295.mm.1 | -4,13  | 0,009592 | 0,417183 |                     |      |
| TC1300001661.mm.1 | 3,87 Gm11344; Gm11345; Gm1   | PSR1300010333.mm.1 | -4,18  | 0,004699 | 0,370633 | Cassette Exon       | 0,28 |
| TC1300001661.mm.1 | 3,87 Gm11344; Gm11345; Gm1   | JUC1300005297.mm.1 | -4,82  | 0,009339 | 0,415075 |                     |      |
| TC1300001661.mm.1 | 3,87 Gm11344; Gm11345; Gm1   | PSR1300010335.mm.1 | -5,17  | 0,004183 | 0,362669 | Cassette Exon       | 0,28 |
| TC1300001661.mm.1 | 3,87 Gm11344; Gm11345; Gm1   | PSR1300010334.mm.1 | -5,59  | 0,01986  | 0,475704 | Cassette Exon       | 0,25 |
| TC1300001661.mm.1 | 3,87 Gm11344; Gm11345; Gm1   | PSR1300010326.mm.1 | -5,65  | 0,001056 | 0,316361 | Cassette Exon       | 0,47 |
| TC1300001661.mm.1 | 3,87 Gm11344; Gm11345; Gm1   | PSR1300010336.mm.1 | -5,8   | 0,001396 | 0,325997 | Cassette Exon       | 0,28 |
| TC1300001661.mm.1 | 3,87 Gm11344; Gm11345; Gm1   | JUC1300005296.mm.1 | -7,14  | 0,028563 | 0,507547 |                     |      |
| TC1700000913.mm.1 | 13,97 Guca1b                 | PSR1700008753.mm.1 | -2,21  | 0,010279 | 0,420305 | Alternative 5' Donc | 0,11 |
| TC1700000913.mm.1 | 13,97 Guca1b                 | PSR1700008751.mm.1 | -2,39  | 0,003499 | 0,355638 | Cassette Exon       | 0,32 |
| TC1700000913.mm.1 | 13,97 Guca1b                 | PSR1700008752.mm.1 | -5,16  | 0,001218 | 0,322251 | Intron Retention    | 0,42 |
| TC1700000913.mm.1 | 13,97 Guca1b                 | JUC1700004688.mm.1 | -10,04 | 0,003505 | 0,355749 |                     |      |
| TC1200001245.mm.1 | 2,19 Klc1                    | PSR1200008902.mm.1 | -2,21  | 0,029013 | 0,508842 | Cassette Exon       | 0,26 |
| TC1200001245.mm.1 | 2,19 Klc1                    | PSR1200008890.mm.1 | -2,36  | 0,038279 | 0,536002 | Alternative 5' Donc | 0,19 |
| TC1200001245.mm.1 | 2,19 Klc1                    | PSR1200008896.mm.1 | -2,39  | 0,006486 | 0,390639 | Cassette Exon       | 0,16 |
| TC1200001245.mm.1 | 2,19 Klc1                    | JUC1200004857.mm.1 | -2,42  | 0,009424 | 0,415987 |                     |      |
| TC1200001245.mm.1 | 2,19 Klc1                    | JUC1200004866.mm.1 | -2,42  | 0,017002 | 0,461553 |                     |      |
| TC1200001245.mm.1 | 2,19 Klc1                    | PSR1200008875.mm.1 | -2,43  | 0,021178 | 0,480978 | Alternative 3' Acce | 0,23 |
| TC1200001245.mm.1 | 2,19 Klc1                    | JUC1200004868.mm.1 | -2,6   | 0,004028 | 0,361636 |                     |      |
| TC1200001245.mm.1 | 2,19 Klc1                    | PSR1200008901.mm.1 | -2,92  | 0,030426 | 0,513134 | Cassette Exon       | 0,16 |
| TC1200001245.mm.1 | 2,19 Klc1                    | JUC1200004870.mm.1 | -3,07  | 0,036964 | 0,532431 |                     |      |
| TC1200001245.mm.1 | 2,19 Klc1                    | PSR1200008903.mm.1 | -3,37  | 0,011182 | 0,426414 | Cassette Exon       | 0,37 |
| TC1200001245.mm.1 | 2,19 Klc1                    | PSR1200008904.mm.1 | -3,66  | 0,008424 | 0,406611 | Cassette Exon       | 0,34 |
| TC1200001245.mm.1 | 2,19 Klc1                    | JUC1200004871.mm.1 | -4,8   | 0,027998 | 0,505841 |                     |      |
| TC0400000234.mm.1 | 2,56 Epha7                   | PSR0400001437.mm.1 | -2,21  | 0,021049 | 0,480262 | Alternative 3' Acce | 0,12 |
| TC0400000234.mm.1 | 2,56 Epha7                   | PSR0400001440.mm.1 | -2,25  | 0,010852 | 0,424161 | Cassette Exon       | 0,11 |
| TC0400000234.mm.1 | 2,56 Epha7                   | PSR0400001463.mm.1 | -2,27  | 0,003124 | 0,353892 | Cassette Exon       | 0,11 |
| TC0400000234.mm.1 | 2,56 Epha7                   | PSR0400001449.mm.1 | -2,28  | 0,005114 | 0,376246 |                     |      |
| TC0400000234.mm.1 | 2,56 Epha7                   | PSR0400001450.mm.1 | -2,67  | 0,009587 | 0,417183 | Alternative 5' Donc | 0,06 |
| TC0400000234.mm.1 | 2,56 Epha7                   | PSR0400001459.mm.1 | -2,82  | 0,004505 | 0,36858  | Alternative 5' Donc | 0,27 |
| TC0400000234.mm.1 | 2,56 Epha7                   | PSR0400001471.mm.1 | -2,95  | 0,023686 | 0,491379 | Alternative 5' Donc | 0,26 |
| TC1300002347.mm.1 | 1,22 Ankrd32                 | PSR1300015534.mm.1 | -2,21  | 0,026497 | 0,501252 | Alternative 5' Donc | 0,16 |
| TC1300002347.mm.1 | 1,22 Ankrd32                 | JUC1300008161.mm.1 | -2,31  | 0,030722 | 0,514036 |                     |      |
| TC1300002347.mm.1 | 1,22 Ankrd32                 | PSR1300015530.mm.1 | -2,6   | 0,010145 | 0,419381 | Alternative 5' Donc | 0,25 |
| TC1100004061.mm.1 | 1,77 Nat9                    | PSR1100038101.mm.1 | -2,21  | 0,018732 | 0,470733 |                     |      |
| TC1100004061.mm.1 | 1,77 Nat9                    | PSR1100038113.mm.1 | -2,84  | 0,020322 | 0,477245 | Intron Retention    | 0,24 |
| TC1300000275.mm.1 | 1,66 Fam65b                  | PSR1300001608.mm.1 | -2,21  | 0,030958 | 0,514654 | Cassette Exon       | 0,23 |
| TC1300000275.mm.1 | 1,66 Fam65b                  | PSR1300001639.mm.1 | -2,26  | 0,01391  | 0,445962 | Cassette Exon       | 0,11 |

|                   |                             |                    |       |          |                              |      |
|-------------------|-----------------------------|--------------------|-------|----------|------------------------------|------|
| TC1300000275.mm.1 | 1,66 Fam65b                 | JUC1300000823.mm.1 | -4,1  | 0,046831 | 0,557144                     |      |
| TC0500002283.mm.1 | 1,24                        | PSR0500021055.mm.1 | -2,21 | 0,027932 | 0,505612 Intron Retention    | 0,18 |
| TC0500002283.mm.1 | 1,24                        | JUC0500011454.mm.1 | -3,76 | 0,013849 | 0,445398                     |      |
| TC0900000980.mm.1 | 1,06 Prtg                   | PSR0900007588.mm.1 | -2,21 | 0,005305 | 0,378059 Alternative 5' Donc | 0,18 |
| TC0X00002833.mm.1 | -1,41 Fndc3c1               | PSR0X00018021.mm.1 | -2,21 | 0,033727 | 0,523549 Alternative 3' Acce | 0,17 |
| TC0100001671.mm.1 | 2,03 Zbtb18                 | JUC0100007842.mm.1 | -2,21 | 0,027187 | 0,503342                     |      |
| TC0100001671.mm.1 | 2,03 Zbtb18                 | PSR0100013845.mm.1 | -2,49 | 0,00608  | 0,386691 Cassette Exon       | 0,16 |
| TC1400001652.mm.1 | 1,1                         | PSR1400012416.mm.1 | -2,21 | 0,018383 | 0,468484 Alternative 5' Donc | 0,16 |
| TC0300000548.mm.1 | 1,02 Mlf1                   | PSR0300003709.mm.1 | -2,21 | 0,013606 | 0,443731 Cassette Exon       | 0,15 |
| TC0500001584.mm.1 | 1,14 Por                    | PSR0500014291.mm.1 | -2,21 | 0,00972  | 0,417839 Cassette Exon       | 0,15 |
| TC1100003002.mm.1 | 1,07                        | PSR1100027233.mm.1 | -2,21 | 0,048778 | 0,561474 Cassette Exon       | 0,15 |
| TC0400000005.mm.1 | 1,05 Al838599               | PSR0400000024.mm.1 | -2,21 | 0,007606 | 0,401767 Intron Retention    | 0,12 |
| TC0400000005.mm.1 | 1,05 Al838599               | PSR0400000023.mm.1 | -2,43 | 0,0289   | 0,50858 Cassette Exon        | 0,14 |
| TC0700004285.mm.1 | 1,37 Cln3                   | JUC0700018916.mm.1 | -2,21 | 0,033927 | 0,524252                     |      |
| TC0700004285.mm.1 | 1,37 Cln3                   | PSR0700035768.mm.1 | -2,31 | 0,011646 | 0,42985 Cassette Exon        | 0,13 |
| TC0700004285.mm.1 | 1,37 Cln3                   | PSR0700035791.mm.1 | -2,31 | 0,027063 | 0,502979                     |      |
| TC1100001952.mm.1 | 2,34 Sec14l1                | PSR1100018620.mm.1 | -2,21 | 0,007238 | 0,39826 Cassette Exon        | 0,07 |
| TC1100001952.mm.1 | 2,34 Sec14l1                | PSR1100018597.mm.1 | -2,47 | 0,017022 | 0,461729 Cassette Exon       | 0,13 |
| TC1100001952.mm.1 | 2,34 Sec14l1                | JUC1100009678.mm.1 | -3,83 | 0,029921 | 0,511499                     |      |
| TC1100004288.mm.1 | 1,35 Urgcp                  | PSR1100020875.mm.1 | -2,21 | 0,000975 | 0,314364 Cassette Exon       | 0,13 |
| TC0200000339.mm.1 | 1,36 Thns1                  | PSR0200001591.mm.1 | -2,21 | 0,021131 | 0,480664 Alternative 3' Acce | 0,12 |
| TC0500001724.mm.1 | 2,38 Fscn1                  | PSR0500015806.mm.1 | -2,21 | 0,010533 | 0,42227 Alternative 3' Acce  | 0,12 |
| TC0700002119.mm.1 | 1,79 Gm7353                 | PSR0700019089.mm.1 | -2,21 | 0,011066 | 0,425887 Cassette Exon       | 0,12 |
| TC0X00001710.mm.1 | -1,38 Mid1                  | PSR0X00010951.mm.1 | -2,21 | 0,048302 | 0,560426 Cassette Exon       | 0,12 |
| TC0X00001710.mm.1 | -1,38 Mid1                  | PSR0X00010952.mm.1 | -2,44 | 0,023526 | 0,490947 Alternative 5' Donc | 0,08 |
| TC0X00001710.mm.1 | -1,38 Mid1                  | JUC0X00005565.mm.1 | -2,55 | 0,038553 | 0,536762                     |      |
| TC1900001071.mm.1 | 1,23 Ttc9c                  | PSR1900010038.mm.1 | -2,21 | 0,017997 | 0,466929 Alternative 3' Acce | 0,12 |
| TC0200001012.mm.1 | 1,65 Klhl23                 | PSR0200007989.mm.1 | -2,21 | 0,0162   | 0,458183 Cassette Exon       | 0,11 |
| TC0900002808.mm.1 | 2,67 9330159M07Rik          | PSR0900023304.mm.1 | -2,21 | 0,008808 | 0,409934 Cassette Exon       | 0,11 |
| TC0900002808.mm.1 | 2,67 9330159M07Rik          | PSR0900023311.mm.1 | -2,41 | 0,00324  | 0,354243 Cassette Exon       | 0,06 |
| TC0900002808.mm.1 | 2,67 9330159M07Rik          | JUC0900013045.mm.1 | -2,49 | 0,004663 | 0,370181                     |      |
| TC0900002808.mm.1 | 2,67 9330159M07Rik          | JUC0900013046.mm.1 | -2,55 | 0,040435 | 0,542058                     |      |
| TC0900002808.mm.1 | 2,67 9330159M07Rik          | JUC0900013047.mm.1 | -2,78 | 0,024199 | 0,493294                     |      |
| TC0900002808.mm.1 | 2,67 9330159M07Rik          | JUC0900013043.mm.1 | -2,93 | 0,004133 | 0,3623                       |      |
| TC0900002808.mm.1 | 2,67 9330159M07Rik          | JUC0900013044.mm.1 | -3,13 | 0,019078 | 0,472172                     |      |
| TC1200000355.mm.1 | 1,51 4930555J06Rik; Arl4aos | PSR1200002579.mm.1 | -2,21 | 0,02378  | 0,491795 Cassette Exon       | 0,11 |
| TC1800000825.mm.1 | 1,83 Pias2                  | PSR1800005993.mm.1 | -2,21 | 0,010338 | 0,420962 Cassette Exon       | 0,05 |
| TC1800000825.mm.1 | 1,83 Pias2                  | PSR1800005975.mm.1 | -2,34 | 0,012654 | 0,43631 Cassette Exon        | 0,1  |
| TC1800000825.mm.1 | 1,83 Pias2                  | JUC1800003309.mm.1 | -3,77 | 0,011885 | 0,431306                     |      |
| TC0700002769.mm.1 | 1,1 Zbtb32                  | PSR0700024676.mm.1 | -2,21 | 0,000581 | 0,304044 Cassette Exon       | 0,08 |
| TC1300002011.mm.1 | 1,54 Auh                    | PSR1300012536.mm.1 | -2,21 | 0,031515 | 0,516965 Cassette Exon       | 0,08 |
| TC1400002430.mm.1 | -1,19 Slc25a30              | JUC1400010396.mm.1 | -2,21 | 0,04194  | 0,545823                     |      |
| TC0300000841.mm.1 | -1,13 Gm4858                | JUC0300003386.mm.1 | -2,21 | 0,034289 | 0,525378                     |      |
| TC1700001638.mm.1 | -1,04 Tbl3                  | JUC1700007997.mm.1 | -2,21 | 0,018316 | 0,468088                     |      |
| TC0100002825.mm.1 | 1,21 9430060I03Rik          | JUC0100012963.mm.1 | -2,21 | 0,012453 | 0,43528                      |      |
| TC0100000417.mm.1 | 1,01 9130024F11Rik          | JUC0100001862.mm.1 | -2,21 | 0,01391  | 0,445962                     |      |
| TC1900000660.mm.1 | 1,34 Sema4g                 | JUC1900003123.mm.1 | -2,21 | 0,000874 | 0,311909                     |      |
| TC1500002250.mm.1 | -1,28 Galnt6                | JUC1500010530.mm.1 | -2,21 | 0,038783 | 0,537492                     |      |

|                   |                             |                    |        |          |                              |      |
|-------------------|-----------------------------|--------------------|--------|----------|------------------------------|------|
| TC0800001298.mm.1 | -1,14 Pkd1l3                | JUC0800005663.mm.1 | -2,21  | 0,000571 | 0,304044                     |      |
| TC0800002154.mm.1 | 1,74 Snx25                  | JUC0800009025.mm.1 | -2,21  | 0,006053 | 0,386642                     |      |
| TC0500002200.mm.1 | -1,22 Gm7596                | JUC0500010965.mm.1 | -2,21  | 0,002625 | 0,349612                     |      |
| TC0500002280.mm.1 | 2,93 Nsg1                   | JUC0500011434.mm.1 | -2,21  | 0,032692 | 0,520439                     |      |
| TC0700004011.mm.1 | -1,31 Gm1966; RP23-465M17.2 | JUC0700017562.mm.1 | -2,21  | 0,006068 | 0,386691                     |      |
| TC0400000446.mm.1 | 1,05 Npr2                   | JUC0400001498.mm.1 | -2,21  | 0,019634 | 0,474876                     |      |
| TC1000003150.mm.1 | 1,14 Zc3h10                 | JUC1000013029.mm.1 | -2,21  | 0,008373 | 0,406495                     |      |
| TC0400000532.mm.1 | -1,03 Msantd3               | JUC0400001985.mm.1 | -2,21  | 0,019802 | 0,475245                     |      |
| TC1000001239.mm.1 | -1,06 Rassf9                | JUC1000005027.mm.1 | -2,21  | 0,023476 | 0,490659                     |      |
| TC0X00000693.mm.1 | -1,37 Plxnb3                | JUC0X00002295.mm.1 | -2,21  | 0,041117 | 0,543958                     |      |
| TC0200005006.mm.1 | 3,18 Ndr3                   | PSR0200042774.mm.1 | -2,22  | 0,0046   | 0,369794 Intron Retention    | 0,24 |
| TC0200005006.mm.1 | 3,18 Ndr3                   | PSR0200042771.mm.1 | -2,27  | 0,007758 | 0,402774 Alternative 3' Acce | 0,2  |
| TC0200005006.mm.1 | 3,18 Ndr3                   | PSR0200042801.mm.1 | -2,29  | 0,019233 | 0,472971                     |      |
| TC0200005006.mm.1 | 3,18 Ndr3                   | PSR0200042791.mm.1 | -2,33  | 0,025581 | 0,497808 Alternative 3' Acce | 0,21 |
| TC0200005006.mm.1 | 3,18 Ndr3                   | PSR0200042790.mm.1 | -2,37  | 0,01334  | 0,441924 Alternative 3' Acce | 0,21 |
| TC0200005006.mm.1 | 3,18 Ndr3                   | PSR0200042793.mm.1 | -2,42  | 0,0338   | 0,523848 Alternative 5' Donc | 0,23 |
| TC0200005006.mm.1 | 3,18 Ndr3                   | PSR0200042797.mm.1 | -3,04  | 0,007832 | 0,403202 Cassette Exon       | 0,23 |
| TC0200005006.mm.1 | 3,18 Ndr3                   | JUC0200022072.mm.1 | -3,86  | 0,026639 | 0,50179                      |      |
| TC0200005006.mm.1 | 3,18 Ndr3                   | PSR0200042798.mm.1 | -3,99  | 0,0135   | 0,443238 Alternative 5' Donc | 0,15 |
| TC0200005006.mm.1 | 3,18 Ndr3                   | PSR0200042776.mm.1 | -4,27  | 0,000099 | 0,262646 Intron Retention    | 0,7  |
| TC0200005006.mm.1 | 3,18 Ndr3                   | PSR0200042789.mm.1 | -4,4   | 0,023793 | 0,491876 Cassette Exon       | 0,31 |
| TC0200005006.mm.1 | 3,18 Ndr3                   | JUC0200022069.mm.1 | -10,82 | 0,004234 | 0,363295                     |      |
| TC0100001610.mm.1 | 1,85 Igsf8                  | PSR0100013393.mm.1 | -2,22  | 0,030782 | 0,514144 Cassette Exon       | 0,11 |
| TC0100001610.mm.1 | 1,85 Igsf8                  | PSR0100013374.mm.1 | -2,79  | 0,036326 | 0,530547 Cassette Exon       | 0,17 |
| TC0100001610.mm.1 | 1,85 Igsf8                  | PSR0100013376.mm.1 | -3,19  | 0,024378 | 0,49362 Intron Retention     | 0,41 |
| TC0100001610.mm.1 | 1,85 Igsf8                  | JUC0100007567.mm.1 | -3,23  | 0,029445 | 0,51004                      |      |
| TC0100001610.mm.1 | 1,85 Igsf8                  | JUC0100007568.mm.1 | -3,98  | 0,037801 | 0,534736                     |      |
| TC0100002349.mm.1 | 2,25 Pgap1                  | PSR0100018990.mm.1 | -2,22  | 0,026348 | 0,50085 Alternative 5' Donc  | 0,22 |
| TC0100002349.mm.1 | 2,25 Pgap1                  | JUC0100010760.mm.1 | -2,58  | 0,026136 | 0,499937                     |      |
| TC0100002349.mm.1 | 2,25 Pgap1                  | JUC0100010762.mm.1 | -2,77  | 0,027073 | 0,502997                     |      |
| TC0100002349.mm.1 | 2,25 Pgap1                  | PSR0100018996.mm.1 | -2,89  | 0,038469 | 0,536428 Cassette Exon       | 0,31 |
| TC0100002349.mm.1 | 2,25 Pgap1                  | PSR0100018995.mm.1 | -3,14  | 0,034396 | 0,525711 Cassette Exon       | 0,27 |
| TC0100002349.mm.1 | 2,25 Pgap1                  | JUC0100010781.mm.1 | -3,49  | 0,045342 | 0,553891                     |      |
| TC0100002349.mm.1 | 2,25 Pgap1                  | JUC0100010764.mm.1 | -3,69  | 0,049693 | 0,563531                     |      |
| TC0100002349.mm.1 | 2,25 Pgap1                  | PSR0100019002.mm.1 | -4,16  | 0,022037 | 0,485268 Cassette Exon       | 0,38 |
| TC0300000530.mm.1 | 1,72 Lekr1                  | PSR0300003632.mm.1 | -2,22  | 0,020957 | 0,479982 Alternative 5' Donc | 0,11 |
| TC0300000530.mm.1 | 1,72 Lekr1                  | PSR0300003617.mm.1 | -3,34  | 0,005    | 0,373851 Alternative 5' Donc | 0,3  |
| TC0500002981.mm.1 | 1,29 Gtpbp6                 | PSR0500026342.mm.1 | -2,22  | 0,035679 | 0,529027 Intron Retention    | 0,28 |
| TC0700003738.mm.1 | 1,4 Ankrd42                 | PSR0700031481.mm.1 | -2,22  | 0,007103 | 0,396897 Cassette Exon       | 0,1  |
| TC0700003738.mm.1 | 1,4 Ankrd42                 | PSR0700031498.mm.1 | -2,81  | 0,000541 | 0,304044 Alternative 5' Donc | 0,28 |
| TC0X00002418.mm.1 | 1,63 Xlr3a                  | PSR0X00014910.mm.1 | -2,22  | 0,010133 | 0,419217 Alternative 5' Donc | 0,22 |
| TC0X00002418.mm.1 | 1,63 Xlr3a                  | JUC0X00007598.mm.1 | -2,72  | 0,019545 | 0,474538                     |      |
| TC0X00002418.mm.1 | 1,63 Xlr3a                  | PSR0X00014919.mm.1 | -2,73  | 0,024605 | 0,494497 Cassette Exon       | 0,18 |
| TC0X00002418.mm.1 | 1,63 Xlr3a                  | PSR0X00014927.mm.1 | -3,08  | 0,014641 | 0,450098 Cassette Exon       | 0,18 |
| TC1300000317.mm.1 | 1,5 A330102110Rik           | PSR1300001953.mm.1 | -2,22  | 0,001188 | 0,321162 Alternative 3' Acce | 0,22 |
| TC0100002607.mm.1 | 1,79 Resp18                 | PSR0100021234.mm.1 | -2,22  | 0,02056  | 0,478336 Cassette Exon       | 0,2  |
| TC0100002607.mm.1 | 1,79 Resp18                 | JUC0100012035.mm.1 | -3,58  | 0,02012  | 0,47686                      |      |
| TC0300002273.mm.1 | 1,57 Dclk2                  | PSR0300017066.mm.1 | -2,22  | 0,000445 | 0,297771 Alternative 3' Acce | 0,2  |

|                   |                             |                    |        |          |                              |      |
|-------------------|-----------------------------|--------------------|--------|----------|------------------------------|------|
| TC0300002273.mm.1 | 1,57 Dclk2                  | JUC0300008958.mm.1 | -4,91  | 0,008776 | 0,40982                      |      |
| TC0900002281.mm.1 | 2,04 Sik2                   | PSR0900019028.mm.1 | -2,22  | 0,005121 | 0,376275 Intron Retention    | 0,15 |
| TC0800000912.mm.1 | 2,19 Rnf150                 | PSR0800006730.mm.1 | -2,22  | 0,012647 | 0,436303 Alternative 3' Acce | 0,14 |
| TC1500000693.mm.1 | 1,17 Syngn1                 | PSR1500005199.mm.1 | -2,22  | 0,012074 | 0,43255 Cassette Exon        | 0,14 |
| TC0400001785.mm.1 | -1,15 Epha2                 | PSR0400014825.mm.1 | -2,22  | 0,006669 | 0,393187 Cassette Exon       | 0,13 |
| TC0700000851.mm.1 | -1,19 Plekha4               | PSR0700007362.mm.1 | -2,22  | 0,017375 | 0,463612 Cassette Exon       | 0,13 |
| TC0700004399.mm.1 | 1,45 lkzf5                  | PSR0700037021.mm.1 | -2,22  | 0,030212 | 0,512452 Cassette Exon       | 0,11 |
| TC0900001789.mm.1 | -1,19 Ccdc67                | PSR0900015075.mm.1 | -2,22  | 0,016544 | 0,459612 Cassette Exon       | 0,11 |
| TC1900000809.mm.1 | -1,03 Tdrd1                 | PSR1900007098.mm.1 | -2,22  | 0,024359 | 0,49362 Cassette Exon        | 0,1  |
| TC1400000530.mm.1 | 1,31 Tmem260                | JUC1400002534.mm.1 | -2,22  | 0,035274 | 0,52837                      |      |
| TC0300000775.mm.1 | 1,31 4933434E20Rik; 1700094 | JUC0300003142.mm.1 | -2,22  | 0,006383 | 0,389554                     |      |
| TC0300000775.mm.1 | 1,31 4933434E20Rik; 1700094 | JUC0300003144.mm.1 | -2,27  | 0,002446 | 0,349135                     |      |
| TC0300000769.mm.1 | -1,11 Adar                  | JUC0300003109.mm.1 | -2,22  | 0,038084 | 0,535633                     |      |
| TC1200000211.mm.1 | 1,46 Kidins220              | JUC1200000984.mm.1 | -2,22  | 0,017966 | 0,466781                     |      |
| TC1700002671.mm.1 | -1,05 2010106C02Rik         | JUC1700013108.mm.1 | -2,22  | 0,011033 | 0,425682                     |      |
| TC0100001903.mm.1 | 1,98                        | JUC0100008926.mm.1 | -2,22  | 0,034783 | 0,526754                     |      |
| TC1500001174.mm.1 | 1,55 Wdr70                  | JUC1500005314.mm.1 | -2,22  | 0,012419 | 0,435195                     |      |
| TC1500001174.mm.1 | 1,55 Wdr70                  | JUC1500005315.mm.1 | -4,25  | 0,041066 | 0,543798                     |      |
| TC0800002852.mm.1 | -1,06 Esp2                  | JUC0800012032.mm.1 | -2,22  | 0,034357 | 0,525572                     |      |
| TC0600000987.mm.1 | 1,24 Tia1                   | JUC0600003904.mm.1 | -2,22  | 0,046112 | 0,555792                     |      |
| TC0700001709.mm.1 | -1,5 Acsn5                  | JUC0700007380.mm.1 | -2,22  | 0,006992 | 0,395722                     |      |
| TC1000002927.mm.1 | -1,16 9530003J23Rik         | JUC1000012168.mm.1 | -2,22  | 0,026234 | 0,50019                      |      |
| TC0400000498.mm.1 | 1,44 Tdrd7                  | JUC0400001774.mm.1 | -2,22  | 0,012653 | 0,43631                      |      |
| TC0400000498.mm.1 | 1,44 Tdrd7                  | JUC0400001789.mm.1 | -2,24  | 0,025935 | 0,499126                     |      |
| TC1100002934.mm.1 | 1,13 Ncor1                  | JUC1100013939.mm.1 | -2,22  | 0,025401 | 0,497403                     |      |
| TC1100001926.mm.1 | -1,07                       | JUC1100009561.mm.1 | -2,22  | 0,002189 | 0,344463                     |      |
| TC0400001333.mm.1 | -1,21 Zmynd12               | JUC0400005284.mm.1 | -2,22  | 0,009878 | 0,417993                     |      |
| TC1300001169.mm.1 | 4,14 Sgtb                   | JUC1300003850.mm.1 | -2,23  | 0,00027  | 0,28803                      |      |
| TC1300001169.mm.1 | 4,14 Sgtb                   | PSR1300007396.mm.1 | -2,28  | 0,04194  | 0,545823 Cassette Exon       | 0,13 |
| TC1300001169.mm.1 | 4,14 Sgtb                   | PSR1300007386.mm.1 | -3,11  | 0,012751 | 0,436867 Cassette Exon       | 0,18 |
| TC1300001169.mm.1 | 4,14 Sgtb                   | PSR1300007385.mm.1 | -4,86  | 0,004718 | 0,370888 Alternative 3' Acce | 0,14 |
| TC1300001169.mm.1 | 4,14 Sgtb                   | PSR1300007401.mm.1 | -5,71  | 0,000654 | 0,304044 Alternative 5' Donc | 0,48 |
| TC1300001169.mm.1 | 4,14 Sgtb                   | JUC1300003856.mm.1 | -15,06 | 0,013367 | 0,442169                     |      |
| TC0100001339.mm.1 | 12,6 Pdc                    | JUC0100006364.mm.1 | -2,23  | 0,002751 | 0,350099                     |      |
| TC0100001339.mm.1 | 12,6 Pdc                    | JUC0100006362.mm.1 | -2,62  | 0,001854 | 0,337479                     |      |
| TC0100001339.mm.1 | 12,6 Pdc                    | PSR0100011037.mm.1 | -2,74  | 0,014034 | 0,44654 Cassette Exon        | 0,22 |
| TC0100001339.mm.1 | 12,6 Pdc                    | PSR0100011039.mm.1 | -3,97  | 0,0217   | 0,484104 Cassette Exon       | 0,39 |
| TC1400002124.mm.1 | -1,07 Gm16573               | PSR1400016381.mm.1 | -2,23  | 0,013795 | 0,444974 Cassette Exon       | 0,11 |
| TC1400002124.mm.1 | -1,07 Gm16573               | PSR1400016377.mm.1 | -3,01  | 0,006617 | 0,392269 Alternative 3' Acce | 0,32 |
| TC0700002594.mm.1 | 1,46 Zfp61                  | PSR0700022414.mm.1 | -2,23  | 0,024669 | 0,494682 Intron Retention    | 0,27 |
| TC0700002594.mm.1 | 1,46 Zfp61                  | PSR0700022412.mm.1 | -2,58  | 0,021908 | 0,484824 Alternative 3' Acce | 0,21 |
| TC0200005517.mm.1 | 2,29 Uckl1                  | PSR0200046535.mm.1 | -2,23  | 0,019717 | 0,474887 Cassette Exon       | 0,11 |
| TC0200005517.mm.1 | 2,29 Uckl1                  | PSR0200046528.mm.1 | -2,34  | 0,014767 | 0,450801 Intron Retention    | 0,26 |
| TC0200005517.mm.1 | 2,29 Uckl1                  | PSR0200046500.mm.1 | -3,08  | 0,007703 | 0,402552 Alternative 3' Acce | 0,25 |
| TC0200005517.mm.1 | 2,29 Uckl1                  | JUC0200023960.mm.1 | -3,53  | 0,027978 | 0,505748                     |      |
| TC0600002878.mm.1 | 1,37 Crbn                   | PSR0600022122.mm.1 | -2,23  | 0,035471 | 0,528724 Cassette Exon       | 0,14 |
| TC0800002702.mm.1 | 1,18 Ces1d                  | PSR0800020665.mm.1 | -2,23  | 0,049443 | 0,563154 Alternative 5' Donc | 0,13 |
| TC0200002961.mm.1 | 1,01 Pfkfb3                 | PSR0200024359.mm.1 | -2,23  | 0,045539 | 0,554382 Cassette Exon       | 0,11 |

|                   |                            |                    |       |          |          |                          |
|-------------------|----------------------------|--------------------|-------|----------|----------|--------------------------|
| TC140000797.mm.1  | 1,08 Khnyn                 | JUC1400003452.mm.1 | -2,23 | 0,028723 | 0,508141 |                          |
| TC1100004053.mm.1 | -1,09 Cd300ld              | JUC1100019948.mm.1 | -2,23 | 0,039127 | 0,538487 |                          |
| TC1300000790.mm.1 | 1,53                       | JUC1300002726.mm.1 | -2,23 | 0,02367  | 0,491379 |                          |
| TC1700002227.mm.1 | 1 Tspo2                    | JUC1700011218.mm.1 | -2,23 | 0,022656 | 0,487609 |                          |
| TC1800000900.mm.1 | 1,37                       | JUC1800003595.mm.1 | -2,23 | 0,017441 | 0,463827 |                          |
| TC1900000664.mm.1 | 1,11 Sfxn3                 | JUC1900003139.mm.1 | -2,23 | 0,021753 | 0,484278 |                          |
| TC0100001595.mm.1 | -1,13 Cd244; LOC677008     | JUC0100007459.mm.1 | -2,23 | 0,038688 | 0,537169 |                          |
| TC1600000149.mm.1 | -1,13 Ercc4                | JUC1600000540.mm.1 | -2,23 | 0,008642 | 0,408463 |                          |
| TC0500003727.mm.1 | 1,27 Tbc1d14               | JUC0500011310.mm.1 | -2,23 | 0,030907 | 0,514574 |                          |
| TC0800000530.mm.1 | 1,13 4933411K20Rik         | JUC0800002008.mm.1 | -2,23 | 0,019296 | 0,473074 |                          |
| TC0500000837.mm.1 | -1,34 5830473C10Rik        | JUC0500004039.mm.1 | -2,23 | 0,04876  | 0,561437 |                          |
| TC0500000837.mm.1 | -1,34 5830473C10Rik        | JUC0500004051.mm.1 | -2,94 | 0,017992 | 0,466929 |                          |
| TC0700000290.mm.1 | 1,1 Eml2; Mir330           | JUC0700001070.mm.1 | -2,23 | 0,048263 | 0,560283 |                          |
| TC0700002947.mm.1 | -1,04 4931406B18Rik        | JUC0700013932.mm.1 | -2,23 | 0,026386 | 0,501055 |                          |
| TC0700003434.mm.1 | -1,36 Lrrk1                | JUC0700015451.mm.1 | -2,23 | 0,024062 | 0,493026 |                          |
| TC0600000458.mm.1 | -1,11 Clcn1                | JUC0600001856.mm.1 | -2,23 | 0,033266 | 0,522243 |                          |
| TC1100002866.mm.1 | -1,05 Pemt                 | JUC1100013565.mm.1 | -2,23 | 0,043204 | 0,548962 |                          |
| TC0300001760.mm.1 | -1,19 Fndc3b               | JUC0300007205.mm.1 | -2,23 | 0,022666 | 0,487625 |                          |
| TC0900002887.mm.1 | 1,3 Zbtb38; E030011O05Rik  | JUC0900013292.mm.1 | -2,23 | 0,038094 | 0,535633 |                          |
| TC0900002887.mm.1 | 1,3 Zbtb38; E030011O05Rik  | JUC0900013284.mm.1 | -3,44 | 0,010201 | 0,419711 |                          |
| TC0500000319.mm.1 | 1,39 Gckr                  | PSR0500002822.mm.1 | -2,24 | 0,036536 | 0,531355 | Cassette Exon 0,19       |
| TC0500000319.mm.1 | 1,39 Gckr                  | JUC0500001541.mm.1 | -2,54 | 0,016688 | 0,460085 |                          |
| TC0500000319.mm.1 | 1,39 Gckr                  | PSR0500002837.mm.1 | -2,77 | 0,011926 | 0,431655 | Cassette Exon 0,25       |
| TC0500000319.mm.1 | 1,39 Gckr                  | JUC0500001550.mm.1 | -2,94 | 0,047535 | 0,558701 |                          |
| TC0X00002154.mm.1 | 1,84 Smarca1               | PSR0X00013591.mm.1 | -2,24 | 0,0051   | 0,375753 | Intron Retention 0,25    |
| TC0X00002154.mm.1 | 1,84 Smarca1               | PSR0X00013625.mm.1 | -2,29 | 0,049667 | 0,563531 | Alternative 5' Donc 0,13 |
| TC0X00002154.mm.1 | 1,84 Smarca1               | PSR0X00013594.mm.1 | -3,01 | 0,015925 | 0,456718 | Cassette Exon 0,21       |
| TC0X00002154.mm.1 | 1,84 Smarca1               | JUC0X00006940.mm.1 | -3,27 | 0,041225 | 0,544134 |                          |
| TC0X00002154.mm.1 | 1,84 Smarca1               | PSR0X00013628.mm.1 | -5,35 | 0,008063 | 0,40448  | Alternative 5' Donc 0,16 |
| TC0400002929.mm.1 | -1,36 Nfib                 | PSR0400023771.mm.1 | -2,24 | 0,0369   | 0,532283 | Cassette Exon 0,21       |
| TC0600003539.mm.1 | 2,57 D630045J12Rik         | PSR0600016518.mm.1 | -2,24 | 0,036693 | 0,531756 | Alternative 5' Donc 0,21 |
| TC0600003539.mm.1 | 2,57 D630045J12Rik         | PSR0600016537.mm.1 | -2,34 | 0,031518 | 0,516966 | Cassette Exon 0,12       |
| TC0600003539.mm.1 | 2,57 D630045J12Rik         | PSR0600016515.mm.1 | -2,53 | 0,021393 | 0,482022 | Cassette Exon 0,07       |
| TC0600003539.mm.1 | 2,57 D630045J12Rik         | PSR0600016519.mm.1 | -2,78 | 0,002062 | 0,341987 | Alternative 5' Donc 0,21 |
| TC0600003539.mm.1 | 2,57 D630045J12Rik         | JUC0600008660.mm.1 | -5,17 | 0,000476 | 0,298999 |                          |
| TC0300000309.mm.1 | 1,47 3110057O12Rik; Gm2011 | PSR0300002323.mm.1 | -2,24 | 0,014049 | 0,44654  | Cassette Exon 0,12       |
| TC0300000309.mm.1 | 1,47 3110057O12Rik; Gm2011 | PSR0300002299.mm.1 | -2,28 | 0,007012 | 0,395737 | Alternative 3' Acce 0,2  |
| TC0300000309.mm.1 | 1,47 3110057O12Rik; Gm2011 | PSR0300002284.mm.1 | -2,28 | 0,007012 | 0,395737 | Alternative 3' Acce 0,15 |
| TC0100003128.mm.1 | 1,65 Ipo9                  | PSR0100025384.mm.1 | -2,24 | 0,031237 | 0,51596  | Alternative 5' Donc 0,19 |
| TC0100000109.mm.1 | 2,38 Gdap1                 | PSR0100000771.mm.1 | -2,24 | 0,020793 | 0,479488 | Alternative 3' Acce 0,18 |
| TC1700002286.mm.1 | 1,11 Sgol1                 | PSR1700021392.mm.1 | -2,24 | 0,013521 | 0,443431 | Alternative 3' Acce 0,18 |
| TC0800002363.mm.1 | 2,57                       | PSR0800017760.mm.1 | -2,24 | 0,000243 | 0,28803  | Alternative 3' Acce 0,14 |
| TC0800002363.mm.1 | 2,57                       | PSR0800017759.mm.1 | -2,98 | 0,001371 | 0,32572  | Cassette Exon 0,17       |
| TC0500002774.mm.1 | 1,27                       | PSR0500024447.mm.1 | -2,24 | 0,045422 | 0,554105 | Alternative 5' Donc 0,16 |
| TC0600002178.mm.1 | 1,92 Fam115a               | JUC0600009023.mm.1 | -2,24 | 0,034463 | 0,525929 |                          |
| TC0600002178.mm.1 | 1,92 Fam115a               | PSR0600017193.mm.1 | -2,26 | 0,04404  | 0,550824 | Cassette Exon 0,15       |
| TC0600002178.mm.1 | 1,92 Fam115a               | PSR0600017186.mm.1 | -2,3  | 0,014654 | 0,450098 | Cassette Exon 0,04       |
| TC0600002178.mm.1 | 1,92 Fam115a               | JUC0600009024.mm.1 | -5,24 | 0,005842 | 0,383458 |                          |

|                   |                       |                    |       |          |                              |      |
|-------------------|-----------------------|--------------------|-------|----------|------------------------------|------|
| TC0600001983.mm.1 | 1,27 Tnp03            | PSR0600015624.mm.1 | -2,24 | 0,014647 | 0,450098 Alternative 3' Acce | 0,14 |
| TC0600001983.mm.1 | 1,27 Tnp03            | JUC0600008204.mm.1 | -2,35 | 0,010283 | 0,420351                     |      |
| TC0500000066.mm.1 | -1,03 Gm17091         | PSR0500000600.mm.1 | -2,24 | 0,010308 | 0,420505 Cassette Exon       | 0,11 |
| TC1700000990.mm.1 | -1,19 Emr4            | PSR1700009417.mm.1 | -2,24 | 0,019408 | 0,473802 Cassette Exon       | 0,09 |
| TC1400001012.mm.1 | 1,31 Gfra2            | PSR1400008125.mm.1 | -2,24 | 0,009267 | 0,414688 Cassette Exon       | 0,07 |
| TC0200003204.mm.1 | 1,12 Surf1            | JUC0200013613.mm.1 | -2,24 | 0,028525 | 0,507436                     |      |
| TC1200000061.mm.1 | -1,07 Hs1bp3          | JUC1200000340.mm.1 | -2,24 | 0,043483 | 0,549897                     |      |
| TC1300001028.mm.1 | 1,15 Acot12           | JUC1300003430.mm.1 | -2,24 | 0,00465  | 0,370181                     |      |
| TC1300001028.mm.1 | 1,15 Acot12           | JUC1300003426.mm.1 | -2,98 | 0,037716 | 0,534585                     |      |
| TC1700002664.mm.1 | 1,01                  | JUC1700013068.mm.1 | -2,24 | 0,007646 | 0,402193                     |      |
| TC1500001641.mm.1 | 1,28 Adcy8            | JUC1500006924.mm.1 | -2,24 | 0,028209 | 0,506368                     |      |
| TC0800001214.mm.1 | 1,35 Tmem208          | JUC0800005167.mm.1 | -2,24 | 0,021773 | 0,48438                      |      |
| TC0800001214.mm.1 | 1,35 Tmem208          | JUC0800005169.mm.1 | -2,59 | 0,03352  | 0,523109                     |      |
| TC0900001018.mm.1 | 2,24 Lysmd2           | JUC0900004375.mm.1 | -2,24 | 0,04496  | 0,552881                     |      |
| TC0900000749.mm.1 | 1,05 Celf6            | JUC0900002926.mm.1 | -2,24 | 0,024868 | 0,49558                      |      |
| TC0900000749.mm.1 | 1,05 Celf6            | JUC0900002927.mm.1 | -2,62 | 0,038099 | 0,535633                     |      |
| TC0900000863.mm.1 | -1,21 Fam96a          | JUC0900003567.mm.1 | -2,24 | 0,028914 | 0,50858                      |      |
| TC0900001680.mm.1 | 1,17 Gm26870          | JUC0900007965.mm.1 | -2,24 | 0,002336 | 0,347265                     |      |
| TC0500003234.mm.1 | 1,32 Diablo           | JUC0500015814.mm.1 | -2,24 | 0,049549 | 0,563325                     |      |
| TC0700003834.mm.1 | 1,08 Atg16l2          | JUC0700017091.mm.1 | -2,24 | 0,026439 | 0,501198                     |      |
| TC0700003613.mm.1 | -1,76 Fsd2            | JUC0700016241.mm.1 | -2,24 | 0,022985 | 0,488889                     |      |
| TC0700001793.mm.1 | -1,09 Il4ra           | JUC0700007995.mm.1 | -2,24 | 0,019855 | 0,475698                     |      |
| TC0700002625.mm.1 | 1,14 Dedd2            | JUC0700012041.mm.1 | -2,24 | 0,005759 | 0,383101                     |      |
| TC0300001354.mm.1 | 2,24 Ppa2             | JUC0300005711.mm.1 | -2,24 | 0,004833 | 0,371555                     |      |
| TC0300001354.mm.1 | 2,24 Ppa2             | JUC0300005713.mm.1 | -2,29 | 0,010649 | 0,422925                     |      |
| TC1100003395.mm.1 | -1,15 Heatr9; Gm11435 | JUC1100016262.mm.1 | -2,24 | 0,016662 | 0,460023                     |      |
| TC0300002489.mm.1 | 1,4 Ciart; Gm129      | JUC0300010103.mm.1 | -2,24 | 0,02944  | 0,509995                     |      |
| TC0400003258.mm.1 | -1,48 8030443G20Rik   | JUC0400013499.mm.1 | -2,24 | 0,048546 | 0,561008                     |      |
| TC1000000892.mm.1 | 1,63 Pip5k1c          | JUC1000003809.mm.1 | -2,24 | 0,03005  | 0,511812                     |      |
| TC0400002442.mm.1 | -1,07 4933428C19Rik   | JUC0400010234.mm.1 | -2,24 | 0,005637 | 0,381541                     |      |
| TC0400002082.mm.1 | 1,26 Cdk11b           | JUC0400009111.mm.1 | -2,24 | 0,027749 | 0,505023                     |      |
| TC0600000714.mm.1 | 3,74 Herc3            | PSR0600005492.mm.1 | -2,25 | 0,002328 | 0,346856 Intron Retention    | 0,29 |
| TC0600000714.mm.1 | 3,74 Herc3            | JUC0600002773.mm.1 | -2,31 | 0,018927 | 0,471339                     |      |
| TC0600000714.mm.1 | 3,74 Herc3            | PSR0600005517.mm.1 | -2,35 | 0,030229 | 0,512452 Alternative 5' Donc | 0,22 |
| TC0600000714.mm.1 | 3,74 Herc3            | PSR0600005508.mm.1 | -2,37 | 0,020519 | 0,478264 Cassette Exon       | 0,25 |
| TC0600000714.mm.1 | 3,74 Herc3            | PSR0600005509.mm.1 | -2,38 | 0,020352 | 0,47734 Cassette Exon        | 0,26 |
| TC0600000714.mm.1 | 3,74 Herc3            | PSR0600005476.mm.1 | -2,67 | 0,004711 | 0,370888 Cassette Exon       | 0,05 |
| TC0600000714.mm.1 | 3,74 Herc3            | JUC0600002766.mm.1 | -3,07 | 0,011994 | 0,432286                     |      |
| TC0600000714.mm.1 | 3,74 Herc3            | PSR0600005473.mm.1 | -3,08 | 0,013409 | 0,442624 Alternative 3' Acce | 0,04 |
| TC0600000714.mm.1 | 3,74 Herc3            | PSR0600005472.mm.1 | -3,1  | 0,005466 | 0,379939 Alternative 3' Acce | 0,04 |
| TC0600000714.mm.1 | 3,74 Herc3            | JUC0600002757.mm.1 | -3,17 | 0,005666 | 0,381922                     |      |
| TC0600000714.mm.1 | 3,74 Herc3            | PSR0600005474.mm.1 | -3,18 | 0,004229 | 0,363295 Alternative 3' Acce | 0,04 |
| TC0600000714.mm.1 | 3,74 Herc3            | PSR0600005512.mm.1 | -3,44 | 0,00145  | 0,328414 Cassette Exon       | 0,25 |
| TC0600000714.mm.1 | 3,74 Herc3            | PSR0600005471.mm.1 | -3,59 | 0,002508 | 0,349237 Alternative 3' Acce | 0,04 |
| TC0600000714.mm.1 | 3,74 Herc3            | PSR0600005478.mm.1 | -3,72 | 0,007287 | 0,398787 Cassette Exon       | 0,15 |
| TC0600000714.mm.1 | 3,74 Herc3            | PSR0600005511.mm.1 | -4,21 | 0,001067 | 0,316361 Cassette Exon       | 0,25 |
| TC0600000714.mm.1 | 3,74 Herc3            | PSR0600005489.mm.1 | -4,31 | 0,000976 | 0,314364 Alternative 3' Acce | 0,45 |
| TC0600000714.mm.1 | 3,74 Herc3            | PSR0600005494.mm.1 | -4,68 | 0,013417 | 0,442624 Cassette Exon       | 0,32 |

|                   |                             |                    |        |          |                              |      |
|-------------------|-----------------------------|--------------------|--------|----------|------------------------------|------|
| TC0600000714.mm.1 | 3,74 Herc3                  | PSR0600005470.mm.1 | -5,21  | 0,010224 | 0,419955 Alternative 3' Acce | 0,07 |
| TC0600000714.mm.1 | 3,74 Herc3                  | JUC0600002778.mm.1 | -13,33 | 0,001521 | 0,330287                     |      |
| TC1500001938.mm.1 | 1,57 AI848285               | PSR1500015263.mm.1 | -2,25  | 0,016255 | 0,458312 Alternative 3' Acce | 0,16 |
| TC1500001938.mm.1 | 1,57 AI848285               | PSR1500015265.mm.1 | -3,38  | 0,001686 | 0,335182 Alternative 5' Donc | 0,39 |
| TC1100002107.mm.1 | 1,39 Sec14I2                | PSR1100020454.mm.1 | -2,25  | 0,007607 | 0,401767 Intron Retention    | 0,3  |
| TC1100002107.mm.1 | 1,39 Sec14I2                | PSR1100020473.mm.1 | -2,52  | 0,031549 | 0,517128 Alternative 5' Donc | 0,17 |
| TC1100002107.mm.1 | 1,39 Sec14I2                | PSR1100020447.mm.1 | -2,81  | 0,0237   | 0,491427 Alternative 3' Acce | 0,29 |
| TC1500001772.mm.1 | 1,52 Oplah                  | PSR1500013527.mm.1 | -2,25  | 0,020233 | 0,477145 Intron Retention    | 0,28 |
| TC0600001092.mm.1 | 2,41 Slc6a6                 | JUC0600004346.mm.1 | -2,25  | 0,028767 | 0,508148                     |      |
| TC0600001092.mm.1 | 2,41 Slc6a6                 | PSR0600008547.mm.1 | -3,45  | 0,011672 | 0,429939 Alternative 3' Acce | 0,27 |
| TC0300001589.mm.1 | 1,04 Wls                    | PSR0300012794.mm.1 | -2,25  | 0,005614 | 0,381163 Alternative 5' Donc | 0,2  |
| TC1500001133.mm.1 | 2,2 Pde1b                   | PSR1500009130.mm.1 | -2,25  | 0,029264 | 0,509788 Cassette Exon       | 0,18 |
| TC1500001133.mm.1 | 2,2 Pde1b                   | PSR1500009129.mm.1 | -2,27  | 0,018523 | 0,469156 Cassette Exon       | 0,09 |
| TC1500001133.mm.1 | 2,2 Pde1b                   | PSR1500009127.mm.1 | -2,35  | 0,039447 | 0,539705 Cassette Exon       | 0,1  |
| TC1500001133.mm.1 | 2,2 Pde1b                   | PSR1500009131.mm.1 | -2,71  | 0,010028 | 0,41878 Cassette Exon        | 0,2  |
| TC0500000675.mm.1 | 1,12 Nipal1                 | PSR0500005958.mm.1 | -2,25  | 0,013423 | 0,442624 Alternative 5' Donc | 0,19 |
| TC0900001459.mm.1 | 1,46 Scap                   | PSR0900012176.mm.1 | -2,25  | 0,029864 | 0,511132 Cassette Exon       | 0,13 |
| TC0900001459.mm.1 | 1,46 Scap                   | PSR0900012157.mm.1 | -2,29  | 0,046078 | 0,555658 Alternative 3' Acce | 0,19 |
| TC0100002228.mm.1 | 2 Lonrf2                    | PSR0100017939.mm.1 | -2,25  | 0,009213 | 0,41403 Alternative 3' Acce  | 0,18 |
| TC1100004237.mm.1 | 1,36                        | PSR1100040648.mm.1 | -2,25  | 0,003598 | 0,356223 Alternative 5' Donc | 0,18 |
| TC0600003533.mm.1 | 1,21 TtlI3                  | PSR0600009689.mm.1 | -2,25  | 0,021334 | 0,481727 Alternative 3' Acce | 0,17 |
| TC0600003533.mm.1 | 1,21 TtlI3                  | JUC0600004985.mm.1 | -3,2   | 0,030126 | 0,512017                     |      |
| TC0800003218.mm.1 | 1,37 Map2k7                 | PSR0800000387.mm.1 | -2,25  | 0,0223   | 0,486095 Alternative 5' Donc | 0,15 |
| TC0800003218.mm.1 | 1,37 Map2k7                 | JUC0800000224.mm.1 | -4,55  | 0,045278 | 0,553722                     |      |
| TC0800003218.mm.1 | 1,37 Map2k7                 | JUC0800000225.mm.1 | -7,08  | 0,042709 | 0,548097                     |      |
| TC1000003119.mm.1 | 1,15 Lrp1                   | PSR1000023356.mm.1 | -2,25  | 0,040391 | 0,541998 Cassette Exon       | 0,15 |
| TC0600002496.mm.1 | -2,1 Tcf7l1                 | PSR0600019392.mm.1 | -2,25  | 0,005359 | 0,378582 Cassette Exon       | 0,14 |
| TC0900003269.mm.1 | 1,47 Sec22c                 | PSR0900027569.mm.1 | -2,25  | 0,01511  | 0,452474 Cassette Exon       | 0,14 |
| TC0200002569.mm.1 | 1,71                        | PSR0200021082.mm.1 | -2,25  | 0,027725 | 0,504939 Cassette Exon       | 0,13 |
| TC1400000866.mm.1 | 1,58 Trim13                 | PSR1400007050.mm.1 | -2,25  | 0,026997 | 0,502909 Cassette Exon       | 0,13 |
| TC0400001008.mm.1 | 1,17 Efcab7                 | PSR0400006808.mm.1 | -2,25  | 0,043135 | 0,548664 Cassette Exon       | 0,12 |
| TC0400001008.mm.1 | 1,17 Efcab7                 | JUC0400003480.mm.1 | -2,25  | 0,038667 | 0,537102                     |      |
| TC0600001089.mm.1 | 1,43                        | PSR0600008531.mm.1 | -2,25  | 0,002119 | 0,342919 Cassette Exon       | 0,12 |
| TC0200002087.mm.1 | -1,51 Sptlc3                | PSR0200016635.mm.1 | -2,25  | 0,020216 | 0,477145 Cassette Exon       | 0,11 |
| TC0600002281.mm.1 | 1,08 Hoxa7; Mira            | PSR0600017859.mm.1 | -2,25  | 0,03319  | 0,522148 Alternative 3' Acce | 0,08 |
| TC0500002344.mm.1 | 1,23 Fam184b                | JUC0500011721.mm.1 | -2,25  | 0,015895 | 0,456526                     |      |
| TC0500002344.mm.1 | 1,23 Fam184b                | PSR0500021491.mm.1 | -2,52  | 0,01261  | 0,435952 Alternative 5' Donc | 0,02 |
| TC1200001348.mm.1 | 1,84 Efr3b                  | JUC1200005344.mm.1 | -2,25  | 0,036789 | 0,532063                     |      |
| TC1200001348.mm.1 | 1,84 Efr3b                  | JUC1200005342.mm.1 | -2,43  | 0,005599 | 0,381115                     |      |
| TC1200001348.mm.1 | 1,84 Efr3b                  | JUC1200005331.mm.1 | -3,63  | 0,028781 | 0,508148                     |      |
| TC1200001348.mm.1 | 1,84 Efr3b                  | JUC1200005353.mm.1 | -3,88  | 0,017916 | 0,466466                     |      |
| TC1100004081.mm.1 | 1,53 Gga3                   | JUC1100020111.mm.1 | -2,25  | 0,025621 | 0,497926                     |      |
| TC1200000047.mm.1 | 1,56                        | JUC1200000291.mm.1 | -2,25  | 0,023018 | 0,489186                     |      |
| TC1300000838.mm.1 | 1,04 Fastkd3                | JUC1300002852.mm.1 | -2,25  | 0,012315 | 0,434392                     |      |
| TC1700002347.mm.1 | -1,21 Dennd1c               | JUC1700011800.mm.1 | -2,25  | 0,018298 | 0,468049                     |      |
| TC0200000587.mm.1 | 1,55 St6galnac6; St6galnac4 | JUC0200002741.mm.1 | -2,25  | 0,039672 | 0,540322                     |      |
| TC0800001263.mm.1 | 1,1 Nip7                    | JUC0800005549.mm.1 | -2,25  | 0,001659 | 0,334751                     |      |
| TC0800001263.mm.1 | 1,1 Nip7                    | JUC0800005548.mm.1 | -2,27  | 0,00049  | 0,298999                     |      |



|                   |                                |                    |        |          |                              |      |
|-------------------|--------------------------------|--------------------|--------|----------|------------------------------|------|
| TC0800001209.mm.1 | -1,14 Hsf4                     | JUC0800005113.mm.1 | -2,25  | 0,02202  | 0,485226                     |      |
| TC0800002700.mm.1 | -1,27 Ces1b                    | JUC0800011222.mm.1 | -2,25  | 0,032464 | 0,519612                     |      |
| TC0700000284.mm.1 | 1,39 Dmwd                      | JUC0700001031.mm.1 | -2,25  | 0,028598 | 0,507685                     |      |
| TC0700000946.mm.1 | -1,08 Atp10a                   | JUC0700004440.mm.1 | -2,25  | 0,034416 | 0,525828                     |      |
| TC0700000853.mm.1 | -1,01 Bcat2                    | JUC0700003681.mm.1 | -2,25  | 0,017605 | 0,464312                     |      |
| TC0600003589.mm.1 | 1,06 Adck1; Iglkv8-24          | JUC0600009781.mm.1 | -2,25  | 0,048961 | 0,5618                       |      |
| TC0700002980.mm.1 | 1,22 Prmt1                     | JUC0700014276.mm.1 | -2,25  | 0,00218  | 0,344453                     |      |
| TC0700003982.mm.1 | -1,03 Hpx                      | JUC0700017459.mm.1 | -2,25  | 0,046114 | 0,555792                     |      |
| TC0700002310.mm.1 | -1,45 Nlrp4d                   | JUC0700011075.mm.1 | -2,25  | 0,030585 | 0,513425                     |      |
| TC1100000168.mm.1 | 1,73 Cnrip1                    | PSR1100001497.mm.1 | -2,25  | 0,03533  | 0,528404                     |      |
| TC1100000168.mm.1 | 1,73 Cnrip1                    | JUC1100000808.mm.1 | -3,46  | 0,003282 | 0,354243                     |      |
| TC0400000090.mm.1 | 1,35 1110037F02Rik             | JUC0400000280.mm.1 | -2,25  | 0,026285 | 0,50053                      |      |
| TC1000002211.mm.1 | -1,06 Oit3                     | JUC1000008424.mm.1 | -2,25  | 0,037518 | 0,533968                     |      |
| TC0400000702.mm.1 | -1,09 Bspry                    | JUC0400002472.mm.1 | -2,25  | 0,027317 | 0,503743                     |      |
| TC1100003641.mm.1 | 1,08 Npepps                    | JUC1100017516.mm.1 | -2,25  | 0,021043 | 0,480262                     |      |
| TC1100003641.mm.1 | 1,08 Npepps                    | JUC1100017520.mm.1 | -3,86  | 0,044169 | 0,551056                     |      |
| TC1100001591.mm.1 | -1,16                          | JUC1100007736.mm.1 | -2,25  | 0,0026   | 0,349501                     |      |
| TC1200002411.mm.1 | 3,51 Ckb                       | JUC1200009226.mm.1 | -2,26  | 0,022051 | 0,485327                     |      |
| TC1200002411.mm.1 | 3,51 Ckb                       | PSR1200016738.mm.1 | -2,58  | 0,031032 | 0,515011 Intron Retention    | 0,37 |
| TC1200002411.mm.1 | 3,51 Ckb                       | PSR1200016744.mm.1 | -3,82  | 0,030731 | 0,514036 Alternative 5' Donc | 0,32 |
| TC1200002411.mm.1 | 3,51 Ckb                       | PSR1200016728.mm.1 | -4,63  | 0,016679 | 0,460085 Intron Retention    | 0,67 |
| TC1200002411.mm.1 | 3,51 Ckb                       | PSR1200016730.mm.1 | -4,91  | 0,021948 | 0,485095 Intron Retention    | 0,67 |
| TC0900002327.mm.1 | 2,12 Chrna3                    | PSR0900019549.mm.1 | -2,26  | 0,031228 | 0,515879 Alternative 5' Donc | 0,2  |
| TC0900002327.mm.1 | 2,12 Chrna3                    | PSR0900019545.mm.1 | -2,61  | 0,013528 | 0,443465 Intron Retention    | 0,4  |
| TC0900002327.mm.1 | 2,12 Chrna3                    | PSR0900019547.mm.1 | -3,5   | 0,003121 | 0,353892 Intron Retention    | 0,62 |
| TC0900002327.mm.1 | 2,12 Chrna3                    | PSR0900019540.mm.1 | -3,55  | 0,004722 | 0,370888 Alternative 3' Acce | 0,39 |
| TC1700002359.mm.1 | 8,81 2610034M16Rik             | PSR1700022159.mm.1 | -2,26  | 0,02125  | 0,481431 Cassette Exon       | 0,15 |
| TC1700002359.mm.1 | 8,81 2610034M16Rik             | PSR1700022162.mm.1 | -3,38  | 0,009647 | 0,417354 Cassette Exon       | 0,25 |
| TC1700002359.mm.1 | 8,81 2610034M16Rik             | PSR1700022170.mm.1 | -4,03  | 0,000576 | 0,304044 Cassette Exon       | 0,24 |
| TC1700002359.mm.1 | 8,81 2610034M16Rik             | JUC1700011892.mm.1 | -5,05  | 0,007001 | 0,395737                     |      |
| TC1700002359.mm.1 | 8,81 2610034M16Rik             | PSR1700022163.mm.1 | -6,44  | 0,000198 | 0,28803 Cassette Exon        | 0,55 |
| TC1700002359.mm.1 | 8,81 2610034M16Rik             | JUC1700011893.mm.1 | -10,78 | 0,001789 | 0,336311                     |      |
| TC1700002359.mm.1 | 8,81 2610034M16Rik             | JUC1700011902.mm.1 | -11,1  | 0,001146 | 0,317344                     |      |
| TC1800000468.mm.1 | 1,92 Kcnn2                     | PSR1800003449.mm.1 | -2,26  | 0,041882 | 0,545743 Cassette Exon       | 0,3  |
| TC1800000468.mm.1 | 1,92 Kcnn2                     | JUC1800001932.mm.1 | -3,3   | 0,006434 | 0,390027                     |      |
| TC1800000468.mm.1 | 1,92 Kcnn2                     | PSR1800003444.mm.1 | -3,59  | 0,006103 | 0,387177 Alternative 5' Donc | 0,42 |
| TC0800002441.mm.1 | 1,25 Fcho1                     | JUC0800010168.mm.1 | -2,26  | 0,044976 | 0,552889                     |      |
| TC0800002441.mm.1 | 1,25 Fcho1                     | PSR0800018710.mm.1 | -2,56  | 0,008669 | 0,408667 Intron Retention    | 0,34 |
| TC0600000725.mm.1 | 1,07 Ccser1                    | PSR0600005574.mm.1 | -2,26  | 0,001301 | 0,323375 Alternative 5' Donc | 0,22 |
| TC1600002056.mm.1 | 1,44 Urb1                      | JUC1600008099.mm.1 | -2,26  | 0,04531  | 0,553742                     |      |
| TC1600002056.mm.1 | 1,44 Urb1                      | PSR1600015751.mm.1 | -2,28  | 0,036773 | 0,531983 Cassette Exon       | 0,12 |
| TC1600002056.mm.1 | 1,44 Urb1                      | PSR1600015735.mm.1 | -2,37  | 0,035908 | 0,529399 Cassette Exon       | 0,22 |
| TC1600002056.mm.1 | 1,44 Urb1                      | JUC1600008109.mm.1 | -2,74  | 0,036572 | 0,531378                     |      |
| TC1600002056.mm.1 | 1,44 Urb1                      | JUC1600008117.mm.1 | -2,77  | 0,005615 | 0,381191                     |      |
| TC1600002056.mm.1 | 1,44 Urb1                      | JUC1600008121.mm.1 | -5,52  | 0,014527 | 0,449545                     |      |
| TC0300000258.mm.1 | 1,48 Atp11b                    | PSR0300001635.mm.1 | -2,26  | 0,021778 | 0,48438 Alternative 3' Acce  | 0,2  |
| TC0700000818.mm.1 | 1,03 Nup62-il4i1; Il4i1; Nup62 | PSR0700006831.mm.1 | -2,26  | 0,018599 | 0,469657 Alternative 5' Donc | 0,19 |
| TC0700000818.mm.1 | 1,03 Nup62-il4i1; Il4i1; Nup62 | PSR0700006821.mm.1 | -2,28  | 0,026883 | 0,502518 Alternative 5' Donc | 0,08 |

|                   |                    |                    |       |          |                              |      |
|-------------------|--------------------|--------------------|-------|----------|------------------------------|------|
| TC0400001141.mm.1 | -1,16 Echdc2       | PSR0400008069.mm.1 | -2,26 | 0,034248 | 0,525178 Alternative 5' Donc | 0,17 |
| TC0700004166.mm.1 | 1,64 Smg1          | PSR0700034615.mm.1 | -2,26 | 0,0282   | 0,506368 Cassette Exon       | 0,15 |
| TC1400002328.mm.1 | 1,06 Rhobtb2       | PSR1400018056.mm.1 | -2,26 | 0,005635 | 0,381532 Cassette Exon       | 0,13 |
| TC1000000366.mm.1 | 1,5 Ppil6          | PSR1000002523.mm.1 | -2,26 | 0,004716 | 0,370888 Cassette Exon       | 0,12 |
| TC1500000992.mm.1 | 1,23               | PSR1500007743.mm.1 | -2,26 | 0,029947 | 0,511499 Cassette Exon       | 0,12 |
| TC0X00002393.mm.1 | 1,73 BC023829      | PSR0X00014768.mm.1 | -2,26 | 0,048196 | 0,560128 Alternative 3' Acce | 0,1  |
| TC0X00002393.mm.1 | 1,73 BC023829      | JUC0X00007530.mm.1 | -2,51 | 0,025639 | 0,498009                     |      |
| TC0X00002393.mm.1 | 1,73 BC023829      | JUC0X00007527.mm.1 | -2,75 | 0,025444 | 0,497549                     |      |
| TC0X00002393.mm.1 | 1,73 BC023829      | JUC0X00007532.mm.1 | -4,71 | 0,022549 | 0,487254                     |      |
| TC1200001874.mm.1 | 1,16 L2hgdh        | JUC1200007066.mm.1 | -2,26 | 0,028886 | 0,50858                      |      |
| TC1300002208.mm.1 | -1,04 Cntnap3      | JUC1300007426.mm.1 | -2,26 | 0,011428 | 0,427656                     |      |
| TC0100000240.mm.1 | -1,41 Arid5a       | JUC0100000835.mm.1 | -2,26 | 0,042025 | 0,546158                     |      |
| TC0200001634.mm.1 | -1,13 Slc5a12      | JUC0200006102.mm.1 | -2,26 | 0,009639 | 0,417354                     |      |
| TC0200001634.mm.1 | -1,13 Slc5a12      | JUC0200006101.mm.1 | -2,5  | 0,010258 | 0,420147                     |      |
| TC1500002144.mm.1 | -1,55              | JUC1500009796.mm.1 | -2,26 | 0,030742 | 0,514065                     |      |
| TC1500000613.mm.1 | -1,25 Commd5       | JUC1500002574.mm.1 | -2,26 | 0,04289  | 0,548183                     |      |
| TC1700000594.mm.1 | -1,13 Ndufa7       | JUC1700003008.mm.1 | -2,26 | 0,000981 | 0,31497                      |      |
| TC0800001113.mm.1 | 1,1 Rspry1         | JUC0800004642.mm.1 | -2,26 | 0,019972 | 0,476227                     |      |
| TC0800002366.mm.1 | 2,04               | JUC0800009652.mm.1 | -2,26 | 0,030583 | 0,513421                     |      |
| TC0800000724.mm.1 | -1,05 Atp13a1      | JUC0800002589.mm.1 | -2,26 | 0,005819 | 0,383169                     |      |
| TC0500001404.mm.1 | 1,35 A930024E05Rik | JUC0500006811.mm.1 | -2,26 | 0,041645 | 0,545276                     |      |
| TC0500001404.mm.1 | 1,35 A930024E05Rik | JUC0500006810.mm.1 | -2,61 | 0,00268  | 0,349612                     |      |
| TC0500001370.mm.1 | 1,05 Atxn2         | JUC0500006641.mm.1 | -2,26 | 0,020861 | 0,479521                     |      |
| TC0500001370.mm.1 | 1,05 Atxn2         | JUC0500006655.mm.1 | -3,19 | 0,007738 | 0,402774                     |      |
| TC0600000974.mm.1 | 1,07 Tprkb         | JUC0600003847.mm.1 | -2,26 | 0,035365 | 0,528536                     |      |
| TC0700000978.mm.1 | -1,02 Mtmr10       | JUC0700004570.mm.1 | -2,26 | 0,0329   | 0,521149                     |      |
| TC0700002740.mm.1 | 1,35 Zfp14         | JUC0700012955.mm.1 | -2,26 | 0,015493 | 0,454456                     |      |
| TC0300002298.mm.1 | -1,06 Ttc24        | JUC0300009141.mm.1 | -2,26 | 0,020259 | 0,477245                     |      |
| TC0400003393.mm.1 | -1,17 Tie1         | JUC0400014356.mm.1 | -2,26 | 0,022505 | 0,487114                     |      |
| TC0400001992.mm.1 | -1,09 Tnfrsf9      | JUC0400008552.mm.1 | -2,26 | 0,027426 | 0,503961                     |      |
| TC0100002332.mm.1 | 3,33 Pms1          | PSR0100018782.mm.1 | -2,27 | 0,005664 | 0,381922 Cassette Exon       | 0,14 |
| TC0100002332.mm.1 | 3,33 Pms1          | PSR0100018777.mm.1 | -2,92 | 0,012985 | 0,439245 Cassette Exon       | 0,27 |
| TC0100002332.mm.1 | 3,33 Pms1          | PSR0100018776.mm.1 | -3,23 | 0,007208 | 0,398121 Cassette Exon       | 0,25 |
| TC0100002332.mm.1 | 3,33 Pms1          | PSR0100018779.mm.1 | -3,23 | 0,006348 | 0,389463 Cassette Exon       | 0,22 |
| TC0100002332.mm.1 | 3,33 Pms1          | PSR0100018796.mm.1 | -3,3  | 0,010378 | 0,421341                     |      |
| TC0100002332.mm.1 | 3,33 Pms1          | PSR0100018773.mm.1 | -3,32 | 0,001828 | 0,337273 Cassette Exon       | 0,35 |
| TC0100002332.mm.1 | 3,33 Pms1          | PSR0100018772.mm.1 | -3,4  | 0,007186 | 0,397855 Cassette Exon       | 0,48 |
| TC0100002332.mm.1 | 3,33 Pms1          | PSR0100018795.mm.1 | -3,56 | 0,018399 | 0,468484 Alternative 3' Acce | 0,04 |
| TC0100002332.mm.1 | 3,33 Pms1          | PSR0100018798.mm.1 | -3,61 | 0,008263 | 0,405976 Cassette Exon       | 0,24 |
| TC0100002332.mm.1 | 3,33 Pms1          | JUC0100010604.mm.1 | -3,71 | 0,007142 | 0,397526                     |      |
| TC0100002332.mm.1 | 3,33 Pms1          | PSR0100018778.mm.1 | -3,74 | 0,003123 | 0,353892 Cassette Exon       | 0,36 |
| TC0100002332.mm.1 | 3,33 Pms1          | PSR0100018797.mm.1 | -4,03 | 0,006887 | 0,39446                      |      |
| TC0100002332.mm.1 | 3,33 Pms1          | PSR0100018775.mm.1 | -4,1  | 0,004295 | 0,364027 Cassette Exon       | 0,32 |
| TC0100002332.mm.1 | 3,33 Pms1          | JUC0100010620.mm.1 | -4,27 | 0,038865 | 0,537834                     |      |
| TC0100002332.mm.1 | 3,33 Pms1          | JUC0100010605.mm.1 | -7,19 | 0,00173  | 0,335996                     |      |
| TC0100002332.mm.1 | 3,33 Pms1          | PSR0100018771.mm.1 | -7,45 | 0,003207 | 0,354243 Cassette Exon       | 0,4  |
| TC1300002258.mm.1 | 1,63 Zfp738        | PSR1300014734.mm.1 | -2,27 | 0,026913 | 0,502518                     |      |
| TC1300002258.mm.1 | 1,63 Zfp738        | PSR1300014740.mm.1 | -2,73 | 0,017165 | 0,46232 Alternative 3' Acce  | 0,33 |

|                   |                              |                    |       |          |          |                          |
|-------------------|------------------------------|--------------------|-------|----------|----------|--------------------------|
| TC1300002258.mm.1 | 1,63 Zfp738                  | JUC1300007688.mm.1 | -2,77 | 0,045769 | 0,554863 |                          |
| TC1300002258.mm.1 | 1,63 Zfp738                  | PSR1300014741.mm.1 | -4,01 | 0,031757 | 0,517489 | Alternative 3' Acce 0,44 |
| TC0200003304.mm.1 | 1,42 Slc25a25                | PSR0200028111.mm.1 | -2,27 | 0,002342 | 0,347317 | Intron Retention 0,31    |
| TC0200003304.mm.1 | 1,42 Slc25a25                | PSR0200028122.mm.1 | -2,33 | 0,006726 | 0,393343 | Cassette Exon 0,16       |
| TC0600003123.mm.1 | 2,5 Gpr162                   | PSR0600024346.mm.1 | -2,27 | 0,033587 | 0,523246 | Cassette Exon 0,25       |
| TC0600003123.mm.1 | 2,5 Gpr162                   | PSR0600024345.mm.1 | -2,29 | 0,014955 | 0,451968 | Cassette Exon 0,29       |
| TC0600003123.mm.1 | 2,5 Gpr162                   | JUC0600012674.mm.1 | -2,44 | 0,006301 | 0,389081 |                          |
| TC0600003123.mm.1 | 2,5 Gpr162                   | JUC0600012676.mm.1 | -2,98 | 0,034575 | 0,52602  |                          |
| TC0600003123.mm.1 | 2,5 Gpr162                   | JUC0600012677.mm.1 | -5,23 | 0,006567 | 0,39213  |                          |
| TC0200000474.mm.1 | 1,46 Gm13421                 | PSR0200003219.mm.1 | -2,27 | 0,025282 | 0,497095 | Intron Retention 0,26    |
| TC0800002674.mm.1 | 2,55 Tox3                    | PSR0800020459.mm.1 | -2,27 | 0,003058 | 0,353892 | Cassette Exon 0,23       |
| TC0800002674.mm.1 | 2,55 Tox3                    | PSR0800020452.mm.1 | -2,43 | 0,015567 | 0,454866 | Alternative 3' Acce 0,17 |
| TC0800002674.mm.1 | 2,55 Tox3                    | PSR0800020471.mm.1 | -2,49 | 0,006643 | 0,392838 | Alternative 5' Donc 0,16 |
| TC0800002674.mm.1 | 2,55 Tox3                    | PSR0800020468.mm.1 | -2,53 | 0,006266 | 0,388719 | Alternative 5' Donc 0,16 |
| TC0800002674.mm.1 | 2,55 Tox3                    | PSR0800020454.mm.1 | -2,56 | 0,010323 | 0,420714 | Alternative 3' Acce 0,22 |
| TC0800002674.mm.1 | 2,55 Tox3                    | JUC0800011114.mm.1 | -3,2  | 0,030293 | 0,512642 |                          |
| TC1500001395.mm.1 | 2,01 Ncald; Gm15941          | PSR1500010788.mm.1 | -2,27 | 0,021645 | 0,483726 | Cassette Exon 0,17       |
| TC1500001395.mm.1 | 2,01 Ncald; Gm15941          | PSR1500010787.mm.1 | -2,35 | 0,038295 | 0,536095 | Cassette Exon 0,08       |
| TC1500001395.mm.1 | 2,01 Ncald; Gm15941          | PSR1500010774.mm.1 | -2,75 | 0,043467 | 0,549841 | Alternative 3' Acce 0,19 |
| TC1500001395.mm.1 | 2,01 Ncald; Gm15941          | JUC1500006040.mm.1 | -3,21 | 0,00914  | 0,413447 |                          |
| TC1500001395.mm.1 | 2,01 Ncald; Gm15941          | PSR1500010799.mm.1 | -3,59 | 0,035178 | 0,528119 | Cassette Exon 0,06       |
| TC1500001395.mm.1 | 2,01 Ncald; Gm15941          | JUC1500006043.mm.1 | -4,18 | 0,005169 | 0,376797 |                          |
| TC1500001395.mm.1 | 2,01 Ncald; Gm15941          | PSR1500010780.mm.1 | -5,65 | 0,006756 | 0,393343 | Cassette Exon 0,23       |
| TC0800000526.mm.1 | 1,61 Lrp2bp                  | PSR0800003691.mm.1 | -2,27 | 0,02676  | 0,502096 | Alternative 5' Donc 0,13 |
| TC0800000526.mm.1 | 1,61 Lrp2bp                  | PSR0800003695.mm.1 | -2,51 | 0,00378  | 0,357586 | Alternative 3' Acce 0,21 |
| TC0500000648.mm.1 | 1,41 Slc30a9                 | PSR0500005762.mm.1 | -2,27 | 0,007767 | 0,402774 | Alternative 5' Donc 0,2  |
| TC1200002083.mm.1 | 1,24 Arel1; Gm17193          | PSR1200014421.mm.1 | -2,27 | 0,017046 | 0,461805 | Alternative 5' Donc 0,2  |
| TC1200002083.mm.1 | 1,24 Arel1; Gm17193          | PSR1200014385.mm.1 | -2,32 | 0,025899 | 0,498978 | Alternative 3' Acce 0,12 |
| TC0700004506.mm.1 | 1,68 Zfp941                  | PSR0700037848.mm.1 | -2,27 | 0,005208 | 0,377078 | Alternative 5' Donc 0,19 |
| TC1700001665.mm.1 | 1,64 Sox8                    | PSR1700015182.mm.1 | -2,27 | 0,014705 | 0,45037  | Alternative 3' Acce 0,18 |
| TC0800000323.mm.1 | 1,31 Whsc111                 | PSR0800002422.mm.1 | -2,27 | 0,012027 | 0,432286 | Alternative 5' Donc 0,13 |
| TC0400002397.mm.1 | 1,24 Mob3b                   | PSR0400019463.mm.1 | -2,27 | 0,007041 | 0,396259 | Cassette Exon 0,12       |
| TC1100000763.mm.1 | 1,27 Smcr8                   | PSR1100006130.mm.1 | -2,27 | 0,047213 | 0,558132 | Cassette Exon 0,12       |
| TC1400002046.mm.1 | -1,24                        | PSR1400015392.mm.1 | -2,27 | 0,013924 | 0,446193 | Cassette Exon 0,12       |
| TC1900000026.mm.1 | 1,02 Cdk2ap2                 | PSR1900000321.mm.1 | -2,27 | 0,00951  | 0,416602 | Alternative 3' Acce 0,06 |
| TC0200003280.mm.1 | 1,22 Tor1a                   | JUC0200014028.mm.1 | -2,27 | 0,044408 | 0,551503 |                          |
| TC0200003492.mm.1 | 1,54 Orc4                    | PSR0200029825.mm.1 | -2,27 | 0,002979 | 0,352501 |                          |
| TC1100004257.mm.1 | 1,19 Gm12590                 | JUC1100021405.mm.1 | -2,27 | 0,000728 | 0,306408 |                          |
| TC1100004257.mm.1 | 1,19 Gm12590                 | PSR1100040840.mm.1 | -2,29 | 0,016708 | 0,460199 |                          |
| TC1200000110.mm.1 | 1,2 Nbas                     | JUC1200000595.mm.1 | -2,27 | 0,014119 | 0,447137 |                          |
| TC1300002596.mm.1 | 1,08 Trappc13; 2410002O22Rik | JUC1300009451.mm.1 | -2,27 | 0,027685 | 0,504781 |                          |
| TC0100000572.mm.1 | -1,35 Cps1                   | JUC0100002747.mm.1 | -2,27 | 0,023767 | 0,491731 |                          |
| TC1700000670.mm.1 | 1,1 Bag6                     | JUC1700003768.mm.1 | -2,27 | 0,029096 | 0,50908  |                          |
| TC0800001092.mm.1 | -1,26 Mt4                    | JUC0800004490.mm.1 | -2,27 | 0,010923 | 0,424725 |                          |
| TC0800000019.mm.1 | 1 Retn                       | JUC0800000158.mm.1 | -2,27 | 0,012913 | 0,438297 |                          |
| TC0500000316.mm.1 | -1,01 Snx17                  | JUC0500001501.mm.1 | -2,27 | 0,018939 | 0,471376 |                          |
| TC0900001658.mm.1 | 1,15 Clec3b                  | JUC0900007853.mm.1 | -2,27 | 0,025991 | 0,499207 |                          |
| TC0500000462.mm.1 | -1,17 C1qtnf7                | JUC0500002470.mm.1 | -2,27 | 0,021176 | 0,480978 |                          |

|                   |                               |                    |        |          |                              |      |
|-------------------|-------------------------------|--------------------|--------|----------|------------------------------|------|
| TC0500000170.mm.1 | 1,39 Gsap                     | JUC0500000679.mm.1 | -2,27  | 0,03545  | 0,52871                      |      |
| TC0500000170.mm.1 | 1,39 Gsap                     | JUC0500000685.mm.1 | -3,79  | 0,009255 | 0,414559                     |      |
| TC0600002315.mm.1 | 1,21 Fkbp14                   | JUC0600009465.mm.1 | -2,27  | 0,040149 | 0,541609                     |      |
| TC0600001519.mm.1 | 1,07                          | JUC0600006511.mm.1 | -2,27  | 0,026009 | 0,499257                     |      |
| TC0300003181.mm.1 | -1,06 Tnni3k                  | JUC0300013080.mm.1 | -2,27  | 0,039758 | 0,540533                     |      |
| TC0X00003411.mm.1 | 1,12 Ppp1r3f                  | JUC0X00005659.mm.1 | -2,27  | 0,022649 | 0,487589                     |      |
| TC0400003631.mm.1 | 1,07 Zcchc17                  | JUC0400015485.mm.1 | -2,27  | 0,003664 | 0,357266                     |      |
| TC1100001156.mm.1 | 2,94 Aldoc                    | PSR1100010738.mm.1 | -2,28  | 0,010441 | 0,421595 Cassette Exon       | 0,25 |
| TC1100001156.mm.1 | 2,94 Aldoc                    | PSR1100010742.mm.1 | -2,41  | 0,005866 | 0,383835 Alternative 3' Acce | 0,36 |
| TC1100001156.mm.1 | 2,94 Aldoc                    | PSR1100010744.mm.1 | -2,45  | 0,026714 | 0,502096 Alternative 3' Acce | 0,36 |
| TC1100001156.mm.1 | 2,94 Aldoc                    | JUC1100005645.mm.1 | -3,93  | 0,002343 | 0,347317                     |      |
| TC1100001156.mm.1 | 2,94 Aldoc                    | PSR1100010754.mm.1 | -3,98  | 0,003937 | 0,359818 Alternative 5' Donc | 0,48 |
| TC1100001156.mm.1 | 2,94 Aldoc                    | JUC1100005647.mm.1 | -3,99  | 0,003341 | 0,354243                     |      |
| TC1400000923.mm.1 | 19,84 Mir124a-1; Mir3078; A93 | PSR1400007348.mm.1 | -2,28  | 0,031929 | 0,518048 Cassette Exon       | 0,12 |
| TC1400000923.mm.1 | 19,84 Mir124a-1; Mir3078; A93 | PSR1400007338.mm.1 | -4,04  | 0,000879 | 0,311909                     |      |
| TC1400000923.mm.1 | 19,84 Mir124a-1; Mir3078; A93 | PSR1400007339.mm.1 | -7,26  | 0,000612 | 0,304044 Intron Retention    | 0,38 |
| TC1400000923.mm.1 | 19,84 Mir124a-1; Mir3078; A93 | PSR1400007337.mm.1 | -9,75  | 0,000854 | 0,311909                     |      |
| TC1400000923.mm.1 | 19,84 Mir124a-1; Mir3078; A93 | PSR1400007343.mm.1 | -10    | 0,000486 | 0,298999 Alternative 5' Donc | 0,47 |
| TC1400000923.mm.1 | 19,84 Mir124a-1; Mir3078; A93 | JUC1400003937.mm.1 | -10,82 | 0,017432 | 0,463827                     |      |
| TC0300003248.mm.1 | 2,94 Rnpc3                    | PSR0300021959.mm.1 | -2,28  | 0,025724 | 0,498173 Alternative 3' Acce | 0,22 |
| TC0300003248.mm.1 | 2,94 Rnpc3                    | PSR0300021964.mm.1 | -2,4   | 0,025697 | 0,498173 Alternative 3' Acce | 0,19 |
| TC0300003248.mm.1 | 2,94 Rnpc3                    | PSR0300021980.mm.1 | -2,86  | 0,013604 | 0,443731 Alternative 5' Donc | 0,3  |
| TC0300003248.mm.1 | 2,94 Rnpc3                    | PSR0300021982.mm.1 | -2,86  | 0,046581 | 0,556761 Alternative 5' Donc | 0,3  |
| TC0300003248.mm.1 | 2,94 Rnpc3                    | PSR0300021969.mm.1 | -3,97  | 0,010104 | 0,418998 Alternative 5' Donc | 0,41 |
| TC0900000002.mm.1 | 1,76 Gm11168                  | JUC0900000010.mm.1 | -2,28  | 0,027042 | 0,502979                     |      |
| TC0900000002.mm.1 | 1,76 Gm11168                  | JUC0900000014.mm.1 | -5,11  | 0,033405 | 0,522793                     |      |
| TC0900000002.mm.1 | 1,76 Gm11168                  | PSR0900000021.mm.1 | -6,5   | 0,023609 | 0,491012 Alternative 5' Donc | 0,41 |
| TC1500000982.mm.1 | 1,68 Cacnb3                   | PSR1500007700.mm.1 | -2,28  | 0,045486 | 0,554313 Intron Retention    | 0,32 |
| TC0800000124.mm.1 | 6,36 2810030D12Rik            | PSR0800001146.mm.1 | -2,28  | 0,002079 | 0,342181 Cassette Exon       | 0,2  |
| TC0800000124.mm.1 | 6,36 2810030D12Rik            | PSR0800001145.mm.1 | -7,12  | 0,000048 | 0,24627 Alternative 3' Acce  | 0,28 |
| TC0800000124.mm.1 | 6,36 2810030D12Rik            | PSR0800001147.mm.1 | -8,11  | 0,000134 | 0,270905 Cassette Exon       | 0,28 |
| TC0X00001534.mm.1 | 1,3 Smc1a                     | PSR0X00009728.mm.1 | -2,28  | 0,000602 | 0,304044 Alternative 5' Donc | 0,19 |
| TC0X00001534.mm.1 | 1,3 Smc1a                     | PSR0X00009738.mm.1 | -3,03  | 0,002451 | 0,349135 Alternative 3' Acce | 0,27 |
| TC0600002550.mm.1 | 2,73 Hk2                      | PSR0600019732.mm.1 | -2,28  | 0,036405 | 0,530878 Alternative 5' Donc | 0,2  |
| TC0600002550.mm.1 | 2,73 Hk2                      | PSR0600019729.mm.1 | -2,31  | 0,019643 | 0,474876 Cassette Exon       | 0,25 |
| TC0600002550.mm.1 | 2,73 Hk2                      | JUC0600010250.mm.1 | -2,51  | 0,015704 | 0,455416                     |      |
| TC0600002550.mm.1 | 2,73 Hk2                      | JUC0600010247.mm.1 | -2,7   | 0,00332  | 0,354243                     |      |
| TC0600002550.mm.1 | 2,73 Hk2                      | PSR0600019730.mm.1 | -2,89  | 0,014745 | 0,450641 Cassette Exon       | 0,25 |
| TC0600002550.mm.1 | 2,73 Hk2                      | JUC0600010259.mm.1 | -4,6   | 0,037991 | 0,535386                     |      |
| TC0600002550.mm.1 | 2,73 Hk2                      | JUC0600010261.mm.1 | -4,85  | 0,013739 | 0,444758                     |      |
| TC0700000421.mm.1 | 2,24 Exosc5                   | PSR0700003293.mm.1 | -2,28  | 0,039742 | 0,540494 Intron Retention    | 0,23 |
| TC0900002680.mm.1 | 2,06 Tmod2                    | PSR0900022171.mm.1 | -2,28  | 0,047849 | 0,559373 Cassette Exon       | 0,21 |
| TC0900002680.mm.1 | 2,06 Tmod2                    | JUC0900012422.mm.1 | -4,71  | 0,027588 | 0,504485                     |      |
| TC0800001533.mm.1 | 2,7 Rab4a                     | PSR0800012594.mm.1 | -2,28  | 0,009852 | 0,417839 Alternative 5' Donc | 0,2  |
| TC1400002859.mm.1 | 1,13 Hacl1                    | PSR1400013073.mm.1 | -2,28  | 0,001073 | 0,316484 Alternative 5' Donc | 0,2  |
| TC0400001726.mm.1 | 1,28 Mul1                     | PSR0400014120.mm.1 | -2,28  | 0,03442  | 0,525828 Alternative 5' Donc | 0,17 |
| TC0200001803.mm.1 | 1,32 Ccndbp1                  | PSR0200013906.mm.1 | -2,28  | 0,045372 | 0,55404 Alternative 5' Donc  | 0,15 |
| TC0400003170.mm.1 | 2,16 Insl5                    | PSR0400025173.mm.1 | -2,28  | 0,016112 | 0,457756 Cassette Exon       | 0,14 |

|                   |                             |                    |       |          |                              |      |
|-------------------|-----------------------------|--------------------|-------|----------|------------------------------|------|
| TC1100003472.mm.1 | 2,69 Ppm1e                  | PSR1100031890.mm.1 | -2,28 | 0,028825 | 0,508407 Cassette Exon       | 0,14 |
| TC1100003472.mm.1 | 2,69 Ppm1e                  | PSR1100031891.mm.1 | -2,64 | 0,006558 | 0,39213 Cassette Exon        | 0,13 |
| TC0400000736.mm.1 | -1,21 Pappa                 | PSR0400005279.mm.1 | -2,28 | 0,029884 | 0,51129 Cassette Exon        | 0,13 |
| TC1100001352.mm.1 | 1,4 Bzrap1                  | PSR1100012684.mm.1 | -2,28 | 0,009926 | 0,418378 Alternative 5' Donc | 0,13 |
| TC1100001352.mm.1 | 1,4 Bzrap1                  | JUC1100006655.mm.1 | -3,81 | 0,014884 | 0,451777                     |      |
| TC1400000347.mm.1 | 1,28 Ercc6                  | PSR1400003072.mm.1 | -2,28 | 0,04537  | 0,55404 Alternative 5' Donc  | 0,13 |
| TC1400000347.mm.1 | 1,28 Ercc6                  | JUC1400001835.mm.1 | -2,75 | 0,038196 | 0,535805                     |      |
| TC1600001311.mm.1 | 2,15 Dgcr8; Mir1306; Gm2457 | PSR1600010774.mm.1 | -2,28 | 0,039667 | 0,540294 Alternative 3' Acce | 0,13 |
| TC1600001311.mm.1 | 2,15 Dgcr8; Mir1306; Gm2457 | JUC1600005626.mm.1 | -2,3  | 0,012985 | 0,439245                     |      |
| TC0300001715.mm.1 | 1,45                        | PSR0300013507.mm.1 | -2,28 | 0,000101 | 0,262646 Cassette Exon       | 0,12 |
| TC0300003091.mm.1 | 1,07 Wdr63                  | PSR0300024348.mm.1 | -2,28 | 0,010215 | 0,419955 Cassette Exon       | 0,12 |
| TC0300003091.mm.1 | 1,07 Wdr63                  | JUC0300012766.mm.1 | -3,05 | 0,04799  | 0,559574                     |      |
| TC1300002285.mm.1 | 1,45 lce1                   | PSR1300014941.mm.1 | -2,28 | 0,018769 | 0,470771 Cassette Exon       | 0,11 |
| TC0200003407.mm.1 | 1,3 Dennd1a                 | JUC0200014765.mm.1 | -2,28 | 0,049108 | 0,562191                     |      |
| TC1300000990.mm.1 | 1,53 Ccnh                   | JUC1300003361.mm.1 | -2,28 | 0,047526 | 0,558686                     |      |
| TC0100000918.mm.1 | -1,15                       | JUC0100004408.mm.1 | -2,28 | 0,009386 | 0,415457                     |      |
| TC0100000829.mm.1 | 1,7 Dgkd                    | JUC0100004057.mm.1 | -2,28 | 0,016134 | 0,457846                     |      |
| TC1800000969.mm.1 | 1,4 Rock1                   | JUC1800003983.mm.1 | -2,28 | 0,017584 | 0,464264                     |      |
| TC1500001716.mm.1 | -1,72 2300005B03Rik         | JUC1500007363.mm.1 | -2,28 | 0,04459  | 0,552                        |      |
| TC0200001959.mm.1 | 1,36 Sirpa                  | JUC0200007779.mm.1 | -2,28 | 0,009525 | 0,416602                     |      |
| TC0200001959.mm.1 | 1,36 Sirpa                  | JUC0200007789.mm.1 | -2,29 | 0,018717 | 0,47064                      |      |
| TC0200001959.mm.1 | 1,36 Sirpa                  | JUC0200007790.mm.1 | -2,46 | 0,005038 | 0,37456                      |      |
| TC0100003341.mm.1 | -1,03 Pappa2; 1600012P17Rik | JUC0100015659.mm.1 | -2,28 | 0,038314 | 0,536169                     |      |
| TC0800002392.mm.1 | -1,01 Klhl26                | JUC0800009838.mm.1 | -2,28 | 0,020173 | 0,477086                     |      |
| TC0900001329.mm.1 | 1,3 Pik3r4                  | JUC0900005719.mm.1 | -2,28 | 0,018866 | 0,471054                     |      |
| TC0900001329.mm.1 | 1,3 Pik3r4                  | JUC0900005710.mm.1 | -2,35 | 0,01894  | 0,471388                     |      |
| TC0900000259.mm.1 | 1,07 lgsf9b                 | JUC0900001067.mm.1 | -2,28 | 0,027628 | 0,504625                     |      |
| TC0500003143.mm.1 | -1,04                       | JUC0500015209.mm.1 | -2,28 | 0,041147 | 0,544                        |      |
| TC1100002862.mm.1 | 1,41 Flcn                   | JUC1100013515.mm.1 | -2,28 | 0,037333 | 0,533573                     |      |
| TC1100003046.mm.1 | -1,07 Efnb3                 | JUC1100014608.mm.1 | -2,28 | 0,001494 | 0,329143                     |      |
| TC0400004118.mm.1 | -1,24 Arhgef16              | JUC0400017933.mm.1 | -2,28 | 0,033023 | 0,521478                     |      |
| TC0400001741.mm.1 | 1,17 Capzb                  | PSR0400014245.mm.1 | -2,28 | 0,019808 | 0,475245                     |      |
| TC0400001916.mm.1 | -1,07                       | JUC0400008190.mm.1 | -2,28 | 0,043567 | 0,550033                     |      |
| TC0400002755.mm.1 | -1,14 Susd1                 | JUC0400011620.mm.1 | -2,28 | 0,038241 | 0,535883                     |      |
| TC1100001725.mm.1 | 3,14 Mapt                   | PSR1100016303.mm.1 | -2,29 | 0,046377 | 0,556329 Alternative 3' Acce | 0,13 |
| TC1100001725.mm.1 | 3,14 Mapt                   | JUC1100008448.mm.1 | -2,65 | 0,019798 | 0,475212                     |      |
| TC1100001725.mm.1 | 3,14 Mapt                   | PSR1100016315.mm.1 | -2,81 | 0,029575 | 0,510456 Cassette Exon       | 0,1  |
| TC1100001725.mm.1 | 3,14 Mapt                   | JUC1100008433.mm.1 | -3,13 | 0,041791 | 0,545586                     |      |
| TC1100001725.mm.1 | 3,14 Mapt                   | PSR1100016292.mm.1 | -3,21 | 0,026206 | 0,500046 Cassette Exon       | 0,19 |
| TC1100001725.mm.1 | 3,14 Mapt                   | PSR1100016311.mm.1 | -3,24 | 0,026171 | 0,50003 Cassette Exon        | 0,25 |
| TC1100001725.mm.1 | 3,14 Mapt                   | JUC1100008437.mm.1 | -3,64 | 0,002593 | 0,349501                     |      |
| TC1100001725.mm.1 | 3,14 Mapt                   | PSR1100016313.mm.1 | -4,21 | 0,031069 | 0,515106 Alternative 3' Acce | 0,38 |
| TC1100001725.mm.1 | 3,14 Mapt                   | JUC1100008442.mm.1 | -4,39 | 0,012608 | 0,435952                     |      |
| TC1100001725.mm.1 | 3,14 Mapt                   | PSR1100016306.mm.1 | -4,42 | 0,030592 | 0,51344 Cassette Exon        | 0,44 |
| TC1100001725.mm.1 | 3,14 Mapt                   | PSR1100016307.mm.1 | -5,89 | 0,013007 | 0,439291 Cassette Exon       | 0,45 |
| TC1100001725.mm.1 | 3,14 Mapt                   | JUC1100008444.mm.1 | -6,88 | 0,045094 | 0,553169                     |      |
| TC0400000777.mm.1 | 2,38 Kdm4c                  | JUC0400002819.mm.1 | -2,29 | 0,002031 | 0,341377                     |      |
| TC0400000777.mm.1 | 2,38 Kdm4c                  | PSR0400005485.mm.1 | -2,34 | 0,006538 | 0,391916 Cassette Exon       | 0,24 |

|                    |                               |                    |       |          |                              |      |
|--------------------|-------------------------------|--------------------|-------|----------|------------------------------|------|
| TC0400000777.mm.1  | 2,38 Kdm4c                    | PSR0400005512.mm.1 | -2,45 | 0,013284 | 0,441719 Alternative 5' Donc | 0,16 |
| TC0400000777.mm.1  | 2,38 Kdm4c                    | PSR0400005488.mm.1 | -2,47 | 0,004193 | 0,362939 Cassette Exon       | 0,17 |
| TC0400000777.mm.1  | 2,38 Kdm4c                    | PSR0400005483.mm.1 | -2,98 | 0,020657 | 0,478862 Cassette Exon       | 0,24 |
| TC0400000777.mm.1  | 2,38 Kdm4c                    | PSR0400005491.mm.1 | -3,12 | 0,011863 | 0,430929 Cassette Exon       | 0,3  |
| TC0400000777.mm.1  | 2,38 Kdm4c                    | JUC0400002831.mm.1 | -3,17 | 0,031638 | 0,517405                     |      |
| TC0200001564.mm.1  | 1,79 Cstf3                    | PSR0200011752.mm.1 | -2,29 | 0,03683  | 0,532211 Cassette Exon       | 0,12 |
| TC0200001564.mm.1  | 1,79 Cstf3                    | PSR0200011718.mm.1 | -2,72 | 0,020348 | 0,47734 Alternative 3' Acce  | 0,27 |
| TC0200001564.mm.1  | 1,79 Cstf3                    | PSR0200011712.mm.1 | -3    | 0,043879 | 0,550542 Alternative 3' Acce | 0,28 |
| TC12000001555.mm.1 | 2,82 5730507C01Rik            | PSR1200001309.mm.1 | -2,29 | 0,022718 | 0,487767 Alternative 5' Donc | 0,14 |
| TC12000001555.mm.1 | 2,82 5730507C01Rik            | PSR1200001306.mm.1 | -3,02 | 0,011398 | 0,427549 Alternative 3' Acce | 0,26 |
| TC0400000118.mm.1  | 2,43 Runx1t1                  | JUC0400000395.mm.1 | -2,29 | 0,016352 | 0,458693                     |      |
| TC0400000118.mm.1  | 2,43 Runx1t1                  | PSR0400000802.mm.1 | -2,35 | 0,014106 | 0,447123 Alternative 5' Donc | 0,25 |
| TC0400000118.mm.1  | 2,43 Runx1t1                  | JUC0400000398.mm.1 | -2,41 | 0,023971 | 0,492725                     |      |
| TC0400000118.mm.1  | 2,43 Runx1t1                  | PSR0400000790.mm.1 | -2,62 | 0,008882 | 0,410619 Cassette Exon       | 0,12 |
| TC0400000118.mm.1  | 2,43 Runx1t1                  | PSR0400000798.mm.1 | -2,69 | 0,04719  | 0,55807 Cassette Exon        | 0,06 |
| TC0400000118.mm.1  | 2,43 Runx1t1                  | JUC0400000394.mm.1 | -2,93 | 0,048276 | 0,560285                     |      |
| TC0400000118.mm.1  | 2,43 Runx1t1                  | PSR0400000793.mm.1 | -3,14 | 0,003667 | 0,357266 Cassette Exon       | 0,13 |
| TC0200005004.mm.1  | 2,64 Gm14278                  | PSR0200042759.mm.1 | -2,29 | 0,007982 | 0,403853 Cassette Exon       | 0,24 |
| TC0200005004.mm.1  | 2,64 Gm14278                  | PSR0200042755.mm.1 | -2,8  | 0,015796 | 0,455748 Cassette Exon       | 0,17 |
| TC0200005004.mm.1  | 2,64 Gm14278                  | PSR0200042752.mm.1 | -3,35 | 0,018459 | 0,468671 Cassette Exon       | 0,24 |
| TC0200005004.mm.1  | 2,64 Gm14278                  | JUC0200022051.mm.1 | -3,77 | 0,027463 | 0,504045                     |      |
| TC0200005004.mm.1  | 2,64 Gm14278                  | JUC0200022041.mm.1 | -5,41 | 0,024248 | 0,493315                     |      |
| TC0200001203.mm.1  | -1,24 Itgav                   | PSR0200009631.mm.1 | -2,29 | 0,031775 | 0,517574 Intron Retention    | 0,23 |
| TC1600000071.mm.1  | 1,73                          | PSR1600000545.mm.1 | -2,29 | 0,000439 | 0,297771 Cassette Exon       | 0,22 |
| TC1600000071.mm.1  | 1,73                          | JUC1600000280.mm.1 | -3,16 | 0,041631 | 0,545202                     |      |
| TC0400004003.mm.1  | 1,43 Mfn2                     | PSR0400033022.mm.1 | -2,29 | 0,035633 | 0,528956 Alternative 3' Acce | 0,19 |
| TC0800001242.mm.1  | -1,49 1810019D21Rik           | PSR0800009963.mm.1 | -2,29 | 0,010527 | 0,422224 Alternative 5' Donc | 0,18 |
| TC1600000119.mm.1  | 1,8                           | PSR1600000877.mm.1 | -2,29 | 0,040054 | 0,541347 Cassette Exon       | 0,16 |
| TC0200003005.mm.1  | -1,08 Nsun6                   | PSR0200024813.mm.1 | -2,29 | 0,036699 | 0,531756 Cassette Exon       | 0,14 |
| TC0400003828.mm.1  | 1,4 Ubxn10                    | PSR0400031564.mm.1 | -2,29 | 0,034904 | 0,52699 Cassette Exon        | 0,14 |
| TC0500003264.mm.1  | 1,81 Ccdc92                   | PSR0500029496.mm.1 | -2,29 | 0,018777 | 0,470789 Cassette Exon       | 0,12 |
| TC0500003264.mm.1  | 1,81 Ccdc92                   | JUC0500016054.mm.1 | -3,04 | 0,013584 | 0,443703                     |      |
| TC1300001410.mm.1  | 1,67 Wdr37                    | PSR1300008849.mm.1 | -2,29 | 0,002528 | 0,349501 Alternative 3' Acce | 0,12 |
| TC1300001410.mm.1  | 1,67 Wdr37                    | JUC1300004594.mm.1 | -2,34 | 0,006851 | 0,393893                     |      |
| TC1300001410.mm.1  | 1,67 Wdr37                    | JUC1300004597.mm.1 | -5,34 | 0,000952 | 0,313363                     |      |
| TC0200002489.mm.1  | -1,08 Hnf4a                   | JUC0200010329.mm.1 | -2,29 | 0,028911 | 0,50858                      |      |
| TC0200005013.mm.1  | -1,44 Samhd1                  | JUC0200022121.mm.1 | -2,29 | 0,016989 | 0,461482                     |      |
| TC1300000763.mm.1  | 1,17 2010111I01Rik; Mir23b; N | JUC1300002652.mm.1 | -2,29 | 0,014115 | 0,447137                     |      |
| TC1700001456.mm.1  | -1,17 Pnlcd1                  | JUC1700007106.mm.1 | -2,29 | 0,018868 | 0,471099                     |      |
| TC1700001585.mm.1  | 1,46 Zfp40                    | JUC1700007526.mm.1 | -2,29 | 0,039268 | 0,538976                     |      |
| TC1700002797.mm.1  | 1,31 Traf7                    | JUC1700007912.mm.1 | -2,29 | 0,007297 | 0,398847                     |      |
| TC1800001269.mm.1  | 1,88 Dpysl3; LOC100862305     | JUC1800005258.mm.1 | -2,29 | 0,037846 | 0,534803                     |      |
| TC1500000526.mm.1  | 1,07 Gm6569                   | JUC1500002163.mm.1 | -2,29 | 0,007398 | 0,399712                     |      |
| TC1500000526.mm.1  | 1,07 Gm6569                   | JUC1500002164.mm.1 | -3,07 | 0,00251  | 0,349237                     |      |
| TC0900001197.mm.1  | 1,2                           | JUC0900005108.mm.1 | -2,29 | 0,023375 | 0,490143                     |      |
| TC0700001000.mm.1  | -1,13 Adamts17                | JUC0700004728.mm.1 | -2,29 | 0,025872 | 0,498858                     |      |
| TC0700001000.mm.1  | -1,13 Adamts17                | JUC0700004708.mm.1 | -3    | 0,037149 | 0,533065                     |      |
| TC0600001344.mm.1  | 1,33 Kdm5a                    | JUC0600005581.mm.1 | -2,29 | 0,002362 | 0,34829                      |      |

|                   |               |                    |       |          |                              |      |
|-------------------|---------------|--------------------|-------|----------|------------------------------|------|
| TC0600001344.mm.1 | 1,33 Kdm5a    | JUC0600005585.mm.1 | -4,33 | 0,004837 | 0,371624                     |      |
| TC0700001385.mm.1 | 1,17 Gdpd5    | JUC0700006077.mm.1 | -2,29 | 0,046259 | 0,556176                     |      |
| TC0900001846.mm.1 | -1,11 Col5a3  | JUC0900008691.mm.1 | -2,29 | 0,005998 | 0,386404                     |      |
| TC0900001846.mm.1 | -1,11 Col5a3  | JUC0900008703.mm.1 | -4,3  | 0,04319  | 0,548921                     |      |
| TC0300003223.mm.1 | 1,11 Pmp2     | JUC0300006896.mm.1 | -2,29 | 0,030985 | 0,514765                     |      |
| TC1000000653.mm.1 | 1,07 Tmem26   | JUC1000002423.mm.1 | -2,29 | 0,021498 | 0,482708                     |      |
| TC0500001260.mm.1 | 6,66 Msi1     | JUC0500005934.mm.1 | -2,3  | 0,007694 | 0,402552                     |      |
| TC0500001260.mm.1 | 6,66 Msi1     | PSR0500010876.mm.1 | -2,52 | 0,007519 | 0,401141 Cassette Exon       | 0,27 |
| TC0500001260.mm.1 | 6,66 Msi1     | JUC0500005919.mm.1 | -3,01 | 0,015405 | 0,453973                     |      |
| TC0500001260.mm.1 | 6,66 Msi1     | JUC0500005920.mm.1 | -3,03 | 0,008716 | 0,409276                     |      |
| TC0500001260.mm.1 | 6,66 Msi1     | JUC0500005935.mm.1 | -3,06 | 0,01072  | 0,423723                     |      |
| TC0500001260.mm.1 | 6,66 Msi1     | JUC0500005937.mm.1 | -3,23 | 0,017573 | 0,464258                     |      |
| TC0500001260.mm.1 | 6,66 Msi1     | PSR0500010862.mm.1 | -3,31 | 0,00742  | 0,399901 Cassette Exon       | 0,31 |
| TC0500001260.mm.1 | 6,66 Msi1     | PSR0500010873.mm.1 | -3,46 | 0,018244 | 0,467812 Alternative 5' Donc | 0,23 |
| TC0500001260.mm.1 | 6,66 Msi1     | PSR0500010874.mm.1 | -3,76 | 0,004911 | 0,372662 Cassette Exon       | 0,3  |
| TC0500001260.mm.1 | 6,66 Msi1     | PSR0500010871.mm.1 | -4,13 | 0,006467 | 0,390452 Alternative 5' Donc | 0,5  |
| TC0500001260.mm.1 | 6,66 Msi1     | JUC0500005932.mm.1 | -5,23 | 0,002953 | 0,352501                     |      |
| TC0500001260.mm.1 | 6,66 Msi1     | PSR0500010879.mm.1 | -5,47 | 0,003825 | 0,358333 Cassette Exon       | 0,27 |
| TC0500001260.mm.1 | 6,66 Msi1     | PSR0500010861.mm.1 | -6,72 | 0,006214 | 0,387912 Cassette Exon       | 0,41 |
| TC0500001260.mm.1 | 6,66 Msi1     | PSR0500010858.mm.1 | -6,83 | 0,010979 | 0,42525 Cassette Exon        | 0,37 |
| TC0500001260.mm.1 | 6,66 Msi1     | PSR0500010865.mm.1 | -6,93 | 0,004219 | 0,363236 Alternative 5' Donc | 0,48 |
| TC0500001260.mm.1 | 6,66 Msi1     | PSR0500010850.mm.1 | -7,39 | 0,003336 | 0,354243 Cassette Exon       | 0,37 |
| TC0500001260.mm.1 | 6,66 Msi1     | PSR0500010883.mm.1 | -7,59 | 0,005073 | 0,37524 Alternative 5' Donc  | 0,45 |
| TC0500001260.mm.1 | 6,66 Msi1     | JUC0500005936.mm.1 | -7,71 | 0,005399 | 0,378916                     |      |
| TC0500001260.mm.1 | 6,66 Msi1     | PSR0500010848.mm.1 | -9,3  | 0,004163 | 0,3623 Cassette Exon         | 0,37 |
| TC0600003383.mm.1 | 4,04 St8sia1  | PSR0600026686.mm.1 | -2,3  | 0,011112 | 0,426 Cassette Exon          | 0,26 |
| TC0600003383.mm.1 | 4,04 St8sia1  | JUC0600013979.mm.1 | -2,91 | 0,019786 | 0,475149                     |      |
| TC0600003383.mm.1 | 4,04 St8sia1  | PSR0600026687.mm.1 | -3,61 | 0,000645 | 0,304044 Cassette Exon       | 0,38 |
| TC0600003383.mm.1 | 4,04 St8sia1  | JUC0600013980.mm.1 | -5,22 | 0,004443 | 0,367065                     |      |
| TC0200004245.mm.1 | 1,36 Tcp1111  | JUC0200018277.mm.1 | -2,3  | 0,032714 | 0,520439                     |      |
| TC0200004245.mm.1 | 1,36 Tcp1111  | PSR0200035735.mm.1 | -2,84 | 0,008828 | 0,410293 Cassette Exon       | 0,17 |
| TC0200004245.mm.1 | 1,36 Tcp1111  | PSR0200035745.mm.1 | -3,31 | 0,012365 | 0,434849 Alternative 3' Acce | 0,37 |
| TC0500003271.mm.1 | 2,45 Scarb1   | JUC0500016135.mm.1 | -2,3  | 0,002847 | 0,352207                     |      |
| TC0500003271.mm.1 | 2,45 Scarb1   | PSR0500029587.mm.1 | -2,33 | 0,008925 | 0,410972 Cassette Exon       | 0,15 |
| TC0500003271.mm.1 | 2,45 Scarb1   | JUC0500016139.mm.1 | -2,39 | 0,007938 | 0,403819                     |      |
| TC0500003271.mm.1 | 2,45 Scarb1   | PSR0500029595.mm.1 | -2,46 | 0,025221 | 0,496772 Alternative 5' Donc | 0,16 |
| TC0500003271.mm.1 | 2,45 Scarb1   | PSR0500029614.mm.1 | -2,55 | 0,003157 | 0,353892 Cassette Exon       | 0,07 |
| TC0500003271.mm.1 | 2,45 Scarb1   | JUC0500016138.mm.1 | -3,05 | 0,01311  | 0,439759                     |      |
| TC0500003271.mm.1 | 2,45 Scarb1   | PSR0500029613.mm.1 | -3,16 | 0,029947 | 0,511499 Alternative 3' Acce | 0,1  |
| TC0500003271.mm.1 | 2,45 Scarb1   | PSR0500029616.mm.1 | -3,18 | 0,006086 | 0,386691 Cassette Exon       | 0,29 |
| TC0400003360.mm.1 | 1,01 Btbd19   | PSR0400026875.mm.1 | -2,3  | 0,040936 | 0,543423 Intron Retention    | 0,27 |
| TC0300002297.mm.1 | -1,09 Apoa1bp | PSR0300017373.mm.1 | -2,3  | 0,027376 | 0,503961 Cassette Exon       | 0,21 |
| TC0300002297.mm.1 | -1,09 Apoa1bp | JUC0300009136.mm.1 | -2,31 | 0,000658 | 0,304044                     |      |
| TC1700001017.mm.1 | 1,57 Dus3l    | JUC1700005234.mm.1 | -2,3  | 0,014513 | 0,449545                     |      |
| TC1700001017.mm.1 | 1,57 Dus3l    | PSR1700009794.mm.1 | -2,37 | 0,015843 | 0,456278 Alternative 3' Acce | 0,21 |
| TC0100002777.mm.1 | -1,07         | PSR0100022462.mm.1 | -2,3  | 0,039522 | 0,539762 Alternative 3' Acce | 0,2  |
| TC0400000934.mm.1 | 1,24 Gm12637  | PSR0400006220.mm.1 | -2,3  | 0,021159 | 0,480937 Alternative 5' Donc | 0,2  |
| TC0300001176.mm.1 | 1,78 Olfm3    | PSR0300009652.mm.1 | -2,3  | 0,008449 | 0,406611 Alternative 3' Acce | 0,13 |

|                   |                       |                    |       |          |                              |      |
|-------------------|-----------------------|--------------------|-------|----------|------------------------------|------|
| TC0300001176.mm.1 | 1,78 Olfm3            | PSR0300009656.mm.1 | -2,61 | 0,01223  | 0,433556 Cassette Exon       | 0,15 |
| TC0700003767.mm.1 | 1,26 Gm15623; Rsf1os2 | PSR0700031706.mm.1 | -2,3  | 0,01828  | 0,468049 Cassette Exon       | 0,13 |
| TC0400002066.mm.1 | 1,48 Morn1            | PSR0400017073.mm.1 | -2,3  | 0,044342 | 0,551418 Cassette Exon       | 0,12 |
| TC1600000041.mm.1 | 1,08                  | PSR1600000365.mm.1 | -2,3  | 0,00581  | 0,383104 Cassette Exon       | 0,12 |
| TC1800001603.mm.1 | 1,94 Ctif             | PSR1800011588.mm.1 | -2,3  | 0,006031 | 0,386586 Cassette Exon       | 0,12 |
| TC0200003561.mm.1 | -1,57                 | PSR0200030359.mm.1 | -2,3  | 0,046965 | 0,557563 Alternative 3' Acce | 0,12 |
| TC1000000598.mm.1 | 1,38 Herc4            | PSR1000004117.mm.1 | -2,3  | 0,003019 | 0,353447 Alternative 3' Acce | 0,11 |
| TC0200003424.mm.1 | 1,34 Nr6a1            | JUC0200014823.mm.1 | -2,3  | 0,015872 | 0,456526                     |      |
| TC0200003137.mm.1 | -1,21 Slc34a3         | JUC0200013035.mm.1 | -2,3  | 0,024899 | 0,495661                     |      |
| TC0200003137.mm.1 | -1,21 Slc34a3         | JUC0200013047.mm.1 | -2,75 | 0,032866 | 0,521098                     |      |
| TC0200003215.mm.1 | -1,28 Vav2            | JUC0200013703.mm.1 | -2,3  | 0,003826 | 0,358339                     |      |
| TC0300000750.mm.1 | 1,36 Gba              | JUC0300002977.mm.1 | -2,3  | 0,002218 | 0,345773                     |      |
| TC0200004941.mm.1 | 1,35 Necab3           | JUC0200021634.mm.1 | -2,3  | 0,003611 | 0,356223                     |      |
| TC0200004941.mm.1 | 1,35 Necab3           | JUC0200021633.mm.1 | -2,59 | 0,02245  | 0,487003                     |      |
| TC0200004941.mm.1 | 1,35 Necab3           | JUC0200021635.mm.1 | -3,14 | 0,024882 | 0,49558                      |      |
| TC1300000418.mm.1 | -1,27                 | JUC1300001272.mm.1 | -2,3  | 0,022104 | 0,485486                     |      |
| TC1700001270.mm.1 | 1,34 Camkmt           | JUC1700006434.mm.1 | -2,3  | 0,013861 | 0,445426                     |      |
| TC1700001674.mm.1 | 1,13 Metrnl           | JUC1700008334.mm.1 | -2,3  | 0,049233 | 0,562541                     |      |
| TC0200002429.mm.1 | 1,12 Ralgapb          | JUC0200009990.mm.1 | -2,3  | 0,020162 | 0,477086                     |      |
| TC1600001922.mm.1 | -1,33 Nrip1           | JUC1600007733.mm.1 | -2,3  | 0,009194 | 0,413763                     |      |
| TC0900000590.mm.1 | 1,17 Zw10             | JUC0900002163.mm.1 | -2,3  | 0,01272  | 0,43654                      |      |
| TC0700000138.mm.1 | 1,24 Zfp606           | JUC0700000517.mm.1 | -2,3  | 0,007919 | 0,403819                     |      |
| TC1100000011.mm.1 | 1,28 8430429K09Rik    | JUC1100000081.mm.1 | -2,3  | 0,005424 | 0,379427                     |      |
| TC1100000011.mm.1 | 1,28 8430429K09Rik    | JUC1100000083.mm.1 | -2,3  | 0,039581 | 0,539856                     |      |
| TC1100000011.mm.1 | 1,28 8430429K09Rik    | JUC1100000088.mm.1 | -2,78 | 0,003817 | 0,358136                     |      |
| TC1100000011.mm.1 | 1,28 8430429K09Rik    | JUC1100000086.mm.1 | -3,38 | 0,001065 | 0,316361                     |      |
| TC0300002580.mm.1 | 1,23 Wdr3             | JUC0300010464.mm.1 | -2,3  | 0,022613 | 0,487423                     |      |
| TC0900003157.mm.1 | -1,22 AU023762        | JUC0900014997.mm.1 | -2,3  | 0,044419 | 0,551557                     |      |
| TC0X00002851.mm.1 | -1,01 Brwd3           | JUC0X00009195.mm.1 | -2,3  | 0,038329 | 0,53622                      |      |
| TC1300000148.mm.1 | 4,89 Elmo1            | PSR1300001032.mm.1 | -2,31 | 0,012376 | 0,434939 Cassette Exon       | 0,13 |
| TC1300000148.mm.1 | 4,89 Elmo1            | PSR1300001027.mm.1 | -2,88 | 0,027236 | 0,503642 Cassette Exon       | 0,33 |
| TC1300000148.mm.1 | 4,89 Elmo1            | PSR1300001007.mm.1 | -3,54 | 0,0257   | 0,498173 Cassette Exon       | 0,26 |
| TC1300000148.mm.1 | 4,89 Elmo1            | PSR1300001015.mm.1 | -3,61 | 0,02088  | 0,479589 Cassette Exon       | 0,53 |
| TC1300000148.mm.1 | 4,89 Elmo1            | JUC1300000585.mm.1 | -4,05 | 0,043867 | 0,550524                     |      |
| TC1300000148.mm.1 | 4,89 Elmo1            | PSR1300001025.mm.1 | -4,29 | 0,035565 | 0,528805 Cassette Exon       | 0,55 |
| TC1300000148.mm.1 | 4,89 Elmo1            | PSR1300001019.mm.1 | -4,63 | 0,005492 | 0,379939 Cassette Exon       | 0,55 |
| TC1300000148.mm.1 | 4,89 Elmo1            | PSR1300001008.mm.1 | -4,66 | 0,003631 | 0,3566 Cassette Exon         | 0,28 |
| TC1300000148.mm.1 | 4,89 Elmo1            | PSR1300001005.mm.1 | -4,92 | 0,006752 | 0,393343 Cassette Exon       | 0,26 |
| TC1300000148.mm.1 | 4,89 Elmo1            | PSR1300001021.mm.1 | -5,07 | 0,00912  | 0,413305 Cassette Exon       | 0,41 |
| TC1300000148.mm.1 | 4,89 Elmo1            | JUC1300000593.mm.1 | -5,46 | 0,010713 | 0,423598                     |      |
| TC1300000148.mm.1 | 4,89 Elmo1            | PSR1300001012.mm.1 | -5,71 | 0,003357 | 0,354243 Cassette Exon       | 0,55 |
| TC1300000148.mm.1 | 4,89 Elmo1            | PSR1300001028.mm.1 | -5,88 | 0,004938 | 0,373093 Alternative 3' Acce | 0,48 |
| TC1300000148.mm.1 | 4,89 Elmo1            | JUC1300000599.mm.1 | -5,97 | 0,003594 | 0,356223                     |      |
| TC1300000148.mm.1 | 4,89 Elmo1            | PSR1300001020.mm.1 | -6,06 | 0,019811 | 0,475266 Cassette Exon       | 0,55 |
| TC1300000148.mm.1 | 4,89 Elmo1            | PSR1300001010.mm.1 | -6,16 | 0,012806 | 0,437316 Cassette Exon       | 0,55 |
| TC1300000148.mm.1 | 4,89 Elmo1            | JUC1300000597.mm.1 | -6,34 | 0,004508 | 0,368648                     |      |
| TC1300000148.mm.1 | 4,89 Elmo1            | PSR1300001013.mm.1 | -6,39 | 0,008768 | 0,409781 Cassette Exon       | 0,55 |
| TC1300000148.mm.1 | 4,89 Elmo1            | JUC1300000590.mm.1 | -6,45 | 0,003671 | 0,357266                     |      |



|                   |       |                                    |                            |        |          |          |                     |      |
|-------------------|-------|------------------------------------|----------------------------|--------|----------|----------|---------------------|------|
| TC1300000148.mm.1 | 4,89  | Elmo1                              | PSR1300001022.mm.1         | -6,58  | 0,006144 | 0,387745 | Cassette Exon       | 0,41 |
| TC1300000148.mm.1 | 4,89  | Elmo1                              | PSR1300001014.mm.1         | -6,6   | 0,004845 | 0,37168  | Cassette Exon       | 0,55 |
| TC1300000148.mm.1 | 4,89  | Elmo1                              | JUC1300000589.mm.1         | -6,75  | 0,004226 | 0,363295 |                     |      |
| TC1300000148.mm.1 | 4,89  | Elmo1                              | PSR1300001018.mm.1         | -7,06  | 0,002527 | 0,349501 | Cassette Exon       | 0,55 |
| TC1300000148.mm.1 | 4,89  | Elmo1                              | JUC1300000591.mm.1         | -7,46  | 0,003616 | 0,356223 |                     |      |
| TC1300000148.mm.1 | 4,89  | Elmo1                              | JUC1300000587.mm.1         | -7,61  | 0,005667 | 0,381922 |                     |      |
| TC1300000148.mm.1 | 4,89  | Elmo1                              | PSR1300001009.mm.1         | -7,78  | 0,009864 | 0,417945 | Cassette Exon       | 0,41 |
| TC1300000148.mm.1 | 4,89  | Elmo1                              | PSR1300001024.mm.1         | -7,81  | 0,002849 | 0,352207 | Cassette Exon       | 0,55 |
| TC1300000148.mm.1 | 4,89  | Elmo1                              | PSR1300001026.mm.1         | -7,95  | 0,015081 | 0,452418 | Cassette Exon       | 0,43 |
| TC1300000148.mm.1 | 4,89  | Elmo1                              | JUC1300000594.mm.1         | -8,78  | 0,010726 | 0,423745 |                     |      |
| TC1300000148.mm.1 | 4,89  | Elmo1                              | JUC1300000586.mm.1         | -9,08  | 0,007932 | 0,403819 |                     |      |
| TC1300000148.mm.1 | 4,89  | Elmo1                              | PSR1300001023.mm.1         | -9,16  | 0,012009 | 0,432286 | Cassette Exon       | 0,41 |
| TC1300000148.mm.1 | 4,89  | Elmo1                              | PSR1300001011.mm.1         | -9,21  | 0,010754 | 0,423859 | Cassette Exon       | 0,55 |
| TC1300000148.mm.1 | 4,89  | Elmo1                              | PSR1300001017.mm.1         | -9,51  | 0,014313 | 0,448078 | Cassette Exon       | 0,55 |
| TC1300000148.mm.1 | 4,89  | Elmo1                              | JUC1300000592.mm.1         | -10,83 | 0,007873 | 0,403545 |                     |      |
| TC1300000148.mm.1 | 4,89  | Elmo1                              | JUC1300000596.mm.1         | -10,94 | 0,00251  | 0,349237 |                     |      |
| TC1300000148.mm.1 | 4,89  | Elmo1                              | JUC1300000588.mm.1         | -12,31 | 0,012798 | 0,437255 |                     |      |
| TC0900003112.mm.1 | 5,78  | Klhl18                             | PSR0900026296.mm.1         | -2,31  | 0,046443 | 0,556547 | Cassette Exon       | 0,21 |
| TC0900003112.mm.1 | 5,78  | Klhl18                             | JUC0900014763.mm.1         | -3,16  | 0,015214 | 0,45279  |                     |      |
| TC0900003112.mm.1 | 5,78  | Klhl18                             | PSR0900026303.mm.1         | -5,03  | 0,011434 | 0,427663 | Alternative 5' Donc | 0,39 |
| TC0900000252.mm.1 | 1,93  | B3gat1                             | PSR0900001871.mm.1         | -2,31  | 0,041322 | 0,544282 | Intron Retention    | 0,32 |
| TC0900000252.mm.1 | 1,93  | B3gat1                             | JUC0900001009.mm.1         | -3,51  | 0,00057  | 0,382524 |                     |      |
| TC1600001665.mm.1 | 1,46  | Abhd10                             | JUC1600007108.mm.1         | -2,31  | 0,015725 | 0,455416 |                     |      |
| TC1600001665.mm.1 | 1,46  | Abhd10                             | PSR1600013633.mm.1         | -3,12  | 0,020567 | 0,478392 | Intron Retention    | 0,28 |
| TC0800000973.mm.1 | 8,49  | Rtbdn                              | PSR0800007380.mm.1         | -2,31  | 0,038472 | 0,536441 | Alternative 3' Acce | 0,13 |
| TC0800000973.mm.1 | 8,49  | Rtbdn                              | PSR0800007384.mm.1         | -2,49  | 0,009034 | 0,412736 | Alternative 3' Acce | 0,27 |
| TC1200001676.mm.1 | 2,35  | Lrrn3                              | PSR1200011634.mm.1         | -2,31  | 0,024951 | 0,495859 | Cassette Exon       | 0,1  |
| TC1200001676.mm.1 | 2,35  | Lrrn3                              | PSR1200011631.mm.1         | -4,06  | 0,002933 | 0,352289 | Cassette Exon       | 0,27 |
| TC0700001989.mm.1 | 1,32  | Lrrc27                             | PSR0700017428.mm.1         | -2,31  | 0,029817 | 0,511132 | Alternative 3' Acce | 0,18 |
| TC0700001989.mm.1 | 1,32  | Lrrc27                             | JUC0700009254.mm.1         | -3,53  | 0,037681 | 0,534394 |                     |      |
| TC0700001989.mm.1 | 1,32  | Lrrc27                             | PSR0700017427.mm.1         | -3,6   | 0,003235 | 0,354243 | Cassette Exon       | 0,24 |
| TC1700002230.mm.1 | -1,01 |                                    | PSR1700021084.mm.1         | -2,31  | 0,00072  | 0,306015 | Alternative 5' Donc | 0,21 |
| TC0100003279.mm.1 | 1,39  | Dhx9                               | PSR0100026681.mm.1         | -2,31  | 0,005525 | 0,380518 | Intron Retention    | 0,18 |
| TC1800000944.mm.1 | 1,27  | Arhgap12                           | PSR1800006892.mm.1         | -2,31  | 0,021011 | 0,480143 | Alternative 3' Acce | 0,17 |
| TC1800000944.mm.1 | 1,27  | Arhgap12                           | JUC1800003819.mm.1         | -2,74  | 0,012155 | 0,432923 |                     |      |
| TC0X00002053.mm.1 | 1,77  |                                    | sept-06 JUC0X00006649.mm.1 | -2,31  | 0,03225  | 0,519011 |                     |      |
| TC0X00002053.mm.1 | 1,77  |                                    | sept-06 PSR0X00013038.mm.1 | -2,61  | 0,01257  | 0,435818 | Cassette Exon       | 0,15 |
| TC0X00000061.mm.1 | -1,16 | Prickle3                           | PSR0X00000326.mm.1         | -2,31  | 0,022947 | 0,488667 | Cassette Exon       | 0,12 |
| TC0X00000094.mm.1 | -1,32 | Gm6592                             | PSR0X00000750.mm.1         | -2,31  | 0,007661 | 0,402377 | Cassette Exon       | 0,12 |
| TC1400001661.mm.1 | -1,4  | Itih3                              | JUC1400006812.mm.1         | -2,31  | 0,01148  | 0,428022 |                     |      |
| TC1300001680.mm.1 | 1,02  | 1700092E19Rik                      | JUC1300005351.mm.1         | -2,31  | 0,020301 | 0,477245 |                     |      |
| TC0100002954.mm.1 | 1,59  | Ptpn4                              | JUC0100013492.mm.1         | -2,31  | 0,044049 | 0,550824 |                     |      |
| TC1900001552.mm.1 | 1,52  | Chuk                               | JUC1900007601.mm.1         | -2,31  | 0,015754 | 0,455437 |                     |      |
| TC0200000719.mm.1 | 1,07  | Arpc5l                             | JUC0200003207.mm.1         | -2,31  | 0,025685 | 0,498173 |                     |      |
| TC1600000664.mm.1 | -1,13 | Cd200r4                            | JUC1600003032.mm.1         | -2,31  | 0,042743 | 0,548097 |                     |      |
| TC0500001448.mm.1 | 1,46  | Ddx55                              | JUC0500007118.mm.1         | -2,31  | 0,047583 | 0,558743 |                     |      |
| TC0600003496.mm.1 | -1,14 | Trbj1-1; Trbj1-2; Trbj1-3; Trbj1-4 | JUC0600001725.mm.1         | -2,31  | 0,020909 | 0,479756 |                     |      |
| TC0300001475.mm.1 | 1,18  | Odf2l                              | JUC0300006230.mm.1         | -2,31  | 0,044963 | 0,552881 |                     |      |

|                   |                     |                    |       |          |                              |      |
|-------------------|---------------------|--------------------|-------|----------|------------------------------|------|
| TC0Y00000380.mm.1 | -1,02 Orly          | JUC0Y00001637.mm.1 | -2,31 | 0,000806 | 0,311765                     |      |
| TC0Y00000389.mm.1 | -1,02 Orly          | JUC0Y00001644.mm.1 | -2,31 | 0,000806 | 0,311765                     |      |
| TC1000001063.mm.1 | -1,17 Pah           | JUC1000004306.mm.1 | -2,31 | 0,006889 | 0,394489                     |      |
| TC1300001266.mm.1 | 1,96 Slc38a9        | PSR1300008037.mm.1 | -2,32 | 0,023272 | 0,49004 Alternative 5' Donc  | 0,21 |
| TC1300001266.mm.1 | 1,96 Slc38a9        | PSR1300008036.mm.1 | -2,35 | 0,010348 | 0,421002 Alternative 5' Donc | 0,21 |
| TC1300001266.mm.1 | 1,96 Slc38a9        | JUC1300004190.mm.1 | -3,32 | 0,044093 | 0,550916                     |      |
| TC1300001266.mm.1 | 1,96 Slc38a9        | PSR1300008018.mm.1 | -3,52 | 0,005376 | 0,378747 Alternative 3' Acce | 0,4  |
| TC0300001322.mm.1 | 1,89 Etnppl         | PSR0300010707.mm.1 | -2,32 | 0,035069 | 0,527574 Intron Retention    | 0,33 |
| TC0300001322.mm.1 | 1,89 Etnppl         | JUC0300005612.mm.1 | -2,87 | 0,01172  | 0,429969                     |      |
| TC0400000774.mm.1 | 3,42 Frmd3          | PSR0400005479.mm.1 | -2,32 | 0,007718 | 0,402552 Cassette Exon       | 0,17 |
| TC0400000774.mm.1 | 3,42 Frmd3          | PSR0400005478.mm.1 | -2,36 | 0,000287 | 0,28803 Cassette Exon        | 0,15 |
| TC0400000774.mm.1 | 3,42 Frmd3          | PSR0400005473.mm.1 | -2,45 | 0,023728 | 0,491556 Alternative 3' Acce | 0,23 |
| TC0400000774.mm.1 | 3,42 Frmd3          | PSR0400005457.mm.1 | -2,75 | 0,005952 | 0,385276 Alternative 3' Acce | 0,23 |
| TC0400000774.mm.1 | 3,42 Frmd3          | PSR0400005456.mm.1 | -3,17 | 0,007711 | 0,402552 Alternative 3' Acce | 0,23 |
| TC0400000774.mm.1 | 3,42 Frmd3          | PSR0400005463.mm.1 | -3,26 | 0,009221 | 0,41411 Alternative 3' Acce  | 0,31 |
| TC0700003107.mm.1 | 3,7 Gabrg3          | PSR0700028193.mm.1 | -2,32 | 0,018966 | 0,471398 Cassette Exon       | 0,12 |
| TC0700003107.mm.1 | 3,7 Gabrg3          | PSR0700028198.mm.1 | -3,9  | 0,03029  | 0,512627 Cassette Exon       | 0,3  |
| TC1500001846.mm.1 | 2,72 Elfn2          | JUC1500008211.mm.1 | -2,32 | 0,0311   | 0,515257                     |      |
| TC1500001846.mm.1 | 2,72 Elfn2          | PSR1500014400.mm.1 | -3,29 | 0,002887 | 0,352207 Cassette Exon       | 0,12 |
| TC1500001846.mm.1 | 2,72 Elfn2          | PSR1500014401.mm.1 | -3,49 | 0,005476 | 0,379939 Cassette Exon       | 0,29 |
| TC0300002711.mm.1 | 1,75 Slc6a17        | JUC0300010980.mm.1 | -2,32 | 0,032051 | 0,518459                     |      |
| TC0300002711.mm.1 | 1,75 Slc6a17        | JUC0300010968.mm.1 | -2,36 | 0,018424 | 0,468579                     |      |
| TC0300002711.mm.1 | 1,75 Slc6a17        | PSR0300021083.mm.1 | -3,64 | 0,002246 | 0,34578 Alternative 3' Acce  | 0,26 |
| TC1100002004.mm.1 | 1,18 Endov          | PSR1100019210.mm.1 | -2,32 | 0,044502 | 0,551748 Alternative 5' Donc | 0,18 |
| TC1100002004.mm.1 | 1,18 Endov          | PSR1100019231.mm.1 | -2,51 | 0,007463 | 0,400381 Alternative 5' Donc | 0,24 |
| TC1500000297.mm.1 | 2,34 Baalc          | JUC1500001235.mm.1 | -2,32 | 0,01521  | 0,452773                     |      |
| TC1500000297.mm.1 | 2,34 Baalc          | PSR1500002133.mm.1 | -2,52 | 0,004865 | 0,371692 Alternative 5' Donc | 0,24 |
| TC1500000297.mm.1 | 2,34 Baalc          | PSR1500002125.mm.1 | -2,54 | 0,015613 | 0,455082 Cassette Exon       | 0,2  |
| TC0200004507.mm.1 | -1,5 Duoxa1         | PSR0200038300.mm.1 | -2,32 | 0,034359 | 0,525572 Alternative 3' Acce | 0,21 |
| TC0700004644.mm.1 | 1,32 Zfp82          | PSR0700024281.mm.1 | -2,32 | 0,041853 | 0,545612 Alternative 5' Donc | 0,21 |
| TC0600000698.mm.1 | 1,25 Lancl2         | PSR0600005380.mm.1 | -2,32 | 0,013003 | 0,439291 Alternative 3' Acce | 0,2  |
| TC1200002037.mm.1 | 1,29 1700085C21Rik  | PSR1200014012.mm.1 | -2,32 | 0,039841 | 0,540922 Cassette Exon       | 0,2  |
| TC1200002037.mm.1 | 1,29 1700085C21Rik  | JUC1200007714.mm.1 | -2,65 | 0,038675 | 0,537102                     |      |
| TC1500002118.mm.1 | 1,94 Nell2          | PSR1500017041.mm.1 | -2,32 | 0,025848 | 0,498657 Cassette Exon       | 0,18 |
| TC1500002118.mm.1 | 1,94 Nell2          | JUC1500009699.mm.1 | -4,6  | 0,003887 | 0,359225                     |      |
| TC0800000796.mm.1 | 1,49 Slc27a1        | PSR0800005743.mm.1 | -2,32 | 0,002902 | 0,352207 Cassette Exon       | 0,14 |
| TC1100004222.mm.1 | 1,13 Pycr1          | PSR1100040373.mm.1 | -2,32 | 0,009277 | 0,414799 Alternative 3' Acce | 0,14 |
| TC0900002179.mm.1 | 1,27 Tmem25         | PSR0900018131.mm.1 | -2,32 | 0,012777 | 0,437233 Cassette Exon       | 0,13 |
| TC0300002219.mm.1 | 3,63 Gucy1b3        | PSR0300016684.mm.1 | -2,32 | 0,007117 | 0,397044 Cassette Exon       | 0,12 |
| TC0X00001787.mm.1 | 1,42 Hdac6          | PSR0X00011355.mm.1 | -2,32 | 0,040945 | 0,543423 Alternative 3' Acce | 0,12 |
| TC1100003221.mm.1 | 1,09 Rpa1           | PSR1100029628.mm.1 | -2,32 | 0,024074 | 0,49304 Cassette Exon        | 0,12 |
| TC0200003046.mm.1 | 1,01 Gm20539        | PSR0200025054.mm.1 | -2,32 | 0,044295 | 0,551351 Cassette Exon       | 0,1  |
| TC0400004042.mm.1 | 1,36 Nmnat1         | PSR0400033591.mm.1 | -2,32 | 0,049983 | 0,564085 Cassette Exon       | 0,1  |
| TC1400001856.mm.1 | -1,09 1700001F09Rik | JUC1400007740.mm.1 | -2,32 | 0,002578 | 0,349501                     |      |
| TC0300001055.mm.1 | 1,42 Syt6           | JUC0300004412.mm.1 | -2,32 | 0,00777  | 0,402804                     |      |
| TC1200000204.mm.1 | 1,06                | JUC1200000930.mm.1 | -2,32 | 0,03507  | 0,527574                     |      |
| TC1300000382.mm.1 | 1,16 1110046J04Rik  | JUC1300001158.mm.1 | -2,32 | 0,009847 | 0,417839                     |      |
| TC0100002273.mm.1 | -1,03               | JUC0100010384.mm.1 | -2,32 | 0,037024 | 0,532502                     |      |

|                   |                             |                    |        |          |          |                          |
|-------------------|-----------------------------|--------------------|--------|----------|----------|--------------------------|
| TC1900000612.mm.1 | 1,36 Zfyve27                | JUC1900002931.mm.1 | -2,32  | 0,002005 | 0,341091 |                          |
| TC1900000612.mm.1 | 1,36 Zfyve27                | JUC1900002933.mm.1 | -2,84  | 0,00467  | 0,370181 |                          |
| TC0200002261.mm.1 | 1,38 Nsf1c                  | JUC0200008892.mm.1 | -2,32  | 0,048997 | 0,561857 |                          |
| TC0500003286.mm.1 | -1,03 Tmem132d              | JUC0500016219.mm.1 | -2,32  | 0,028916 | 0,50858  |                          |
| TC0700001851.mm.1 | 1,29 Srcap                  | JUC0700008339.mm.1 | -2,32  | 0,019643 | 0,474876 |                          |
| TC0700001851.mm.1 | 1,29 Srcap                  | JUC0700008336.mm.1 | -3,19  | 0,041432 | 0,544646 |                          |
| TC1000002224.mm.1 | 2,13 Ddit4                  | JUC1000008460.mm.1 | -2,32  | 0,03158  | 0,517177 |                          |
| TC1100003652.mm.1 | 2,11 Pip4k2b                | JUC1100017585.mm.1 | -2,32  | 0,036875 | 0,532257 |                          |
| TC1100003674.mm.1 | 1,27 Pgap3                  | JUC1100017736.mm.1 | -2,32  | 0,021068 | 0,480303 |                          |
| TC0X00003438.mm.1 | 1,39 Zmat1                  | JUC0X00009499.mm.1 | -2,32  | 0,012581 | 0,435924 |                          |
| TC0500002578.mm.1 | 11,76 Cnga1                 | PSR0500022802.mm.1 | -2,33  | 0,00509  | 0,375607 | Cassette Exon 0,17       |
| TC0500002578.mm.1 | 11,76 Cnga1                 | PSR0500022799.mm.1 | -2,81  | 0,01019  | 0,419711 | Cassette Exon 0,44       |
| TC0500002578.mm.1 | 11,76 Cnga1                 | JUC0500012388.mm.1 | -4,14  | 0,007219 | 0,39826  |                          |
| TC0500002578.mm.1 | 11,76 Cnga1                 | JUC0500012391.mm.1 | -7,23  | 0,002754 | 0,350151 |                          |
| TC0500002578.mm.1 | 11,76 Cnga1                 | PSR0500022806.mm.1 | -9,83  | 0,00459  | 0,369794 | Cassette Exon 0,31       |
| TC0500002578.mm.1 | 11,76 Cnga1                 | JUC0500012387.mm.1 | -11,91 | 0,007948 | 0,403819 |                          |
| TC0500002578.mm.1 | 11,76 Cnga1                 | PSR0500022800.mm.1 | -15,69 | 0,002577 | 0,349501 | Cassette Exon 0,41       |
| TC0200004762.mm.1 | 1,81 Dzank1                 | PSR0200040798.mm.1 | -2,33  | 0,013939 | 0,446203 | Alternative 3' Acce 0,2  |
| TC0200004762.mm.1 | 1,81 Dzank1                 | PSR0200040774.mm.1 | -2,56  | 0,002501 | 0,349189 | Intron Retention 0,36    |
| TC0200004762.mm.1 | 1,81 Dzank1                 | JUC0200021138.mm.1 | -2,68  | 0,004392 | 0,366156 |                          |
| TC0200004762.mm.1 | 1,81 Dzank1                 | PSR0200040787.mm.1 | -3,89  | 0,001277 | 0,322251 | Alternative 3' Acce 0,37 |
| TC0X00000166.mm.1 | 1,33 Ddx3x                  | PSR0X00001066.mm.1 | -2,33  | 0,033333 | 0,522438 | Intron Retention 0,33    |
| TC0Y00000493.mm.1 | 1,42 Ssty2; Gm21257         | PSR0Y00002545.mm.1 | -2,33  | 0,028397 | 0,507058 | Alternative 3' Acce 0,21 |
| TC1500001051.mm.1 | -1,33 Dazap2; Gm2444        | PSR1500008315.mm.1 | -2,33  | 0,020125 | 0,47686  | Alternative 5' Donc 0,2  |
| TC1100003775.mm.1 | -1,32 Acly                  | PSR1100034709.mm.1 | -2,33  | 0,023199 | 0,490032 | Alternative 5' Donc 0,19 |
| TC1300000662.mm.1 | 1,37 Prr7                   | PSR1300004394.mm.1 | -2,33  | 0,012215 | 0,433321 | Alternative 5' Donc 0,19 |
| TC0X00003401.mm.1 | 2,13 Gprasp2                | PSR0X00008224.mm.1 | -2,33  | 0,017721 | 0,465209 | Alternative 3' Acce 0,11 |
| TC0X00003401.mm.1 | 2,13 Gprasp2                | PSR0X00008229.mm.1 | -2,45  | 0,013421 | 0,442624 | Intron Retention 0,18    |
| TC1500000766.mm.1 | 1 Serhl                     | PSR1500006034.mm.1 | -2,33  | 0,048324 | 0,560488 | Alternative 5' Donc 0,18 |
| TC0100002016.mm.1 | -1,47 Gm16070; LOC102634913 | PSR0100016473.mm.1 | -2,33  | 0,040332 | 0,541841 | Cassette Exon 0,12       |
| TC0200005462.mm.1 | -1,17 Entpd2                | PSR0200046644.mm.1 | -2,33  | 0,039332 | 0,539324 | Cassette Exon 0,11       |
| TC1200001236.mm.1 | -1,12 Exoc3l4               | JUC1200004772.mm.1 | -2,33  | 0,038693 | 0,537169 |                          |
| TC1200000659.mm.1 | 1,19                        | JUC1200002553.mm.1 | -2,33  | 0,019772 | 0,475054 |                          |
| TC0300000658.mm.1 | 1,42 Fbxw7                  | JUC0300002280.mm.1 | -2,33  | 0,012277 | 0,434165 |                          |
| TC1300001725.mm.1 | 1,28 Cdkal1                 | JUC1300005464.mm.1 | -2,33  | 0,032958 | 0,521223 |                          |
| TC1200002596.mm.1 | 1,34 Ighv6-6                | JUC1200010022.mm.1 | -2,33  | 0,020966 | 0,479982 |                          |
| TC1300000547.mm.1 | -1,16 G630093K05Rik         | JUC1300001729.mm.1 | -2,33  | 0,02792  | 0,505612 |                          |
| TC0100003026.mm.1 | -1,83 Mcm6                  | JUC0100013751.mm.1 | -2,33  | 0,036403 | 0,530878 |                          |
| TC1700001814.mm.1 | 1,11 Tmprss3                | JUC1700008972.mm.1 | -2,33  | 0,006663 | 0,393187 |                          |
| TC1500001661.mm.1 | 1,14 Zfat                   | JUC1500007065.mm.1 | -2,33  | 0,00142  | 0,327268 |                          |
| TC1500001202.mm.1 | -1,02 Brix1                 | JUC1500005474.mm.1 | -2,33  | 0,01304  | 0,439418 |                          |
| TC1600000448.mm.1 | 1,24 Tnk2                   | JUC1600002173.mm.1 | -2,33  | 0,044841 | 0,552566 |                          |
| TC0200000515.mm.1 | 1,41 Odf2                   | JUC0200001931.mm.1 | -2,33  | 0,0017   | 0,33549  |                          |
| TC0800000441.mm.1 | -1,12 D8Ert82e              | JUC0800001664.mm.1 | -2,33  | 0,041461 | 0,544702 |                          |
| TC0700000015.mm.1 | 1,17 Prpf31                 | JUC0700000076.mm.1 | -2,33  | 0,035757 | 0,529087 |                          |
| TC0500003376.mm.1 | 1,05 Lat2                   | JUC0500016566.mm.1 | -2,33  | 0,027402 | 0,503961 |                          |
| TC1000003209.mm.1 | -1,14 Vmn2r87               | JUC1000013199.mm.1 | -2,33  | 0,045804 | 0,554863 |                          |
| TC1100000726.mm.1 | -1,45 Nlrp3                 | JUC1100002980.mm.1 | -2,33  | 0,008244 | 0,405976 |                          |

|                   |                               |                    |        |          |          |                          |
|-------------------|-------------------------------|--------------------|--------|----------|----------|--------------------------|
| TC0400000529.mm.1 | -1,06 Nr4a3                   | JUC0400001938.mm.1 | -2,33  | 0,046145 | 0,555804 |                          |
| TC1000002437.mm.1 | -1,02 Trpm2; Gm22871; Gm223   | JUC1000009687.mm.1 | -2,33  | 0,016245 | 0,458312 |                          |
| TC1100002454.mm.1 | 1,01 Gm12106                  | JUC1100011889.mm.1 | -2,33  | 0,044257 | 0,551268 |                          |
| TC1100003563.mm.1 | -1,01 Spata20                 | JUC1100017044.mm.1 | -2,33  | 0,039722 | 0,540494 |                          |
| TC0X00003231.mm.1 | -1,34 Magea2                  | JUC0X00010191.mm.1 | -2,33  | 0,039882 | 0,54093  |                          |
| TC0100001313.mm.1 | 3,36 B3galt2                  | PSR0100010918.mm.1 | -2,34  | 0,022974 | 0,48884  |                          |
| TC0100001313.mm.1 | 3,36 B3galt2                  | PSR0100010910.mm.1 | -3,64  | 0,021714 | 0,484104 | Alternative 3' Acce 0,46 |
| TC0100001313.mm.1 | 3,36 B3galt2                  | PSR0100010908.mm.1 | -4,44  | 0,009557 | 0,416829 | Alternative 3' Acce 0,46 |
| TC0100001313.mm.1 | 3,36 B3galt2                  | PSR0100010909.mm.1 | -5,53  | 0,009461 | 0,416514 | Alternative 3' Acce 0,46 |
| TC0500000188.mm.1 | 3,74 Lhfpl3                   | PSR0500001365.mm.1 | -2,34  | 0,000761 | 0,308387 | Cassette Exon 0,26       |
| TC0500000188.mm.1 | 3,74 Lhfpl3                   | PSR0500001367.mm.1 | -2,71  | 0,01286  | 0,437783 | Cassette Exon 0,41       |
| TC0500000188.mm.1 | 3,74 Lhfpl3                   | JUC0500000785.mm.1 | -6,06  | 0,021763 | 0,484349 |                          |
| TC0500000188.mm.1 | 3,74 Lhfpl3                   | JUC0500000786.mm.1 | -6,07  | 0,008817 | 0,410077 |                          |
| TC0500000188.mm.1 | 3,74 Lhfpl3                   | JUC0500000783.mm.1 | -10,35 | 0,000839 | 0,311886 |                          |
| TC0900002757.mm.1 | 1,32 Phip                     | PSR0900022794.mm.1 | -2,34  | 0,036831 | 0,532211 | Intron Retention 0,34    |
| TC1600001919.mm.1 | 2,18 Samsn1                   | PSR1600014963.mm.1 | -2,34  | 0,006357 | 0,389469 | Cassette Exon 0,12       |
| TC1600001919.mm.1 | 2,18 Samsn1                   | PSR1600014962.mm.1 | -2,81  | 0,014257 | 0,447947 | Cassette Exon 0,24       |
| TC1600001919.mm.1 | 2,18 Samsn1                   | PSR1600014954.mm.1 | -3,03  | 0,017767 | 0,46545  | Alternative 3' Acce 0,31 |
| TC1600001919.mm.1 | 2,18 Samsn1                   | PSR1600014959.mm.1 | -3,15  | 0,044208 | 0,551188 | Alternative 5' Donc 0,34 |
| TC1600001919.mm.1 | 2,18 Samsn1                   | PSR1600014967.mm.1 | -3,92  | 0,000416 | 0,297771 | Cassette Exon 0,27       |
| TC1600001919.mm.1 | 2,18 Samsn1                   | JUC1600007722.mm.1 | -4,12  | 0,002394 | 0,348564 |                          |
| TC1600001919.mm.1 | 2,18 Samsn1                   | JUC1600007721.mm.1 | -5,66  | 0,000348 | 0,290082 |                          |
| TC1600001919.mm.1 | 2,18 Samsn1                   | JUC1600007723.mm.1 | -5,98  | 0,007268 | 0,398281 |                          |
| TC1600000564.mm.1 | 2,37 lgsf11                   | JUC1600002812.mm.1 | -2,34  | 0,04799  | 0,559574 |                          |
| TC1600000564.mm.1 | 2,37 lgsf11                   | PSR1600005347.mm.1 | -2,39  | 0,038737 | 0,537362 | Cassette Exon 0,1        |
| TC1600000564.mm.1 | 2,37 lgsf11                   | JUC1600002814.mm.1 | -3,04  | 0,024791 | 0,495094 |                          |
| TC1600000564.mm.1 | 2,37 lgsf11                   | PSR1600005346.mm.1 | -5,27  | 0,015163 | 0,452699 | Alternative 3' Acce 0,26 |
| TC1600000564.mm.1 | 2,37 lgsf11                   | JUC1600002816.mm.1 | -8,53  | 0,002328 | 0,346856 |                          |
| TC0400003234.mm.1 | 1,24 Scp2                     | JUC0400013412.mm.1 | -2,34  | 0,001216 | 0,322251 |                          |
| TC0400003234.mm.1 | 1,24 Scp2                     | PSR0400025754.mm.1 | -3,23  | 0,019227 | 0,472971 | Cassette Exon 0,24       |
| TC0100000523.mm.1 | -1,22 Zdbf2; Gm11607          | PSR0100004185.mm.1 | -2,34  | 0,000328 | 0,28927  | Alternative 3' Acce 0,21 |
| TC1600001151.mm.1 | 1,14 Glyr1                    | PSR1600009195.mm.1 | -2,34  | 0,034154 | 0,524919 | Alternative 3' Acce 0,2  |
| TC1200000069.mm.1 | 1,12 Sdc1                     | PSR1200000752.mm.1 | -2,34  | 0,001298 | 0,322929 | Alternative 5' Donc 0,18 |
| TC1000002374.mm.1 | 1,75 Gucd1                    | PSR1000016909.mm.1 | -2,34  | 0,018139 | 0,467372 | Cassette Exon 0,17       |
| TC1000002374.mm.1 | 1,75 Gucd1                    | JUC1000009232.mm.1 | -2,58  | 0,003164 | 0,353901 |                          |
| TC1000002374.mm.1 | 1,75 Gucd1                    | JUC1000009227.mm.1 | -3,13  | 0,001205 | 0,322249 |                          |
| TC0300002736.mm.1 | -1,58 Sypl2                   | PSR0300021481.mm.1 | -2,34  | 0,025962 | 0,499161 | Cassette Exon 0,16       |
| TC0X00002442.mm.1 | -1,13 Irak1; Mir718; Mir5132  | PSR0X00015367.mm.1 | -2,34  | 0,003686 | 0,357266 | Cassette Exon 0,12       |
| TC0400001582.mm.1 | 1,12 Snord99; Snhg12; Snora6  | PSR0400012426.mm.1 | -2,34  | 0,027846 | 0,505597 | Intron Retention 0,1     |
| TC1400000108.mm.1 | -1,09 Gm11100; LOC102633458   | JUC1400000527.mm.1 | -2,34  | 0,024317 | 0,49362  |                          |
| TC1200000775.mm.1 | 1,51 Rgs6                     | JUC1200003129.mm.1 | -2,34  | 0,009902 | 0,418332 |                          |
| TC1300001083.mm.1 | -1,02                         | JUC1300003598.mm.1 | -2,34  | 0,022255 | 0,485896 |                          |
| TC1700001813.mm.1 | -1,5 Tff1                     | JUC1700008966.mm.1 | -2,34  | 0,03202  | 0,518418 |                          |
| TC1900001272.mm.1 | 1,03                          | JUC1900006305.mm.1 | -2,34  | 0,029563 | 0,510436 |                          |
| TC0100000836.mm.1 | -1,46 Ugt1a2; Ugt1a6a; Ugt1a6 | JUC0100004068.mm.1 | -2,34  | 0,019016 | 0,471745 |                          |
| TC0100000048.mm.1 | 1,12 Csp1                     | JUC0100000228.mm.1 | -2,34  | 0,023641 | 0,491117 |                          |
| TC0100000048.mm.1 | 1,12 Csp1                     | JUC0100000218.mm.1 | -2,62  | 0,011569 | 0,429011 |                          |
| TC1800001628.mm.1 | 1,29 8030462N17Rik            | JUC1800006526.mm.1 | -2,34  | 0,02266  | 0,487609 |                          |

|                   |                              |                    |       |          |          |                     |      |
|-------------------|------------------------------|--------------------|-------|----------|----------|---------------------|------|
| TC1800001175.mm.1 | -1,24 Slc23a1                | JUC1800004825.mm.1 | -2,34 | 0,020909 | 0,479756 |                     |      |
| TC0100001383.mm.1 | 1,07                         | JUC0100006606.mm.1 | -2,34 | 0,049243 | 0,56256  |                     |      |
| TC1500000515.mm.1 | 1,13 Chrac1                  | JUC1500002114.mm.1 | -2,34 | 0,001279 | 0,322251 |                     |      |
| TC1700000305.mm.1 | -1,17 Vmn2r113               | JUC1700001194.mm.1 | -2,34 | 0,015253 | 0,452847 |                     |      |
| TC0800002244.mm.1 | 1,28 Cep44                   | JUC0800009300.mm.1 | -2,34 | 0,049487 | 0,563298 |                     |      |
| TC0500001779.mm.1 | 1,08 Cdk8                    | JUC0500008978.mm.1 | -2,34 | 0,008222 | 0,405976 |                     |      |
| TC0900000807.mm.1 | -1,01 1110036E04Rik          | JUC0900003229.mm.1 | -2,34 | 0,029784 | 0,511132 |                     |      |
| TC0500000371.mm.1 | -1,07                        | JUC0500001944.mm.1 | -2,34 | 0,003174 | 0,354243 |                     |      |
| TC0900001422.mm.1 | 1,52 Ip6k2                   | JUC0900006346.mm.1 | -2,34 | 0,026688 | 0,502057 |                     |      |
| TC0900001422.mm.1 | 1,52 Ip6k2                   | JUC0900006352.mm.1 | -3,31 | 0,024015 | 0,492783 |                     |      |
| TC0500003184.mm.1 | 1,03 Ptpn11                  | JUC0500015427.mm.1 | -2,34 | 0,014561 | 0,449719 |                     |      |
| TC0600000010.mm.1 | -1 Col1a2                    | JUC0600000095.mm.1 | -2,34 | 0,015446 | 0,454271 |                     |      |
| TC1000000605.mm.1 | -1,18 Ctnna3                 | JUC1000002297.mm.1 | -2,34 | 0,021828 | 0,484607 |                     |      |
| TC1000000605.mm.1 | -1,18 Ctnna3                 | JUC1000002301.mm.1 | -2,41 | 0,032565 | 0,520133 |                     |      |
| TC0400001515.mm.1 | 1,08 Yars                    | JUC0400006101.mm.1 | -2,34 | 0,032293 | 0,519116 |                     |      |
| TC0X00003427.mm.1 | -1,18 Xlr5a                  | JUC0X00007604.mm.1 | -2,34 | 0,014038 | 0,44654  |                     |      |
| TC0400003426.mm.1 | 3,26 Rimkla                  | PSR0400027846.mm.1 | -2,35 | 0,024187 | 0,493294 | Cassette Exon       | 0,22 |
| TC0400003426.mm.1 | 3,26 Rimkla                  | PSR0400027849.mm.1 | -2,78 | 0,000378 | 0,293011 | Cassette Exon       | 0,22 |
| TC0400003426.mm.1 | 3,26 Rimkla                  | JUC0400014517.mm.1 | -3,59 | 0,003295 | 0,354243 |                     |      |
| TC0400003426.mm.1 | 3,26 Rimkla                  | PSR0400027848.mm.1 | -3,92 | 0,000905 | 0,313363 | Cassette Exon       | 0,39 |
| TC0400003426.mm.1 | 3,26 Rimkla                  | PSR0400027852.mm.1 | -4,43 | 0,001272 | 0,322251 | Cassette Exon       | 0,22 |
| TC0400003426.mm.1 | 3,26 Rimkla                  | JUC0400014513.mm.1 | -7,68 | 0,001994 | 0,341091 |                     |      |
| TC0X00003023.mm.1 | 1,25 Bex1                    | PSR0X00018971.mm.1 | -2,35 | 0,010103 | 0,418998 | Intron Retention    | 0,32 |
| TC0700000647.mm.1 | 1,66 Pepd                    | PSR0700005447.mm.1 | -2,35 | 0,034641 | 0,526115 | Alternative 5' Donc | 0,21 |
| TC0900003044.mm.1 | 1,47 Rbm6                    | PSR0900025537.mm.1 | -2,35 | 0,002029 | 0,341377 | Alternative 3' Acce | 0,21 |
| TC1800000052.mm.1 | 1,1 Wac                      | PSR1800000354.mm.1 | -2,35 | 0,001454 | 0,328414 | Alternative 5' Donc | 0,21 |
| TC0200001922.mm.1 | 1,06 Acox1                   | PSR0200015100.mm.1 | -2,35 | 0,000165 | 0,272566 | Alternative 5' Donc | 0,18 |
| TC1100003090.mm.1 | -1,77 Alox12                 | PSR1100028518.mm.1 | -2,35 | 0,015068 | 0,45236  | Alternative 3' Acce | 0,18 |
| TC1100000002.mm.1 | 1,14 Gm11399                 | PSR1100000059.mm.1 | -2,35 | 0,018151 | 0,467399 | Cassette Exon       | 0,17 |
| TC1700000070.mm.1 | 1,9 Rps6ka2                  | JUC1700000306.mm.1 | -2,35 | 0,018428 | 0,468598 |                     |      |
| TC1700000070.mm.1 | 1,9 Rps6ka2                  | PSR1700000530.mm.1 | -2,65 | 0,028498 | 0,507345 | Cassette Exon       | 0,15 |
| TC1100002571.mm.1 | 1,41 Gm12149                 | PSR1100023766.mm.1 | -2,35 | 0,048491 | 0,560867 | Cassette Exon       | 0,14 |
| TC0400002634.mm.1 | 1,22 Acnat1                  | PSR0400021457.mm.1 | -2,35 | 0,000113 | 0,267977 | Cassette Exon       | 0,13 |
| TC0X00002234.mm.1 | 1,09 Mir322; Mir351; Mir503; | PSR0X00014158.mm.1 | -2,35 | 0,035705 | 0,529027 | Alternative 5' Donc | 0,11 |
| TC0X00002234.mm.1 | 1,09 Mir322; Mir351; Mir503; | PSR0X00014157.mm.1 | -2,54 | 0,014308 | 0,448073 | Alternative 5' Donc | 0,11 |
| TC0X00003396.mm.1 | 1,92 Nlgn3                   | PSR0X00006439.mm.1 | -2,35 | 0,019211 | 0,472971 | Alternative 5' Donc | 0,1  |
| TC0200004447.mm.1 | -1,24 Rpap1                  | JUC0200019035.mm.1 | -2,35 | 0,005867 | 0,383835 |                     |      |
| TC1900000908.mm.1 | 1,21 Rad9a                   | JUC1900004348.mm.1 | -2,35 | 0,02107  | 0,480303 |                     |      |
| TC1900000602.mm.1 | 1,47 Zdhhc16                 | JUC1900002881.mm.1 | -2,35 | 0,026509 | 0,501346 |                     |      |
| TC1900000602.mm.1 | 1,47 Zdhhc16                 | JUC1900002887.mm.1 | -2,45 | 0,021913 | 0,484832 |                     |      |
| TC0200002367.mm.1 | -1,05 Acss2                  | JUC0200009552.mm.1 | -2,35 | 0,029545 | 0,510307 |                     |      |
| TC1600001053.mm.1 | -1,43 Sim2                   | JUC1600004289.mm.1 | -2,35 | 0,039509 | 0,539762 |                     |      |
| TC0700000584.mm.1 | 1,03                         | JUC0700002611.mm.1 | -2,35 | 0,016114 | 0,457756 |                     |      |
| TC1100000894.mm.1 | 1,13 Tmem107                 | JUC1100003970.mm.1 | -2,35 | 0,014781 | 0,45081  |                     |      |
| TC0300001936.mm.1 | -1,35                        | JUC0300007779.mm.1 | -2,35 | 0,012954 | 0,438936 |                     |      |
| TC0X00000313.mm.1 | -1,44 Dock11                 | JUC0X00001055.mm.1 | -2,35 | 0,024098 | 0,49316  |                     |      |
| TC0400003522.mm.1 | 1,14 Zc3h12a                 | JUC0400014929.mm.1 | -2,35 | 0,003417 | 0,355257 |                     |      |
| TC0400003862.mm.1 | 1,29 Arhgef10l               | JUC0400016543.mm.1 | -2,35 | 0,038829 | 0,537696 |                     |      |

|                   |                                |                    |       |          |          |                          |
|-------------------|--------------------------------|--------------------|-------|----------|----------|--------------------------|
| TC0400003862.mm.1 | 1,29 Arhgef10l                 | JUC0400016529.mm.1 | -2,66 | 0,01526  | 0,452891 |                          |
| TC0400002471.mm.1 | 1,69 Fam219a                   | JUC0400010397.mm.1 | -2,35 | 0,001203 | 0,322097 |                          |
| TC0300002750.mm.1 | 1,93 Gpsm2                     | PSR0300021645.mm.1 | -2,36 | 0,011666 | 0,429939 | Alternative 5' Donc 0,19 |
| TC0300002750.mm.1 | 1,93 Gpsm2                     | PSR0300021646.mm.1 | -2,42 | 0,021331 | 0,481727 | Alternative 5' Donc 0,19 |
| TC0300002750.mm.1 | 1,93 Gpsm2                     | PSR0300021647.mm.1 | -2,57 | 0,018809 | 0,470836 | Cassette Exon 0,25       |
| TC0300002750.mm.1 | 1,93 Gpsm2                     | JUC0300011275.mm.1 | -3,39 | 0,009396 | 0,415633 |                          |
| TC0100001511.mm.1 | 1,11 Gm20743                   | PSR0100012460.mm.1 | -2,36 | 0,006756 | 0,393343 | Cassette Exon 0,13       |
| TC0100001511.mm.1 | 1,11 Gm20743                   | PSR0100012446.mm.1 | -2,76 | 0,04281  | 0,548097 | Cassette Exon 0,18       |
| TC0200003209.mm.1 | 1,27 Slc2a6                    | PSR0200027007.mm.1 | -2,36 | 0,005863 | 0,383815 | Intron Retention 0,18    |
| TC0300001559.mm.1 | 1,17 Lrriq3                    | PSR0300012597.mm.1 | -2,36 | 0,001528 | 0,330287 | Cassette Exon 0,17       |
| TC0200004383.mm.1 | 1,35 Meis2                     | PSR0200036647.mm.1 | -2,36 | 0,01469  | 0,450253 | Cassette Exon 0,14       |
| TC1200000737.mm.1 | 1,33 Exd2                      | PSR1200005176.mm.1 | -2,36 | 0,023527 | 0,490947 | Alternative 3' Acce 0,14 |
| TC0400004188.mm.1 | -1,18 Cyp4a32                  | PSR0400009004.mm.1 | -2,36 | 0,027051 | 0,502979 | Cassette Exon 0,13       |
| TC1100001264.mm.1 | -1,2 Wfdc17                    | PSR1100011838.mm.1 | -2,36 | 0,035872 | 0,529376 | Cassette Exon 0,12       |
| TC0700002257.mm.1 | -1,3 Vmn2r-ps45                | PSR0700020414.mm.1 | -2,36 | 0,042129 | 0,546571 | Cassette Exon 0,11       |
| TC0600003489.mm.1 | 2,36 Glcci1                    | JUC0600000282.mm.1 | -2,36 | 0,024604 | 0,494497 |                          |
| TC0600003489.mm.1 | 2,36 Glcci1                    | PSR0600000506.mm.1 | -2,39 | 0,003418 | 0,355257 | Cassette Exon 0,06       |
| TC0600003489.mm.1 | 2,36 Glcci1                    | JUC0600000284.mm.1 | -3,27 | 0,024715 | 0,494838 |                          |
| TC1400000120.mm.1 | -1,01 Nek10                    | JUC1400000633.mm.1 | -2,36 | 0,010776 | 0,423955 |                          |
| TC0200004508.mm.1 | -1 Shf                         | JUC0200019790.mm.1 | -2,36 | 0,006615 | 0,392269 |                          |
| TC1800000228.mm.1 | -1,18 4930474G06Rik            | JUC1800000929.mm.1 | -2,36 | 0,025587 | 0,497808 |                          |
| TC0100001543.mm.1 | 1,99                           | JUC0100007229.mm.1 | -2,36 | 0,016619 | 0,459964 |                          |
| TC0200001788.mm.1 | 1,25 Jmjd7; Pla2g4b; Jmjd7-pla | JUC0200006757.mm.1 | -2,36 | 0,000024 | 0,22008  |                          |
| TC0200001788.mm.1 | 1,25 Jmjd7; Pla2g4b; Jmjd7-pla | JUC0200006773.mm.1 | -2,51 | 0,040218 | 0,541714 |                          |
| TC1500000871.mm.1 | -1,08 Ncaph2                   | JUC1500003869.mm.1 | -2,36 | 0,011072 | 0,42589  |                          |
| TC0200002005.mm.1 | -1,04 Hspa12b                  | JUC0200007999.mm.1 | -2,36 | 0,006429 | 0,389972 |                          |
| TC1600000761.mm.1 | -1                             | JUC1600003516.mm.1 | -2,36 | 0,040013 | 0,541174 |                          |
| TC0900001543.mm.1 | -1,52                          | JUC0900007201.mm.1 | -2,36 | 0,043903 | 0,550652 |                          |
| TC0700004076.mm.1 | -1,22 St5                      | JUC0700017689.mm.1 | -2,36 | 0,006181 | 0,387873 |                          |
| TC1400002831.mm.1 | 1,9 Bcl2l2                     | PSR1400005893.mm.1 | -2,37 | 0,021545 | 0,483034 | Intron Retention 0,33    |
| TC1400002831.mm.1 | 1,9 Bcl2l2                     | PSR1400005890.mm.1 | -2,73 | 0,031572 | 0,51716  | Alternative 5' Donc 0,19 |
| TC1000000045.mm.1 | 3,97 Lrp11                     | PSR1000000334.mm.1 | -2,37 | 0,016945 | 0,461025 | Cassette Exon 0,23       |
| TC1000000045.mm.1 | 3,97 Lrp11                     | JUC1000000188.mm.1 | -2,54 | 0,018856 | 0,470956 |                          |
| TC1000000045.mm.1 | 3,97 Lrp11                     | PSR1000000325.mm.1 | -3,51 | 0,001411 | 0,326543 | Cassette Exon 0,25       |
| TC1000000045.mm.1 | 3,97 Lrp11                     | PSR1000000324.mm.1 | -3,59 | 0,019904 | 0,475879 | Cassette Exon 0,24       |
| TC1000002364.mm.1 | 1,17                           | PSR1000016853.mm.1 | -2,37 | 0,006995 | 0,395737 | Alternative 3' Acce 0,22 |
| TC0100003238.mm.1 | 1,89 2310030A07Rik             | PSR0100026187.mm.1 | -2,37 | 0,043732 | 0,550282 | Cassette Exon 0,2        |
| TC0100003238.mm.1 | 1,89 2310030A07Rik             | JUC0100014889.mm.1 | -2,73 | 0,015199 | 0,452738 |                          |
| TC1700002226.mm.1 | -1,33 Apobec2                  | PSR1700021051.mm.1 | -2,37 | 0,006418 | 0,389893 | Cassette Exon 0,19       |
| TC1700002226.mm.1 | -1,33 Apobec2                  | JUC1700011211.mm.1 | -2,43 | 0,029228 | 0,509609 |                          |
| TC0100002215.mm.1 | 1,29 Aff3                      | PSR0100017890.mm.1 | -2,37 | 0,002842 | 0,352207 | Alternative 3' Acce 0,18 |
| TC0800002059.mm.1 | 1,05                           | PSR0800015997.mm.1 | -2,37 | 0,048844 | 0,561693 | Cassette Exon 0,17       |
| TC1000001590.mm.1 | 1,32 GlS2                      | PSR1000011578.mm.1 | -2,37 | 0,01635  | 0,458679 | Alternative 5' Donc 0,16 |
| TC1000001590.mm.1 | 1,32 GlS2                      | JUC1000006208.mm.1 | -2,47 | 0,034482 | 0,525929 |                          |
| TC0300001712.mm.1 | 1,6 7530428D23Rik              | PSR0300013489.mm.1 | -2,37 | 0,023308 | 0,49004  | Cassette Exon 0,15       |
| TC0700002156.mm.1 | 1,35 Rdh13; Gm24605            | PSR0700019551.mm.1 | -2,37 | 0,023351 | 0,490143 | Cassette Exon 0,12       |
| TC0X00003265.mm.1 | -1,12 Gm15188                  | PSR0X00020435.mm.1 | -2,37 | 0,013674 | 0,444535 | Cassette Exon 0,11       |
| TC1300002606.mm.1 | 2,29 Rgs7bp                    | PSR1300017758.mm.1 | -2,37 | 0,037828 | 0,534803 | Cassette Exon 0,11       |

|                   |                             |                    |       |          |          |                     |      |
|-------------------|-----------------------------|--------------------|-------|----------|----------|---------------------|------|
| TC0200002667.mm.1 | 1,71 Cstf1                  | JUC0200011027.mm.1 | -2,37 | 0,018952 | 0,471398 |                     |      |
| TC0200005003.mm.1 | -1,13 Sla2                  | JUC0200022039.mm.1 | -2,37 | 0,039843 | 0,540922 |                     |      |
| TC1300000876.mm.1 | 1,13 Irx2                   | JUC1300002931.mm.1 | -2,37 | 0,02846  | 0,507299 |                     |      |
| TC1700000646.mm.1 | 1,01 Dxo; Dom3z             | JUC1700003540.mm.1 | -2,37 | 0,033752 | 0,523605 |                     |      |
| TC0800002779.mm.1 | -1,28                       | JUC0800011634.mm.1 | -2,37 | 0,034389 | 0,525677 |                     |      |
| TC0600001026.mm.1 | -1,2                        | JUC0600004087.mm.1 | -2,37 | 0,026913 | 0,502518 |                     |      |
| TC0700003731.mm.1 | 3,11                        | JUC0700016624.mm.1 | -2,37 | 0,000755 | 0,308387 |                     |      |
| TC1100001780.mm.1 | 1,14 Tcam1                  | JUC1100008754.mm.1 | -2,37 | 0,024303 | 0,49362  |                     |      |
| TC1100001780.mm.1 | 1,14 Tcam1                  | JUC1100008752.mm.1 | -2,71 | 0,023402 | 0,490259 |                     |      |
| TC0900003065.mm.1 | 1,65 P4htm                  | JUC0900014480.mm.1 | -2,37 | 0,004027 | 0,361636 |                     |      |
| TC1100003966.mm.1 | 3,46 Prkca                  | JUC1100019451.mm.1 | -2,38 | 0,000326 | 0,28927  |                     |      |
| TC1100003966.mm.1 | 3,46 Prkca                  | PSR1100037242.mm.1 | -2,52 | 0,017305 | 0,463271 | Cassette Exon       | 0,14 |
| TC1100003966.mm.1 | 3,46 Prkca                  | PSR1100037236.mm.1 | -2,63 | 0,007183 | 0,397855 | Alternative 3' Acce | 0,26 |
| TC1100003966.mm.1 | 3,46 Prkca                  | PSR1100037227.mm.1 | -2,77 | 0,010756 | 0,423859 | Cassette Exon       | 0,16 |
| TC1100003966.mm.1 | 3,46 Prkca                  | PSR1100037244.mm.1 | -2,99 | 0,020454 | 0,478018 | Cassette Exon       | 0,13 |
| TC1100003966.mm.1 | 3,46 Prkca                  | PSR1100037232.mm.1 | -3,58 | 0,009217 | 0,414099 | Alternative 5' Donc | 0,41 |
| TC0100003468.mm.1 | 1,36 Pogk                   | PSR0100028432.mm.1 | -2,38 | 0,010503 | 0,42211  | Alternative 5' Donc | 0,22 |
| TC1000000639.mm.1 | -1,06                       | PSR1000004368.mm.1 | -2,38 | 0,022612 | 0,487423 | Alternative 3' Acce | 0,22 |
| TC1200000038.mm.1 | 1,46 Atad2b                 | PSR1200000478.mm.1 | -2,38 | 0,015694 | 0,455416 | Alternative 5' Donc | 0,2  |
| TC1200000038.mm.1 | 1,46 Atad2b                 | JUC1200000283.mm.1 | -3,14 | 0,009269 | 0,414688 |                     |      |
| TC0300000244.mm.1 | 3,55 Sox2                   | PSR0300001584.mm.1 | -2,38 | 0,031508 | 0,516965 | Alternative 3' Acce | 0,16 |
| TC0300000244.mm.1 | 3,55 Sox2                   | JUC0300000793.mm.1 | -3,35 | 0,005256 | 0,377945 |                     |      |
| TC1000002229.mm.1 | 1,76 Chst3                  | PSR1000015583.mm.1 | -2,38 | 0,003965 | 0,359943 | Cassette Exon       | 0,15 |
| TC1200000232.mm.1 | -1,17                       | PSR1200001803.mm.1 | -2,38 | 0,004599 | 0,369794 | Cassette Exon       | 0,15 |
| TC0X00001978.mm.1 | -1,2 Gm5168                 | PSR0X00012552.mm.1 | -2,38 | 0,043032 | 0,54841  | Cassette Exon       | 0,13 |
| TC1500000914.mm.1 | 1,03                        | PSR1500007331.mm.1 | -2,38 | 0,043555 | 0,550033 | Cassette Exon       | 0,11 |
| TC1400000341.mm.1 | 1,23 Parg                   | JUC1400001788.mm.1 | -2,38 | 0,002626 | 0,349612 |                     |      |
| TC1400000341.mm.1 | 1,23 Parg                   | JUC1400001776.mm.1 | -2,64 | 0,016046 | 0,457283 |                     |      |
| TC0300000939.mm.1 | 1,26 Gm26689; 4930459I23Rik | JUC0300003869.mm.1 | -2,38 | 0,027741 | 0,505023 |                     |      |
| TC1300002496.mm.1 | -1,13                       | JUC1300008863.mm.1 | -2,38 | 0,037208 | 0,533262 |                     |      |
| TC1700002595.mm.1 | -1,03 Thumpd2               | JUC1700012802.mm.1 | -2,38 | 0,039326 | 0,539324 |                     |      |
| TC1700001067.mm.1 | -1,12 Dreh                  | JUC1700005450.mm.1 | -2,38 | 0,041629 | 0,545202 |                     |      |
| TC0700004489.mm.1 | 1,13 Tubgcp2                | JUC0700019878.mm.1 | -2,38 | 0,001846 | 0,337414 |                     |      |
| TC0700001626.mm.1 | 1,19 Swap70                 | JUC0700006924.mm.1 | -2,38 | 0,029812 | 0,511132 |                     |      |
| TC1100000547.mm.1 | -1,24 Adamts2               | JUC1100002227.mm.1 | -2,38 | 0,010102 | 0,418998 |                     |      |
| TC1100000547.mm.1 | -1,24 Adamts2               | JUC1100002215.mm.1 | -2,47 | 0,027793 | 0,505395 |                     |      |
| TC1100002697.mm.1 | -1,21 N4bp3                 | JUC1100012766.mm.1 | -2,38 | 0,008589 | 0,408223 |                     |      |
| TC0300002507.mm.1 | 1,26 Gm26553; 4930459I23Rik | JUC0300010169.mm.1 | -2,38 | 0,027741 | 0,505023 |                     |      |
| TC0400003253.mm.1 | 1,52 Zfyve9                 | JUC0400013470.mm.1 | -2,38 | 0,011549 | 0,428821 |                     |      |
| TC0400003896.mm.1 | 1,03 Fhad1                  | JUC0400016865.mm.1 | -2,38 | 0,012671 | 0,43631  |                     |      |
| TC0Y00000442.mm.1 | -1,04 Orly                  | JUC0Y00001767.mm.1 | -2,38 | 0,000692 | 0,305164 |                     |      |
| TC0400003369.mm.1 | 2,07 Rnf220                 | PSR0400027017.mm.1 | -2,39 | 0,009868 | 0,417961 | Alternative 3' Acce | 0,17 |
| TC0400003369.mm.1 | 2,07 Rnf220                 | PSR0400027031.mm.1 | -6,96 | 0,02226  | 0,485896 | Alternative 3' Acce | 0,44 |
| TC0800000036.mm.1 | 1,83 Cers4                  | PSR0800000445.mm.1 | -2,39 | 0,037991 | 0,535386 | Cassette Exon       | 0,24 |
| TC0800000036.mm.1 | 1,83 Cers4                  | PSR0800000447.mm.1 | -2,39 | 0,004725 | 0,370888 | Alternative 3' Acce | 0,17 |
| TC0800000036.mm.1 | 1,83 Cers4                  | JUC0800000247.mm.1 | -3,39 | 0,00048  | 0,298999 |                     |      |
| TC0600000765.mm.1 | 4,56 Ndnf                   | PSR0600005742.mm.1 | -2,39 | 0,008097 | 0,405071 | Alternative 5' Donc | 0,18 |
| TC0600000765.mm.1 | 4,56 Ndnf                   | PSR0600005732.mm.1 | -2,84 | 0,004652 | 0,370181 | Cassette Exon       | 0,21 |

|                   |                     |                    |       |          |          |                     |      |
|-------------------|---------------------|--------------------|-------|----------|----------|---------------------|------|
| TC0900002768.mm.1 | 1,27                | PSR0900022909.mm.1 | -2,39 | 0,000767 | 0,308403 | Cassette Exon       | 0,18 |
| TC0200004238.mm.1 | 1,33 D430041D05Rik  | PSR0200035657.mm.1 | -2,39 | 0,017815 | 0,465819 | Cassette Exon       | 0,13 |
| TC0200004238.mm.1 | 1,33 D430041D05Rik  | JUC0200018219.mm.1 | -2,68 | 0,00278  | 0,351017 |                     |      |
| TC0500000321.mm.1 | 1,5 Zfp512          | PSR0500002856.mm.1 | -2,39 | 0,012625 | 0,436032 | Cassette Exon       | 0,13 |
| TC1200000068.mm.1 | 1,31 Pum2           | PSR1200000693.mm.1 | -2,39 | 0,0267   | 0,502057 | Cassette Exon       | 0,11 |
| TC1800001045.mm.1 | -1,24 Dsc1          | PSR1800007728.mm.1 | -2,39 | 0,044635 | 0,552129 | Cassette Exon       | 0,1  |
| TC0200002700.mm.1 | 1,01 Gnas           | PSR0200022062.mm.1 | -2,39 | 0,006079 | 0,386691 | Cassette Exon       | 0,07 |
| TC0200003355.mm.1 | -1,27 Traf1         | PSR0200028800.mm.1 | -2,39 | 0,012705 | 0,436428 |                     |      |
| TC1800000835.mm.1 | 1,24 Epg5           | JUC1800003411.mm.1 | -2,39 | 0,036821 | 0,532174 |                     |      |
| TC1500002108.mm.1 | -1,01               | JUC1500009611.mm.1 | -2,39 | 0,030482 | 0,513325 |                     |      |
| TC0200002188.mm.1 | 1,33 A530006G24Rik  | JUC0200008739.mm.1 | -2,39 | 0,004561 | 0,369273 |                     |      |
| TC0200000577.mm.1 | 1,04 Ciz1           | JUC0200002670.mm.1 | -2,39 | 0,015407 | 0,453994 |                     |      |
| TC0600001966.mm.1 | -1,15 Gcc1          | JUC0600008054.mm.1 | -2,39 | 0,022594 | 0,487325 |                     |      |
| TC0X00001636.mm.1 | 7,91 Rs1            | JUC0X00005278.mm.1 | -2,4  | 0,023426 | 0,490372 |                     |      |
| TC0X00001636.mm.1 | 7,91 Rs1            | JUC0X00005281.mm.1 | -2,56 | 0,039095 | 0,538395 |                     |      |
| TC0X00001636.mm.1 | 7,91 Rs1            | PSR0X00010414.mm.1 | -8,17 | 0,011002 | 0,425491 | Alternative 3' Acce | 0,47 |
| TC0300002906.mm.1 | 1,15 Larp7          | PSR0300023018.mm.1 | -2,4  | 0,004818 | 0,371408 | Alternative 3' Acce | 0,22 |
| TC0900002220.mm.1 | 1,02 4931429L15Rik  | PSR0900018559.mm.1 | -2,4  | 0,003913 | 0,359698 | Alternative 3' Acce | 0,22 |
| TC1400002466.mm.1 | -1,34 Fam216b       | PSR1400018979.mm.1 | -2,4  | 0,038088 | 0,535633 | Alternative 3' Acce | 0,22 |
| TC0900000711.mm.1 | 1,22 Ulk3           | PSR0900005229.mm.1 | -2,4  | 0,011721 | 0,429969 | Alternative 5' Donc | 0,21 |
| TC0900001665.mm.1 | 1,7 Limd1           | PSR0900014002.mm.1 | -2,4  | 0,029221 | 0,509537 | Alternative 5' Donc | 0,2  |
| TC0700000223.mm.1 | 1,26 Meis3          | JUC0700000793.mm.1 | -2,4  | 0,019187 | 0,472828 |                     |      |
| TC0700000223.mm.1 | 1,26 Meis3          | PSR0700001608.mm.1 | -3,01 | 0,016206 | 0,458282 | Cassette Exon       | 0,19 |
| TC1300002322.mm.1 | 1,24                | PSR1300015287.mm.1 | -2,4  | 0,04468  | 0,55216  | Alternative 5' Donc | 0,18 |
| TC0600001632.mm.1 | 1,74 Pde6h          | PSR0600012973.mm.1 | -2,4  | 0,022344 | 0,486348 | Cassette Exon       | 0,17 |
| TC1300000147.mm.1 | -2,1 Sfrp4          | PSR1300000999.mm.1 | -2,4  | 0,005689 | 0,382387 | Cassette Exon       | 0,16 |
| TC0200001523.mm.1 | -1,02 Pamr1         | PSR0200011427.mm.1 | -2,4  | 0,001096 | 0,317328 | Cassette Exon       | 0,14 |
| TC0400001465.mm.1 | -1,16 Clspn         | PSR0400011178.mm.1 | -2,4  | 0,011329 | 0,427211 | Cassette Exon       | 0,13 |
| TC0600001742.mm.1 | 1,48 Mrps35         | PSR0600013897.mm.1 | -2,4  | 0,029805 | 0,511132 | Cassette Exon       | 0,13 |
| TC1200002194.mm.1 | 1,2 Ptpn21          | PSR1200015158.mm.1 | -2,4  | 0,006934 | 0,395269 | Cassette Exon       | 0,13 |
| TC1800000953.mm.1 | -1,1 Mkk            | PSR1800007019.mm.1 | -2,4  | 0,013051 | 0,439551 | Cassette Exon       | 0,13 |
| TC1400002260.mm.1 | -1,13 Esco2         | JUC1400009531.mm.1 | -2,4  | 0,007749 | 0,402774 |                     |      |
| TC0300000308.mm.1 | -1,34 Plk4          | JUC0300001163.mm.1 | -2,4  | 0,015369 | 0,453849 |                     |      |
| TC1200002077.mm.1 | 1,23 Entpd5         | JUC1200007824.mm.1 | -2,4  | 0,034627 | 0,526041 |                     |      |
| TC1300001130.mm.1 | -1,44               | JUC1300003735.mm.1 | -2,4  | 0,034204 | 0,525106 |                     |      |
| TC1700001767.mm.1 | -1,03 Slc26a8       | JUC1700008785.mm.1 | -2,4  | 0,028783 | 0,508148 |                     |      |
| TC1500000214.mm.1 | -1,38               | JUC1500000929.mm.1 | -2,4  | 0,002478 | 0,349135 |                     |      |
| TC0800001915.mm.1 | 1,48 Letm2          | PSR0800015279.mm.1 | -2,4  | 0,032234 | 0,51899  |                     |      |
| TC0800002722.mm.1 | 1,2 Amfr            | JUC0800011351.mm.1 | -2,4  | 0,038081 | 0,535633 |                     |      |
| TC0700001915.mm.1 | -1,13 1700029B22Rik | JUC0700008894.mm.1 | -2,4  | 0,007538 | 0,401261 |                     |      |
| TC1100000276.mm.1 | 1,27 Gm12081        | JUC1100001218.mm.1 | -2,4  | 0,002934 | 0,352289 |                     |      |
| TC1100003487.mm.1 | -1,2 Lpo            | JUC1100016706.mm.1 | -2,4  | 0,015612 | 0,455082 |                     |      |
| TC1100003296.mm.1 | -1,28 Slc13a2       | JUC1100015893.mm.1 | -2,4  | 0,025031 | 0,496091 |                     |      |
| TC0400002822.mm.1 | -1,05 Astd2         | JUC0400012082.mm.1 | -2,4  | 0,004806 | 0,371408 |                     |      |
| TC0X00003425.mm.1 | -1,29 Cul4b         | JUC0X00006781.mm.1 | -2,4  | 0,047287 | 0,558242 |                     |      |
| TC1700001860.mm.1 | 2,24 Zfp763         | PSR1700017232.mm.1 | -2,41 | 0,047877 | 0,559408 | Cassette Exon       | 0,1  |
| TC1700001860.mm.1 | 2,24 Zfp763         | PSR1700017234.mm.1 | -2,92 | 0,048534 | 0,560994 | Alternative 5' Donc | 0,31 |
| TC0500000172.mm.1 | 1,21 Fam185a        | PSR0500001223.mm.1 | -2,41 | 0,003678 | 0,357266 | Alternative 5' Donc | 0,22 |



|                   |                     |                    |        |          |                              |      |
|-------------------|---------------------|--------------------|--------|----------|------------------------------|------|
| TC0500000172.mm.1 | 1,21 Fam185a        | PSR0500001217.mm.1 | -2,74  | 0,013358 | 0,442089 Alternative 3' Acce | 0,27 |
| TC1800000901.mm.1 | 2,78 Cbln2          | PSR1800006508.mm.1 | -2,41  | 0,029734 | 0,511096 Cassette Exon       | 0,08 |
| TC1800000901.mm.1 | 2,78 Cbln2          | PSR1800006511.mm.1 | -3,31  | 0,015446 | 0,454271 Cassette Exon       | 0,24 |
| TC1800000901.mm.1 | 2,78 Cbln2          | PSR1800006510.mm.1 | -3,65  | 0,002422 | 0,34896 Cassette Exon        | 0,24 |
| TC0600002314.mm.1 | 2,05 Scrn1          | PSR0600018090.mm.1 | -2,41  | 0,034997 | 0,527405 Cassette Exon       | 0,1  |
| TC0600002314.mm.1 | 2,05 Scrn1          | PSR0600018085.mm.1 | -3,34  | 0,005752 | 0,383101 Cassette Exon       | 0,22 |
| TC0400001006.mm.1 | 1,14 Alg6           | PSR0400006771.mm.1 | -2,41  | 0,001252 | 0,322251 Alternative 3' Acce | 0,21 |
| TC0400001006.mm.1 | 1,14 Alg6           | JUC0400003454.mm.1 | -5,99  | 0,04289  | 0,548183                     |      |
| TC0200003146.mm.1 | 1,7 Dpp7            | JUC0200013124.mm.1 | -2,41  | 0,034964 | 0,52724                      |      |
| TC0200003146.mm.1 | 1,7 Dpp7            | PSR0200025935.mm.1 | -2,49  | 0,035222 | 0,528366 Cassette Exon       | 0,16 |
| TC1000001209.mm.1 | -1,14 B530045E10Rik | PSR1000009086.mm.1 | -2,41  | 0,003325 | 0,354243 Cassette Exon       | 0,14 |
| TC0X00003351.mm.1 | -1,5 Gm15230        | PSR0X00020900.mm.1 | -2,41  | 0,002739 | 0,349612 Cassette Exon       | 0,13 |
| TC0900000540.mm.1 | 1,1 Fxyd6           | PSR0900003741.mm.1 | -2,41  | 0,006546 | 0,392081 Cassette Exon       | 0,12 |
| TC1200000239.mm.1 | 1,01 Tssc1          | JUC1200001051.mm.1 | -2,41  | 0,044235 | 0,55119                      |      |
| TC1700001100.mm.1 | 1,03 L3mbtl4        | JUC1700005636.mm.1 | -2,41  | 0,032006 | 0,518367                     |      |
| TC1900000866.mm.1 | 1,46 Grk5           | JUC1900004106.mm.1 | -2,41  | 0,031326 | 0,516208                     |      |
| TC1900000866.mm.1 | 1,46 Grk5           | JUC1900004103.mm.1 | -2,43  | 0,042826 | 0,548097                     |      |
| TC0100003304.mm.1 | 1,1 Xpr1            | JUC0100015377.mm.1 | -2,41  | 0,047932 | 0,559506                     |      |
| TC1400002515.mm.1 | 1,35 Diap3          | JUC1400010660.mm.1 | -2,41  | 0,031245 | 0,516001                     |      |
| TC0800001247.mm.1 | 1,06 Prmt7          | JUC0800005428.mm.1 | -2,41  | 0,01139  | 0,427549                     |      |
| TC0800000632.mm.1 | 1,46 AW046200       | JUC0800002264.mm.1 | -2,41  | 0,002407 | 0,348653                     |      |
| TC0800000589.mm.1 | 1,16                | JUC0800002200.mm.1 | -2,41  | 0,042677 | 0,548097                     |      |
| TC0800002818.mm.1 | 1,02 Lrrc29         | JUC0800011818.mm.1 | -2,41  | 0,008512 | 0,407441                     |      |
| TC0300002095.mm.1 | -1,11               | JUC0300008303.mm.1 | -2,41  | 0,000535 | 0,304044                     |      |
| TC1100001163.mm.1 | 2,19 Sebox          | JUC1100005684.mm.1 | -2,41  | 0,011947 | 0,431753                     |      |
| TC0400004147.mm.1 | 1,43 Mib2           | JUC0400018117.mm.1 | -2,41  | 0,000358 | 0,290838                     |      |
| TC1700001756.mm.1 | 9,75 Tulp1          | PSR1700016187.mm.1 | -2,42  | 0,018039 | 0,467148 Alternative 5' Donc | 0,51 |
| TC1700001756.mm.1 | 9,75 Tulp1          | PSR1700016190.mm.1 | -2,79  | 0,016794 | 0,460623 Cassette Exon       | 0,42 |
| TC1700001756.mm.1 | 9,75 Tulp1          | JUC1700008718.mm.1 | -3,59  | 0,039623 | 0,540083                     |      |
| TC1700001756.mm.1 | 9,75 Tulp1          | PSR1700016191.mm.1 | -3,61  | 0,003388 | 0,3547 Cassette Exon         | 0,37 |
| TC1700001756.mm.1 | 9,75 Tulp1          | PSR1700016173.mm.1 | -4,25  | 0,005173 | 0,376797 Intron Retention    | 0,38 |
| TC1700001756.mm.1 | 9,75 Tulp1          | PSR1700016167.mm.1 | -4,79  | 0,009508 | 0,416602 Alternative 3' Acce | 0,48 |
| TC1700001756.mm.1 | 9,75 Tulp1          | PSR1700016192.mm.1 | -4,83  | 0,002983 | 0,352501 Cassette Exon       | 0,5  |
| TC1700001756.mm.1 | 9,75 Tulp1          | PSR1700016168.mm.1 | -5,46  | 0,004599 | 0,369794 Alternative 3' Acce | 0,48 |
| TC1700001756.mm.1 | 9,75 Tulp1          | PSR1700016188.mm.1 | -5,62  | 0,011069 | 0,425887 Cassette Exon       | 0,42 |
| TC1700001756.mm.1 | 9,75 Tulp1          | PSR1700016181.mm.1 | -5,78  | 0,010652 | 0,422928 Alternative 5' Donc | 0,47 |
| TC1700001756.mm.1 | 9,75 Tulp1          | PSR1700016186.mm.1 | -5,94  | 0,003027 | 0,353502 Alternative 5' Donc | 0,51 |
| TC1700001756.mm.1 | 9,75 Tulp1          | PSR1700016163.mm.1 | -5,94  | 0,001978 | 0,340886 Alternative 3' Acce | 0,4  |
| TC1700001756.mm.1 | 9,75 Tulp1          | PSR1700016174.mm.1 | -5,95  | 0,019387 | 0,473657                     |      |
| TC1700001756.mm.1 | 9,75 Tulp1          | PSR1700016194.mm.1 | -6,27  | 0,001967 | 0,340561 Cassette Exon       | 0,41 |
| TC1700001756.mm.1 | 9,75 Tulp1          | PSR1700016193.mm.1 | -6,63  | 0,006845 | 0,393893 Cassette Exon       | 0,37 |
| TC1700001756.mm.1 | 9,75 Tulp1          | PSR1700016185.mm.1 | -7,27  | 0,035651 | 0,528956 Alternative 5' Donc | 0,51 |
| TC1700001756.mm.1 | 9,75 Tulp1          | PSR1700016201.mm.1 | -8,41  | 0,020916 | 0,479793 Alternative 5' Donc | 0,33 |
| TC1700001756.mm.1 | 9,75 Tulp1          | JUC1700008729.mm.1 | -9,7   | 0,00668  | 0,393187                     |      |
| TC1700001756.mm.1 | 9,75 Tulp1          | PSR1700016166.mm.1 | -9,73  | 0,003417 | 0,355257 Alternative 3' Acce | 0,48 |
| TC1700001756.mm.1 | 9,75 Tulp1          | JUC1700008719.mm.1 | -11,72 | 0,004912 | 0,372662                     |      |
| TC1700001756.mm.1 | 9,75 Tulp1          | PSR1700016176.mm.1 | -12,01 | 0,003027 | 0,353502 Alternative 3' Acce | 0,51 |
| TC1700001756.mm.1 | 9,75 Tulp1          | JUC1700008725.mm.1 | -12,12 | 0,018143 | 0,467399                     |      |

|                   |                            |                    |        |          |                              |      |
|-------------------|----------------------------|--------------------|--------|----------|------------------------------|------|
| TC1700001756.mm.1 | 9,75 Tulp1                 | PSR1700016189.mm.1 | -13,1  | 0,032308 | 0,519155 Cassette Exon       | 0,42 |
| TC1700001756.mm.1 | 9,75 Tulp1                 | JUC1700008722.mm.1 | -13,5  | 0,022707 | 0,487767                     |      |
| TC1700001756.mm.1 | 9,75 Tulp1                 | JUC1700008728.mm.1 | -13,51 | 0,00172  | 0,335996                     |      |
| TC1700001756.mm.1 | 9,75 Tulp1                 | JUC1700008720.mm.1 | -14,24 | 0,002066 | 0,341993                     |      |
| TC1700001756.mm.1 | 9,75 Tulp1                 | PSR1700016196.mm.1 | -15,94 | 0,004685 | 0,370338 Intron Retention    | 0,38 |
| TC1700001756.mm.1 | 9,75 Tulp1                 | PSR1700016178.mm.1 | -17,2  | 0,002303 | 0,346364 Alternative 5' Donc | 0,36 |
| TC1200002410.mm.1 | 1,6 2810029C07Rik          | PSR1200016721.mm.1 | -2,42  | 0,048226 | 0,56024 Intron Retention     | 0,35 |
| TC1200002410.mm.1 | 1,6 2810029C07Rik          | PSR1200016724.mm.1 | -2,45  | 0,003772 | 0,357586 Alternative 5' Donc | 0,23 |
| TC1200002410.mm.1 | 1,6 2810029C07Rik          | JUC1200009219.mm.1 | -4,21  | 0,013285 | 0,441719                     |      |
| TC1600001092.mm.1 | -1,13 Mx2                  | JUC1600004502.mm.1 | -2,42  | 0,036464 | 0,531117                     |      |
| TC1600001092.mm.1 | -1,13 Mx2                  | PSR1600008644.mm.1 | -3,12  | 0,000099 | 0,262646 Cassette Exon       | 0,26 |
| TC0400002389.mm.1 | 1,35 1700003M02Rik         | PSR0400019382.mm.1 | -2,42  | 0,011449 | 0,427811 Cassette Exon       | 0,13 |
| TC0400002389.mm.1 | 1,35 1700003M02Rik         | JUC0400010105.mm.1 | -2,99  | 0,022706 | 0,487767                     |      |
| TC0400002389.mm.1 | 1,35 1700003M02Rik         | PSR0400019383.mm.1 | -3,54  | 0,034088 | 0,524719 Cassette Exon       | 0,23 |
| TC0600001750.mm.1 | 1,22 1700049E15Rik         | PSR0600013959.mm.1 | -2,42  | 0,019231 | 0,472971 Cassette Exon       | 0,16 |
| TC0Y00000001.mm.1 | 1,47                       | PSR0Y00000003.mm.1 | -2,42  | 0,001414 | 0,32678 Cassette Exon        | 0,14 |
| TC0500000291.mm.1 | -1,1 Drc1                  | PSR0500002281.mm.1 | -2,42  | 0,00274  | 0,349612 Cassette Exon       | 0,13 |
| TC0500001131.mm.1 | 1,81 Zfp605                | PSR0500009627.mm.1 | -2,42  | 0,02005  | 0,476473 Cassette Exon       | 0,13 |
| TC1200002295.mm.1 | 1,61 Dicer1                | JUC1200008816.mm.1 | -2,42  | 0,03306  | 0,521637                     |      |
| TC0100001195.mm.1 | 1,5 Rbbp5                  | JUC0100005616.mm.1 | -2,42  | 0,02413  | 0,493245                     |      |
| TC0500001692.mm.1 | -1,12 Eif3b                | JUC0500008440.mm.1 | -2,42  | 0,036341 | 0,530559                     |      |
| TC0500000176.mm.1 | 1,07 Pmpcb                 | JUC0500000743.mm.1 | -2,42  | 0,025013 | 0,496061                     |      |
| TC0800003047.mm.1 | 1,01 Mthfsd                | JUC0800012859.mm.1 | -2,42  | 0,011668 | 0,429939                     |      |
| TC0800003047.mm.1 | 1,01 Mthfsd                | JUC0800012864.mm.1 | -4,99  | 0,004395 | 0,366181                     |      |
| TC0900000182.mm.1 | 1,06 Ppan; Gm24067; Gm2300 | JUC0900000569.mm.1 | -2,42  | 0,042819 | 0,548097                     |      |
| TC0700003850.mm.1 | 1,1 Il18bp                 | JUC0700017198.mm.1 | -2,42  | 0,031645 | 0,517405                     |      |
| TC0700001997.mm.1 | -1,36 Kndc1                | JUC0700009307.mm.1 | -2,42  | 0,025851 | 0,498657                     |      |
| TC0900001970.mm.1 | 1,35                       | JUC0900009304.mm.1 | -2,42  | 0,041592 | 0,544987                     |      |
| TC0900002152.mm.1 | -1,09 Nlrx1                | JUC0900010047.mm.1 | -2,42  | 0,031241 | 0,515984                     |      |
| TC0900002472.mm.1 | 1,27 Map2k5                | JUC0900011660.mm.1 | -2,42  | 0,000949 | 0,313363                     |      |
| TC0200005477.mm.1 | 5,21 A530058N18Rik         | PSR0200012552.mm.1 | -2,43  | 0,003152 | 0,353892 Intron Retention    | 0,46 |
| TC0200005477.mm.1 | 5,21 A530058N18Rik         | PSR0200012547.mm.1 | -3,08  | 0,007995 | 0,403853 Cassette Exon       | 0,21 |
| TC0200005477.mm.1 | 5,21 A530058N18Rik         | PSR0200012550.mm.1 | -3,12  | 0,003228 | 0,354243 Intron Retention    | 0,46 |
| TC0200005477.mm.1 | 5,21 A530058N18Rik         | PSR0200012551.mm.1 | -3,47  | 0,028956 | 0,508766 Intron Retention    | 0,46 |
| TC0200005477.mm.1 | 5,21 A530058N18Rik         | PSR0200012563.mm.1 | -3,97  | 0,002318 | 0,346481 Alternative 5' Donc | 0,46 |
| TC0200005477.mm.1 | 5,21 A530058N18Rik         | PSR0200046663.mm.1 | -5,37  | 0,005378 | 0,378749 Cassette Exon       | 0,21 |
| TC0200005477.mm.1 | 5,21 A530058N18Rik         | PSR0200012541.mm.1 | -6,21  | 0,002874 | 0,352207 Cassette Exon       | 0,21 |
| TC0200005477.mm.1 | 5,21 A530058N18Rik         | JUC0200006243.mm.1 | -6,61  | 0,000518 | 0,303623                     |      |
| TC0200005477.mm.1 | 5,21 A530058N18Rik         | JUC0200006250.mm.1 | -9,95  | 0,00699  | 0,395722                     |      |
| TC0200005477.mm.1 | 5,21 A530058N18Rik         | JUC0200006249.mm.1 | -10,51 | 0,0012   | 0,321581                     |      |
| TC1000001025.mm.1 | 2,9 Ric8b                  | JUC1000004158.mm.1 | -2,43  | 0,015232 | 0,452839                     |      |
| TC1000001025.mm.1 | 2,9 Ric8b                  | PSR1000007746.mm.1 | -2,63  | 0,019566 | 0,474636 Alternative 3' Acce | 0,23 |
| TC1000001025.mm.1 | 2,9 Ric8b                  | PSR1000007758.mm.1 | -3,85  | 0,005537 | 0,380557 Alternative 3' Acce | 0,39 |
| TC0100003627.mm.1 | 2,77 Akt3                  | PSR0100029768.mm.1 | -2,43  | 0,012661 | 0,43631 Cassette Exon        | 0,13 |
| TC0100003627.mm.1 | 2,77 Akt3                  | JUC0100016931.mm.1 | -2,44  | 0,014772 | 0,450801                     |      |
| TC0100003627.mm.1 | 2,77 Akt3                  | PSR0100029784.mm.1 | -2,61  | 0,006716 | 0,393343 Alternative 5' Donc | 0,26 |
| TC0100003627.mm.1 | 2,77 Akt3                  | PSR0100029785.mm.1 | -3,29  | 0,00389  | 0,359225 Cassette Exon       | 0,21 |
| TC0800001085.mm.1 | 1,83 Gnao1                 | JUC0800004459.mm.1 | -2,43  | 0,043751 | 0,550368                     |      |

|                   |                             |                    |       |          |                              |      |
|-------------------|-----------------------------|--------------------|-------|----------|------------------------------|------|
| TC0800001085.mm.1 | 1,83 Gnao1                  | PSR0800008343.mm.1 | -2,58 | 0,001472 | 0,329052 Alternative 5' Donc | 0,26 |
| TC0800001085.mm.1 | 1,83 Gnao1                  | JUC0800004452.mm.1 | -3,44 | 0,012444 | 0,43528                      |      |
| TC1200002345.mm.1 | 1,13 Setd3                  | PSR1200016309.mm.1 | -2,43 | 0,004734 | 0,370888 Alternative 5' Donc | 0,2  |
| TC0200000879.mm.1 | 1,44 Upp2; Gm13558          | PSR0200007081.mm.1 | -2,43 | 0,013802 | 0,445012 Cassette Exon       | 0,14 |
| TC0200004843.mm.1 | -1,04 Acss1                 | PSR0200041229.mm.1 | -2,43 | 0,007591 | 0,401712 Cassette Exon       | 0,14 |
| TC0300001950.mm.1 | 1,24                        | PSR0300014864.mm.1 | -2,43 | 0,018648 | 0,470078 Cassette Exon       | 0,14 |
| TC0300001281.mm.1 | 1,11                        | PSR0300010438.mm.1 | -2,43 | 0,002151 | 0,343679 Cassette Exon       | 0,13 |
| TC0900001243.mm.1 | 2,33 Faim                   | PSR0900009708.mm.1 | -2,43 | 0,013372 | 0,442269 Cassette Exon       | 0,13 |
| TC1400001915.mm.1 | 1,13 Rubie; Gm15219         | JUC1400007941.mm.1 | -2,43 | 0,034048 | 0,524583                     |      |
| TC0100001089.mm.1 | -1,22                       | JUC0100005155.mm.1 | -2,43 | 0,034647 | 0,526139                     |      |
| TC0100000601.mm.1 | 1,86 Tmem169                | JUC0100002831.mm.1 | -2,43 | 0,018285 | 0,468049                     |      |
| TC0800001635.mm.1 | 1,27 Elav1                  | JUC0800007350.mm.1 | -2,43 | 0,017102 | 0,46232                      |      |
| TC0500002650.mm.1 | 1,05 Noa1                   | JUC0500012748.mm.1 | -2,43 | 0,028513 | 0,507402                     |      |
| TC0700000413.mm.1 | 1,07 Megf8                  | JUC0700001600.mm.1 | -2,43 | 0,018072 | 0,46716                      |      |
| TC0700002153.mm.1 | -1,32 Gp6                   | JUC0700010381.mm.1 | -2,43 | 0,009812 | 0,417839                     |      |
| TC1100002874.mm.1 | 1,35 Atpaf2                 | JUC1100013621.mm.1 | -2,43 | 0,020394 | 0,47784                      |      |
| TC1100001538.mm.1 | -1,19 Arhgap23              | JUC1100007369.mm.1 | -2,43 | 0,002785 | 0,35133                      |      |
| TC0X00003164.mm.1 | 1,11 Apex2                  | JUC0X00010026.mm.1 | -2,43 | 0,016003 | 0,457051                     |      |
| TC0X00003164.mm.1 | 1,11 Apex2                  | JUC0X00010024.mm.1 | -2,62 | 0,045072 | 0,553115                     |      |
| TC1700002660.mm.1 | 2,7 Prepl                   | PSR1700024174.mm.1 | -2,44 | 0,031784 | 0,517596 Alternative 5' Donc | 0,11 |
| TC1700002660.mm.1 | 2,7 Prepl                   | PSR1700024168.mm.1 | -3,18 | 0,028024 | 0,505851 Alternative 5' Donc | 0,35 |
| TC1700002660.mm.1 | 2,7 Prepl                   | JUC1700013042.mm.1 | -3,58 | 0,011236 | 0,426718                     |      |
| TC0200004281.mm.1 | 1,29 BB218582; LOC102640562 | JUC0200018373.mm.1 | -2,44 | 0,030818 | 0,514173                     |      |
| TC0200004281.mm.1 | 1,29 BB218582; LOC102640562 | PSR0200035971.mm.1 | -2,94 | 0,0089   | 0,410728 Alternative 3' Acce | 0,3  |
| TC0900000509.mm.1 | 1,76 Slc37a4                | PSR0900003470.mm.1 | -2,44 | 0,018103 | 0,467161 Alternative 3' Acce | 0,23 |
| TC0200002876.mm.1 | 2,01 Camk1d                 | PSR0200023855.mm.1 | -2,44 | 0,005717 | 0,382767 Alternative 3' Acce | 0,17 |
| TC1500001778.mm.1 | 2,13 Scrt1                  | PSR1500013684.mm.1 | -2,44 | 0,005646 | 0,381706 Cassette Exon       | 0,15 |
| TC1500001778.mm.1 | 2,13 Scrt1                  | PSR1500013685.mm.1 | -2,85 | 0,002627 | 0,349612 Cassette Exon       | 0,15 |
| TC1500001778.mm.1 | 2,13 Scrt1                  | JUC1500007797.mm.1 | -2,89 | 0,018114 | 0,467161                     |      |
| TC1400002281.mm.1 | 1,26 Bnip3l; Gm10480        | JUC1400009647.mm.1 | -2,44 | 0,035522 | 0,528764                     |      |
| TC0300001124.mm.1 | -1,05 Gstm5                 | JUC0300004733.mm.1 | -2,44 | 0,000242 | 0,28803                      |      |
| TC0100003882.mm.1 | 1,36 Chpf                   | JUC0100012067.mm.1 | -2,44 | 0,007741 | 0,402774                     |      |
| TC1700001822.mm.1 | 1,09 Cbs                    | JUC1700009012.mm.1 | -2,44 | 0,006912 | 0,394898                     |      |
| TC0800001733.mm.1 | 1,41 Dcun1d2                | JUC0800007645.mm.1 | -2,44 | 0,010875 | 0,424174                     |      |
| TC0500003592.mm.1 | 1,05 Zkscan14               | JUC0500017925.mm.1 | -2,44 | 0,010022 | 0,418657                     |      |
| TC0700002028.mm.1 | -1,11 Psm13                 | JUC0700009447.mm.1 | -2,44 | 0,017478 | 0,463933                     |      |
| TC0500002770.mm.1 | 2,33 Ccni                   | PSR0500024436.mm.1 | -2,45 | 0,035261 | 0,52837 Cassette Exon        | 0,17 |
| TC1300000157.mm.1 | 1,06 Aoah                   | PSR1300001068.mm.1 | -2,45 | 0,012952 | 0,438927 Cassette Exon       | 0,17 |
| TC0500001123.mm.1 | 1,37 Gm26779                | PSR0500009558.mm.1 | -2,45 | 0,009742 | 0,417839 Cassette Exon       | 0,16 |
| TC0400001207.mm.1 | -1,18 Skint11               | PSR0400008775.mm.1 | -2,45 | 0,021953 | 0,485095 Cassette Exon       | 0,13 |
| TC0700004312.mm.1 | 1,51 Qprt                   | PSR0700036188.mm.1 | -2,45 | 0,049446 | 0,563154 Cassette Exon       | 0,12 |
| TC0200005181.mm.1 | -1,11 Znf1                  | JUC0200022885.mm.1 | -2,45 | 0,01888  | 0,471134                     |      |
| TC1500002349.mm.1 | 1,02 Tonsl                  | JUC1500007891.mm.1 | -2,45 | 0,028883 | 0,50858                      |      |
| TC0100003799.mm.1 | 1,23 Tatdn3                 | JUC0100017642.mm.1 | -2,45 | 0,00263  | 0,349612                     |      |
| TC1600001117.mm.1 | -1,09 Crebbp                | JUC1600004621.mm.1 | -2,45 | 0,010579 | 0,422482                     |      |
| TC0800000787.mm.1 | 1,19 Ankle1                 | JUC0800003013.mm.1 | -2,45 | 0,024083 | 0,493056                     |      |
| TC0800002861.mm.1 | 1,43 Chtf8                  | JUC0800012073.mm.1 | -2,45 | 0,047061 | 0,557783                     |      |
| TC0700001870.mm.1 | 1,5 Kat8                    | JUC0700008468.mm.1 | -2,45 | 0,027002 | 0,502911                     |      |

|                   |       |                        |                    |       |          |          |                          |
|-------------------|-------|------------------------|--------------------|-------|----------|----------|--------------------------|
| TC1100000527.mm.1 | 1,39  | Mapk9                  | JUC1100002079.mm.1 | -2,45 | 0,045733 | 0,554855 |                          |
| TC1100000903.mm.1 | 1,15  | Alox12b                | JUC1100004038.mm.1 | -2,45 | 0,040284 | 0,541823 |                          |
| TC1100001596.mm.1 | 1,05  |                        | JUC1100007758.mm.1 | -2,45 | 0,045469 | 0,55427  |                          |
| TC1100002062.mm.1 | 1,4   | Narf                   | JUC1100010374.mm.1 | -2,45 | 0,010893 | 0,424403 |                          |
| TC0200001260.mm.1 | -1,21 | Olfr1029               | PSR0200009974.mm.1 | -2,46 | 0,034287 | 0,525366 | Alternative 5' Donc 0,23 |
| TC0300002459.mm.1 | 1,54  | A730011C13Rik; Gm1526  | PSR0300018912.mm.1 | -2,46 | 0,006961 | 0,395722 | Alternative 3' Acce 0,22 |
| TC0200001009.mm.1 | 1,03  | Ppig                   | PSR0200007929.mm.1 | -2,46 | 0,001779 | 0,336311 | Alternative 3' Acce 0,21 |
| TC0600001121.mm.1 | 1,07  |                        | PSR0600008778.mm.1 | -2,46 | 0,003971 | 0,360082 | Cassette Exon 0,19       |
| TC0100002471.mm.1 | 1,36  | Plekhm3                | PSR0100020065.mm.1 | -2,46 | 0,016415 | 0,458966 | Cassette Exon 0,14       |
| TC0600000902.mm.1 | 1,25  | Eva1a                  | PSR0600006780.mm.1 | -2,46 | 0,043894 | 0,550614 | Cassette Exon 0,14       |
| TC0600000902.mm.1 | 1,25  | Eva1a                  | JUC0600003407.mm.1 | -2,57 | 0,009275 | 0,41476  |                          |
| TC0Y00000364.mm.1 | 1,03  | Gm21396; Ssty2; Gm2079 | PSROY00002149.mm.1 | -2,46 | 0,025731 | 0,498198 | Cassette Exon 0,11       |
| TC1200000682.mm.1 | -1,03 | Plekhg3                | JUC1200002769.mm.1 | -2,46 | 0,004245 | 0,363417 |                          |
| TC0300000090.mm.1 | 1,08  | Lrrcc1; Gm17119        | JUC0300000152.mm.1 | -2,46 | 0,040469 | 0,542132 |                          |
| TC1200000134.mm.1 | -1,24 | Rock2                  | JUC1200000654.mm.1 | -2,46 | 0,044996 | 0,552975 |                          |
| TC1300002539.mm.1 | 1,06  | Rad17                  | JUC1300009216.mm.1 | -2,46 | 0,00888  | 0,410619 |                          |
| TC1200002392.mm.1 | 1,99  | Mok; Stk30             | JUC1200009145.mm.1 | -2,46 | 0,011024 | 0,425635 |                          |
| TC1200002392.mm.1 | 1,99  | Mok; Stk30             | JUC1200009140.mm.1 | -2,98 | 0,018482 | 0,46874  |                          |
| TC1200002392.mm.1 | 1,99  | Mok; Stk30             | JUC1200009149.mm.1 | -3,04 | 0,030046 | 0,511812 |                          |
| TC1200002392.mm.1 | 1,99  | Mok; Stk30             | JUC1200009135.mm.1 | -3,63 | 0,013601 | 0,443714 |                          |
| TC1200002392.mm.1 | 1,99  | Mok; Stk30             | JUC1200009136.mm.1 | -4,42 | 0,008708 | 0,409126 |                          |
| TC1700002030.mm.1 | -1,14 | H2-M9                  | JUC1700010341.mm.1 | -2,46 | 0,015644 | 0,455298 |                          |
| TC1500000837.mm.1 | 1,17  |                        | JUC1500003713.mm.1 | -2,46 | 0,004177 | 0,362543 |                          |
| TC0500002563.mm.1 | -1,14 | Gabra4                 | JUC0500012312.mm.1 | -2,46 | 0,009802 | 0,417839 |                          |
| TC0800000077.mm.1 | 1,07  | Myo16                  | JUC0800000352.mm.1 | -2,46 | 0,021678 | 0,483934 |                          |
| TC0800000077.mm.1 | 1,07  | Myo16                  | JUC0800000359.mm.1 | -2,6  | 0,0106   | 0,422767 |                          |
| TC0700004589.mm.1 | -1,01 | Cars                   | JUC0700020401.mm.1 | -2,46 | 0,011242 | 0,426718 |                          |
| TC0600003196.mm.1 | -1,21 | Tead4                  | JUC0600012939.mm.1 | -2,46 | 0,003575 | 0,356223 |                          |
| TC0700001791.mm.1 | 1,12  | Kdm8                   | JUC0700007979.mm.1 | -2,46 | 0,021055 | 0,480262 |                          |
| TC0400003085.mm.1 | -1    | Cyp2j13                | JUC0400012847.mm.1 | -2,46 | 0,039141 | 0,538564 |                          |
| TC1000000211.mm.1 | 1,28  | Moxd1                  | JUC1000000796.mm.1 | -2,46 | 0,013561 | 0,443675 |                          |
| TC0500002355.mm.1 | 2,76  | Kcnip4                 | PSR0500021562.mm.1 | -2,47 | 0,025275 | 0,497033 | Cassette Exon 0,1        |
| TC0500002355.mm.1 | 2,76  | Kcnip4                 | PSR0500021565.mm.1 | -3,3  | 0,046363 | 0,556304 | Cassette Exon 0,32       |
| TC0500002355.mm.1 | 2,76  | Kcnip4                 | JUC0500011767.mm.1 | -4,37 | 0,01057  | 0,422432 |                          |
| TC0500002355.mm.1 | 2,76  | Kcnip4                 | PSR0500021572.mm.1 | -5,59 | 0,006749 | 0,393343 | Cassette Exon 0,35       |
| TC0500002355.mm.1 | 2,76  | Kcnip4                 | PSR0500021570.mm.1 | -6,68 | 0,011045 | 0,425792 |                          |
| TC1100002854.mm.1 | 1,48  | Zkscan17               | PSR1100025891.mm.1 | -2,47 | 0,045524 | 0,554359 | Alternative 5' Donc 0,16 |
| TC1100002854.mm.1 | 1,48  | Zkscan17               | PSR1100025904.mm.1 | -3,27 | 0,014931 | 0,451919 | Cassette Exon 0,3        |
| TC0200000969.mm.1 | 1,42  | B3galt1                | PSR0200007681.mm.1 | -2,47 | 0,041152 | 0,544    | Cassette Exon 0,27       |
| TC0200003290.mm.1 | 1,61  | Gm13427                | JUC0200014083.mm.1 | -2,47 | 0,015748 | 0,455423 |                          |
| TC0200003290.mm.1 | 1,61  | Gm13427                | JUC0200014084.mm.1 | -2,71 | 0,039593 | 0,539903 |                          |
| TC0200003290.mm.1 | 1,61  | Gm13427                | PSR0200027918.mm.1 | -2,75 | 0,002584 | 0,349501 | Alternative 5' Donc 0,24 |
| TC0500000389.mm.1 | -1    | Hgfac                  | PSR0500003861.mm.1 | -2,47 | 0,032042 | 0,518459 | Alternative 3' Acce 0,24 |
| TC0300002522.mm.1 | 1,51  | Polr3gl                | PSR0300019631.mm.1 | -2,47 | 0,019058 | 0,471978 | Alternative 5' Donc 0,23 |
| TC0700001756.mm.1 | 1,03  | Prkcb                  | PSR0700015000.mm.1 | -2,47 | 0,031436 | 0,516647 | Alternative 5' Donc 0,23 |
| TC0700001756.mm.1 | 1,03  | Prkcb                  | JUC0700007854.mm.1 | -2,62 | 0,030246 | 0,512493 |                          |
| TC0200005089.mm.1 | -1,1  | Jph2                   | JUC0200022378.mm.1 | -2,47 | 0,019536 | 0,474538 |                          |
| TC0200005089.mm.1 | -1,1  | Jph2                   | PSR0200043399.mm.1 | -2,67 | 0,014896 | 0,451802 | Cassette Exon 0,22       |

|                   |                      |                    |       |          |                              |      |
|-------------------|----------------------|--------------------|-------|----------|------------------------------|------|
| TC0200005371.mm.1 | 1,41 Gm14406         | PSR0200045694.mm.1 | -2,47 | 0,0018   | 0,336311 Cassette Exon       | 0,16 |
| TC0700004374.mm.1 | 1,26                 | PSR0700036773.mm.1 | -2,47 | 0,044959 | 0,552881 Alternative 5' Donc | 0,15 |
| TC1200002506.mm.1 | 1,03 Dnah11          | JUC1200010467.mm.1 | -2,47 | 0,00049  | 0,298999                     |      |
| TC0200004894.mm.1 | 1,06 Rbck1           | JUC0200021482.mm.1 | -2,47 | 0,009183 | 0,413665                     |      |
| TC0100002175.mm.1 | 1,21 Ugg1            | JUC0100009820.mm.1 | -2,47 | 0,026406 | 0,501198                     |      |
| TC0100000374.mm.1 | -1,19 Stat4          | JUC0100001687.mm.1 | -2,47 | 0,035477 | 0,528724                     |      |
| TC0100000153.mm.1 | 1,06                 | JUC0100000525.mm.1 | -2,47 | 0,017365 | 0,463612                     |      |
| TC1900000907.mm.1 | 1,08 Tbc1d10c        | JUC1900004338.mm.1 | -2,47 | 0,035828 | 0,529349                     |      |
| TC0100003811.mm.1 | -1                   | JUC0100017680.mm.1 | -2,47 | 0,04971  | 0,563531                     |      |
| TC0800000391.mm.1 | 1,02                 | JUC0800001569.mm.1 | -2,47 | 0,010541 | 0,422281                     |      |
| TC0900001425.mm.1 | 1,26 Slc26a6         | PSR0900011607.mm.1 | -2,47 | 0,038944 | 0,537874                     |      |
| TC0900001425.mm.1 | 1,26 Slc26a6         | JUC0900006419.mm.1 | -3,21 | 0,02484  | 0,495465                     |      |
| TC0500001340.mm.1 | 1,11 lqcd            | JUC0500006398.mm.1 | -2,47 | 0,001956 | 0,340561                     |      |
| TC0700000924.mm.1 | 1,09                 | JUC0700004206.mm.1 | -2,47 | 0,012494 | 0,435429                     |      |
| TC0600003030.mm.1 | -1,54 Wnk1           | JUC0600012182.mm.1 | -2,47 | 0,038204 | 0,535805                     |      |
| TC0500003318.mm.1 | 1,13 Sbds            | JUC0500016363.mm.1 | -2,47 | 0,036855 | 0,532257                     |      |
| TC1100000253.mm.1 | 1,25                 | JUC1100001156.mm.1 | -2,47 | 0,0126   | 0,435933                     |      |
| TC1000002915.mm.1 | -1,2 Myrfl           | JUC1000012103.mm.1 | -2,47 | 0,007551 | 0,401384                     |      |
| TC0400001130.mm.1 | -1,06 Glis1; Gm24804 | JUC0400004075.mm.1 | -2,47 | 0,027015 | 0,502979                     |      |
| TC0400002051.mm.1 | 1 Gm13133            | JUC0400008886.mm.1 | -2,47 | 0,005207 | 0,377078                     |      |
| TC1800001749.mm.1 | 5,7 Ppp2r2b          | PSR1800009355.mm.1 | -2,48 | 0,027205 | 0,503406 Cassette Exon       | 0,27 |
| TC1800001749.mm.1 | 5,7 Ppp2r2b          | PSR1800009368.mm.1 | -2,66 | 0,018077 | 0,46716 Alternative 3' Acce  | 0,32 |
| TC1800001749.mm.1 | 5,7 Ppp2r2b          | PSR1800009378.mm.1 | -2,93 | 0,018811 | 0,470836 Alternative 5' Donc | 0,41 |
| TC1800001749.mm.1 | 5,7 Ppp2r2b          | PSR1800009366.mm.1 | -3,57 | 0,008384 | 0,4065 Alternative 3' Acce   | 0,13 |
| TC1800001749.mm.1 | 5,7 Ppp2r2b          | JUC1800005216.mm.1 | -3,65 | 0,006433 | 0,389994                     |      |
| TC1800001749.mm.1 | 5,7 Ppp2r2b          | PSR1800009369.mm.1 | -3,75 | 0,00721  | 0,398126 Alternative 3' Acce | 0,32 |
| TC1800001749.mm.1 | 5,7 Ppp2r2b          | PSR1800009393.mm.1 | -3,94 | 0,000092 | 0,255472 Cassette Exon       | 0,27 |
| TC1800001749.mm.1 | 5,7 Ppp2r2b          | PSR1800009365.mm.1 | -4,18 | 0,00147  | 0,329052 Alternative 3' Acce | 0,13 |
| TC1800001749.mm.1 | 5,7 Ppp2r2b          | JUC1800005212.mm.1 | -4,44 | 0,007332 | 0,399002                     |      |
| TC1800001749.mm.1 | 5,7 Ppp2r2b          | PSR1800009372.mm.1 | -4,49 | 0,003831 | 0,358553 Alternative 5' Donc | 0,49 |
| TC1800001749.mm.1 | 5,7 Ppp2r2b          | PSR1800009356.mm.1 | -4,57 | 0,037856 | 0,534804 Alternative 3' Acce | 0,48 |
| TC1800001749.mm.1 | 5,7 Ppp2r2b          | PSR1800009385.mm.1 | -4,66 | 0,006795 | 0,393554 Cassette Exon       | 0,28 |
| TC1800001749.mm.1 | 5,7 Ppp2r2b          | PSR1800009374.mm.1 | -5,29 | 0,00174  | 0,335996 Cassette Exon       | 0,29 |
| TC1800001749.mm.1 | 5,7 Ppp2r2b          | PSR1800009394.mm.1 | -5,72 | 0,001356 | 0,325441 Cassette Exon       | 0,27 |
| TC1800001749.mm.1 | 5,7 Ppp2r2b          | PSR1800009380.mm.1 | -5,76 | 0,004132 | 0,3623 Alternative 5' Donc   | 0,41 |
| TC1800001749.mm.1 | 5,7 Ppp2r2b          | JUC1800005222.mm.1 | -6,07 | 0,000644 | 0,304044                     |      |
| TC1800001749.mm.1 | 5,7 Ppp2r2b          | PSR1800009383.mm.1 | -6,08 | 0,001649 | 0,333988 Cassette Exon       | 0,28 |
| TC1800001749.mm.1 | 5,7 Ppp2r2b          | PSR1800009384.mm.1 | -6,38 | 0,032916 | 0,521149 Cassette Exon       | 0,28 |
| TC1800001749.mm.1 | 5,7 Ppp2r2b          | PSR1800009386.mm.1 | -6,42 | 0,001195 | 0,321568 Cassette Exon       | 0,28 |
| TC1800001749.mm.1 | 5,7 Ppp2r2b          | PSR1800009377.mm.1 | -6,86 | 0,003135 | 0,353892 Alternative 5' Donc | 0,45 |
| TC1800001749.mm.1 | 5,7 Ppp2r2b          | PSR1800009379.mm.1 | -6,88 | 0,001303 | 0,323504 Alternative 5' Donc | 0,41 |
| TC1800001749.mm.1 | 5,7 Ppp2r2b          | PSR1800009382.mm.1 | -7,6  | 0,003897 | 0,359372                     |      |
| TC1100002099.mm.1 | 6,48 Osbp2           | PSR1100020376.mm.1 | -2,48 | 0,000892 | 0,313363 Alternative 3' Acce | 0,22 |
| TC1100002099.mm.1 | 6,48 Osbp2           | JUC1100010636.mm.1 | -2,66 | 0,001379 | 0,32572                      |      |
| TC1100002099.mm.1 | 6,48 Osbp2           | JUC1100020379.mm.1 | -2,76 | 0,009166 | 0,413447 Cassette Exon       | 0,16 |
| TC1100002099.mm.1 | 6,48 Osbp2           | PSR1100010644.mm.1 | -3,03 | 0,013184 | 0,440686                     |      |
| TC1100002099.mm.1 | 6,48 Osbp2           | PSR1100020381.mm.1 | -4,33 | 0,024294 | 0,49362 Cassette Exon        | 0,28 |
| TC1100002099.mm.1 | 6,48 Osbp2           | PSR1100020382.mm.1 | -5,15 | 0,007797 | 0,403089 Cassette Exon       | 0,42 |

|                   |                            |                    |        |          |          |                     |      |
|-------------------|----------------------------|--------------------|--------|----------|----------|---------------------|------|
| TC1100002099.mm.1 | 6,48 Osbp2                 | JUC1100010645.mm.1 | -5,74  | 0,012721 | 0,43654  |                     |      |
| TC1100002099.mm.1 | 6,48 Osbp2                 | PSR1100020384.mm.1 | -5,94  | 0,011273 | 0,426793 | Cassette Exon       | 0,07 |
| TC1100002099.mm.1 | 6,48 Osbp2                 | PSR1100020383.mm.1 | -6,96  | 0,009786 | 0,417839 | Cassette Exon       | 0,07 |
| TC1100002099.mm.1 | 6,48 Osbp2                 | PSR1100020387.mm.1 | -7,82  | 0,004867 | 0,371692 | Cassette Exon       | 0,32 |
| TC1100002099.mm.1 | 6,48 Osbp2                 | JUC1100010641.mm.1 | -8,86  | 0,011067 | 0,425887 |                     |      |
| TC1100002099.mm.1 | 6,48 Osbp2                 | PSR1100020386.mm.1 | -10,31 | 0,008058 | 0,40448  | Cassette Exon       | 0,32 |
| TC1200001813.mm.1 | 1,12 Sec23a                | PSR1200012408.mm.1 | -2,48  | 0,0025   | 0,349189 | Intron Retention    | 0,37 |
| TC0800002618.mm.1 | 1,76 Neto2                 | JUC0800010931.mm.1 | -2,48  | 0,027468 | 0,504083 |                     |      |
| TC0800002618.mm.1 | 1,76 Neto2                 | PSR0800020127.mm.1 | -2,74  | 0,00988  | 0,418011 | Alternative 5' Donc | 0,31 |
| TC0800002618.mm.1 | 1,76 Neto2                 | PSR0800020134.mm.1 | -2,9   | 0,017167 | 0,46232  | Cassette Exon       | 0,25 |
| TC0800002618.mm.1 | 1,76 Neto2                 | JUC0800010933.mm.1 | -3,73  | 0,00043  | 0,297771 |                     |      |
| TC0600002354.mm.1 | 2,79 Vopp1                 | PSR0600018365.mm.1 | -2,48  | 0,009126 | 0,413316 | Cassette Exon       | 0,27 |
| TC0600002354.mm.1 | 2,79 Vopp1                 | PSR0600018366.mm.1 | -2,61  | 0,00982  | 0,417839 | Cassette Exon       | 0,15 |
| TC0600002354.mm.1 | 2,79 Vopp1                 | JUC0600009589.mm.1 | -5,37  | 0,025147 | 0,496499 |                     |      |
| TC0300000224.mm.1 | 1,46 Mfn1                  | PSR0300001313.mm.1 | -2,48  | 0,022613 | 0,487423 | Alternative 5' Donc | 0,24 |
| TC1800001340.mm.1 | 1,49 Cep120                | PSR1800009853.mm.1 | -2,48  | 0,008207 | 0,405909 | Alternative 3' Acce | 0,21 |
| TC1900001683.mm.1 | 2,01 Bbip1                 | JUC1900008219.mm.1 | -2,48  | 0,016445 | 0,459051 |                     |      |
| TC1900001683.mm.1 | 2,01 Bbip1                 | PSR1900014806.mm.1 | -2,73  | 0,01108  | 0,42589  | Cassette Exon       | 0,16 |
| TC1900001683.mm.1 | 2,01 Bbip1                 | JUC1900008215.mm.1 | -2,77  | 0,001817 | 0,336896 |                     |      |
| TC1900001683.mm.1 | 2,01 Bbip1                 | PSR1900014798.mm.1 | -2,98  | 0,011569 | 0,429011 | Alternative 3' Acce | 0,18 |
| TC1900001683.mm.1 | 2,01 Bbip1                 | JUC1900008220.mm.1 | -8,09  | 0,001625 | 0,332831 |                     |      |
| TC1100003407.mm.1 | 1,4 Tada2a                 | JUC1100016287.mm.1 | -2,48  | 0,002235 | 0,34578  |                     |      |
| TC1100003407.mm.1 | 1,4 Tada2a                 | PSR1100031182.mm.1 | -2,49  | 0,042    | 0,546097 | Cassette Exon       | 0,15 |
| TC1600001320.mm.1 | -1,13 Cdc45                | PSR1600010896.mm.1 | -2,48  | 0,022143 | 0,485609 | Cassette Exon       | 0,15 |
| TC0500000309.mm.1 | 1,16 Tcf23                 | PSR0500002630.mm.1 | -2,48  | 0,0371   | 0,532885 | Cassette Exon       | 0,14 |
| TC0600001968.mm.1 | 1,66 Lrrc4                 | PSR0600015439.mm.1 | -2,48  | 0,025221 | 0,496772 | Alternative 5' Donc | 0,14 |
| TC1700001595.mm.1 | 1,31 Zfp13                 | PSR1700013916.mm.1 | -2,48  | 0,011342 | 0,427345 | Cassette Exon       | 0,14 |
| TC0600001875.mm.1 | 1,34 B630005N14Rik         | PSR0600014773.mm.1 | -2,48  | 0,013393 | 0,442454 | Alternative 5' Donc | 0,13 |
| TC0200002851.mm.1 | 1,34 Hspa14                | PSR0200023660.mm.1 | -2,48  | 0,006562 | 0,39213  | Cassette Exon       | 0,12 |
| TC0200002851.mm.1 | 1,34 Hspa14                | JUC0200011986.mm.1 | -2,57  | 0,008909 | 0,410728 |                     |      |
| TC0500000374.mm.1 | 1,46 Fam193a               | PSR0500003600.mm.1 | -2,48  | 0,043722 | 0,550256 | Cassette Exon       | 0,12 |
| TC0500003157.mm.1 | 1,03 AW549542; Gm2301; Tbx | PSR0500027974.mm.1 | -2,48  | 0,041938 | 0,545823 | Alternative 5' Donc | 0,11 |
| TC0200002842.mm.1 | -1,25 Gm14496              | JUC0200011947.mm.1 | -2,48  | 0,025302 | 0,497227 |                     |      |
| TC0200003164.mm.1 | -1,12 Tmem141              | JUC0200013269.mm.1 | -2,48  | 0,036448 | 0,531024 |                     |      |
| TC1200000500.mm.1 | 1,8 Pnn                    | JUC1200001939.mm.1 | -2,48  | 0,002898 | 0,352207 |                     |      |
| TC1300002121.mm.1 | 1,06 Spata31d1a            | JUC1300007043.mm.1 | -2,48  | 0,014318 | 0,448086 |                     |      |
| TC0800003241.mm.1 | 1,6 2610005L07Rik          | JUC0800007907.mm.1 | -2,48  | 0,038904 | 0,537874 |                     |      |
| TC0800000378.mm.1 | -1,09 Nrg1                 | JUC0800001550.mm.1 | -2,48  | 0,015277 | 0,453131 |                     |      |
| TC0900001065.mm.1 | -1 Gm3211                  | JUC0900004568.mm.1 | -2,48  | 0,003672 | 0,357266 |                     |      |
| TC0800002458.mm.1 | 1,14 Eps15l1               | JUC0800010255.mm.1 | -2,48  | 0,024985 | 0,496025 |                     |      |
| TC0600001442.mm.1 | -1,02 Acrbp; Ing4          | JUC0600006161.mm.1 | -2,48  | 0,019628 | 0,474852 |                     |      |
| TC1100001088.mm.1 | 1,34 Gm16075               | JUC1100005241.mm.1 | -2,48  | 0,020787 | 0,479453 |                     |      |
| TC1000002228.mm.1 | 1,12                       | JUC1000008463.mm.1 | -2,48  | 0,012506 | 0,435429 |                     |      |
| TC0300002472.mm.1 | -1,09 Prune                | JUC0300009952.mm.1 | -2,48  | 0,02562  | 0,497926 |                     |      |
| TC1100001948.mm.1 | 1,4 Gm11731                | JUC1100009663.mm.1 | -2,48  | 0,044776 | 0,552442 |                     |      |
| TC0X00002236.mm.1 | -1,24 Fam122b              | JUC0X00007251.mm.1 | -2,48  | 0,02861  | 0,507714 |                     |      |
| TC0X00002236.mm.1 | -1,24 Fam122b              | JUC0X00007250.mm.1 | -5,27  | 0,033215 | 0,522175 |                     |      |
| TC0400001639.mm.1 | 2,25 Stmn1; Gm23634        | PSR0400013046.mm.1 | -2,49  | 0,015352 | 0,453763 | Intron Retention    | 0,35 |

|                   |                              |                    |       |          |                              |      |
|-------------------|------------------------------|--------------------|-------|----------|------------------------------|------|
| TC1200000803.mm.1 | 1,64 Dnal1                   | PSR1200005744.mm.1 | -2,49 | 0,017867 | 0,466232 Alternative 5' Donc | 0,24 |
| TC1200000803.mm.1 | 1,64 Dnal1                   | JUC1200003250.mm.1 | -2,68 | 0,032907 | 0,521149                     |      |
| TC1300001995.mm.1 | 2,1                          | PSR1300012428.mm.1 | -2,49 | 0,004609 | 0,369794 Alternative 3' Acce | 0,24 |
| TC1500001977.mm.1 | 1,5 Ttl1                     | PSR1500015604.mm.1 | -2,49 | 0,024575 | 0,4943 Alternative 3' Acce   | 0,18 |
| TC0700000997.mm.1 | 1,16 Lins                    | PSR0700009143.mm.1 | -2,49 | 0,011711 | 0,429969 Cassette Exon       | 0,15 |
| TC0400002426.mm.1 | -1,08 Gm17094                | PSR0400019589.mm.1 | -2,49 | 0,048395 | 0,56064 Cassette Exon        | 0,14 |
| TC1700001521.mm.1 | -1,03 Has1                   | PSR1700013567.mm.1 | -2,49 | 0,022879 | 0,488524 Cassette Exon       | 0,14 |
| TC1400000116.mm.1 | -1,12                        | JUC1400000558.mm.1 | -2,49 | 0,035332 | 0,528404                     |      |
| TC0200002833.mm.1 | 1,02 Tcea2                   | JUC0200011870.mm.1 | -2,49 | 0,004079 | 0,362111                     |      |
| TC1400000786.mm.1 | 1,26 Rec8                    | JUC1400003398.mm.1 | -2,49 | 0,002165 | 0,344238                     |      |
| TC1400000786.mm.1 | 1,26 Rec8                    | JUC1400003396.mm.1 | -2,64 | 0,007372 | 0,39943                      |      |
| TC0200004440.mm.1 | 1,11 Oip5                    | JUC0200018997.mm.1 | -2,49 | 0,006748 | 0,393343                     |      |
| TC1300001127.mm.1 | 1,11                         | JUC1300003728.mm.1 | -2,49 | 0,03919  | 0,538692                     |      |
| TC0700001383.mm.1 | 1,18 Map6                    | JUC0700006060.mm.1 | -2,49 | 0,013954 | 0,446239                     |      |
| TC0300002551.mm.1 | -1,38 Hsd3b4; Gm10681; Gm44! | JUC0300010368.mm.1 | -2,49 | 0,002469 | 0,349135                     |      |
| TC0300002551.mm.1 | -1,38 Hsd3b4; Gm10681; Gm44! | JUC0300010373.mm.1 | -2,74 | 0,018966 | 0,471398                     |      |
| TC1800000300.mm.1 | 3,81 Reep2                   | JUC1800001306.mm.1 | -2,5  | 0,02503  | 0,496091                     |      |
| TC1800000300.mm.1 | 3,81 Reep2                   | PSR1800002198.mm.1 | -2,54 | 0,002563 | 0,349501 Cassette Exon       | 0,25 |
| TC1800000300.mm.1 | 3,81 Reep2                   | JUC1800001310.mm.1 | -2,71 | 0,001471 | 0,329052                     |      |
| TC1800000300.mm.1 | 3,81 Reep2                   | JUC1800001308.mm.1 | -3,11 | 0,00878  | 0,409822                     |      |
| TC1800000300.mm.1 | 3,81 Reep2                   | PSR1800002197.mm.1 | -3,4  | 0,010421 | 0,42148 Cassette Exon        | 0,25 |
| TC1800000300.mm.1 | 3,81 Reep2                   | PSR1800002203.mm.1 | -5,39 | 0,000228 | 0,28803 Alternative 3' Acce  | 0,49 |
| TC0200002858.mm.1 | 1,33 Gm13187; LOC102639987   | PSR0200023722.mm.1 | -2,5  | 0,020924 | 0,479862 Alternative 5' Donc | 0,22 |
| TC1200002119.mm.1 | 1,11 Noxred1                 | JUC1200008095.mm.1 | -2,5  | 0,037212 | 0,533267                     |      |
| TC1300000618.mm.1 | 1,1 Gm2762                   | JUC1300002019.mm.1 | -2,5  | 0,034443 | 0,525886                     |      |
| TC0200002436.mm.1 | -1,06 Arhgap40               | JUC0200010033.mm.1 | -2,5  | 0,004775 | 0,371044                     |      |
| TC0100002139.mm.1 | 1,07                         | JUC0100009736.mm.1 | -2,5  | 0,002041 | 0,341377                     |      |
| TC1800001539.mm.1 | 1,36 4930503L19Rik           | JUC1800006288.mm.1 | -2,5  | 0,02049  | 0,478019                     |      |
| TC1500001791.mm.1 | 1,26 Arhgap39                | JUC1500007951.mm.1 | -2,5  | 0,009048 | 0,412827                     |      |
| TC1500001791.mm.1 | 1,26 Arhgap39                | JUC1500007952.mm.1 | -2,61 | 0,00248  | 0,349135                     |      |
| TC1500000650.mm.1 | -1,05 1700041B01Rik          | JUC1500002707.mm.1 | -2,5  | 0,010431 | 0,421581                     |      |
| TC0800000194.mm.1 | 1,38                         | JUC0800000923.mm.1 | -2,5  | 0,03469  | 0,526294                     |      |
| TC0900000335.mm.1 | 1,03                         | JUC0900001335.mm.1 | -2,5  | 0,007401 | 0,399784                     |      |
| TC0700000070.mm.1 | 1,54 Zfp444                  | JUC0700000368.mm.1 | -2,5  | 0,02177  | 0,48438                      |      |
| TC0700000070.mm.1 | 1,54 Zfp444                  | JUC0700000369.mm.1 | -2,56 | 0,01848  | 0,468729                     |      |
| TC0500002965.mm.1 | -1,33 Vmn2r14                | JUC0500014316.mm.1 | -2,5  | 0,015741 | 0,455416                     |      |
| TC0700003493.mm.1 | 1,31 Chd2; 1810026B05Rik; RP | JUC0700015681.mm.1 | -2,5  | 0,011799 | 0,430307                     |      |
| TC0700001821.mm.1 | 1,07 Doc2a                   | JUC0700008165.mm.1 | -2,5  | 0,023761 | 0,491689                     |      |
| TC0700001821.mm.1 | 1,07 Doc2a                   | JUC0700008154.mm.1 | -2,85 | 0,017668 | 0,464755                     |      |
| TC1000002677.mm.1 | 1,46 Rmst; Gm3515            | JUC1000011236.mm.1 | -2,5  | 0,020755 | 0,479262                     |      |
| TC0300001423.mm.1 | 1,34 Tspan5                  | JUC0300006035.mm.1 | -2,5  | 0,019744 | 0,474932                     |      |
| TC0900002164.mm.1 | 1,53 Trappc4                 | JUC0900010131.mm.1 | -2,5  | 0,045415 | 0,554105                     |      |
| TC0200003359.mm.1 | 1,06 Al182371                | PSR0200028883.mm.1 | -2,51 | 0,042126 | 0,546571 Alternative 5' Donc | 0,25 |
| TC0300001110.mm.1 | 3,91 Al504432                | PSR0300009046.mm.1 | -2,51 | 0,03221  | 0,518852 Alternative 5' Donc | 0,22 |
| TC1100000544.mm.1 | 2,03 Hnrnph1                 | PSR1100004217.mm.1 | -2,51 | 0,016049 | 0,457283 Alternative 5' Donc | 0,18 |
| TC1100000544.mm.1 | 2,03 Hnrnph1                 | JUC1100002197.mm.1 | -2,64 | 0,042675 | 0,548097                     |      |
| TC1800001063.mm.1 | 1,6 Nol4                     | PSR1800007846.mm.1 | -2,51 | 0,027294 | 0,503732 Alternative 3' Acce | 0,18 |
| TC1800001063.mm.1 | 1,6 Nol4                     | JUC1800004383.mm.1 | -3,39 | 0,01911  | 0,47227                      |      |

|                   |                       |                    |        |          |                              |      |
|-------------------|-----------------------|--------------------|--------|----------|------------------------------|------|
| TC0X00000723.mm.1 | 1,19 Xlr3d-ps         | PSR0X00005013.mm.1 | -2,51  | 0,005773 | 0,383104 Cassette Exon       | 0,15 |
| TC0300001150.mm.1 | 1,43 Wdr47            | PSR0300009367.mm.1 | -2,51  | 0,005462 | 0,379939 Cassette Exon       | 0,14 |
| TC1200000596.mm.1 | -1,24 Frmd6           | JUC1200002234.mm.1 | -2,51  | 0,04374  | 0,550304                     |      |
| TC1500000856.mm.1 | 1,06 Mov10l1          | JUC1500003778.mm.1 | -2,51  | 0,042814 | 0,548097                     |      |
| TC0200000783.mm.1 | 1,09 Mbd5             | JUC0200003325.mm.1 | -2,51  | 0,037715 | 0,534585                     |      |
| TC0500002879.mm.1 | 1,4 Khlh8             | JUC0500013826.mm.1 | -2,51  | 0,010172 | 0,419711                     |      |
| TC1100001047.mm.1 | -1,17 Cluh            | JUC1100004968.mm.1 | -2,51  | 0,007401 | 0,399784                     |      |
| TC1100002804.mm.1 | 1,22 2010001A14Rik    | JUC1100013199.mm.1 | -2,51  | 0,009493 | 0,416578                     |      |
| TC0900003138.mm.1 | -1,2 Arpp21           | JUC0900014965.mm.1 | -2,51  | 0,036916 | 0,5323                       |      |
| TC0X00002059.mm.1 | 1,62 Upf3b            | JUC0X00006666.mm.1 | -2,51  | 0,016774 | 0,460519                     |      |
| TC0700003184.mm.1 | 8,18 Gm25088          | PSR0700028373.mm.1 | -2,52  | 0,00013  | 0,270905 Alternative 5' Donc | 0,24 |
| TC0700003184.mm.1 | 8,18 Gm25088          | PSR0700028371.mm.1 | -6,96  | 0,00004  | 0,245341 Alternative 3' Acce | 0,49 |
| TC1900000084.mm.1 | -1,01 Gm20417         | PSR1900001010.mm.1 | -2,52  | 0,047155 | 0,557948 Intron Retention    | 0,16 |
| TC1900000084.mm.1 | -1,01 Gm20417         | PSR1900001005.mm.1 | -3,2   | 0,018813 | 0,470836 Alternative 3' Acce | 0,33 |
| TC1800001477.mm.1 | 8,9 Cplx4             | JUC1800006079.mm.1 | -2,52  | 0,012047 | 0,432362                     |      |
| TC1800001477.mm.1 | 8,9 Cplx4             | PSR1800010883.mm.1 | -2,55  | 0,001601 | 0,332773 Alternative 5' Donc | 0,24 |
| TC1100003233.mm.1 | 3,43 Doc2b            | PSR1100029738.mm.1 | -2,52  | 0,009888 | 0,418122 Cassette Exon       | 0,21 |
| TC1100003233.mm.1 | 3,43 Doc2b            | JUC1100015562.mm.1 | -2,59  | 0,038796 | 0,537586                     |      |
| TC1100003233.mm.1 | 3,43 Doc2b            | JUC1100015555.mm.1 | -4,79  | 0,001427 | 0,327447                     |      |
| TC0100002741.mm.1 | 2,28 Mir3535; Gm24148 | PSR0100022176.mm.1 | -2,52  | 0,045493 | 0,55435 Cassette Exon        | 0,1  |
| TC0100002741.mm.1 | 2,28 Mir3535; Gm24148 | PSR0100022175.mm.1 | -2,83  | 0,012309 | 0,434392 Cassette Exon       | 0,17 |
| TC0600000328.mm.1 | 1,41 Bpgm             | PSR0600002434.mm.1 | -2,52  | 0,013062 | 0,439579 Cassette Exon       | 0,15 |
| TC0100002588.mm.1 | 1,39 Rnf25            | JUC0100011848.mm.1 | -2,52  | 0,000751 | 0,308185                     |      |
| TC0200002380.mm.1 | 1,49 Cep250           | JUC0200009655.mm.1 | -2,52  | 0,005359 | 0,378582                     |      |
| TC1600001379.mm.1 | 1,08 Etv5             | JUC1600005956.mm.1 | -2,52  | 0,023919 | 0,492324                     |      |
| TC0500003713.mm.1 | 1,31 Ccdc62           | JUC0500007014.mm.1 | -2,52  | 0,017086 | 0,462201                     |      |
| TC0500003713.mm.1 | 1,31 Ccdc62           | JUC0500007007.mm.1 | -3,24  | 0,018915 | 0,471305                     |      |
| TC0600000948.mm.1 | -1,23 Dysf            | JUC0600003711.mm.1 | -2,52  | 0,018098 | 0,46716                      |      |
| TC1100001641.mm.1 | 1,21 Mlx              | JUC1100007911.mm.1 | -2,52  | 0,040882 | 0,543423                     |      |
| TC0X00000675.mm.1 | -1,09 Xlr5b           | JUC0X00002160.mm.1 | -2,52  | 0,004034 | 0,361636                     |      |
| TC0400002120.mm.1 | -1,24 Tmem68          | JUC0400009376.mm.1 | -2,52  | 0,00298  | 0,352501                     |      |
| TC0200003759.mm.1 | 4,07 Chn1             | JUC0200016416.mm.1 | -2,53  | 0,012701 | 0,43642                      |      |
| TC0200003759.mm.1 | 4,07 Chn1             | PSR0200032168.mm.1 | -2,7   | 0,039943 | 0,540973 Cassette Exon       | 0,02 |
| TC0200003759.mm.1 | 4,07 Chn1             | PSR0200032135.mm.1 | -2,76  | 0,028682 | 0,508019 Alternative 3' Acce | 0,29 |
| TC0200003759.mm.1 | 4,07 Chn1             | PSR0200032162.mm.1 | -2,93  | 0,017691 | 0,465026 Cassette Exon       | 0,42 |
| TC0200003759.mm.1 | 4,07 Chn1             | JUC0200016418.mm.1 | -3,39  | 0,038977 | 0,53792                      |      |
| TC0200003759.mm.1 | 4,07 Chn1             | PSR0200032167.mm.1 | -3,84  | 0,000789 | 0,310805 Cassette Exon       | 0,4  |
| TC0200003759.mm.1 | 4,07 Chn1             | PSR0200032151.mm.1 | -3,98  | 0,018936 | 0,471376 Cassette Exon       | 0,27 |
| TC0200003759.mm.1 | 4,07 Chn1             | PSR0200032147.mm.1 | -4,2   | 0,019414 | 0,473856 Alternative 5' Donc | 0,48 |
| TC0200003759.mm.1 | 4,07 Chn1             | PSR0200032148.mm.1 | -4,63  | 0,016208 | 0,458312 Alternative 5' Donc | 0,48 |
| TC0200003759.mm.1 | 4,07 Chn1             | JUC0200016417.mm.1 | -4,85  | 0,014262 | 0,447947                     |      |
| TC0200003759.mm.1 | 4,07 Chn1             | PSR0200032169.mm.1 | -5,36  | 0,015054 | 0,452223 Cassette Exon       | 0,37 |
| TC0200003759.mm.1 | 4,07 Chn1             | PSR0200032133.mm.1 | -5,74  | 0,00629  | 0,388922 Alternative 3' Acce | 0,28 |
| TC0200003759.mm.1 | 4,07 Chn1             | PSR0200032134.mm.1 | -7,13  | 0,013322 | 0,441836 Alternative 3' Acce | 0,29 |
| TC0200003759.mm.1 | 4,07 Chn1             | PSR0200032165.mm.1 | -8,28  | 0,004948 | 0,373364 Cassette Exon       | 0,35 |
| TC0200003759.mm.1 | 4,07 Chn1             | JUC0200016424.mm.1 | -8,74  | 0,020731 | 0,479166                     |      |
| TC0200003759.mm.1 | 4,07 Chn1             | PSR0200032157.mm.1 | -9,85  | 0,003922 | 0,359818 Alternative 5' Donc | 0,36 |
| TC0200003759.mm.1 | 4,07 Chn1             | JUC0200016426.mm.1 | -10,01 | 0,037084 | 0,532836                     |      |



|                   |                             |                    |       |          |                              |      |
|-------------------|-----------------------------|--------------------|-------|----------|------------------------------|------|
| TC1100002118.mm.1 | 3,83 Gm11961                | PSR1100020568.mm.1 | -2,53 | 0,000056 | 0,24627 Cassette Exon        | 0,16 |
| TC1100002118.mm.1 | 3,83 Gm11961                | JUC1100010749.mm.1 | -2,8  | 0,005529 | 0,380518                     |      |
| TC1100002118.mm.1 | 3,83 Gm11961                | PSR1100020569.mm.1 | -4,09 | 0,002719 | 0,349612 Cassette Exon       | 0,28 |
| TC1100002118.mm.1 | 3,83 Gm11961                | PSR1100020570.mm.1 | -5,14 | 0,008258 | 0,405976 Cassette Exon       | 0,28 |
| TC0200002827.mm.1 | 1,66 Dnajc5                 | PSR0200023340.mm.1 | -2,53 | 0,006581 | 0,39213 Cassette Exon        | 0,26 |
| TC0200002827.mm.1 | 1,66 Dnajc5                 | JUC0200011825.mm.1 | -3,17 | 0,013938 | 0,446202                     |      |
| TC0200002827.mm.1 | 1,66 Dnajc5                 | JUC0200011830.mm.1 | -3,66 | 0,032056 | 0,518469                     |      |
| TC1500000045.mm.1 | 1,01 Lifr                   | PSR1500000401.mm.1 | -2,53 | 0,009793 | 0,417839 Alternative 3' Acce | 0,25 |
| TC0700004575.mm.1 | 1,08 Th                     | PSR0700038595.mm.1 | -2,53 | 0,006308 | 0,389234 Alternative 3' Acce | 0,24 |
| TC0900000496.mm.1 | 2,44 Thy1                   | PSR0900003239.mm.1 | -2,53 | 0,041396 | 0,544608 Cassette Exon       | 0,15 |
| TC0900000496.mm.1 | 2,44 Thy1                   | PSR0900003243.mm.1 | -2,6  | 0,025604 | 0,497821 Cassette Exon       | 0,23 |
| TC0900000496.mm.1 | 2,44 Thy1                   | PSR0900003240.mm.1 | -3,13 | 0,020853 | 0,479521 Cassette Exon       | 0,23 |
| TC1700002815.mm.1 | -1,41 C4a                   | PSR1700018078.mm.1 | -2,53 | 0,042167 | 0,546785 Cassette Exon       | 0,2  |
| TC1600000346.mm.1 | -1,23 Rtp4                  | PSR1600003433.mm.1 | -2,53 | 0,021306 | 0,481714 Cassette Exon       | 0,18 |
| TC0100003315.mm.1 | 1,79 Fam163a                | PSR0100027074.mm.1 | -2,53 | 0,034678 | 0,526294 Cassette Exon       | 0,14 |
| TC0100003315.mm.1 | 1,79 Fam163a                | PSR0100027072.mm.1 | -2,82 | 0,026946 | 0,50274 Cassette Exon        | 0,17 |
| TC0600000968.mm.1 | 1,81 Alms1-ps2              | PSR0600007501.mm.1 | -2,53 | 0,003556 | 0,356223 Cassette Exon       | 0,16 |
| TC0600000968.mm.1 | 1,81 Alms1-ps2              | JUC0600003832.mm.1 | -3,67 | 0,007102 | 0,396897                     |      |
| TC0500001011.mm.1 | 1,12 Aff1                   | PSR0500008542.mm.1 | -2,53 | 0,027562 | 0,50444 Cassette Exon        | 0,15 |
| TC1100003870.mm.1 | 1,05 Map3k14; 1700028N14Ril | JUC1100018890.mm.1 | -2,53 | 0,01385  | 0,445398                     |      |
| TC1300002172.mm.1 | 1,16 Gm5665                 | JUC1300007249.mm.1 | -2,53 | 0,015914 | 0,456623                     |      |
| TC0200004595.mm.1 | 1,14 Gm14029                | JUC0200020399.mm.1 | -2,53 | 0,024555 | 0,494116                     |      |
| TC0200001781.mm.1 | 1,09 Tyro3                  | JUC0200006673.mm.1 | -2,53 | 0,047995 | 0,559574                     |      |
| TC0200002177.mm.1 | 1,76 Kiz; Plk1s1            | JUC0200008687.mm.1 | -2,53 | 0,033273 | 0,522325                     |      |
| TC0600000576.mm.1 | -1,19 Svs1                  | JUC0600002247.mm.1 | -2,53 | 0,027088 | 0,503022                     |      |
| TC0600002714.mm.1 | 1,17 Ccdc37                 | JUC0600010922.mm.1 | -2,53 | 0,00108  | 0,317191                     |      |
| TC0600001528.mm.1 | -1,4 Klrbl1-ps1             | JUC0600006554.mm.1 | -2,53 | 0,01484  | 0,451311                     |      |
| TC0400002712.mm.1 | 4,25 Frs1                   | PSR0400021922.mm.1 | -2,54 | 0,004883 | 0,372195 Alternative 3' Acce | 0,36 |
| TC0400002712.mm.1 | 4,25 Frs1                   | JUC0400011365.mm.1 | -2,54 | 0,041189 | 0,544121                     |      |
| TC0400002712.mm.1 | 4,25 Frs1                   | JUC0400011364.mm.1 | -3,11 | 0,001726 | 0,335996                     |      |
| TC0400002712.mm.1 | 4,25 Frs1                   | PSR0400021930.mm.1 | -3,89 | 0,003588 | 0,356223 Cassette Exon       | 0,33 |
| TC0400002712.mm.1 | 4,25 Frs1                   | PSR0400021923.mm.1 | -4,29 | 0,021798 | 0,484444 Alternative 3' Acce | 0,36 |
| TC0400002712.mm.1 | 4,25 Frs1                   | PSR0400021931.mm.1 | -4,58 | 0,010508 | 0,422115 Cassette Exon       | 0,27 |
| TC1100004301.mm.1 | -1,04 Trim47                | PSR1100038674.mm.1 | -2,54 | 0,01864  | 0,470078 Alternative 5' Donc | 0,25 |
| TC1700001893.mm.1 | 1,38 Ring1                  | PSR1700017631.mm.1 | -2,54 | 0,024945 | 0,495859 Alternative 3' Acce | 0,19 |
| TC0900003334.mm.1 | -1,05 Acad11                | PSR0900010260.mm.1 | -2,54 | 0,03135  | 0,516281 Alternative 5' Donc | 0,16 |
| TC1600002128.mm.1 | -1,41 Erg                   | PSR1600016347.mm.1 | -2,54 | 0,026745 | 0,502096 Cassette Exon       | 0,16 |
| TC1700000980.mm.1 | 1,23                        | PSR1700009371.mm.1 | -2,54 | 0,030693 | 0,513934 Cassette Exon       | 0,15 |
| TC0200003873.mm.1 | 1,36 Tmx2                   | PSR0200033525.mm.1 | -2,54 | 0,047066 | 0,557783 Cassette Exon       | 0,14 |
| TC1700001323.mm.1 | -1,21 Ston1                 | PSR1700012075.mm.1 | -2,54 | 0,005001 | 0,373851 Cassette Exon       | 0,14 |
| TC1400000833.mm.1 | 1,11 Rcbtb1                 | JUC1400003685.mm.1 | -2,54 | 0,038697 | 0,537187                     |      |
| TC0200004366.mm.1 | -1,01 Arhgap11a             | JUC0200018671.mm.1 | -2,54 | 0,007812 | 0,403089                     |      |
| TC1700000864.mm.1 | -1,32 Nfkbie                | JUC1700004428.mm.1 | -2,54 | 0,012982 | 0,439245                     |      |
| TC1500002181.mm.1 | 1,58 Adcy6                  | JUC1500010094.mm.1 | -2,54 | 0,001471 | 0,329052                     |      |
| TC1500001935.mm.1 | 1,02 Desi1                  | JUC1500008636.mm.1 | -2,54 | 0,002531 | 0,349501                     |      |
| TC1500002031.mm.1 | 1,23 Alg12                  | JUC1500009127.mm.1 | -2,54 | 0,030991 | 0,514765                     |      |
| TC1700000347.mm.1 | -1,1 Zfp598                 | JUC1700001464.mm.1 | -2,54 | 0,036877 | 0,532257                     |      |
| TC0800001057.mm.1 | 1,28                        | JUC0800004374.mm.1 | -2,54 | 0,004589 | 0,369794                     |      |

|                   |       |                |                    |       |          |          |                          |
|-------------------|-------|----------------|--------------------|-------|----------|----------|--------------------------|
| TC0800000701.mm.1 | -1,02 | 1700125H03Rik  | JUC0800002507.mm.1 | -2,54 | 0,008166 | 0,405603 |                          |
| TC0600001075.mm.1 | -1,09 |                | JUC0600004241.mm.1 | -2,54 | 0,004596 | 0,369794 |                          |
| TC0700001803.mm.1 | 1,05  |                | JUC0700008065.mm.1 | -2,54 | 0,016083 | 0,457504 |                          |
| TC0900002186.mm.1 | -1,04 | Ube4a          | JUC0900010290.mm.1 | -2,54 | 0,02186  | 0,484635 |                          |
| TC0600003412.mm.1 | 3,04  | Bcat1          | PSR0600026862.mm.1 | -2,55 | 0,002205 | 0,345178 | Cassette Exon 0,17       |
| TC0600003412.mm.1 | 3,04  | Bcat1          | PSR0600026874.mm.1 | -2,99 | 0,013856 | 0,445409 | Cassette Exon 0,06       |
| TC0600003412.mm.1 | 3,04  | Bcat1          | PSR0600026864.mm.1 | -3,05 | 0,008384 | 0,4065   | Cassette Exon 0,28       |
| TC0600003412.mm.1 | 3,04  | Bcat1          | PSR0600026875.mm.1 | -3,13 | 0,007349 | 0,399281 | Cassette Exon 0,28       |
| TC0600003412.mm.1 | 3,04  | Bcat1          | PSR0600026879.mm.1 | -3,3  | 0,015755 | 0,455437 | Alternative 5' Donc 0,31 |
| TC0600003412.mm.1 | 3,04  | Bcat1          | PSR0600026881.mm.1 | -3,3  | 0,008508 | 0,407341 | Cassette Exon 0,25       |
| TC0600003412.mm.1 | 3,04  | Bcat1          | PSR0600026872.mm.1 | -3,36 | 0,013069 | 0,4396   | Cassette Exon 0,25       |
| TC0600003412.mm.1 | 3,04  | Bcat1          | JUC0600014095.mm.1 | -3,6  | 0,010155 | 0,419579 |                          |
| TC0600003412.mm.1 | 3,04  | Bcat1          | PSR0600026876.mm.1 | -3,82 | 0,013201 | 0,440783 | Cassette Exon 0,28       |
| TC0600003412.mm.1 | 3,04  | Bcat1          | PSR0600026858.mm.1 | -3,83 | 0,000748 | 0,308185 | Alternative 3' Acce 0,42 |
| TC0600003412.mm.1 | 3,04  | Bcat1          | PSR0600026880.mm.1 | -3,92 | 0,010404 | 0,42148  | Cassette Exon 0,27       |
| TC0600003412.mm.1 | 3,04  | Bcat1          | JUC0600014096.mm.1 | -4,01 | 0,006202 | 0,387873 |                          |
| TC0600003412.mm.1 | 3,04  | Bcat1          | JUC0600014093.mm.1 | -4,65 | 0,00262  | 0,349612 |                          |
| TC0600003412.mm.1 | 3,04  | Bcat1          | PSR0600026882.mm.1 | -5,05 | 0,000652 | 0,304044 | Cassette Exon 0,25       |
| TC1900000520.mm.1 | 1,3   | Hectd2         | PSR1900004616.mm.1 | -2,55 | 0,034622 | 0,52602  | Alternative 5' Donc 0,23 |
| TC1900000520.mm.1 | 1,3   | Hectd2         | JUC1900002408.mm.1 | -2,65 | 0,048624 | 0,561193 |                          |
| TC0500003724.mm.1 | 1,26  | Gtf3c2         | PSR0500019855.mm.1 | -2,55 | 0,037219 | 0,533311 | Alternative 3' Acce 0,18 |
| TC0500003724.mm.1 | 1,26  | Gtf3c2         | JUC0500010842.mm.1 | -4,13 | 0,01952  | 0,474538 |                          |
| TC1400002454.mm.1 | -1,09 | Lacc1          | JUC1400010451.mm.1 | -2,55 | 0,017484 | 0,463964 |                          |
| TC1800000209.mm.1 | -1,01 | AW554918       | JUC1800000895.mm.1 | -2,55 | 0,028777 | 0,508148 |                          |
| TC1700000715.mm.1 | 1,11  | Gnl1           | JUC1700004021.mm.1 | -2,55 | 0,034157 | 0,524923 |                          |
| TC0500002508.mm.1 | 1,22  | Apbb2          | JUC0500012186.mm.1 | -2,55 | 0,042579 | 0,548047 |                          |
| TC0500003268.mm.1 | -1,19 | Ncor2          | JUC0500016071.mm.1 | -2,55 | 0,034744 | 0,526574 |                          |
| TC0400000833.mm.1 | 1,06  | Gm11184        | JUC0400002875.mm.1 | -2,55 | 0,004845 | 0,37168  |                          |
| TC0300002324.mm.1 | 2,55  | Syt11          | PSR0300017682.mm.1 | -2,56 | 0,032136 | 0,518586 | Alternative 5' Donc 0,15 |
| TC0300002324.mm.1 | 2,55  | Syt11          | PSR0300017685.mm.1 | -2,59 | 0,016928 | 0,460892 | Cassette Exon 0,28       |
| TC0300002324.mm.1 | 2,55  | Syt11          | JUC0300009272.mm.1 | -4,38 | 0,010553 | 0,422341 |                          |
| TC0200002811.mm.1 | 1,37  | Arfgap1        | JUC0200011688.mm.1 | -2,56 | 0,026548 | 0,501435 |                          |
| TC1300002063.mm.1 | 1,19  | Ddx41          | JUC1300006734.mm.1 | -2,56 | 0,01848  | 0,468729 |                          |
| TC0200004830.mm.1 | -1,3  |                | JUC0200021286.mm.1 | -2,56 | 0,02811  | 0,506167 |                          |
| TC1700001549.mm.1 | -1,17 |                | JUC1700007441.mm.1 | -2,56 | 0,003138 | 0,353892 |                          |
| TC1700000387.mm.1 | -1,14 | Metrn          | JUC1700001782.mm.1 | -2,56 | 0,036999 | 0,532502 |                          |
| TC0100003335.mm.1 | 1,03  |                | JUC0100015621.mm.1 | -2,56 | 0,010988 | 0,425397 |                          |
| TC0800001573.mm.1 | -1    | Slc35f3        | JUC0800007047.mm.1 | -2,56 | 0,000219 | 0,28803  |                          |
| TC0700001555.mm.1 | 1,08  | Timm10b; Dnhd1 | JUC0700006688.mm.1 | -2,56 | 0,017374 | 0,463612 |                          |
| TC1000002387.mm.1 | -1,07 |                | JUC1000009324.mm.1 | -2,56 | 0,009666 | 0,41754  |                          |
| TC0300002541.mm.1 | 1,15  | Chd1l          | JUC0300010276.mm.1 | -2,56 | 0,030754 | 0,514087 |                          |
| TC0X00002440.mm.1 | -1,09 | Renbp          | JUC0X00007807.mm.1 | -2,56 | 0,025397 | 0,497403 |                          |
| TC1900001316.mm.1 | 1,49  | Rfx3           | PSR1900011758.mm.1 | -2,57 | 0,044103 | 0,550916 | Cassette Exon 0,16       |
| TC1900001316.mm.1 | 1,49  | Rfx3           | PSR1900011737.mm.1 | -2,59 | 0,005608 | 0,381115 | Intron Retention 0,39    |
| TC1900001316.mm.1 | 1,49  | Rfx3           | JUC1900006446.mm.1 | -2,89 | 0,011913 | 0,431645 |                          |
| TC0100003203.mm.1 | 1,49  | Trove2         | PSR0100026012.mm.1 | -2,57 | 0,01381  | 0,445064 | Intron Retention 0,38    |
| TC0100003203.mm.1 | 1,49  | Trove2         | JUC0100014813.mm.1 | -3,88 | 0,011259 | 0,426757 |                          |
| TC0300000096.mm.1 | 8,02  | Car2           | JUC0300000183.mm.1 | -2,57 | 0,001169 | 0,318556 |                          |

|                   |                              |                    |       |          |          |                     |      |
|-------------------|------------------------------|--------------------|-------|----------|----------|---------------------|------|
| TC0300000096.mm.1 | 8,02 Car2                    | PSR0300000428.mm.1 | -3,02 | 0,006939 | 0,395353 | Cassette Exon       | 0,22 |
| TC0300000096.mm.1 | 8,02 Car2                    | PSR0300000429.mm.1 | -3,76 | 0,000389 | 0,296342 | Cassette Exon       | 0,26 |
| TC0300002755.mm.1 | -1,23 Fndc7                  | PSR0300021700.mm.1 | -2,57 | 0,032448 | 0,519587 | Alternative 3' Acce | 0,25 |
| TC0400002187.mm.1 | -1,09 Gm11816                | PSR0400018214.mm.1 | -2,57 | 0,006999 | 0,395737 | Alternative 5' Donc | 0,23 |
| TC0300003100.mm.1 | 2,11 Spata1                  | JUC0300012788.mm.1 | -2,57 | 0,016845 | 0,460785 |                     |      |
| TC0300003100.mm.1 | 2,11 Spata1                  | PSR0300024377.mm.1 | -2,62 | 0,007072 | 0,39672  | Cassette Exon       | 0,15 |
| TC0300003100.mm.1 | 2,11 Spata1                  | PSR0300024388.mm.1 | -2,8  | 0,023937 | 0,492536 | Cassette Exon       | 0,19 |
| TC0300003100.mm.1 | 2,11 Spata1                  | JUC0300012787.mm.1 | -3,44 | 0,001265 | 0,322251 |                     |      |
| TC0200004348.mm.1 | -1,01 Nutm1                  | JUC0200018520.mm.1 | -2,57 | 0,007322 | 0,39896  |                     |      |
| TC0100002078.mm.1 | 1                            | JUC0100009638.mm.1 | -2,57 | 0,016905 | 0,460797 |                     |      |
| TC1700001394.mm.1 | -1,17 Rsph3b; Rsph3a         | JUC1700006855.mm.1 | -2,57 | 0,035373 | 0,528536 |                     |      |
| TC1900000154.mm.1 | 1,85 Stx5a; Mir6992; mmu-mir | JUC1900001021.mm.1 | -2,57 | 0,008973 | 0,411821 |                     |      |
| TC0500001102.mm.1 | 1,67 Gm10419                 | JUC0500005096.mm.1 | -2,57 | 0,018755 | 0,470733 |                     |      |
| TC0700000072.mm.1 | -1,03 Galp                   | JUC0700000381.mm.1 | -2,57 | 0,023588 | 0,490995 |                     |      |
| TC0600002880.mm.1 | 1,07 Sumf1                   | JUC0600011502.mm.1 | -2,57 | 0,046237 | 0,55611  |                     |      |
| TC0600003125.mm.1 | -1,14 Lag3                   | JUC0600012691.mm.1 | -2,57 | 0,027426 | 0,503961 |                     |      |
| TC0700002882.mm.1 | -1,28 Gm4454; Gm21115; Gm21  | JUC0700013753.mm.1 | -2,57 | 0,01118  | 0,426414 |                     |      |
| TC0900002121.mm.1 | 1,09 Grik4; Gm24420          | JUC0900009915.mm.1 | -2,57 | 0,001875 | 0,338405 |                     |      |
| TC1000001014.mm.1 | 1,17                         | JUC1000004076.mm.1 | -2,57 | 0,023304 | 0,49004  |                     |      |
| TC0800003155.mm.1 | 1,15 4732419C18Rik           | JUC0800013218.mm.1 | -2,57 | 0,002976 | 0,352501 |                     |      |
| TC0800003155.mm.1 | 1,15 4732419C18Rik           | JUC0800013217.mm.1 | -2,74 | 0,016805 | 0,460623 |                     |      |
| TC0300000916.mm.1 | 2,87 Anp32e                  | PSR0300007312.mm.1 | -2,58 | 0,032465 | 0,519612 | Alternative 5' Donc | 0,29 |
| TC0300000916.mm.1 | 2,87 Anp32e                  | JUC0300003793.mm.1 | -2,87 | 0,017465 | 0,463886 |                     |      |
| TC0300000916.mm.1 | 2,87 Anp32e                  | PSR0300007304.mm.1 | -3,32 | 0,046962 | 0,557563 | Alternative 3' Acce | 0,33 |
| TC0300000916.mm.1 | 2,87 Anp32e                  | JUC0300003791.mm.1 | -3,56 | 0,041624 | 0,545159 |                     |      |
| TC0800002582.mm.1 | 1,01                         | PSR0800019706.mm.1 | -2,58 | 0,015829 | 0,456076 | Cassette Exon       | 0,19 |
| TC1300002006.mm.1 | 3,56 Diras2                  | PSR1300012507.mm.1 | -2,58 | 0,0066   | 0,39213  | Cassette Exon       | 0,17 |
| TC1300002006.mm.1 | 3,56 Diras2                  | PSR1300012508.mm.1 | -3,17 | 0,009739 | 0,417839 | Cassette Exon       | 0,17 |
| TC0100000922.mm.1 | 1,14 Capn10                  | PSR0100007764.mm.1 | -2,58 | 0,01125  | 0,426718 |                     |      |
| TC0500000809.mm.1 | -1,29 Prol1                  | JUC0500003886.mm.1 | -2,58 | 0,032991 | 0,521365 |                     |      |
| TC0600002195.mm.1 | -1,56 Gm3120                 | JUC0600009072.mm.1 | -2,58 | 0,015946 | 0,456831 |                     |      |
| TC1000002258.mm.1 | 1,16 Supv3l1                 | JUC1000008826.mm.1 | -2,58 | 0,032024 | 0,51843  |                     |      |
| TC0X00001090.mm.1 | 1,08 Tbx22                   | JUC0X00003541.mm.1 | -2,58 | 0,019577 | 0,474672 |                     |      |
| TC1000000733.mm.1 | 1,41 Zfp280b                 | JUC1000002859.mm.1 | -2,58 | 0,042927 | 0,548271 |                     |      |
| TC0800000679.mm.1 | 2,89 March1                  | PSR0800004579.mm.1 | -2,59 | 0,006253 | 0,388622 | Cassette Exon       | 0,27 |
| TC0800000679.mm.1 | 2,89 March1                  | JUC0800002465.mm.1 | -3,16 | 0,004357 | 0,365487 |                     |      |
| TC0800000679.mm.1 | 2,89 March1                  | PSR0800004572.mm.1 | -3,44 | 0,035515 | 0,528764 | Cassette Exon       | 0,21 |
| TC0800000679.mm.1 | 2,89 March1                  | JUC0800002457.mm.1 | -3,48 | 0,001401 | 0,325997 |                     |      |
| TC0800000679.mm.1 | 2,89 March1                  | PSR0800004570.mm.1 | -3,71 | 0,016326 | 0,458616 | Cassette Exon       | 0,39 |
| TC0800000679.mm.1 | 2,89 March1                  | PSR0800004567.mm.1 | -3,77 | 0,010357 | 0,421055 | Cassette Exon       | 0,39 |
| TC0800000679.mm.1 | 2,89 March1                  | PSR0800004566.mm.1 | -4,36 | 0,005113 | 0,376246 | Alternative 3' Acce | 0,04 |
| TC0800000679.mm.1 | 2,89 March1                  | PSR0800004562.mm.1 | -4,63 | 0,013267 | 0,441583 | Alternative 3' Acce | 0,04 |
| TC0800000679.mm.1 | 2,89 March1                  | PSR0800004569.mm.1 | -5,53 | 0,002045 | 0,341377 | Cassette Exon       | 0,07 |
| TC0800000679.mm.1 | 2,89 March1                  | JUC0800002453.mm.1 | -9,71 | 0,006564 | 0,39213  |                     |      |
| TC1900001276.mm.1 | -1,22 Fxn                    | PSR1900011532.mm.1 | -2,59 | 0,006817 | 0,39387  | Alternative 3' Acce | 0,25 |
| TC1700001672.mm.1 | 1,94 Haghl                   | PSR1700015308.mm.1 | -2,59 | 0,037852 | 0,534803 | Alternative 5' Donc | 0,18 |
| TC0700001417.mm.1 | 1,59 Fam168a                 | PSR0700012089.mm.1 | -2,59 | 0,01349  | 0,44319  | Cassette Exon       | 0,17 |
| TC0700001417.mm.1 | 1,59 Fam168a                 | JUC0700006268.mm.1 | -2,98 | 0,031322 | 0,516204 |                     |      |

|                   |                               |                    |        |          |                              |      |
|-------------------|-------------------------------|--------------------|--------|----------|------------------------------|------|
| TC0100000446.mm.1 | 1,1                           | PSR0100003646.mm.1 | -2,59  | 0,023302 | 0,49004 Cassette Exon        | 0,15 |
| TC1700000975.mm.1 | 1,13 Kat2b                    | JUC1700004970.mm.1 | -2,59  | 0,000235 | 0,28803                      |      |
| TC1900000114.mm.1 | 1,26 Map4k2                   | JUC1900000747.mm.1 | -2,59  | 0,035394 | 0,528596                     |      |
| TC0200001849.mm.1 | -1,15 Slc28a2                 | JUC0200007198.mm.1 | -2,59  | 0,001017 | 0,316361                     |      |
| TC0100003370.mm.1 | 1,09 Zbtb37                   | JUC0100015745.mm.1 | -2,59  | 0,043581 | 0,550052                     |      |
| TC0800001497.mm.1 | 1,14 Acsf3                    | JUC0800006650.mm.1 | -2,59  | 0,048682 | 0,561341                     |      |
| TC0900000174.mm.1 | -1,23 Fbxl12os; 5730577103Rik | JUC0900000528.mm.1 | -2,59  | 0,046548 | 0,55676                      |      |
| TC0900003052.mm.1 | 1,63 Bsn                      | JUC0900014430.mm.1 | -2,59  | 0,005    | 0,373851                     |      |
| TC0900003052.mm.1 | 1,63 Bsn                      | JUC0900014425.mm.1 | -3,17  | 0,006513 | 0,391376                     |      |
| TC0400004007.mm.1 | 1,18                          | JUC0400017269.mm.1 | -2,59  | 0,044297 | 0,551351                     |      |
| TC0400004007.mm.1 | 1,18                          | JUC0400017270.mm.1 | -2,59  | 0,044297 | 0,551351                     |      |
| TC0200000250.mm.1 | 5,45 Cacnb2                   | PSR0200001128.mm.1 | -2,6   | 0,040491 | 0,542169 Alternative 5' Donc | 0,23 |
| TC0200000250.mm.1 | 5,45 Cacnb2                   | PSR0200001109.mm.1 | -2,95  | 0,006613 | 0,392269 Alternative 5' Donc | 0,27 |
| TC0200000250.mm.1 | 5,45 Cacnb2                   | PSR0200001114.mm.1 | -3,53  | 0,004812 | 0,371408 Cassette Exon       | 0,48 |
| TC0200000250.mm.1 | 5,45 Cacnb2                   | JUC0200000493.mm.1 | -4,11  | 0,022413 | 0,486711                     |      |
| TC0200000250.mm.1 | 5,45 Cacnb2                   | JUC0200000488.mm.1 | -4,48  | 0,006281 | 0,388863                     |      |
| TC0200000250.mm.1 | 5,45 Cacnb2                   | PSR0200001100.mm.1 | -4,64  | 0,007921 | 0,403819 Cassette Exon       | 0,21 |
| TC0200000250.mm.1 | 5,45 Cacnb2                   | PSR0200001097.mm.1 | -4,83  | 0,043085 | 0,548459 Cassette Exon       | 0,28 |
| TC0200000250.mm.1 | 5,45 Cacnb2                   | PSR0200001098.mm.1 | -4,95  | 0,010216 | 0,419955 Cassette Exon       | 0,41 |
| TC0200000250.mm.1 | 5,45 Cacnb2                   | PSR0200001104.mm.1 | -5,09  | 0,005113 | 0,376246 Cassette Exon       | 0,21 |
| TC0200000250.mm.1 | 5,45 Cacnb2                   | PSR0200001102.mm.1 | -5,58  | 0,008581 | 0,40821 Cassette Exon        | 0,41 |
| TC0200000250.mm.1 | 5,45 Cacnb2                   | JUC0200000492.mm.1 | -5,58  | 0,003938 | 0,359818                     |      |
| TC0200000250.mm.1 | 5,45 Cacnb2                   | PSR0200001099.mm.1 | -5,79  | 0,006359 | 0,389469 Cassette Exon       | 0,55 |
| TC0200000250.mm.1 | 5,45 Cacnb2                   | PSR0200001105.mm.1 | -6,01  | 0,01955  | 0,474538 Cassette Exon       | 0,21 |
| TC0200000250.mm.1 | 5,45 Cacnb2                   | PSR0200001103.mm.1 | -6,23  | 0,017247 | 0,462729 Cassette Exon       | 0,07 |
| TC0200000250.mm.1 | 5,45 Cacnb2                   | JUC0200000497.mm.1 | -7,32  | 0,008037 | 0,40434                      |      |
| TC0200000250.mm.1 | 5,45 Cacnb2                   | JUC0200000481.mm.1 | -7,49  | 0,004575 | 0,369794                     |      |
| TC0200000250.mm.1 | 5,45 Cacnb2                   | JUC0200000480.mm.1 | -9,1   | 0,020297 | 0,477245                     |      |
| TC0200000250.mm.1 | 5,45 Cacnb2                   | JUC0200000476.mm.1 | -9,41  | 0,003212 | 0,354243                     |      |
| TC0200000250.mm.1 | 5,45 Cacnb2                   | JUC0200000490.mm.1 | -10,13 | 0,00057  | 0,304044                     |      |
| TC1200000074.mm.1 | 1,49 Wdr35                    | JUC1200000444.mm.1 | -2,6   | 0,028956 | 0,508766                     |      |
| TC1200000074.mm.1 | 1,49 Wdr35                    | JUC1200000426.mm.1 | -2,94  | 0,032327 | 0,519155                     |      |
| TC1300002214.mm.1 | -1,02                         | JUC1300007475.mm.1 | -2,6   | 0,00813  | 0,405267                     |      |
| TC0100003243.mm.1 | -1,21                         | JUC0100015033.mm.1 | -2,6   | 0,000398 | 0,29748                      |      |
| TC1600001962.mm.1 | -1,28                         | JUC1600007840.mm.1 | -2,6   | 0,006155 | 0,387873                     |      |
| TC0800000736.mm.1 | 1,51 Hapln4                   | JUC0800002678.mm.1 | -2,6   | 0,033699 | 0,523549                     |      |
| TC0500001049.mm.1 | -1,29 Zfp326                  | JUC0500004855.mm.1 | -2,6   | 0,005597 | 0,381115                     |      |
| TC0600000663.mm.1 | 1,19 Fam188b                  | JUC0600002566.mm.1 | -2,6   | 0,017697 | 0,465114                     |      |
| TC0600000663.mm.1 | 1,19 Fam188b                  | JUC0600002568.mm.1 | -2,83  | 0,042429 | 0,547627                     |      |
| TC1100003077.mm.1 | -1,03                         | JUC1100014838.mm.1 | -2,6   | 0,009498 | 0,416578                     |      |
| TC0400003604.mm.1 | 1,11 Eif3i                    | JUC0400015324.mm.1 | -2,6   | 0,027347 | 0,503766                     |      |
| TC0100000627.mm.1 | 2,22 Pnkd                     | PSR0100005039.mm.1 | -2,61  | 0,048133 | 0,559938 Alternative 5' Donc | 0,25 |
| TC0300001043.mm.1 | -1,93 Ampd1                   | JUC0300004339.mm.1 | -2,61  | 0,013113 | 0,439759                     |      |
| TC0300001278.mm.1 | 1,22                          | JUC0300005442.mm.1 | -2,61  | 0,001527 | 0,330287                     |      |
| TC0100002913.mm.1 | 1,18                          | JUC0100013360.mm.1 | -2,61  | 0,002339 | 0,347265                     |      |
| TC0900000982.mm.1 | 1,38 Pygo1                    | JUC0900004119.mm.1 | -2,61  | 0,027243 | 0,503642                     |      |
| TC0900001692.mm.1 | -1,15 Aasdhppt                | JUC0900008033.mm.1 | -2,61  | 0,026544 | 0,501435                     |      |
| TC1100001214.mm.1 | -1,12 Gm11418                 | JUC1100005994.mm.1 | -2,61  | 0,044554 | 0,551921                     |      |

|                   |                              |                    |        |          |                              |      |
|-------------------|------------------------------|--------------------|--------|----------|------------------------------|------|
| TC0300002671.mm.1 | 1,03                         | JUC0300010820.mm.1 | -2,61  | 0,020894 | 0,479697                     |      |
| TC0900003316.mm.1 | 1,04                         | JUC0900015733.mm.1 | -2,61  | 0,009619 | 0,417315                     |      |
| TC0400001527.mm.1 | 1,24 Tmem234                 | JUC0400006147.mm.1 | -2,61  | 0,01238  | 0,434939                     |      |
| TC0400001527.mm.1 | 1,24 Tmem234                 | JUC0400006166.mm.1 | -3,9   | 0,043048 | 0,54841                      |      |
| TC0700004652.mm.1 | 3,59 Snrpn; Snurf            | JUC0700015174.mm.1 | -2,62  | 0,040178 | 0,541655                     |      |
| TC0700004652.mm.1 | 3,59 Snrpn; Snurf            | PSR0700028716.mm.1 | -2,93  | 0,029467 | 0,510123 Cassette Exon       | 0,28 |
| TC0700004652.mm.1 | 3,59 Snrpn; Snurf            | JUC0700015184.mm.1 | -3,29  | 0,039542 | 0,539764                     |      |
| TC0700004652.mm.1 | 3,59 Snrpn; Snurf            | JUC0700015172.mm.1 | -3,48  | 0,01226  | 0,433888                     |      |
| TC0700004652.mm.1 | 3,59 Snrpn; Snurf            | PSR0700028717.mm.1 | -3,78  | 0,012455 | 0,43528 Cassette Exon        | 0,36 |
| TC0700004652.mm.1 | 3,59 Snrpn; Snurf            | PSR0700028715.mm.1 | -4,06  | 0,010116 | 0,41912 Cassette Exon        | 0,28 |
| TC0300000112.mm.1 | 14,82 2610100L16Rik          | JUC0300000211.mm.1 | -2,62  | 0,014907 | 0,451803                     |      |
| TC0300000112.mm.1 | 14,82 2610100L16Rik          | PSR0300000485.mm.1 | -3,19  | 0,000432 | 0,297771 Cassette Exon       | 0,34 |
| TC0300000112.mm.1 | 14,82 2610100L16Rik          | JUC0300000210.mm.1 | -6,88  | 0,006593 | 0,39213                      |      |
| TC0300000112.mm.1 | 14,82 2610100L16Rik          | JUC0300000212.mm.1 | -17,01 | 0,004617 | 0,369794                     |      |
| TC0300000112.mm.1 | 14,82 2610100L16Rik          | PSR0300000482.mm.1 | -24,23 | 0,003676 | 0,357266 Alternative 3' Acce | 0,35 |
| TC0200002863.mm.1 | 1,58 Prpf18                  | PSR0200023736.mm.1 | -2,62  | 0,011314 | 0,427133 Alternative 3' Acce | 0,19 |
| TC0100001257.mm.1 | -1,33 Tnnt2                  | PSR0100010377.mm.1 | -2,62  | 0,004456 | 0,367394 Cassette Exon       | 0,17 |
| TC0X00000729.mm.1 | 1,03 Gm6897                  | PSR0X00005041.mm.1 | -2,62  | 0,000476 | 0,298999 Cassette Exon       | 0,15 |
| TC1200001366.mm.1 | 1,26 Fkbp1b                  | PSR1200009792.mm.1 | -2,62  | 0,016768 | 0,460504                     |      |
| TC1800001409.mm.1 | 1,09 Tcof1                   | JUC1800005713.mm.1 | -2,62  | 0,038121 | 0,535709                     |      |
| TC1900000142.mm.1 | -1,22 Hrasls5                | JUC1900000947.mm.1 | -2,62  | 0,036894 | 0,532257                     |      |
| TC0200001724.mm.1 | 1,3 Fam98b                   | JUC0200006327.mm.1 | -2,62  | 0,04828  | 0,56031                      |      |
| TC1700000473.mm.1 | 1,01 Def6                    | JUC1700002220.mm.1 | -2,62  | 0,02901  | 0,508842                     |      |
| TC0500003645.mm.1 | 1,55 Katnal1; 5930430L01Rik  | PSR0500033438.mm.1 | -2,63  | 0,005322 | 0,378059 Alternative 3' Acce | 0,23 |
| TC0500003645.mm.1 | 1,55 Katnal1; 5930430L01Rik  | JUC0500018198.mm.1 | -3,08  | 0,008907 | 0,410728                     |      |
| TC0200001709.mm.1 | 1,46 G630016G05Rik           | PSR0200012649.mm.1 | -2,63  | 0,00178  | 0,336311 Cassette Exon       | 0,16 |
| TC1400000536.mm.1 | 1,21 Otx2os1; RP23-131O4.2   | JUC1400002548.mm.1 | -2,63  | 0,011217 | 0,426683                     |      |
| TC1900000116.mm.1 | -1,1 Sf1                     | JUC1900000775.mm.1 | -2,63  | 0,025109 | 0,496358                     |      |
| TC1700000423.mm.1 | 1,01 Gm20468                 | JUC1700001951.mm.1 | -2,63  | 0,024515 | 0,493992                     |      |
| TC0400000376.mm.1 | -1,09 Fam219aos; Gm12404; 17 | JUC0400001130.mm.1 | -2,63  | 0,035098 | 0,527591                     |      |
| TC0X00000855.mm.1 | 1 Gm26958; RP23-286G19.6     | JUC0X00002792.mm.1 | -2,63  | 0,004326 | 0,364646                     |      |
| TC1300002418.mm.1 | 8,48 Rasgrf2                 | PSR1300016056.mm.1 | -2,64  | 0,030214 | 0,512452 Cassette Exon       | 0,16 |
| TC1300002418.mm.1 | 8,48 Rasgrf2                 | JUC1300008445.mm.1 | -3,21  | 0,016261 | 0,458329                     |      |
| TC1300002418.mm.1 | 8,48 Rasgrf2                 | PSR1300016054.mm.1 | -3,28  | 0,025205 | 0,49668 Cassette Exon        | 0,26 |
| TC1300002418.mm.1 | 8,48 Rasgrf2                 | PSR1300016045.mm.1 | -3,7   | 0,045308 | 0,553742 Cassette Exon       | 0,25 |
| TC1300002418.mm.1 | 8,48 Rasgrf2                 | JUC1300008451.mm.1 | -3,72  | 0,011181 | 0,426414                     |      |
| TC1300002418.mm.1 | 8,48 Rasgrf2                 | PSR1300016074.mm.1 | -4,25  | 0,043624 | 0,550161 Cassette Exon       | 0,41 |
| TC1300002418.mm.1 | 8,48 Rasgrf2                 | PSR1300016057.mm.1 | -4,92  | 0,011346 | 0,427374 Cassette Exon       | 0,43 |
| TC1300002418.mm.1 | 8,48 Rasgrf2                 | PSR1300016085.mm.1 | -6,23  | 0,019793 | 0,475212 Cassette Exon       | 0,32 |
| TC1300002418.mm.1 | 8,48 Rasgrf2                 | JUC1300008442.mm.1 | -6,81  | 0,005318 | 0,378059                     |      |
| TC1300002418.mm.1 | 8,48 Rasgrf2                 | JUC1300008463.mm.1 | -9,18  | 0,012441 | 0,43528                      |      |
| TC1300002418.mm.1 | 8,48 Rasgrf2                 | JUC1300008450.mm.1 | -10,76 | 0,040204 | 0,541714                     |      |
| TC1300002418.mm.1 | 8,48 Rasgrf2                 | JUC1300008472.mm.1 | -13,69 | 0,00304  | 0,353826                     |      |
| TC1300002418.mm.1 | 8,48 Rasgrf2                 | JUC1300008461.mm.1 | -13,74 | 0,029378 | 0,509995                     |      |
| TC1700000562.mm.1 | -1,5 Cyp4f39                 | PSR1700005087.mm.1 | -2,64  | 0,025579 | 0,497808 Alternative 5' Donc | 0,26 |
| TC1200002389.mm.1 | 1,97 Hsp90aa1                | PSR1200016571.mm.1 | -2,64  | 0,033564 | 0,523131                     |      |
| TC1200002389.mm.1 | 1,97 Hsp90aa1                | PSR1200016570.mm.1 | -2,68  | 0,02758  | 0,504482                     |      |
| TC1200002389.mm.1 | 1,97 Hsp90aa1                | PSR1200016578.mm.1 | -2,87  | 0,042319 | 0,547263 Cassette Exon       | 0,2  |

|                   |       |                       |                    |       |          |          |                     |      |
|-------------------|-------|-----------------------|--------------------|-------|----------|----------|---------------------|------|
| TC0700004318.mm.1 | -1,18 | sept-01               | PSR0700036253.mm.1 | -2,64 | 0,021015 | 0,480143 | Alternative 3' Acce | 0,16 |
| TC1200001408.mm.1 | 1,13  | 1700022H16Rik         | JUC1200005509.mm.1 | -2,64 | 0,000576 | 0,304044 |                     |      |
| TC1900000878.mm.1 | 1,08  | Ighmbp2               | JUC1900004140.mm.1 | -2,64 | 0,017575 | 0,464258 |                     |      |
| TC1500001657.mm.1 | 1,75  | NdrG1                 | JUC1500007041.mm.1 | -2,64 | 0,030387 | 0,512923 |                     |      |
| TC1500001657.mm.1 | 1,75  | NdrG1                 | JUC1500007036.mm.1 | -2,92 | 0,000023 | 0,22008  |                     |      |
| TC1500001657.mm.1 | 1,75  | NdrG1                 | JUC1500007044.mm.1 | -3,73 | 0,005475 | 0,379939 |                     |      |
| TC0200001514.mm.1 | -1,42 | Traf6                 | JUC0200005685.mm.1 | -2,64 | 0,028844 | 0,508446 |                     |      |
| TC1500002042.mm.1 | 2,26  | Dennd6b               | JUC1500009293.mm.1 | -2,64 | 0,014898 | 0,451802 |                     |      |
| TC1500002042.mm.1 | 2,26  | Dennd6b               | JUC1500009301.mm.1 | -3,13 | 0,019293 | 0,473074 |                     |      |
| TC1500002042.mm.1 | 2,26  | Dennd6b               | JUC1500009296.mm.1 | -6,77 | 0,008428 | 0,406611 |                     |      |
| TC1500000103.mm.1 | -1,01 | Mtmr12                | JUC1500000585.mm.1 | -2,64 | 0,018739 | 0,470733 |                     |      |
| TC0100003595.mm.1 | -1,52 | Gm16340               | JUC0100016783.mm.1 | -2,64 | 0,036631 | 0,53158  |                     |      |
| TC1700000611.mm.1 | 1,07  | Rxb                   | JUC1700003127.mm.1 | -2,64 | 0,024347 | 0,49362  |                     |      |
| TC0700000214.mm.1 | 1,42  | Crxos; Crxos1         | JUC0700000727.mm.1 | -2,64 | 0,00384  | 0,358714 |                     |      |
| TC0700000214.mm.1 | 1,42  | Crxos; Crxos1         | JUC0700000724.mm.1 | -2,75 | 0,00984  | 0,417839 |                     |      |
| TC1000001554.mm.1 | -1,19 | Tmem194; 1700012D01Ri | JUC1000005918.mm.1 | -2,64 | 0,013138 | 0,440196 |                     |      |
| TC1000002262.mm.1 | 1,09  | 2510003E04Rik         | PSR1000016155.mm.1 | -2,65 | 0,0034   | 0,354874 | Alternative 3' Acce | 0,27 |
| TC1500000595.mm.1 | 2,47  |                       | PSR1500004269.mm.1 | -2,65 | 0,001336 | 0,325349 | Alternative 3' Acce | 0,26 |
| TC1500001965.mm.1 | 1,34  | Rrp7a                 | PSR1500015464.mm.1 | -2,65 | 0,003371 | 0,354303 | Alternative 5' Donc | 0,25 |
| TC1500001965.mm.1 | 1,34  | Rrp7a                 | JUC1500008763.mm.1 | -2,71 | 0,009665 | 0,41754  |                     |      |
| TC0X00003067.mm.1 | 1,48  | Rbm41                 | PSR0X00019258.mm.1 | -2,65 | 0,024511 | 0,493992 | Alternative 3' Acce | 0,22 |
| TC0700004241.mm.1 | 1,85  | Zkscan2               | PSR0700035309.mm.1 | -2,65 | 0,007027 | 0,395972 | Cassette Exon       | 0,18 |
| TC0300001061.mm.1 | 1,27  | Ap4b1                 | JUC0300004444.mm.1 | -2,65 | 0,019455 | 0,474165 |                     |      |
| TC1500000488.mm.1 | -1,06 | Tg                    | JUC1500002023.mm.1 | -2,65 | 0,008179 | 0,40568  |                     |      |
| TC0500000940.mm.1 | -1,03 | 4930467D21Rik         | JUC0500004461.mm.1 | -2,65 | 0,036984 | 0,532502 |                     |      |
| TC1100000585.mm.1 | 1,53  | Cdkl3                 | JUC1100002362.mm.1 | -2,65 | 0,029026 | 0,508859 |                     |      |
| TC1100000585.mm.1 | 1,53  | Cdkl3                 | JUC1100002372.mm.1 | -4,44 | 0,009097 | 0,412827 |                     |      |
| TC0900003114.mm.1 | -1,12 | Nradd                 | PSR0900026308.mm.1 | -2,65 | 0,044011 | 0,550779 |                     |      |
| TC0900002332.mm.1 | -1,03 | Nrg4                  | JUC0900011048.mm.1 | -2,65 | 0,003823 | 0,358315 |                     |      |
| TC1000000231.mm.1 | 1,08  | Samd3                 | JUC1000000895.mm.1 | -2,65 | 0,003866 | 0,358861 |                     |      |
| TC0900003040.mm.1 | 2,85  | Slc38a3               | PSR0900025416.mm.1 | -2,66 | 0,029033 | 0,508904 | Alternative 3' Acce | 0,25 |
| TC0900003040.mm.1 | 2,85  | Slc38a3               | PSR0900025398.mm.1 | -3,45 | 0,022842 | 0,488353 | Alternative 3' Acce | 0,39 |
| TC0900003040.mm.1 | 2,85  | Slc38a3               | PSR0900025420.mm.1 | -5,48 | 0,006729 | 0,393343 | Cassette Exon       | 0,28 |
| TC0900003040.mm.1 | 2,85  | Slc38a3               | PSR0900025421.mm.1 | -5,86 | 0,004361 | 0,365487 | Cassette Exon       | 0,28 |
| TC0700002744.mm.1 | 1,57  | Zfp146                | PSR0700024315.mm.1 | -2,66 | 0,006962 | 0,395722 | Cassette Exon       | 0,18 |
| TC1000002684.mm.1 | 1,17  | Gm20757               | PSR1000020523.mm.1 | -2,66 | 0,004889 | 0,372195 | Cassette Exon       | 0,16 |
| TC0200003866.mm.1 | -1,19 | Tfpi                  | PSR0200033381.mm.1 | -2,66 | 0,010279 | 0,420305 | Alternative 5' Donc | 0,12 |
| TC1400002862.mm.1 | 1,3   | Gm10377; Gm10376      | JUC1400007580.mm.1 | -2,66 | 0,010353 | 0,421002 |                     |      |
| TC0200003134.mm.1 | -1,2  | 4933433C11Rik         | JUC0200013027.mm.1 | -2,66 | 0,007623 | 0,401947 |                     |      |
| TC1600002059.mm.1 | 1,26  | 1110004E09Rik         | JUC1600008135.mm.1 | -2,66 | 0,007494 | 0,400809 |                     |      |
| TC0700004526.mm.1 | -1,15 | Lmndt2                | JUC0700020036.mm.1 | -2,66 | 0,022058 | 0,485327 |                     |      |
| TC0500002297.mm.1 | -1,19 | Hs3st1                | JUC0500011537.mm.1 | -2,66 | 0,010965 | 0,425117 |                     |      |
| TC0500003685.mm.1 | 1,12  | N4bp2l1               | JUC0500018283.mm.1 | -2,66 | 0,021237 | 0,481319 |                     |      |
| TC1000002191.mm.1 | -1,21 |                       | JUC1000008369.mm.1 | -2,66 | 0,027969 | 0,505748 |                     |      |
| TC1100003295.mm.1 | -1,36 | Foxn1                 | JUC1100015892.mm.1 | -2,66 | 0,014705 | 0,45037  |                     |      |
| TC0600001212.mm.1 | 1,99  | Grm7                  | PSR0600009350.mm.1 | -2,67 | 0,028087 | 0,506064 | Cassette Exon       | 0,19 |
| TC0600001212.mm.1 | 1,99  | Grm7                  | PSR0600009347.mm.1 | -2,97 | 0,009898 | 0,418332 | Cassette Exon       | 0,09 |
| TC0600001212.mm.1 | 1,99  | Grm7                  | JUC0600004827.mm.1 | -4,12 | 0,038998 | 0,537976 |                     |      |

|                       |                    |                      |       |          |                              |      |
|-----------------------|--------------------|----------------------|-------|----------|------------------------------|------|
| TC1200001908.mm.1     | 2,17 Dhrs7         | PSR1200013093.mm.1   | -2,67 | 0,001702 | 0,335511 Cassette Exon       | 0,18 |
| TC0200005143.mm.1     | 1,03 Cdh22         | JUC0200022629.mm.1   | -2,67 | 0,010439 | 0,421595                     |      |
| TC1700000600.mm.1     | 1,03 Daxx          | JUC1700003038.mm.1   | -2,67 | 0,0069   | 0,394768                     |      |
| TC0200000649.mm.1     | 1,07 Gm13429       | JUC0200003056.mm.1   | -2,67 | 0,005073 | 0,37524                      |      |
| TC0X00002464.mm.1     | -1,19 Xlr5e-ps     | JUC0X00007999.mm.1   | -2,67 | 0,013544 | 0,44358                      |      |
| TC0600000964.mm.1     | 1,38 Alms1         | JUC0600003806.mm.1   | -2,68 | 0,025636 | 0,497989                     |      |
| TC0600000964.mm.1     | 1,38 Alms1         | PSR0600007466.mm.1   | -2,79 | 0,026606 | 0,501778 Alternative 3' Acce | 0,26 |
| TC0600000964.mm.1     | 1,38 Alms1         | PSR0600007463.mm.1   | -4,42 | 0,029425 | 0,509995 Alternative 5' Donc | 0,49 |
| TC0300003247.mm.1     | 4,11 Amy1          | PSR0300021944.mm.1   | -2,68 | 0,003973 | 0,360082 Cassette Exon       | 0,19 |
| TC0300003247.mm.1     | 4,11 Amy1          | JUC0300011442.mm.1   | -2,88 | 0,00532  | 0,378059                     |      |
| TC0300003247.mm.1     | 4,11 Amy1          | PSR0300021946.mm.1   | -3,52 | 0,001968 | 0,340561 Cassette Exon       | 0,19 |
| TC0300003247.mm.1     | 4,11 Amy1          | PSR0300021943.mm.1   | -4,01 | 0,036732 | 0,531784 Cassette Exon       | 0,28 |
| TCX_GL456233_random00 | 2,02 Tmlhe         | PSRX_GL456233_random | -2,68 | 0,010286 | 0,420355 Cassette Exon       | 0,24 |
| TCX_GL456233_random00 | 2,02 Tmlhe         | JUCX_GL456233_random | -2,98 | 0,012138 | 0,432868                     |      |
| TC1300001051.mm.1     | -1,23 Dmgdh        | PSR1300006702.mm.1   | -2,68 | 0,002958 | 0,352501 Cassette Exon       | 0,19 |
| TC0X00000698.mm.1     | 1,03 Avpr2         | PSR0X00004603.mm.1   | -2,68 | 0,018442 | 0,468671 Alternative 5' Donc | 0,18 |
| TC1700001112.mm.1     | 1,54 A330050F15Rik | JUC1700005678.mm.1   | -2,68 | 0,04439  | 0,551441                     |      |
| TC1900001765.mm.1     | 1,05 Vps51; Tm7sf2 | JUC1900005021.mm.1   | -2,68 | 0,014354 | 0,448293                     |      |
| TC1900001765.mm.1     | 1,05 Vps51; Tm7sf2 | JUC1900005028.mm.1   | -3,87 | 0,01466  | 0,450098                     |      |
| TC1600001752.mm.1     | -1,3 Tmem45a       | JUC1600007408.mm.1   | -2,68 | 0,017144 | 0,46232                      |      |
| TC0100003316.mm.1     | 1,01 Tdrd5         | JUC0100015469.mm.1   | -2,68 | 0,046832 | 0,557144                     |      |
| TC1100000074.mm.1     | -1,12 Ankrd36      | JUC1100000397.mm.1   | -2,68 | 0,012038 | 0,432286                     |      |
| TC1100000876.mm.1     | -1,16 Ccdc42       | JUC1100003855.mm.1   | -2,68 | 0,000718 | 0,306015                     |      |
| TC0900002776.mm.1     | 1,52 Ube2cbp       | JUC0900012860.mm.1   | -2,68 | 0,003549 | 0,356223                     |      |
| TC0900002776.mm.1     | 1,52 Ube2cbp       | JUC0900012858.mm.1   | -2,72 | 0,007599 | 0,401712                     |      |
| TC0900002776.mm.1     | 1,52 Ube2cbp       | JUC0900012850.mm.1   | -2,8  | 0,016483 | 0,459355                     |      |
| TC0900002776.mm.1     | 1,52 Ube2cbp       | JUC0900012859.mm.1   | -3,05 | 0,005398 | 0,378916                     |      |
| TC0200004897.mm.1     | 3,24 Nrsn2         | PSR0200041603.mm.1   | -2,69 | 0,03941  | 0,539566 Cassette Exon       | 0,29 |
| TC0200004897.mm.1     | 3,24 Nrsn2         | JUC0200021504.mm.1   | -4,23 | 0,016575 | 0,459612                     |      |
| TC1200000629.mm.1     | 3,26 Six6          | PSR1200004361.mm.1   | -2,69 | 0,005281 | 0,378059 Alternative 3' Acce | 0,27 |
| TC1200000629.mm.1     | 3,26 Six6          | JUC1200002449.mm.1   | -3,67 | 0,000088 | 0,255472                     |      |
| TC0300001060.mm.1     | -1,06 Gm15471      | PSR0300008567.mm.1   | -2,69 | 0,004998 | 0,373851                     |      |
| TC1800001083.mm.1     | -1 Slc39a6         | JUC1800004441.mm.1   | -2,69 | 0,015727 | 0,455416                     |      |
| TC1900000168.mm.1     | 1,39 Mta2          | JUC1900001176.mm.1   | -2,69 | 0,028753 | 0,508148                     |      |
| TC1600000033.mm.1     | 1,17 Hmox2         | JUC1600000122.mm.1   | -2,69 | 0,014774 | 0,450801                     |      |
| TC1600000033.mm.1     | 1,17 Hmox2         | PSR1600000271.mm.1   | -3,07 | 0,034617 | 0,52602                      |      |
| TC0100003421.mm.1     | -1,31 Blzf1        | JUC0100016065.mm.1   | -2,69 | 0,03118  | 0,515739                     |      |
| TC0800002579.mm.1     | 1,07 Mri1          | JUC0800010711.mm.1   | -2,69 | 0,002669 | 0,349612                     |      |
| TC0500001073.mm.1     | -1,3 Brdt          | PSR0500009037.mm.1   | -2,7  | 0,008352 | 0,406435 Cassette Exon       | 0,16 |
| TC1700001190.mm.1     | 1,08 Sult6b1       | PSR1700011251.mm.1   | -2,7  | 0,040782 | 0,543175 Cassette Exon       | 0,16 |
| TC1900001504.mm.1     | -1,09 Tll2         | JUC1900007249.mm.1   | -2,7  | 0,046671 | 0,556812                     |      |
| TC1900000937.mm.1     | -1,09 Ccs          | JUC1900004518.mm.1   | -2,7  | 0,007673 | 0,402377                     |      |
| TC0900000614.mm.1     | 1,12               | JUC0900002320.mm.1   | -2,7  | 0,005745 | 0,382993                     |      |
| TC0700000251.mm.1     | -1,16 Ceacam3      | JUC0700000906.mm.1   | -2,7  | 0,004761 | 0,371039                     |      |
| TC0300001834.mm.1     | -1,08 Gm3143       | JUC0300007447.mm.1   | -2,7  | 0,040802 | 0,543194                     |      |
| TC0X00002721.mm.1     | 1,11 Zmym3         | JUC0X00008708.mm.1   | -2,7  | 0,029966 | 0,511499                     |      |
| TC0700002617.mm.1     | 6,13 Atp1a3        | PSR0700022556.mm.1   | -2,71 | 0,009066 | 0,412827 Alternative 3' Acce | 0,19 |
| TC0700002617.mm.1     | 6,13 Atp1a3        | JUC0700011977.mm.1   | -2,75 | 0,028001 | 0,505848                     |      |

|                   |                             |                    |        |          |                              |      |
|-------------------|-----------------------------|--------------------|--------|----------|------------------------------|------|
| TC0700002617.mm.1 | 6,13 Atp1a3                 | PSR0700022584.mm.1 | -3,56  | 0,000369 | 0,291725 Cassette Exon       | 0,26 |
| TC0700002617.mm.1 | 6,13 Atp1a3                 | PSR0700022558.mm.1 | -3,69  | 0,002263 | 0,34578 Intron Retention     | 0,54 |
| TC0700002617.mm.1 | 6,13 Atp1a3                 | PSR0700022588.mm.1 | -7,52  | 0,004633 | 0,36999 Cassette Exon        | 0,26 |
| TC0300001562.mm.1 | 4,06 Negr1                  | JUC0300006684.mm.1 | -2,71  | 0,005403 | 0,378967                     |      |
| TC0300001562.mm.1 | 4,06 Negr1                  | PSR0300012623.mm.1 | -2,95  | 0,03031  | 0,512738 Cassette Exon       | 0,18 |
| TC0300001562.mm.1 | 4,06 Negr1                  | PSR0300012625.mm.1 | -3,69  | 0,042955 | 0,548357 Cassette Exon       | 0,25 |
| TC0300001562.mm.1 | 4,06 Negr1                  | PSR0300012611.mm.1 | -5,27  | 0,008682 | 0,408815 Alternative 3' Acce | 0,37 |
| TC0300001562.mm.1 | 4,06 Negr1                  | PSR0300012610.mm.1 | -7,03  | 0,034587 | 0,52602 Alternative 3' Acce  | 0,37 |
| TC0500002008.mm.1 | 1,41 Rsb1l                  | PSR0500018259.mm.1 | -2,71  | 0,001008 | 0,316361 Alternative 5' Donc | 0,28 |
| TC0Y00000357.mm.1 | 1,1 Gm20881; Ssty2; Gm2079  | PSR0Y00002131.mm.1 | -2,71  | 0,011668 | 0,429939 Alternative 3' Acce | 0,27 |
| TC0Y00000419.mm.1 | 1,1 Gm21617; Ssty2; Gm2079  | PSR0Y00002324.mm.1 | -2,71  | 0,011668 | 0,429939 Alternative 3' Acce | 0,27 |
| TC0900002126.mm.1 | 1,58 Tmem136                | PSR0900017686.mm.1 | -2,71  | 0,032204 | 0,51885 Cassette Exon        | 0,16 |
| TC0600000438.mm.1 | 1,29 Gm5771                 | JUC0600001762.mm.1 | -2,71  | 0,001051 | 0,316361                     |      |
| TC1100000609.mm.1 | 1,75 Kif3a                  | JUC1100002511.mm.1 | -2,71  | 0,002611 | 0,349501                     |      |
| TC0400004177.mm.1 | -1,16 Akap2                 | JUC0400002240.mm.1 | -2,71  | 0,014207 | 0,447756                     |      |
| TC0900002971.mm.1 | 1,25 Bfsp2                  | JUC0900013662.mm.1 | -2,71  | 0,0231   | 0,489699                     |      |
| TC1300001857.mm.1 | 11,14 Mak                   | JUC1300005937.mm.1 | -2,72  | 0,031779 | 0,517596                     |      |
| TC1300001857.mm.1 | 11,14 Mak                   | JUC1300005938.mm.1 | -3,04  | 0,004502 | 0,368473                     |      |
| TC1300001857.mm.1 | 11,14 Mak                   | PSR1300011580.mm.1 | -3,11  | 0,018965 | 0,471398 Cassette Exon       | 0,32 |
| TC1300001857.mm.1 | 11,14 Mak                   | JUC1300005945.mm.1 | -3,64  | 0,032443 | 0,519525                     |      |
| TC1300001857.mm.1 | 11,14 Mak                   | PSR1300011574.mm.1 | -4,02  | 0,016128 | 0,457772 Cassette Exon       | 0,25 |
| TC1300001857.mm.1 | 11,14 Mak                   | JUC1300005947.mm.1 | -6,26  | 0,016479 | 0,459352                     |      |
| TC1300001857.mm.1 | 11,14 Mak                   | JUC1300005934.mm.1 | -9,7   | 0,006098 | 0,386974                     |      |
| TC1300001857.mm.1 | 11,14 Mak                   | PSR1300011590.mm.1 | -12,91 | 0,008802 | 0,409933 Cassette Exon       | 0,41 |
| TC1300001857.mm.1 | 11,14 Mak                   | JUC1300005949.mm.1 | -15,91 | 0,003844 | 0,358723                     |      |
| TC1400001115.mm.1 | 2,84 Pcdh17                 | PSR1400008917.mm.1 | -2,72  | 0,010447 | 0,421652 Cassette Exon       | 0,19 |
| TC1400001115.mm.1 | 2,84 Pcdh17                 | PSR1400008936.mm.1 | -2,86  | 0,030187 | 0,512365 Alternative 5' Donc | 0,3  |
| TC1400001115.mm.1 | 2,84 Pcdh17                 | PSR1400008920.mm.1 | -4,37  | 0,004927 | 0,373093 Cassette Exon       | 0,39 |
| TC1000001137.mm.1 | 1,28                        | PSR1000008620.mm.1 | -2,72  | 0,048042 | 0,559637 Cassette Exon       | 0,16 |
| TC1200001989.mm.1 | 1,19 2310015A10Rik          | JUC1200007583.mm.1 | -2,72  | 0,019075 | 0,472139                     |      |
| TC0600002095.mm.1 | -1,06 Svopl                 | JUC0600008615.mm.1 | -2,72  | 0,045588 | 0,554548                     |      |
| TC0500001690.mm.1 | 1,08                        | JUC0500008425.mm.1 | -2,72  | 0,007441 | 0,399934                     |      |
| TC0600000991.mm.1 | 1,55 1600020E01Rik          | JUC0600003946.mm.1 | -2,72  | 0,03411  | 0,524882                     |      |
| TC0700000776.mm.1 | -1,2 Klk7                   | JUC0700003137.mm.1 | -2,72  | 0,023025 | 0,489209                     |      |
| TC0700004129.mm.1 | -1,02 1700006P19Rik; Far1os | JUC0700017980.mm.1 | -2,72  | 0,018463 | 0,468677                     |      |
| TC0700001718.mm.1 | 1,24 Lyrm1                  | JUC0700007491.mm.1 | -2,72  | 0,009333 | 0,414981                     |      |
| TC1100002907.mm.1 | 1,31 Aldh3a2                | JUC1100013730.mm.1 | -2,72  | 0,022094 | 0,485453                     |      |
| TC0900003244.mm.1 | -1,01 Scn5a                 | JUC0900015361.mm.1 | -2,72  | 0,030468 | 0,513244                     |      |
| TC1800001107.mm.1 | 5,13 Rit2                   | PSR1800008081.mm.1 | -2,73  | 0,004692 | 0,370481 Cassette Exon       | 0,2  |
| TC1800001107.mm.1 | 5,13 Rit2                   | JUC1800004490.mm.1 | -3,37  | 0,009635 | 0,417354                     |      |
| TC1800001107.mm.1 | 5,13 Rit2                   | PSR1800008075.mm.1 | -3,49  | 0,000665 | 0,304044 Alternative 3' Acce | 0,35 |
| TC1800001107.mm.1 | 5,13 Rit2                   | JUC1800004493.mm.1 | -3,76  | 0,041101 | 0,543933                     |      |
| TC1800001107.mm.1 | 5,13 Rit2                   | PSR1800008077.mm.1 | -3,99  | 0,011876 | 0,431125 Cassette Exon       | 0,36 |
| TC1800001107.mm.1 | 5,13 Rit2                   | JUC1800004494.mm.1 | -5,58  | 0,026021 | 0,499406                     |      |
| TC1800001107.mm.1 | 5,13 Rit2                   | PSR1800008084.mm.1 | -7,92  | 0,003852 | 0,358861 Alternative 5' Donc | 0,2  |
| TC1800001107.mm.1 | 5,13 Rit2                   | PSR1800008072.mm.1 | -8,91  | 0,007188 | 0,397891 Alternative 3' Acce | 0,47 |
| TC0200002052.mm.1 | -1,05 Bmp2                  | PSR0200016318.mm.1 | -2,73  | 0,020109 | 0,47686 Cassette Exon        | 0,16 |
| TC0200005495.mm.1 | 1,11 Gm16534                | JUC0200014102.mm.1 | -2,73  | 0,007659 | 0,402377                     |      |



|                   |                           |                    |        |          |          |                     |      |
|-------------------|---------------------------|--------------------|--------|----------|----------|---------------------|------|
| TC1200000967.mm.1 | 1,18 Spata7               | JUC1200003751.mm.1 | -2,73  | 0,021802 | 0,484487 |                     |      |
| TC1200000680.mm.1 | -1,2 Ppp1r36              | JUC1200002740.mm.1 | -2,73  | 0,032196 | 0,518843 |                     |      |
| TC0800002711.mm.1 | -1,1 Ces5a                | JUC0800011315.mm.1 | -2,73  | 0,04842  | 0,560736 |                     |      |
| TC0400001773.mm.1 | 1,19 Atp13a2              | JUC0400007724.mm.1 | -2,73  | 0,001063 | 0,316361 |                     |      |
| TC0400001773.mm.1 | 1,19 Atp13a2              | JUC0400007726.mm.1 | -2,77  | 0,002105 | 0,342919 |                     |      |
| TC0700000087.mm.1 | 2,56 Usp29                | JUC0700000452.mm.1 | -2,74  | 0,012516 | 0,435429 |                     |      |
| TC0700000087.mm.1 | 2,56 Usp29                | JUC0700000455.mm.1 | -3,06  | 0,035542 | 0,528764 |                     |      |
| TC0700000087.mm.1 | 2,56 Usp29                | PSR0700000912.mm.1 | -3,39  | 0,047129 | 0,557915 | Cassette Exon       | 0,42 |
| TC0700000087.mm.1 | 2,56 Usp29                | JUC0700000446.mm.1 | -6,23  | 0,016523 | 0,459611 |                     |      |
| TC1100000238.mm.1 | 1,39 Xpo1                 | PSR1100002000.mm.1 | -2,74  | 0,025991 | 0,499207 | Alternative 5' Donc | 0,28 |
| TC0400004171.mm.1 | -1,18 lsg15               | PSR0400035094.mm.1 | -2,74  | 0,047334 | 0,558291 | Cassette Exon       | 0,16 |
| TC1300002329.mm.1 | 1,15                      | JUC1300008118.mm.1 | -2,74  | 0,025145 | 0,496487 |                     |      |
| TC1800000783.mm.1 | -1,28 Mro                 | JUC1800003087.mm.1 | -2,74  | 0,023994 | 0,492783 |                     |      |
| TC1900000064.mm.1 | 1,26 4930481A15Rik        | JUC1900000412.mm.1 | -2,74  | 0,020244 | 0,477245 |                     |      |
| TC1900000064.mm.1 | 1,26 4930481A15Rik        | JUC1900000417.mm.1 | -4,81  | 0,010454 | 0,421652 |                     |      |
| TC1600000116.mm.1 | -1,05 Ciita               | JUC1600000411.mm.1 | -2,74  | 0,003213 | 0,354243 |                     |      |
| TC0300002553.mm.1 | -1,38 Gm10681; Hsd3b4     | JUC0300010380.mm.1 | -2,74  | 0,018966 | 0,471398 |                     |      |
| TC1100002247.mm.1 | -1,13 Eldr; 2810442I21Rik | JUC1100011365.mm.1 | -2,74  | 0,009479 | 0,416578 |                     |      |
| TC0400001685.mm.1 | 1,97 Gm17388              | JUC0400007019.mm.1 | -2,74  | 0,020912 | 0,479765 |                     |      |
| TC1000000053.mm.1 | 1,47 Ppil4                | PSR1000000421.mm.1 | -2,75  | 0,021009 | 0,480143 | Intron Retention    | 0,44 |
| TC0500003084.mm.1 | -1,05 Hnf1a               | PSR0500027430.mm.1 | -2,75  | 0,016233 | 0,458312 | Alternative 5' Donc | 0,28 |
| TC1100002175.mm.1 | 2,61 Purb; Gm22123        | PSR1100021165.mm.1 | -2,75  | 0,034385 | 0,525677 | Alternative 5' Donc | 0,28 |
| TC1100001123.mm.1 | 1,02 Coro6                | PSR1100010172.mm.1 | -2,75  | 0,036556 | 0,531355 | Alternative 3' Acce | 0,27 |
| TC0900003160.mm.1 | -1,09 Pcd6ip              | PSR0900026709.mm.1 | -2,75  | 0,016563 | 0,459612 | Alternative 3' Acce | 0,24 |
| TC1400000763.mm.1 | 1,57 Cmtm5                | PSR1400005943.mm.1 | -2,75  | 0,044803 | 0,552497 | Cassette Exon       | 0,23 |
| TC0500000582.mm.1 | 1,42 Nwd2; 3110047P20Rik  | PSR0500005167.mm.1 | -2,75  | 0,000509 | 0,303579 | Alternative 3' Acce | 0,19 |
| TC0900001315.mm.1 | 1,59 Cpne4                | PSR0900010267.mm.1 | -2,75  | 0,000008 | 0,179072 | Cassette Exon       | 0,16 |
| TC1200000165.mm.1 | 1,65 Gm5784               | JUC1200000770.mm.1 | -2,75  | 0,045876 | 0,555047 |                     |      |
| TC0500002095.mm.1 | -1,15 Prkag2              | JUC0500010408.mm.1 | -2,75  | 0,015696 | 0,455416 |                     |      |
| TC0500001651.mm.1 | -1,05 Stag3               | JUC0500008237.mm.1 | -2,75  | 0,000944 | 0,313363 |                     |      |
| TC0100001904.mm.1 | 8,48 Rp1                  | JUC0100008928.mm.1 | -2,76  | 0,041059 | 0,543798 |                     |      |
| TC0100001904.mm.1 | 8,48 Rp1                  | PSR0100015721.mm.1 | -3,05  | 0,01896  | 0,471398 | Cassette Exon       | 0,37 |
| TC0100001904.mm.1 | 8,48 Rp1                  | PSR0100015715.mm.1 | -3,08  | 0,018327 | 0,468135 | Cassette Exon       | 0,41 |
| TC0100001904.mm.1 | 8,48 Rp1                  | PSR0100015716.mm.1 | -3,59  | 0,01505  | 0,452177 | Cassette Exon       | 0,45 |
| TC0100001904.mm.1 | 8,48 Rp1                  | JUC0100008927.mm.1 | -4,19  | 0,012866 | 0,437829 |                     |      |
| TC0100001904.mm.1 | 8,48 Rp1                  | PSR0100015723.mm.1 | -4,29  | 0,034431 | 0,525858 | Cassette Exon       | 0,41 |
| TC0100001904.mm.1 | 8,48 Rp1                  | PSR0100015725.mm.1 | -4,9   | 0,002604 | 0,349501 | Alternative 3' Acce | 0,48 |
| TC0100001904.mm.1 | 8,48 Rp1                  | PSR0100015717.mm.1 | -5,91  | 0,034333 | 0,525546 | Cassette Exon       | 0,46 |
| TC0100001904.mm.1 | 8,48 Rp1                  | PSR0100015731.mm.1 | -7,42  | 0,023948 | 0,4926   | Cassette Exon       | 0,41 |
| TC0100001904.mm.1 | 8,48 Rp1                  | JUC0100008929.mm.1 | -8,82  | 0,009914 | 0,418378 |                     |      |
| TC0100001904.mm.1 | 8,48 Rp1                  | PSR0100015718.mm.1 | -9,43  | 0,031033 | 0,515011 | Alternative 3' Acce | 0,24 |
| TC0100001904.mm.1 | 8,48 Rp1                  | PSR0100015720.mm.1 | -9,95  | 0,006462 | 0,390372 | Alternative 5' Donc | 0,33 |
| TC0100001904.mm.1 | 8,48 Rp1                  | PSR0100015722.mm.1 | -16,11 | 0,009985 | 0,418456 | Cassette Exon       | 0,41 |
| TC0100001904.mm.1 | 8,48 Rp1                  | JUC0100008936.mm.1 | -18,57 | 0,003509 | 0,355749 |                     |      |
| TC0100001904.mm.1 | 8,48 Rp1                  | JUC0100008931.mm.1 | -22,01 | 0,015627 | 0,45509  |                     |      |
| TC0100001904.mm.1 | 8,48 Rp1                  | JUC0100008934.mm.1 | -31,49 | 0,025834 | 0,498598 |                     |      |
| TC1700002204.mm.1 | 15,13 Guca1a              | PSR1700020809.mm.1 | -2,76  | 0,02335  | 0,490143 | Cassette Exon       | 0,32 |
| TC1700002204.mm.1 | 15,13 Guca1a              | PSR1700020808.mm.1 | -4,56  | 0,009677 | 0,417605 | Cassette Exon       | 0,41 |

|                   |                               |                    |       |          |          |                          |
|-------------------|-------------------------------|--------------------|-------|----------|----------|--------------------------|
| TC1700002204.mm.1 | 15,13 Guca1a                  | JUC1700011100.mm.1 | -4,68 | 0,047107 | 0,557863 |                          |
| TC1700002204.mm.1 | 15,13 Guca1a                  | PSR1700020812.mm.1 | -7,03 | 0,004774 | 0,371044 | Alternative 5' Donc 0,48 |
| TC0600003266.mm.1 | 1,09 Magohb                   | PSR0600025698.mm.1 | -2,76 | 0,001135 | 0,317344 | Alternative 5' Donc 0,28 |
| TC1300002471.mm.1 | -1,16 Polk                    | PSR1300016560.mm.1 | -2,76 | 0,010171 | 0,419711 | Alternative 5' Donc 0,24 |
| TC1400001243.mm.1 | -1,23 4930524C18Rik           | JUC1400005095.mm.1 | -2,76 | 0,030903 | 0,514574 |                          |
| TC0200002742.mm.1 | 1,35 Gm14408                  | JUC0200011352.mm.1 | -2,76 | 0,003045 | 0,353892 |                          |
| TC1700001088.mm.1 | 1,09                          | JUC1700005538.mm.1 | -2,76 | 0,015448 | 0,454271 |                          |
| TC1700001929.mm.1 | 1,04 Skiv2l; Mir6970; mmu-mii | JUC1700009758.mm.1 | -2,76 | 0,000406 | 0,297771 |                          |
| TC1500000659.mm.1 | 1,06 Nol12                    | JUC1500002780.mm.1 | -2,76 | 0,008474 | 0,406734 |                          |
| TC0800000977.mm.1 | 1,32 Tnp02                    | JUC0800003957.mm.1 | -2,76 | 0,03092  | 0,514584 |                          |
| TC0500001663.mm.1 | 1,31 Fam20c                   | JUC0500008308.mm.1 | -2,76 | 0,021288 | 0,481708 |                          |
| TC0400000426.mm.1 | 1,1 Dnajb5                    | JUC0400001303.mm.1 | -2,76 | 0,031486 | 0,516965 |                          |
| TC0300002354.mm.1 | -1,6                          | JUC0300009501.mm.1 | -2,76 | 0,008134 | 0,405267 |                          |
| TC1300002772.mm.1 | 1,03 Zfp595                   | PSR1300014583.mm.1 | -2,77 | 0,020802 | 0,479494 | Intron Retention 0,27    |
| TC0500000373.mm.1 | 1,99 Rnf4                     | PSR0500003540.mm.1 | -2,77 | 0,016641 | 0,459985 | Alternative 3' Acce 0,24 |
| TC0500000373.mm.1 | 1,99 Rnf4                     | PSR0500003563.mm.1 | -3,2  | 0,018168 | 0,467441 | Cassette Exon 0,22       |
| TC0100000381.mm.1 | 1,08 Hibch                    | PSR0100002975.mm.1 | -2,77 | 0,040023 | 0,54127  | Cassette Exon 0,21       |
| TC0300002532.mm.1 | -1,11 Gja8                    | PSR0300019759.mm.1 | -2,77 | 0,046279 | 0,556186 | Alternative 5' Donc 0,21 |
| TC1200002089.mm.1 | -1,03 Pgf                     | JUC1200007971.mm.1 | -2,77 | 0,026862 | 0,502454 |                          |
| TC1300000303.mm.1 | -1,27 Prl8a2                  | JUC1300000955.mm.1 | -2,77 | 0,00458  | 0,369794 |                          |
| TC1500000705.mm.1 | 1,68 Tnrc6b; Mir5113          | JUC1500003054.mm.1 | -2,77 | 0,011089 | 0,425942 |                          |
| TC0700004397.mm.1 | 1,11 2310057M21Rik            | JUC0700019493.mm.1 | -2,77 | 0,015164 | 0,452699 |                          |
| TC0400001163.mm.1 | -1,04 Calr4                   | JUC0400004338.mm.1 | -2,77 | 0,002577 | 0,349501 |                          |
| TC0100000164.mm.1 | 1,36 Col9a1                   | PSR0100001081.mm.1 | -2,78 | 0,000813 | 0,311886 | Alternative 5' Donc 0,29 |
| TC0600002980.mm.1 | -1,4 Tmem72                   | PSR0600022953.mm.1 | -2,78 | 0,018787 | 0,470789 | Cassette Exon 0,15       |
| TC1400001993.mm.1 | 1,4 Osgep                     | JUC1400008198.mm.1 | -2,78 | 0,008635 | 0,408463 |                          |
| TC1200001035.mm.1 | -1,15 Serpina4-ps1            | JUC1200004140.mm.1 | -2,78 | 0,03238  | 0,519221 |                          |
| TC1700002000.mm.1 | 1,05 Gm9574                   | JUC1700010242.mm.1 | -2,78 | 0,009074 | 0,412827 |                          |
| TC1400002725.mm.1 | -1,19 Oxgr1                   | JUC1400011179.mm.1 | -2,78 | 0,021109 | 0,480525 |                          |
| TC0700001106.mm.1 | -1,16                         | JUC0700004990.mm.1 | -2,78 | 0,022215 | 0,485896 |                          |
| TC0900001380.mm.1 | 6,76                          | PSR0900010883.mm.1 | -2,79 | 0,023907 | 0,492316 | Alternative 3' Acce 0,29 |
| TC0900001380.mm.1 | 6,76                          | JUC0900005984.mm.1 | -6,13 | 0,008749 | 0,409704 |                          |
| TC0X00002036.mm.1 | -1,09 Gm14552; Gm3669; Gm21   | PSR0X00012930.mm.1 | -2,79 | 0,047206 | 0,558132 | Alternative 3' Acce 0,29 |
| TC1700000419.mm.1 | 1,32 Crebrf                   | PSR1700003581.mm.1 | -2,79 | 0,005593 | 0,381047 | Alternative 3' Acce 0,28 |
| TC0200003607.mm.1 | -1,05 Rbms1                   | PSR0200030809.mm.1 | -2,79 | 0,01331  | 0,441836 | Alternative 3' Acce 0,23 |
| TC0800003099.mm.1 | -1,16 Fanca                   | PSR0800024118.mm.1 | -2,79 | 0,016935 | 0,460959 | Cassette Exon 0,17       |
| TC0800001050.mm.1 | 1,25 Chd9                     | PSR0800008086.mm.1 | -2,79 | 0,012302 | 0,434371 | Cassette Exon 0,12       |
| TC1700000923.mm.1 | 1,02 Pgc                      | JUC1700004744.mm.1 | -2,79 | 0,043834 | 0,550456 |                          |
| TC0100000258.mm.1 | 1,01 Cnga3                    | JUC0100000987.mm.1 | -2,79 | 0,037208 | 0,533262 |                          |
| TC1800001595.mm.1 | 1,03 Lipg                     | JUC1800006407.mm.1 | -2,79 | 0,0203   | 0,477245 |                          |
| TC1000003140.mm.1 | 1,18 Coq10a                   | JUC1000012955.mm.1 | -2,79 | 0,020305 | 0,477245 |                          |
| TC0X00003395.mm.1 | -1,08 Med12                   | JUC0X00003153.mm.1 | -2,79 | 0,009178 | 0,41357  |                          |
| TC0900000262.mm.1 | 4,43 Opcml                    | JUC0900001087.mm.1 | -2,8  | 0,043533 | 0,549995 |                          |
| TC0900000262.mm.1 | 4,43 Opcml                    | PSR0900002000.mm.1 | -3,52 | 0,027091 | 0,503022 | Alternative 3' Acce 0,35 |
| TC0900000262.mm.1 | 4,43 Opcml                    | PSR0900001994.mm.1 | -3,77 | 0,034144 | 0,524893 | Cassette Exon 0,34       |
| TC0900000262.mm.1 | 4,43 Opcml                    | PSR0900001989.mm.1 | -3,85 | 0,046084 | 0,555668 | Cassette Exon 0,26       |
| TC0900000262.mm.1 | 4,43 Opcml                    | JUC0900001090.mm.1 | -3,85 | 0,041235 | 0,544134 |                          |
| TC0900000262.mm.1 | 4,43 Opcml                    | PSR0900001996.mm.1 | -4,58 | 0,037508 | 0,533968 | Alternative 5' Donc 0,16 |

|                   |       |                        |                    |        |          |          |                     |      |
|-------------------|-------|------------------------|--------------------|--------|----------|----------|---------------------|------|
| TC0900000262.mm.1 | 4,43  | Opcml                  | PSR0900002005.mm.1 | -7,36  | 0,040538 | 0,542414 | Cassette Exon       | 0,28 |
| TC0900000262.mm.1 | 4,43  | Opcml                  | PSR0900001997.mm.1 | -7,85  | 0,032391 | 0,519278 | Cassette Exon       | 0,16 |
| TC0900000262.mm.1 | 4,43  | Opcml                  | PSR0900001991.mm.1 | -11,18 | 0,015091 | 0,452418 | Alternative 3' Acce | 0,04 |
| TC0900000262.mm.1 | 4,43  | Opcml                  | JUC0900001089.mm.1 | -13,06 | 0,006947 | 0,395542 |                     |      |
| TC0900000262.mm.1 | 4,43  | Opcml                  | JUC0900001091.mm.1 | -14,99 | 0,006423 | 0,389915 |                     |      |
| TC1000002074.mm.1 | 1,44  |                        | PSR1000014818.mm.1 | -2,8   | 0,004968 | 0,373851 | Cassette Exon       | 0,15 |
| TC1400000748.mm.1 | 1,02  | Rem2                   | JUC1400003132.mm.1 | -2,8   | 0,0329   | 0,521149 |                     |      |
| TC0500001980.mm.1 | -1,31 | Speer4c                | JUC0500009830.mm.1 | -2,8   | 0,03849  | 0,536557 |                     |      |
| TC0900001016.mm.1 | 1,13  | Leo1                   | JUC0900004363.mm.1 | -2,8   | 0,011134 | 0,426153 |                     |      |
| TC0400000481.mm.1 | -1,23 | Grhpr                  | JUC0400001639.mm.1 | -2,8   | 0,037135 | 0,533013 |                     |      |
| TC0400003605.mm.1 | 1,12  | Dcdc2b                 | JUC0400015335.mm.1 | -2,8   | 0,007941 | 0,403819 |                     |      |
| TC0900003066.mm.1 | 1,59  | Arih2; Gm26298         | PSR0900025834.mm.1 | -2,81  | 0,024334 | 0,49362  | Alternative 5' Donc | 0,29 |
| TC1100002064.mm.1 | 1,89  | Fn3krp                 | PSR1100019932.mm.1 | -2,81  | 0,037426 | 0,533831 | Alternative 3' Acce | 0,29 |
| TC1400002661.mm.1 | -1,3  | Mir6390; mmu-mir-6390; | PSR1400019945.mm.1 | -2,81  | 0,000524 | 0,304044 | Intron Retention    | 0,14 |
| TC1700000355.mm.1 | 1,08  | Igfals                 | JUC1700001530.mm.1 | -2,81  | 0,040131 | 0,541572 |                     |      |
| TC0800001422.mm.1 | -1,01 | Dnaaf1                 | JUC0800006334.mm.1 | -2,81  | 0,009163 | 0,413447 |                     |      |
| TC0800000390.mm.1 | -1,12 | Tex15                  | JUC0800001556.mm.1 | -2,81  | 0,03322  | 0,522175 |                     |      |
| TC0700000077.mm.1 | 1,8   | Zfp78                  | JUC0700000429.mm.1 | -2,81  | 0,04542  | 0,554105 |                     |      |
| TC0700000077.mm.1 | 1,8   | Zfp78                  | JUC0700000427.mm.1 | -3,23  | 0,009186 | 0,413756 |                     |      |
| TC0500002994.mm.1 | -1,06 | Ep400; Gm26079         | JUC0500014506.mm.1 | -2,81  | 0,006202 | 0,387873 |                     |      |
| TC0900002300.mm.1 | 2,33  | Al593442               | PSR0900019156.mm.1 | -2,82  | 0,013944 | 0,446234 | Cassette Exon       | 0,19 |
| TC0600001972.mm.1 | 1,9   | Prnt4                  | JUC0600008090.mm.1 | -2,82  | 0,033973 | 0,524252 |                     |      |
| TC1100000621.mm.1 | 1,39  | Acsl6                  | JUC1100002598.mm.1 | -2,82  | 0,026312 | 0,500687 |                     |      |
| TC1100000621.mm.1 | 1,39  | Acsl6                  | JUC1100002603.mm.1 | -3,14  | 0,02797  | 0,505748 |                     |      |
| TC1100001785.mm.1 | -1,23 | Milr1; Gm885           | JUC1100008779.mm.1 | -2,82  | 0,036436 | 0,530977 |                     |      |
| TC1100001785.mm.1 | -1,23 | Milr1; Gm885           | JUC1100008772.mm.1 | -3,21  | 0,014694 | 0,450265 |                     |      |
| TC0900002009.mm.1 | -1,07 | Foxred1                | JUC0900009442.mm.1 | -2,82  | 0,047088 | 0,557835 |                     |      |
| TC0400002041.mm.1 | 1,13  | Wrap73                 | JUC0400008833.mm.1 | -2,82  | 0,020681 | 0,478929 |                     |      |
| TC0X00002292.mm.1 | 1,52  | Fgf13                  | JUC0X00007402.mm.1 | -2,83  | 0,041104 | 0,543933 |                     |      |
| TC0X00002292.mm.1 | 1,52  | Fgf13                  | PSR0X00014505.mm.1 | -2,91  | 0,045075 | 0,553115 | Cassette Exon       | 0,26 |
| TC0600001372.mm.1 | -1,64 | A2m                    | PSR0600010993.mm.1 | -2,83  | 0,003499 | 0,355638 | Cassette Exon       | 0,2  |
| TC0200002584.mm.1 | 1,63  | 1110018N20Rik          | PSR0200021276.mm.1 | -2,83  | 0,00057  | 0,304044 | Cassette Exon       | 0,1  |
| TC1700002688.mm.1 | 1,05  | 4833418N02Rik          | JUC1700013136.mm.1 | -2,83  | 0,001987 | 0,341091 |                     |      |
| TC0800001223.mm.1 | 1,06  | Ctcf                   | JUC0800005269.mm.1 | -2,83  | 0,041306 | 0,544259 |                     |      |
| TC0600000940.mm.1 | 1,11  |                        | JUC0600003647.mm.1 | -2,83  | 0,030089 | 0,511932 |                     |      |
| TC0600001163.mm.1 | -1,53 |                        | JUC0600004586.mm.1 | -2,83  | 0,040578 | 0,542469 |                     |      |
| TC0500003111.mm.1 | 1,12  | Tmem233                | JUC0500015089.mm.1 | -2,83  | 0,045269 | 0,553703 |                     |      |
| TC1100002195.mm.1 | 1,3   | Igfbp3                 | JUC1100011129.mm.1 | -2,83  | 0,038014 | 0,535454 |                     |      |
| TC0500000036.mm.1 | -1,27 |                        | PSR0500000328.mm.1 | -2,83  | 0,005744 | 0,382993 |                     |      |
| TC0700001576.mm.1 | 1,19  | Syt9                   | PSR0700013197.mm.1 | -2,84  | 0,010244 | 0,420147 | Alternative 3' Acce | 0,29 |
| TC1900000425.mm.1 | 1,42  |                        | JUC1900002044.mm.1 | -2,84  | 0,013385 | 0,442388 |                     |      |
| TC1900000425.mm.1 | 1,42  |                        | PSR1900003934.mm.1 | -3,19  | 0,016337 | 0,458616 | Alternative 3' Acce | 0,27 |
| TC1000001309.mm.1 | 2,09  | Kcnc2                  | PSR1000009802.mm.1 | -2,84  | 0,032042 | 0,518459 | Cassette Exon       | 0,17 |
| TC1100004174.mm.1 | 2,13  | Gm11754                | JUC1100020855.mm.1 | -2,84  | 0,015894 | 0,456526 |                     |      |
| TC1100004174.mm.1 | 2,13  | Gm11754                | JUC1100020856.mm.1 | -3,48  | 0,019307 | 0,473208 |                     |      |
| TC1200002493.mm.1 | 1,34  | Wdr60                  | JUC1200010434.mm.1 | -2,84  | 0,019432 | 0,473969 |                     |      |
| TC1300000444.mm.1 | 1,23  |                        | JUC1300001378.mm.1 | -2,84  | 0,016811 | 0,460623 |                     |      |
| TC0100000954.mm.1 | -1,05 | Neu4                   | JUC0100004663.mm.1 | -2,84  | 0,018297 | 0,468049 |                     |      |

|                   |                               |                    |        |          |          |                          |
|-------------------|-------------------------------|--------------------|--------|----------|----------|--------------------------|
| TC0800002242.mm.1 | 1,01                          | JUC0800009296.mm.1 | -2,84  | 0,028274 | 0,506588 |                          |
| TC0600002800.mm.1 | -1,61 Lmod3                   | JUC0600011302.mm.1 | -2,84  | 0,035942 | 0,529399 |                          |
| TC0700003014.mm.1 | 1,73 A030001D20Rik; Gm1604    | JUC0700014606.mm.1 | -2,84  | 0,014016 | 0,446478 |                          |
| TC1000002535.mm.1 | -1,24 Tjp3                    | JUC1000010420.mm.1 | -2,84  | 0,011639 | 0,42984  |                          |
| TC0400003938.mm.1 | 1,03 Pramel5                  | JUC0400016997.mm.1 | -2,84  | 0,03302  | 0,521478 |                          |
| TC1000001038.mm.1 | 1,18 Pwp1                     | JUC1000004196.mm.1 | -2,84  | 0,045459 | 0,554224 |                          |
| TC0800001433.mm.1 | 3,45 Gm15898                  | PSR0800011749.mm.1 | -2,85  | 0,024114 | 0,49322  | Cassette Exon 0,17       |
| TC0600001479.mm.1 | -1,08 9330179D12Rik           | PSR0600012188.mm.1 | -2,85  | 0,00909  | 0,412827 | Cassette Exon 0,16       |
| TC0200005283.mm.1 | 1,22                          | JUC0200023216.mm.1 | -2,85  | 0,030307 | 0,512738 |                          |
| TC0200004408.mm.1 | 1,22 A930104D05Rik            | JUC0200018830.mm.1 | -2,85  | 0,012651 | 0,43631  |                          |
| TC1700002588.mm.1 | 1,29 Map4k3                   | JUC1700012765.mm.1 | -2,85  | 0,049348 | 0,562803 |                          |
| TC1600000759.mm.1 | -1,08                         | JUC1600003496.mm.1 | -2,85  | 0,004649 | 0,370181 |                          |
| TC0900001101.mm.1 | -1,03 Ttk                     | JUC0900004693.mm.1 | -2,85  | 0,008835 | 0,410293 |                          |
| TC0400000916.mm.1 | -1,22 Gm12609; Gm12610        | JUC0400003137.mm.1 | -2,85  | 0,031994 | 0,518312 |                          |
| TC1100002777.mm.1 | -1 Slc36a2                    | JUC1100013091.mm.1 | -2,85  | 0,049749 | 0,563589 |                          |
| TC0700001284.mm.1 | 2,55 Dlg2                     | PSR0700011110.mm.1 | -2,86  | 0,014047 | 0,44654  | Alternative 5' Donc 0,26 |
| TC1900000005.mm.1 | -1,12 Mrpl21                  | JUC1900000008.mm.1 | -2,86  | 0,010051 | 0,418902 |                          |
| TC0600001648.mm.1 | 1,01 Pik3c2g                  | JUC0600006877.mm.1 | -2,86  | 0,020713 | 0,479166 |                          |
| TC0500003175.mm.1 | -2,59 Oas2                    | JUC0500015347.mm.1 | -2,86  | 0,045926 | 0,555257 |                          |
| TC1100001131.mm.1 | 1,21 Nufip2                   | JUC1100005386.mm.1 | -2,86  | 0,007156 | 0,397811 |                          |
| TC0300002617.mm.1 | 1,04 Tshb                     | JUC0300010631.mm.1 | -2,86  | 0,036501 | 0,5313   |                          |
| TC0400003738.mm.1 | 1,01 Extl1                    | JUC0400016001.mm.1 | -2,86  | 0,002649 | 0,349612 |                          |
| TC1100003511.mm.1 | 4,97 Dgke                     | JUC1100016812.mm.1 | -2,87  | 0,044904 | 0,55271  |                          |
| TC1100003511.mm.1 | 4,97 Dgke                     | PSR1100032135.mm.1 | -3,1   | 0,00107  | 0,316484 | Alternative 3' Acce 0,34 |
| TC1100003511.mm.1 | 4,97 Dgke                     | PSR1100032147.mm.1 | -3,15  | 0,014932 | 0,451919 | Cassette Exon 0,33       |
| TC1100003511.mm.1 | 4,97 Dgke                     | PSR1100032143.mm.1 | -3,79  | 0,001358 | 0,325659 | Alternative 5' Donc 0,42 |
| TC1100003511.mm.1 | 4,97 Dgke                     | PSR1100032145.mm.1 | -5,08  | 0,000985 | 0,315219 | Cassette Exon 0,16       |
| TC1100003511.mm.1 | 4,97 Dgke                     | PSR1100032146.mm.1 | -5,68  | 0,007456 | 0,400326 | Cassette Exon 0,32       |
| TC1100003511.mm.1 | 4,97 Dgke                     | JUC1100016806.mm.1 | -6,67  | 0,000274 | 0,28803  |                          |
| TC1100003511.mm.1 | 4,97 Dgke                     | PSR1100032144.mm.1 | -7,83  | 0,004688 | 0,3704   | Alternative 5' Donc 0,42 |
| TC1100003511.mm.1 | 4,97 Dgke                     | JUC1100016808.mm.1 | -13,87 | 0,001809 | 0,336544 |                          |
| TC0500000019.mm.1 | 1,52 Krit1                    | PSR0500000177.mm.1 | -2,87  | 0,024291 | 0,49362  | Intron Retention 0,33    |
| TC0500000019.mm.1 | 1,52 Krit1                    | JUC0500000097.mm.1 | -4,54  | 0,008487 | 0,406895 |                          |
| TC1700000717.mm.1 | 1,43 A930015D03Rik            | PSR1700007382.mm.1 | -2,87  | 0,012491 | 0,435429 | Alternative 3' Acce 0,28 |
| TC0400000413.mm.1 | 2,97 Ccl27b; Ccl27a; LOC10086 | PSR0400002645.mm.1 | -2,87  | 0,005007 | 0,373851 | Cassette Exon 0,23       |
| TC0400000413.mm.1 | 2,97 Ccl27b; Ccl27a; LOC10086 | JUC0400001277.mm.1 | -3,71  | 0,005208 | 0,377078 |                          |
| TC0100001749.mm.1 | 1 Capn8                       | PSR0100014598.mm.1 | -2,87  | 0,040208 | 0,541714 | Cassette Exon 0,14       |
| TC0200002721.mm.1 | 1,07 Gm14436; Gm14306; Gm1    | JUC0200011284.mm.1 | -2,87  | 0,000093 | 0,256273 |                          |
| TC1300000099.mm.1 | 1,1                           | JUC1300000456.mm.1 | -2,87  | 0,007405 | 0,399876 |                          |
| TC1700001034.mm.1 | -1,5 Emr1                     | JUC1700005334.mm.1 | -2,87  | 0,041856 | 0,545617 |                          |
| TC1900000327.mm.1 | -1,38 Trpm6                   | JUC1900001692.mm.1 | -2,87  | 0,025917 | 0,499027 |                          |
| TC0600003000.mm.1 | -1,12 Bms1                    | JUC0600011965.mm.1 | -2,87  | 0,021252 | 0,481431 |                          |
| TC0700002815.mm.1 | -1,07 Scgb2b23-ps; Scgb2b1    | JUC0700013451.mm.1 | -2,87  | 0,02548  | 0,497664 |                          |
| TC0500003208.mm.1 | 1,44 Fam216a                  | JUC0500015621.mm.1 | -2,87  | 0,044404 | 0,5515   |                          |
| TC0700003652.mm.1 | -1,09 Arnt2                   | JUC0700016385.mm.1 | -2,87  | 0,031756 | 0,517489 |                          |
| TC0400003215.mm.1 | -1,14 Mrpl37                  | JUC0400013317.mm.1 | -2,87  | 0,00365  | 0,356935 |                          |
| TC0500000084.mm.1 | -1,14 Sema3a                  | JUC0500000430.mm.1 | -2,87  | 0,01198  | 0,432263 |                          |
| TC0400003826.mm.1 | 1,17 Vwa5b1                   | JUC0400016382.mm.1 | -2,87  | 0,0065   | 0,39101  |                          |

|                   |                        |                    |       |          |                              |  |      |
|-------------------|------------------------|--------------------|-------|----------|------------------------------|--|------|
| TC100000506.mm.1  | 1,28 Pkib              | JUC100001823.mm.1  | -2,87 | 0,038116 | 0,535709                     |  |      |
| TC1200000817.mm.1 | 5,07 Vsx2              | JUC1200003334.mm.1 | -2,88 | 0,008155 | 0,40551                      |  |      |
| TC1200000817.mm.1 | 5,07 Vsx2              | PSR1200005901.mm.1 | -5,82 | 0,006601 | 0,39213 Alternative 3' Acce  |  | 0,42 |
| TC0400002404.mm.1 | 2,15 Gm12366           | PSR0400019510.mm.1 | -2,88 | 0,005819 | 0,383169                     |  |      |
| TC0400002404.mm.1 | 2,15 Gm12366           | PSR0400019509.mm.1 | -7,03 | 0,001969 | 0,340561 Alternative 3' Acce |  | 0,18 |
| TC1400002129.mm.1 | 1,51 C030013D06Rik     | PSR1400016422.mm.1 | -2,88 | 0,022531 | 0,487133 Alternative 5' Donc |  | 0,08 |
| TC1400000872.mm.1 | -1,19 Gm27017          | JUC1400003808.mm.1 | -2,88 | 0,008537 | 0,407916                     |  |      |
| TC0900001442.mm.1 | -1,25 Cdc25a           | JUC0900006679.mm.1 | -2,88 | 0,0355   | 0,528724                     |  |      |
| TC0600001238.mm.1 | -1,01 Thumpd3; Gm22591 | JUC0600004857.mm.1 | -2,88 | 0,000403 | 0,297771                     |  |      |
| TC0600002118.mm.1 | 1,14                   | JUC0600008762.mm.1 | -2,88 | 0,020801 | 0,479493                     |  |      |
| TC0X00001071.mm.1 | 1,59 Ppk1              | JUC0X00003501.mm.1 | -2,88 | 0,000358 | 0,290838                     |  |      |
| TC0400003942.mm.1 | 1,02 Pramef12          | JUC0400017002.mm.1 | -2,88 | 0,027546 | 0,504425                     |  |      |
| TC0300000605.mm.1 | 5,01 Serpini1          | JUC0300002088.mm.1 | -2,89 | 0,024367 | 0,49362                      |  |      |
| TC0300000605.mm.1 | 5,01 Serpini1          | JUC0300002087.mm.1 | -4,49 | 0,004142 | 0,3623                       |  |      |
| TC0300000605.mm.1 | 5,01 Serpini1          | PSR0300003999.mm.1 | -4,53 | 0,007304 | 0,398847 Cassette Exon       |  | 0,41 |
| TC0300000605.mm.1 | 5,01 Serpini1          | PSR0300004002.mm.1 | -6,17 | 0,003492 | 0,355638 Intron Retention    |  | 0,54 |
| TC0300000605.mm.1 | 5,01 Serpini1          | PSR0300004000.mm.1 | -7,1  | 0,001503 | 0,329896 Cassette Exon       |  | 0,07 |
| TC0900002355.mm.1 | 3,35 Lingo1            | PSR0900019741.mm.1 | -2,89 | 0,007869 | 0,403545 Cassette Exon       |  | 0,23 |
| TC0900002355.mm.1 | 3,35 Lingo1            | PSR0900019735.mm.1 | -3,54 | 0,044425 | 0,551566 Cassette Exon       |  | 0,17 |
| TC0900002355.mm.1 | 3,35 Lingo1            | PSR0900019737.mm.1 | -3,7  | 0,019004 | 0,471669 Cassette Exon       |  | 0,3  |
| TC0900002355.mm.1 | 3,35 Lingo1            | PSR0900019739.mm.1 | -4,16 | 0,002371 | 0,34829 Cassette Exon        |  | 0,28 |
| TC0900002355.mm.1 | 3,35 Lingo1            | PSR0900019740.mm.1 | -4,46 | 0,001454 | 0,328414 Cassette Exon       |  | 0,28 |
| TC0900002355.mm.1 | 3,35 Lingo1            | PSR0900019731.mm.1 | -4,55 | 0,012121 | 0,432781 Alternative 3' Acce |  | 0,48 |
| TC0900002355.mm.1 | 3,35 Lingo1            | JUC0900011141.mm.1 | -5,16 | 0,007564 | 0,401384                     |  |      |
| TC0900002355.mm.1 | 3,35 Lingo1            | JUC0900011137.mm.1 | -5,76 | 0,020524 | 0,478276                     |  |      |
| TC0900001594.mm.1 | 1,58 Slc25a38          | PSR0900013329.mm.1 | -2,89 | 0,013251 | 0,441416 Alternative 5' Donc |  | 0,3  |
| TC1400002031.mm.1 | 1,83 Rab2b             | JUC1400008367.mm.1 | -2,89 | 0,002816 | 0,352207                     |  |      |
| TC0100003058.mm.1 | -1,24 Srgap2           | JUC0100013952.mm.1 | -2,89 | 0,003402 | 0,354888                     |  |      |
| TC0X00000888.mm.1 | 1,54 Pcyt1b            | JUC0X00002809.mm.1 | -2,89 | 0,000656 | 0,304044                     |  |      |
| TC0X00001977.mm.1 | 1,01 E330010L02Rik     | JUC0X00006355.mm.1 | -2,89 | 0,03406  | 0,524583                     |  |      |
| TC1400002280.mm.1 | 4,03 Dpysl2            | PSR1400017606.mm.1 | -2,9  | 0,023575 | 0,490947 Alternative 5' Donc |  | 0,27 |
| TC1400002280.mm.1 | 4,03 Dpysl2            | PSR1400017590.mm.1 | -4,5  | 0,005797 | 0,383104 Alternative 3' Acce |  | 0,39 |
| TC0400001710.mm.1 | 2,34 Usp48             | PSR0400013827.mm.1 | -2,9  | 0,031159 | 0,515677 Cassette Exon       |  | 0,18 |
| TC0400001710.mm.1 | 2,34 Usp48             | PSR0400013776.mm.1 | -3    | 0,048335 | 0,560493 Alternative 5' Donc |  | 0,26 |
| TC0400001710.mm.1 | 2,34 Usp48             | PSR0400013818.mm.1 | -3,42 | 0,002526 | 0,349501 Alternative 3' Acce |  | 0,31 |
| TC1100001111.mm.1 | -2,53 Slc6a4           | PSR1100010117.mm.1 | -2,9  | 0,000594 | 0,304044 Alternative 5' Donc |  | 0,3  |
| TC0900000716.mm.1 | 1,9 Gm17231            | PSR0900005262.mm.1 | -2,9  | 0,030544 | 0,51337 Cassette Exon        |  | 0,18 |
| TC0900000716.mm.1 | 1,9 Gm17231            | PSR0900005263.mm.1 | -4,19 | 0,035231 | 0,52837 Cassette Exon        |  | 0,28 |
| TC1600002084.mm.1 | 1,51 Cryz1             | JUC1600008298.mm.1 | -2,9  | 0,001387 | 0,325997                     |  |      |
| TC1600002084.mm.1 | 1,51 Cryz1             | JUC1600008299.mm.1 | -3,06 | 0,002607 | 0,349501                     |  |      |
| TC0800001941.mm.1 | -1,04                  | JUC0800008456.mm.1 | -2,9  | 0,006508 | 0,391259                     |  |      |
| TC0300002554.mm.1 | -1,15 Hsd3b5           | JUC0300010389.mm.1 | -2,9  | 0,006206 | 0,387873                     |  |      |
| TC0200003760.mm.1 | 2,92                   | PSR0200032173.mm.1 | -2,91 | 0,036283 | 0,530445 Cassette Exon       |  | 0,33 |
| TC0200003760.mm.1 | 2,92                   | PSR0200032174.mm.1 | -3,16 | 0,032039 | 0,518459 Cassette Exon       |  | 0,22 |
| TC0200003760.mm.1 | 2,92                   | JUC0200016428.mm.1 | -3,89 | 0,001073 | 0,316484                     |  |      |
| TC0200000242.mm.1 | 1,04 Stam              | PSR0200001013.mm.1 | -2,91 | 0,017503 | 0,463964 Alternative 5' Donc |  | 0,32 |
| TC0700004292.mm.1 | 1,68 Slx1b; Gm6939     | PSR0700035871.mm.1 | -2,91 | 0,041554 | 0,544941 Cassette Exon       |  | 0,19 |
| TC0300001452.mm.1 | 1,29 9530052C20Rik     | PSR0300011730.mm.1 | -2,91 | 0,033222 | 0,522175 Cassette Exon       |  | 0,18 |

|                   |                       |                    |        |          |                              |      |
|-------------------|-----------------------|--------------------|--------|----------|------------------------------|------|
| TC0700003191.mm.1 | 10,72                 | PSR0700028387.mm.1 | -2,91  | 0,038836 | 0,537731 Cassette Exon       | 0,07 |
| TC0700003191.mm.1 | 10,72                 | JUC0700015094.mm.1 | -3,04  | 0,007051 | 0,396358                     |      |
| TC0700003191.mm.1 | 10,72                 | JUC0700015092.mm.1 | -21,13 | 0,00444  | 0,367041                     |      |
| TC0100000652.mm.1 | 1,62 Fam134a          | JUC0100003131.mm.1 | -2,91  | 0,005614 | 0,381163                     |      |
| TC0100000652.mm.1 | 1,62 Fam134a          | JUC0100003132.mm.1 | -3,24  | 0,043087 | 0,548459                     |      |
| TC0700002913.mm.1 | -1,03 Vmn2r-ps56      | JUC0700013840.mm.1 | -2,91  | 0,008986 | 0,411965                     |      |
| TC1000003230.mm.1 | 1,06 Vmn2r85          | JUC1000013187.mm.1 | -2,91  | 0,038342 | 0,53622                      |      |
| TC1100002486.mm.1 | -1 Npm1               | JUC1100012025.mm.1 | -2,91  | 0,020331 | 0,477255                     |      |
| TC0200005421.mm.1 | 5,32 Bhlhe23; Gm14343 | PSR0200046167.mm.1 | -2,92  | 0,003368 | 0,354278 Alternative 3' Acce | 0,29 |
| TC0200005421.mm.1 | 5,32 Bhlhe23; Gm14343 | PSR0200046172.mm.1 | -4,92  | 0,001291 | 0,322541 Alternative 5' Donc | 0,48 |
| TC0200005421.mm.1 | 5,32 Bhlhe23; Gm14343 | PSR0200046173.mm.1 | -5,13  | 0,004138 | 0,3623 Alternative 5' Donc   | 0,48 |
| TC0200005421.mm.1 | 5,32 Bhlhe23; Gm14343 | PSR0200046176.mm.1 | -6,46  | 0,005092 | 0,375649 Alternative 5' Donc | 0,48 |
| TC0200005421.mm.1 | 5,32 Bhlhe23; Gm14343 | PSR0200046166.mm.1 | -8,49  | 0,000186 | 0,284485 Cassette Exon       | 0,28 |
| TC0200005421.mm.1 | 5,32 Bhlhe23; Gm14343 | PSR0200046165.mm.1 | -8,59  | 0,001278 | 0,322251 Cassette Exon       | 0,28 |
| TC1300000928.mm.1 | -1,03 Mctp1           | PSR1300006052.mm.1 | -2,92  | 0,019262 | 0,473074 Alternative 5' Donc | 0,28 |
| TC1200001252.mm.1 | 1,1 Tdrd9             | JUC1200004895.mm.1 | -2,92  | 0,005283 | 0,378059                     |      |
| TC0300001083.mm.1 | -1,04 St7l            | JUC0300004543.mm.1 | -2,92  | 0,024337 | 0,49362                      |      |
| TC0200004701.mm.1 | 1,44 Pak7             | JUC0200020885.mm.1 | -2,92  | 0,004447 | 0,367215                     |      |
| TC1500001862.mm.1 | 1,03 1700088E04Rik    | JUC1500008278.mm.1 | -2,92  | 0,003816 | 0,35811                      |      |
| TC0200000223.mm.1 | 1,12 Ankrd16          | JUC0200000369.mm.1 | -2,92  | 0,031857 | 0,517902                     |      |
| TC1100001909.mm.1 | -1,34 Myo15b          | JUC1100009408.mm.1 | -2,92  | 0,020736 | 0,479172                     |      |
| TC0300001987.mm.1 | 1,3 Exosc8            | PSR0300015143.mm.1 | -2,93  | 0,014294 | 0,448073 Cassette Exon       | 0,18 |
| TC0200004713.mm.1 | 1,33 Jag1             | JUC0200020925.mm.1 | -2,93  | 0,012798 | 0,437255                     |      |
| TC1400002631.mm.1 | -1,07                 | JUC1400010785.mm.1 | -2,93  | 0,007133 | 0,397309                     |      |
| TC0700000860.mm.1 | 1,37 Car11            | JUC0700003738.mm.1 | -2,93  | 0,007852 | 0,403345                     |      |
| TC0300003103.mm.1 | -1,05 Dnase2b         | JUC0300012803.mm.1 | -2,93  | 0,01466  | 0,450098                     |      |
| TC0400000994.mm.1 | 1,09 Gm12705          | JUC0400003430.mm.1 | -2,93  | 0,018579 | 0,469618                     |      |
| TC0300001512.mm.1 | 1,64 Gm1653           | JUC0300006448.mm.1 | -2,93  | 0,004694 | 0,370496                     |      |
| TC1800000342.mm.1 | 1,05 Tmco6            | JUC1800001508.mm.1 | -2,94  | 0,034563 | 0,525975                     |      |
| TC0500001849.mm.1 | -1,03 Tex26           | JUC0500009207.mm.1 | -2,94  | 0,034845 | 0,526823                     |      |
| TC0500000560.mm.1 | -1,07 Pcdh7           | JUC0500002848.mm.1 | -2,94  | 0,0428   | 0,548097                     |      |
| TC0900001398.mm.1 | 1,66 Nicn1            | JUC0900006152.mm.1 | -2,94  | 0,021376 | 0,481977                     |      |
| TC0500002962.mm.1 | 1,06 Vmn2r11          | JUC0500014301.mm.1 | -2,94  | 0,006319 | 0,38927                      |      |
| TC1100000029.mm.1 | 1,04 Gal3st1          | JUC1100000164.mm.1 | -2,94  | 0,023219 | 0,490032                     |      |
| TC1000001324.mm.1 | -1,07                 | JUC1000005338.mm.1 | -2,94  | 0,043082 | 0,548459                     |      |
| TC1200002364.mm.1 | 1,27 Begain           | JUC1200009061.mm.1 | -2,95  | 0,00682  | 0,39387                      |      |
| TC1200002364.mm.1 | 1,27 Begain           | JUC1200009065.mm.1 | -3,17  | 0,012725 | 0,436583                     |      |
| TC0100001381.mm.1 | 6,01 Rgs16            | PSR0100011431.mm.1 | -2,96  | 0,021778 | 0,48438 Cassette Exon        | 0,18 |
| TC0200003275.mm.1 | -1,03 Gm14488         | JUC0200013996.mm.1 | -2,96  | 0,003499 | 0,355638                     |      |
| TC1900001105.mm.1 | 1,37 Tmem216          | JUC1900005642.mm.1 | -2,96  | 0,001835 | 0,337414                     |      |
| TC0600003301.mm.1 | -1,18 4933406J09Rik   | JUC0600013500.mm.1 | -2,96  | 0,037147 | 0,533065                     |      |
| TC0400001147.mm.1 | 1,15 Zcchc11          | PSR0400008126.mm.1 | -2,97  | 0,02254  | 0,487201 Intron Retention    | 0,46 |
| TC1500001320.mm.1 | 3,83 Ankrd33b         | PSR1500010242.mm.1 | -2,97  | 0,028209 | 0,506368 Cassette Exon       | 0,33 |
| TC1500001320.mm.1 | 3,83 Ankrd33b         | PSR1500010241.mm.1 | -3,28  | 0,009501 | 0,416578 Cassette Exon       | 0,33 |
| TC1500001320.mm.1 | 3,83 Ankrd33b         | JUC1500005782.mm.1 | -3,67  | 0,027349 | 0,503766                     |      |
| TC1500001320.mm.1 | 3,83 Ankrd33b         | PSR1500010227.mm.1 | -3,76  | 0,001682 | 0,335182 Alternative 3' Acce | 0,44 |
| TC1500001320.mm.1 | 3,83 Ankrd33b         | JUC1500005778.mm.1 | -4,55  | 0,000448 | 0,297771                     |      |
| TC1500001320.mm.1 | 3,83 Ankrd33b         | PSR1500010243.mm.1 | -5,15  | 0,001742 | 0,335996 Cassette Exon       | 0,33 |

|                    |       |                       |                     |        |          |          |                          |
|--------------------|-------|-----------------------|---------------------|--------|----------|----------|--------------------------|
| TC1500001320.mm.1  | 3,83  | Ankrd33b              | JUC1500005781.mm.1  | -5,51  | 0,037796 | 0,534693 |                          |
| TC1500001320.mm.1  | 3,83  | Ankrd33b              | PSR1500010244.mm.1  | -6,6   | 0,001335 | 0,325349 | Cassette Exon 0,33       |
| TC1500000503.mm.1  | 3,21  | Khdrbs3               | PSR1500003555.mm.1  | -2,97  | 0,02579  | 0,498518 | Cassette Exon 0,28       |
| TC1500000503.mm.1  | 3,21  | Khdrbs3               | JUC1500002094.mm.1  | -3,1   | 0,020543 | 0,478319 |                          |
| TC1500000503.mm.1  | 3,21  | Khdrbs3               | PSR1500003541.mm.1  | -3,21  | 0,00347  | 0,355628 | Cassette Exon 0,24       |
| TC1500000503.mm.1  | 3,21  | Khdrbs3               | PSR1500003540.mm.1  | -4,35  | 0,003193 | 0,354243 | Cassette Exon 0,24       |
| TC1500000503.mm.1  | 3,21  | Khdrbs3               | JUC1500002093.mm.1  | -5,15  | 0,000169 | 0,273067 |                          |
| TC0100003140.mm.1  | 1,84  | Gm15850               | JUC0100014499.mm.1  | -2,97  | 0,011272 | 0,426793 |                          |
| TC0100003140.mm.1  | 1,84  | Gm15850               | PSR0100025515.mm.1  | -3,06  | 0,043832 | 0,550456 | Alternative 5' Donc 0,23 |
| TC0100003140.mm.1  | 1,84  | Gm15850               | JUC0100014500.mm.1  | -3,18  | 0,004357 | 0,365487 |                          |
| TC0100003140.mm.1  | 1,84  | Gm15850               | JUC0100014498.mm.1  | -3,52  | 0,042007 | 0,546101 |                          |
| TC0500002641.mm.1  | 1,32  | Aasdh                 | PSR0500023332.mm.1  | -2,97  | 0,00998  | 0,418456 | Cassette Exon 0,18       |
| TC1300000980.mm.1  | 1,08  | 2810049E08Rik         | JUC1300003333.mm.1  | -2,97  | 0,036663 | 0,531675 |                          |
| TC0800000539.mm.1  | -1,02 | Cenpu; Mlf1ip         | JUC0800002064.mm.1  | -2,97  | 0,034211 | 0,525106 |                          |
| TC06000001536.mm.1 | 3,15  | Gabarapl1             | JUC06000006596.mm.1 | -2,97  | 0,04318  | 0,548858 |                          |
| TC0400000428.mm.1  | -1,43 |                       | JUC0400001314.mm.1  | -2,97  | 0,011242 | 0,426718 |                          |
| TC1100000717.mm.1  | 1,19  | Mrpl55                | JUC1100002940.mm.1  | -2,97  | 0,005365 | 0,378627 |                          |
| TCOX00001784.mm.1  | 1,57  | Pqbp1                 | PSROX00011310.mm.1  | -2,97  | 0,030745 | 0,514065 |                          |
| TCOX00000060.mm.1  | 11,81 | Syp                   | JUCOX00000144.mm.1  | -2,98  | 0,000255 | 0,28803  |                          |
| TCOX00000060.mm.1  | 11,81 | Syp                   | JUCOX00000149.mm.1  | -3,11  | 0,002172 | 0,344453 |                          |
| TCOX00000060.mm.1  | 11,81 | Syp                   | JUCOX00000147.mm.1  | -3,14  | 0,041228 | 0,544134 |                          |
| TCOX00000060.mm.1  | 11,81 | Syp                   | PSROX00000299.mm.1  | -5,21  | 0,00078  | 0,309885 | Alternative 3' Acce 0,5  |
| TCOX00000060.mm.1  | 11,81 | Syp                   | PSROX00000289.mm.1  | -9,85  | 0,001831 | 0,33731  | Alternative 3' Acce 0,16 |
| TCOX00000060.mm.1  | 11,81 | Syp                   | PSROX00000306.mm.1  | -11,9  | 0,000187 | 0,284485 | Alternative 5' Donc 0,46 |
| TCOX00000060.mm.1  | 11,81 | Syp                   | PSROX00000294.mm.1  | -13,38 | 0,001845 | 0,337414 | Alternative 5' Donc 0,16 |
| TCOX00000060.mm.1  | 11,81 | Syp                   | PSROX00000307.mm.1  | -13,55 | 0,000199 | 0,28803  | Alternative 5' Donc 0,46 |
| TCOX00000060.mm.1  | 11,81 | Syp                   | JUCOX00000150.mm.1  | -14,08 | 0,001581 | 0,331726 |                          |
| TCOX00000060.mm.1  | 11,81 | Syp                   | JUCOX00000148.mm.1  | -16,96 | 0,000247 | 0,28803  |                          |
| TCOX00000060.mm.1  | 11,81 | Syp                   | PSROX00000295.mm.1  | -19,23 | 0,000023 | 0,22008  | Cassette Exon 0,21       |
| TCOX00000060.mm.1  | 11,81 | Syp                   | PSROX00000291.mm.1  | -28,5  | 0,001229 | 0,322251 | Alternative 3' Acce 0,16 |
| TCOX00000060.mm.1  | 11,81 | Syp                   | PSROX00000296.mm.1  | -32,34 | 0,00048  | 0,298999 | Alternative 3' Acce 0,29 |
| TCOX00000060.mm.1  | 11,81 | Syp                   | JUCOX00000151.mm.1  | -41,03 | 0,000193 | 0,28803  |                          |
| TC0600003457.mm.1  | -1,11 | Ergic2                | PSR0600027284.mm.1  | -2,98  | 0,043506 | 0,549909 | Alternative 5' Donc 0,32 |
| TC1400001494.mm.1  | 1,44  |                       | PSR1400011169.mm.1  | -2,98  | 0,028091 | 0,50608  | Alternative 5' Donc 0,32 |
| TC0200000955.mm.1  | 2,1   | Csrnp3                | PSR0200007599.mm.1  | -2,98  | 0,010388 | 0,421341 | Cassette Exon 0,29       |
| TC1700000424.mm.1  | 1,09  | Kifc5b                | JUC1700001963.mm.1  | -2,98  | 0,00604  | 0,386586 |                          |
| TC1000002164.mm.1  | -1,18 | Cep85l; 1700003O08Rik | JUC1000008248.mm.1  | -2,98  | 0,016533 | 0,459611 |                          |
| TC1400000965.mm.1  | 33,59 | Nefl                  | PSR1400007745.mm.1  | -2,99  | 0,0081   | 0,405071 | Alternative 5' Donc 0,32 |
| TC1500001863.mm.1  | -1,15 | Sox10                 | PSR1500014537.mm.1  | -2,99  | 0,043823 | 0,550456 | Alternative 5' Donc 0,23 |
| TC1400000587.mm.1  | 1,01  | Vmn2r88               | JUC1400002656.mm.1  | -2,99  | 0,009555 | 0,416829 |                          |
| TC0100001582.mm.1  | 1,09  | B4galt3               | JUC0100007376.mm.1  | -2,99  | 0,02141  | 0,482126 |                          |
| TC1500000445.mm.1  | 1,32  | 4930402D18Rik         | JUC1500001816.mm.1  | -2,99  | 0,005526 | 0,380518 |                          |
| TC1500000445.mm.1  | 1,32  | 4930402D18Rik         | JUC1500001826.mm.1  | -3,55  | 0,000908 | 0,313363 |                          |
| TC0800001917.mm.1  | 1,16  | Ddhd2                 | JUC0800008354.mm.1  | -2,99  | 0,035662 | 0,528966 |                          |
| TC0800002550.mm.1  | 1,89  | Elmod2                | PSR0800019357.mm.1  | -2,99  | 0,002603 | 0,349501 |                          |
| TC0800002550.mm.1  | 1,89  | Elmod2                | JUC0800010542.mm.1  | -3,63  | 0,043359 | 0,549429 |                          |
| TC1100004290.mm.1  | 2,14  | Commd1                | PSR1100022243.mm.1  | -3     | 0,034026 | 0,524517 | Alternative 5' Donc 0,24 |
| TC1100004290.mm.1  | 2,14  | Commd1                | JUC1100011570.mm.1  | -3,36  | 0,042206 | 0,546983 |                          |

|                   |                    |                    |       |          |          |                     |      |
|-------------------|--------------------|--------------------|-------|----------|----------|---------------------|------|
| TC1700000993.mm.1 | 1,4 Ccdc94         | JUC1700005026.mm.1 | -3    | 0,045039 | 0,553049 |                     |      |
| TC1000002156.mm.1 | 1,15 Gopc          | JUC1000008222.mm.1 | -3    | 0,009658 | 0,417484 |                     |      |
| TC0900002805.mm.1 | 1,31 Gm2382        | JUC0900013038.mm.1 | -3    | 0,02282  | 0,488291 |                     |      |
| TC1500002317.mm.1 | 3,2 Zfp385a        | PSR1500019211.mm.1 | -3,01 | 0,039703 | 0,540417 | Cassette Exon       | 0,28 |
| TC0300000866.mm.1 | 1,54 Tdrkh         | JUC0300003456.mm.1 | -3,01 | 0,005516 | 0,380428 |                     |      |
| TC0300000866.mm.1 | 1,54 Tdrkh         | JUC0300003458.mm.1 | -3,25 | 0,031833 | 0,517847 |                     |      |
| TC0900001726.mm.1 | 1,47 AK129341      | JUC0900008222.mm.1 | -3,01 | 0,02436  | 0,49362  |                     |      |
| TC0600000324.mm.1 | -1,43 Akr1b8       | JUC0600001198.mm.1 | -3,01 | 0,009857 | 0,417907 |                     |      |
| TC0500002927.mm.1 | 2,75 Glmn          | PSR0500025887.mm.1 | -3,02 | 0,01723  | 0,462633 |                     |      |
| TC0500002927.mm.1 | 2,75 Glmn          | PSR0500025888.mm.1 | -3,11 | 0,005338 | 0,378059 | Cassette Exon       | 0,19 |
| TC0500002927.mm.1 | 2,75 Glmn          | PSR0500025855.mm.1 | -3,19 | 0,01814  | 0,467376 | Alternative 3' Acce | 0,26 |
| TC0500002927.mm.1 | 2,75 Glmn          | PSR0500025866.mm.1 | -3,7  | 0,003329 | 0,354243 | Cassette Exon       | 0,24 |
| TC0500002927.mm.1 | 2,75 Glmn          | PSR0500025881.mm.1 | -4,22 | 0,009589 | 0,417183 |                     |      |
| TC1200000152.mm.1 | 2,44 Gm4983        | JUC1200000754.mm.1 | -3,02 | 0,010114 | 0,419058 |                     |      |
| TC0500001390.mm.1 | 1,56 Gpn3          | JUC0500006748.mm.1 | -3,02 | 0,02372  | 0,491521 |                     |      |
| TC0500000027.mm.1 | -1,02 Gm15750      | JUC0500000167.mm.1 | -3,02 | 0,002406 | 0,348653 |                     |      |
| TC0200001911.mm.1 | 1,65 Stard7        | PSR0200014984.mm.1 | -3,03 | 0,000474 | 0,298999 | Alternative 5' Donc | 0,32 |
| TC0200003273.mm.1 | -1,04              | PSR0200027715.mm.1 | -3,03 | 0,00122  | 0,322251 | Cassette Exon       | 0,19 |
| TC0200003335.mm.1 | -1,34              | JUC0200014408.mm.1 | -3,03 | 0,003869 | 0,358862 |                     |      |
| TC1400000790.mm.1 | -1,02 Gmpr2        | JUC1400003408.mm.1 | -3,03 | 0,023635 | 0,491089 |                     |      |
| TC1400002102.mm.1 | -1,17 Adcy4        | JUC1400008825.mm.1 | -3,03 | 0,00382  | 0,358311 |                     |      |
| TC1500002252.mm.1 | -1,08              | JUC1500010543.mm.1 | -3,03 | 0,032009 | 0,518367 |                     |      |
| TC0700000706.mm.1 | 1,25               | PSR0700005809.mm.1 | -3,04 | 0,02156  | 0,483034 | Alternative 3' Acce | 0,31 |
| TC1700001869.mm.1 | 1,77 Zfp81         | PSR1700017278.mm.1 | -3,04 | 0,029578 | 0,510459 | Alternative 5' Donc | 0,29 |
| TC0800003171.mm.1 | 1,37 Agt           | PSR0800024358.mm.1 | -3,04 | 0,019834 | 0,475536 | Cassette Exon       | 0,18 |
| TC1400001061.mm.1 | -1,11 Tpt1         | JUC1400004579.mm.1 | -3,04 | 0,002975 | 0,352501 |                     |      |
| TC1200002434.mm.1 | 1,12 Akt1          | JUC1200009314.mm.1 | -3,04 | 0,020498 | 0,478123 |                     |      |
| TC1800000623.mm.1 | -1,25 Pdgrfb       | JUC1800002494.mm.1 | -3,04 | 0,03722  | 0,533311 |                     |      |
| TC1700001805.mm.1 | 1,59 Glo1          | JUC1700008945.mm.1 | -3,04 | 0,011156 | 0,426295 |                     |      |
| TC0500002239.mm.1 | -1,15 Mfsd10       | JUC0500011158.mm.1 | -3,04 | 0,008054 | 0,404416 |                     |      |
| TC1600000171.mm.1 | 6,17 2900011O08Rik | PSR1600001237.mm.1 | -3,05 | 0,00015  | 0,272178 | Cassette Exon       | 0,2  |
| TC1600000171.mm.1 | 6,17 2900011O08Rik | JUC1600000630.mm.1 | -3,74 | 0,005999 | 0,386404 |                     |      |
| TC1600000171.mm.1 | 6,17 2900011O08Rik | JUC1600000631.mm.1 | -3,91 | 0,032332 | 0,519155 |                     |      |
| TC1600000171.mm.1 | 6,17 2900011O08Rik | PSR1600001245.mm.1 | -5,93 | 0,000199 | 0,28803  | Alternative 5' Donc | 0,45 |
| TC1600000171.mm.1 | 6,17 2900011O08Rik | JUC1600000632.mm.1 | -6,35 | 0,007304 | 0,398847 |                     |      |
| TC0900001109.mm.1 | 1,48 Gm11114       | JUC0900004730.mm.1 | -3,05 | 0,037578 | 0,534053 |                     |      |
| TC0X00003038.mm.1 | 1,05 Morf4l2       | JUC0X00009629.mm.1 | -3,05 | 0,028731 | 0,508141 |                     |      |
| TC0X00003038.mm.1 | 1,05 Morf4l2       | JUC0X00009630.mm.1 | -5,12 | 0,008971 | 0,411788 |                     |      |
| TC0800001522.mm.1 | 2,93 Tubb3         | PSR0800012490.mm.1 | -3,06 | 0,00371  | 0,357512 | Alternative 3' Acce | 0,32 |
| TC0800001522.mm.1 | 2,93 Tubb3         | JUC0800006810.mm.1 | -3,29 | 0,015785 | 0,455613 |                     |      |
| TC0200004940.mm.1 | 1,62 Snta1         | JUC0200021629.mm.1 | -3,06 | 0,004497 | 0,36828  |                     |      |
| TC1200002420.mm.1 | 1,01               | JUC1200009269.mm.1 | -3,06 | 0,004102 | 0,36228  |                     |      |
| TC0100001382.mm.1 | -1,64 Rnasel       | JUC0100006605.mm.1 | -3,06 | 0,038002 | 0,535441 |                     |      |
| TC0800002364.mm.1 | 1,62 Gm7697        | JUC0800009636.mm.1 | -3,06 | 0,003787 | 0,357586 |                     |      |
| TC0600000215.mm.1 | 1,03 Snd1          | JUC0600000708.mm.1 | -3,06 | 0,027458 | 0,504045 |                     |      |
| TC1000000829.mm.1 | -1,06 Arid3a       | JUC1000003284.mm.1 | -3,06 | 0,043129 | 0,548664 |                     |      |
| TC0X00003435.mm.1 | -1,42 Slc10a3      | JUC0X00007963.mm.1 | -3,06 | 0,02836  | 0,506881 |                     |      |
| TC1200001925.mm.1 | -1,41              | JUC1200007348.mm.1 | -3,07 | 0,017848 | 0,466223 |                     |      |



|                   |                      |                     |       |          |                              |      |
|-------------------|----------------------|---------------------|-------|----------|------------------------------|------|
| TC1800000902.mm.1 | -1,02                | JUC1800003606.mm.1  | -3,07 | 0,025977 | 0,499207                     |      |
| TC0500002496.mm.1 | -1,21                | JUC0500012128.mm.1  | -3,07 | 0,010668 | 0,423012                     |      |
| TC0700000298.mm.1 | 1,21 Ercc1           | JUC0700001121.mm.1  | -3,07 | 0,011227 | 0,426718                     |      |
| TC1000001369.mm.1 | -1                   | JUC1000005523.mm.1  | -3,07 | 0,033451 | 0,522793                     |      |
| TC1100003478.mm.1 | 1,43 Rad51c          | PSR11000031917.mm.1 | -3,08 | 0,0117   | 0,429969 Alternative 5' Donc | 0,25 |
| TC1200001460.mm.1 | 1,21 Lpin1           | JUC1200005633.mm.1  | -3,08 | 0,006179 | 0,387873                     |      |
| TC0200003705.mm.1 | 1,03 Mett15; Gm13625 | JUC0200016206.mm.1  | -3,08 | 0,028357 | 0,506875                     |      |
| TC0600002374.mm.1 | -1,1 Vmn1r31         | JUC0600009593.mm.1  | -3,08 | 0,014718 | 0,45037                      |      |
| TC1000000940.mm.1 | 1,35 D10Wsu102e      | JUC1000004030.mm.1  | -3,08 | 0,017001 | 0,461553                     |      |
| TC0200002980.mm.1 | 7,84 C1ql3           | PSR0200024607.mm.1  | -3,09 | 0,030864 | 0,514425 Cassette Exon       | 0,37 |
| TC0200002980.mm.1 | 7,84 C1ql3           | PSR0200024608.mm.1  | -5,57 | 0,005889 | 0,383835 Cassette Exon       | 0,37 |
| TC0200002980.mm.1 | 7,84 C1ql3           | JUC0200012436.mm.1  | -9,62 | 0,000202 | 0,28803                      |      |
| TC0600000584.mm.1 | 2,81 Ccdc126         | JUC0600002266.mm.1  | -3,09 | 0,002869 | 0,352207                     |      |
| TC0600000584.mm.1 | 2,81 Ccdc126         | PSR0600004477.mm.1  | -3,3  | 0,006897 | 0,394673 Alternative 3' Acce | 0,32 |
| TC0200001025.mm.1 | 1,93 Gorasp2         | JUC0200004229.mm.1  | -3,09 | 0,016377 | 0,458693                     |      |
| TC0200001025.mm.1 | 1,93 Gorasp2         | PSR0200008230.mm.1  | -3,33 | 0,026827 | 0,502373 Alternative 5' Donc | 0,23 |
| TC1300000660.mm.1 | 1,05 Grk6            | JUC1300002278.mm.1  | -3,09 | 0,007198 | 0,39798                      |      |
| TC1700001202.mm.1 | -1,06                | JUC1700006192.mm.1  | -3,09 | 0,029883 | 0,51129                      |      |
| TC0600003370.mm.1 | -1,16 Slco1a5        | JUC0600013866.mm.1  | -3,09 | 0,044394 | 0,551441                     |      |
| TC0500003112.mm.1 | -1,22 Ccdc60         | JUC0500015091.mm.1  | -3,09 | 0,005363 | 0,378627                     |      |
| TC0300000043.mm.1 | 3,2 Stmn2            | PSR0300000150.mm.1  | -3,1  | 0,003619 | 0,356223 Alternative 5' Donc | 0,26 |
| TC0300000043.mm.1 | 3,2 Stmn2            | PSR0300000146.mm.1  | -3,93 | 0,002509 | 0,349237 Alternative 3' Acce | 0,45 |
| TC0200001395.mm.1 | 3,45                 | PSR0200010929.mm.1  | -3,1  | 0,01642  | 0,458966 Alternative 3' Acce | 0,34 |
| TC1100001474.mm.1 | 2,24 Gngt2           | PSR1100013687.mm.1  | -3,11 | 0,02322  | 0,490032 Cassette Exon       | 0,33 |
| TC1100001474.mm.1 | 2,24 Gngt2           | JUC1100007164.mm.1  | -6,31 | 0,049264 | 0,562639                     |      |
| TC0200004225.mm.1 | 4,72 A930006I01Rik   | PSR0200035474.mm.1  | -3,11 | 0,010393 | 0,421409 Cassette Exon       | 0,19 |
| TC0100000116.mm.1 | 1,41 Tfp2b           | JUC0100000454.mm.1  | -3,11 | 0,018686 | 0,470362                     |      |
| TC1100000134.mm.1 | -1,06 Ikzf1          | JUC1100000730.mm.1  | -3,11 | 0,017504 | 0,463964                     |      |
| TC1000001840.mm.1 | -1,12 Myb            | JUC1000007285.mm.1  | -3,11 | 0,017867 | 0,466232                     |      |
| TC0300000489.mm.1 | 1,4                  | PSR0300003386.mm.1  | -3,12 | 0,002476 | 0,349135 Cassette Exon       | 0,2  |
| TC0800002362.mm.1 | 1,47 Gm9495          | JUC0800009625.mm.1  | -3,12 | 0,003609 | 0,356223                     |      |
| TC0700000859.mm.1 | 1 Ntn5               | JUC0700003732.mm.1  | -3,12 | 0,000149 | 0,272178                     |      |
| TC0700000821.mm.1 | 1,42 Fuz             | PSR0700006939.mm.1  | -3,13 | 0,047845 | 0,559363 Alternative 5' Donc | 0,33 |
| TC1700002454.mm.1 | 1,13 Arhgap28        | JUC1700012150.mm.1  | -3,13 | 0,000966 | 0,313363                     |      |
| TC0500001974.mm.1 | 1,02 Gm10354         | JUC0500009804.mm.1  | -3,13 | 0,014302 | 0,448073                     |      |
| TC0500003608.mm.1 | 1,03 Rnf6            | JUC0500018029.mm.1  | -3,13 | 0,028696 | 0,508019                     |      |
| TC1100001658.mm.1 | 1,24 Rnd2            | JUC1100008063.mm.1  | -3,13 | 0,012401 | 0,434961                     |      |
| TC1000000369.mm.1 | 1,03 5730435O14Rik   | JUC1000001411.mm.1  | -3,13 | 0,011921 | 0,431655                     |      |
| TC1100002611.mm.1 | 1,1 Timd2            | PSR1100024044.mm.1  | -3,14 | 0,001374 | 0,32572 Cassette Exon        | 0,19 |
| TC1300001878.mm.1 | 1,44 Gfod1           | PSR1300011701.mm.1  | -3,14 | 0,014576 | 0,449876 Cassette Exon       | 0,07 |
| TC1400001746.mm.1 | 1 2610528A11Rik      | JUC1400007441.mm.1  | -3,14 | 0,003222 | 0,354243                     |      |
| TC0900000006.mm.1 | 1,57 Gm10717         | PSR0900000056.mm.1  | -3,15 | 0,007925 | 0,403819 Alternative 5' Donc | 0,29 |
| TC1200000715.mm.1 | 1,96 Arg2            | JUC1200002919.mm.1  | -3,15 | 0,002551 | 0,349501                     |      |
| TC1200000715.mm.1 | 1,96 Arg2            | PSR1200005101.mm.1  | -3,49 | 0,00306  | 0,353892 Cassette Exon       | 0,25 |
| TC1900000431.mm.1 | 1,45 Gm9895          | PSR1900003991.mm.1  | -3,15 | 0,002898 | 0,352207 Alternative 3' Acce | 0,25 |
| TC1500001656.mm.1 | 1,03 Sla             | JUC1500007014.mm.1  | -3,15 | 0,028509 | 0,507386                     |      |
| TC0200001552.mm.1 | 1,14 Cd59a           | JUC0200005826.mm.1  | -3,15 | 0,032081 | 0,518469                     |      |
| TC1700000307.mm.1 | -1,2 Vmn2r-ps130     | JUC1700001200.mm.1  | -3,16 | 0,013526 | 0,44345                      |      |

|                   |                                 |                    |       |          |          |                          |
|-------------------|---------------------------------|--------------------|-------|----------|----------|--------------------------|
| TC0800002108.mm.1 | 2,15 Mtmr7                      | PSR0800016218.mm.1 | -3,16 | 0,001189 | 0,321162 |                          |
| TC0700000840.mm.1 | -1,36 Hrc                       | JUC0700003572.mm.1 | -3,16 | 0,040006 | 0,541155 |                          |
| TC1000001140.mm.1 | 2,81 Gm15963                    | PSR1000008641.mm.1 | -3,17 | 0,022267 | 0,485916 | Cassette Exon 0,2        |
| TC1000001140.mm.1 | 2,81 Gm15963                    | PSR1000008638.mm.1 | -3,5  | 0,008269 | 0,405976 | Cassette Exon 0,24       |
| TC0300000360.mm.1 | 1,67 Rab33b                     | PSR0300002585.mm.1 | -3,17 | 0,008542 | 0,408005 | Alternative 5' Donc 0,18 |
| TC1600000329.mm.1 | 2,16 Eif4a2; Snord2; Snora81; U | JUC1600001749.mm.1 | -3,17 | 0,001264 | 0,322251 |                          |
| TC0700004366.mm.1 | 1,12 Tial1                      | JUC0700019322.mm.1 | -3,17 | 0,049813 | 0,563739 |                          |
| TC0700004366.mm.1 | 1,12 Tial1                      | JUC0700019342.mm.1 | -3,57 | 0,04461  | 0,552129 |                          |
| TC0700004366.mm.1 | 1,12 Tial1                      | JUC0700019333.mm.1 | -4,32 | 0,000149 | 0,272178 |                          |
| TC1000002539.mm.1 | 1,04 4930404N11Rik              | JUC1000010445.mm.1 | -3,17 | 0,005342 | 0,378188 |                          |
| TC0300002151.mm.1 | -1,19 Sis                       | PSR0300016182.mm.1 | -3,18 | 0,037781 | 0,534693 | Cassette Exon 0,23       |
| TC0500001510.mm.1 | -1,01 Gbas                      | JUC0500007493.mm.1 | -3,18 | 0,045686 | 0,554833 |                          |
| TC0600002505.mm.1 | -1,11 Dnah6                     | JUC0600010163.mm.1 | -3,18 | 0,028011 | 0,505851 |                          |
| TC0600002122.mm.1 | -1,16 Mkrn1                     | JUC0600008794.mm.1 | -3,18 | 0,026592 | 0,501731 |                          |
| TC0200004364.mm.1 | 3,22 Scg5                       | PSR0200036454.mm.1 | -3,19 | 0,005529 | 0,380518 | Cassette Exon 0,24       |
| TC0200004364.mm.1 | 3,22 Scg5                       | PSR0200036448.mm.1 | -3,63 | 0,01149  | 0,42815  | Cassette Exon 0,27       |
| TC0200004364.mm.1 | 3,22 Scg5                       | PSR0200036456.mm.1 | -5,52 | 0,003936 | 0,359818 | Cassette Exon 0,24       |
| TC0900002406.mm.1 | 1,06 Arih1                      | PSR0900020273.mm.1 | -3,19 | 0,017959 | 0,466709 | Cassette Exon 0,23       |
| TC0700004085.mm.1 | 1,65 Dennd5a                    | PSR0700033764.mm.1 | -3,19 | 0,018865 | 0,471054 | Alternative 5' Donc 0,2  |
| TC1500002194.mm.1 | 1,39 Rhebl1                     | JUC1500010230.mm.1 | -3,19 | 0,02909  | 0,509063 |                          |
| TC1700000306.mm.1 | -1,33 Vmn2r-ps129               | JUC1700001195.mm.1 | -3,19 | 0,014038 | 0,44654  |                          |
| TC0700000802.mm.1 | 1,24 Syt3                       | JUC0700003280.mm.1 | -3,19 | 0,005175 | 0,376851 |                          |
| TC0900002522.mm.1 | 1 Snx1                          | JUC0900011920.mm.1 | -3,19 | 0,012522 | 0,43545  |                          |
| TC0200005223.mm.1 | -1,23 Sall4                     | JUC0200023074.mm.1 | -3,2  | 0,004093 | 0,36228  |                          |
| TC0100003025.mm.1 | -1,28 Lct                       | JUC0100013725.mm.1 | -3,2  | 0,004888 | 0,372195 |                          |
| TC1900001402.mm.1 | -1,02                           | JUC1900006683.mm.1 | -3,2  | 0,035985 | 0,529491 |                          |
| TC0900001411.mm.1 | 1,02 Qrich1                     | JUC0900006301.mm.1 | -3,2  | 0,010875 | 0,424174 |                          |
| TC0600002464.mm.1 | -1,02                           | JUC0600009896.mm.1 | -3,2  | 0,009869 | 0,417961 |                          |
| TC0700003050.mm.1 | 1,1 Ptpn5                       | JUC0700014936.mm.1 | -3,2  | 0,044859 | 0,552605 |                          |
| TC0X00000209.mm.1 | -1,01 Rgn                       | JUC0X00000607.mm.1 | -3,2  | 0,030079 | 0,511908 |                          |
| TC0600001713.mm.1 | 3,72 Gm15706                    | PSR0600013636.mm.1 | -3,21 | 0,035944 | 0,529399 | Alternative 3' Acce 0,32 |
| TC0600003386.mm.1 | 2,76                            | JUC0600013983.mm.1 | -3,21 | 0,02598  | 0,499207 |                          |
| TC0600003386.mm.1 | 2,76                            | JUC0600013982.mm.1 | -3,77 | 0,0197   | 0,474887 |                          |
| TC0X00000708.mm.1 | 1,14 Atp6ap1                    | JUC0X00002408.mm.1 | -3,21 | 0,024166 | 0,493245 |                          |
| TC1000000512.mm.1 | 1,1 Gcc2                        | JUC1000001855.mm.1 | -3,21 | 0,018333 | 0,468192 |                          |
| TC0300001701.mm.1 | 2,69 Hps3                       | PSR0300013383.mm.1 | -3,22 | 0,02503  | 0,496091 | Alternative 3' Acce 0,3  |
| TC1100000891.mm.1 | 1,44 Ctc1                       | PSR1100007433.mm.1 | -3,22 | 0,007431 | 0,399925 | Alternative 5' Donc 0,25 |
| TC0200004410.mm.1 | 2,5 Gpr176                      | PSR0200036785.mm.1 | -3,22 | 0,030904 | 0,514574 | Cassette Exon 0,13       |
| TC1600001113.mm.1 | 1,23 Gm15879                    | JUC1600004597.mm.1 | -3,22 | 0,006821 | 0,39387  |                          |
| TC1000000704.mm.1 | 3,65 Gnaz                       | PSR1000004941.mm.1 | -3,23 | 0,003952 | 0,359922 | Alternative 3' Acce 0,43 |
| TC1000000704.mm.1 | 3,65 Gnaz                       | JUC1000002698.mm.1 | -4,03 | 0,008643 | 0,408463 |                          |
| TC1000000704.mm.1 | 3,65 Gnaz                       | PSR1000004940.mm.1 | -8,64 | 0,007254 | 0,39826  | Alternative 3' Acce 0,43 |
| TC1000000192.mm.1 | -1,38 Vnn3                      | PSR1000001417.mm.1 | -3,23 | 0,014983 | 0,452048 | Alternative 3' Acce 0,34 |
| TC1700002195.mm.1 | 1,48                            | JUC1700011045.mm.1 | -3,23 | 0,046699 | 0,556856 |                          |
| TC0500002893.mm.1 | -1,02 Abcg3                     | JUC0500013887.mm.1 | -3,23 | 0,041696 | 0,545356 |                          |
| TC0400004176.mm.1 | 1,79 Palm2                      | JUC0400002220.mm.1 | -3,23 | 0,04525  | 0,553697 |                          |
| TC0700001765.mm.1 | 10,36 Cacng3                    | JUC0700007861.mm.1 | -3,24 | 0,007427 | 0,399925 |                          |
| TC0700001765.mm.1 | 10,36 Cacng3                    | PSR0700015025.mm.1 | -3,86 | 0,003348 | 0,354243 | Cassette Exon 0,16       |

|                   |                     |                    |        |          |                              |      |
|-------------------|---------------------|--------------------|--------|----------|------------------------------|------|
| TC0700001765.mm.1 | 10,36 Cacng3        | PSR0700015020.mm.1 | -9,65  | 0,001589 | 0,331726 Alternative 3' Acce | 0,36 |
| TC0700001765.mm.1 | 10,36 Cacng3        | JUC0700007864.mm.1 | -28,82 | 0,001592 | 0,331726                     |      |
| TC0700001765.mm.1 | 10,36 Cacng3        | JUC0700007863.mm.1 | -46,1  | 0,002915 | 0,352289                     |      |
| TC1500000524.mm.1 | 3,13 Ptp4a3         | PSR1500003658.mm.1 | -3,24  | 0,007193 | 0,397947 Cassette Exon       | 0,35 |
| TC1500000524.mm.1 | 3,13 Ptp4a3         | JUC1500002161.mm.1 | -3,41  | 0,01649  | 0,459391                     |      |
| TC1500000524.mm.1 | 3,13 Ptp4a3         | PSR1500003659.mm.1 | -3,74  | 0,01239  | 0,434939 Cassette Exon       | 0,35 |
| TC1500000524.mm.1 | 3,13 Ptp4a3         | JUC1500002160.mm.1 | -4,21  | 0,008432 | 0,406611                     |      |
| TC1600001582.mm.1 | 1,66 Slc15a2        | PSR1600012939.mm.1 | -3,24  | 0,021161 | 0,480949 Alternative 5' Donc | 0,27 |
| TC1600001582.mm.1 | 1,66 Slc15a2        | JUC1600006722.mm.1 | -5,1   | 0,032419 | 0,519333                     |      |
| TC1600000501.mm.1 | -1,11 Kpna1         | JUC1600002536.mm.1 | -3,24  | 0,026428 | 0,501198                     |      |
| TC0500002940.mm.1 | 1,15 Tmed5          | JUC0500014172.mm.1 | -3,24  | 0,002837 | 0,352207                     |      |
| TC0500002940.mm.1 | 1,15 Tmed5          | JUC0500014168.mm.1 | -3,59  | 0,005162 | 0,376735                     |      |
| TC0800002508.mm.1 | 1,54 Pou4f2         | PSR0800019073.mm.1 | -3,25  | 0,002124 | 0,342919 Cassette Exon       | 0,32 |
| TC0800002508.mm.1 | 1,54 Pou4f2         | JUC0800010390.mm.1 | -3,45  | 0,01856  | 0,469537                     |      |
| TC0300000209.mm.1 | -1                  | JUC0300000577.mm.1 | -3,25  | 0,015449 | 0,454271                     |      |
| TC1500001832.mm.1 | -1,1 Tmprss6        | JUC1500008177.mm.1 | -3,25  | 0,021738 | 0,484249                     |      |
| TC1700000229.mm.1 | -1,2 Vmn2r98        | JUC1700000984.mm.1 | -3,25  | 0,043977 | 0,550764                     |      |
| TC0700001434.mm.1 | 1,38                | JUC0700006402.mm.1 | -3,25  | 0,044969 | 0,552889                     |      |
| TC1000002172.mm.1 | 1,01 Fam184a        | JUC1000008286.mm.1 | -3,25  | 0,000856 | 0,311909                     |      |
| TC1400000877.mm.1 | -1,17 Rnaseh2b      | JUC1400003816.mm.1 | -3,26  | 0,035261 | 0,52837                      |      |
| TC0200004126.mm.1 | 1,37 Atg13          | JUC0200017669.mm.1 | -3,26  | 0,018644 | 0,470078                     |      |
| TC0100003068.mm.1 | 1,15 Mfsd4          | JUC0100013976.mm.1 | -3,26  | 0,006745 | 0,393343                     |      |
| TC0900000668.mm.1 | 1,43 Chrna5         | JUC0900002514.mm.1 | -3,26  | 0,037152 | 0,533065                     |      |
| TC0700004194.mm.1 | 1,59 Crym           | JUC0700018442.mm.1 | -3,26  | 0,004167 | 0,3623                       |      |
| TC1100000864.mm.1 | -1,54 Dhrs7c        | JUC1100003790.mm.1 | -3,26  | 0,008496 | 0,407077                     |      |
| TC1000002269.mm.1 | 1,32 Tet1           | JUC1000008924.mm.1 | -3,28  | 0,014748 | 0,450662                     |      |
| TC1000002269.mm.1 | 1,32 Tet1           | PSR1000016291.mm.1 | -3,61  | 0,02649  | 0,501252 Alternative 5' Donc | 0,41 |
| TC0100001398.mm.1 | 1,06                | JUC0100006642.mm.1 | -3,28  | 0,048545 | 0,561008                     |      |
| TC0500003404.mm.1 | -1,35 Tmem120a      | JUC0500016743.mm.1 | -3,28  | 0,049434 | 0,563114                     |      |
| TC0500003605.mm.1 | -1,09 1700001J03Rik | JUC0500018015.mm.1 | -3,28  | 0,03866  | 0,537102                     |      |
| TC0X00001674.mm.1 | -1,09 Fancb         | JUC0X00005455.mm.1 | -3,28  | 0,029153 | 0,509333                     |      |
| TC0700004651.mm.1 | 13,46               | JUC0700015152.mm.1 | -3,29  | 0,02929  | 0,509874                     |      |
| TC0700004651.mm.1 | 13,46               | PSR0700039182.mm.1 | -5,81  | 0,001647 | 0,333988 Cassette Exon       | 0,23 |
| TC0700004651.mm.1 | 13,46               | JUC0700015153.mm.1 | -7,03  | 0,001019 | 0,316361                     |      |
| TC0700002162.mm.1 | 2,21 Syt5           | PSR0700019725.mm.1 | -3,29  | 0,004475 | 0,367858 Cassette Exon       | 0,21 |
| TC1700000492.mm.1 | 1,07 Kctd20         | JUC1700002344.mm.1 | -3,29  | 0,029818 | 0,511132                     |      |
| TC0200003063.mm.1 | -1,18 4921504E06Rik | JUC0200012690.mm.1 | -3,3   | 0,035668 | 0,528966                     |      |
| TC1000002783.mm.1 | -1,44 Lrriq1        | JUC1000011656.mm.1 | -3,3   | 0,023128 | 0,489756                     |      |
| TC1100003043.mm.1 | -1,04 Kdm6b         | JUC1100014516.mm.1 | -3,3   | 0,026194 | 0,50003                      |      |
| TC0500002856.mm.1 | 1,07 Nkx6-1         | PSR0500025193.mm.1 | -3,31  | 0,012891 | 0,438165 Alternative 3' Acce | 0,37 |
| TC1300001812.mm.1 | 2,49 Nrn1           | PSR1300011307.mm.1 | -3,31  | 0,01093  | 0,424831 Cassette Exon       | 0,34 |
| TC1300001812.mm.1 | 2,49 Nrn1           | JUC1300005785.mm.1 | -3,75  | 0,004512 | 0,368648                     |      |
| TC1500001362.mm.1 | 1,17                | JUC1500005896.mm.1 | -3,31  | 0,01549  | 0,454456                     |      |
| TC0800000806.mm.1 | 1,07 Zfp961         | JUC0800003148.mm.1 | -3,31  | 0,039938 | 0,540973                     |      |
| TC0700003360.mm.1 | -1,08               | JUC0700015204.mm.1 | -3,31  | 0,043547 | 0,550012                     |      |
| TC0300001989.mm.1 | 1,36 Rfxap          | JUC0300007941.mm.1 | -3,31  | 0,015986 | 0,456946                     |      |
| TC0200000342.mm.1 | 2,92 Gpr158         | PSR0200001612.mm.1 | -3,32  | 0,005309 | 0,378059 Alternative 5' Donc | 0,39 |
| TC0200002032.mm.1 | 1,47 Cds2           | JUC0200008134.mm.1 | -3,32  | 0,004519 | 0,368648                     |      |

|                   |                           |                    |       |          |                              |      |
|-------------------|---------------------------|--------------------|-------|----------|------------------------------|------|
| TC0900000339.mm.1 | 1,51 PUS3                 | JUC0900001365.mm.1 | -3,32 | 0,003434 | 0,35532                      |      |
| TC0600000656.mm.1 | 1,61 Mturn; 2410066E13Rik | JUC0600002524.mm.1 | -3,32 | 0,000396 | 0,29748                      |      |
| TC0300002702.mm.1 | 1,15 Prok1                | JUC0300010957.mm.1 | -3,32 | 0,049637 | 0,563494                     |      |
| TC0X00000652.mm.1 | 1,13 Hmgb3                | JUC0X00002060.mm.1 | -3,32 | 0,00901  | 0,412369                     |      |
| TC1200001513.mm.1 | 1,03 Gm20472              | JUC1200005842.mm.1 | -3,33 | 0,020872 | 0,479521                     |      |
| TC0200005503.mm.1 | -1,05 Ell3                | JUC0200019613.mm.1 | -3,33 | 0,009762 | 0,417839                     |      |
| TC1000001081.mm.1 | 1,15 Sycp3                | JUC1000004392.mm.1 | -3,33 | 0,047067 | 0,557783                     |      |
| TC1000000843.mm.1 | 2,67 Cirbp                | JUC1000003442.mm.1 | -3,33 | 0,013598 | 0,443703                     |      |
| TC1000000843.mm.1 | 2,67 Cirbp                | JUC1000003445.mm.1 | -8,23 | 0,047636 | 0,558743                     |      |
| TC0500002250.mm.1 | 1,45 Trmt44               | PSR0500020616.mm.1 | -3,34 | 0,012661 | 0,43631 Alternative 3' Acce  | 0,31 |
| TC1500000865.mm.1 | 1,24 Ppp6r2               | JUC1500003828.mm.1 | -3,34 | 0,023833 | 0,491992                     |      |
| TC0500001678.mm.1 | 1,06 Uncx                 | JUC0500008403.mm.1 | -3,34 | 0,031972 | 0,518183                     |      |
| TC0600003164.mm.1 | 1,96 Kcna6                | JUC0600012847.mm.1 | -3,34 | 0,018356 | 0,468408                     |      |
| TC0600003164.mm.1 | 1,96 Kcna6                | JUC0600012846.mm.1 | -3,65 | 0,005857 | 0,383747                     |      |
| TC1000002385.mm.1 | 1,24 Gstt2                | JUC1000009321.mm.1 | -3,34 | 0,041997 | 0,546079                     |      |
| TC0400003106.mm.1 | 1,68 E130114P18Rik        | JUC0400012935.mm.1 | -3,34 | 0,039619 | 0,540064                     |      |
| TC0200002838.mm.1 | 2,06                      | JUC0200011941.mm.1 | -3,35 | 0,007543 | 0,401384                     |      |
| TC0200002838.mm.1 | 2,06                      | PSR0200023565.mm.1 | -3,87 | 0,006063 | 0,386691 Cassette Exon       | 0,38 |
| TC0200002838.mm.1 | 2,06                      | PSR0200023566.mm.1 | -4,49 | 0,025199 | 0,49668 Cassette Exon        | 0,38 |
| TC1100000371.mm.1 | 1,2                       | PSR1100003078.mm.1 | -3,35 | 0,027112 | 0,503022 Cassette Exon       | 0,22 |
| TC1200000669.mm.1 | 3,24                      | PSR1200004592.mm.1 | -3,35 | 0,016204 | 0,458277 Cassette Exon       | 0,22 |
| TC1500001887.mm.1 | 1,48 Npcd; Cbx6; Nptxr    | JUC1500008469.mm.1 | -3,35 | 0,00479  | 0,37131                      |      |
| TC0900000340.mm.1 | 1,48 Pate2                | JUC0900001374.mm.1 | -3,35 | 0,027289 | 0,503732                     |      |
| TC1100003986.mm.1 | 4,25 Rgs9                 | PSR1100037290.mm.1 | -3,36 | 0,020489 | 0,478019 Cassette Exon       | 0,25 |
| TC1100003986.mm.1 | 4,25 Rgs9                 | JUC1100019478.mm.1 | -3,54 | 0,007435 | 0,399934                     |      |
| TC1100003986.mm.1 | 4,25 Rgs9                 | PSR1100037322.mm.1 | -4,28 | 0,026463 | 0,501252 Alternative 5' Donc | 0,48 |
| TC1100003986.mm.1 | 4,25 Rgs9                 | PSR1100037291.mm.1 | -4,82 | 0,005421 | 0,379269 Cassette Exon       | 0,41 |
| TC1100003986.mm.1 | 4,25 Rgs9                 | PSR1100037301.mm.1 | -5,71 | 0,002116 | 0,342919 Cassette Exon       | 0,27 |
| TC1100003986.mm.1 | 4,25 Rgs9                 | JUC1100019477.mm.1 | -5,99 | 0,006754 | 0,393343                     |      |
| TC1100003986.mm.1 | 4,25 Rgs9                 | PSR1100037289.mm.1 | -6,44 | 0,008207 | 0,405909 Cassette Exon       | 0,25 |
| TC1100003063.mm.1 | -1,23 Chrn1               | JUC1100014730.mm.1 | -3,36 | 0,02572  | 0,498173                     |      |
| TC0700004625.mm.1 | 2,12 Kctd13               | PSR0700039157.mm.1 | -3,37 | 0,009128 | 0,413316 Alternative 3' Acce | 0,39 |
| TC1200000521.mm.1 | 1,34 Gm527                | JUC1200001993.mm.1 | -3,37 | 0,001131 | 0,317328                     |      |
| TC0100000994.mm.1 | 1,37                      | JUC0100004778.mm.1 | -3,37 | 0,006469 | 0,390467                     |      |
| TC1700000743.mm.1 | 1 H2-M10.5                | JUC1700004075.mm.1 | -3,37 | 0,047629 | 0,558743                     |      |
| TC0300002742.mm.1 | 1,34 Sars                 | PSR0300021571.mm.1 | -3,38 | 0,039535 | 0,539764 Alternative 5' Donc | 0,38 |
| TC0900001399.mm.1 | 1,3 Amt                   | PSR0900011234.mm.1 | -3,38 | 0,04706  | 0,557783 Alternative 5' Donc | 0,38 |
| TC1300000983.mm.1 | 1,25 Tmem161b             | PSR1300006343.mm.1 | -3,38 | 0,015238 | 0,452847 Alternative 3' Acce | 0,38 |
| TC0700001686.mm.1 | 2,19                      | PSR0700014051.mm.1 | -3,38 | 0,021734 | 0,484227 Alternative 5' Donc | 0,38 |
| TC1400001394.mm.1 | 1,01 Gm8246               | JUC1400005599.mm.1 | -3,38 | 0,041279 | 0,544166                     |      |
| TC0300000446.mm.1 | 1,02                      | JUC0300001604.mm.1 | -3,38 | 0,002366 | 0,34829                      |      |
| TC0100001223.mm.1 | -1,42 Mybph               | JUC0100005776.mm.1 | -3,39 | 0,028399 | 0,507058                     |      |
| TC0600000914.mm.1 | -1,26 Loxl3               | JUC0600003439.mm.1 | -3,39 | 0,015903 | 0,456586                     |      |
| TC1400000861.mm.1 | 1,35                      | PSR1400007029.mm.1 | -3,4  | 0,000574 | 0,304044 Alternative 3' Acce | 0,38 |
| TC0900002262.mm.1 | 1,15                      | PSR0900018832.mm.1 | -3,4  | 0,039669 | 0,540305 Cassette Exon       | 0,23 |
| TC0X00000701.mm.1 | 2,11 Rpl3-ps2             | PSR0X00004629.mm.1 | -3,41 | 0,00176  | 0,335996 Alternative 5' Donc | 0,32 |
| TC0500002486.mm.1 | -1,03 Ugdh                | JUC0500012081.mm.1 | -3,41 | 0,005799 | 0,383104                     |      |
| TC0500002284.mm.1 | -1,21 Slc2a9              | PSR0500021092.mm.1 | -3,42 | 0,007866 | 0,403545 Alternative 5' Donc | 0,38 |

|                   |                              |                    |       |          |          |                          |
|-------------------|------------------------------|--------------------|-------|----------|----------|--------------------------|
| TC1400001401.mm.1 | 1,2 Gm3424                   | JUC1400005618.mm.1 | -3,42 | 0,045136 | 0,553287 |                          |
| TC0400003991.mm.1 | -1,2                         | JUC0400017173.mm.1 | -3,42 | 0,008556 | 0,408183 |                          |
| TC1200000606.mm.1 | 1,41 2700049A03Rik           | JUC1200002332.mm.1 | -3,43 | 0,031822 | 0,517753 |                          |
| TC1800001474.mm.1 | 1,07 LOC102631870            | JUC1800006074.mm.1 | -3,43 | 0,021639 | 0,483643 |                          |
| TC0600000608.mm.1 | 1,69 Cbx3; Gm6917; Gm6901; C | JUC0600002358.mm.1 | -3,43 | 0,047015 | 0,557766 |                          |
| TC0200005326.mm.1 | 1,34                         | JUC0200023373.mm.1 | -3,44 | 0,005636 | 0,381541 |                          |
| TC1500000627.mm.1 | -1,01 Apol10a                | JUC1500002614.mm.1 | -3,44 | 0,005725 | 0,382767 |                          |
| TC1700000410.mm.1 | 1,51 Luc7l                   | JUC1700001893.mm.1 | -3,44 | 0,022467 | 0,487042 |                          |
| TC0200004613.mm.1 | 1,44                         | PSR0200039471.mm.1 | -3,45 | 0,028286 | 0,506588 | Cassette Exon 0,23       |
| TC1000001691.mm.1 | 1,59 Ipcef1                  | JUC1000006699.mm.1 | -3,45 | 0,008721 | 0,409318 |                          |
| TC1800000257.mm.1 | 1,81 Map3k2                  | PSR1800001820.mm.1 | -3,46 | 0,027525 | 0,504313 | Alternative 5' Donc 0,4  |
| TC0600002159.mm.1 | -1,22 Trpv6                  | JUC0600008928.mm.1 | -3,46 | 0,015634 | 0,455102 |                          |
| TC0800001805.mm.1 | 1,25 Defb39                  | PSR0800014399.mm.1 | -3,47 | 0,008645 | 0,408463 | Alternative 3' Acce 0,39 |
| TC0100003537.mm.1 | 1,21 Usp21                   | JUC0100016513.mm.1 | -3,47 | 0,012232 | 0,433601 |                          |
| TC0900001366.mm.1 | 1,33 6430571L13Rik           | JUC0900005860.mm.1 | -3,47 | 0,014375 | 0,448307 |                          |
| TC1400000130.mm.1 | 1,34 Top2b                   | PSR1400001061.mm.1 | -3,48 | 0,00284  | 0,352207 | Alternative 3' Acce 0,4  |
| TC1600001560.mm.1 | -1,08                        | JUC1600006675.mm.1 | -3,48 | 0,000607 | 0,304044 |                          |
| TC1400001451.mm.1 | 1,65 Gm3839                  | JUC1400005865.mm.1 | -3,49 | 0,000715 | 0,306015 |                          |
| TC1700002281.mm.1 | -1,22 Efbh                   | JUC1700011391.mm.1 | -3,49 | 0,042239 | 0,547034 |                          |
| TC1800001505.mm.1 | 1,18 Afg3l2                  | JUC1800006157.mm.1 | -3,49 | 0,014204 | 0,447701 |                          |
| TC1800001505.mm.1 | 1,18 Afg3l2                  | JUC1800006154.mm.1 | -3,77 | 0,000255 | 0,28803  |                          |
| TC1700000081.mm.1 | -1,09 Fgfr1op                | JUC1700000358.mm.1 | -3,49 | 0,014246 | 0,447947 |                          |
| TC0300000200.mm.1 | -1,14 Lrriq4                 | JUC0300000522.mm.1 | -3,5  | 0,018367 | 0,468484 |                          |
| TC0100000244.mm.1 | 1,67 Cnm4                    | JUC0100000908.mm.1 | -3,5  | 0,027639 | 0,504658 |                          |
| TC1400000392.mm.1 | 5,02 Lrit1                   | PSR1400003488.mm.1 | -3,51 | 0,006238 | 0,388361 | Cassette Exon 0,37       |
| TC1400000392.mm.1 | 5,02 Lrit1                   | JUC1400002073.mm.1 | -5,8  | 0,000935 | 0,313363 |                          |
| TC1500000852.mm.1 | 1,18 Creld2                  | JUC1500003747.mm.1 | -3,51 | 0,014336 | 0,448173 |                          |
| TC1700002769.mm.1 | 1,52 Gm3435; 9030025P20Rik   | JUC1700000763.mm.1 | -3,51 | 0,027363 | 0,503888 |                          |
| TC0500002823.mm.1 | 1,09 A830083F22              | JUC0500013480.mm.1 | -3,51 | 0,02909  | 0,509063 |                          |
| TC0500002828.mm.1 | 1,51 Hnrnpdl; Hnrpdl         | PSR0500024888.mm.1 | -3,52 | 0,016422 | 0,45898  | Alternative 5' Donc 0,36 |
| TC0500000349.mm.1 | 3,4 Ywhah                    | JUC0500001811.mm.1 | -3,52 | 0,019588 | 0,474672 |                          |
| TC0300000477.mm.1 | 1,31 Gm16527; 4930449A18Ril  | PSR0300003303.mm.1 | -3,53 | 0,028315 | 0,506741 | Cassette Exon 0,23       |
| TC1900001465.mm.1 | 1,17 Fra10ac1                | JUC1900007004.mm.1 | -3,53 | 0,046564 | 0,556761 |                          |
| TC0200001889.mm.1 | 1,19 Galk2                   | JUC0200007377.mm.1 | -3,53 | 0,041124 | 0,543963 |                          |
| TC1500001950.mm.1 | 1,56                         | JUC1500008696.mm.1 | -3,54 | 0,026883 | 0,502518 |                          |
| TC1500001950.mm.1 | 1,56                         | JUC1500008695.mm.1 | -4,15 | 0,022504 | 0,487114 |                          |
| TC1500001981.mm.1 | 1,18 Efcab6                  | JUC1500008907.mm.1 | -3,54 | 0,013258 | 0,441506 |                          |
| TC0500002322.mm.1 | 2,02                         | JUC0500011664.mm.1 | -3,54 | 0,002193 | 0,344674 |                          |
| TC1900001117.mm.1 | -1,28 Zp1                    | JUC1900005735.mm.1 | -3,55 | 0,008214 | 0,405934 |                          |
| TC0300000231.mm.1 | 1,01 4930419G24Rik           | JUC0300000716.mm.1 | -3,56 | 0,000344 | 0,289576 |                          |
| TC0900001663.mm.1 | 1,08 Lars2                   | PSR0900013967.mm.1 | -3,57 | 0,007819 | 0,403089 | Alternative 3' Acce 0,4  |
| TC1000002866.mm.1 | -1,36 1700020G17Rik          | PSR1000021674.mm.1 | -3,57 | 0,000152 | 0,272178 | Cassette Exon 0,24       |
| TC1700002757.mm.1 | 1,23 Gm1976                  | JUC1700013311.mm.1 | -3,58 | 0,02499  | 0,496025 |                          |
| TC0X00001421.mm.1 | 1,02 Alg13                   | JUC0X00004481.mm.1 | -3,58 | 0,018267 | 0,467999 |                          |
| TC0600001711.mm.1 | -1,33 Gm15543                | JUC0600007140.mm.1 | -3,59 | 0,001978 | 0,340886 |                          |
| TC0300000752.mm.1 | 1,07 Thbs3                   | JUC0300002995.mm.1 | -3,6  | 0,004658 | 0,370181 |                          |
| TC0100000628.mm.1 | 1,44                         | JUC0100002942.mm.1 | -3,6  | 0,011712 | 0,429969 |                          |
| TC1500000053.mm.1 | 1,06 Nup155                  | JUC1500000296.mm.1 | -3,6  | 0,04253  | 0,547849 |                          |

|                   |                           |                    |       |          |                              |      |
|-------------------|---------------------------|--------------------|-------|----------|------------------------------|------|
| TC0700004169.mm.1 | 1,11                      | JUC0700018242.mm.1 | -3,6  | 0,049182 | 0,562402                     |      |
| TCOX00001075.mm.1 | -1,42 Gm5127              | JUCOX00003506.mm.1 | -3,61 | 0,047365 | 0,558302                     |      |
| TC0200002857.mm.1 | 1,08 1700080N15Rik        | JUC0200012000.mm.1 | -3,63 | 0,047075 | 0,557792                     |      |
| TC1200002120.mm.1 | 1,19 Vipas39              | JUC1200008118.mm.1 | -3,63 | 0,010395 | 0,421426                     |      |
| TC1200000418.mm.1 | 1,51 Coch                 | JUC1200001657.mm.1 | -3,64 | 0,045112 | 0,553206                     |      |
| TC1100000686.mm.1 | 1,5 Zfp692                | JUC1100002851.mm.1 | -3,65 | 0,014263 | 0,447947                     |      |
| TC1100002497.mm.1 | -1,11 Dock2               | PSR1100023309.mm.1 | -3,67 | 0,013625 | 0,444111 Casette Exon        | 0,33 |
| TC0700004104.mm.1 | 1,48 Lyve1                | JUC0700017862.mm.1 | -3,67 | 0,005374 | 0,378731                     |      |
| TC0600003201.mm.1 | 1,07 Rhno1                | PSR0600024938.mm.1 | -3,68 | 0,015343 | 0,453763 Alternative 3' Acce | 0,18 |
| TCOX00001945.mm.1 | 1,27                      | PSROX00012372.mm.1 | -3,69 | 0,008967 | 0,411742 Casette Exon        | 0,25 |
| TC1800000757.mm.1 | 1,15 4930448D08Rik        | JUC1800003042.mm.1 | -3,69 | 0,033738 | 0,523558                     |      |
| TC0900000255.mm.1 | 1,28 Ncapd3               | JUC0900001044.mm.1 | -3,69 | 0,002209 | 0,345614                     |      |
| TC0200005485.mm.1 | 1,56 Sys1                 | PSR0200020518.mm.1 | -3,7  | 0,028599 | 0,507685 Casette Exon        | 0,25 |
| TC1400002763.mm.1 | 3,9                       | PSR1400020665.mm.1 | -3,72 | 0,00367  | 0,357266 Alternative 3' Acce | 0,43 |
| TC0200002850.mm.1 | 1,77 Suv39h2              | JUC0200011977.mm.1 | -3,72 | 0,025487 | 0,497664                     |      |
| TC0600000145.mm.1 | -1,14 Cftr                | JUC0600000506.mm.1 | -3,73 | 0,038602 | 0,536862                     |      |
| TC1300001037.mm.1 | 1,21 Mtx3                 | JUC1300003464.mm.1 | -3,74 | 0,037112 | 0,532942                     |      |
| TC1300000074.mm.1 | 1,51                      | JUC1300000319.mm.1 | -3,76 | 0,006811 | 0,393827                     |      |
| TC1900000904.mm.1 | 6,45 Cabp4                | PSR1900007841.mm.1 | -3,78 | 0,000939 | 0,313363 Casette Exon        | 0,24 |
| TC1900000904.mm.1 | 6,45 Cabp4                | JUC1900004296.mm.1 | -4,31 | 0,001687 | 0,335192                     |      |
| TC1900000565.mm.1 | -1,21 Cyp2c29; Cyp2c53-ps | JUC1900002726.mm.1 | -3,78 | 0,022911 | 0,488524                     |      |
| TCOX00003188.mm.1 | -1,11                     | JUCOX00010116.mm.1 | -3,79 | 0,015352 | 0,453763                     |      |
| TC0700003593.mm.1 | 1,09 Fes                  | JUC0700016060.mm.1 | -3,8  | 0,00696  | 0,395722                     |      |
| TC0700003593.mm.1 | 1,09 Fes                  | JUC0700016074.mm.1 | -3,93 | 0,000933 | 0,313363                     |      |
| TC1400002025.mm.1 | 1,24 Supt16               | JUC1400008293.mm.1 | -3,81 | 0,016397 | 0,458814                     |      |
| TC1500000842.mm.1 | -1,04                     | JUC1500003724.mm.1 | -3,81 | 0,038171 | 0,535805                     |      |
| TC1000002571.mm.1 | 1,1 Glt8d2                | JUC1000010583.mm.1 | -3,81 | 0,000894 | 0,313363                     |      |
| TC1000002274.mm.1 | 1,41 Hnrnp3; D10Bwg1070e  | JUC1000008942.mm.1 | -3,81 | 0,029171 | 0,509333                     |      |
| TC0500001753.mm.1 | 1,2 Dmr                   | JUC0500008775.mm.1 | -3,83 | 0,011404 | 0,427549                     |      |
| TC0600001245.mm.1 | 1,09 Brpf1                | PSR0600009626.mm.1 | -3,84 | 0,03282  | 0,520896 Alternative 5' Donc | 0,3  |
| TC0500001918.mm.1 | 2,49 Zfp804b              | JUC0500009607.mm.1 | -3,84 | 0,004747 | 0,371039                     |      |
| TC0900002696.mm.1 | 1,09 Tinag                | JUC0900012466.mm.1 | -3,84 | 0,002163 | 0,344238                     |      |
| TC0300001026.mm.1 | -1,1                      | PSR0300008240.mm.1 | -3,85 | 0,0386   | 0,536862 Casette Exon        | 0,26 |
| TC1600000398.mm.1 | 1,02                      | JUC1600001955.mm.1 | -3,85 | 0,023603 | 0,490995                     |      |
| TC1100000751.mm.1 | 1,37 Lrrc48               | PSR1100005927.mm.1 | -3,86 | 0,028986 | 0,508806 Alternative 3' Acce | 0,44 |
| TC1400000135.mm.1 | 1,2 Thrb                  | JUC1400000707.mm.1 | -3,86 | 0,026558 | 0,501513                     |      |
| TC0800001492.mm.1 | 1,05                      | JUC0800006629.mm.1 | -3,86 | 0,030723 | 0,514036                     |      |
| TC0Y00000014.mm.1 | 1,43                      | JUC0Y00000121.mm.1 | -3,86 | 0,00122  | 0,322251                     |      |
| TC1500001105.mm.1 | 1,17 Tarbp2               | JUC1500005052.mm.1 | -3,87 | 0,002736 | 0,349612                     |      |
| TC0500001618.mm.1 | 1,35 Vgf                  | JUC0500007984.mm.1 | -3,88 | 0,005839 | 0,383458                     |      |
| TC1700001636.mm.1 | 2,46 Syng3                | PSR1700014646.mm.1 | -3,89 | 0,004109 | 0,3623 Casette Exon          | 0,2  |
| TC1700001636.mm.1 | 2,46 Syng3                | PSR1700014648.mm.1 | -3,98 | 0,008175 | 0,40565 Alternative 5' Donc  | 0,41 |
| TC1400000397.mm.1 | 1,07                      | JUC1400002085.mm.1 | -3,89 | 0,01559  | 0,454982                     |      |
| TCOX00002820.mm.1 | 1,16 Atrx                 | JUCOX00009000.mm.1 | -3,9  | 0,047521 | 0,558686                     |      |
| TC0100003796.mm.1 | 1,13 Vash2                | JUC0100017621.mm.1 | -3,93 | 0,014974 | 0,452048                     |      |
| TC1600001702.mm.1 | -1,01                     | JUC1600007240.mm.1 | -3,95 | 0,018432 | 0,468646                     |      |
| TC0700002830.mm.1 | 1,25 4931406P16Rik        | JUC0700013536.mm.1 | -3,95 | 0,015279 | 0,453159                     |      |
| TC1000000216.mm.1 | 1,21 Med23; Gm23410       | PSR1000001554.mm.1 | -3,96 | 0,025513 | 0,497664 Alternative 3' Acce | 0,28 |

|                   |                             |                    |       |          |          |                          |
|-------------------|-----------------------------|--------------------|-------|----------|----------|--------------------------|
| TC1100003839.mm.1 | 1,24 Itga2b                 | JUC1100018731.mm.1 | -3,96 | 0,005458 | 0,379939 |                          |
| TC0800001710.mm.1 | -1,29                       | JUC0800007548.mm.1 | -3,96 | 0,032384 | 0,519221 |                          |
| TC1100002218.mm.1 | -1,35 Zpbp                  | JUC1100011249.mm.1 | -3,97 | 0,012244 | 0,433659 |                          |
| TC0900003009.mm.1 | 1,59 Abhd14a                | JUC0900014022.mm.1 | -3,97 | 0,00057  | 0,304044 |                          |
| TC1600001585.mm.1 | 1,03                        | JUC1600006745.mm.1 | -3,99 | 0,000332 | 0,28927  |                          |
| TC0X00002669.mm.1 | 1,8 Zc4h2                   | JUC0X00008473.mm.1 | -4    | 0,028498 | 0,507345 |                          |
| TC0200002332.mm.1 | -1,31 Bpifa2                | JUC0200009311.mm.1 | -4,01 | 0,025438 | 0,497549 |                          |
| TC1600001647.mm.1 | 1,38                        | JUC1600007024.mm.1 | -4,01 | 0,002264 | 0,34578  |                          |
| TC1000001340.mm.1 | 1,3 5330438D12Rik           | JUC1000005449.mm.1 | -4,04 | 0,018482 | 0,46874  |                          |
| TC1300001199.mm.1 | 6,87                        | PSR1300007627.mm.1 | -4,06 | 0,004719 | 0,370888 | Cassette Exon 0,41       |
| TC1300001199.mm.1 | 6,87                        | JUC1300003981.mm.1 | -4,97 | 0,011728 | 0,429969 |                          |
| TC1300001199.mm.1 | 6,87                        | PSR1300007628.mm.1 | -5,22 | 0,000904 | 0,313363 | Cassette Exon 0,1        |
| TC0100002560.mm.1 | -1,07                       | JUC0100011693.mm.1 | -4,06 | 0,003535 | 0,3562   |                          |
| TC0100003470.mm.1 | -1,05                       | JUC0100016231.mm.1 | -4,07 | 0,000147 | 0,272178 |                          |
| TC0600003563.mm.1 | 1,24 Igkv4-63               | JUC0600009736.mm.1 | -4,07 | 0,044564 | 0,551921 |                          |
| TC1100001049.mm.1 | 1,09 Mettl16                | JUC1100004987.mm.1 | -4,07 | 0,047078 | 0,557794 |                          |
| TC1600001539.mm.1 | 1,15 1700119H24Rik          | JUC1600006598.mm.1 | -4,08 | 0,044448 | 0,551654 |                          |
| TC1500002027.mm.1 | -1,05                       | JUC1500009100.mm.1 | -4,09 | 0,015796 | 0,455748 |                          |
| TC0100001611.mm.1 | 3,37 Kcnj10                 | PSR0100013399.mm.1 | -4,1  | 0,03999  | 0,541013 | Intron Retention 0,74    |
| TC0100001611.mm.1 | 3,37 Kcnj10                 | PSR0100013396.mm.1 | -4,64 | 0,049325 | 0,562746 | Alternative 3' Acce 0,31 |
| TC0100001611.mm.1 | 3,37 Kcnj10                 | JUC0100007572.mm.1 | -5,04 | 0,013578 | 0,443703 |                          |
| TC1200001998.mm.1 | 1,03                        | JUC1200007618.mm.1 | -4,1  | 0,034743 | 0,526574 |                          |
| TC1300001619.mm.1 | -1,07 4930557F10Rik         | JUC1300005156.mm.1 | -4,1  | 0,045625 | 0,55464  |                          |
| TC0X00000941.mm.1 | 1,02 Eda                    | JUC0X00002991.mm.1 | -4,11 | 0,02081  | 0,479505 |                          |
| TC1700000389.mm.1 | 6,04 Fbxl16                 | PSR1700003263.mm.1 | -4,12 | 0,015986 | 0,456946 | Cassette Exon 0,32       |
| TC1700000389.mm.1 | 6,04 Fbxl16                 | JUC1700001784.mm.1 | -4,2  | 0,018745 | 0,470733 |                          |
| TC1700000389.mm.1 | 6,04 Fbxl16                 | PSR1700003262.mm.1 | -5,89 | 0,008891 | 0,410717 | Cassette Exon 0,41       |
| TC0700003137.mm.1 | 7,92                        | JUC0700015079.mm.1 | -4,12 | 0,010553 | 0,422341 |                          |
| TC0700003137.mm.1 | 7,92                        | JUC0700015077.mm.1 | -7,87 | 0,013861 | 0,445426 |                          |
| TC1000002280.mm.1 | 1,27 Sirt1                  | PSR1000016362.mm.1 | -4,13 | 0,040821 | 0,543283 | Alternative 3' Acce 0,48 |
| TC1100000113.mm.1 | -1,22                       | JUC1100000611.mm.1 | -4,14 | 0,011367 | 0,427487 |                          |
| TC1100001551.mm.1 | 2,54 B230217C12Rik          | PSR1100014320.mm.1 | -4,15 | 0,037491 | 0,533968 | Alternative 3' Acce 0,44 |
| TC1700001858.mm.1 | -1,02 Cyp4f41-ps            | JUC1700009305.mm.1 | -4,17 | 0,006715 | 0,393343 |                          |
| TC0600000675.mm.1 | -1,29                       | JUC0600002643.mm.1 | -4,17 | 0,010173 | 0,419711 |                          |
| TC1100002210.mm.1 | -1,08 Pkd1l1                | JUC1100011195.mm.1 | -4,17 | 0,046933 | 0,557521 |                          |
| TC0400003809.mm.1 | 1,28 Gm13010                | JUC0400016327.mm.1 | -4,21 | 0,025553 | 0,497808 |                          |
| TC0200003834.mm.1 | 3,98 Frzb                   | PSR0200033232.mm.1 | -4,22 | 0,012247 | 0,43367  | Cassette Exon 0,28       |
| TC0200003834.mm.1 | 3,98 Frzb                   | PSR0200033230.mm.1 | -4,36 | 0,006336 | 0,389463 | Cassette Exon 0,32       |
| TC1500000784.mm.1 | 1,09 Samm50                 | JUC1500003450.mm.1 | -4,22 | 0,007363 | 0,39938  |                          |
| TC0800000201.mm.1 | 2,06                        | JUC0800000959.mm.1 | -4,22 | 0,010803 | 0,424055 |                          |
| TC0700001710.mm.1 | 1,06 Acsm2                  | JUC0700007392.mm.1 | -4,24 | 0,007197 | 0,39798  |                          |
| TC0900000106.mm.1 | 1,17                        | JUC0900000392.mm.1 | -4,26 | 0,00083  | 0,311886 |                          |
| TC1800001515.mm.1 | 1,38 Gm26910                | JUC1800006210.mm.1 | -4,28 | 0,018601 | 0,469657 |                          |
| TC0800000196.mm.1 | 1,81 4930467E23Rik; Gm21115 | JUC0800000930.mm.1 | -4,32 | 0,002148 | 0,343679 |                          |
| TC1500001026.mm.1 | 1,48 Gm17057                | JUC1500004578.mm.1 | -4,34 | 0,000174 | 0,278719 |                          |
| TC1100001504.mm.1 | 1,13 Skap1                  | PSR1100013907.mm.1 | -4,36 | 0,027336 | 0,503766 | Cassette Exon 0,28       |
| TC1100001668.mm.1 | 6,03 Arl4d                  | PSR1100015687.mm.1 | -4,39 | 0,000001 | 0,179072 | Cassette Exon 0,3        |
| TC0200003763.mm.1 | 1,15 Atf2                   | PSR0200032189.mm.1 | -4,4  | 0,0178   | 0,465641 | Alternative 3' Acce 0,1  |

|                   |       |                        |                    |        |          |          |                          |
|-------------------|-------|------------------------|--------------------|--------|----------|----------|--------------------------|
| TC0X00001201.mm.1 | 1,42  | 3110007F17Rik          | JUC0X00003724.mm.1 | -4,43  | 0,004064 | 0,361956 |                          |
| TC1800001149.mm.1 | 1,4   | Fam13b                 | JUC1800004679.mm.1 | -4,44  | 0,00341  | 0,355242 |                          |
| TC0X00000527.mm.1 | -1,35 | Gpr112                 | JUC0X00001783.mm.1 | -4,44  | 0,030179 | 0,512365 |                          |
| TC0X00002807.mm.1 | 1,19  | 5530601H04Rik; LOC1005 | PSR0X00017700.mm.1 | -4,45  | 0,038067 | 0,535633 | Alternative 3' Acce 0,47 |
| TC1500000844.mm.1 | 1,1   | Fam19a5                | JUC1500003728.mm.1 | -4,45  | 0,003659 | 0,357266 |                          |
| TC1500001092.mm.1 | 3,63  | Gm9918                 | PSR1500008709.mm.1 | -4,48  | 0,006159 | 0,387873 | Cassette Exon 0,28       |
| TC1500001092.mm.1 | 3,63  | Gm9918                 | JUC1500004948.mm.1 | -5,04  | 0,029278 | 0,509874 |                          |
| TC1500001092.mm.1 | 3,63  | Gm9918                 | JUC1500004949.mm.1 | -9,27  | 0,001782 | 0,336311 |                          |
| TC1300001674.mm.1 | 9,08  | Nrsn1                  | JUC1300005339.mm.1 | -4,52  | 0,010479 | 0,421891 |                          |
| TC1300001674.mm.1 | 9,08  | Nrsn1                  | PSR1300010428.mm.1 | -4,59  | 0,001412 | 0,326543 | Alternative 3' Acce 0,46 |
| TC1300001674.mm.1 | 9,08  | Nrsn1                  | PSR1300010436.mm.1 | -6,55  | 0,002242 | 0,34578  | Cassette Exon 0,43       |
| TC1300001674.mm.1 | 9,08  | Nrsn1                  | PSR1300010432.mm.1 | -7,39  | 0,006747 | 0,393343 | Cassette Exon 0,21       |
| TC1300001674.mm.1 | 9,08  | Nrsn1                  | PSR1300010440.mm.1 | -7,95  | 0,004313 | 0,364152 | Cassette Exon 0,41       |
| TC1300001674.mm.1 | 9,08  | Nrsn1                  | PSR1300010437.mm.1 | -8,92  | 0,002102 | 0,342919 | Cassette Exon 0,43       |
| TC1300001674.mm.1 | 9,08  | Nrsn1                  | PSR1300010434.mm.1 | -12,46 | 0,000487 | 0,298999 | Cassette Exon 0,41       |
| TC1300001674.mm.1 | 9,08  | Nrsn1                  | JUC1300005341.mm.1 | -15,58 | 0,000611 | 0,304044 |                          |
| TC1300001674.mm.1 | 9,08  | Nrsn1                  | JUC1300005342.mm.1 | -17,13 | 0,001754 | 0,335996 |                          |
| TC1800001319.mm.1 | -1    | Dtwd2                  | JUC1800005424.mm.1 | -4,53  | 0,000868 | 0,311909 |                          |
| TC1500001817.mm.1 | -1,05 | Apol11b                | JUC1500008042.mm.1 | -4,53  | 0,024581 | 0,494362 |                          |
| TC1100004056.mm.1 | -1,29 | Gm11709                | JUC1100019954.mm.1 | -4,54  | 0,012557 | 0,435731 |                          |
| TC1200001347.mm.1 | -1,07 | Dnmt3aos; Gm10485      | JUC1200005329.mm.1 | -4,55  | 0,019068 | 0,472031 |                          |
| TC0800000130.mm.1 | -1,06 | Cdc16                  | JUC0800000700.mm.1 | -4,57  | 0,000255 | 0,28803  |                          |
| TC0X00002476.mm.1 | 1,4   | Mtcp1                  | JUC0X00008073.mm.1 | -4,57  | 0,014454 | 0,44909  |                          |
| TC0100002331.mm.1 | -1,11 | 1700019A02Rik          | JUC0100010599.mm.1 | -4,59  | 0,011473 | 0,428022 |                          |
| TC1600001007.mm.1 | 1,28  | Gm15964                | PSR1600007803.mm.1 | -4,62  | 0,048981 | 0,561835 | Alternative 3' Acce 0,5  |
| TC1500001198.mm.1 | 1,06  | Spef2                  | JUC1500005445.mm.1 | -4,63  | 0,019256 | 0,473074 |                          |
| TC1500000041.mm.1 | 1,46  | Rictor                 | JUC1500000207.mm.1 | -4,63  | 0,013185 | 0,440686 |                          |
| TC0700004431.mm.1 | 1,03  | Adam12; A130023124Rik; | JUC0700019643.mm.1 | -4,64  | 0,034448 | 0,525886 |                          |
| TC1200000927.mm.1 | 8,29  |                        | PSR1200006642.mm.1 | -4,65  | 0,016603 | 0,459787 | Alternative 5' Donc 0,48 |
| TC0800002433.mm.1 | 6,08  | Nxn1                   | PSR0800018572.mm.1 | -4,66  | 0,020738 | 0,479172 | Alternative 5' Donc 0,48 |
| TC0800002433.mm.1 | 6,08  | Nxn1                   | JUC0800010101.mm.1 | -5,18  | 0,019369 | 0,473624 |                          |
| TC0800002433.mm.1 | 6,08  | Nxn1                   | JUC0800010100.mm.1 | -5,55  | 0,040354 | 0,541949 |                          |
| TC0800002433.mm.1 | 6,08  | Nxn1                   | JUC0800010102.mm.1 | -8,43  | 0,011804 | 0,430357 |                          |
| TC1900001081.mm.1 | 1,69  | Asrgl1                 | JUC1900005512.mm.1 | -4,66  | 0,005306 | 0,378059 |                          |
| TC0400000001.mm.1 | -1,05 |                        | JUC0400000005.mm.1 | -4,66  | 0,012067 | 0,432522 |                          |
| TC0400000001.mm.1 | -1,05 |                        | JUC0400000002.mm.1 | -4,69  | 0,008441 | 0,406611 |                          |
| TC1500001022.mm.1 | 1,28  | Smarcd1                | JUC1500004560.mm.1 | -4,67  | 0,026906 | 0,502518 |                          |
| TC0900000938.mm.1 | 1,33  | Sltm                   | JUC0900003945.mm.1 | -4,67  | 0,031964 | 0,518173 |                          |
| TC0X00001679.mm.1 | 1,15  | Gemin8                 | JUC0X00005468.mm.1 | -4,75  | 0,002832 | 0,352207 |                          |
| TC0200003697.mm.1 | 2,58  | Spc25                  | PSR0200031542.mm.1 | -4,76  | 0,038267 | 0,536002 | Alternative 5' Donc 0,48 |
| TC0100001967.mm.1 | 1,27  | Slco5a1                | JUC0100009145.mm.1 | -4,82  | 0,007852 | 0,403345 |                          |
| TC0200001101.mm.1 | -1,08 | Hoxd1                  | JUC0200004549.mm.1 | -4,85  | 0,023313 | 0,490065 |                          |
| TC0X00001587.mm.1 | 1,35  | Gm15155                | JUC0X00005048.mm.1 | -4,86  | 0,044475 | 0,551693 |                          |
| TC1300000602.mm.1 | 1,51  | Secisbp2               | JUC1300001956.mm.1 | -4,94  | 0,042639 | 0,548097 |                          |
| TC1300002188.mm.1 | 1,76  | Ptch1                  | JUC1300007310.mm.1 | -4,98  | 0,009346 | 0,415092 |                          |
| TC0500001439.mm.1 | 10,75 | Gm16338                | JUC0500007068.mm.1 | -4,99  | 0,009915 | 0,418378 |                          |
| TC0500001439.mm.1 | 10,75 | Gm16338                | JUC0500007067.mm.1 | -7,6   | 0,025906 | 0,498985 |                          |
| TC0500001439.mm.1 | 10,75 | Gm16338                | PSR0500012904.mm.1 | -10,05 | 0,007752 | 0,402774 | Cassette Exon 0,28       |



|                   |                                 |                    |        |          |                              |      |
|-------------------|---------------------------------|--------------------|--------|----------|------------------------------|------|
| TC0200002437.mm.1 | 5,54 Slc32a1                    | PSR0200019809.mm.1 | -5,03  | 0,012653 | 0,43631 Cassette Exon        | 0,28 |
| TC0200002437.mm.1 | 5,54 Slc32a1                    | JUC0200010038.mm.1 | -9,59  | 0,011992 | 0,432286                     |      |
| TC0200002295.mm.1 | 1,69 H13                        | JUC0200009013.mm.1 | -5,03  | 0,04907  | 0,562033                     |      |
| TC1100001998.mm.1 | 1,28 Ccdc40                     | JUC1100009882.mm.1 | -5,03  | 0,037151 | 0,533065                     |      |
| TC0100000654.mm.1 | 1,3 Ankzf1                      | JUC0100003155.mm.1 | -5,06  | 0,037352 | 0,533573                     |      |
| TC0700002768.mm.1 | 1,09 Kmt2b                      | JUC0700013160.mm.1 | -5,06  | 0,013505 | 0,443238                     |      |
| TC0900000212.mm.1 | -1,38 Cnn1                      | JUC0900000863.mm.1 | -5,09  | 0,012568 | 0,435803                     |      |
| TC0700003163.mm.1 | 7,77                            | JUC0700015084.mm.1 | -5,13  | 0,017202 | 0,462491                     |      |
| TC0700003163.mm.1 | 7,77                            | JUC0700015085.mm.1 | -9,29  | 0,015162 | 0,452699                     |      |
| TC1900000665.mm.1 | -1,36 Kazald1                   | PSR1900005884.mm.1 | -5,22  | 0,019569 | 0,474672 Cassette Exon       | 0,26 |
| TC1300002119.mm.1 | -1,31 Golm1                     | JUC1300007026.mm.1 | -5,22  | 0,01407  | 0,446841                     |      |
| TC0400001039.mm.1 | -1,32 Lepr                      | JUC0400003622.mm.1 | -5,26  | 0,034434 | 0,525858                     |      |
| TC1800000741.mm.1 | 1,13 Tcf4                       | JUC1800003021.mm.1 | -5,32  | 0,022493 | 0,487114                     |      |
| TC0200002375.mm.1 | 1,63 Mmp24                      | JUC0200009616.mm.1 | -5,32  | 0,048784 | 0,561486                     |      |
| TC0100003045.mm.1 | -1,19                           | JUC0100013859.mm.1 | -5,34  | 0,03069  | 0,513932                     |      |
| TC1300000568.mm.1 | -1,38 Omd                       | JUC1300001805.mm.1 | -5,5   | 0,000948 | 0,313363                     |      |
| TC0700001005.mm.1 | -1,15 Ttc23                     | JUC0700004759.mm.1 | -5,63  | 0,049096 | 0,562186                     |      |
| TC0200004196.mm.1 | 1,14 Gm10800                    | JUC0200018012.mm.1 | -5,64  | 0,009319 | 0,414883                     |      |
| TC1800000829.mm.1 | -1,08 Loxhd1                    | JUC1800003332.mm.1 | -5,7   | 0,000673 | 0,304338                     |      |
| TC0100003891.mm.1 | -1,86 Ifi203; LOC100862473; Grn | JUC0100016811.mm.1 | -5,81  | 0,018456 | 0,468671                     |      |
| TC0500001971.mm.1 | 3,6 Gm26954                     | JUC0500009792.mm.1 | -5,82  | 0,02761  | 0,504557                     |      |
| TC0500001971.mm.1 | 3,6 Gm26954                     | JUC0500009794.mm.1 | -7,69  | 0,000006 | 0,179072                     |      |
| TC0300001022.mm.1 | 2,83 Nhlh2                      | PSR0300008209.mm.1 | -5,87  | 0,011251 | 0,426718 Intron Retention    | 0,75 |
| TC1100003138.mm.1 | 1,09 4933427D14Rik              | JUC1100015245.mm.1 | -5,87  | 0,00311  | 0,353892                     |      |
| TC1500001013.mm.1 | -1,07 Tmbim6                    | PSR1500007987.mm.1 | -5,88  | 0,006141 | 0,387604 Alternative 5' Donc | 0,48 |
| TC1500000317.mm.1 | 1,37 Zfpn2                      | JUC1500001330.mm.1 | -6,04  | 0,001519 | 0,330268                     |      |
| TC1100003941.mm.1 | 2,25 Kpna2                      | JUC1100019349.mm.1 | -6,14  | 0,045387 | 0,554078                     |      |
| TC0100000093.mm.1 | 1,34                            | JUC0100000380.mm.1 | -6,15  | 0,003047 | 0,353892                     |      |
| TC0900000534.mm.1 | 1,76 Scn2b                      | JUC0900001886.mm.1 | -6,37  | 0,025545 | 0,497801                     |      |
| TC0300002672.mm.1 | -1,04 Ddx20                     | JUC0300010829.mm.1 | -6,37  | 0,012761 | 0,436997                     |      |
| TC0400003584.mm.1 | 11,57 Hpca                      | JUC0400015221.mm.1 | -6,53  | 0,000287 | 0,28803                      |      |
| TC0400003584.mm.1 | 11,57 Hpca                      | PSR0400029172.mm.1 | -6,87  | 0,002703 | 0,349612 Alternative 5' Donc | 0,16 |
| TC0400003584.mm.1 | 11,57 Hpca                      | PSR0400029169.mm.1 | -7,15  | 0,004239 | 0,363295 Alternative 5' Donc | 0,46 |
| TC0400003584.mm.1 | 11,57 Hpca                      | PSR0400029173.mm.1 | -7,36  | 0,000263 | 0,28803 Cassette Exon        | 0,21 |
| TC0400003584.mm.1 | 11,57 Hpca                      | JUC0400015220.mm.1 | -7,75  | 0,001199 | 0,321568                     |      |
| TC0400003584.mm.1 | 11,57 Hpca                      | JUC0400015223.mm.1 | -7,88  | 0,004892 | 0,372195                     |      |
| TC0400003584.mm.1 | 11,57 Hpca                      | PSR0400029184.mm.1 | -10,11 | 0,00328  | 0,354243 Cassette Exon       | 0,28 |
| TC0400003584.mm.1 | 11,57 Hpca                      | PSR0400029178.mm.1 | -12,23 | 0,003893 | 0,359372 Cassette Exon       | 0,21 |
| TC0400003584.mm.1 | 11,57 Hpca                      | PSR0400029171.mm.1 | -12,23 | 0,000665 | 0,304044 Alternative 5' Donc | 0,16 |
| TC0400003584.mm.1 | 11,57 Hpca                      | PSR0400029182.mm.1 | -12,99 | 0,003941 | 0,359922 Cassette Exon       | 0,41 |
| TC0400003584.mm.1 | 11,57 Hpca                      | PSR0400029183.mm.1 | -13,2  | 0,001675 | 0,335182 Cassette Exon       | 0,28 |
| TC0400003584.mm.1 | 11,57 Hpca                      | JUC0400015227.mm.1 | -13,36 | 0,004757 | 0,371039                     |      |
| TC0400003584.mm.1 | 11,57 Hpca                      | PSR0400029177.mm.1 | -13,9  | 0,002479 | 0,349135 Cassette Exon       | 0,34 |
| TC0400003584.mm.1 | 11,57 Hpca                      | JUC0400015225.mm.1 | -16,34 | 0,003243 | 0,354243                     |      |
| TC0400003584.mm.1 | 11,57 Hpca                      | PSR0400029179.mm.1 | -17,45 | 0,001897 | 0,338712 Cassette Exon       | 0,21 |
| TC0100000027.mm.1 | -1,04 Pcmtd1                    | JUC0100000133.mm.1 | -6,92  | 0,001034 | 0,316361                     |      |
| TC1100004206.mm.1 | 10,54 Pde6g                     | JUC1100021069.mm.1 | -6,94  | 0,016379 | 0,458696                     |      |
| TC1100004206.mm.1 | 10,54 Pde6g                     | PSR1100040112.mm.1 | -10,07 | 0,00522  | 0,377078 Cassette Exon       | 0,29 |

|                   |                     |                    |        |          |          |                          |
|-------------------|---------------------|--------------------|--------|----------|----------|--------------------------|
| TC1400000084.mm.1 | -1,21 4930455B14Rik | JUC1400000460.mm.1 | -7     | 0,007319 | 0,39887  |                          |
| TC1500001178.mm.1 | -1,1 Nipbl          | JUC1500005324.mm.1 | -7,17  | 0,027983 | 0,505748 |                          |
| TC1200001812.mm.1 | 12,24               | PSR1200012387.mm.1 | -7,23  | 0,012395 | 0,434939 | Cassette Exon 0,28       |
| TC1200000588.mm.1 | 1,38 Tmx1           | JUC1200002208.mm.1 | -7,37  | 0,01443  | 0,448873 |                          |
| TC0600002815.mm.1 | 2,33 A930015G24Rik  | JUC0600011338.mm.1 | -8,04  | 0,001939 | 0,340349 |                          |
| TC0800002544.mm.1 | 1,56 Zfp330         | JUC0800010525.mm.1 | -8,26  | 0,009954 | 0,41841  |                          |
| TC1900001077.mm.1 | 5,66 Rom1           | PSR1900010084.mm.1 | -8,29  | 0,006828 | 0,393893 | Alternative 5' Donc 0,48 |
| TC0200002017.mm.1 | 4,29                | PSR0200016047.mm.1 | -8,36  | 0,028894 | 0,50858  | Cassette Exon 0,28       |
| TC0800000146.mm.1 | 1,26 Cln8           | JUC0800000767.mm.1 | -8,82  | 0,043106 | 0,548593 |                          |
| TC0200004213.mm.1 | 1,49 Trim44         | JUC0200018067.mm.1 | -9,83  | 0,001458 | 0,328465 |                          |
| TC0900001143.mm.1 | 2,23                | JUC0900004881.mm.1 | -10,55 | 0,01174  | 0,429995 |                          |
| TC1100003551.mm.1 | 1,06 Utp18          | JUC1100016901.mm.1 | -12,58 | 0,039973 | 0,540973 |                          |
| TC0800003224.mm.1 | 2,11 Zdhhc2         | JUC0800001752.mm.1 | -13,62 | 0,032174 | 0,518761 |                          |
| TC0700004621.mm.1 | 1,1 Tarsl2          | JUC0700004606.mm.1 | -13,65 | 0,00269  | 0,349612 |                          |
| TC1400000393.mm.1 | 8,76 Lrit2          | JUC1400002077.mm.1 | -15,03 | 0,000492 | 0,299146 |                          |
